# Supplementary material
Source: PubMed Central journal article supplement (PMC6047024)
Supplement: ml8b00183_si_001.pdf [file ml8b00183_si_001.pdf]

# Profiling and Application of Photoredox C( $sp^3$ )-C( $sp^2$ ) Cross-Coupling in Medicinal Chemistry

Rui Zhang,<sup>a</sup> Guoqing Li,<sup>a</sup> Michael Wismer,<sup>b</sup> Petr Vachal,<sup>a</sup> Steven L. Colletti<sup>a</sup> and Zhi-Cai Shi<sup>a\*</sup>

a, Discovery Chemistry, Merck Sharp & Dohme Corp., Kenilworth, NJ, USA

b, Scientific Engineering & Design, Merck Sharp & Dohme Corp., Kenilworth, NJ, USA

**Keywords:** Photoredox catalysis, C( $sp^3$ )-C( $sp^2$ ) cross-coupling, integrated photoreactor, informer library

**This PDF file includes:**

Materials and Methods

Supplementary Text

NMR Spectra

## Table of Contents

|             |                                                                                                                |            |
|-------------|----------------------------------------------------------------------------------------------------------------|------------|
| <b>I.</b>   | <b>General Experimental Information</b>                                                                        | <b>S3</b>  |
| <b>II.</b>  | <b>Experimental Procedures and Spectroscopic Data of Informer Library</b>                                      | <b>S4</b>  |
| <b>III.</b> | <b>Experimental Procedures and Spectroscopic Data of 6-chloro-4-(2,4-difluorophenyl)picolinonitrile Series</b> | <b>S22</b> |
| <b>IV.</b>  | <b>NMR Spectral Data for Novel Compounds</b>                                                                   | <b>S31</b> |

## I. General Experimental Information

Scaffolds **X1** - **X18** and 6-chloro-4-(2,4-difluorophenyl)picolinonitrile were requested from Merck Sharp & Dohme internal compound collection and used without further purification. All other starting materials and reagents required for the synthesis were commercially available (commercial sources such as Sigma-Aldrich, Acros Organics, Strem Chemicals, etc.).

All reactions were set up under nitrogen atmosphere inside a glove box.

Integrated photoreactor - Royal Blue (450 nm) LED lights, with fan rate: 4700 rpm, stir rate: 1000 rpm, LED light intensity: 100%. Kessil lamps - Kessil KSH150B Grow Light Blue: Two Kessil lamps were 7 cm away from reaction vessels. Cooling fan - electric fan from ebm-papst 4414FNH – was 6 cm above reaction vessels. Reaction vessels were taped on top of stirring plate, using double sided white Scotch Mounting Squares.

Reaction conversion was calculated based on AUC (area under curve) of LCMS spectra at UV 254 nm. Reaction conversion = AUC of desired product / (AUC of desired product + AUC of by-product(s) + AUC of unreacted starting material)

The abbreviations used in the entire specification may be summarized herein below with their particular meaning.

°C (degree Celsius); % (percentage); rpm (rounds per minute); cm (centimetre); nm (nanometre); HPLC (high-performance liquid chromatography); TLC (thin layer chromatography); LCMS (liquid chromatography mass spectroscopy); HRMS (high resolution mass spectra);  $R_T$  (LCMS retention time); AUC (area under curve); ESI (electrospray ionization); mmol (millimoles); M (molar);  $\mu$ L (microlitre); mL (millilitre); mg (milligram); min. (minutes); h (hours); LED (light-emitting diode); Barton's base (2-*tert*-butyl-1,1,3,3-tetramethylguanidine); TTMS (tris(trimethylsilyl)silane); Boc (*tert*-butyloxycarbonyl); dtbbpy (4,4'-di-*tert*-butyl-2,2'-bipyridine); THP (tetrahydropyran); TFA (trifluoroacetic acid); DMF (*N,N*-dimethylformamide); DMSO (dimethyl sulfoxide); DME (1,2-dimethoxyethane); eq. (equivalent); DMSO- $d_6$  (deuterated DMSO); CDCl<sub>3</sub> (deuterated chloroform); TMS (tetramethylsilane).

For compounds purified with semi-preparative reverse phase HPLC (high performance liquid chromatography): Mass Directed purification system. Column - Waters Sunfire C18, 5  $\mu$ m, 19x100 mm. Gradient conditions - 8 min. run time; flow rate: 25 mL/min.; 8-80% CH<sub>3</sub>CN in H<sub>2</sub>O (Method A: 0.16% TFA in both CH<sub>3</sub>CN and H<sub>2</sub>O; Method B: 0.16% Formic Acid in both CH<sub>3</sub>CN and H<sub>2</sub>O; Method C: 0.16% pH 10 Ammonium Hydroxide in both CH<sub>3</sub>CN and H<sub>2</sub>O).

For compounds purified with preparative TLC (thin layer chromatography) plate: Silica gel GF UV254 20 x 20 cm, 1000 micron from Analtech, Inc. was used. Elution solvents: low to high % more polar solvent/less polar solvent (e.g., 60% EtOAc/heptane).

For compounds purified with Silica Gel Chromatography: CombiFlash<sup>®</sup> R<sub>f</sub> Flash Chromatography System from Teledyne ISCO was used, with RediSep R<sub>f</sub> Gold Silica (20 – 40  $\mu$ m) Flash Chromatography Column. Gradient conditions: low to high % more polar solvent/less polar solvent (e.g., 15 – 100% EtOAc/hexanes).

For compounds purified with SFC (supercritical fluid chromatography): Instrument: Thar 80 SFC; Column: Chiralpak AS-H, 5  $\mu$ m, 21 x 250 mm; Conditions: 20% MeOH/ACN 1:1 + 0.2% DIPA (diisopropylamine) @ 50 g/min, 120 bar, 40°C, 210 nm

For compounds purified with micro-scale reverse phase HPLC (high performance liquid chromatography): Mass Directed purification system. Waters Auto Purification HPLC/MS system (2545 Binary Gradient Module, 2767 Sample Manager, Waters 3100 Mass detector, 2998 Photodiode Array Detector) equipped with a Waters CSH 5  $\mu$ m 10 x 50 mm column using gradient chromatography ACN/Water (containing 0.16% TFA modifier or 0.16% NH<sub>4</sub>OH), flow rate = 8 mL/min.

Volatiles were removed with Method A: GeneVac EZ-2 Evaporator or Method B: Buchi R-215 rotavapor system.

Low resolution mass spectra were obtained on a Waters SQ Detector with ESI source, and a photodiode array detector. Method: MS parameters were as follows: Capillary voltage: 3000 V, drying gas flow: 650 L/hr, drying gas temperature: 450°C. Samples were induced via a Waters UPB binary solvent manager. UV absorption was observed at 215 nm and 254 nm with a 4nm bandwidth. Column: Waters Acquity UPLC<sup>®</sup> HSS C18, 2.1 x 50 mm, 1.8  $\mu$ m. Gradient conditions: In 2 min. run: 5% to 100% CH<sub>3</sub>CN in H<sub>2</sub>O (0.1% TFA) over 1.4 min., hold at 100% CH<sub>3</sub>CN for 0.4 min., flow rate: 1.0 mL/min., with column temperature at 50°C. In 5 min. run: 5% to 100% CH<sub>3</sub>CN in H<sub>2</sub>O (0.1% TFA) over 4.4 min., hold at 100% CH<sub>3</sub>CN for 0.4 min., flow rate: 1.0 mL/min., with column temperature at 50°C. High resolution mass spectra (HRMS) were obtained on a Waters SQ Detector with ESI source. Column: Waters Acquity UPLC<sup>®</sup> HSS C18, 2.1 x 50 mm, 1.8  $\mu$ m. Gradient conditions: 20% to 90% CH<sub>3</sub>CN in H<sub>2</sub>O (0.05% TFA) over 10 min., hold at 90% CH<sub>3</sub>CN in H<sub>2</sub>O for 1.5 min., flow rate: 0.3 mL/min., with column temperature at 40°C and auto sampler temperature at 10°C.

All NMR (nuclear magnetic resonance) spectra were recorded on a 500 MHz Bruker NMR spectrometer. <sup>1</sup>H and <sup>13</sup>C chemical shifts are reported in  $\delta$  values in ppm (parts per million) downfield with the deuterated solvent as the internal standard. Data are reported as follows: chemical shift, multiplicity (s = singlet, d = doublet, t = triplet, q = quartet, br = broad, m = multiplet), integration, coupling constant (Hz). Standard 2D COSY, ROESY, HSQC and HMBC experiments are utilized for the assignment of <sup>1</sup>H and <sup>13</sup>C resonances and structure elucidation.

## II. Experimental Procedures and Spectroscopic Data of Informer Library

**Table 1: Percentage of remaining informer/desired product in crude reaction mixture (reaction time). Reactions were carried out using catalytic photoredox  $C(sp^3)$ - $C(sp^2)$  cross-coupling of the informer heterocyclic halides via decarboxylative coupling or cross-electrophile coupling using Integrated Photoreactor or Kessil Lamp.**

|                                                                                     | Meth-<br>od | LED<br>de-<br>vice | Ir.<br>cat. | X1<br>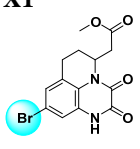    | X2<br>    | X3<br>    | X4<br>    | X5<br>    | X6<br>    |
|-------------------------------------------------------------------------------------|-------------|--------------------|-------------|--------------------------------------------------------------------------------------------|--------------------------------------------------------------------------------------------|--------------------------------------------------------------------------------------------|---------------------------------------------------------------------------------------------|----------------------------------------------------------------------------------------------|----------------------------------------------------------------------------------------------|
|    | A           | KL                 | 1           | 0/26 (16h)                                                                                 | 0/73 (16h)                                                                                 | 0/<10 (16h)                                                                                | 0/68 (16h)                                                                                  | 0/40 (16h)                                                                                   | 0/40 (16h)                                                                                   |
|                                                                                     | B           | IP                 | 1           | 13/25 (1h)                                                                                 | 0/69 (2h)                                                                                  | 0/<10 (2h)                                                                                 | 0/30 (2h)                                                                                   | 0/50 (1h)                                                                                    | 0/45 (1h)                                                                                    |
|    | C           | KL                 | 1           | 90/<10 (16h)                                                                               | 64/<10 (16h)                                                                               | 85/0 (16h)                                                                                 | 20/0 (16h)                                                                                  | 94/0 (16h)                                                                                   | 72/<10 (16h)                                                                                 |
|                                                                                     | D           | IP                 | 1           | 16/<10 (10h)                                                                               | 0/70 (2h)                                                                                  | 59/<10 (8h)                                                                                | 52/18 (8h)                                                                                  | 100/0 (4h)                                                                                   | 0/20 (6h)                                                                                    |
|                                                                                     | E           | IP                 | 2           | 21/32 (12h)                                                                                | 6/56 (2h)                                                                                  | 13/29 (3h)                                                                                 | 21/37 (3h)                                                                                  | 34/21 (12h)                                                                                  | 11/23 (3h)                                                                                   |
|                                                                                     |             |                    |             | X7<br>    | X8<br>    | X9<br>    | X10<br>   | X11<br>   | X12<br>   |
|   | A           | KL                 | 1           | 0/0 (16h)                                                                                  | 0/20 (16h)                                                                                 | 0/0 (16h)                                                                                  | 0/0 (16h)                                                                                   | 0/0 (16h)                                                                                    | 0/30 (16h)                                                                                   |
|                                                                                     | B           | IP                 | 1           | 0/0 (2h)                                                                                   | 0/40 (2h)                                                                                  | 0/0 (2h)                                                                                   | 0/0 (1h)                                                                                    | 0/0 (1h)                                                                                     | 0/35 (1h)                                                                                    |
|  | C           | KL                 | 1           | 9/0 (16h)                                                                                  | 100/0 (16h)                                                                                | 80/0 (16h)                                                                                 | 31/0 (16h)                                                                                  | 44/0 (16h)                                                                                   | 93/<10 (16h)                                                                                 |
|                                                                                     | D           | IP                 | 1           | 0/0 (2h)                                                                                   | 0/30 (5h)                                                                                  | 40/0 (8h)                                                                                  | 0/0 (2h)                                                                                    | 22/0 (6h)                                                                                    | 100/0 (6h)                                                                                   |
|                                                                                     | E           | IP                 | 2           | 0/0 (2h)                                                                                   | 32/30 (2h)                                                                                 | 100/0 (2h)                                                                                 | 33/0 (8h)                                                                                   | 50/0 (2h)                                                                                    | 86/0 (2h)                                                                                    |
|                                                                                     |             |                    |             | X13<br> | X14<br> | X15<br> | X16<br> | X17<br> | X18<br> |
|  | A           | KL                 | 1           | 0/26 (16h)                                                                                 | 0/0 (16h)                                                                                  | 0/0 (16h)                                                                                  | 72/0 (16h)                                                                                  | 0/0 (16h)                                                                                    | 50/<10 (16h)                                                                                 |
|                                                                                     | B           | IP                 | 1           | 0/31 (1h)                                                                                  | 0/0 (1h)                                                                                   | 0/35 (1h)                                                                                  | 57/0 (14h)                                                                                  | 0/0 (2h)                                                                                     | 33/<10 (2h)                                                                                  |
|  | C           | KL                 | 1           | 93/<10 (16h)                                                                               | 87/0 (16h)                                                                                 | 40/0 (16h)                                                                                 | 0/0 (16h)                                                                                   | 100/0 (16h)                                                                                  | 84/0 (16h)                                                                                   |
|                                                                                     | D           | IP                 | 1           | 0/20 (10h)                                                                                 | 91/0 (4h)                                                                                  | 0/<10 (7h)                                                                                 | 100/0 (2h)                                                                                  | 100/0 (2h)                                                                                   | 56/0 (2h)                                                                                    |
|                                                                                     | E           | IP                 | 2           | 14/20 (8h)                                                                                 | 81/<10 (8h)                                                                                | 22/<10 (2h)                                                                                | 61/0 (8h)                                                                                   | 100/0 (2h)                                                                                   | 38/0 (2h)                                                                                    |

KL – Kessil Lamp

IP – Integrated Photoreactor

Photocatalyst 1 -  $(Ir[dF(CF_3)ppy]_2(dtbbpy))PF_6$

Photocatalyst 2 -  $(Ir[dF(CH_3)ppy]_2(dtbbpy))PF_6$

**General Scheme 1: Catalytic photoredox  $C(sp^3)$ - $C(sp^2)$  cross-coupling of informer heterocyclic halides with THP-COOH in the present of photocatalyst 1 using Integrated Photoreactor**

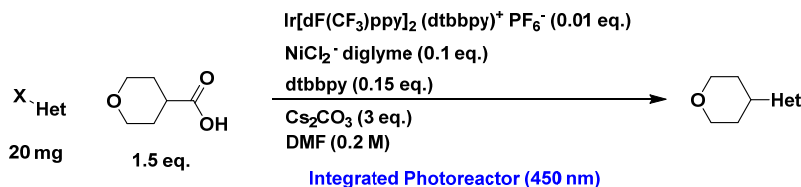

**General Procedure 1:**

A 2-dram vial equipped with a stir bar was charged with Aryl-halide (20 mg), tetrahydropyran-2-carboxylic acid (1.5 eq.), 4,4'-di-*tert*-butyl-2,2'-bipyridine (0.15 eq.),  $(\text{Ir}[\text{dF}(\text{CF}_3)\text{ppy}]_2(\text{dtbbpy}))\text{PF}_6$  (0.01 eq.), nickel(II) chloride ethylene glycol di-methyl ether complex (0.1 eq.) and cesium carbonate (3 eq.). It was transferred into glove box. Anhydrous DMF (0.2 M) was added into the reaction mixture. It was capped and taken out of glove box. Irradiated with Integrated Photoreactor for 0.5 h, Royal Blue (450 nm) LED light. 100% LED light power was applied. Stir rate was 1000 rpm. Fan rate was 4700 rpm. The reaction was checked with LCMS. If the reaction was not complete, let it run till the time indicated in **Table 1**. Reaction conversion was calculated based on AUC (area under curve) of LCMS spectra at 254 nm. Reaction Conversion = AUC of desired product / (AUC of desired product + AUC of by-product(s) + AUC of unreacted starting material). Results were shown in **Table 1**. For high conversion reaction, the following work-up procedure was applied. Reaction mixture was partitioned between EtOAc (2 mL) and water (0.5 mL). Aqueous layer was extracted with EtOAc (2 mL). The combined organic layers was concentrated with GeneVac to dryness. The residue was purified with semi-preparative reverse phase HPLC system, to afford the desired product. To obtain good NMR spectra, the residue could be further purified with prep. TLC and then micro-scale reverse phase HPLC system.

**General Scheme 2: Catalytic photoredox  $C(sp^3)$ - $C(sp^2)$  cross-coupling of informer heterocyclic halides with THP-COOH in the present of photocatalyst 2 using Integrated Photoreactor**

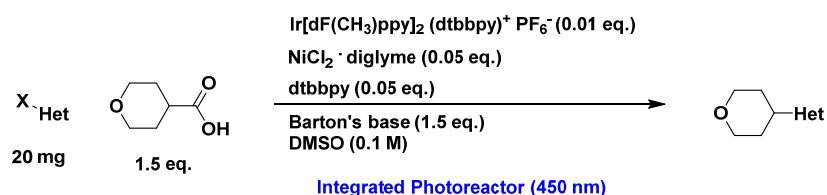

**General Procedure 2:**

A 2-dram vial equipped with a stir bar was charged with Aryl-halide (20 mg), tetrahydropyran-2-carboxylic acid (1.5 eq.), 4,4'-di-*tert*-butyl-2,2'-bipyridine (0.05 eq.),  $(\text{Ir}[\text{dF}(\text{CH}_3)\text{ppy}]_2(\text{dtbbpy}))\text{PF}_6$  (0.01 eq.), and nickel(II) chloride ethylene glycol di-methyl ether complex (0.05 eq.). It was transferred into glove box. Anhydrous DMSO (0.1 M) and Barton's base (1.5 eq.) were added into the reaction mixture. It was capped and taken out of glove box. Irradiated with Integrated Photoreactor for 1 h, Royal Blue (450 nm) LED light. 100% LED light power was applied. Stir rate was 1000 rpm. Fan rate was 4700 rpm. The reaction was checked with LCMS. If the reaction was not complete, let it run till the time indicated in **Table 1**. Reaction conversion was calculated based on AUC (area under curve) of LCMS spectra at 254 nm. Reaction Conversion = AUC of desired product / (AUC of desired product + AUC of by-product(s) + AUC of unreacted starting material). Results were shown in **Table 1**. For high conversion reaction, the following work-up procedure was applied. Reaction mixture was partitioned between EtOAc (2 mL) and water (0.5 mL). Aqueous layer was extracted with EtOAc (2 mL). The combined organic layers was concentrated with GeneVac to dryness. The residue was purified with semi-preparative reverse phase HPLC system, to afford the desired product. To obtain good NMR spectra, the residue could be further purified with prep. TLC and then micro-scale reverse phase HPLC system.

**General Scheme 3: Catalytic photoredox  $C(sp^3)$ - $C(sp^2)$  cross-coupling of informer heterocyclic halides with THP-Br using Integrated Photoreactor**

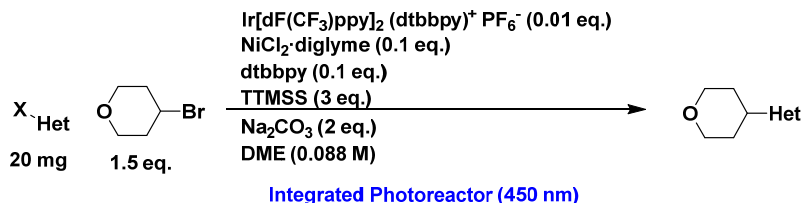

**General Procedure 3:**

A 2-dram vial equipped with a stir bar was charged with Aryl-halide (20 mg), 4,4'-di-*tert*-butyl-2,2'-bipyridine (0.1 eq.),  $(\text{Ir}[\text{dF}(\text{CF}_3)\text{ppy}]_2(\text{dtbbpy}))\text{PF}_6$  (0.01 eq.), nickel(II) chloride ethylene glycol di-methyl ether complex (0.1 eq.) and sodium carbonate (2 eq.). It was transferred into glove box. Anhydrous 1,2-dimethoxyethane (0.088 M), 4-bromotetrahydro-2H-pyran (1.5 eq.), and TTMS (3 eq.) were added into the reaction mixture. It was capped and taken out of glove box. Irradiated with Integrated

Photoreactor for 1 h, Royal Blue (450 nm) LED light. 100% LED light power was applied. Stir rate was 1000 rpm. Fan rate was 4700 rpm. The reaction was checked with LCMS. If the reaction was not complete, let it run for another hour. Reaction conversion was calculated based on AUC (area under curve) of LCMS spectra at 254 nm. Reaction Conversion = AUC of desired product / (AUC of desired product + AUC of by-product(s) + AUC of unreacted starting material). Results were shown in **Table 1**. For high conversion reaction, the following work-up procedure was applied. Reaction mixture was partitioned between EtOAc (2 mL) and water (0.5 mL). Aqueous layer was extracted with EtOAc (2 mL). The combined organic layers was concentrated with GeneVac to dryness. The residue was purified with semi-preparative reverse phase HPLC system, to afford the desired product. To obtain good LCMS and NMR spectra, the residue could be further purified with prep. TLC and then micro-scale reverse phase HPLC system.

**General Scheme 4: Catalytic photoredox C(sp<sup>3</sup>)-C(sp<sup>2</sup>) cross-coupling of informer heterocyclic halides with THP-Br using Kessil Lamps**

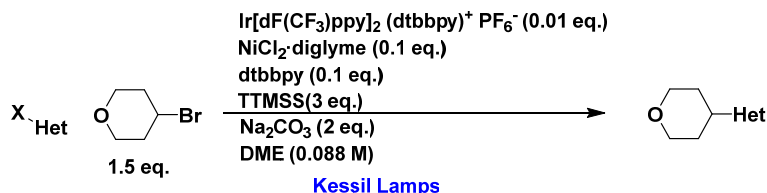

**General Procedure 4:**

A 2-dram vial equipped with a stir bar was charged with Aryl-halide (0.05 mmol), 4,4'-di-*tert*-butyl-2,2'-bipyridine (0.1 eq.), (Ir[dF(CF<sub>3</sub>)ppy]<sub>2</sub>(dtbbpy))PF<sub>6</sub> (0.01 eq.), nickel(II) chloride ethylene glycol di-methyl ether complex (0.1 eq.) and sodium carbonate (2 eq.). It was transferred into glove box. Anhydrous DME (0.088 M), 4-bromotetrahydro-2*H*-pyran (1.5 eq.), and TTMSS (3 eq.) were added into each reaction mixture. It was capped and taken out of glove box. Each four or three reactions were irradiated with two Kessil Lamps for 16 h. Kessil lamps - Kessil KSH150B Grow Light Blue - were 7 cm away from reaction vessels. Cooling fan - electric fan from ebm-papst 4414FNH - was 6 cm above reaction vessels. Reaction vessels were taped on top of stirring plate, using double sided white Scotch Mounting Squares. The reactions were checked with LCMS. Reaction conversion was calculated based on AUC (area under curve) of LCMS spectra at 254 nm. Reaction Conversion = AUC of desired product / (AUC of desired product + AUC of by-product(s) + AUC of unreacted starting material).

**General Scheme 5: Catalytic photoredox C(sp<sup>3</sup>)-C(sp<sup>2</sup>) cross-coupling of informer heterocyclic halides with THP-COOH in the present of photocatalyst 1 using Kessil Lamps**

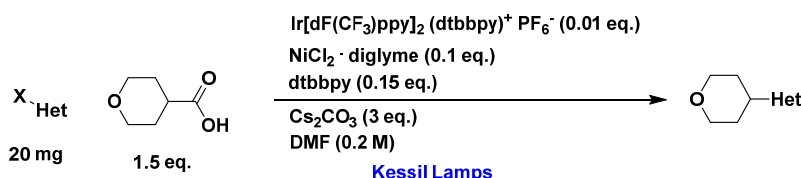

**General Procedure 5:**

A 2-dram vial equipped with a stir bar was charged with Aryl-halide (20 mg), tetrahydropyran-2-carboxylic acid (1.5 eq.), 4,4'-di-*tert*-butyl-2,2'-bipyridine (0.15 eq.), (Ir[dF(CF<sub>3</sub>)ppy]<sub>2</sub>(dtbbpy))PF<sub>6</sub> (0.01 eq.), nickel(II) chloride ethylene glycol di-methyl ether complex (0.1 eq.) and cesium carbonate (3 eq.). It was transferred into glove box. Anhydrous DMF (0.2 M) was added into the reaction mixture. It was capped and taken out of glove box. Each four or three reactions were irradiated with two Kessil Lamps for 16 h. Kessil lamps - Kessil KSH150B Grow Light Blue - were 7 cm away from reaction vessels. Cooling fan - electric fan from ebm-papst 4414FNH - was 6 cm above reaction vessels. Reaction vessels were taped on top of stirring plate, using double sided white Scotch Mounting Squares. The reactions were checked with LCMS. Reaction conversion was calculated based on AUC (area under curve) of LCMS spectra at 254 nm. Reaction Conversion = AUC of desired product / (AUC of desired product + AUC of by-product(s) + AUC of unreacted starting material).

**Table 2. Percentage of desired product in crude reaction mixture for catalytic photoredox C(sp<sup>3</sup>)-C(sp<sup>2</sup>) cross-electrophile coupling with 12 aliphatic halides using Integrated Photoreactor**

|                                                                                    |                                                                                   |                                                                                   |                                                                                   |                                                                                    |                                                                                     |                                                                                     |
|------------------------------------------------------------------------------------|-----------------------------------------------------------------------------------|-----------------------------------------------------------------------------------|-----------------------------------------------------------------------------------|------------------------------------------------------------------------------------|-------------------------------------------------------------------------------------|-------------------------------------------------------------------------------------|
|                                                                                    | 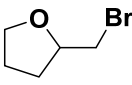 |  |  |  |  |  |
|   | 65                                                                                | 22                                                                                | 78                                                                                | 65                                                                                 | 53                                                                                  | 43                                                                                  |
|   | 63                                                                                | <10                                                                               | 74                                                                                | 62                                                                                 | 47                                                                                  | 33                                                                                  |
|                                                                                    |  |  |  |  |  |  |
|   | 52                                                                                | 38                                                                                | 45                                                                                | 48                                                                                 | 57                                                                                  | 40                                                                                  |
|  | 55                                                                                | 70                                                                                | 55                                                                                | 77                                                                                 | 22                                                                                  | 42                                                                                  |

**General Scheme 6: Catalytic photoredox C(sp<sup>3</sup>)-C(sp<sup>2</sup>) cross-coupling of heterocyclic halide (X6) with 12 aliphatic halides using Integrated Photoreactor**

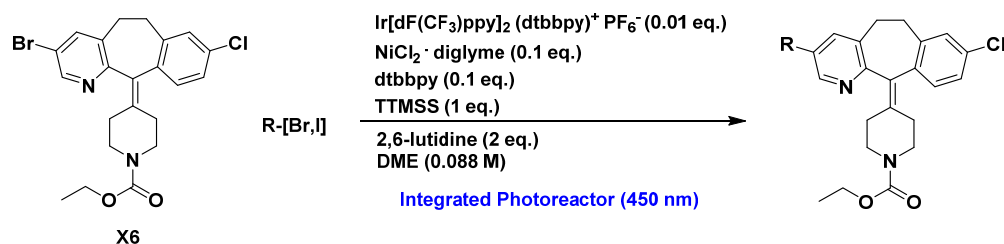

**General Procedure 6:**

A 2-dram vial equipped with a stir bar was charged with ethyl 4-(3-bromo-8-chloro-5H-benzo[5,6]cyclohepta[1,2-b]pyridin-11(6H)-ylidene)piperidine-1-carboxylate (20 mg, 0.043 mmol), 4,4'-di-*tert*-butyl-2,2'-bipyridine (0.1 eq.),  $\text{Ir}[\text{dF}(\text{CF}_3)\text{ppy}]_2(\text{dtbbpy})\text{PF}_6$  (0.01 eq.), and nickel(II) chloride ethylene glycol di-methyl ether complex (0.1 eq.). It was transferred into glove box. Anhydrous 1,2-dimethoxyethane (0.088 M), alkyl-halide (1.5 eq.), TTMS (1 eq.), and 2,6-lutidine (2 eq.) were added into the reaction mixture. It was capped and taken out of glove box. Irradiated with Integrated Photoreactor, Royal Blue (450 nm) LED light for 1 h, with 100% LED light power. Stir rate was 1000 rpm. Fan rate was 4700 rpm. The reaction was checked with LCMS. If the reaction was not complete, the reaction mixture would be irradiated with Integrated Photoreactor for 1 more hour. The reactions were checked with LCMS. Reaction conversion was calculated based on AUC (area under curve) of LCMS spectra at 254 nm. Reaction Conversion = AUC of desired product / (AUC of desired product + AUC of by-product(s) + AUC of unreacted starting material). The following work-up procedure was applied. Reaction mixture was partitioned between EtOAc (2 mL) and water (0.5 mL). Aqueous layer was extracted with EtOAc (2 mL). The combined organic layers was concentrated with GeneVac to dryness. The residue was purified with semi-preparative reverse phase HPLC system, to afford the desired product. It

could be further purified with prep. TLC plate (in 60% EtOAc/heptane or 5% MeOH/EtOAc), followed by micro-scale reverse phase HPLC purification.

**General Scheme 7: Catalytic photoredox C(sp<sup>3</sup>)-C(sp<sup>2</sup>) cross-coupling of heterocyclic halide (X13) with 12 aliphatic halides using Integrated Photoreactor**

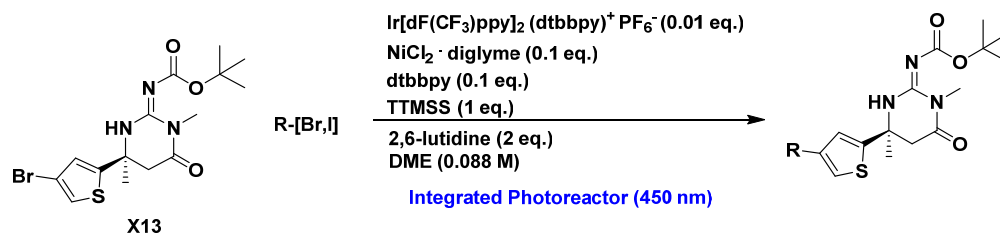

**General Procedure 7:**

A 2-dram vial equipped with a stir bar was charged with *tert*-butyl (*S,Z*)-(4-(4-bromothiophen-2-yl)-1,4-dimethyl-6-oxotetrahydropyrimidin-2(1*H*)-ylidene)carbamate (20 mg, 0.05 mmol), 4,4'-di-*tert*-butyl-2,2'-bipyridine (0.1 eq.),  $\text{Ir}[\text{dF}(\text{CF}_3)\text{ppy}]_2(\text{dtbbpy})\text{PF}_6$  (0.01 eq.), and nickel(II) chloride ethylene glycol di-methyl ether complex (0.1 eq.). It was transferred into glove box. Anhydrous 1,2-dimethoxyethane (0.088 M), alkyl-halide (1.5 eq.), TTMSS (1 eq.) and 2,6-lutidine (2 eq.) were added into the reaction mixture. It was capped and taken out of glove box. Irradiated with Integrated Photoreactor, Royal Blue (450 nm) LED light for 1 h, with 100% LED light power. Stir rate was 1000 rpm. Fan rate was 4700 rpm. The reaction was checked with LCMS. If the reaction was not complete, the reaction mixture would be irradiated with Integrated Photoreactor for 1 more hour. The reactions were checked with LCMS. Reaction conversion was calculated based on AUC (area under curve) of LC/MS spectra at 254 nm. Reaction Conversion = AUC of desired product / (AUC of desired product + AUC of by-product(s) + AUC of unreacted starting material). The following work-up procedure was applied. Reaction mixture was partitioned between EtOAc (2 mL) and water (0.5 mL). Aqueous layer was extracted with EtOAc (2 mL). The combined organic layers was concentrated with GeneVac to dryness. The residue was purified with semi-preparative reverse phase HPLC system, to afford the desired product. To obtain good NMR spectra, the residue could be further purified with prep. TLC and then micro-scale reverse phase HPLC system.

**Examples:**

**methyl 2-(2,3-dioxo-9-(tetrahydro-2*H*-pyran-4-yl)-2,3,6,7-tetrahydro-1*H*,5*H*-pyrido[1,2,3-*de*]quinoxalin-5-yl)acetate (1)**

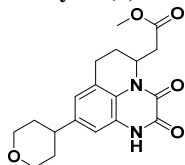

General procedure 3 was followed where **X1**, methyl 2-(9-bromo-2,3-dioxo-2,3,6,7-tetrahydro-1*H*, 5*H*-pyrido[1,2,3-*de*]quinoxalin-5-yl)acetate, was used as aryl-halide. Reaction mixture was partitioned between EtOAc (2 mL) and water (0.5 mL). Aqueous layer was extracted with EtOAc (2 mL). The combined organic layers was concentrated with GeneVac to dryness. General procedure 2 was also applied. The crude materials were combined and purified with prep. TLC plate (in 5% MeOH/EtOAc).  $R_f = 0.26$  (in 5% MeOH/EtOAc). The band containing desired product was scratched off, stirred with 5% MeOH/EtOAc (30 mL) for 0.5 h. Then it was filtered and the filtrate was concentrated with GeneVac. The residue was further purified with Mass Directed HPLC system under TFA condition (0.16% TFA in both  $\text{CH}_3\text{CN}$  and  $\text{H}_2\text{O}$ , 12 min. run, 25 mL/min., 10 – 40%  $\text{CH}_3\text{CN}$ ), to afford the title compound **1**, 10.5 mg (98% pure), as off-white solid.  $^1\text{H NMR}$  (500 MHz,  $\text{DMSO}-d_6$ )  $\delta$  11.96 (s, 1H), 6.93 (s, 1H), 6.90 – 6.88 (m, 1H), 5.13 – 5.07 (m, 1H), 3.95 (dd,  $J = 11.0, 3.5$  Hz, 2H), 3.63 (s, 3H), 3.47 – 3.40 (m, 2H), 2.99 – 2.90 (m, 1H), 2.81 – 2.69 (m, 2H), 2.62 (m, 2H), 2.15 – 2.09 (m, 1H), 1.91 (tt,  $J = 13.8, 4.6$  Hz, 1H), 1.72 – 1.56 (m, 4H).  $^{13}\text{C NMR}$  (126 MHz,  $\text{DMSO}-d_6$ )  $\delta$  171.21, 154.47, 154.14, 141.46, 141.46, 126.05, 124.85, 122.17, 121.34, 111.84, 67.72, 52.14, 47.48, 40.42, 35.42, 34.04, 23.31, 21.63. Chemical Formula of  $[\text{M}+\text{H}]^+$ :  $\text{C}_{19}\text{H}_{23}\text{N}_2\text{O}_5^+$ ; Exact Mass (calculated): 359.1601; **HRMS (ESI<sup>+</sup>)** (found): 359.1616.

**methyl 2-(9-(1,2-dimethoxyethyl)-2,3-dioxo-2,3,6,7-tetrahydro-1*H*, 5*H*-pyrido[1,2,3-*de*]quinoxalin-5-yl)acetate (2)**

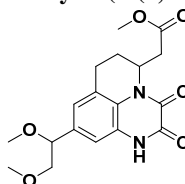

During the preparation of compound **1**, a by-product, methyl 2-(9-(1,2-dimethoxyethyl)-2,3-dioxo-2,3,6,7-tetrahydro-1*H*, 5*H*-pyrido[1,2,3-*de*]quinoxalin-5-yl)acetate, compound **2**, 1.6 mg (85% pure), as light brown solid, was also isolated. It was formed in General procedure 3 where DME was used as solvent.  $^1\text{H NMR}$  (500 MHz, Chloroform-*d*)  $\delta$  7.11 (s, 1H), 7.07 (s, 1H), 5.46 – 5.41 (m, 1H), 4.38 (dd,  $J = 7.3, 3.9$  Hz, 1H), 3.73 (s, 3H), 3.59 (dd,  $J = 10.0, 7.7$  Hz, 1H), 3.46 (dd,  $J = 10.4, 4.0$  Hz, 1H), 3.39 (d,  $J =$



0.7 Hz, 3H), 3.30 (s, 3H), 3.09 – 2.98 (m, 1H), 2.92 – 2.84 (m, 1H), 2.82 (dd,  $J = 15.2, 4.9$  Hz, 1H), 2.59 (dd,  $J = 14.9, 9.5$  Hz, 1H), 2.36 – 2.31 (m, 1H), 2.03 (ddt,  $J = 14.1, 9.6, 4.7$  Hz, 1H).  $^{13}\text{C}$  NMR (126 MHz, Chloroform- $d$ )  $\delta$  170.45, 155.45, 154.01, 135.66, 125.12, 124.44, 123.30, 122.42, 113.56, 81.80, 76.51, 59.26, 57.20, 52.16, 48.05, 35.26, 23.15, 21.79. LCMS  $R_T = 1.26$  min. (5 min. run); Chemical Formula of  $[\text{M}+\text{H}]^+$ :  $\text{C}_{18}\text{H}_{23}\text{N}_2\text{O}_6^+$ ; Exact Mass (calculated): 363.16; **Exact Mass (ESI $^+$ )** (found): 363.17.

**ethyl 5-methyl-6-oxo-8-(tetrahydro-2H-pyran-4-yl)-5,6-dihydro-4H-benzo[f]imidazo[1,5-a][1,4]diazepine-3-carboxylate (3)**

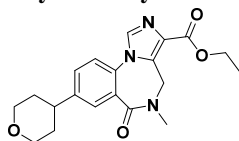

General procedure 3 was followed where **X2**, ethyl 8-bromo-5-methyl-6-oxo-5,6-dihydro-4H-benzo[f]imidazo[1,5-a][1,4]diazepine-3-carboxylate, was used as aryl-halide. Reaction mixture was partitioned between EtOAc (2 mL) and water (0.5 mL). Aqueous layer was extracted with EtOAc (2 mL). The combined organic layers was concentrated with GeneVac to dryness. General procedure 1, 2 and 4 were also applied. The crude materials were combined and purified with Mass Directed HPLC system under TFA condition (0.16% TFA in both  $\text{CH}_3\text{CN}$  and  $\text{H}_2\text{O}$ , 12 min. run, 25 mL/min., 10 – 40%  $\text{CH}_3\text{CN}$ ), to afford the title compound **3** as TFA salt, 58 mg (100% pure), colorless oil.  $^1\text{H}$  NMR (500 MHz,  $\text{DMSO}-d_6$ )  $\delta$  8.39 (d,  $J = 2.1$  Hz, 1H), 7.78 (d,  $J = 1.5$  Hz, 1H), 7.71 – 7.65 (m, 2H), 4.96 (s, 1H), 4.48 (s, 1H), 4.33 (s, 2H), 3.98 (dd,  $J = 10.8, 3.5$  Hz, 2H), 3.47 (td,  $J = 11.4, 2.3$  Hz, 2H), 3.11 (s, 3H), 2.95 (ddt,  $J = 11.4, 8.3, 4.1$  Hz, 1H), 1.79 – 1.67 (m, 4H), 1.35 (t,  $J = 7.1$  Hz, 3H).  $^{13}\text{C}$  NMR (126 MHz,  $\text{DMSO}-d_6$ )  $\delta$  166.21, 162.72, 146.44, 136.83, 135.87, 131.52, 130.50, 130.17, 128.93, 127.78, 123.45, 67.69, 60.59, 42.48, 40.44, 35.59, 33.65, 14.70. Chemical Formula of  $[\text{M}+\text{H}]^+$ :  $\text{C}_{20}\text{H}_{24}\text{N}_3\text{O}_4^+$ ; Exact Mass (calculated): 370.1761; **HRMS (ESI $^+$ )** (found): 370.1772.

**5,5-dimethyl-4-(4-(methylsulfonyl)phenyl)-3-((5-(tetrahydro-2H-pyran-4-yl)pyridine-2-yl)oxy)furan-2(5H)-one (4)**

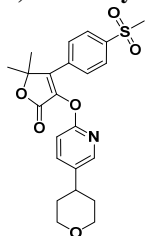

General procedure 2 was followed where **X3**, 3-((5-bromopyridin-2-yl)oxy)-5,5-dimethyl-4-(4-(methylsulfonyl)phenyl)furan-2(5H)-one, was used as aryl-halide. Reaction mixture was partitioned between EtOAc (2 mL) and water (0.5 mL). Aqueous layer was extracted with EtOAc (2 mL). The combined organic layers was concentrated with GeneVac to dryness. General procedure 1, 3 and 4 were also applied. The crude materials were combined and purified with Mass Directed HPLC system under TFA condition (0.16% TFA in both  $\text{CH}_3\text{CN}$  and  $\text{H}_2\text{O}$ , 12 min. run, 25 mL/min., 25 – 55%  $\text{CH}_3\text{CN}$ ), to afford the title compound as TFA salt, 8.4 mg (94% pure), light yellow oil. It was further purified with prep. TLC plate (in 2% MeOH/EtOAc).  $R_f = 0.54$  (in 2% MeOH/EtOAc). The band containing desired product was scratched off, stirred with 2% MeOH/EtOAc (30 mL) for 0.5 h. Then it was filtered and the filtrate was concentrated with GeneVac. Followed by micro-scale HPLC under TFA condition (0.16% TFA in both  $\text{CH}_3\text{CN}$  and  $\text{H}_2\text{O}$ , 12 min. run, 8 mL/min., 25 – 55%  $\text{CH}_3\text{CN}$ ), to afford the title compound **4** as TFA salt, less than 1 mg (95% pure), colorless oil.  $^1\text{H}$  NMR (500 MHz,  $\text{DMSO}-d_6$ )  $\delta$  8.08 (d,  $J = 2.4$  Hz, 1H), 8.04 – 8.01 (m, 2H), 7.88 – 7.86 (m, 2H), 7.80 (dd,  $J = 8.5, 2.5$  Hz, 1H), 7.11 (d,  $J = 8.5$  Hz, 1H), 3.97 – 3.93 (m, 2H), 3.42 (td,  $J = 11.2, 3.8$  Hz, 2H), 3.25 (s, 3H), 2.81 (tt,  $J = 10.8, 6.1$  Hz, 1H), 1.72 (s, 6H), 1.68 (m, 4H). Chemical Formula of  $[\text{M}+\text{H}]^+$ :  $\text{C}_{23}\text{H}_{26}\text{NO}_6\text{S}^+$ ; Exact Mass (calculated): 444.1475; **HRMS (ESI $^+$ )** (found): 444.1491. NOTE: Due to low amount of the material,  $^1\text{H}$  NMR spectra showed peaks of  $\text{NH}_4\text{OH}$  which was induced during HPLC fraction drying down with GeneVac system.

**1-(tert-butyl) 2-methyl (2S,4R)-4-((4-fluoro-7-(tetrahydro-2H-pyran-4-yl)isoindoline-2-carbonyl)oxy)pyrrolidine-1,2-dicarboxylate (5)**

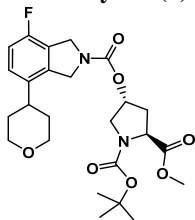

General procedure 2 was followed where **X4**, 1-(tert-butyl) 2-methyl (2S,4R)-4-((4-bromo-7-fluoroisoindoline-2-carbonyl)oxy)pyrrolidine-1,2-dicarboxylate, was used as aryl-halide. Reaction mixture was partitioned between EtOAc (2 mL) and water (0.5 mL). Aqueous layer was extracted with EtOAc (2 mL). The combined organic layers was concentrated with GeneVac to dryness. General procedure 1, 3 and 4 were also applied. The crude materials were combined and purified with Mass Directed HPLC system under  $\text{NH}_4\text{OH}$  condition (0.16%  $\text{NH}_4\text{OH}$  in both  $\text{CH}_3\text{CN}$  and  $\text{H}_2\text{O}$ , 12 min. run, 25 mL/min., 25 – 55%  $\text{CH}_3\text{CN}$ ), to afford 48 mg (56% pure) of light brown oil. It was further purified with prep. TLC plate (in 2% MeOH/EtOAc).  $R_f = 0.61$  (in 2%

MeOH/EtOAc). The band containing desired product was scratched off, stirred with 2% MeOH/EtOAc (30 mL) for 0.5 h. Then it was filtered and the filtrate was concentrated with GeneVac. Followed by Mass Directed HPLC system under TFA condition (0.16% TFA in both CH<sub>3</sub>CN and H<sub>2</sub>O, 12 min. run, 25 mL/min., 40 – 75% CH<sub>3</sub>CN), to afford the title compound **5**, 3.4 mg (95% pure), light brown oil. <sup>1</sup>H NMR (500 MHz, DMSO-*d*<sub>6</sub>) δ 7.29 – 7.24 (m, 1H), 7.12 (t, *J* = 8.8 Hz, 1H), 5.20 (s, 1H), 4.79 – 4.66 (m, 4H), 4.38 (dq, *J* = 16.9, 8.1 Hz, 1H), 3.94 (d, *J* = 10.1 Hz, 2H), 3.70 (s, 2H), 3.69 – 3.66 (m, 1H), 3.66 – 3.51 (m, 2H), 3.46 (t, *J* = 11.0 Hz, 2H), 2.80 – 2.64 (m, 1H), 2.45 (m, 1H), 2.20 (m, 1H), 1.74 – 1.60 (m, 4H), 1.39 (m, 9H). <sup>13</sup>C NMR (126 MHz, DMSO-*d*<sub>6</sub>) δ 173.26, 154.97, 153.78, 138.04, 137.24, 127.46, 123.58, 114.93, 79.94, 73.21, 67.77, 58.01, 52.60, 52.49, 51.91, 49.49, 37.89, 36.58, 33.06, 28.30. Chemical Formula of [M+H]<sup>+</sup>: C<sub>25</sub>H<sub>34</sub>FN<sub>2</sub>O<sub>7</sub><sup>+</sup>; Exact Mass (calculated): 493.2345; HRMS (ESI<sup>+</sup>) (found): 493.2367.

**benzyl (R)-2-(5-(tetrahydro-2H-pyran-4-yl)-1H-indole-3-carbonyl)pyrrolidine-1-carboxylate (6)**

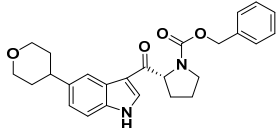

General procedure 3 was followed where **X5**, benzyl (R)-2-(5-bromo-1H-indole-3-carbonyl)pyrrolidine-1-carboxylate, was used as aryl-halide. Reaction mixture was partitioned between EtOAc (2 mL) and water (0.5 mL). Aqueous layer was extracted with EtOAc (2 mL). The combined organic layers was concentrated with GeneVac to dryness. General procedure 2 was also applied. The crude materials were combined and purified with Mass Directed HPLC system under TFA condition (0.16% TFA in both CH<sub>3</sub>CN and H<sub>2</sub>O, 8 min. run, 25 mL/min., 30 – 65% CH<sub>3</sub>CN), to afford 34.7 mg (56% pure) of off-white solid. It was further purified with prep. TLC plate (in 5% MeOH/EtOAc). R<sub>f</sub> = 0.60 (in 5% MeOH/EtOAc). The band containing desired product was scratched off, stirred with 5% MeOH/EtOAc (30 mL) for 0.5 h. Then it was filtered and the filtrate was concentrated with GeneVac. Followed by micro-scale HPLC under NH<sub>4</sub>OH condition (0.16% NH<sub>4</sub>OH in both CH<sub>3</sub>CN and H<sub>2</sub>O, 6 min. run, 8 mL/min., 25 – 60% CH<sub>3</sub>CN), to afford the title compound **6**, 1.4 mg (95% pure), off-white solid. <sup>1</sup>H NMR (500 MHz, DMSO-*d*<sub>6</sub>) δ 11.93 (d, *J* = 8.1 Hz, 1H), 8.41 (dd, *J* = 11.1, 3.1 Hz, 1H), 8.08 (d, *J* = 22.8 Hz, 1H), 7.42 (d, *J* = 8.4 Hz, 1H), 7.41 – 7.37 (m, 2H), 7.18 – 7.14 (m, 1H), 7.12 – 7.08 (m, 2H), 7.04 – 6.99 (m, 1H), 5.21 (ddd, *J* = 27.0, 8.6, 3.3 Hz, 1H), 5.12 – 5.04 (m, 1H), 5.01 – 4.90 (m, 1H), 3.98 (m, 2H), 3.58 – 3.51 (m, 2H), 3.48 (ddt, *J* = 14.4, 6.9, 3.3 Hz, 2H), 2.86 (ddq, *J* = 15.6, 9.6, 4.9 Hz, 1H), 2.46 – 2.28 (m, 1H), 1.89 (qq, *J* = 12.6, 5.8 Hz, 3H), 1.79 – 1.65 (m, 4H). Chemical Formula of [M+H]<sup>+</sup>: C<sub>26</sub>H<sub>29</sub>N<sub>2</sub>O<sub>4</sub><sup>+</sup>; Exact Mass (calculated): 433.2122; HRMS (ESI<sup>+</sup>) (found): 433.2129.

**ethyl 4-(8-chloro-3-(tetrahydro-2H-pyran-4-yl)-5,6-dihydro-11H-benzo[5,6]cyclohepta[1,2-*b*]pyridine-11-ylidene)piperidine-1-carboxylate (7)**

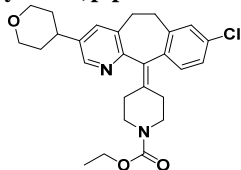

General procedure 6 was followed where 4-bromotetrahydro-2H-pyran was used as alkyl-halide. The reaction mixture was purified with prep. TLC plate (in 5% MeOH/EtOAc). R<sub>f</sub> = 0.31 (in 5% MeOH/EtOAc). The band containing desired product was scratched off, stirred with 5% MeOH/EtOAc (30 mL) for 0.5 h. Then it was filtered and the filtrate was concentrated with GeneVac. The residue was further purified with SFC (supercritical fluid chromatography) - Instrument: Thar 80 SFC; Column: Chiralpak AS-H, 5μm, 21 x 250mm; Conditions: 20% MeOH/ACN 1:1 + 0.2% DIPA (diisopropylamine) @ 50 g/min, 120 bar, 40°C, 210 nm. The fraction containing desired product was concentrated with rotovap, which was purified with Mass Directed HPLC system under TFA condition (0.16% TFA in both CH<sub>3</sub>CN and H<sub>2</sub>O, 12 min. run, 25 mL/min., 20 – 55% CH<sub>3</sub>CN), to afford the title compound **7** as TFA salt, 6.5 mg, light yellow oil. <sup>1</sup>H NMR (500 MHz, DMSO-*d*<sub>6</sub>) δ 8.54 (s, 1H), 8.21 (s, 1H), 7.43 (d, *J* = 1.9 Hz, 1H), 7.32 (dd, *J* = 8.2, 2.0 Hz, 1H), 7.14 (d, *J* = 8.2 Hz, 1H), 4.06 (q, *J* = 7.0 Hz, 2H), 3.99 – 3.94 (m, 2H), 3.84 – 3.77 (m, 1H), 3.70 (dt, *J* = 10.2, 4.7 Hz, 1H), 3.43 (m, 3H), 3.36 (dq, *J* = 10.4, 5.1 Hz, 1H), 3.13 (s, 2H), 2.99 (ddt, *J* = 21.7, 15.9, 8.2 Hz, 2H), 2.90 (dt, *J* = 15.1, 5.4 Hz, 1H), 2.37 (ddd, *J* = 14.2, 9.6, 4.7 Hz, 1H), 2.27 (m, 2H), 2.16 (dt, *J* = 14.0, 4.0 Hz, 1H), 1.74 (m, 4H), 1.19 (t, *J* = 7.1 Hz, 3H). <sup>13</sup>C NMR (126 MHz, DMSO-*d*<sub>6</sub>) δ 154.98, 143.15, 140.54, 139.82, 137.13, 136.90, 133.08, 130.88, 129.57, 126.78, 67.47, 61.27, 44.18, 38.05, 32.81, 30.73, 30.22, 15.07. Chemical Formula of [M+H]<sup>+</sup>: C<sub>27</sub>H<sub>32</sub>ClN<sub>2</sub>O<sub>3</sub><sup>+</sup>; Exact Mass (calculated): 467.2096; HRMS (ESI<sup>+</sup>) (found): 467.2110.

**1-benzyl 2-methyl (2S, 4R)-4-((4-(tetrahydro-2H-pyran-4-yl)isoindoline-2-carbonyl)oxy)pyrrolidine-1,2-dicarboxylate (8)**

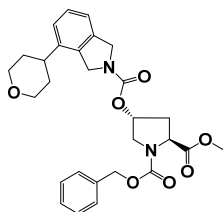

General procedure 3 was followed where **X8**, 1-benzyl 2-methyl (2*S*,4*R*)-4-((4-bromoisindoline-2-carbonyl)oxy)pyrrolidine-1,2-dicarboxylate, was used as aryl-halide. Reaction mixture was partitioned between EtOAc (2 mL) and water (0.5 mL). Aqueous layer was extracted with EtOAc (2 mL). The combined organic layers were concentrated with GeneVac to dryness. General procedure 2 was also applied. The crude materials were combined and purified with Mass Directed HPLC system under TFA condition (0.16% TFA in both CH<sub>3</sub>CN and H<sub>2</sub>O, 8 min. run, 25 mL/min., 40 – 75% CH<sub>3</sub>CN), to afford 27.7 mg (50% pure) of light brown oil. It was further purified with prep. TLC plate (in 5% MeOH/EtOAc). *R<sub>f</sub>* = 0.70 (in 5% MeOH/EtOAc). The band containing desired product was scratched off, stirred with 5% MeOH/EtOAc (30 mL) for 0.5 h. Then it was filtered and the filtrate was concentrated with GeneVac. Followed by Mass Directed HPLC system under TFA condition (0.16% TFA in both CH<sub>3</sub>CN and H<sub>2</sub>O, 12 min. run, 25 mL/min., 40 – 70% CH<sub>3</sub>CN), to afford the title compound **8**, 9.7 mg (100% pure), colorless oil. <sup>1</sup>H NMR (500 MHz, DMSO-*d*<sub>6</sub>) δ 7.33 (m, 6H), 7.22 – 7.15 (m, 2H), 5.22 (s, 1H), 5.16 – 4.98 (m, 2H), 4.65 (m, 4H), 4.55 – 4.42 (m, 1H), 3.97 – 3.91 (m, 2H), 3.80 – 3.55 (m, 5H), 3.51 – 3.40 (m, 2H), 2.74 (m, 1H), 2.50 – 2.41 (m, 1H), 2.24 (m, 1H), 1.74 – 1.60 (m, 4H). <sup>13</sup>C NMR (126 MHz, DMSO-*d*<sub>6</sub>) δ 172.90, 154.53, 153.93, 141.03, 137.23, 136.95, 134.66, 128.80, 127.84, 124.83, 120.94, 73.67, 67.82, 66.75, 57.71, 53.17, 52.97, 52.58, 51.51, 38.43, 35.75, 32.98. Chemical Formula of [M+H]<sup>+</sup>: C<sub>28</sub>H<sub>33</sub>N<sub>2</sub>O<sub>7</sub><sup>+</sup>; Exact Mass (calculated): 509.2282; HRMS (ESI<sup>+</sup>) (found): 509.2297.

**1-ethyl-8-(((1*R*,2*R*)-2-hydroxycyclopentyl)amino)-3-(2-hydroxyethyl)-7-(4-methoxy-3-(tetrahydro-2*H*-pyran-4-yl)benzyl)-3,7-dihydro-1*H*-purine-2,6-dione (**9**)**

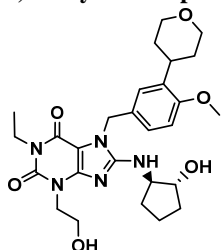

General procedure 3 was followed where **X12**, 7-(3-bromo-4-methoxybenzyl)-1-ethyl-8-(((1*R*,2*R*)-2-hydroxycyclopentyl)amino)-3-(3-hydroxyethyl)-3,7-dihydro-1*H*-purine-2,6-dione, was used as aryl-halide. Reaction mixture was partitioned between EtOAc (2 mL) and water (0.5 mL). Aqueous layer was extracted with EtOAc (2 mL). The combined organic layers were concentrated with GeneVac to dryness. General procedure 4 was also applied. The crude materials were combined and purified with Mass Directed HPLC system under TFA condition (0.16% TFA in both CH<sub>3</sub>CN and H<sub>2</sub>O, 15 min. run, 25 mL/min., 13 – 48% CH<sub>3</sub>CN), to afford 12.5 mg (55% pure) of off-white solid. It was further purified with prep. TLC plate (in 5% MeOH/EtOAc). *R<sub>f</sub>* = 0.36 (in 5% MeOH/EtOAc). The band containing desired product was scratched off, stirred with 5% MeOH/EtOAc (30 mL) for 0.5 h. Then it was filtered and the filtrate was concentrated with GeneVac. Followed by micro-scale HPLC under NH<sub>4</sub>OH condition (0.16% NH<sub>4</sub>OH in both CH<sub>3</sub>CN and H<sub>2</sub>O, 12 min. run, 8 mL/min., 15 – 36% CH<sub>3</sub>CN), to afford the title compound **9**, less than 1 mg (100% pure), off-white solid. <sup>1</sup>H NMR (500 MHz, DMSO-*d*<sub>6</sub>) δ 7.31 (d, *J* = 2.1 Hz, 1H), 7.14 (dd, *J* = 8.4, 2.1 Hz, 1H), 6.97 (d, *J* = 6.7 Hz, 1H), 6.90 (d, *J* = 8.5 Hz, 1H), 5.24 (s, 2H), 4.79 (t, *J* = 5.8 Hz, 1H), 4.76 (d, *J* = 4.2 Hz, 1H), 3.98 (p, *J* = 6.8, 6.3 Hz, 3H), 3.94 – 3.85 (m, 5H), 3.75 (s, 3H), 3.62 (q, *J* = 6.4 Hz, 2H), 3.42 (td, *J* = 11.2, 5.3 Hz, 2H), 3.12 – 3.02 (m, 1H), 2.06 (td, *J* = 13.3, 7.8 Hz, 1H), 1.92 – 1.81 (m, 1H), 1.67 (m, 2H), 1.58 (m, 4H), 1.53 – 1.45 (m, 2H), 1.10 (t, *J* = 7.0 Hz, 3H). Chemical Formula of [M+H]<sup>+</sup>: C<sub>27</sub>H<sub>38</sub>N<sub>5</sub>O<sub>6</sub><sup>+</sup>; Exact Mass (calculated): 528.2817; HRMS (ESI<sup>+</sup>) (found): 528.2839.

**(*R*)-5-(((1*H*-1,2,3-triazol-1-yl)methyl)-3-(3-fluoro-4-(tetrahydro-2*H*-pyran-4-yl)phenyl)oxazolidin-2-one (**10**)**

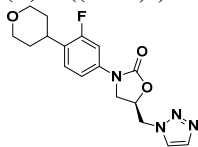

General procedure 2 was followed where **X14**, (*R*)-5-(((1*H*-1,2,3-triazol-1-yl)methyl)-3-(3-fluoro-4-iodophenyl)oxazolidin-2-one, was used as aryl-halide. Reaction mixture was partitioned between EtOAc (2 mL) and water (0.5 mL). Aqueous layer was extracted with EtOAc (2 mL). The combined organic layers were concentrated with GeneVac to dryness. The residue was purified with Mass Directed HPLC system under TFA condition (0.16% TFA in both CH<sub>3</sub>CN and H<sub>2</sub>O, 8 min. run, 25 mL/min., 15 – 50% CH<sub>3</sub>CN), to afford 2 mg (57% pure) of brown oil. It was further purified with micro-scale HPLC under NH<sub>4</sub>OH condition (0.16% NH<sub>4</sub>OH in both CH<sub>3</sub>CN and H<sub>2</sub>O, 6 min. run, 8 mL/min., 11 – 45% CH<sub>3</sub>CN), to afford the title compound **10**, 0.4 mg (100% pure), light yellow oil. <sup>1</sup>H NMR (500 MHz, DMSO-*d*<sub>6</sub>) δ 8.18 (d, *J* = 0.8 Hz, 1H), 7.77 (d, *J* = 0.7 Hz, 1H), 7.42 – 7.32 (m, 2H), 7.21 (dd, *J* = 8.5,

2.2 Hz, 1H), 5.15 (dq,  $J = 10.6, 5.3$  Hz, 1H), 4.84 (d,  $J = 5.1$  Hz, 2H), 4.24 (t,  $J = 9.2$  Hz, 1H), 3.95 (dd,  $J = 10.9, 3.8$  Hz, 2H), 3.89 (dd,  $J = 9.4, 5.7$  Hz, 1H), 3.46 (td,  $J = 11.6, 1.9$  Hz, 2H), 3.02 (tt,  $J = 11.9, 3.8$  Hz, 1H), 1.72 (qd,  $J = 12.4, 4.1$  Hz, 2H), 1.64 (d,  $J = 10.9$  Hz, 2H). Chemical Formula of  $[M+H]^+$ :  $C_{17}H_{20}FN_4O_3^+$ ; Exact Mass (calculated): 347.1514; **HRMS (ESI<sup>+</sup>)** (found): 347.1523.

***N*-(*tert*-butyl)-4'-((4-oxo-2-propyl-6-(tetrahydro-2*H*-pyran-4-yl)quinazolin-3(4*H*)-yl)methyl)-[1,1'-biphenyl]-2-sulfonamide (11)**

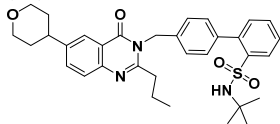

General procedure 3 was followed where **X15**, *N*-(*tert*-butyl)-4'-((6-iodo-4-oxo-2-propylquinazolin-3(4*H*)-yl)methyl)-[1,1'-biphenyl]-2-sulfonamide, was used as aryl-halide. Reaction mixture was partitioned between EtOAc (2 mL) and water (0.5 mL). Aqueous layer was extracted with EtOAc (2 mL). The combined organic layers was concentrated with GeneVac to dryness. The residue was purified with prep. TLC plate (in 5% MeOH/EtOAc).  $R_f = 0.74$  (in 5% MeOH/EtOAc). The band containing desired product was scratched off, stirred with 5% MeOH/EtOAc (30 mL) for 0.5 h. Then it was filtered and the filtrate was concentrated with GeneVac. The residue was further purified with micro-scale HPLC under  $NH_4OH$  condition (0.16%  $NH_4OH$  in both  $CH_3CN$  and  $H_2O$ , 12 min. run, 8 mL/min., 40 – 75%  $CH_3CN$ ), to afford the title compound **11**, 0.2 mg (100% pure), off-white solid. **<sup>1</sup>H NMR** (500 MHz,  $DMSO-d_6$ )  $\delta$  8.04 (dd,  $J = 7.9, 1.2$  Hz, 1H), 8.02 (d,  $J = 2.0$  Hz, 1H), 7.78 (dd,  $J = 8.5, 2.1$  Hz, 1H), 7.66 – 7.60 (m, 2H), 7.56 (td,  $J = 7.7, 1.4$  Hz, 1H), 7.39 (d,  $J = 8.3$  Hz, 2H), 7.30 (dd,  $J = 7.6, 1.3$  Hz, 1H), 7.21 (d,  $J = 8.2$  Hz, 2H), 6.55 (s, 1H), 5.46 (s, 2H), 3.99 (dd,  $J = 10.8, 3.6$  Hz, 2H), 3.48 (td,  $J = 11.5, 2.1$  Hz, 2H), 3.02 – 2.93 (m, 1H), 2.77 (t,  $J = 7.4$  Hz, 2H), 1.83 – 1.66 (m, 6H), 0.96 (s, 9H), 0.94 (t,  $J = 7.4$  Hz, 3H). Chemical Formula of  $[M+H]^+$ :  $C_{33}H_{40}N_3O_4S^+$ ; Exact Mass (calculated): 574.2734; **HRMS (ESI<sup>+</sup>)** (found): 574.2753.

**methyl 3-(3-(*tert*-butylthio)-5-(quinolin-2-ylmethoxy)-1-(4-(tetrahydro-2*H*-pyran-4-yl)benzyl)-1*H*-indol-2-yl)-2,2-dimethylpropanoate (12)**

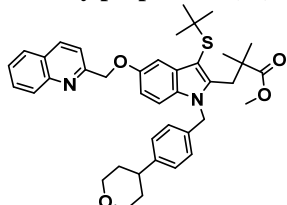

General procedure 3 was followed where **X18**, methyl 3-(3-(*tert*-butylthio)-1-(4-chlorobenzyl)-5-(quinolin-2-ylmethoxy)-1*H*-indol-2-yl)-2,2-dimethylpropanoate, was used as aryl-halide. Reaction mixture was partitioned between EtOAc (2 mL) and water (0.5 mL). Aqueous layer was extracted with EtOAc (2 mL). The combined organic layers was concentrated with GeneVac to dryness. General procedure 4 was also applied. The crude materials were combined and purified with Mass Directed HPLC system under TFA condition (0.16% TFA in both  $CH_3CN$  and  $H_2O$ , 8 min. run, 25 mL/min., 45 – 80%  $CH_3CN$ ), to afford 4 mg (45% pure) of light yellow oil. It was further purified with micro-scale HPLC under  $NH_4OH$  condition (0.16%  $NH_4OH$  in both  $CH_3CN$  and  $H_2O$ , 12 min. run, 8 mL/min., 55 – 80%  $CH_3CN$ ), to afford the title compound **12**, 0.4 mg (100% pure), off-white solid. **<sup>1</sup>H NMR** (500 MHz,  $DMSO-d_6$ )  $\delta$  8.45 (d,  $J = 8.5$  Hz, 1H), 8.09 (d,  $J = 8.5$  Hz, 1H), 8.02 (d,  $J = 8.3$  Hz, 1H), 7.85 – 7.82 (m, 1H), 7.72 (d,  $J = 8.5$  Hz, 1H), 7.65 (t,  $J = 7.5$  Hz, 1H), 7.29 (d,  $J = 8.9$  Hz, 1H), 7.15 – 7.11 (m, 3H), 6.89 (dd,  $J = 8.9, 2.5$  Hz, 1H), 6.76 (d,  $J = 8.2$  Hz, 2H), 5.43 (s, 2H), 5.41 (s, 2H), 3.90 (dd,  $J = 10.4, 2.9$  Hz, 2H), 3.60 (s, 3H), 3.38 (td,  $J = 11.3, 3.2$  Hz, 2H), 3.21 (s, 2H), 2.68 (td,  $J = 10.8, 4.8$  Hz, 1H), 1.60 (m, 4H), 1.13 (s, 6H), 1.01 (s, 9H). Chemical Formula of  $[M+H]^+$ :  $C_{40}H_{47}N_2O_4S^+$ ; Exact Mass (calculated): 651.3251; **HRMS (ESI<sup>+</sup>)** (found): 651.3273.

**ethyl 4-(8-chloro-3-((tetrahydrofuran-2-yl)methyl)-5,6-dihydro-11*H*-benzo[5,6]cyclohepta[1,2-*b*]pyridine-11-ylidene)piperidine-1-carboxylate (13)**

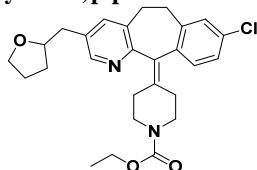

General procedure 6 was followed where 2-(bromomethyl)tetrahydrofuran was used as alkyl-halide. It was purified with Mass Directed HPLC system under TFA condition (0.16% TFA in both  $CH_3CN$  and  $H_2O$ , 12 min. run, 25 mL/min., 25 – 60%  $CH_3CN$ ) to afford the title compound **13** as TFA salt, 6.8 mg (91% pure), as colorless oil. **<sup>1</sup>H NMR** (500 MHz,  $DMSO-d_6$ )  $\delta$  8.22 (s, 1H), 7.46 (s, 1H), 7.32 (s, 1H), 7.22 (dd,  $J = 8.1, 2.2$  Hz, 1H), 7.09 (d,  $J = 8.2$  Hz, 1H), 4.05 (q,  $J = 7.1$  Hz, 2H), 3.94 (h,  $J = 6.5$  Hz, 1H), 3.79 – 3.73 (m, 1H), 3.65 – 3.54 (m, 3H), 3.31 – 3.24 (m, 2H), 3.18 (m, 2H), 2.84 – 2.77 (m, 2H), 2.74 – 2.66 (m, 2H), 2.37 – 2.32 (m, 1H), 2.32 – 2.25 (m, 1H), 2.20 – 2.16 (m, 2H), 1.95 – 1.86 (m, 1H), 1.85 – 1.73 (m, 2H), 1.49 (dddd,  $J = 13.9, 8.7, 5.6, 2.3$  Hz, 1H), 1.18 (t,  $J = 7.1$  Hz, 3H). **<sup>13</sup>C NMR** (126 MHz,  $DMSO$ )  $\delta$  155.01, 147.17, 140.76, 138.71, 136.96, 133.74, 133.01, 132.04, 130.97,

129.30, 126.17, 79.18, 67.41, 61.15, 44.85, 40.03, 38.19, 31.14, 30.65, 25.53, 15.08. Chemical Formula of  $[M+H]^+$ :  $C_{27}H_{32}ClN_2O_3^+$ ; Exact Mass (calculated): 467.2096; **HRMS (ESI<sup>+</sup>)** (found): 467.2106.

**ethyl 4-(8-chloro-3-(2,2,2-trifluoroethyl)-5,6-dihydro-11H-benzo[5,6]cyclohepta[1,2-b]pyridine-11-ylidene)piperidine-1-carboxylate (14)**

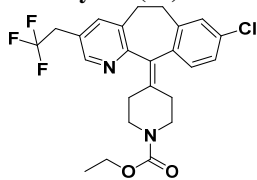

General procedure 6 was followed with larger scale where 2-bromo-1,1,1-trifluoroethane (50 mg) was used as alkyl-halide. It was purified with Mass Directed HPLC system under  $NH_4OH$  condition (0.16%  $NH_4OH$  in both  $CH_3CN$  and  $H_2O$ , 12 min. run, 25 mL/min., 50 – 85%  $CH_3CN$ ) to afford the title compound **14**, 4.0 mg (95% pure), as colorless oil.  $^1H$  NMR (500 MHz,  $DMSO-d_6$ )  $\delta$  8.34 (d,  $J = 5.0$  Hz, 1H), 7.59 (s, 1H), 7.33 (d,  $J = 2.1$  Hz, 1H), 7.23 (dd,  $J = 8.2, 2.2$  Hz, 1H), 7.11 (d,  $J = 8.2$  Hz, 1H), 4.05 (q,  $J = 7.1$  Hz, 2H), 3.72 – 3.54 (m, 4H), 3.37 – 3.28 (m, 2H) (overlap with water peak), 3.23 – 3.17 (m, 2H), 2.92 – 2.78 (m, 2H), 2.37 – 2.27 (m, 2H), 2.23 – 2.13 (m, 2H), 1.18 (t,  $J = 7.1$  Hz, 3H). Chemical Formula of  $[M+H]^+$ :  $C_{24}H_{25}ClF_3N_2O_2^+$ ; Exact Mass (calculated): 465.1551; **HRMS (ESI<sup>+</sup>)** (found): 465.1564.

**ethyl 4-(8-chloro-3-(2-(diethoxyphosphoryl)ethyl)-5,6-dihydro-11H-benzo[5,6]cyclohepta[1,2-b]pyridine-11-ylidene)piperidine-1-carboxylate (15)**

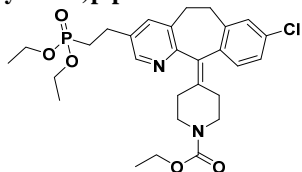

General procedure 6 was followed where diethyl (2-bromoethyl)phosphonate was used as alkyl-halide. It was purified with Mass Directed HPLC system under TFA condition (0.16% TFA in both  $CH_3CN$  and  $H_2O$ , 12 min. run, 25 mL/min., 25 – 60%  $CH_3CN$ ) to afford the title compound **15** as TFA salt, 14.9 mg (88% pure), colorless oil. It was further purified with prep. TLC plate (in 60% EtOAc/heptane). The band containing desired product was scratched off, stirred with EtOAc (30 mL) for 1 h. Then it was filtered and the filtrate was concentrated with GeneVac, to afford the title compound 4 mg (95% pure), as colorless oil.  $^1H$  NMR (500 MHz,  $DMSO-d_6$ )  $\delta$  8.26 (d,  $J = 1.9$  Hz, 1H), 7.50 (d,  $J = 1.8$  Hz, 1H), 7.32 (d,  $J = 2.1$  Hz, 1H), 7.21 (dd,  $J = 8.2, 2.2$  Hz, 1H), 7.08 (d,  $J = 8.2$  Hz, 1H), 4.05 (q,  $J = 7.1$  Hz, 2H), 3.95 (p,  $J = 7.1$  Hz, 4H), 3.62 (tt,  $J = 13.0, 5.1$  Hz, 2H), 3.29 – 3.24 (m, 2H), 3.19 – 3.16 (m, 2H), 2.87 – 2.70 (m, 4H), 2.38 – 2.32 (m, 1H), 2.31 – 2.52 (m, 1H), 2.22 – 2.15 (m, 2H), 2.12 – 2.01 (m, 2H), 1.18 (m, 9H). Chemical Formula of  $[M+H]^+$ :  $C_{28}H_{37}ClN_2O_5P^+$ ; Exact Mass (calculated): 547.2123; **HRMS (ESI<sup>+</sup>)** (found): 547.2136.

**ethyl 4-(8-chloro-3-(2-methoxyethyl)-5,6-dihydro-11H-benzo[5,6]cyclohepta[1,2-b]pyridine-11-ylidene)piperidine-1-carboxylate (16)**

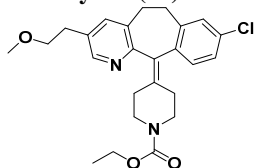

General procedure 6 was followed where diethyl 1-bromo-2-methoxyethane was used as alkyl-halide. It was purified with Mass Directed HPLC system under TFA condition (0.16% TFA in both  $CH_3CN$  and  $H_2O$ , 12 min. run, 25 mL/min., 25 – 60%  $CH_3CN$ ) to afford 10.6 mg (82% pure) of colorless oil, as TFA salt. It was further purified with prep. TLC plate (in 60% EtOAc/heptane). The band containing desired product was scratched off, stirred with EtOAc (30 mL) for 1 h. Then it was filtered and the filtrate was concentrated with GeneVac, to afford 4 mg (95% pure) of colorless oil. It was purified with micro-scale HPLC under TFA condition (0.16% TFA in both  $CH_3CN$  and  $H_2O$ , 6 min. run, 8 mL/min., 25 – 60%  $CH_3CN$ ), to afford the title compound **16**, 0.7 mg (95% pure), as colorless oil.  $^1H$  NMR (500 MHz,  $DMSO-d_6$ )  $\delta$  8.46 (s, 1H), 8.01 (s, 1H), 7.41 (d,  $J = 2.1$  Hz, 1H), 7.31 (dd,  $J = 8.1, 2.1$  Hz, 1H), 7.13 (d,  $J = 8.2$  Hz, 1H), 4.05 (q,  $J = 7.0$  Hz, 2H), 3.79 – 3.73 (m, 1H), 3.68 (dd,  $J = 11.7, 6.3$  Hz, 1H), 3.58 (t,  $J = 6.4$  Hz, 2H), 3.38 (ddt,  $J = 19.9, 14.9, 5.6$  Hz, 2H), 3.23 (s, 3H), 3.11 (brs, 2H), 2.98 – 2.84 (m, 4H), 2.36 (ddd,  $J = 14.1, 9.4, 4.8$  Hz, 1H), 2.27 (dt,  $J = 21.6, 9.3, 5.0$  Hz, 2H), 2.15 (dt,  $J = 13.8, 4.2$  Hz, 1H), 1.18 (t,  $J = 7.1$  Hz, 3H). Chemical Formula of  $[M+H]^+$ :  $C_{25}H_{30}ClN_2O_3^+$ ; Exact Mass (calculated): 441.1939; **HRMS (ESI<sup>+</sup>)** (found): 441.1948. NOTE: Due to low amount of the material,  $^1H$  NMR spectra showed peaks of  $NH_4OH$  which was induced during HPLC fraction drying down with GeneVac system.

**ethyl 4-(8-chloro-3-cyclobutyl-5,6-dihydro-11H-benzo[5,6]cyclohepta[1,2-b]pyridine-11-ylidene)piperidine-1-carboxylate (17)**

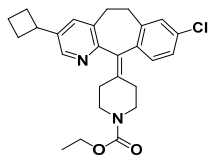

General procedure 6 was followed where bromocyclobutane was used as alkyl-halide. It was purified with Mass Directed HPLC system under TFA condition (0.16% TFA in both CH<sub>3</sub>CN and H<sub>2</sub>O, 12 min. run, 25 mL/min., 25 – 60% CH<sub>3</sub>CN) to afford the compound as TFA salt, 5.2 mg (86% pure), colorless oil. It was further purified with prep. TLC plate (in 60% EtOAc/heptane). The band containing desired product was scratched off, stirred with EtOAc (30 mL) for 1 h. Then it was filtered and the filtrate was concentrated with GeneVac, to afford 2 mg of colorless oil. It was purified with micro-scale HPLC under TFA condition (0.16% TFA in both CH<sub>3</sub>CN and H<sub>2</sub>O, 6 min. run, 6 mL/min., 25 – 60% CH<sub>3</sub>CN), to afford the title compound **17** as TFA salt, 0.8 mg (95% pure), as colorless oil. <sup>1</sup>H NMR (500 MHz, DMSO-*d*<sub>6</sub>) δ 8.48 (s, 1H), 8.23 (s, 1H), 7.43 (d, *J* = 2.1 Hz, 1H), 7.34 – 7.32 (m, 1H), 7.14 (d, *J* = 8.2 Hz, 1H), 4.06 (q, *J* = 7.0 Hz, 2H) (overlap with water peak), 3.84 – 3.78 (m, 1H), 3.73 – 3.62 (m, 2H), 3.45 (dt, *J* = 16.5, 5.8 Hz, 1H), 3.36 (ddd, *J* = 15.0, 10.2, 4.8 Hz, 1H), 3.12 (s, 2H), 3.02 (ddd, *J* = 16.1, 10.1, 4.7 Hz, 1H), 2.91 (dt, *J* = 14.5, 5.4 Hz, 1H), 2.40 – 2.24 (m, 5H), 2.23 – 2.11 (m, 3H), 2.07 – 1.97 (m, 1H), 1.89 – 1.82 (m, 1H), 1.18 (t, *J* = 7.1 Hz, 3H). Chemical Formula of [M+H]<sup>+</sup>: C<sub>26</sub>H<sub>30</sub>ClN<sub>2</sub>O<sub>2</sub><sup>+</sup>; Exact Mass (calculated): 437.1990; HRMS (ESI<sup>+</sup>) (found): 437.2003. NOTE: Due to low amount of the material, <sup>1</sup>H NMR spectra showed peaks of NH<sub>4</sub>OH which was induced during HPLC fraction drying down with GeneVac system.

**ethyl 4-(8-chloro-3-cyclopropyl-5,6-dihydro-11H-benzo[5,6]cyclohepta[1,2-*b*]pyridine-11-ylidene)piperidine-1-carboxylate (18)**

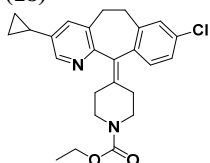

General procedure 6 was followed where bromocyclopropane was used as alkyl-halide. It was purified with Mass Directed HPLC system under TFA condition (0.16% TFA in both CH<sub>3</sub>CN and H<sub>2</sub>O, 12 min. run, 25 mL/min., 25 – 60% CH<sub>3</sub>CN) to afford the compound as TFA salt, 2.7 mg (93% pure), colorless oil. It was further purified with prep. TLC plate (in 60% EtOAc/heptane). The band containing desired product was scratched off, stirred with EtOAc (30 mL) for 1 h. Then it was filtered and the filtrate was concentrated with GeneVac, to afford 1 mg of colorless oil. It was purified with micro-scale HPLC under TFA condition (0.16% TFA in both CH<sub>3</sub>CN and H<sub>2</sub>O, 6 min. run, 6 mL/min., 25 – 60% CH<sub>3</sub>CN), to afford the title compound **18** as TFA salt, 0.3 mg (95% pure), as colorless oil. <sup>1</sup>H NMR (500 MHz, DMSO-*d*<sub>6</sub>) δ 8.45 (s, 1H), 7.84 (s, 1H), 7.41 (d, *J* = 2.1 Hz, 1H), 7.32 (dd, *J* = 8.1, 2.1 Hz, 1H), 7.12 (d, *J* = 8.2 Hz, 1H), 4.05 (q, *J* = 7.1 Hz, 2H), 3.79 – 3.70 (m, 2H) (overlap with water peak), 3.42 – 3.30 (m, 2H), 3.11 (brs, 2H), 2.98 – 2.84 (m, 2H), 2.38 – 2.21 (m, 3H), 2.18 – 2.06 (m, 2H), 1.18 (t, *J* = 7.1 Hz, 3H), 1.09 (d, *J* = 8.3 Hz, 2H), 0.88 (s, 2H). Chemical Formula of [M+H]<sup>+</sup>: C<sub>25</sub>H<sub>28</sub>ClN<sub>2</sub>O<sub>2</sub><sup>+</sup>; Exact Mass (calculated): 423.1834; HRMS (ESI<sup>+</sup>) (found): 423.1842. NOTE: Due to low amount of the material, <sup>1</sup>H NMR spectra showed peaks of NH<sub>4</sub>OH which was induced during HPLC fraction drying down with GeneVac system.

**ethyl 4-(8-chloro-3-cyclopentyl-5,6-dihydro-11H-benzo[5,6]cyclohepta[1,2-*b*]pyridine-11-ylidene)piperidine-1-carboxylate (19)**

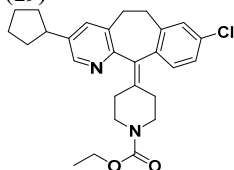

General procedure 6 was followed where bromocyclopentane was used as alkyl-halide. It was purified with Mass Directed HPLC system under TFA condition (0.16% TFA in both CH<sub>3</sub>CN and H<sub>2</sub>O, 12 min. run, 25 mL/min., 25 – 60% CH<sub>3</sub>CN) to afford the title compound **19** as TFA salt, 3.3 mg (90% pure), colorless oil. <sup>1</sup>H NMR (500 MHz, DMSO-*d*<sub>6</sub>) δ 8.42 (s, 1H), 7.93 (s, 1H), 7.39 (d, *J* = 2.1 Hz, 1H), 7.29 (dd, *J* = 8.1, 2.1 Hz, 1H), 7.11 (d, *J* = 8.2 Hz, 1H), 4.06 (q, *J* = 7.1 Hz, 2H), 3.69 (ddd, *J* = 17.7, 12.6, 6.3 Hz, 2H), 3.36 (tq, *J* = 14.7, 5.8 Hz, 2H), 3.13 (brs, 2H), 3.06 (p, *J* = 9.4 Hz, 1H), 2.97 – 2.84 (m, 2H), 2.38 – 2.17 (m, 4H), 2.08 – 2.00 (m, 2H), 1.77 (dd, *J* = 14.7, 4.4 Hz, 2H), 1.65 (ddd, *J* = 12.5, 7.1, 4.6 Hz, 2H), 1.62 – 1.51 (m, 2H), 1.18 (t, *J* = 7.1 Hz, 3H). <sup>13</sup>C NMR (126 MHz, DMSO-*d*<sub>6</sub>) δ 158.35, 155.00, 140.65, 137.49, 132.72, 130.88, 129.48, 126.55, 61.23, 44.43, 42.57, 40.02, 34.30, 30.86, 25.49, 15.07. Chemical Formula of [M+H]<sup>+</sup>: C<sub>27</sub>H<sub>32</sub>ClN<sub>2</sub>O<sub>2</sub><sup>+</sup>; Exact Mass (calculated): 451.2147; HRMS (ESI<sup>+</sup>) (found): 451.2157.

**tert-butyl 4-(8-chloro-11-(1-(ethoxycarbonyl)piperidin-4-ylidene)-6,11-dihydro-5H-benzo[5,6]cyclohepta[1,2-*b*]pyridine-3-yl)piperidine-1-carboxylate (20)**

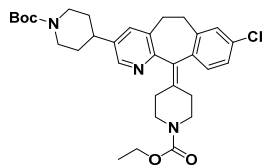

General procedure 6 was followed where *tert*-butyl 4-bromopiperidine-1-carboxylate was used as alkyl-halide. It was purified with Mass Directed HPLC system under TFA condition (0.16% TFA in both CH<sub>3</sub>CN and H<sub>2</sub>O, 12 min. run, 25 mL/min., 25 – 60% CH<sub>3</sub>CN), to afford 7.8 mg (92% pure) of colorless oil. Chemical Formula of [M+H]<sup>+</sup>: C<sub>32</sub>H<sub>41</sub>ClN<sub>3</sub>O<sub>4</sub><sup>+</sup>; Exact Mass (calculated): 566.2780; **HRMS (ESI<sup>+</sup>)** (found): 566.2794.

**ethyl 4-(8-chloro-3-(piperidin-4-yl)-5,6-dihydro-11H-benzo[5,6]cyclohepta[1,2-b]pyridin-11-ylidene)piperidine-1-carboxylate (21)**

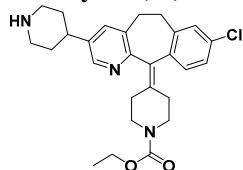

During HPLC purification of compound **20**, Boc-protecting group partially fell off. It was further purified with prep. TLC plate (in 60% EtOAc/heptane). The band containing desired product was scratched off, stirred with EtOAc (30 mL) for 1 h. Then it was filtered and the filtrate was concentrated with GeneVac, to afford 4 mg of colorless oil. It was purified with micro-scale HPLC under TFA condition (0.16% TFA in both CH<sub>3</sub>CN and H<sub>2</sub>O, 6 min. run, 6 mL/min., 11 – 75% CH<sub>3</sub>CN), to afford the de-Boc compound **21**, as TFA salt, 0.1 mg (95% pure), as colorless oil. <sup>1</sup>H NMR (500 MHz, DMSO-*d*<sub>6</sub>) δ 8.54 – 8.48 (m, 1H), 8.41 (d, *J* = 1.5 Hz, 1H), 7.81 (s, 1H), 7.39 (d, *J* = 2.2 Hz, 1H), 7.28 (dd, *J* = 8.3, 2.3 Hz, 1H), 7.12 (d, *J* = 8.2 Hz, 1H), 4.05 (q, *J* = 7.0 Hz, 2H), 3.68 (tt, *J* = 12.4, 6.3 Hz, 2H), 3.42 – 3.32 (m, 4H), 3.14 (s, 2H), 3.05 – 2.92 (m, 4H), 2.87 (ddd, *J* = 14.9, 9.2, 3.4 Hz, 1H), 2.35 (ddd, *J* = 13.9, 9.2, 4.4 Hz, 1H), 2.28 (ddd, *J* = 13.7, 8.9, 4.7 Hz, 1H), 2.20 (ddt, *J* = 14.8, 9.8, 4.8 Hz, 2H), 1.99 (d, *J* = 13.7 Hz, 2H), 1.86 – 1.77 (m, 2H), 1.18 (t, *J* = 7.1 Hz, 3H). Chemical Formula of [M+H]<sup>+</sup>: C<sub>27</sub>H<sub>33</sub>ClN<sub>3</sub>O<sub>2</sub><sup>+</sup>; Exact Mass (calculated): 466.2256; **HRMS (ESI<sup>+</sup>)** (found): 466.2267. NOTE: Due to low amount of the material, <sup>1</sup>H NMR spectra showed peaks of NH<sub>4</sub>OH which was induced during HPLC fraction drying down with GeneVac system.

***tert*-butyl 4-((8-chloro-11-(1-(ethoxycarbonyl)piperidin-4-ylidene)-6,11-dihydro-5H-benzo[5,6]cyclohepta[1,2-*b*]pyridine-3-yl)methyl)piperidine-1-carboxylate (22)**

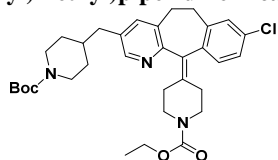

General procedure 6 was followed in a larger scale, 50 mg of ethyl 4-(3-bromo-8-chloro-5H-benzo[5,6]cyclohepta[1,2-*b*]pyridin-11(6H)-ylidene)piperidine-1-carboxylate. *Tert*-butyl 4-(bromomethyl)piperidine-1-carboxylate was used as alkyl-halide. It was further purified with 2 prep. TLC plates (in 3% MeOH/EtOAc). The band containing desired product was scratched off, stirred with 3% MeOH/EtOAc (30 mL) for 0.5 h. Then it was filtered and the filtrate was concentrated with GeneVac, to afford 22.6 mg of light brown oil. Chemical Formula of [M+H]<sup>+</sup>: C<sub>33</sub>H<sub>43</sub>ClN<sub>3</sub>O<sub>4</sub><sup>+</sup>; Exact Mass (calculated): 580.2937; **HRMS (ESI<sup>+</sup>)** (found): 580.2953.

**ethyl 4-(8-chloro-3-(piperidin-4-ylmethyl)-5,6-dihydro-11H-benzo[5,6]cyclohepta[1,2-*b*]pyridin-11-ylidene)piperidine-1-carboxylate (23)**

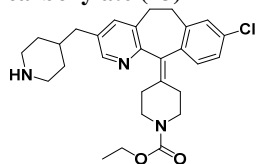

*Tert*-butyl 4-((8-chloro-11-(1-(ethoxycarbonyl)piperidin-4-ylidene)-6,11-dihydro-5H-benzo[5,6]cyclohepta[1,2-*b*]pyridine-3-yl)methyl)piperidine-1-carboxylate, compound **22**, (22.6 mg, 39 μmol) was dissolved in CH<sub>2</sub>Cl<sub>2</sub> (1 mL). Trifluoroacetic acid (0.5 mL) was added to the solution. The reaction mixture was shaken at 240 rpm at r.t. for 1 h. Volatiles were removed with GeneVac. The residue was purified with Mass Directed HPLC system under TFA condition (0.16% TFA in both CH<sub>3</sub>CN and H<sub>2</sub>O, 12 min. run, 25 mL/min., 10 – 45% CH<sub>3</sub>CN), to afford the title compound **23** as TFA salt, 12.6 mg (92% pure), light yellow oil. <sup>1</sup>H NMR (500 MHz, DMSO-*d*<sub>6</sub>) δ 8.44 (s, 1H), 8.32 (s, 1H), 7.92 (s, 1H), 7.41 (d, *J* = 2.0 Hz, 1H), 7.30 (dd, *J* = 8.1, 2.1 Hz, 1H), 7.13 (d, *J* = 8.2 Hz, 1H), 4.06 (q, *J* = 7.1 Hz, 2H), 3.70 (ddd, *J* = 23.3, 11.5, 5.6 Hz, 2H), 3.44 – 3.31 (m, 2H), 3.24 (d, *J* = 11.9 Hz, 2H), 3.14 (m, 2H), 2.97 – 2.85 (m, 2H), 2.83 – 2.75 (m, 2H), 2.61 (m, 2H), 2.36 (dd, *J* = 9.4, 4.7 Hz, 1H), 2.25 (tdd, *J* = 18.7, 9.4, 4.7 Hz, 2H), 2.16 (dt, *J* = 13.8, 4.0 Hz, 1H), 1.84 (m, 1H), 1.72 (d, *J* = 13.3 Hz, 2H), 1.32 (q, *J* = 12.7 Hz, 2H), 1.18 (t, *J* = 7.1 Hz, 3H). <sup>13</sup>C

**NMR** (126 MHz, DMSO-*d*<sub>6</sub>) δ 154.99, 140.61, 137.37, 132.80, 130.94, 129.50, 126.64, 61.25, 44.37, 43.56, 38.02, 34.77, 31.16, 30.83, 30.54, 28.38, 15.07. Chemical Formula of [M+H]<sup>+</sup>: C<sub>28</sub>H<sub>35</sub>ClN<sub>3</sub>O<sub>2</sub><sup>+</sup>; Exact Mass (calculated): 480.2412; **HRMS (ESI<sup>+</sup>)** (found): 480.2424.

**ethyl 4-(8-chloro-3-(oxetan-3-yl)-5,6-dihydro-11H-benzo[5,6]cyclohepta[1,2-b]pyridine-11-ylidene)piperidine-1-carboxylate (24)**

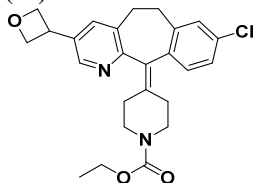

General procedure 6 was followed where 3-iodooxetane was used as alkyl-halide. It was purified with Mass Directed HPLC system under ammonium hydroxide condition (0.16% NH<sub>4</sub>OH in both CH<sub>3</sub>CN and H<sub>2</sub>O, 12 min. run, 25 mL/min., 50 – 85% CH<sub>3</sub>CN) to afford the title compound **24**, 2.6 mg (91% pure), as colorless oil. **<sup>1</sup>H NMR** (500 MHz, DMSO-*d*<sub>6</sub>) δ 8.32 (d, *J* = 1.9 Hz, 1H), 7.72 (d, *J* = 1.8 Hz, 1H), 7.33 (d, *J* = 2.0 Hz, 1H), 7.22 (dd, *J* = 8.1, 2.1 Hz, 1H), 7.10 (d, *J* = 8.2 Hz, 1H), 4.92 (dt, *J* = 8.3, 5.7 Hz, 2H), 4.62 (dt, *J* = 9.4, 6.4 Hz, 2H), 4.24 (p, *J* = 7.6 Hz, 1H), 4.05 (q, *J* = 7.1 Hz, 2H), 3.63 (ddd, *J* = 18.8, 13.4, 5.0 Hz, 2H), 3.38 – 3.30 (m, 2H), 3.22 – 3.14 (m, 2H), 2.86 (tdd, *J* = 13.6, 9.4, 6.1 Hz, 2H), 2.38 – 2.26 (m, 2H), 2.23 – 2.15 (m, 2H), 1.18 (t, *J* = 7.1 Hz, 3H). Chemical Formula of [M+H]<sup>+</sup>: C<sub>25</sub>H<sub>28</sub>ClN<sub>2</sub>O<sub>3</sub><sup>+</sup>; Exact Mass (calculated): 439.1783; **HRMS (ESI<sup>+</sup>)** (found): 439.1791.

**ethyl 4-(8-chloro-3-(2-(2-oxopyrrolidin-1-yl)ethyl)-5,6-dihydro-11H-benzo[5,6]cyclohepta[1,2-b]pyridine-11-ylidene)piperidine-1-carboxylate (25)**

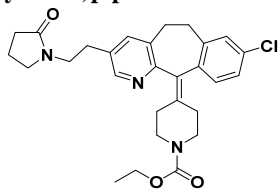

General procedure 6 was followed where 1-(2-bromoethyl)pyrrolidin-2-one was used as alkyl-halide. It was purified with Mass Directed HPLC system under ammonium hydroxide condition (0.16% NH<sub>4</sub>OH in both CH<sub>3</sub>CN and H<sub>2</sub>O, 12 min. run, 25 mL/min., 50 – 85% CH<sub>3</sub>CN) to afford the title compound **25**, 5.9 mg (90% pure), as colorless oil. **<sup>1</sup>H NMR** (500 MHz, DMSO-*d*<sub>6</sub>) δ 8.23 – 8.21 (m, 1H), 7.46 (s, 1H), 7.32 (d, *J* = 2.2 Hz, 1H), 7.22 (dd, *J* = 8.2, 2.2 Hz, 1H), 7.09 (d, *J* = 8.2 Hz, 1H), 4.05 (q, *J* = 7.1 Hz, 2H), 3.61 (td, *J* = 13.2, 6.5 Hz, 2H), 3.41 – 3.37 (m, 2H), 3.31 – 3.24 (m, 4H), 3.18 (m, 2H), 2.81 (td, *J* = 11.2, 10.5, 5.6 Hz, 2H), 2.73 (t, *J* = 7.4 Hz, 2H), 2.36 – 2.25 (m, 2H), 2.20 – 2.13 (m, 4H), 1.88 (p, *J* = 7.7 Hz, 2H), 1.18 (t, *J* = 7.1 Hz, 3H). Chemical Formula of [M+H]<sup>+</sup>: C<sub>28</sub>H<sub>33</sub>ClN<sub>3</sub>O<sub>3</sub><sup>+</sup>; Exact Mass (calculated): 494.2205; **HRMS (ESI<sup>+</sup>)** (found): 494.2205.

**tert-butyl ((4*S,Z*)-1,4-dimethyl-6-oxo-4-(4-((tetrahydrofuran-2-yl)methyl)thiophen-2-yl)tetrahydropyrimidin-2(1*H*)-ylidene)carbamate (26)**

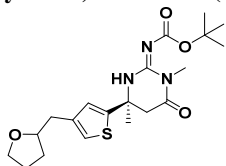

General procedure 7 was followed where 2-(bromomethyl)tetrahydrofuran was used as alkyl-halide. It was purified with Mass Directed HPLC system under TFA condition (0.16% TFA in both CH<sub>3</sub>CN and H<sub>2</sub>O, 12 min. run, 25 mL/min., 15 – 55% CH<sub>3</sub>CN), to afford 10.9 mg of light brown oil. Boc-protecting group partially fell off. LCMS R<sub>T</sub> = 1.07 min. (2 min. run); Chemical Formula of [M+H]<sup>+</sup>: C<sub>20</sub>H<sub>30</sub>N<sub>3</sub>O<sub>4</sub>S<sup>+</sup>; Exact Mass (calculated): 408.20; **Exact Mass (ESI<sup>+</sup>)** (found): 408.24.

**(6*S*)-2-imino-3,6-dimethyl-6-(4-((tetrahydrofuran-2-yl)methyl)thiophen-2-yl)tetrahydropyrimidin-4(1*H*)-one (27)**

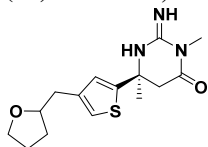

The residue of compound **26** (10.9 mg) was treated with TFA (0.4 mL) in CH<sub>2</sub>Cl<sub>2</sub> (0.6 mL), stirred at r.t. for 1 h. Volatiles were removed with GeneVac, to afford the title compound **27**, 9.7 mg (90% pure), light brown solid, as TFA salt. **<sup>1</sup>H NMR** (500 MHz, DMSO-*d*<sub>6</sub>) δ 8.66 (s, 2H), 7.16 (s, 1H), 6.97 (d, *J* = 1.2 Hz, 1H), 3.96 (dtd, *J* = 13.1, 6.6, 2.3 Hz, 1H), 3.74 (dtd, *J* = 10.8, 6.8, 3.8 Hz, 1H), 3.64 – 3.55 (m, 1H), 3.32 – 3.18 (m, 2H), 3.14 (s, 3H), 2.68 (t, *J* = 7.3 Hz, 2H), 1.88 (ddq, *J* = 14.1, 6.5, 3.4, 2.8 Hz, 1H), 1.82 – 1.72 (m, 2H), 1.69 (s, 3H), 1.45 (dq, *J* = 11.9, 7.7 Hz, 1H). Chemical Formula of [M+H]<sup>+</sup>: C<sub>15</sub>H<sub>22</sub>N<sub>3</sub>O<sub>2</sub>S<sup>+</sup>; Exact Mass (calculated): 308.1427; **HRMS (ESI<sup>+</sup>)** (found): 308.1431.



***tert*-butyl (S,Z)-(1,4-dimethyl-6-oxo-(4-(2,2,2-trifluoroethyl)thiophen-2-yl)tetrahydropyrimidin-2(1H)-ylidene)carbamate (28)**

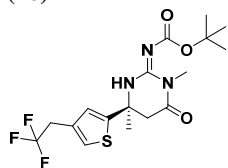

General procedure 7 was followed where 2-bromo-1,1,1-trifluoroethane was used as alkyl-halide. The compound was lost during Mass Directed HPLC purification. LCMS  $R_T = 1.23$  min. (2 min. run); Chemical Formula of  $[M+H]^+$ :  $C_{17}H_{23}F_3N_3O_3S^+$ ; Exact Mass (calculated): 406.14; **Exact Mass (ESI<sup>+</sup>)** (found): 406.14.

***tert*-butyl (S,Z)-(4-(4-(2-(diethoxyphosphoryl)ethyl)thiophen-2-yl)-1,4-dimethyl-6-oxotetrahydropyrimidin-2(1H)-ylidene)carbamate (29)**

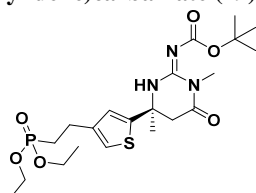

General procedure 7 was followed where diethyl (2-bromoethyl)phosphonate was used as alkyl-halide. It was purified with Mass Directed HPLC system under TFA condition (0.16% TFA in both  $CH_3CN$  and  $H_2O$ , 12 min. run, 25 mL/min., 15 – 55%  $CH_3CN$ ), to afford 15.4 mg of light brown oil. Boc-protecting group partially fell off. LCMS  $R_T = 0.98$  min. (2 min. run); Chemical Formula of  $[M+H]^+$ :  $C_{21}H_{35}N_3O_6PS^+$ ; Exact Mass (calculated): 488.20; **Exact Mass (ESI<sup>+</sup>)** (found): 488.17.

**diethyl (S)-(2-(5-(2-imino-1,4-dimethyl-6-oxohexahydropyrimidin-4-yl)thiophen-3-yl)ethyl)phosphonate (30)**

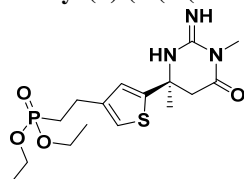

The residue of compound **29** (15.4 mg) was treated with TFA (0.4 mL) in  $CH_2Cl_2$  (0.6 mL), stirred at r.t. for 1 h. Volatiles were removed with GeneVac, to afford the title compound **30**, 13.5 mg (95% pure), light brown solid, as TFA salt. **<sup>1</sup>H NMR** (500 MHz,  $DMSO-d_6$ )  $\delta$  8.65 (s, 2H), 7.22 (s, 1H), 7.05 (d,  $J = 1.2$  Hz, 1H), 4.01 – 3.95 (m, 4H), 3.32 – 3.20 (m, 2H), 3.13 (s, 3H), 2.76 – 2.67 (m, 2H), 2.09 – 1.99 (m, 2H), 1.69 (s, 3H), 1.22 (t,  $J = 7.0$  Hz, 6H). Chemical Formula of  $[M+H]^+$ :  $C_{16}H_{27}N_3O_4PS^+$ ; Exact Mass (calculated): 388.1454; **HRMS (ESI<sup>+</sup>)** (found): 388.1462.

***tert*-butyl (S,Z)-(4-(4-(2-methoxyethyl)thiophen-2-yl)-1,4-dimethyl-6-oxotetrahydropyrimidin-2(1H)-ylidene)carbamate (31)**

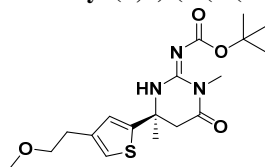

General procedure 7 was followed where diethyl 1-bromo-2-methoxyethane was used as alkyl-halide. It was purified with Mass Directed HPLC system under TFA condition (0.16% TFA in both  $CH_3CN$  and  $H_2O$ , 12 min. run, 25 mL/min., 15 – 55%  $CH_3CN$ ), to afford 13 mg of light brown oil. Boc-protecting group partially fell off. LCMS  $R_T = 1.02$  min. (2 min. run); Chemical Formula of  $[M+H]^+$ :  $C_{18}H_{28}N_3O_4S^+$ ; Exact Mass (calculated): 382.18; **Exact Mass (ESI<sup>+</sup>)** (found): 382.20.

**(S)-2-imino-6-(4-(2-methoxyethyl)thiophen-2-yl)-3,6-dimethyltetrahydropyrimidin-4(1H)-one (32)**

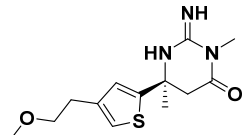

The residue of compound **31** (13 mg) was treated with TFA (0.4 mL) in  $CH_2Cl_2$  (0.6 mL), stirred at r.t. for 1 h. Volatiles were removed with GeneVac, to afford the title compound **32**, 11.1 mg (90% pure), light brown solid, as TFA salt. **<sup>1</sup>H NMR** (500 MHz,  $DMSO-d_6$ )  $\delta$  6.93 (s, 1H), 6.78 (s, 1H), 5.91 (brs, 2H), 3.50 (t,  $J = 6.9$  Hz, 2H), 3.25 (s, 3H), 3.02 (s, 3H), 2.77 – 2.65 (m, 4H), 1.41 (s, 3H). Chemical Formula of  $[M+H]^+$ :  $C_{13}H_{20}N_3O_2S^+$ ; Exact Mass (calculated): 282.1271; **HRMS (ESI<sup>+</sup>)** (found): 282.1274.

***tert*-butyl (*S,Z*)-(4-(4-cyclobutylthiophen-2-yl)-1,4-dimethyl-6-oxotetrahydropyrimidin-2(1*H*)-ylidene)carbamate (33)**

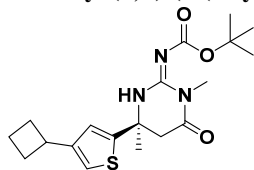

General procedure 7 was followed where bromocyclobutane was used as alkyl-halide. It was purified with Mass Directed HPLC system under TFA condition (0.16% TFA in both CH<sub>3</sub>CN and H<sub>2</sub>O, 12 min. run, 25 mL/min., 15 – 55% CH<sub>3</sub>CN), to afford 7.3 mg of light brown oil. Boc-protecting group partially fell off. LCMS R<sub>T</sub> = 1.23 min. (2 min. run); Chemical Formula of [M+H]<sup>+</sup>: C<sub>19</sub>H<sub>28</sub>N<sub>3</sub>O<sub>3</sub>S<sup>+</sup>; Exact Mass (calculated): 378.18; **Exact Mass (ESI<sup>+</sup>)** (found): 378.20.

**(*S*)-6-(4-cyclobutylthiophen-2-yl)-2-imino-3,6-dimethyltetrahydropyrimidin-4(1*H*)-one (34)**

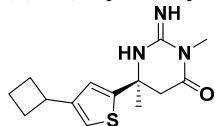

The residue of compound **33** (7.3 mg) was treated with TFA (0.4 mL) in CH<sub>2</sub>Cl<sub>2</sub> (0.6 mL), stirred at r.t. for 1 h. Volatiles were removed with GeneVac, to afford the title compound **34**, 6.0 mg (90% pure), light brown solid, as TFA salt. <sup>1</sup>H NMR (500 MHz, DMSO-*d*<sub>6</sub>) δ 8.59 (brs, 2H), 7.14 (s, 1H), 7.02 (d, *J* = 1.4 Hz, 1H), 3.45 (p, *J* = 8.5 Hz, 1H), 3.32 (d, *J* = 16.4 Hz, 1H), 3.21 (d, *J* = 16.3 Hz, 1H), 3.13 (s, 3H), 2.25 (dtd, *J* = 10.5, 7.9, 2.7 Hz, 2H), 2.06 – 1.99 (m, 2H), 1.97 – 1.90 (m, 1H), 1.84 – 1.79 (m, 1H), 1.69 (s, 3H). Chemical Formula of [M+H]<sup>+</sup>: C<sub>14</sub>H<sub>20</sub>N<sub>3</sub>OS<sup>+</sup>; Exact Mass (calculated): 278.1322; **HRMS (ESI<sup>+</sup>)** (found): 278.1325.

***tert*-butyl (*S,Z*)-(4-(4-cyclopropylthiophen-2-yl)-1,4-dimethyl-6-oxotetrahydropyrimidin-2(1*H*)-ylidene)carbamate (35)**

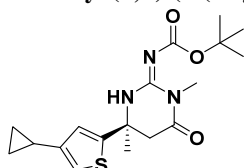

General procedure 7 was followed where bromocyclopropane was used as alkyl-halide. It was purified with Mass Directed HPLC system under TFA condition (0.16% TFA in both CH<sub>3</sub>CN and H<sub>2</sub>O, 12 min. run, 25 mL/min., 15 – 55% CH<sub>3</sub>CN), to afford 3.8 mg of light brown oil. Boc-protecting group partially fell off. LCMS R<sub>T</sub> = 1.13 min. (2 min. run); Chemical Formula of [M+H]<sup>+</sup>: C<sub>18</sub>H<sub>26</sub>N<sub>3</sub>O<sub>3</sub>S<sup>+</sup>; Exact Mass (calculated): 364.17; **Exact Mass (ESI<sup>+</sup>)** (found): 364.10.

**(*S*)-6-(4-cyclopropylthiophen-2-yl)-2-imino-3,6-dimethyltetrahydropyrimidin-4(1*H*)-one (36)**

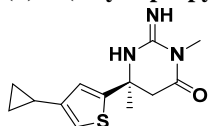

The residue of compound **35** (3.8 mg) was treated with TFA (0.4 mL) in CH<sub>2</sub>Cl<sub>2</sub> (0.6 mL), stirred at r.t. for 1 h. Volatiles were removed with GeneVac. The crude material was purified with micro-scale HPLC under TFA condition (0.16% TFA in both CH<sub>3</sub>CN and H<sub>2</sub>O, 12 min. run, 8 mL/min., 15 – 55% CH<sub>3</sub>CN), to afford the title compound **36**, 1.5 mg (100% pure), off-white solid, as TFA salt. <sup>1</sup>H NMR (500 MHz, DMSO-*d*<sub>6</sub>) δ 7.02 (d, *J* = 1.2 Hz, 1H), 6.85 (d, *J* = 1.4 Hz, 1H), 3.29 (d, *J* = 16.3 Hz, 1H), 3.21 (d, *J* = 16.3 Hz, 1H), 3.13 (s, 3H), 1.87 (ddd, *J* = 13.4, 8.4, 5.1 Hz, 1H), 1.67 (s, 3H), 0.88 – 0.84 (m, 2H), 0.61 – 0.53 (m, 2H). Chemical Formula of [M+H]<sup>+</sup>: C<sub>13</sub>H<sub>18</sub>N<sub>3</sub>OS<sup>+</sup>; Exact Mass (calculated): 264.1165; **HRMS (ESI<sup>+</sup>)** (found): 264.1168. NOTE: Due to low amount of the material, <sup>1</sup>H NMR spectra showed peaks of NH<sub>4</sub>OH which was induced during HPLC fraction drying down with GeneVac system. The two NH protons are exchangeable and don't show up in NMR spectra.

***tert*-butyl (*S,Z*)-(4-(4-cyclopentylthiophen-2-yl)-1,4-dimethyl-6-oxotetrahydropyrimidin-2(1*H*)-ylidene)carbamate (37)**

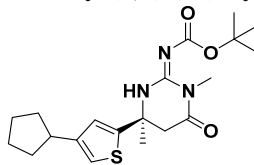

General procedure 7 was followed where bromocyclopentane was used as alkyl-halide. It was purified with Mass Directed HPLC system under TFA condition (0.16% TFA in both CH<sub>3</sub>CN and H<sub>2</sub>O, 12 min. run, 25 mL/min., 15 – 55% CH<sub>3</sub>CN), to afford 9 mg of light brown oil. Boc-protecting group partially fell off. LCMS R<sub>T</sub> = 1.29 min. (2 min. run); Chemical Formula of [M+H]<sup>+</sup>: C<sub>20</sub>H<sub>30</sub>N<sub>3</sub>O<sub>3</sub>S<sup>+</sup>; Exact Mass (calculated): 392.20; **Exact Mass (ESI<sup>+</sup>)** (found): 392.24.

**(S)-6-(4-cyclopentylthiophen-2-yl)-2-imino-3,6-dimethyltetrahydropyrimidin-4(1H)-one (38)**

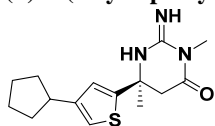

The residue of compound **37** (9 mg) was treated with TFA (0.4 mL) in CH<sub>2</sub>Cl<sub>2</sub> (0.6 mL), stirred at r.t. for 1 h. Volatiles were removed with GeneVac, to afford the title compound **38**, 7.4 mg (85% pure), light brown solid, as TFA salt. <sup>1</sup>H NMR (500 MHz, DMSO-*d*<sub>6</sub>) δ 8.60 (brs, 2H), 7.11 (s, 1H), 7.00 (d, *J* = 1.4 Hz, 1H), 3.31 (d, *J* = 16.4 Hz, 1H), 3.21 (d, *J* = 16.3 Hz, 1H), 3.13 (s, 3H), 3.00 – 2.89 (m, 1H), 2.02 – 1.92 (m, 2H), 1.78 – 1.63 (m, 5H), 1.63 – 1.54 (m, 2H), 1.48 (ddt, *J* = 11.7, 9.0, 5.7 Hz, 2H). Chemical Formula of [M+H]<sup>+</sup>: C<sub>15</sub>H<sub>22</sub>N<sub>3</sub>OS<sup>+</sup>; Exact Mass (calculated): 292.1478; **HRMS (ESI<sup>+</sup>)** (found): 292.1479.

**tert-butyl (S,Z)-4-(5-(2-((tert-butoxycarbonyl)imino)-1,4-dimethyl-6-hexahydropyrimidin-4-yl)thiophen-3-yl)piperidine-1-carboxylate (39)**

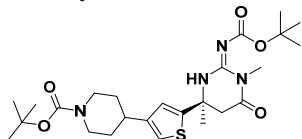

General procedure 7 was followed where *tert*-butyl 4-bromopiperidine-1-carboxylate was used as alkyl-halide. It was purified with Mass Directed HPLC system under TFA condition (0.16% TFA in both CH<sub>3</sub>CN and H<sub>2</sub>O, 12 min. run, 25 mL/min., 15 – 55% CH<sub>3</sub>CN), to afford 15.1 mg of light brown oil. Boc-protecting groups partially fell off. LCMS R<sub>T</sub> = 1.25 min. (2 min. run); Chemical Formula of [M+H]<sup>+</sup>: C<sub>25</sub>H<sub>39</sub>N<sub>4</sub>O<sub>5</sub>S<sup>+</sup>; Exact Mass (calculated): 507.26; **Exact Mass (ESI<sup>+</sup>)** (found): 507.22.

**(S)-2-imino-3,6-dimethyl-6-(4-(piperidin-4-yl)thiophen-2-yl)tetrahydropyrimidin-4(1H)-one (40)**

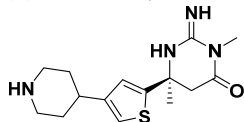

The residue of compound **39** (15.1 mg) was treated with TFA (0.4 mL) in CH<sub>2</sub>Cl<sub>2</sub> (0.6 mL), stirred at r.t. for 1 h. Volatiles were removed with GeneVac. The crude material was purified with Mass Directed HPLC system under TFA condition (0.16% TFA in both CH<sub>3</sub>CN and H<sub>2</sub>O, 12 min. run, 25 mL/min., 15 – 55% CH<sub>3</sub>CN), to afford the title compound **40**, 9.8 mg (100% pure), off-white solid, as TFA salt. <sup>1</sup>H NMR (500 MHz, DMSO-*d*<sub>6</sub>) δ 8.84 (brs, 1H), 8.61 (s, 1H), 8.33 (s, 1H), 7.19 (s, 1H), 7.01 (d, *J* = 1.4 Hz, 1H), 3.34 (d, *J* = 12.5 Hz, 2H), 3.30 (d, *J* = 16.7 Hz, 1H), 3.24 (d, *J* = 16.3 Hz, 1H), 3.12 (s, 3H), 2.98 (q, *J* = 12.7 Hz, 2H), 2.83 (ddd, *J* = 11.8, 8.5, 3.5 Hz, 1H), 2.03 (d, *J* = 13.9 Hz, 2H), 1.69 (s, 3H), 1.68 – 1.58 (m, 2H). Chemical Formula of [M+H]<sup>+</sup>: C<sub>15</sub>H<sub>23</sub>N<sub>4</sub>OS<sup>+</sup>; Exact Mass (calculated): 307.1587; **HRMS (ESI<sup>+</sup>)** (found): 307.1590.

**tert-butyl (S,Z)-4-((5-(2-((tert-butoxycarbonyl)imino)-1,4-dimethyl-6-oxohexahydropyrimidin-4-yl)thiophen-3-yl)methyl)piperidine-1-carboxylate (41)**

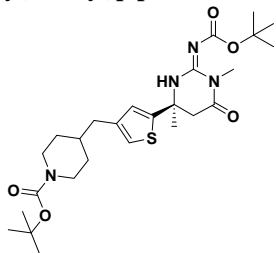

General procedure 7 was followed where *tert*-butyl 4-(bromomethyl)piperidine-1-carboxylate was used as alkyl-halide. It was purified with Mass Directed HPLC system under TFA condition (0.16% TFA in both CH<sub>3</sub>CN and H<sub>2</sub>O, 12 min. run, 25 mL/min., 15 – 55% CH<sub>3</sub>CN), to afford 12.6 mg of light brown oil. Boc-protecting groups partially fell off. LCMS R<sub>T</sub> = 1.29 min. (2 min. run); Chemical Formula of [M+H]<sup>+</sup>: C<sub>26</sub>H<sub>41</sub>N<sub>4</sub>O<sub>5</sub>S<sup>+</sup>; Exact Mass (calculated): 521.28; **Exact Mass (ESI<sup>+</sup>)** (found): 521.26.

**(S)-2-imino-3,6-dimethyl-6-(4-(piperidin-4-ylmethyl)thiophen-2-yl)tetrahydropyrimidin-4(1H)-one (42)**

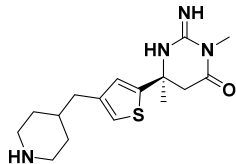

The residue of compound **41** (12.6 mg) was treated with TFA (0.4 mL) in CH<sub>2</sub>Cl<sub>2</sub> (0.6 mL), stirred at r.t. for 1 h. Volatiles were removed with GeneVac. The crude material was purified with Mass Directed HPLC system under TFA condition (0.16% TFA in

both CH<sub>3</sub>CN and H<sub>2</sub>O, 12 min. run, 25 mL/min., 15 – 55% CH<sub>3</sub>CN), to afford the title compound **42**, 7.2 mg (100% pure), off-white solid, as TFA salt. <sup>1</sup>H NMR (500 MHz, DMSO-*d*<sub>6</sub>) δ 8.79 (brs, 1H), 8.49 (s, 1H), 8.20 (s, 1H), 7.15 (s, 1H), 6.92 (d, *J* = 1.2 Hz, 1H), 3.30 – 3.21 (m, 4H), 3.12 (s, 3H), 2.82 (q, *J* = 11.9 Hz, 2H), 2.48 (d, *J* = 6.9 Hz, 2H), 1.80 – 1.71 (m, 3H), 1.69 (s, 3H), 1.27 (dd, *J* = 24.1, 11.3 Hz, 2H). Chemical Formula of [M+H]<sup>+</sup>: C<sub>16</sub>H<sub>25</sub>N<sub>4</sub>OS<sup>+</sup>; Exact Mass (calculated): 321.1744; HRMS (ESI<sup>+</sup>) (found): 321.1749.

**tert-butyl (S,Z)-(1,4-dimethyl-6-oxo-4-(4-(tetrahydro-2H-pyran-4-yl)thiophen-2-yl)tetrahydropyrimidin-2(1H)-ylidene)carbamate (43)**

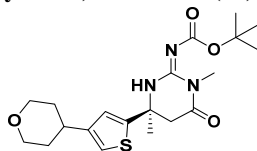

General procedure 7 was followed where 4-bromotetrahydro-2H-pyran was used as alkyl-halide. It was purified with Mass Directed HPLC system under TFA condition (0.16% TFA in both CH<sub>3</sub>CN and H<sub>2</sub>O, 12 min. run, 25 mL/min., 15 – 55% CH<sub>3</sub>CN), to afford 12.5 mg of light brown oil. Boc-protecting groups partially fell off. LCMS R<sub>T</sub> = 1.03 min. (2 min. run); Chemical Formula of [M+H]<sup>+</sup>: C<sub>20</sub>H<sub>30</sub>N<sub>3</sub>O<sub>4</sub>S<sup>+</sup>; Exact Mass (calculated): 408.20; Exact Mass (ESI<sup>+</sup>) (found): 408.24.

**(S)-2-imino-3,6-dimethyl-6-(4-(tetrahydro-2H-pyran-4-yl)thiophen-2-yl)tetrahydropyrimidin-4(1H)-one (44)**

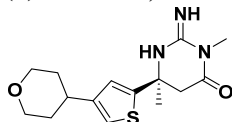

The residue of compound **43** (12.5 mg) was treated with TFA (0.4 mL) in CH<sub>2</sub>Cl<sub>2</sub> (0.6 mL), stirred at r.t. for 1 h. Volatiles were removed with GeneVac, to afford the title compound **44**, 10.4 mg (95% pure), light brown solid, as TFA salt. <sup>1</sup>H NMR (500 MHz, DMSO-*d*<sub>6</sub>) δ 8.63 (s, 2H), 7.15 (s, 1H), 7.06 (d, *J* = 1.4 Hz, 1H), 3.91 (dd, *J* = 11.0, 3.7 Hz, 2H), 3.40 (td, *J* = 11.7, 2.0 Hz, 2H), 3.31 (d, *J* = 16.4 Hz, 1H), 3.22 (d, *J* = 16.3 Hz, 1H), 3.13 (s, 3H), 2.76 (tt, *J* = 11.7, 3.6 Hz, 1H), 1.80 – 1.73 (m, 2H), 1.70 (s, 3H), 1.55 (qdd, *J* = 12.0, 7.2, 4.4 Hz, 2H). <sup>13</sup>C NMR (126 MHz, DMSO-*d*<sub>6</sub>) δ 166.91, 155.21, 147.70, 147.63, 124.63, 119.30, 67.48, 53.85, 44.32, 36.52, 33.56, 29.54, 28.97. Chemical Formula of [M+H]<sup>+</sup>: C<sub>15</sub>H<sub>22</sub>N<sub>3</sub>O<sub>2</sub>S<sup>+</sup>; Exact Mass (calculated): 308.1427; HRMS (ESI<sup>+</sup>) (found): 308.1432.

**tert-butyl (S,Z)-(1,4-dimethyl-4-(4-(oxetan-3-yl)thiophen-2-yl)-6-oxotetrahydropyrimidin-2(1H)-ylidene)carbamate (45)**

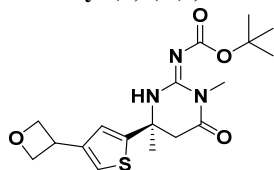

General procedure 7 was followed (with two times the scale) where 3-iodooxetane was used as alkyl-halide. LCMS R<sub>T</sub> = 0.90 min. (2 min. run); Chemical Formula of [M+H]<sup>+</sup>: C<sub>18</sub>H<sub>26</sub>N<sub>3</sub>O<sub>4</sub>S<sup>+</sup>; Exact Mass (calculated): 380.16; Exact Mass (ESI<sup>+</sup>) (found): 380.19. Reaction mixture was partitioned between EtOAc (4 mL) and water (1 mL). Aqueous layer was extracted with EtOAc (4 mL). The combined organic layers was concentrated with GeneVac to dryness. The residue was purified with Mass Directed HPLC system under formic acid condition (0.16% formic acid in both CH<sub>3</sub>CN and H<sub>2</sub>O, 15 min. run, 25 mL/min., 25 – 60% CH<sub>3</sub>CN). Boc-protecting group totally fell off during the process of drying down solvents using GeneVac. Provided the following compound **46**, (S)-2-imino-3,6-dimethyl-6-(4-(oxetan-3-yl)thiophen-2-yl)tetrahydropyrimidin-4(1H)-one (5.3 mg, 98% pure), colorless oil, as formic acid salt.

**(S)-2-imino-3,6-dimethyl-6-(4-(oxetan-3-yl)thiophen-2-yl)tetrahydropyrimidin-4(1H)-one (46)**

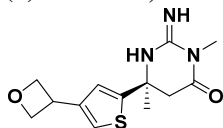

<sup>1</sup>H NMR (500 MHz, DMSO-*d*<sub>6</sub>) δ 8.22 (s, 1H) (exchangeable NH proton), 7.21 (s, 1H), 7.05 (s, 1H), 4.84 (dd, *J* = 8.3, 5.8 Hz, 2H), 4.56 (dt, *J* = 11.2, 6.4 Hz, 2H), 4.20 (p, *J* = 7.6 Hz, 1H), 3.05 (s, 3H), 2.99 (m, 1H), 2.92 (m, 1H), 1.52 (s, 3H). Chemical Formula of [M+H]<sup>+</sup>: C<sub>13</sub>H<sub>18</sub>N<sub>3</sub>O<sub>2</sub>S<sup>+</sup>; Exact Mass (calculated): 280.1114; HRMS (ESI<sup>+</sup>) (found): 280.1112. NOTE: There are fewer H atoms by NMR integration (16) than there are by HRMS [M+H]<sup>+</sup> (18) due to there are two exchangeable NH protons.

**tert-butyl (S,Z)-(1,4-dimethyl-6-oxo-4-(4-(2-(2-oxopyrrolidin-1-yl)ethyl)thiophen-2-yl)tetrahydropyrimidin-2(1H)-ylidene)carbamate (47)**

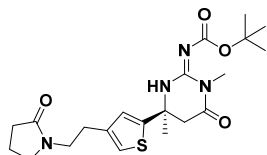

General procedure 7 was followed where 1-(2-bromoethyl)pyrrolidin-2-one was used as alkyl-halide. Reaction mixture was partitioned between EtOAc (2 mL) and water (0.5 mL). Aqueous layer was extracted with EtOAc (2 mL). The combined organic layers was concentrated with GeneVac to dryness. The residue was purified with Mass Directed HPLC system under TFA condition (0.16% TFA in both CH<sub>3</sub>CN and H<sub>2</sub>O, 12 min. run, 25 mL/min., 15 – 55% CH<sub>3</sub>CN), to afford 7.9 mg of light brown oil. Boc-protecting groups partially fell off. LCMS R<sub>T</sub> = 0.88 min. (2 min. run); Chemical Formula of [M+H]<sup>+</sup>: C<sub>21</sub>H<sub>31</sub>N<sub>4</sub>O<sub>4</sub>S<sup>+</sup>; Exact Mass (calculated): 435.21; **Exact Mass (ESI<sup>+</sup>)** (found): 435.33.

**(S)-2-imino-3,6-dimethyl-6-(4-(2-(2-oxopyrrolidin-1-yl)ethyl)thiophen-2-yl)tetrahydropyrimidin-4(1H)-one (48)**

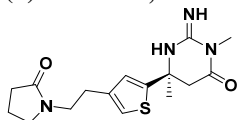

The residue of compound **47** (7.9 mg) was treated with TFA (0.4 mL) in CH<sub>2</sub>Cl<sub>2</sub> (0.6 mL), stirred at r.t. for 1 h. Volatiles were removed with GeneVac, to afford the title compound **48**, 6.5 mg (95% pure), light brown solid, as TFA salt. <sup>1</sup>H NMR (500 MHz, DMSO-*d*<sub>6</sub>) δ 8.68 (s, 2H), 7.19 (s, 1H), 6.96 (s, 1H), 3.46 – 3.29 (m, 2H), 3.28 – 3.19 (m, 4H), 3.13 (s, 3H), 2.71 (t, *J* = 7.1 Hz, 2H), 2.17 (t, *J* = 8.1 Hz, 2H), 1.87 (p, *J* = 7.4 Hz, 2H), 1.68 (s, 3H). Chemical Formula of [M+H]<sup>+</sup>: C<sub>16</sub>H<sub>23</sub>N<sub>4</sub>O<sub>2</sub>S<sup>+</sup>; Exact Mass (calculated): 335.1536; **HRMS (ESI<sup>+</sup>)** (found): 335.1539.

### III. Experimental Procedures and Spectroscopic Data of 6-chloro-4-(2,4-difluorophenyl)picolinonitrile Series

#### General Scheme 8: 16-member decarboxylative cross-coupling library using Integrated Photoreactor

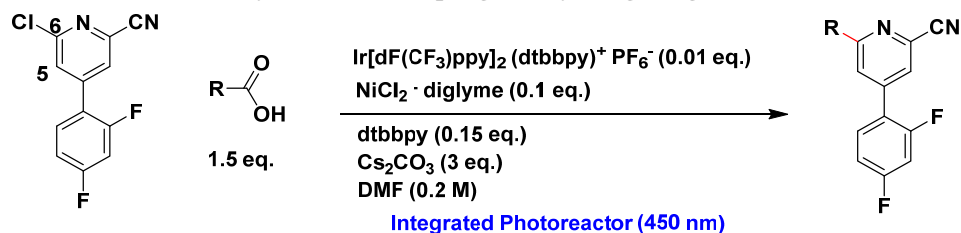

#### General Procedure 8:

A 2-dram vial equipped with a stir bar was charged with 6-chloro-4-(2,4-difluorophenyl)picolinonitrile (20 mg, 0.080 mmol), alkyl-carboxylic acid (1.5 eq.), 4,4'-di-*tert*-butyl-2,2'-bipyridine (0.15 eq.), (Ir[dF(CF<sub>3</sub>)ppy]<sub>2</sub>(dtbbpy))PF<sub>6</sub> (0.01 eq.), nickel(II) chloride ethylene glycol di-methyl ether complex (0.1 eq.) and cesium carbonate (3 eq.). It was transferred into glove box. Anhydrous DMF (0.2 M) was added into the reaction mixture. It was capped and taken out of glove box. Irradiated with Integrated Photoreactor, Royal Blue (450 nm) LED light for 1 h, with 100% LED light power. Stir rate was 1000 rpm. Fan rate was 4700 rpm. The reaction was checked with LCMS. If the reaction was not complete, the reaction mixture would be irradiated with Integrated Photoreactor for 1 more hour. The reactions were checked with LCMS. Reaction conversion was calculated based on AUC (area under curve) of LCMS spectra at 254 nm. Reaction Conversion = AUC of desired product / (AUC of desired product + AUC of by-product(s) + AUC of unreacted starting material). The following work-up procedure was applied. Reaction mixture was partitioned between EtOAc (2 mL) and water (0.5 mL). Aqueous layer was extracted with EtOAc (2 mL). The combined organic layers was concentrated with GeneVac to dryness. The residue was purified with Mass Directed semi-preparative HPLC system, to afford the desired product. It could also be purified with prep. TLC plate (in 25% EtOAc/heptane).

**Table 3. Percentage of desired product in crude reaction mixture for catalytic photoredox C(sp<sup>3</sup>)-C(sp<sup>2</sup>) cross-electrophile coupling with 16 aliphatic carboxylic acids using Integrated Photoreactor and Kessil Lamp**

|                                          |                                                                                   |                                                                                   |                                                                                   |                                                                                    |                                                                                     |                                                                                     |
|------------------------------------------|-----------------------------------------------------------------------------------|-----------------------------------------------------------------------------------|-----------------------------------------------------------------------------------|------------------------------------------------------------------------------------|-------------------------------------------------------------------------------------|-------------------------------------------------------------------------------------|
|                                          | 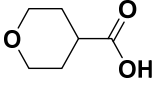 |  |  |  |  |  |
| <b>Kessil Lamp (16 hrs)</b>              | 92                                                                                | 58<br>(5:1)*                                                                      | 83                                                                                | 57<br>(5:1)*                                                                       | 0                                                                                   | 9                                                                                   |
| <b>Integrated Photoreactor (1-2 hrs)</b> | 94                                                                                | 58<br>(2:1)*                                                                      | 92                                                                                | 91<br>(6:1)*                                                                       | 17                                                                                  | 13                                                                                  |
|                                          |  |  |  |  |  |  |
| <b>Kessil Lamp (16 hrs)</b>              | 29<br>(1:1)*                                                                      | 21<br>(4:1)*                                                                      | 6                                                                                 | 27                                                                                 | 70                                                                                  | 76<br>(5:1)*                                                                        |
| <b>Integrated Photoreactor (1-2 hrs)</b> | 64<br>(1:1)*                                                                      | 47<br>(5:1)*                                                                      | 8                                                                                 | 57                                                                                 | 81                                                                                  | 80<br>(3:1)*                                                                        |
|                                          |  |  |  |  |                                                                                     |                                                                                     |
| <b>Kessil Lamp (16 hrs)</b>              | 87                                                                                | 81<br>(1:1)*                                                                      | 74<br>(2:1)*                                                                      | 71<br>(7:1)*                                                                       |                                                                                     |                                                                                     |
| <b>Integrated Photoreactor (1-2 hrs)</b> | 89                                                                                | 87<br>(1:1)*                                                                      | 86<br>(1:1)*                                                                      | 58<br>(7:1)*                                                                       |                                                                                     |                                                                                     |

(6-alkyl:5-alkyl)\*

## Examples:

### 4-(2,4-difluorophenyl)-6-(tetrahydro-2H-pyran-4-yl)picolinonitrile (49)

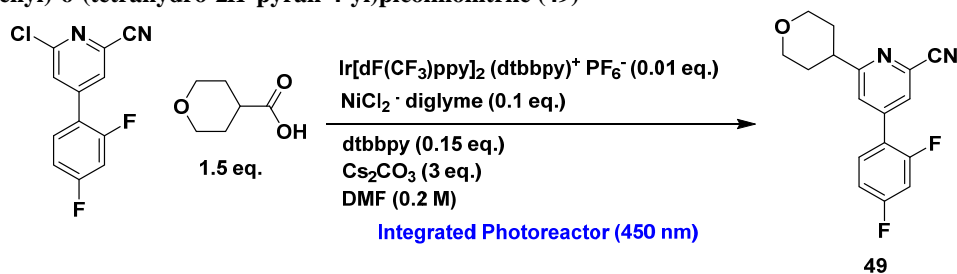

A 2-dram vial equipped with a stir bar was charged with 6-chloro-4-(2,4-difluorophenyl)picolinonitrile (20 mg, 0.080 mmol), tetrahydro-2H-pyran-4-carboxylic acid (15.58 mg, 0.120 mmol), 4,4'-di-*tert*-butyl-2,2'-bipyridine (3.21 mg, 0.012 mmol), (Ir[dF(CF<sub>3</sub>)ppy]<sub>2</sub>(dtbbpy))PF<sub>6</sub> (0.895 mg, 0.798 μmol), nickel(II) chloride ethylene glycol dimethyl ether complex (1.753 mg, 7.98 μmol) and cesium carbonate (78 mg, 0.239 mmol). It was transferred into glove box. Anhydrous DMF (399 μl) was added into the reaction mixture. It was taken out of glove box. Irradiated with Integrated Photoreactor, Royal Blue (450 nm) LED light for 30 min., 100% LED light power. Stir rate was 1000 rpm. Fan rate was 4700 rpm. The reaction mixture turned to reddish brown. The reaction mixture was partitioned between EtOAc (2 mL) and water (0.5 mL). Aqueous layer was extracted with EtOAc (2 mL). The combined organic layers was concentrated with rotovap under reduced pressure. The residue was purified with prep. TLC plate (in 25% EtOAc/heptane). The band containing desired product was scratched off, stirred with EtOAc (30 mL) for 0.5 h. Then filtered and the filtrate was concentrated with rotovap under reduced pressure to afford the desired product, compound **49**, 4-(2,4-difluorophenyl)-6-(tetrahydro-2H-pyran-4-yl)picolinonitrile, (22.3 mg, 0.074 mmol, 93% yield) as off-white solid. <sup>1</sup>H NMR (500 MHz, DMSO-*d*<sub>6</sub>) δ 8.12 (s, 1H), 7.86 (s, 1H), 7.85 – 7.80 (m, 1H), 7.51 (ddd, *J* = 11.5, 9.4, 2.5 Hz, 1H), 7.32 (td, *J* = 8.5, 2.4 Hz, 1H), 4.01 – 3.95 (m, 2H), 3.47 (td, *J* = 11.2, 3.4 Hz, 2H), 3.11 (tt, *J* = 10.2, 5.0 Hz, 1H), 1.86 – 1.74 (m, 4H). <sup>13</sup>C NMR (126 MHz, DMSO-*d*<sub>6</sub>) δ 167.12, 162.67, 159.04, 144.40, 132.92, 132.79, 126.90, 125.82, 121.21, 118.04, 113.02, 105.44, 67.36, 42.70, 32.00. Chemical Formula of [M+H]<sup>+</sup>: C<sub>17</sub>H<sub>15</sub>F<sub>2</sub>N<sub>2</sub>O<sup>+</sup>; Exact Mass (calculated): 301.1147; HRMS (ESI<sup>+</sup>) (found): 301.1145.

200 mg scale: 6-chloro-4-(2,4-difluorophenyl)picolinonitrile (200 mg, 0.80 mmol) was used in a 20 mL vial, following the same procedure. The reaction was complete in 45 min.. Reaction mixture was partitioned between EtOAc (20 mL) and water (5 mL). Aqueous layer was extracted with EtOAc (20 mL x 2). The combined organic layers was concentrated with GeneVac. The residue was purified with ISCO, using silica gel column, 40 g, Gold (20 - 40 μm), 0-40% EtOAc/hex. The fractions containing desired product were combined. Volatiles were removed with rotovap to afford the title compound **49**, 4-(2,4-difluorophenyl)-6-(tetrahydro-2H-pyran-4-yl)picolinonitrile (223.2 mg, 0.74 mmol, 93% yield) as off-white solid. R<sub>f</sub> = 0.33 (in 30% EtOAc/hex.).

500 mg scale: 6-chloro-4-(2,4-difluorophenyl)picolinonitrile (500 mg, 2.0 mmol) was used in a 40 mL vial, irradiated with Integrated Photoreactor, Royal Blue (450 nm) LED light for 2.5 h, following the same procedure as shown above. Reaction mixture was partitioned between EtOAc (20 mL) and water (5 mL). Aqueous layer was extracted with EtOAc (20 mL x 2). The combined organic layers was concentrated with GeneVac. The residue was purified with ISCO, using silica gel column, 80 g, Gold (20 - 40 μm), 0-30% EtOAc/hex. The fractions containing desired product were combined. Volatiles were removed with rotovap to afford the title compound **49**, 4-(2,4-difluorophenyl)-6-(tetrahydro-2H-pyran-4-yl)picolinonitrile (538.2 mg, 1.79 mmol, 90% yield) as off-white solid.

### 4-(2,4-difluorophenyl)-6-(tetrahydro-2H-pyran-2-yl)picolinonitrile (50)

### 4-(2,4-difluorophenyl)-5-(tetrahydro-2H-pyran-2-yl)picolinonitrile (51)

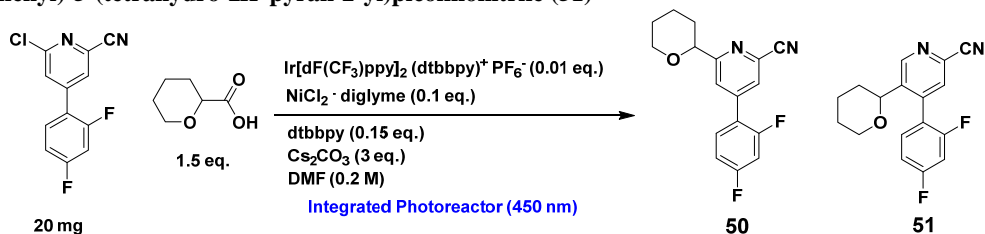

A 2-dram vial equipped with a stir bar was charged with 6-chloro-4-(2,4-difluorophenyl)picolinonitrile (20 mg, 0.080 mmol), 4,4'-di-*tert*-butyl-2,2'-bipyridine (3.21 mg, 0.012 mmol), (Ir[dF(CF<sub>3</sub>)ppy]<sub>2</sub>(dtbbpy))PF<sub>6</sub> (0.895 mg, 0.798 μmol), nickel(II) chloride ethylene glycol dimethyl ether complex (1.753 mg, 7.98 μmol) and cesium carbonate (78 mg, 0.239 mmol). It was transferred into glove box. Tetrahydropyran-2-carboxylic acid (15.58 mg, 0.120 mmol) and anhydrous DMF (399 μl) was added into the reaction mixture. It was taken out of glove box. Irradiated with Integrated Photoreactor, Royal Blue (450 nm) LED light for 2 h, 100% LED light power. Stir rate was 1000 rpm. Fan rate was 4700 rpm. The reaction was checked with LCMS. It was complete. The reaction mixture was partitioned between EtOAc (2 mL) and water (0.5 mL). Aqueous layer was extracted with EtOAc (2 mL). The combined organic layers was concentrated with GeneVac to dryness. The residue was purified with prep. TLC plate (in 25%



EtOAc/heptane). Two bands containing desired products were scratched off, stirred with EtOAc (30 mL) for 0.5 h, respectively. Then filtered and the filtrates were concentrated with rotovap under reduced pressure to afford compound **50** and **51**. They were further purified with Mass Directed semi-preparative HPLC system under TFA condition (0.16% TFA in both CH<sub>3</sub>CN and H<sub>2</sub>O, 12 min. run, 25 mL/min., 40 – 80% CH<sub>3</sub>CN), to afford 4-(2,4-difluorophenyl)-6-(tetrahydro-2H-pyran-2-yl)picolinonitrile, compound **50**, LCMS R<sub>T</sub> = 1.12 min. (2 min. run), as TFA salt (8 mg, 0.019 mmol, 24.20 % yield) as brown oil. <sup>1</sup>H NMR (500 MHz, DMSO-*d*<sub>6</sub>) δ 8.18 (s, 1H), 7.89 (s, 1H), 7.83 (td, *J* = 8.9, 6.6 Hz, 1H), 7.50 (ddd, *J* = 11.5, 9.3, 2.5 Hz, 1H), 7.31 (td, *J* = 8.5, 2.3 Hz, 1H), 4.51 (dd, *J* = 11.2, 2.1 Hz, 1H), 4.09 (d, *J* = 12.0 Hz, 1H), 3.61 (ddd, *J* = 11.3, 8.8, 6.2 Hz, 1H), 2.07 – 2.00 (m, 1H), 1.90 (m, 1H), 1.70 (m, 1H), 1.59 (m, 2H), 1.48 (qd, *J* = 12.7, 3.9 Hz, 1H). Chemical Formula of [M+H]<sup>+</sup>: C<sub>17</sub>H<sub>15</sub>F<sub>2</sub>N<sub>2</sub>O<sup>+</sup>; Exact Mass (calculated): 301.1147; **HRMS (ESI<sup>+</sup>)** (found): 301.1143. NOTE: <sup>1</sup>H NMR spectra showed peaks of NH<sub>4</sub>OH which was induced during HPLC fraction drying down with GeneVac system. And 4-(2,4-difluorophenyl)-5-(tetrahydro-2H-pyran-2-yl)picolinonitrile, compound **51**, LCMS R<sub>T</sub> = 1.04 min. (2 min. run), as TFA salt (3.4 mg, 7.71 μmol, 9.67 % yield) as light brown oil. <sup>1</sup>H NMR (500 MHz, DMSO-*d*<sub>6</sub>) δ 8.92 (s, 1H), 8.03 (s, 1H), 7.57 – 7.46 (m, 2H), 7.29 (td, *J* = 8.4, 2.0 Hz, 1H), 4.23 (d, *J* = 13.0 Hz, 1H), 3.98 (dd, *J* = 11.4, 4.2 Hz, 1H), 3.35 (td, *J* = 11.9, 2.5 Hz, 1H), 1.78 (d, *J* = 12.7 Hz, 1H), 1.61 – 1.44 (m, 4H), 1.44 – 1.31 (m, 1H). Chemical Formula of [M+H]<sup>+</sup>: C<sub>17</sub>H<sub>15</sub>F<sub>2</sub>N<sub>2</sub>O<sup>+</sup>; Exact Mass (calculated): 301.1147; **HRMS (ESI<sup>+</sup>)** (found): 301.1144.

#### 4-(2,4-difluorophenyl)-6-(tetrahydro-2H-pyran-3-yl)picolinonitrile (**52**)

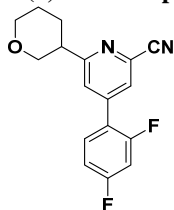

General procedure 8 was followed where tetrahydro-2H-pyran-3-carboxylic acid was used as alkyl-carboxylic acid. It was purified with Mass Directed HPLC system under NH<sub>4</sub>OH condition (0.16% NH<sub>4</sub>OH in both CH<sub>3</sub>CN and H<sub>2</sub>O, 12 min. run, 25 mL/min., 40 – 75% CH<sub>3</sub>CN), to afford 18.2 mg of light brown oil. It was further purified with prep. TLC plate (in 30% EtOAc/heptane), to afford the title compound **52**, 4-(2,4-difluorophenyl)-6-(tetrahydro-2H-pyran-3-yl)picolinonitrile (14.4 mg, 95% pure) as colorless oil. <sup>1</sup>H NMR (500 MHz, DMSO-*d*<sub>6</sub>) δ 8.12 (s, 1H), 7.90 (s, 1H), 7.83 (q, *J* = 8.5 Hz, 1H), 7.51 (t, *J* = 10.3 Hz, 1H), 7.32 (t, *J* = 8.4 Hz, 1H), 4.01 (d, *J* = 10.7 Hz, 1H), 3.88 (d, *J* = 11.0 Hz, 1H), 3.55 (t, *J* = 10.6 Hz, 1H), 3.42 (td, *J* = 10.8, 4.3 Hz, 1H), 3.16 – 3.07 (m, 1H), 2.09 – 2.02 (m, 1H), 1.90 (m, 1H), 1.71 – 1.63 (m, 2H). Chemical Formula of [M+H]<sup>+</sup>: C<sub>17</sub>H<sub>15</sub>F<sub>2</sub>N<sub>2</sub>O<sup>+</sup>; Exact Mass (calculated): 301.1147; **HRMS (ESI<sup>+</sup>)** (found): 301.1147.

#### 4-(2,4-difluorophenyl)-6-(1,4-dioxan-2-yl)picolinonitrile (**53**)

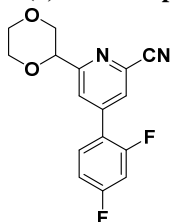

General procedure 8 was followed where 1,4-dioxane-2-carboxylic acid was used as alkyl-carboxylic acid. It was purified with Mass Directed HPLC system under TFA condition (0.16% TFA in both CH<sub>3</sub>CN and H<sub>2</sub>O, 12 min. run, 25 mL/min., 35 – 70% CH<sub>3</sub>CN), to afford the title compound **53**, LCMS R<sub>T</sub> = 0.97 min. (2 min. run), 4-(2,4-difluorophenyl)-6-(1,4-dioxan-2-yl)picolinonitrile as TFA salt (17.8 mg, 96% pure), light brown solid. <sup>1</sup>H NMR (500 MHz, DMSO-*d*<sub>6</sub>) δ 8.24 (t, *J* = 1.4 Hz, 1H), 7.97 – 7.92 (m, 1H), 7.84 (td, *J* = 8.9, 6.5 Hz, 1H), 7.51 (ddd, *J* = 11.6, 9.3, 2.6 Hz, 1H), 7.36 – 7.28 (m, 1H), 4.78 (dd, *J* = 9.9, 2.9 Hz, 1H), 4.06 (dd, *J* = 11.5, 3.0 Hz, 1H), 3.96 (dd, *J* = 11.8, 2.7 Hz, 1H), 3.84 (td, *J* = 11.4, 2.7 Hz, 1H), 3.82 – 3.75 (m, 1H), 3.62 (td, *J* = 11.5, 2.9 Hz, 1H), 3.51 (dd, *J* = 11.5, 9.9 Hz, 1H). Chemical Formula of [M+H]<sup>+</sup>: C<sub>16</sub>H<sub>13</sub>F<sub>2</sub>N<sub>2</sub>O<sub>2</sub><sup>+</sup>; Exact Mass (calculated): 303.0940; **HRMS (ESI<sup>+</sup>)** (found): 303.0939.

#### 4-(2,4-difluorophenyl)-5-(1,4-dioxan-2-yl)picolinonitrile (**54**)

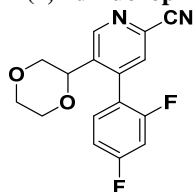

Compound **54** (3.0 mg, TFA salt, off-white solid, LCMS R<sub>T</sub> = 0.97 min. in 2 min. run) was obtained in the preparation of compound **53**. <sup>1</sup>H NMR (500 MHz, DMSO-*d*<sub>6</sub>) δ 8.96 (s, 1H), 8.08 (s, 1H), 7.60 – 7.49 (m, 2H), 7.32 (td, *J* = 8.5, 2.2 Hz, 1H), 4.49 – 4.42 (m, 1H), 3.89 – 3.83 (m, 1H), 3.71 – 3.66 (m, 1H), 3.65 – 3.56 (m, 3H), 3.49 (m, 1H). Chemical Formula of [M+H]<sup>+</sup>: C<sub>16</sub>H<sub>13</sub>F<sub>2</sub>N<sub>2</sub>O<sub>2</sub><sup>+</sup>; Exact Mass (calculated): 303.0940; **HRMS (ESI<sup>+</sup>)** (found): 303.0939.

#### 4-(2,4-difluorophenyl)-6-(4-fluorotetrahydro-2H-pyran-4-yl)picolinonitrile (55)

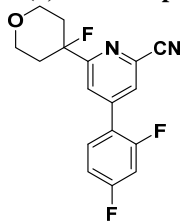

General procedure 8 was followed in a larger scale (80 mg of 6-chloro-4-(2,4-difluorophenyl)picolinonitrile) where 4-fluorotetrahydro-2H-pyran-4-carboxylic acid was used as alkyl-carboxylic acid. Irradiated with Royal Blue (450nm) LED light for 4 h. It was purified with ISCO, using silica gel column, 40 g, Gold (20 - 40  $\mu$ m), 0-30% EtOAc/hex. The fractions containing desired product were combined. Volatiles were removed with rotovap to afford the title compound **55**, 4-(2,4-difluorophenyl)-6-(4-fluorotetrahydro-2H-pyran-4-yl)picolinonitrile (10.2 mg, 95% pure) as off-white solid.  $^1\text{H NMR}$  (500 MHz, DMSO- $d_6$ )  $\delta$  8.29 (m, 1H), 8.06 (q,  $J = 1.3$  Hz, 1H), 7.88 (td,  $J = 8.9, 6.4$  Hz, 1H), 7.52 (ddd,  $J = 11.6, 9.3, 2.6$  Hz, 1H), 7.37 - 7.29 (m, 1H), 3.95 - 3.88 (m, 2H), 3.72 (td,  $J = 11.9, 2.1$  Hz, 2H), 2.38 - 2.15 (m, 2H), 2.02 - 1.90 (m, 2H).  $^{13}\text{C NMR}$  (126 MHz, DMSO- $d_6$ )  $\delta$  163.97, 145.33, 132.96, 132.84, 128.27, 122.93, 117.66, 113.15, 105.50, 63.14, 35.22, 35.05, 29.41. Chemical Formula of  $[\text{M}+\text{H}]^+$ :  $\text{C}_{17}\text{H}_{14}\text{F}_3\text{N}_2\text{O}^+$ ; Exact Mass (calculated): 319.1053; **HRMS (ESI $^+$ )** (found): 319.1050.

#### 4-(2,4-difluorophenyl)-6-(4-methyltetrahydro-2H-pyran-4-yl)picolinonitrile (56)

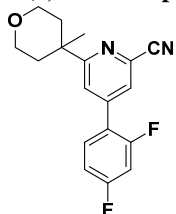

General procedure 8 was followed where 4-methyltetrahydro-2H-pyran-4-carboxylic acid was used as alkyl-carboxylic acid. It was purified with Mass Directed HPLC system under TFA condition (0.16% TFA in both  $\text{CH}_3\text{CN}$  and  $\text{H}_2\text{O}$ , 12 min. run, 25 mL/min., 40 - 80%  $\text{CH}_3\text{CN}$ ), to afford the title compound **56**, 4-(2,4-difluorophenyl)-6-(4-methyltetrahydro-2H-pyran-4-yl)picolinonitrile, as TFA salt (4.2 mg, 90% pure), brown oil.  $^1\text{H NMR}$  (500 MHz, DMSO- $d_6$ )  $\delta$  8.11 (m, 1H), 7.95 (m, 1H), 7.85 (td,  $J = 8.9, 6.5$  Hz, 1H), 7.50 (ddd,  $J = 11.5, 9.3, 2.6$  Hz, 1H), 7.32 (td,  $J = 8.5, 2.5$  Hz, 1H), 3.71 (ddd,  $J = 11.1, 7.0, 3.4$  Hz, 2H), 3.48 (ddd,  $J = 11.3, 7.6, 3.3$  Hz, 2H), 2.24 (ddd,  $J = 13.7, 7.2, 3.4$  Hz, 2H), 1.74 (ddd,  $J = 13.6, 7.6, 3.4$  Hz, 2H), 1.32 (s, 3H). Chemical Formula of  $[\text{M}+\text{H}]^+$ :  $\text{C}_{18}\text{H}_{17}\text{F}_2\text{N}_2\text{O}^+$ ; Exact Mass (calculated): 315.1303; **HRMS (ESI $^+$ )** (found): 315.1307. NOTE:  $^1\text{H NMR}$  spectra showed peaks of  $\text{NH}_4\text{OH}$  which was induced during HPLC fraction drying down with GeneVac system.

#### *tert*-butyl 5-(6-cyano-4-(2,4-difluorophenyl)pyridin-2-yl)-2-azabicyclo[3.1.1]heptane-2-carboxylate (57)

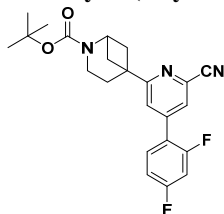

General procedure 8 was followed where 4-methyltetrahydro-2H-pyran-4-carboxylic acid was used as alkyl-carboxylic acid. It was purified with Mass Directed HPLC system under TFA condition (0.16% TFA in both  $\text{CH}_3\text{CN}$  and  $\text{H}_2\text{O}$ , 12 min. run, 25 mL/min., 30 - 70%  $\text{CH}_3\text{CN}$ ), to afford 4.8 mg (90% pure, TFA salt) of dark brown oil, LCMS  $R_T = 1.19$  min. (2 min. run). It was further purified with prep. TLC plate (in 25% EtOAc/heptane), to afford the title compound **57**, *tert*-butyl 5-(6-cyano-4-(2,4-difluorophenyl)pyridin-2-yl)-2-azabicyclo[3.1.1]heptane-2-carboxylate (2.4 mg, 90% pure) as off-white solid.  $^1\text{H NMR}$  (500 MHz, DMSO- $d_6$ )  $\delta$  8.11 (t,  $J = 1.4$  Hz, 1H), 7.83 (td,  $J = 8.8, 6.4$  Hz, 1H), 7.77 (t,  $J = 1.4$  Hz, 1H), 7.51 (ddd,  $J = 11.5, 9.2, 2.5$  Hz, 1H), 7.32 (td,  $J = 8.5, 2.6$  Hz, 1H), 4.42 (d,  $J = 40.3$  Hz, 1H), 3.73 (s, 2H), 2.49 (m, 2H), 2.27 (t,  $J = 7.0$  Hz, 2H), 2.08 (m, 2H), 1.46 - 1.41 (s, 9H). Chemical Formula of  $[\text{M}+\text{H}]^+$ :  $\text{C}_{23}\text{H}_{24}\text{F}_2\text{N}_3\text{O}_2^+$ ; Exact Mass (calculated): 412.1831; **HRMS (ESI $^+$ )** (found): 412.1837.

#### *tert*-butyl 5-(6-cyano-4-(2,4-difluorophenyl)pyridin-3-yl)-2-azabicyclo[3.1.1]heptane-2-carboxylate (58)

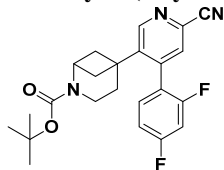

Compound **58** (6.9 mg, TFA salt, light brown solid, LCMS  $R_T = 1.13$  min. in 2 min. run) was obtained in the preparation of compound **57**. It was further purified with prep. TLC plate (in 25% EtOAc/heptane), to afford the title compound **58**, *tert*-butyl 5-(6-cyano-4-(2,4-difluorophenyl)pyridin-3-yl)-2-azabicyclo[3.1.1]heptane-2-carboxylate (3.9 mg, 85% pure) as off-white solid.  $^1\text{H NMR}$  (500 MHz, DMSO- $d_6$ )  $\delta$  8.64 (s, 1H), 7.94 (s, 1H), 7.51 – 7.39 (m, 2H), 7.23 (td,  $J = 8.4, 2.3$  Hz, 1H), 4.24 (d,  $J = 36.5$  Hz, 1H), 3.53 (s, 2H), 2.27 – 2.17 (m, 1H), 2.10 (m, 3H), 1.77 (s, 1H), 1.59 (s, 1H), 1.36 (m, 9H). Chemical Formula of  $[\text{M}+\text{H}]^+$ :  $\text{C}_{23}\text{H}_{24}\text{F}_2\text{N}_3\text{O}_2^+$ ; Exact Mass (calculated): 412.1831; **HRMS (ESI $^+$ )** (found): 412.1839.

#### 4-(2,4-difluorophenyl)-6-((1*R*,4*R*)-3-oxo-2-oxabicyclo[2.2.1]heptan-5-yl)picolinonitrile (**59**)

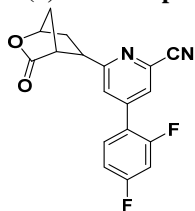

General procedure 8 was followed where 3-oxo-2-oxabicyclo[2.2.1]heptane-5-carboxylic acid was used as alkyl-carboxylic acid. It was purified with Mass Directed HPLC system under TFA condition (0.16% TFA in both  $\text{CH}_3\text{CN}$  and  $\text{H}_2\text{O}$ , 15 min. run, 25 mL/min., 30 – 75%  $\text{CH}_3\text{CN}$ ), to afford the title compound **59**, 4-(2,4-difluorophenyl)-6-((1*R*,4*R*)-3-oxo-2-oxabicyclo[2.2.1]heptan-5-yl)picolinonitrile (8.6 mg, 100% pure, LCMS  $R_T = 0.98$  min. in 2 min. run), as TFA salt, light brown solid.  $^1\text{H NMR}$  (500 MHz, DMSO- $d_6$ )  $\delta$  8.15 (t,  $J = 1.5$  Hz, 1H), 7.99 (m, 1H), 7.84 (td,  $J = 8.9, 6.4$  Hz, 1H), 7.48 (ddd,  $J = 11.5, 9.2, 2.6$  Hz, 1H), 7.31 (td,  $J = 8.7, 3.0$  Hz, 1H), 5.14 (t,  $J = 1.7$  Hz, 1H), 3.59 (dd,  $J = 8.8, 4.7$  Hz, 1H), 3.13 (s, 1H), 2.42 (ddd,  $J = 13.6, 4.7, 1.9$  Hz, 1H), 2.35 – 2.26 (m, 1H), 2.18 – 2.05 (m, 2H). Chemical Formula of  $[\text{M}+\text{H}]^+$ :  $\text{C}_{18}\text{H}_{13}\text{F}_2\text{N}_2\text{O}_2^+$ ; Exact Mass (calculated): 327.0940; **HRMS (ESI $^+$ )** (found): 327.0939.

#### 6-cyclobutyl-4-(2,4-difluorophenyl)picolinonitrile (**60**)

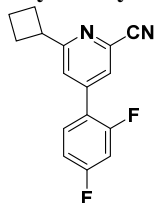

General procedure 8 was followed where cyclobutanecarboxylic acid was used as alkyl-carboxylic acid. It was purified with Mass Directed HPLC system under TFA condition (0.16% TFA in both  $\text{CH}_3\text{CN}$  and  $\text{H}_2\text{O}$ , 15 min. run, 25 mL/min., 45 – 85%  $\text{CH}_3\text{CN}$ ), to afford the title compound **60**, 6-cyclobutyl-4-(2,4-difluorophenyl)picolinonitrile (8.9 mg, 90% pure), as TFA salt, colorless oil.  $^1\text{H NMR}$  (500 MHz, DMSO- $d_6$ )  $\delta$  8.08 (t,  $J = 1.3$  Hz, 1H), 7.82 (td,  $J = 8.9, 6.5$  Hz, 1H), 7.78 (t,  $J = 1.3$  Hz, 1H), 7.49 (ddd,  $J = 11.6, 9.3, 2.5$  Hz, 1H), 7.31 (td,  $J = 8.2, 1.7$  Hz, 1H), 3.79 (p,  $J = 8.9$  Hz, 1H), 2.33 (td,  $J = 8.9, 6.0$  Hz, 4H), 2.09 – 2.00 (m, 1H), 1.93 – 1.84 (m, 1H). Chemical Formula of  $[\text{M}+\text{H}]^+$ :  $\text{C}_{16}\text{H}_{13}\text{F}_2\text{N}_2^+$ ; Exact Mass (calculated): 271.1041; **HRMS (ESI $^+$ )** (found): 271.1042.

#### 6-cyclopentyl-4-(2,4-difluorophenyl)picolinonitrile (**61**)

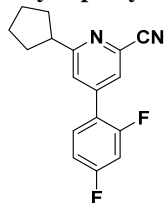

General procedure 8 was followed where cyclopentanecarboxylic acid was used as alkyl-carboxylic acid. It was purified with Mass Directed HPLC system under TFA condition (0.16% TFA in both  $\text{CH}_3\text{CN}$  and  $\text{H}_2\text{O}$ , 12 min. run, 25 mL/min., 26 – 79%  $\text{CH}_3\text{CN}$ ), to afford the title compound **61**, 6-cyclopentyl-4-(2,4-difluorophenyl)picolinonitrile (17.2 mg, 100% pure), as TFA salt, colorless oil.  $^1\text{H NMR}$  (500 MHz, DMSO- $d_6$ )  $\delta$  8.06 (t,  $J = 1.4$  Hz, 1H), 7.82 (dq,  $J = 5.2, 2.7$  Hz, 2H), 7.49 (ddd,  $J = 11.6, 9.3, 2.5$  Hz, 1H), 7.35 – 7.27 (m, 1H), 3.35 – 3.28 (m, 1H), 2.11 – 2.01 (m, 2H), 1.84 – 1.71 (m, 4H), 1.68 (m, 2H). Chemical Formula of  $[\text{M}+\text{H}]^+$ :  $\text{C}_{17}\text{H}_{15}\text{F}_2\text{N}_2^+$ ; Exact Mass (calculated): 285.1198; **HRMS (ESI $^+$ )** (found): 285.1201.

#### 4-(2,4-difluorophenyl)-6-(tetrahydrofuran-2-yl)picolinonitrile (**62**)

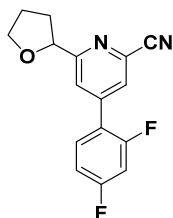

General procedure 8 was followed where tetrahydrofuran-2-carboxylic acid was used as alkyl-carboxylic acid. It was purified with Mass Directed HPLC system under TFA condition (0.16% TFA in both CH<sub>3</sub>CN and H<sub>2</sub>O, 15 min. run, 25 mL/min., 35 – 80% CH<sub>3</sub>CN), to afford the compound **62**, (11.8 mg), as TFA salt, brown oil. LCMS R<sub>T</sub> = 1.02 min. (2 min. run). It was further purified with prep. TLC plate (in 25% EtOAc/heptane), to afford the title compound **62**, 4-(2,4-difluorophenyl)-6-(tetrahydrofuran-2-yl)picolinonitrile, 6.4 mg, 95% pure, as off-white solid. <sup>1</sup>H NMR (500 MHz, DMSO-*d*<sub>6</sub>) δ 8.17 (s, 1H), 7.89 (s, 1H), 7.84 (td, *J* = 8.9, 6.5 Hz, 1H), 7.50 (ddd, *J* = 11.6, 9.3, 2.5 Hz, 1H), 7.35 – 7.27 (m, 1H), 5.01 (dd, *J* = 7.2, 5.6 Hz, 1H), 4.08 – 4.00 (m, 1H), 3.94 – 3.86 (m, 1H), 2.42 – 2.35 (m, 1H), 2.03 – 1.88 (m, 3H). Chemical Formula of [M+H]<sup>+</sup>: C<sub>16</sub>H<sub>13</sub>F<sub>2</sub>N<sub>2</sub>O<sup>+</sup>; Exact Mass (calculated): 287.0990; **HRMS (ESI<sup>+</sup>)** (found): 287.0994.

#### 4-(2,4-difluorophenyl)-5-(tetrahydrofuran-2-yl)picolinonitrile (**63**)

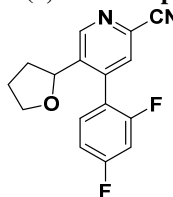

Compound **63** (5.7 mg, TFA salt, brown oil, LCMS R<sub>T</sub> = 0.97 min. in 2 min. run) was obtained in the preparation of compound **62**. It was further purified with prep. TLC plate (in 25% EtOAc/heptane), to afford the title compound **63**, *tert*-butyl 5-(6-cyano-4-(2,4-difluorophenyl)pyridin-3-yl)-2-azabicyclo[3.1.1]heptane-2-carboxylate (3.9 mg, 85% pure) as off-white solid. <sup>1</sup>H NMR (500 MHz, DMSO-*d*<sub>6</sub>) δ 8.90 (s, 1H), 8.02 (s, 1H), 7.55 – 7.46 (m, 2H), 7.31 – 7.26 (m, 1H), 4.74 (t, *J* = 7.4 Hz, 1H), 4.01 (dt, *J* = 8.1, 6.7 Hz, 1H), 3.75 (td, *J* = 7.8, 6.1 Hz, 1H), 2.05 – 1.98 (m, 1H), 1.97 – 1.91 (m, 1H), 1.90 – 1.83 (m, 1H), 1.64 (dq, *J* = 12.0, 7.9 Hz, 1H). Chemical Formula of [M+H]<sup>+</sup>: C<sub>16</sub>H<sub>13</sub>F<sub>2</sub>N<sub>2</sub>O<sup>+</sup>; Exact Mass (calculated): 287.0990; **HRMS (ESI<sup>+</sup>)** (found): 287.0992.

#### *tert*-butyl 2-(6-cyano-4-(2,4-difluorophenyl)pyridin-2-yl)azetidine-1-carboxylate (**64**)

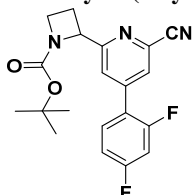

General procedure 8 was followed where 1-(*tert*-butoxycarbonyl)azetidine-2-carboxylic acid was used as alkyl-carboxylic acid. It was purified with Mass Directed HPLC system under NH<sub>4</sub>OH condition (0.16% NH<sub>4</sub>OH in both CH<sub>3</sub>CN and H<sub>2</sub>O, 12 min. run, 25 mL/min., 41 – 71% CH<sub>3</sub>CN), to afford the title compound **64**, *tert*-butyl 2-(6-cyano-4-(2,4-difluorophenyl)pyridin-2-yl)azetidine-1-carboxylate (23.8 mg, 100% pure), as light brown oil. <sup>1</sup>H NMR (500 MHz, DMSO-*d*<sub>6</sub>) δ 8.22 (t, *J* = 1.3 Hz, 1H), 7.96 (m, 1H), 7.83 (td, *J* = 8.9, 6.4 Hz, 1H), 7.53 (ddd, *J* = 11.6, 9.2, 2.6 Hz, 1H), 7.38 – 7.30 (m, 1H), 5.32 (dd, *J* = 8.9, 5.9 Hz, 1H), 4.05 – 3.89 (m, 2H), 2.70 – 2.59 (m, 1H), 2.25 (m, 1H), 1.20 (brs, 9H). Chemical Formula of [M+H]<sup>+</sup>: C<sub>20</sub>H<sub>20</sub>F<sub>2</sub>N<sub>3</sub>O<sub>2</sub><sup>+</sup>; Exact Mass (calculated): 372.1518; **HRMS (ESI<sup>+</sup>)** (found): 372.1525.

#### *tert*-butyl 2-(6-cyano-4-(2,4-difluorophenyl)pyridin-2-yl)pyrrolidine-1-carboxylate (**65**)

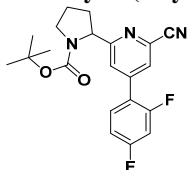

General procedure 8 was followed where (*tert*-butoxycarbonyl)proline was used as alkyl-carboxylic acid. It was purified with Mass Directed HPLC system under TFA condition (0.16% TFA in both CH<sub>3</sub>CN and H<sub>2</sub>O, 12 min. run, 25 mL/min., 45 – 80% CH<sub>3</sub>CN), to afford the compound **65**, (4.7 mg), as TFA salt, light brown oil. LCMS R<sub>T</sub> = 1.17 min. (2 min. run). It was further purified with prep. TLC plate (in 25% EtOAc/heptane), followed by microscale purification under TFA condition (0.16% TFA in both CH<sub>3</sub>CN and H<sub>2</sub>O, 6 min. run, 8 mL/min., 40 – 75% CH<sub>3</sub>CN) to afford the title compound **65**, *tert*-butyl 2-(6-cyano-4-(2,4-difluorophenyl)pyridin-2-yl)pyrrolidine-1-carboxylate (0.5 mg, TFA salt, as light brown solid). Chemical Formula of [M+H]<sup>+</sup>: C<sub>21</sub>H<sub>22</sub>F<sub>2</sub>N<sub>3</sub>O<sub>2</sub><sup>+</sup>; Exact Mass (calculated): 386.1675; **HRMS (ESI<sup>+</sup>)** (found): 386.1683. Boc-protecting group partially fell off. The

residue was treated with CH<sub>2</sub>Cl<sub>2</sub> (0.3 mL) and trifluoroacetic acid (0.2 mL). Shaked at 240 rpm at r.t. for 1 h to remove Boc group. Volatiles were removed with GeneVac to afford compound **66**, 4-(2,4-difluorophenyl)-6-(pyrrolidin-2-yl)picolinonitrile (0.5 mg, 90% pure, TFA salt, reddish brown solid).

#### 4-(2,4-difluorophenyl)-6-(pyrrolidin-2-yl)picolinonitrile (**66**)

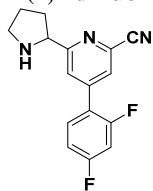

<sup>1</sup>H NMR (500 MHz, DMSO-*d*<sub>6</sub>) δ 9.01 (brs, 1H), 8.36 (m, 1H), 8.10 (m, 1H), 7.86 (td, *J* = 8.9, 6.5 Hz, 1H), 7.56 (ddd, *J* = 11.6, 9.3, 2.5 Hz, 1H), 7.41 – 7.33 (m, 1H), 4.95 (t, *J* = 7.5 Hz, 1H), 3.47 – 3.32 (m, 2H), 2.56 – 2.52 (m, 1H), 2.13 – 1.98 (m, 3H). Chemical Formula of [M+H]<sup>+</sup>: C<sub>16</sub>H<sub>14</sub>F<sub>2</sub>N<sub>3</sub><sup>+</sup>; Exact Mass (calculated): 286.1150; **HRMS (ESI<sup>+</sup>)** (found): 286.1163. NOTE: Due to low amount of the material, <sup>1</sup>H NMR spectra showed peaks of NH<sub>4</sub>OH which was induced during HPLC fraction drying down with GeneVac system.

#### *tert*-butyl 2-(6-cyano-4-(2,4-difluorophenyl)pyridin-3-yl)pyrrolidine-1-carboxylate (**67**)

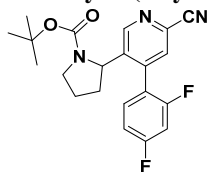

Compound **67** (5.0 mg, TFA salt, light brown oil) was prepared in the preparation of compound **65**. LCMS R<sub>T</sub> = 1.14 min. (2 min. run); Chemical Formula of [M+H]<sup>+</sup>: C<sub>21</sub>H<sub>22</sub>F<sub>2</sub>N<sub>3</sub>O<sub>2</sub><sup>+</sup>; Exact Mass (calculated): 386.17; **Exact Mass (ESI<sup>+</sup>)** (found): 386.09. It was lost during HPLC re-purification.

#### *tert*-butyl 2-(6-cyano-4-(2,4-difluorophenyl)pyridin-2-yl)piperidine-1-carboxylate (**68**)

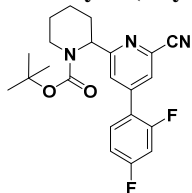

General procedure 8 was followed where 1-(*tert*-butoxycarbonyl)piperidine-2-carboxylic acid was used as alkyl-carboxylic acid. It was purified with Mass Directed HPLC system under TFA condition (0.16% TFA in both CH<sub>3</sub>CN and H<sub>2</sub>O, 12 min. run, 25 mL/min., 32 – 80% CH<sub>3</sub>CN), to afford the compound **68**, (6.1 mg, 93% pure), as TFA salt, light brown oil. LCMS R<sub>T</sub> = 1.23 min. (2 min. run). It was further purified with prep. TLC plate (in 25% EtOAc/heptane), followed by microscale purification under TFA condition (0.16% TFA in both CH<sub>3</sub>CN and H<sub>2</sub>O, 6 min. run, 8 mL/min., 50 – 85% CH<sub>3</sub>CN) to afford the title compound **68**, *tert*-butyl 2-(6-cyano-4-(2,4-difluorophenyl)pyridin-2-yl)piperidine-1-carboxylate (0.2 mg, TFA salt, colorless film). Chemical Formula of [M+H]<sup>+</sup>: C<sub>22</sub>H<sub>24</sub>F<sub>2</sub>N<sub>3</sub>O<sub>2</sub><sup>+</sup>; Exact Mass (calculated): 400.1831; **HRMS (ESI<sup>+</sup>)** (found): 400.1841. Boc-protecting group partially fell off. The residue was treated with CH<sub>2</sub>Cl<sub>2</sub> (0.3 mL) and trifluoroacetic acid (0.2 mL). Shaked at 240 rpm at r.t. for 1 h to remove Boc group. Volatiles were removed with GeneVac to afford compound **69**, 4-(2,4-difluorophenyl)-6-(piperidin-2-yl)picolinonitrile (0.2 mg, 99% pure, TFA salt, colorless film).

#### 4-(2,4-difluorophenyl)-6-(piperidin-2-yl)picolinonitrile (**69**)

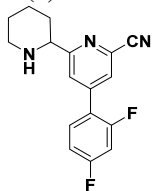

<sup>1</sup>H NMR (500 MHz, DMSO-*d*<sub>6</sub>) δ 9.06 (brs, 1H), 8.36 (m, 1H), 8.11 (m, 1H), 7.86 (td, *J* = 8.8, 6.5 Hz, 1H), 7.56 (ddd, *J* = 11.6, 9.3, 2.5 Hz, 1H), 7.37 (td, *J* = 8.5, 2.4 Hz, 1H), 4.59 – 4.57 (m, 1H), 3.42 – 3.40 (m, 1H), 3.11 – 3.02 (m, 1H), 2.28 – 2.22 (m, 1H), 1.96 – 1.86 (m, 1H), 1.84 – 1.81 (m, 1H), 1.77 – 1.64 (m, 3H). Chemical Formula of [M+H]<sup>+</sup>: C<sub>17</sub>H<sub>16</sub>F<sub>2</sub>N<sub>3</sub><sup>+</sup>; Exact Mass (calculated): 300.1307; **HRMS (ESI<sup>+</sup>)** (found): 300.1315. NOTE: Due to low amount of the material, <sup>1</sup>H NMR spectra showed peaks of NH<sub>4</sub>OH which was induced during HPLC fraction drying down with GeneVac system.

**tert-butyl 2-(6-cyano-4-(2,4-difluorophenyl)pyridin-3-yl)piperidine-1-carboxylate (70)**

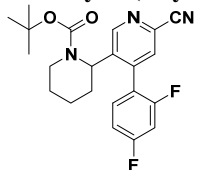

Compound **70** (9.6 mg, 90% pure, TFA salt, light brown oil) was prepared in the preparation of compound **68**. LCMS  $R_T = 1.17$  min. (2 min. run); Chemical Formula of  $[M+H]^+$ :  $C_{22}H_{24}F_2N_3O_2^+$ ; Exact Mass (calculated): 400.18; **Exact Mass (ESI<sup>+</sup>)** (found): 399.90. It was lost during HPLC re-purification.

**tert-butyl 3-(6-cyano-4-(2,4-difluorophenyl)pyridin-2-yl)morpholine-4-carboxylate (71)**

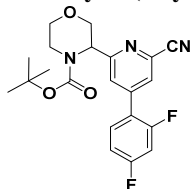

General procedure 8 was followed where 4-(*tert*-butoxycarbonyl)morpholine-3-carboxylic acid was used as alkyl-carboxylic acid. It was purified with Mass Directed HPLC system under  $NH_4OH$  condition (0.16%  $NH_4OH$  in both  $CH_3CN$  and  $H_2O$ , 12 min. run, 25 mL/min., 40 – 70%  $CH_3CN$ ), to afford 8.8 mg (90% pure) of compound **71**, LCMS  $R_T = 1.09$  min. (2 min. run). It was further purified with prep. TLC plate (in 25% EtOAc/heptane), to afford the title compound **71**, *tert*-butyl 3-(6-cyano-4-(2,4-difluorophenyl)pyridin-2-yl)morpholine-4-carboxylate (5.6 mg, 95% pure) as off-white film. **<sup>1</sup>H NMR** (500 MHz,  $DMSO-d_6$ )  $\delta$  8.19 (s, 1H), 7.87 – 7.79 (m, 2H), 7.52 (ddd,  $J = 11.6, 9.3, 2.5$  Hz, 1H), 7.37 – 7.29 (m, 1H), 5.09 (s, 1H), 4.48 (d,  $J = 12.1$  Hz, 1H), 3.83 (dd,  $J = 12.1, 3.9$  Hz, 2H), 3.75 – 3.68 (m, 1H), 3.49 (td,  $J = 11.7, 3.1$  Hz, 1H), 3.28 (m, 1H), 1.37 (s, 9H). Chemical Formula of  $[M+H]^+$ :  $C_{21}H_{22}F_2N_3O_3^+$ ; Exact Mass (calculated): 402.1624; **HRMS (ESI<sup>+</sup>)** (found): 402.1631.

**tert-butyl 3-(6-cyano-4-(2,4-difluorophenyl)pyridin-3-yl)morpholine-4-carboxylate (72)**

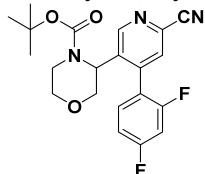

Compound **72** (0.8 mg, LCMS  $R_T = 1.04$  min. in 2 min. run) was obtained in the preparation of compound **71**. It was further purified with prep. TLC plate (in 25% EtOAc/heptane), to afford the title compound **72**, *tert*-butyl 3-(6-cyano-4-(2,4-difluorophenyl)pyridin-3-yl)morpholine-4-carboxylate (0.4 mg, 95% pure) as off-white film. **<sup>1</sup>H NMR** (500 MHz,  $DMSO-d_6$ )  $\delta$  8.97 (s, 1H), 8.04 (s, 1H), 7.51 – 7.41 (m, 2H), 7.26 (t,  $J = 7.3$  Hz, 1H), 4.94 (s, 1H), 3.98 (d,  $J = 12.2$  Hz, 1H), 3.83 (dt,  $J = 11.0, 2.3$  Hz, 1H), 3.63 (dd,  $J = 12.2, 4.1$  Hz, 1H), 3.47 (td,  $J = 11.4, 3.7$  Hz, 1H), 3.19 (ddd,  $J = 14.2, 10.8, 3.9$  Hz, 1H), 1.26 (s, 9H). Chemical Formula of  $[M+H]^+$ :  $C_{21}H_{22}F_2N_3O_3^+$ ; Exact Mass (calculated): 402.1624; **HRMS (ESI<sup>+</sup>)** (found): 402.1631.

**6-cyclopropyl-4-(2,4-difluorophenyl)picolinonitrile (73)**

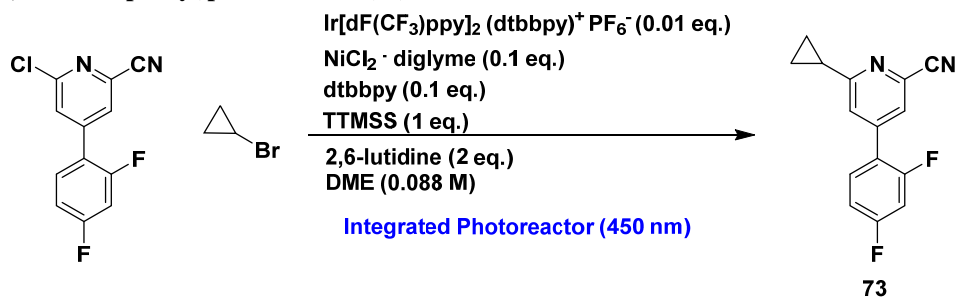

General procedure 6 was followed where 6-chloro-4-(2,4-difluorophenyl)picolinonitrile was used as aryl-halide and bromocyclopropane was used as alkyl-halide. It was purified with Mass Directed HPLC system under TFA condition (0.16% TFA in both  $CH_3CN$  and  $H_2O$ , 8 min. run, 25 mL/min., 50 – 85%  $CH_3CN$ ) to afford the title compound **73** as TFA salt, 1.9 mg (96% pure), as brown oil. **<sup>1</sup>H NMR** (500 MHz,  $DMSO-d_6$ )  $\delta$  7.98 (m, 1H), 7.85 (m, 1H), 7.81 (td,  $J = 8.8, 6.5$  Hz, 1H), 7.50 (ddd,  $J = 11.5, 9.3, 2.5$  Hz, 1H), 7.31 (td,  $J = 8.5, 2.5$  Hz, 1H), 2.29 (tt,  $J = 8.1, 4.8$  Hz, 1H), 1.12 – 1.06 (m, 2H), 1.03 (ddd,  $J = 7.3, 5.1, 2.8$  Hz, 2H). **<sup>13</sup>C NMR** (126 MHz,  $DMSO-d_6$ )  $\delta$  165.77, 143.71, 133.03, 132.84, 125.93, 125.67, 121.34, 118.08, 113.17, 105.44, 17.26, 11.36. Chemical Formula of  $[M+H]^+$ :  $C_{15}H_{11}F_2N_2^+$ ; Exact Mass (calculated): 257.0885; **HRMS (ESI<sup>+</sup>)** (found): 257.0883.

#### **IV. NMR Spectral Data for Novel Compounds**

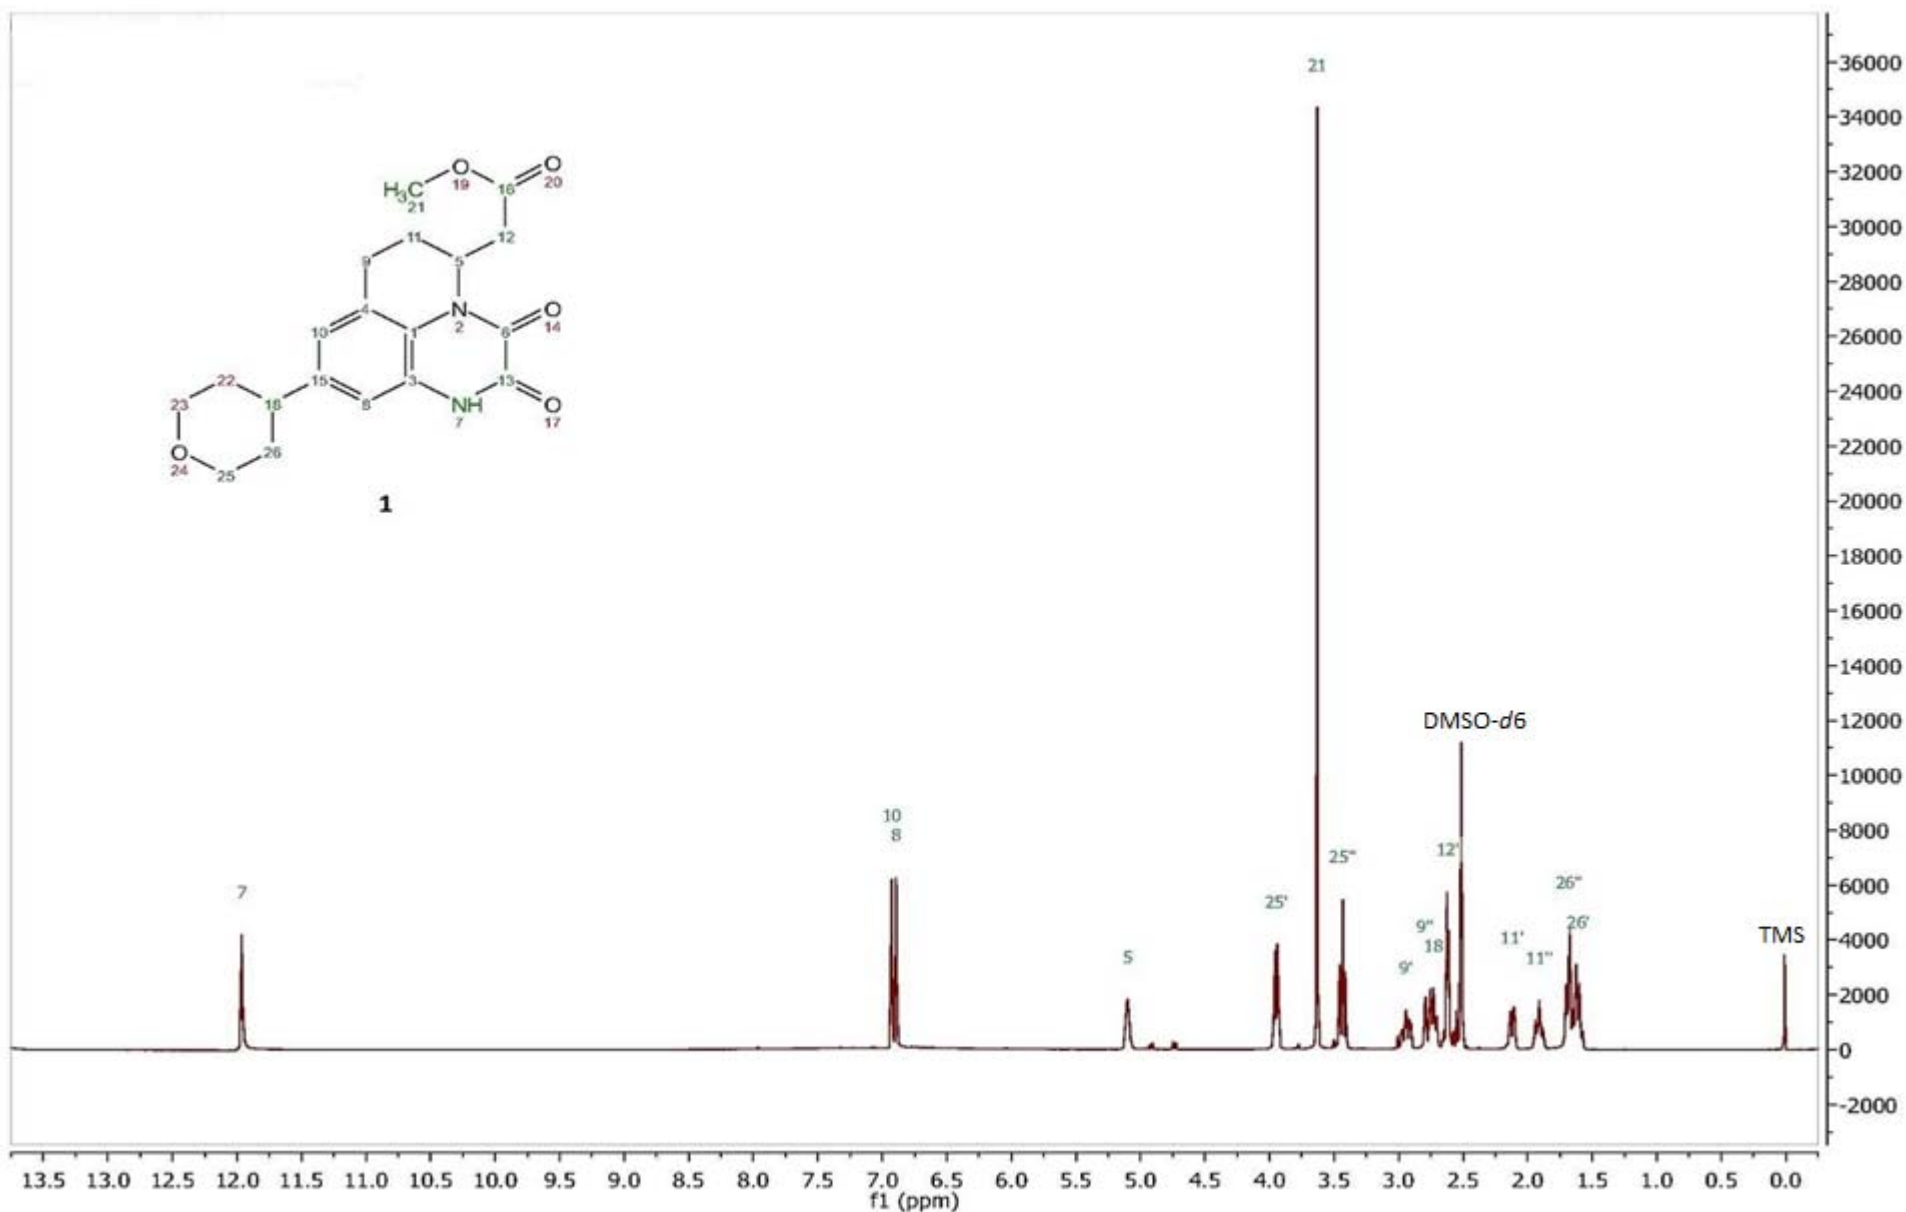

$^1\text{H NMR}$  of compound **1** in  $\text{DMSO-}d_6$



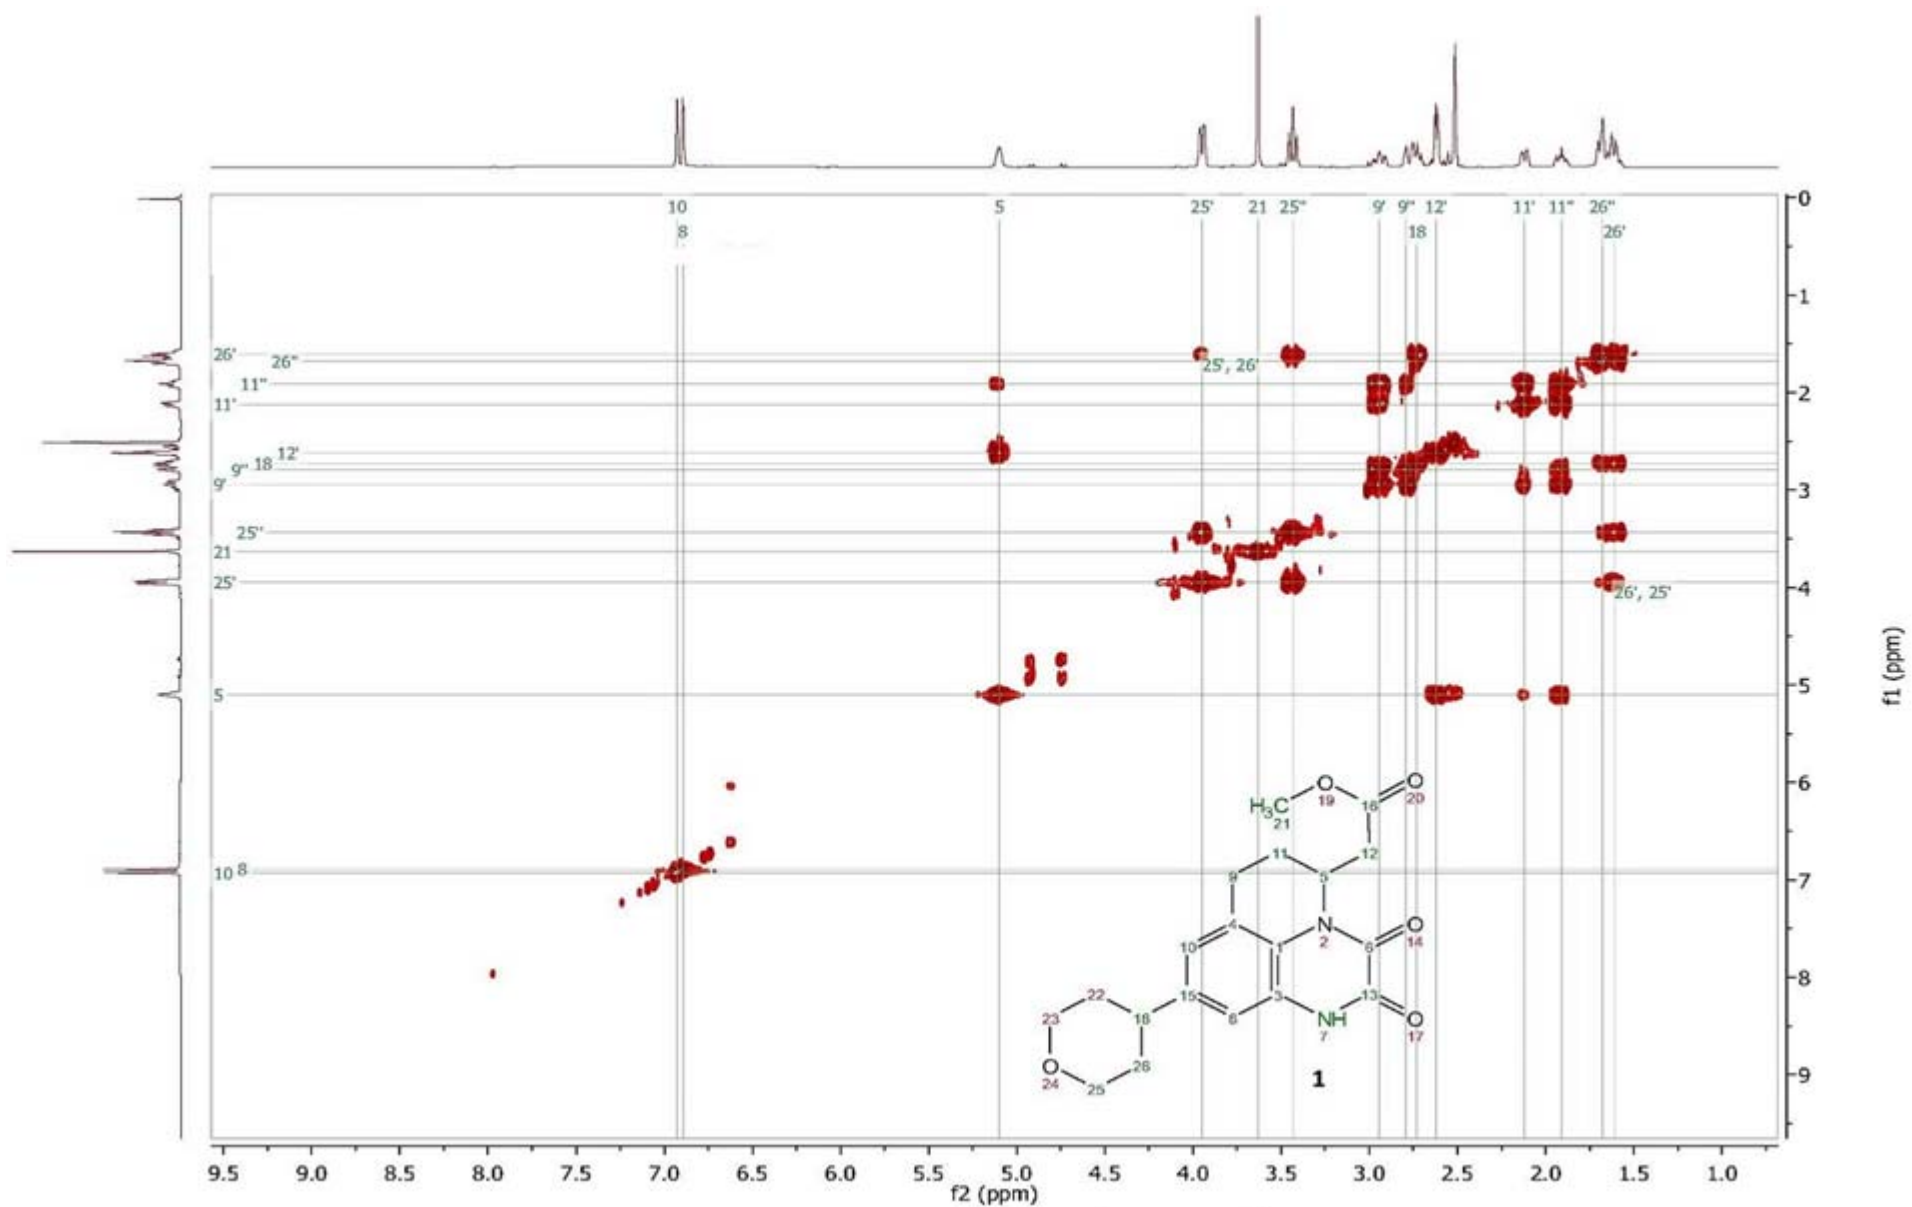

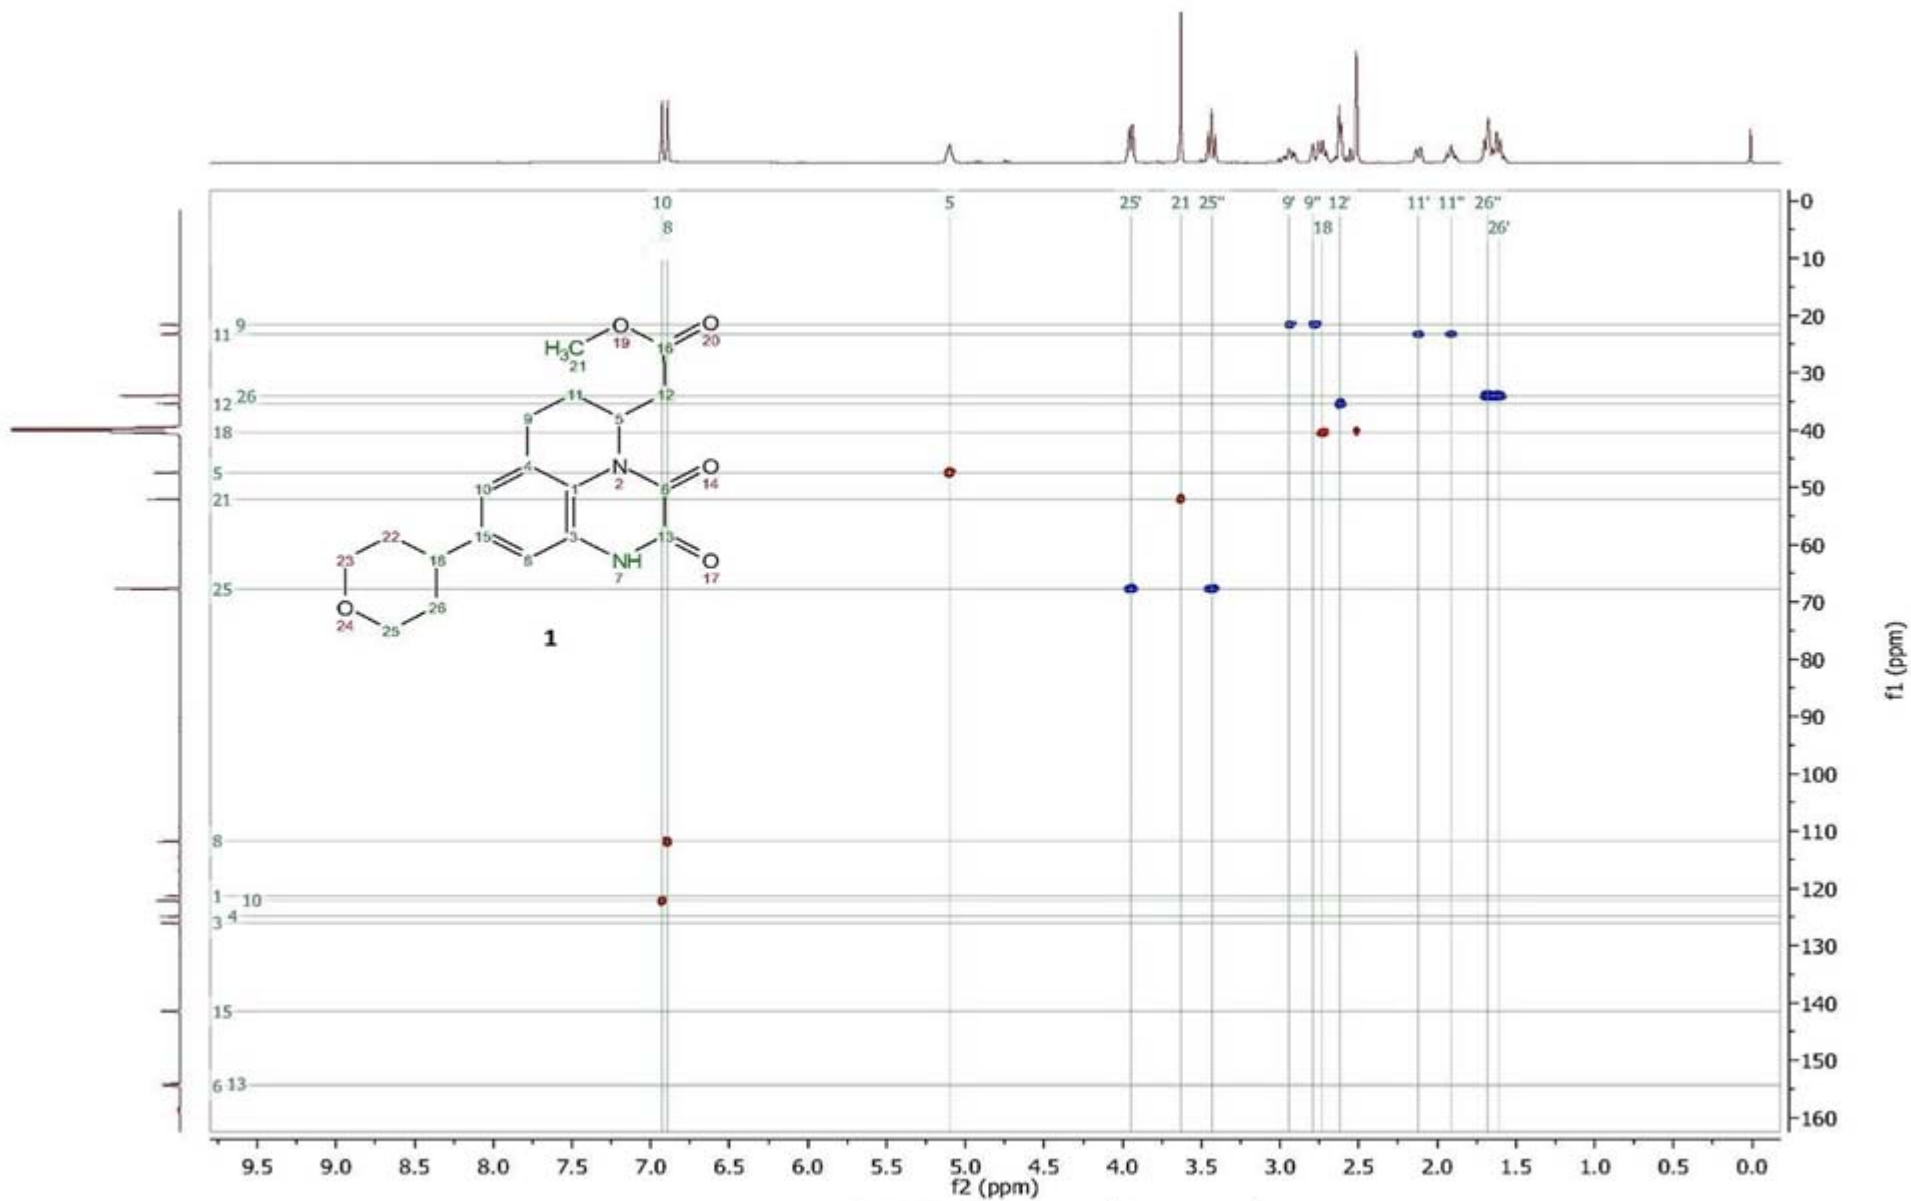

2D HSQC of compound **1** in DMSO-*d*<sub>6</sub>

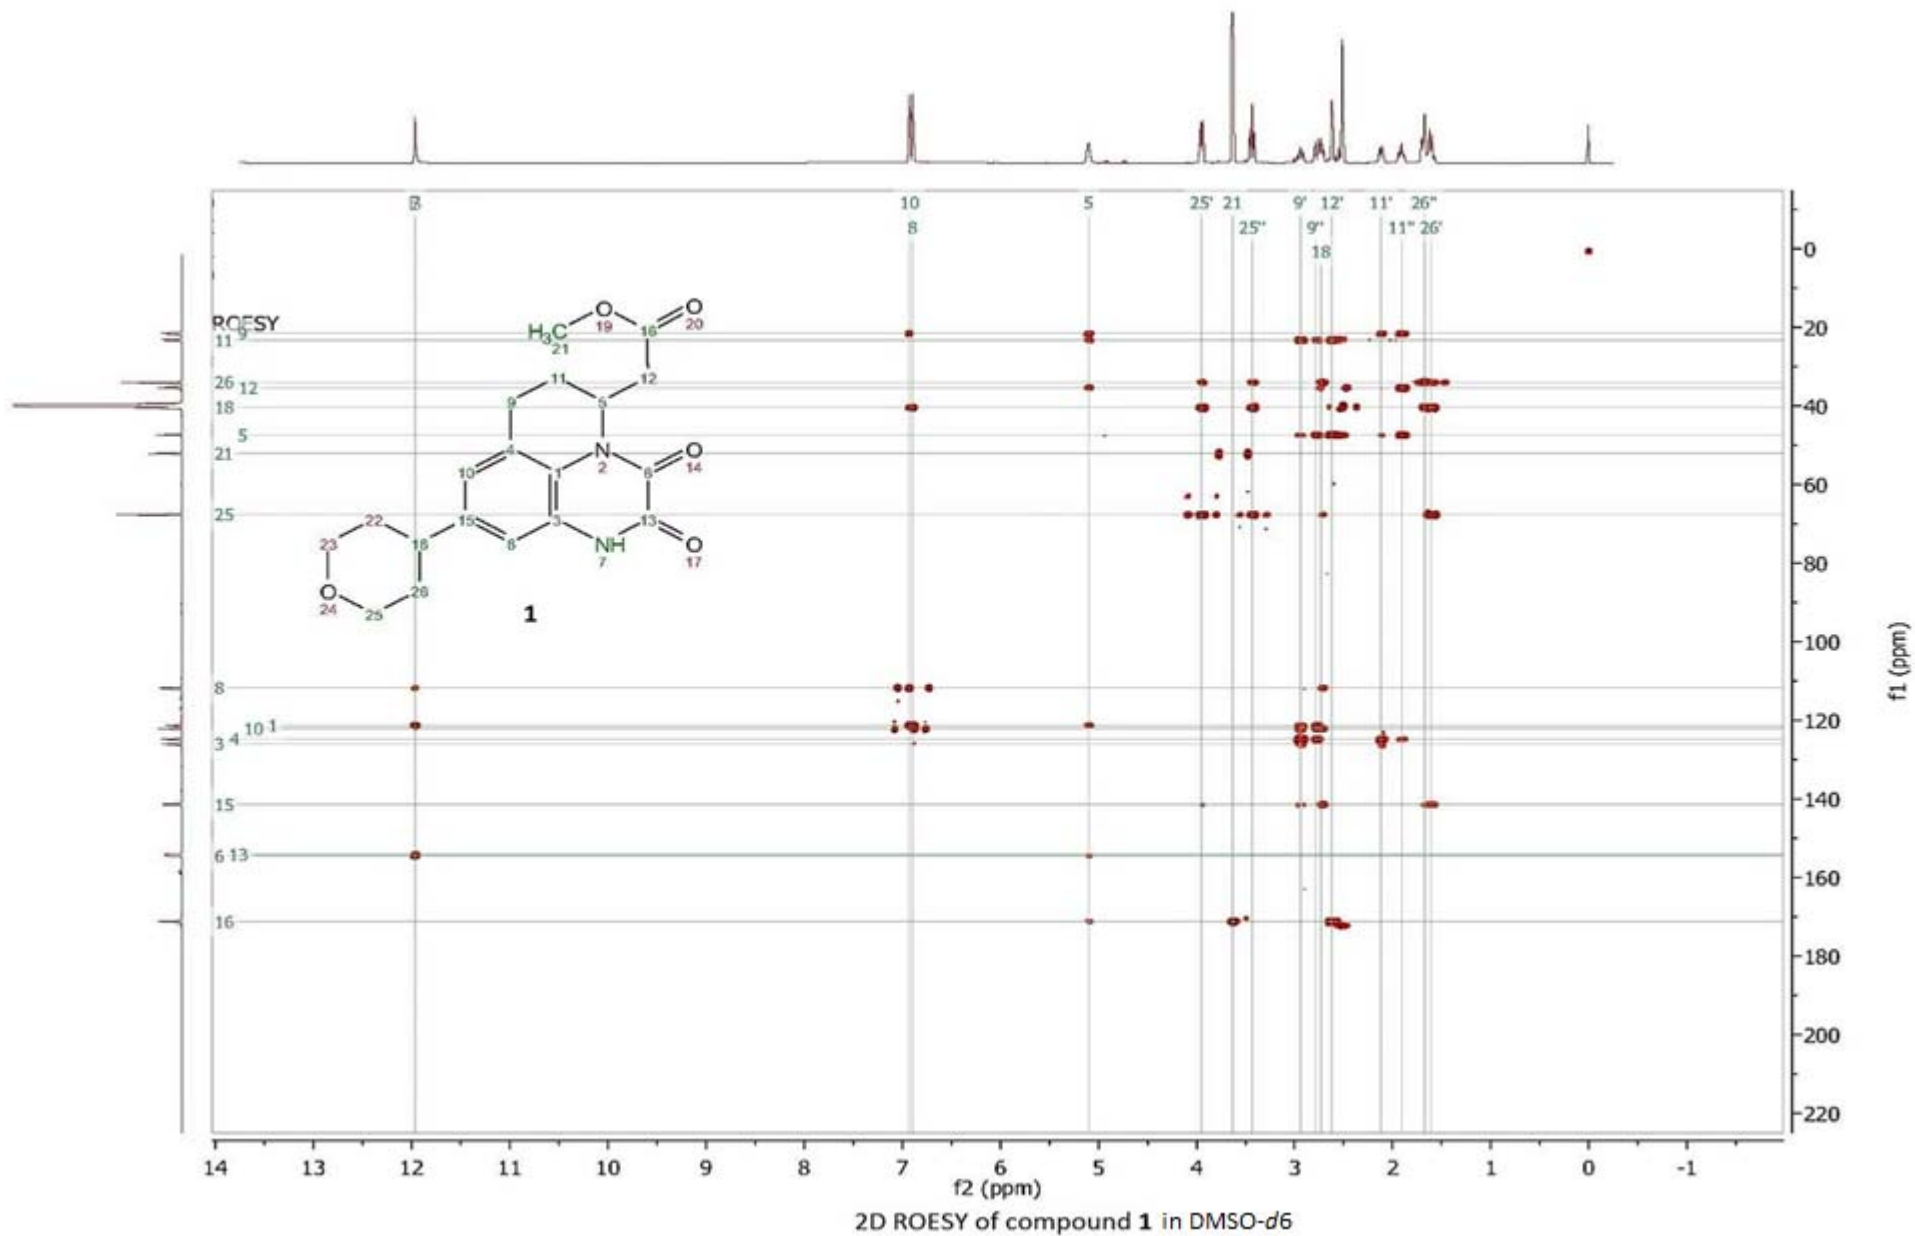

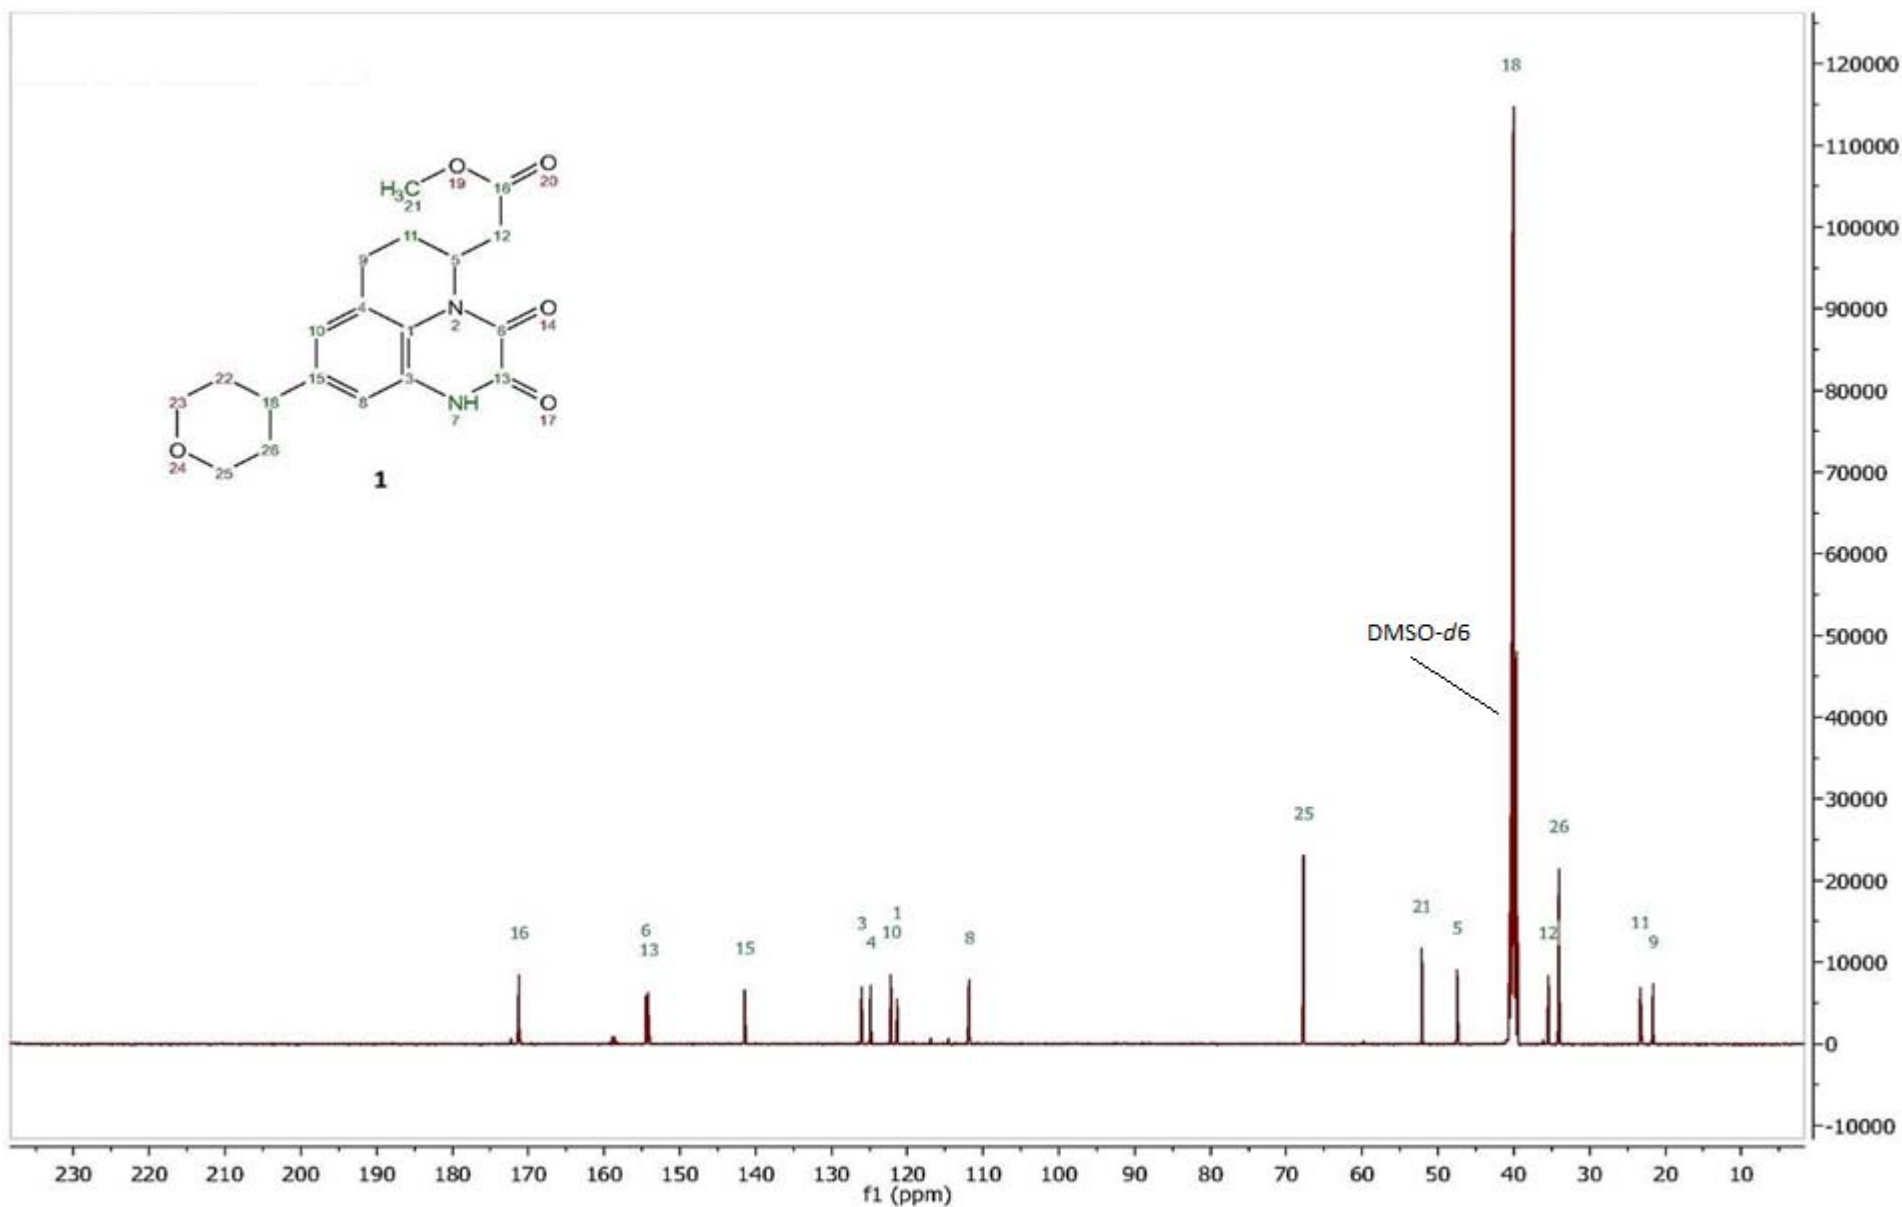

<sup>13</sup>C NMR of compound **1** in DMSO-*d*<sub>6</sub>

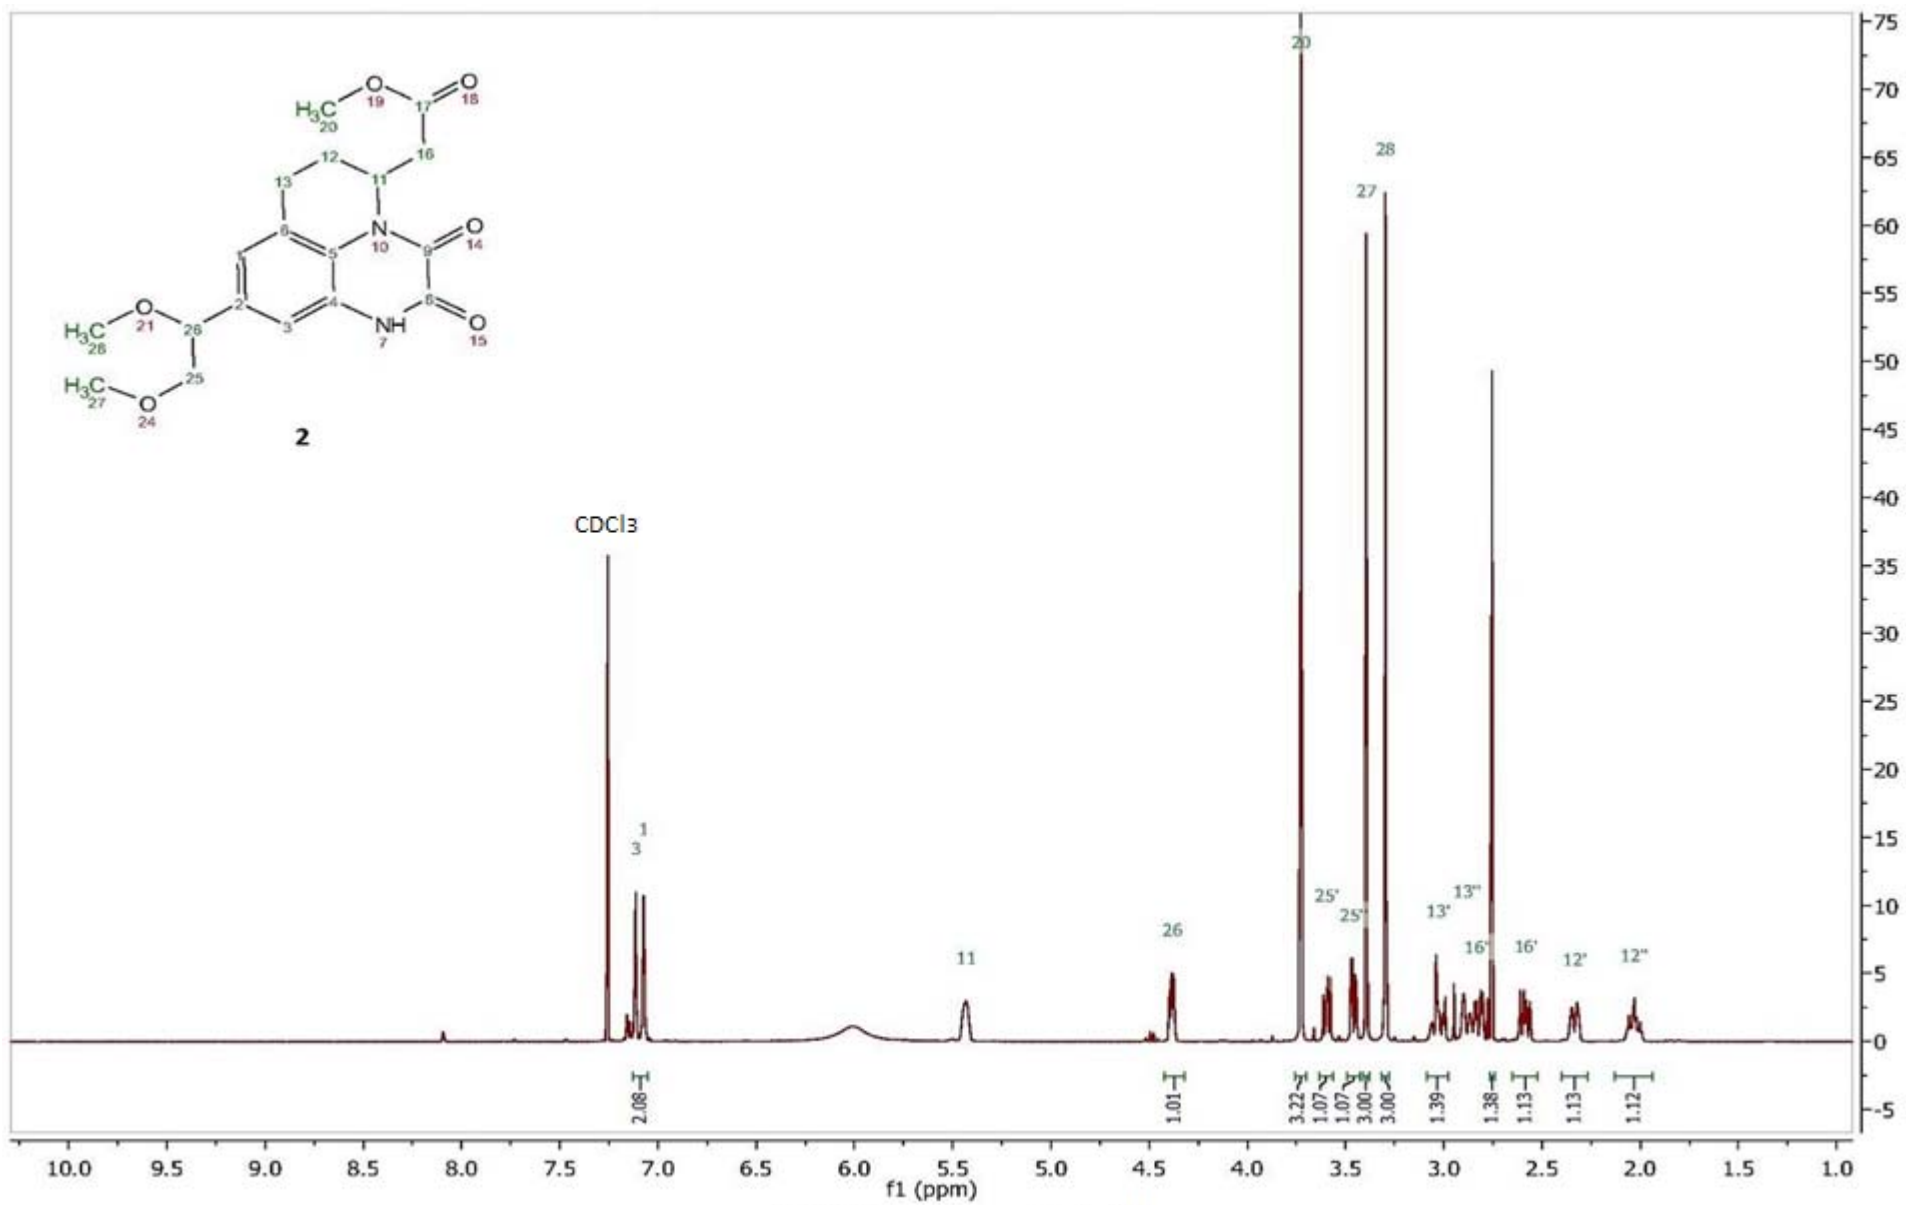

<sup>1</sup>H NMR of compound 2 in CDCl<sub>3</sub>

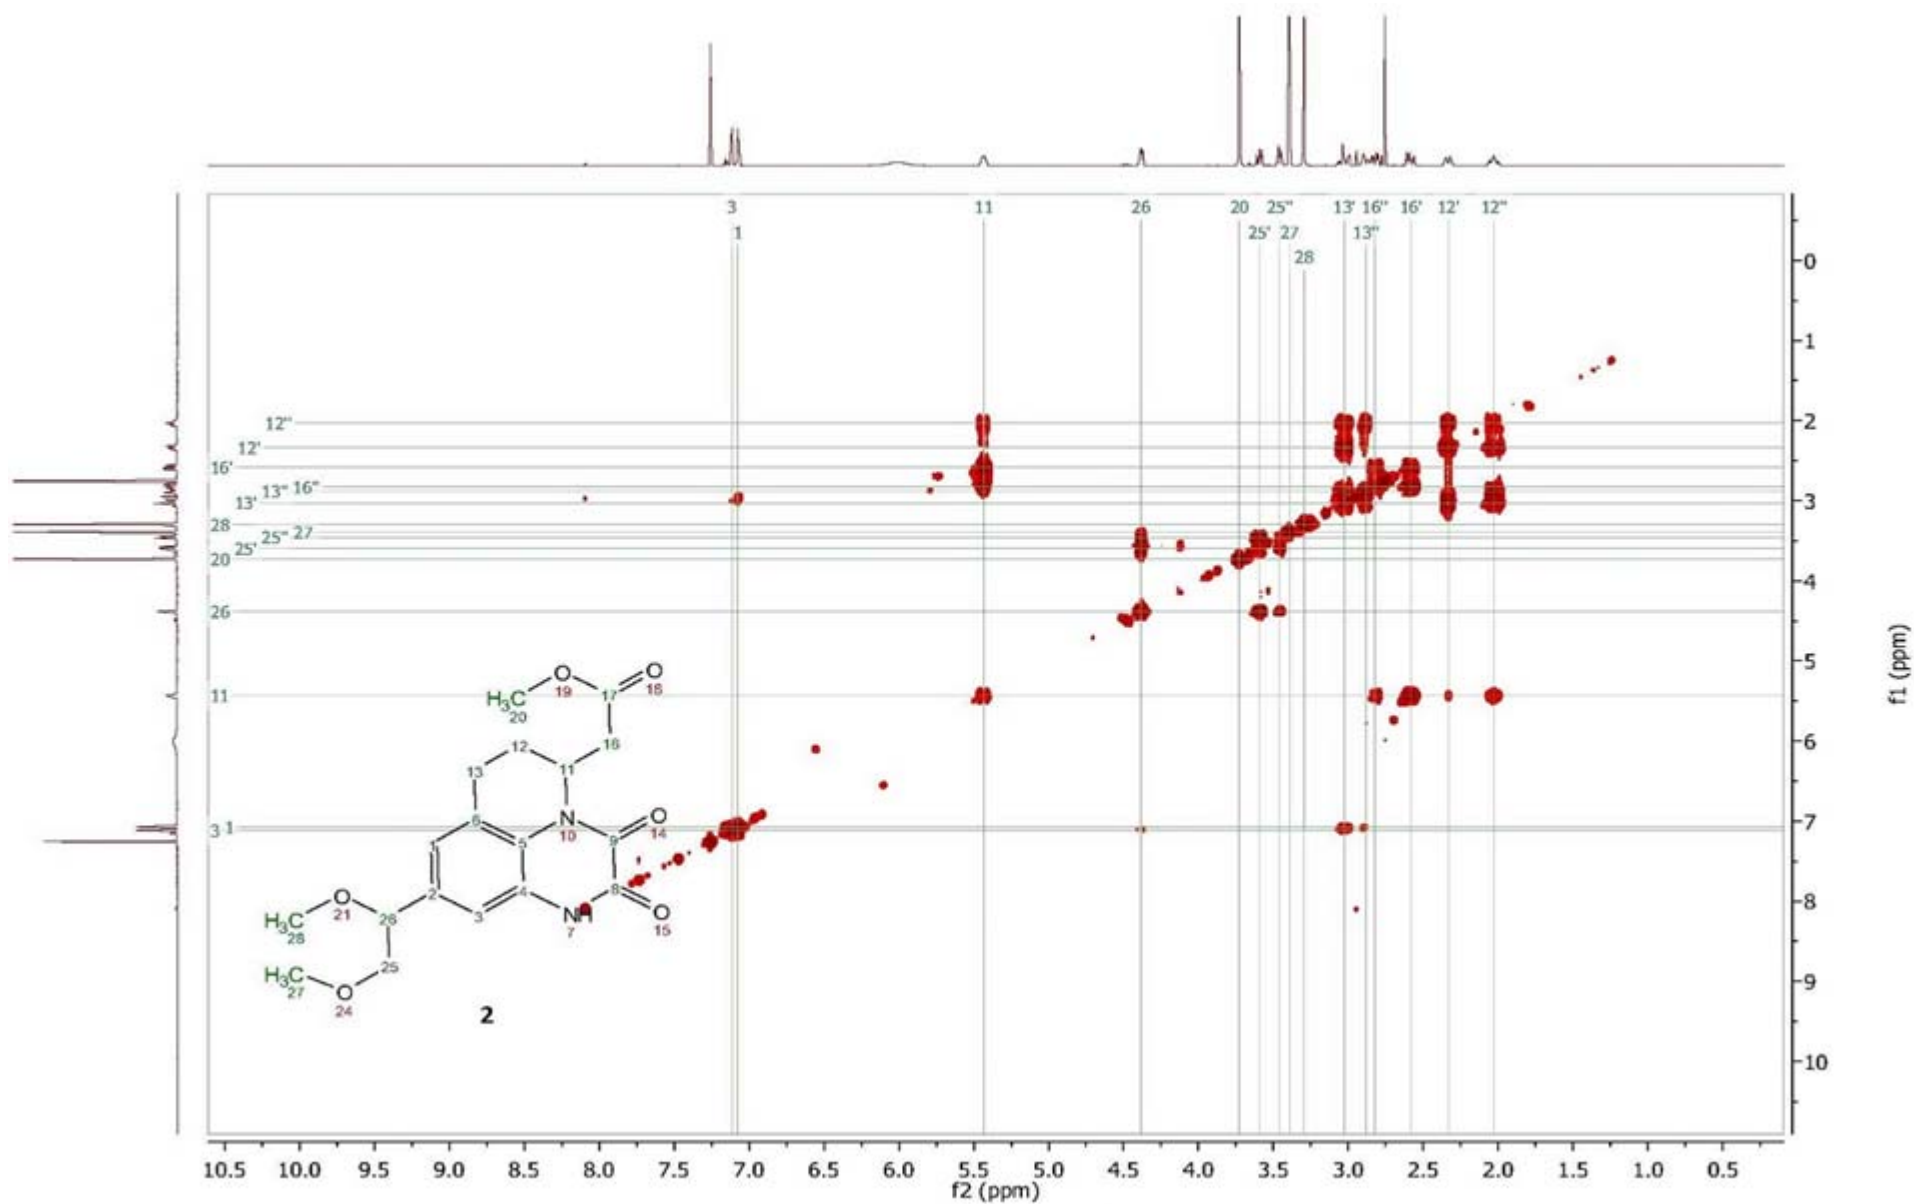

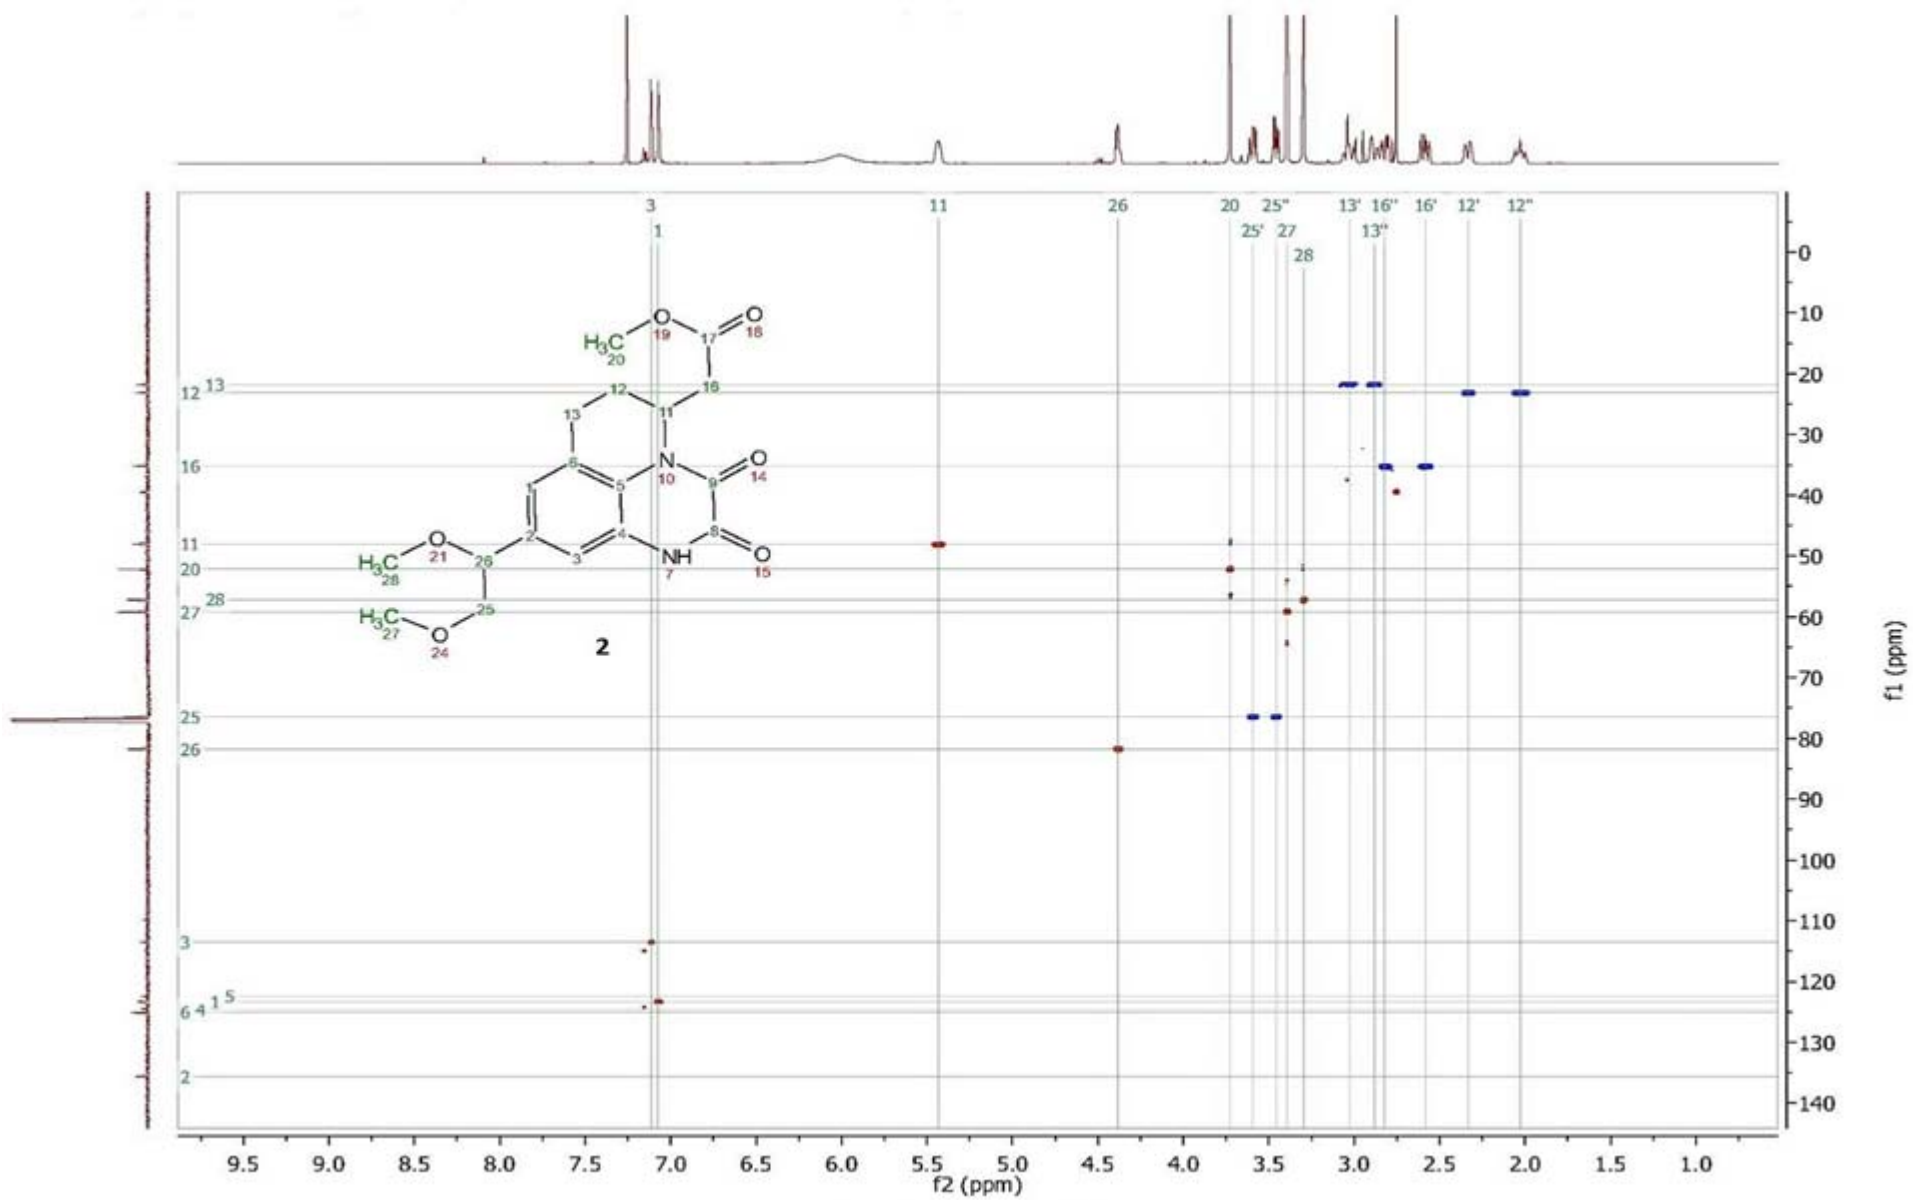

2D HSQC of compound 2 in CDCl<sub>3</sub>

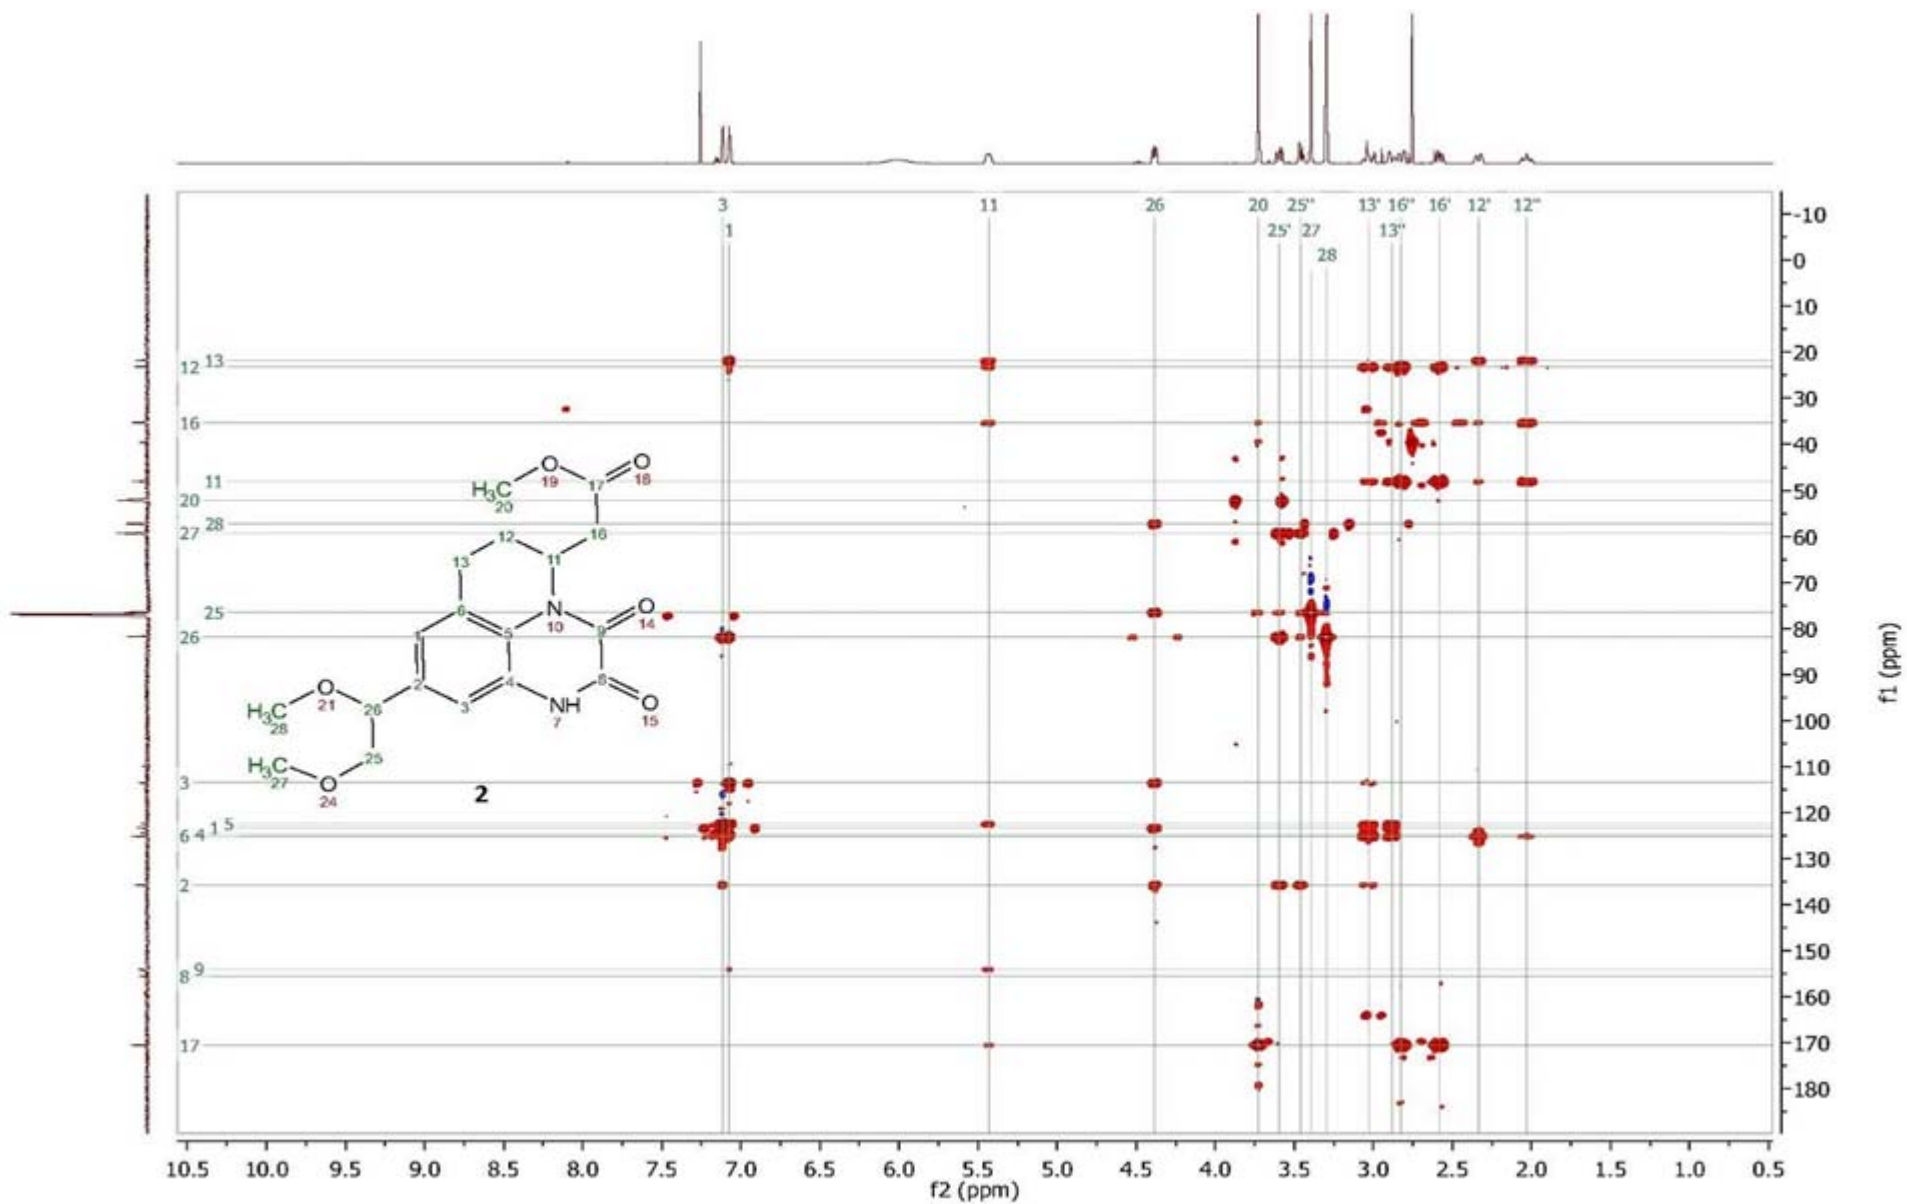

2D HMBC of compound **2** in CDCl<sub>3</sub>



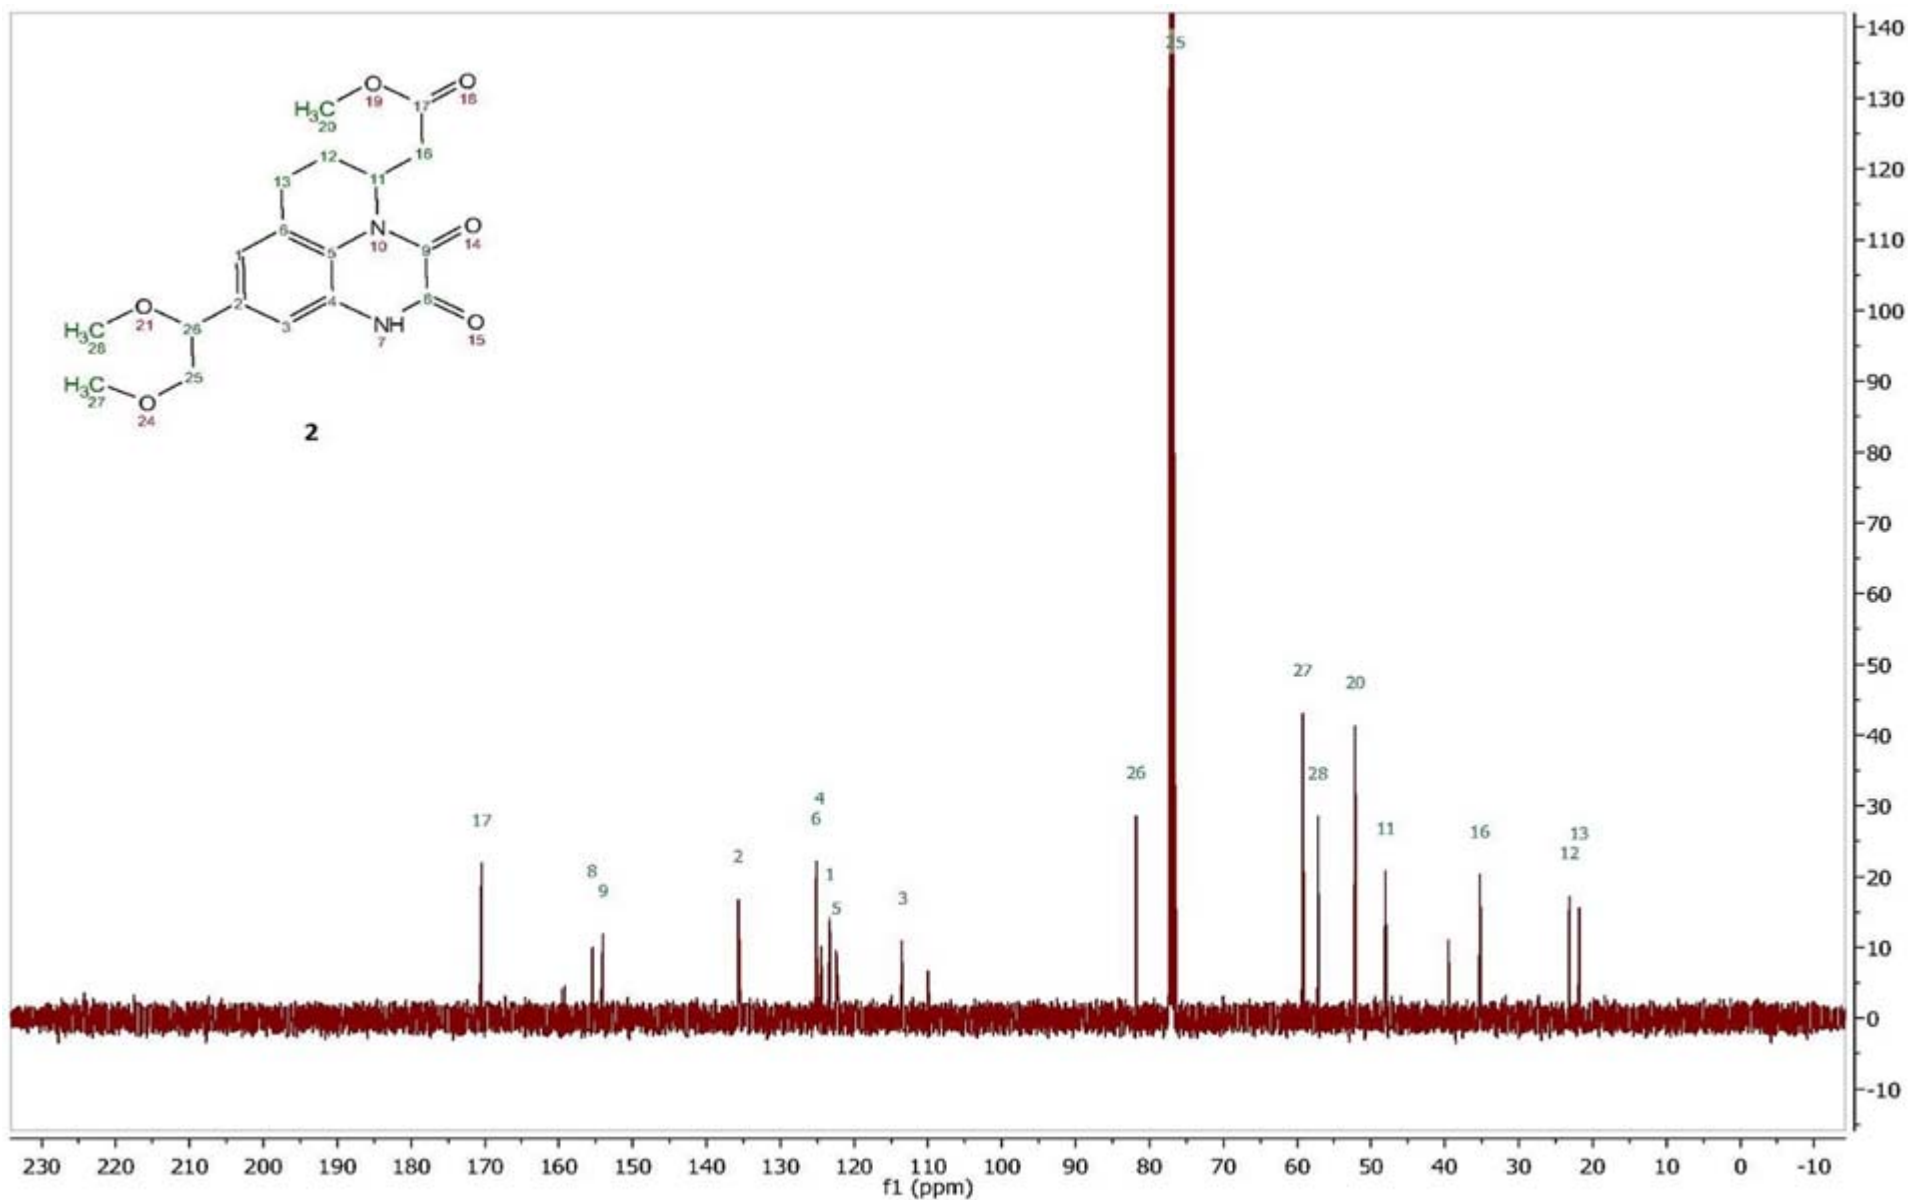

$^{13}\text{C}$  NMR of compound **2** in  $\text{CDCl}_3$

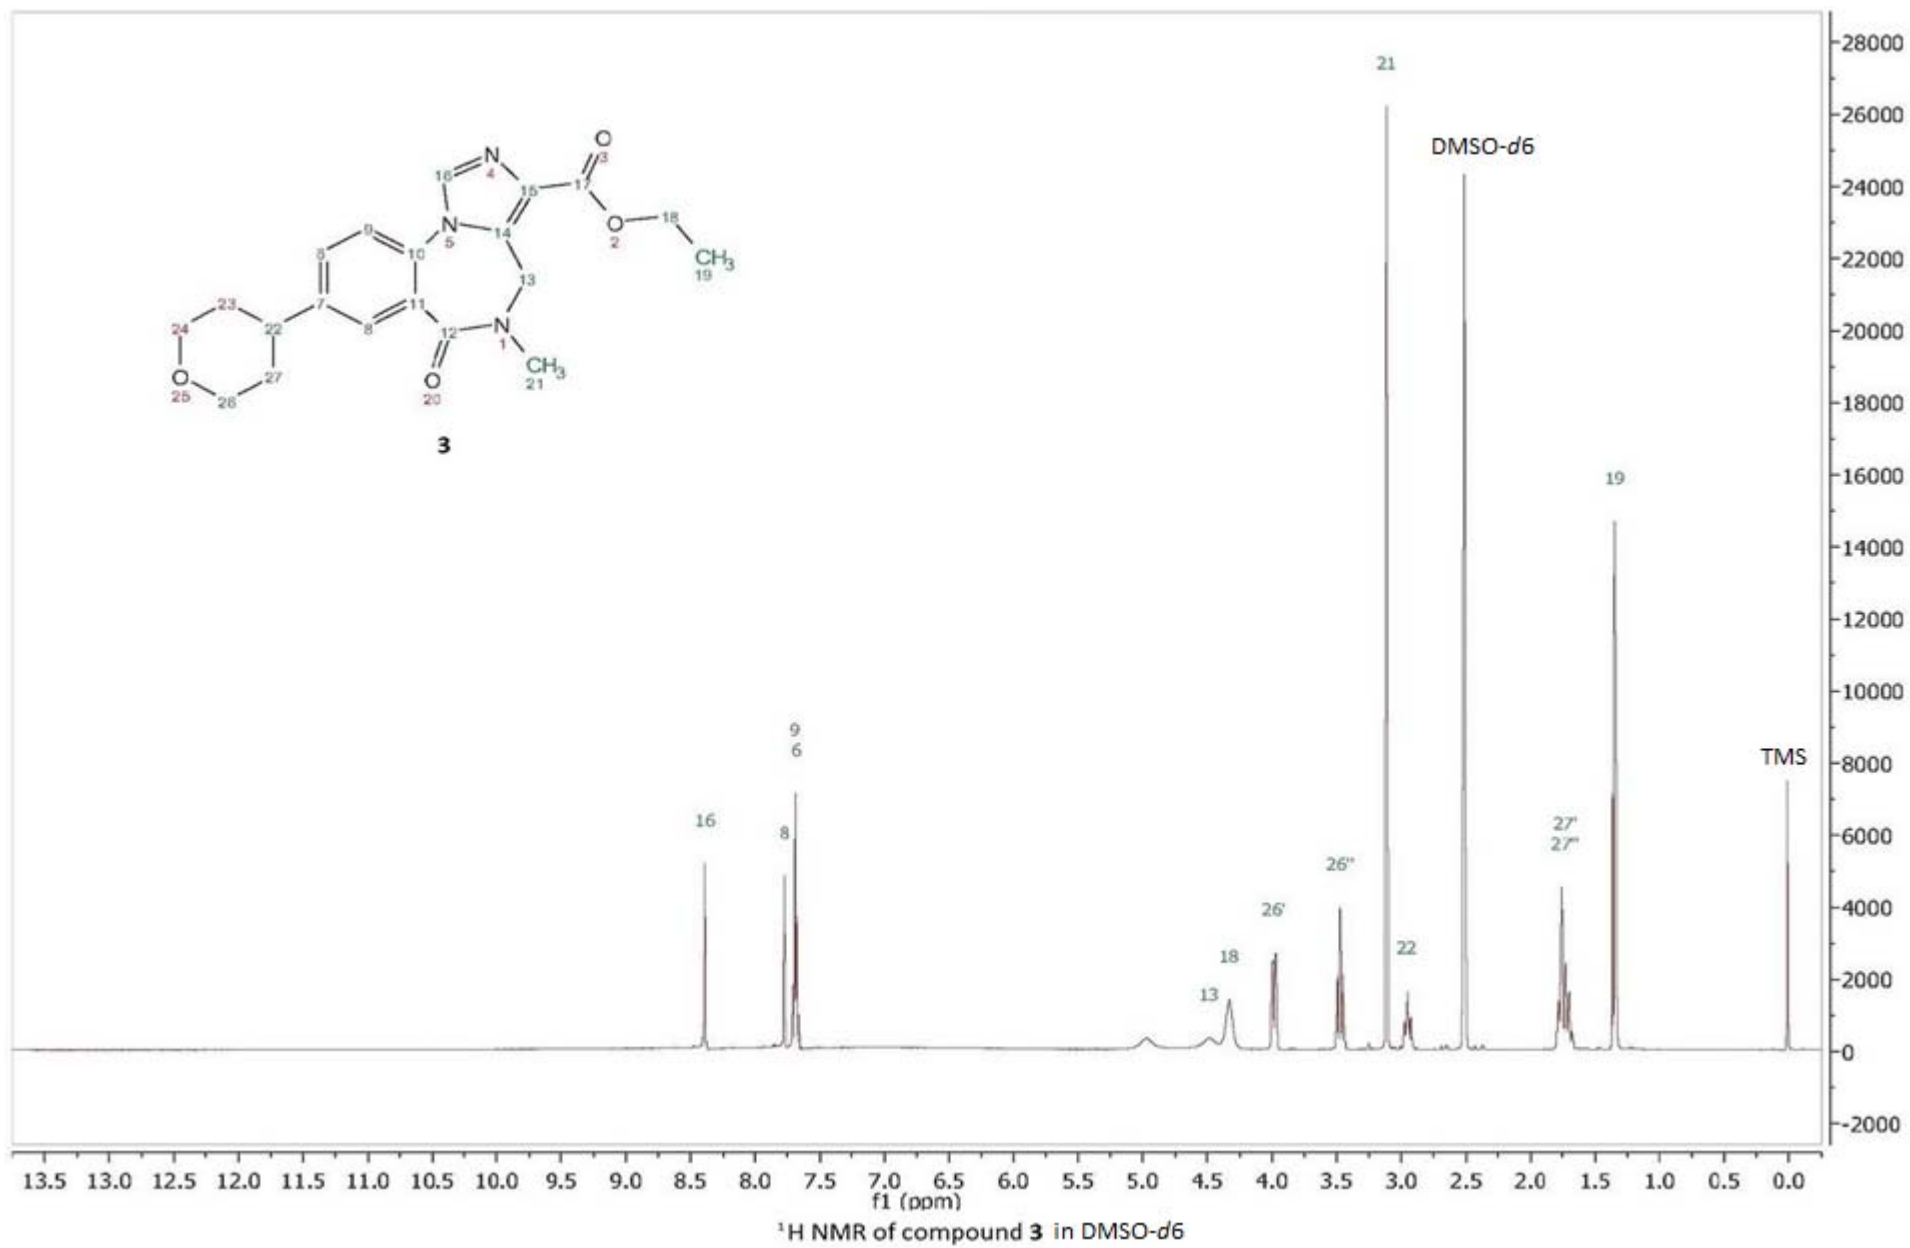

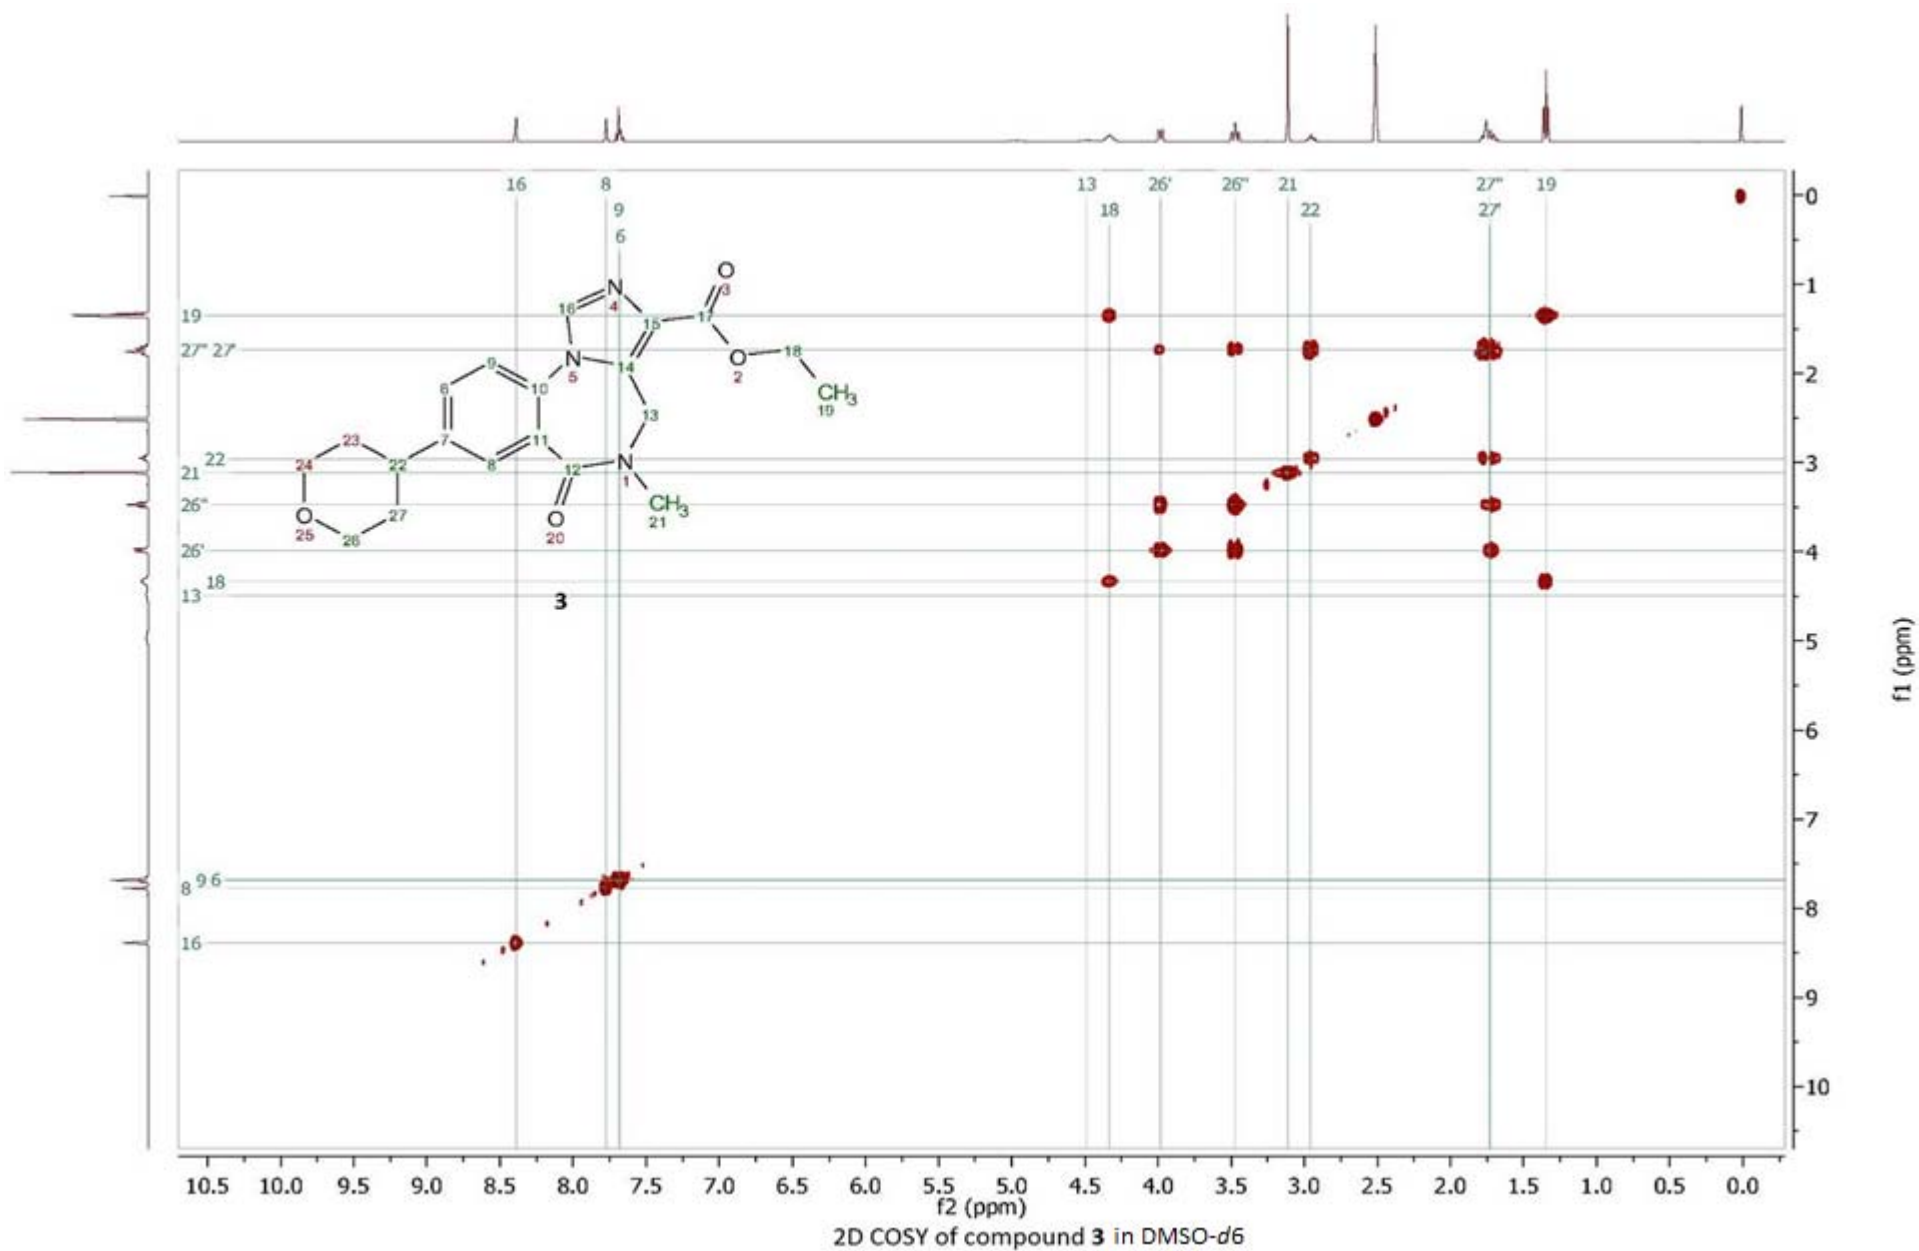

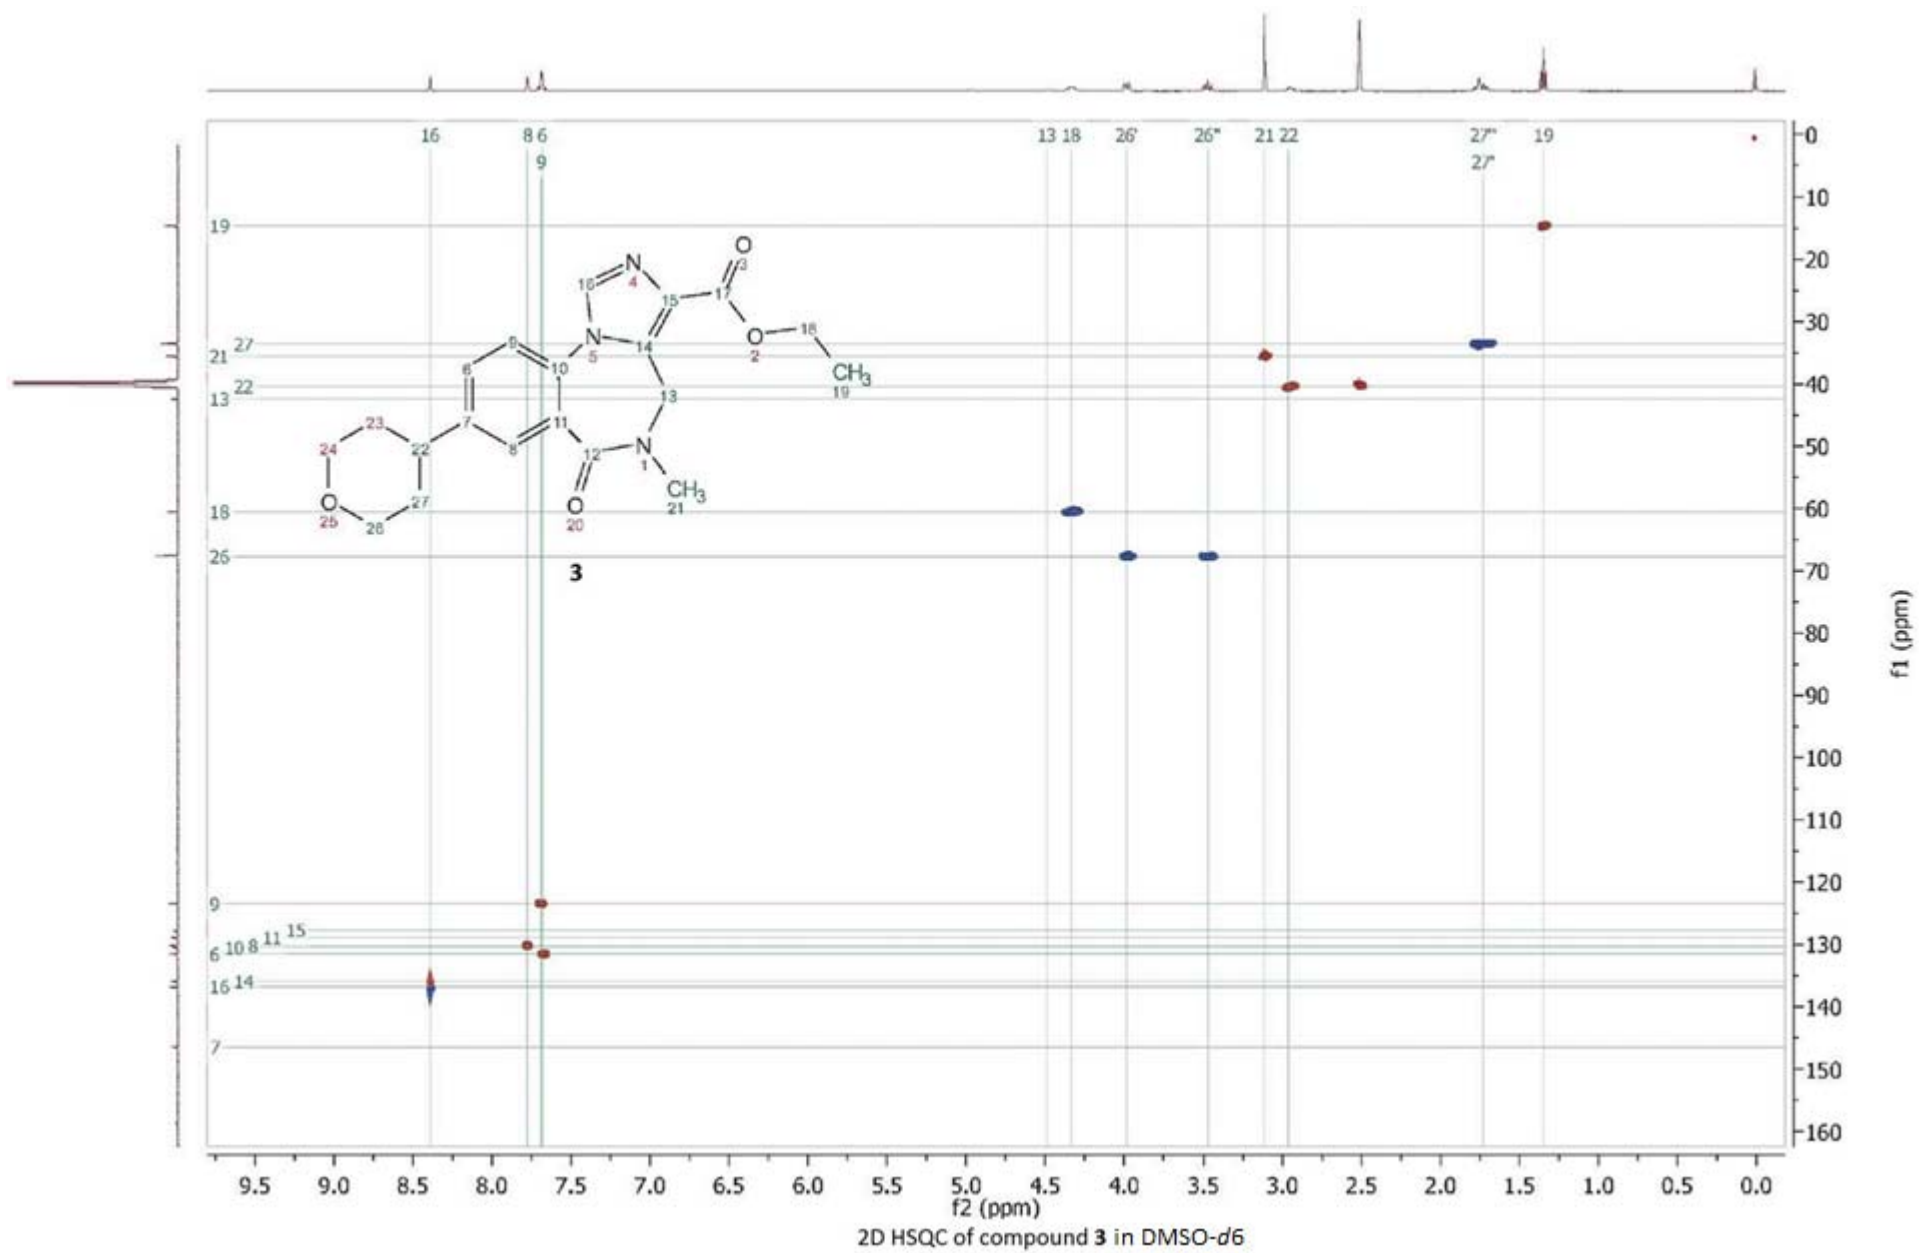

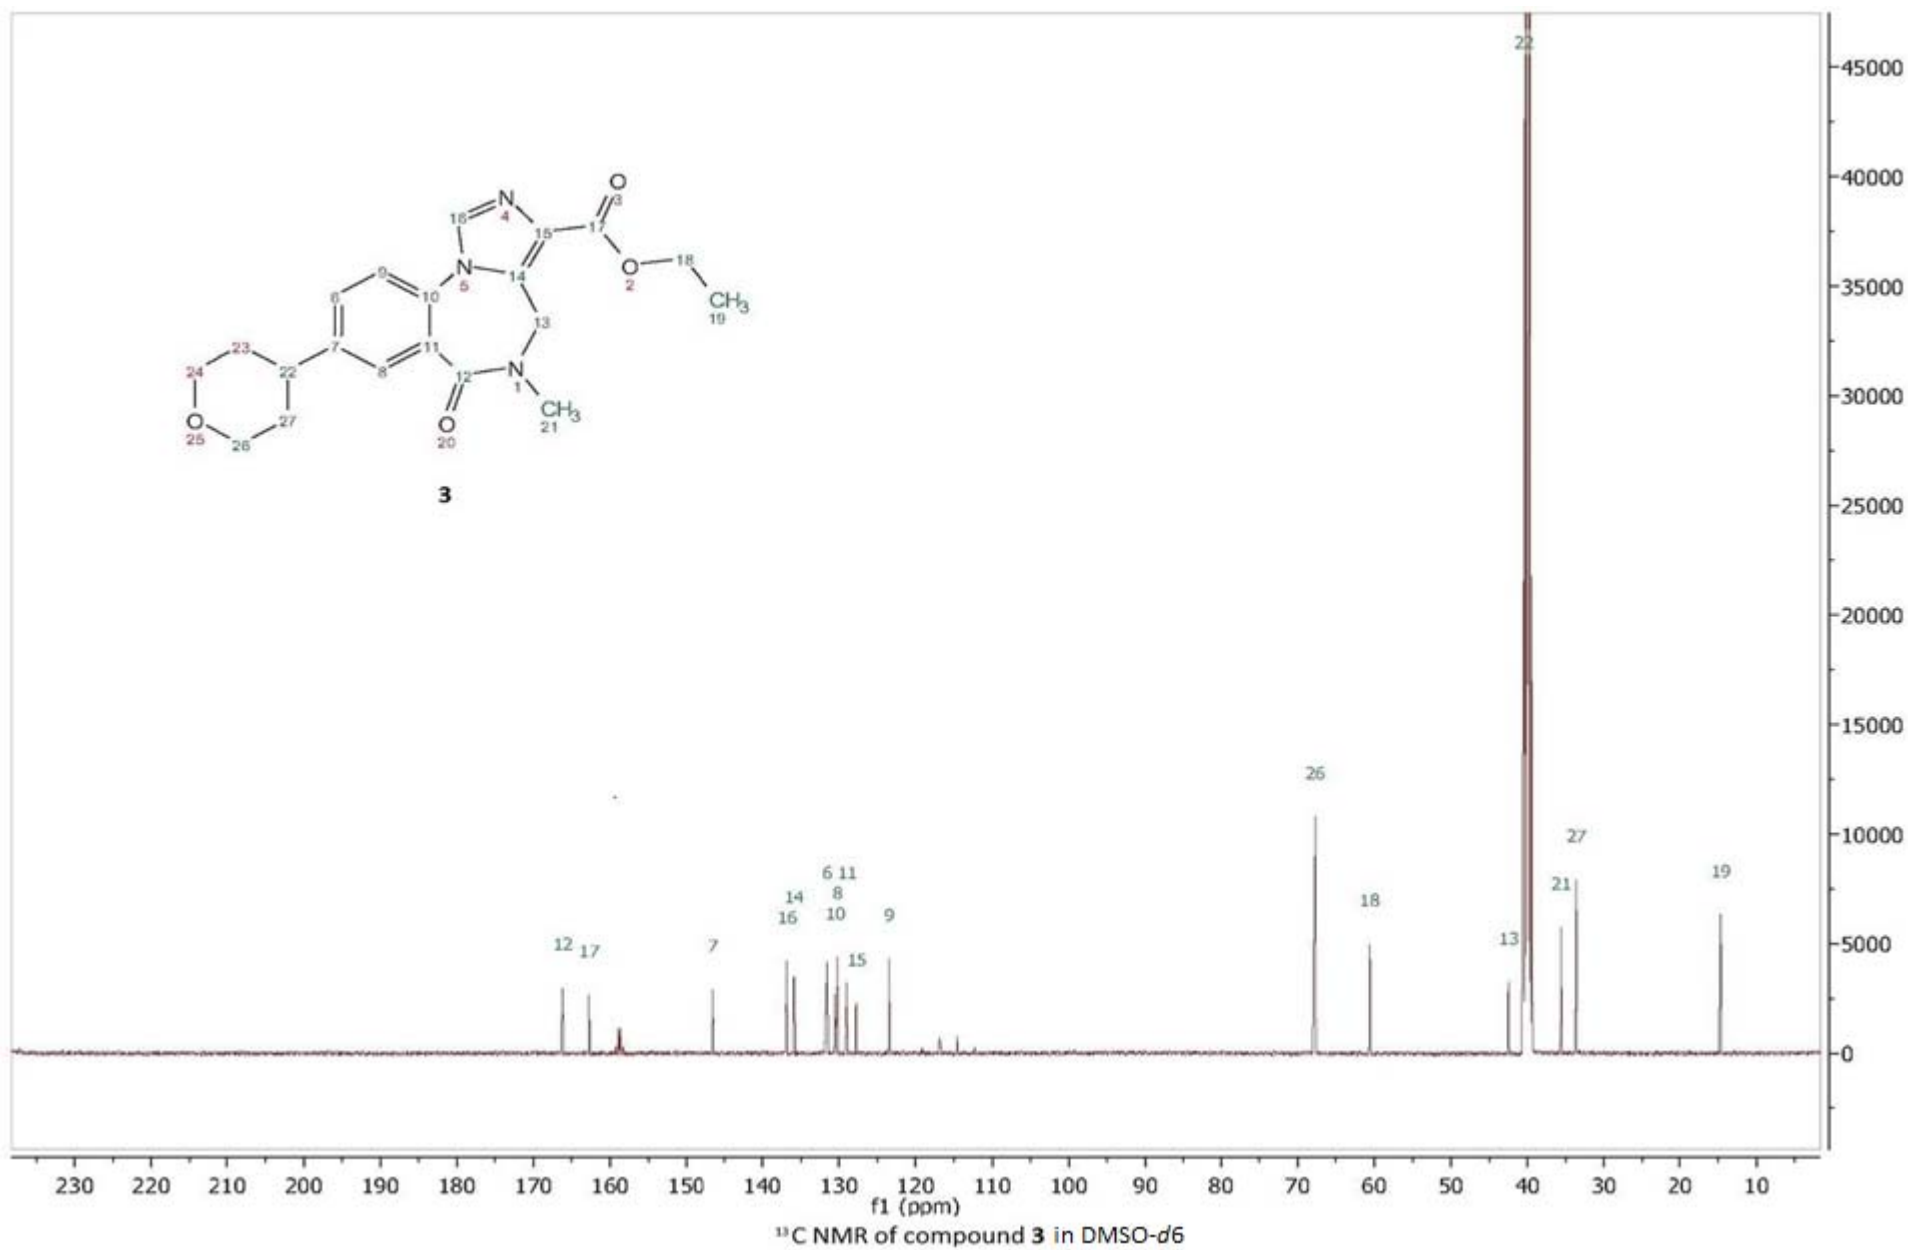

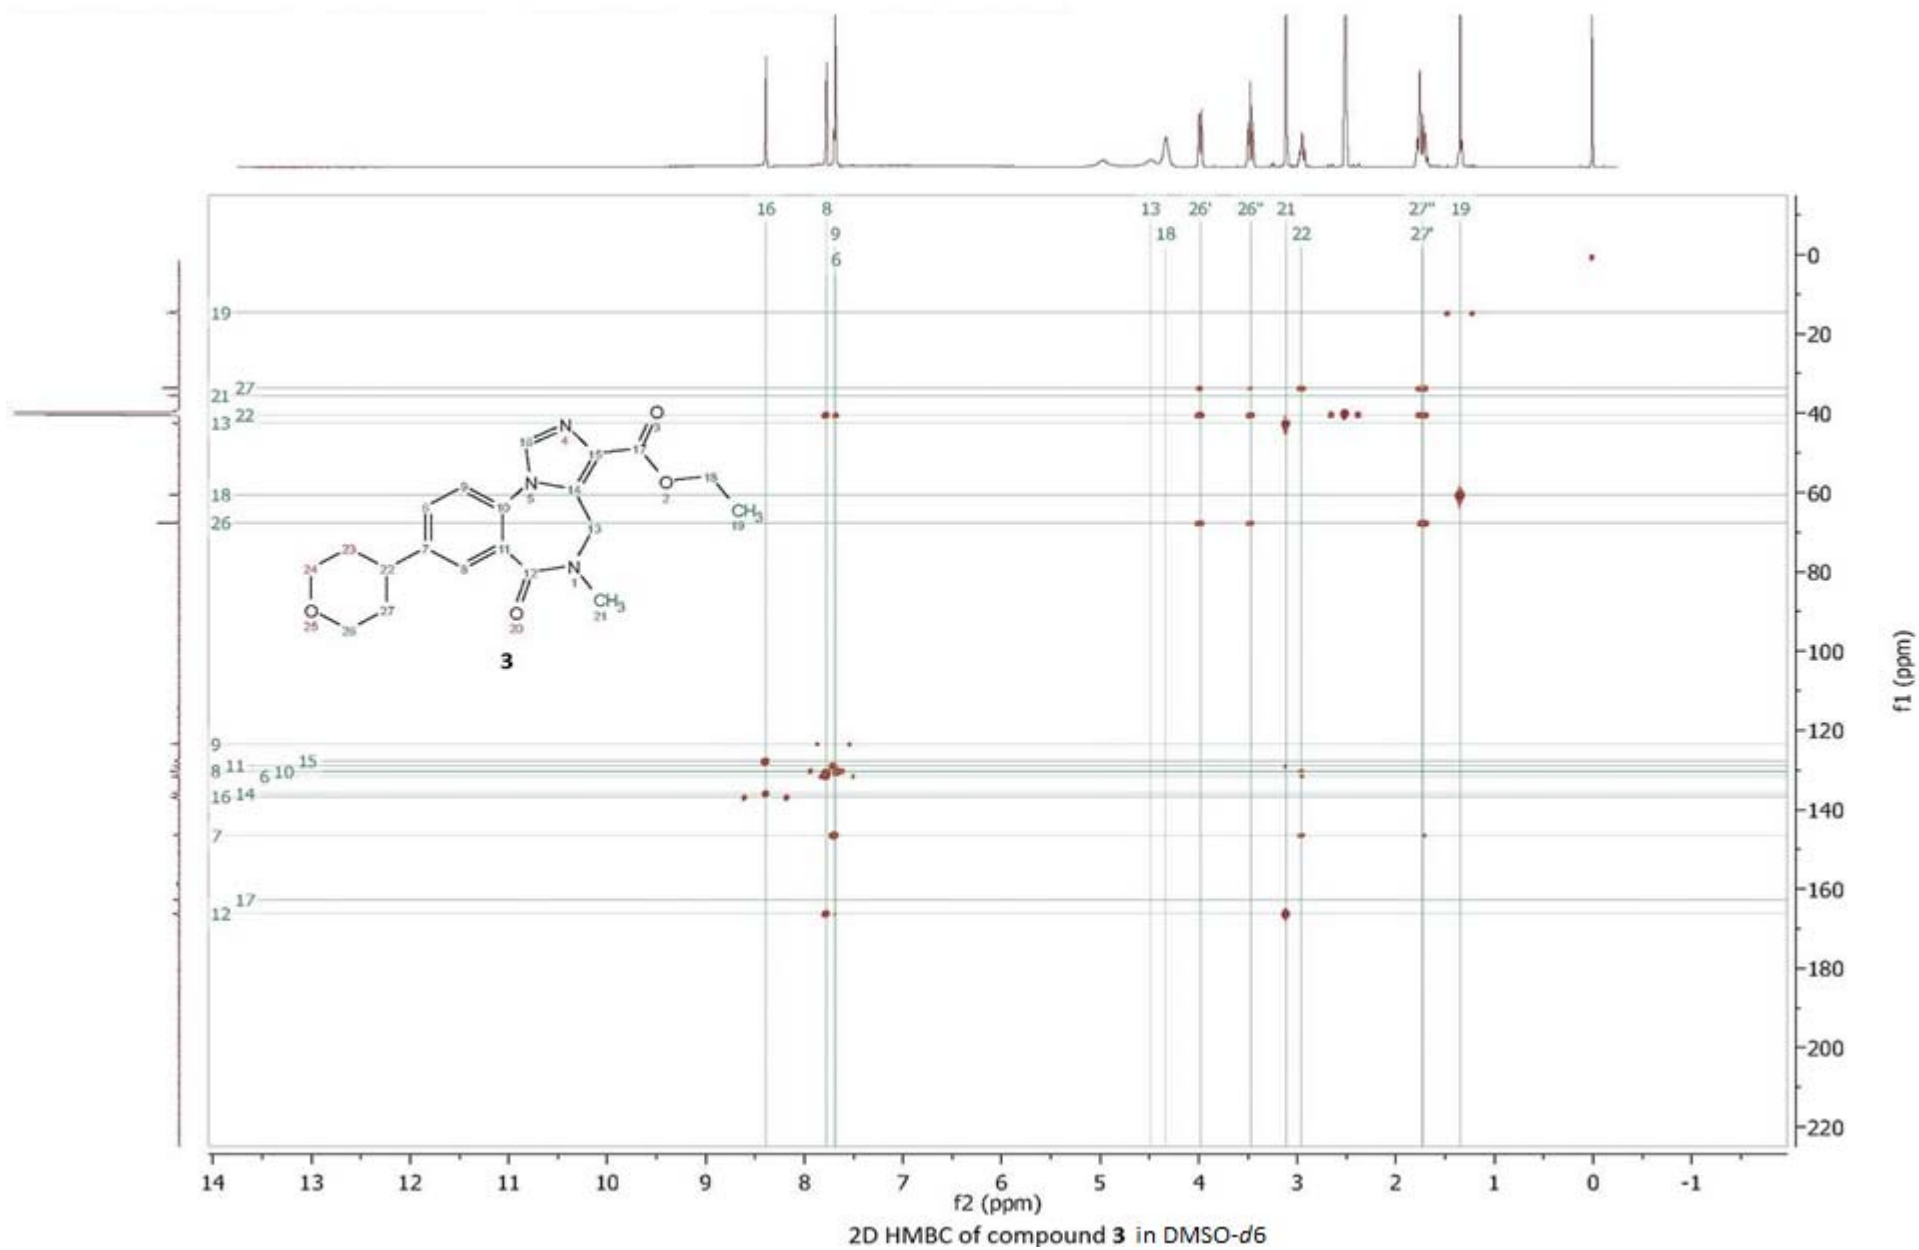

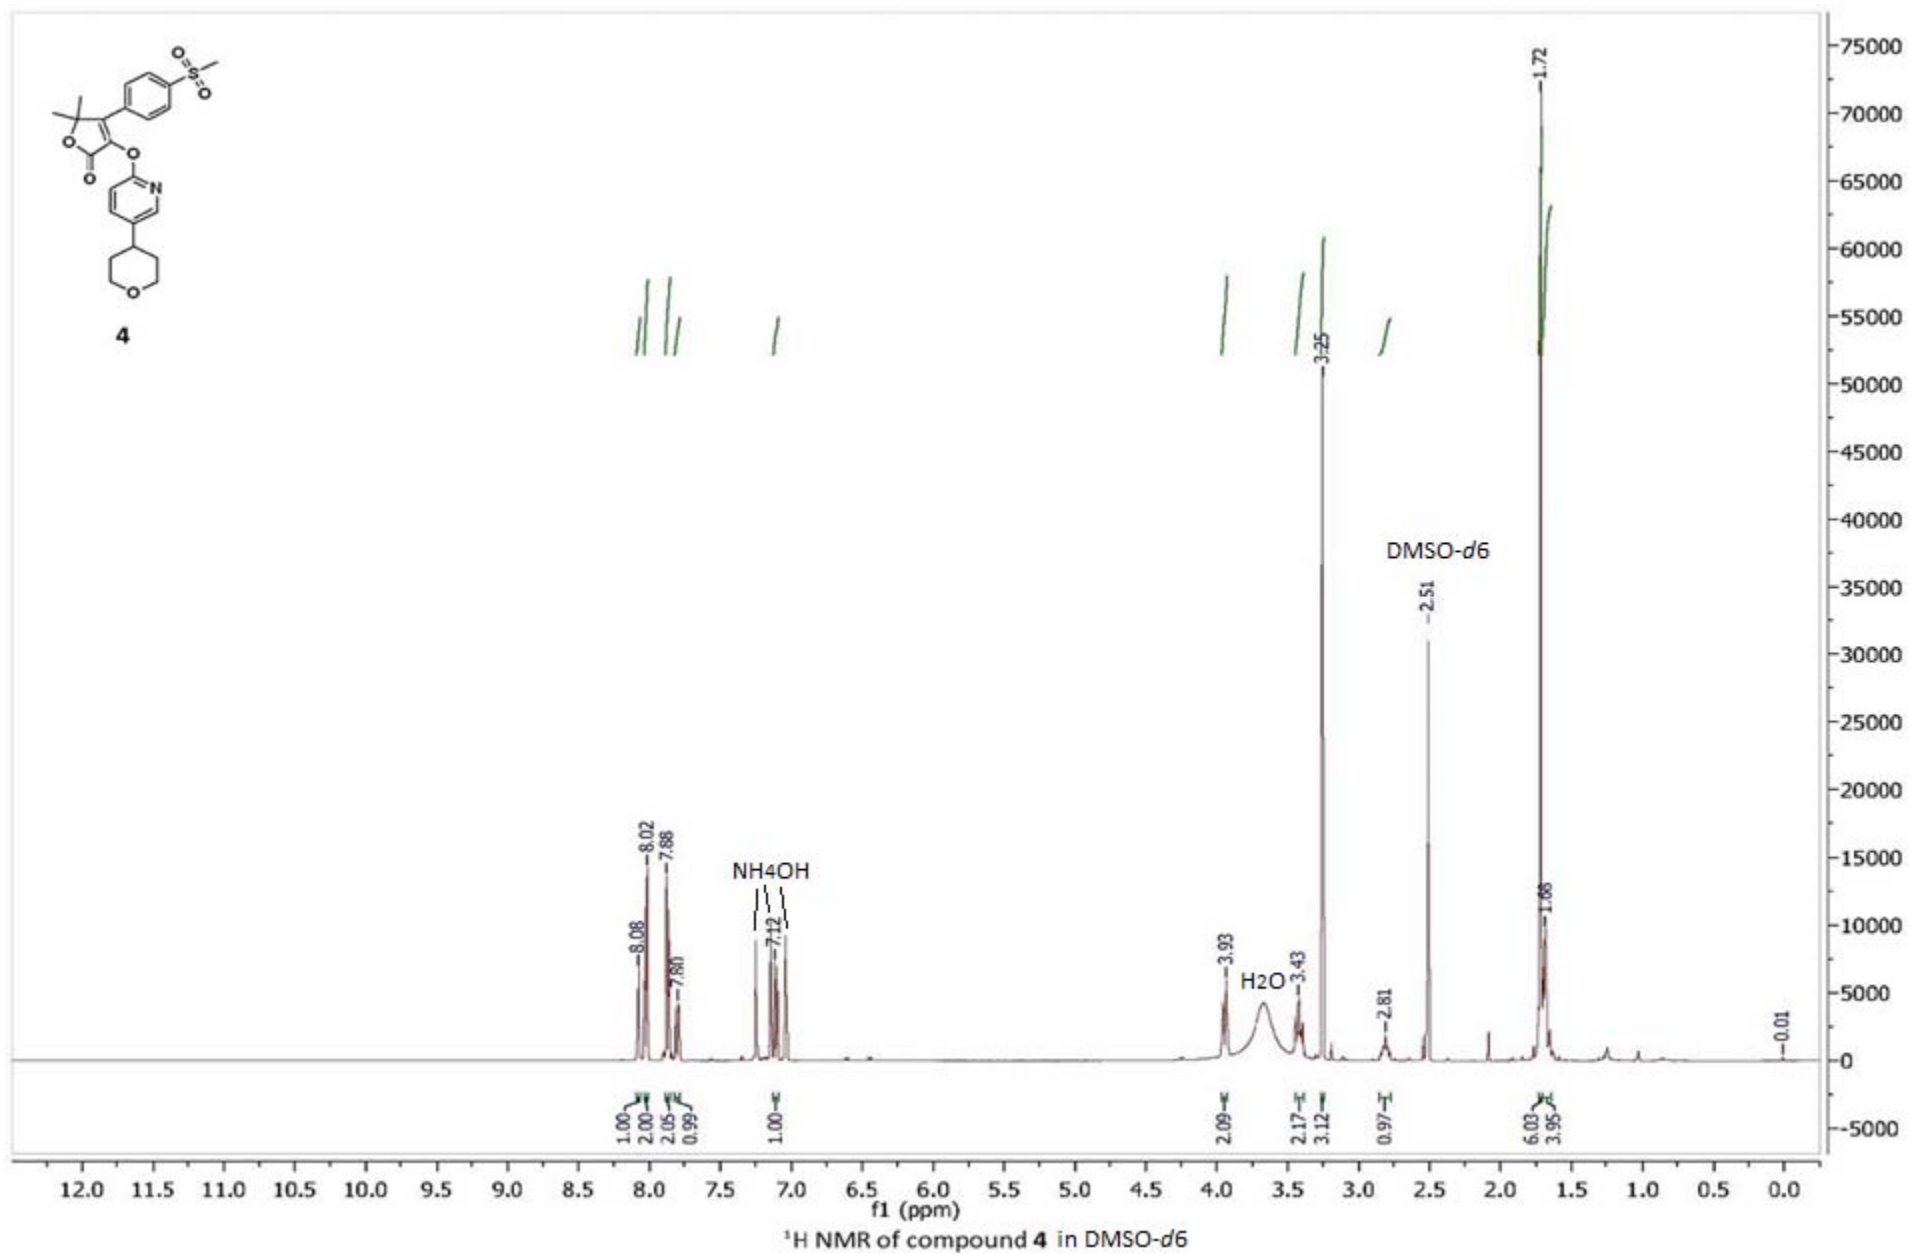

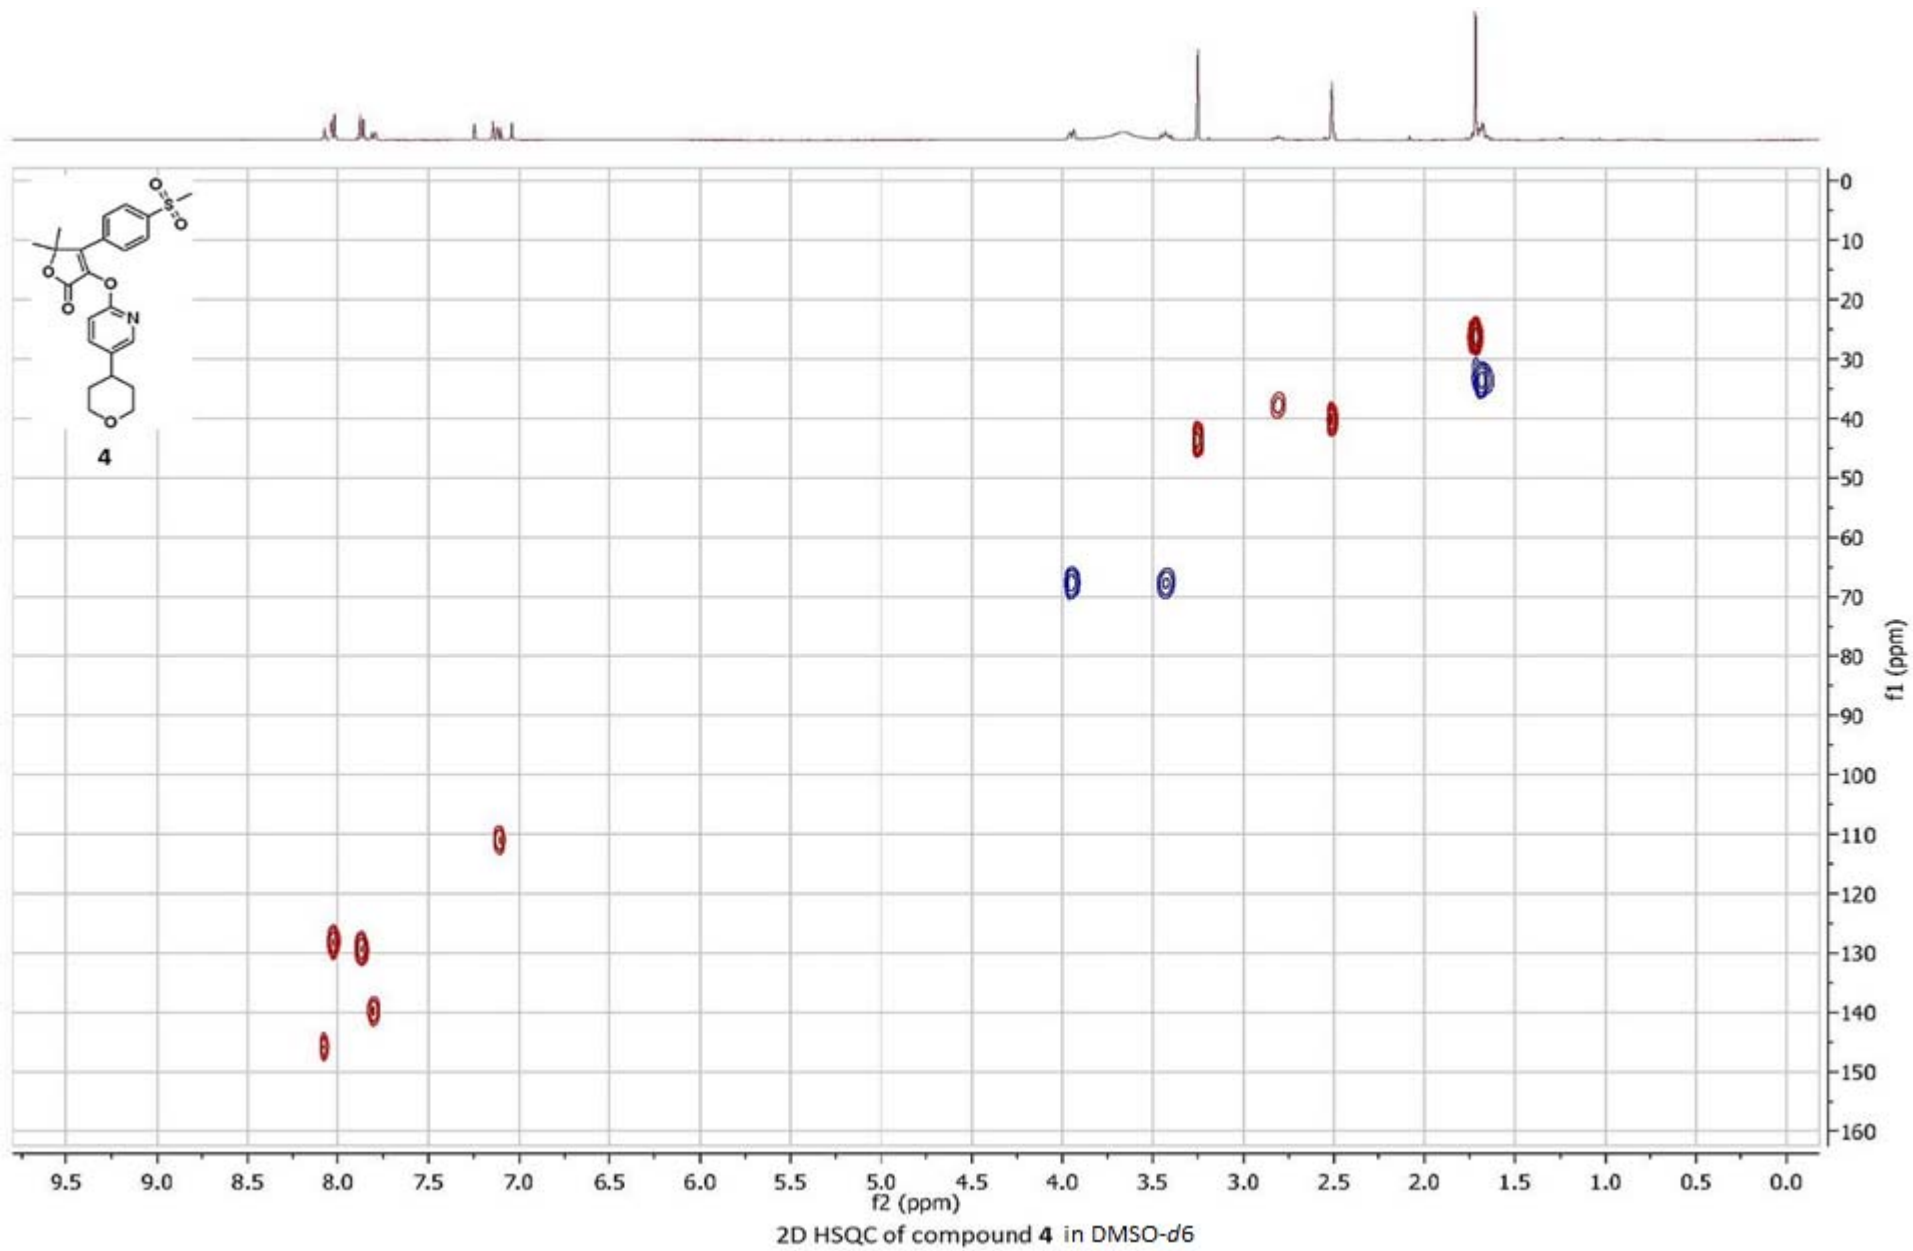



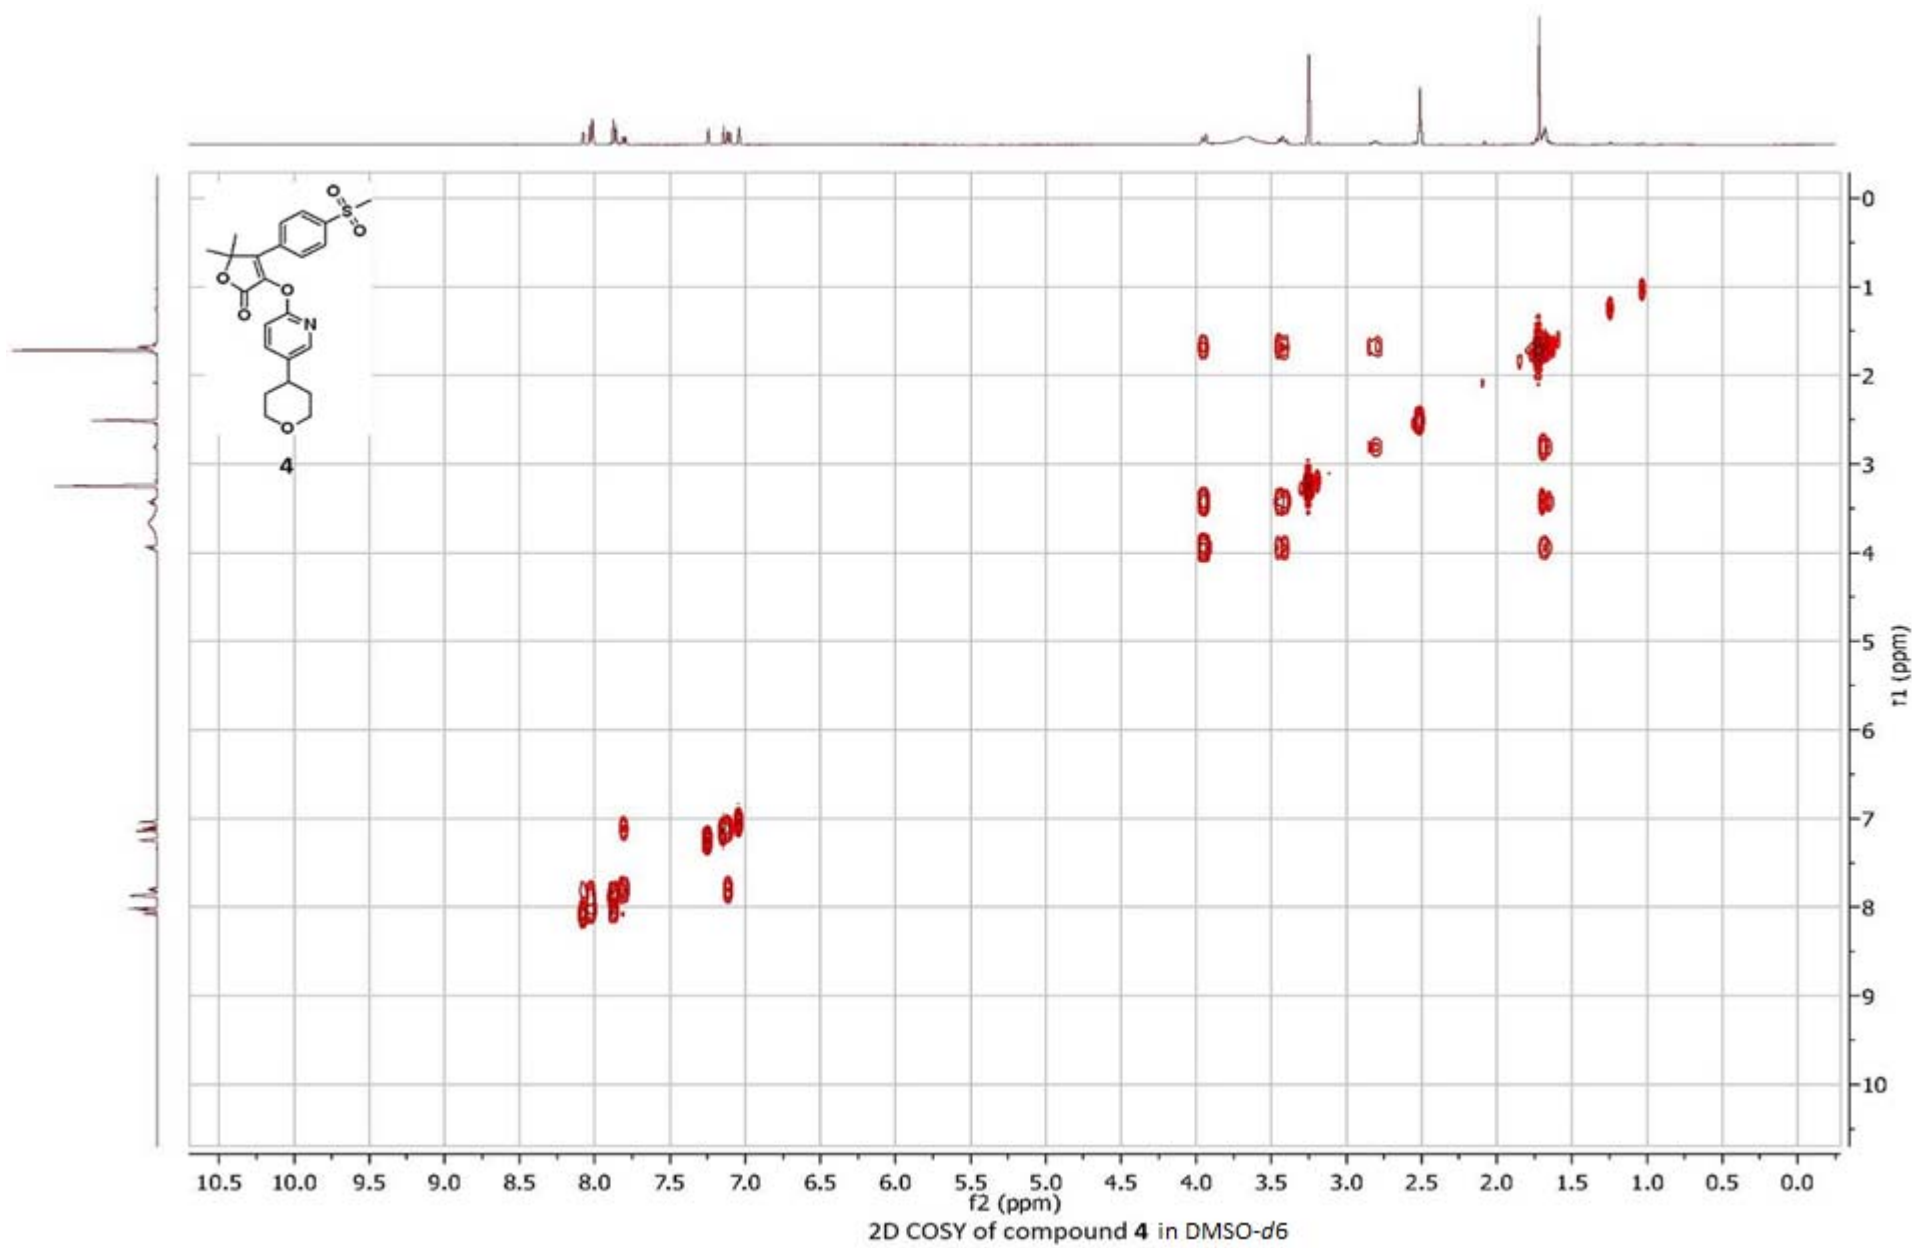

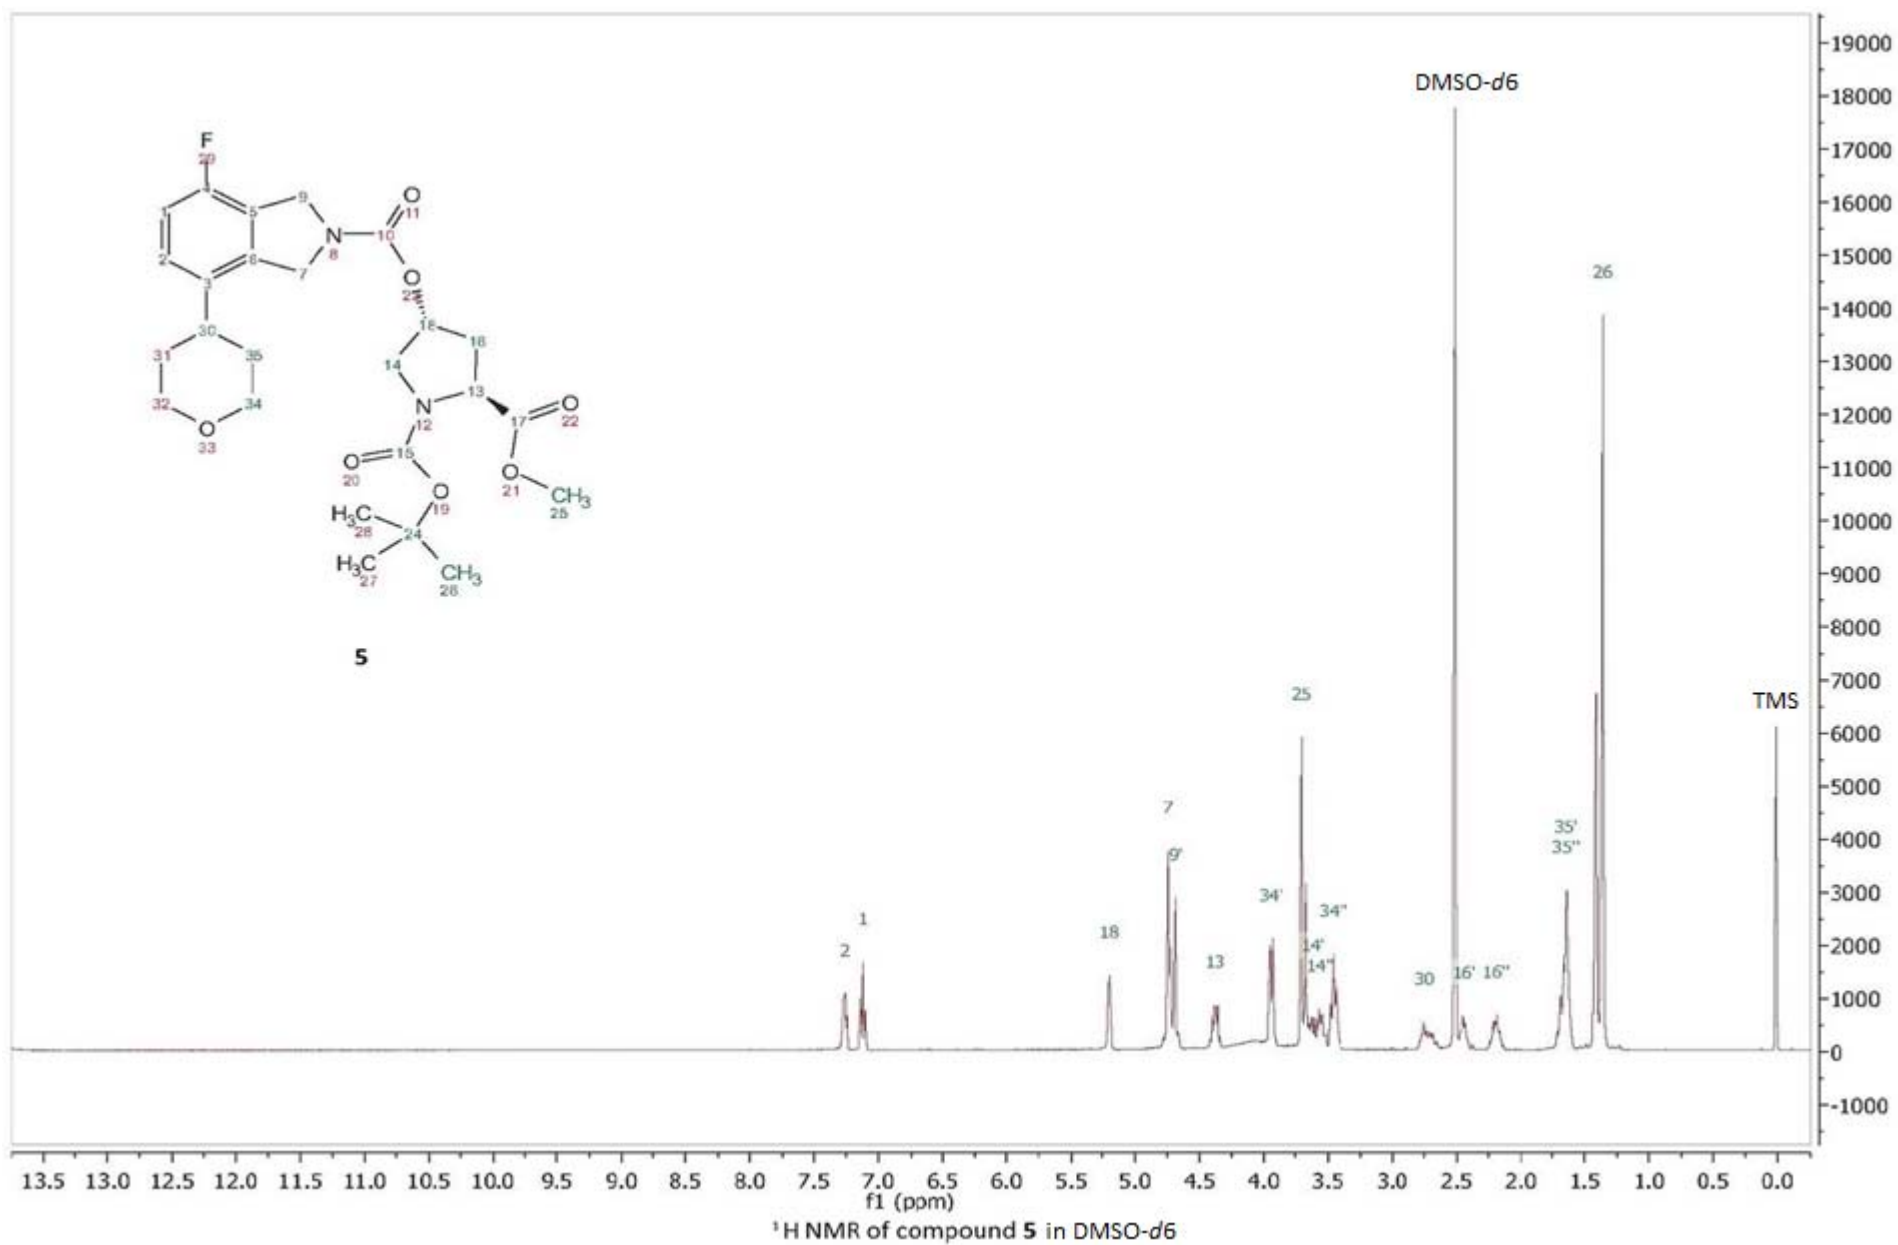

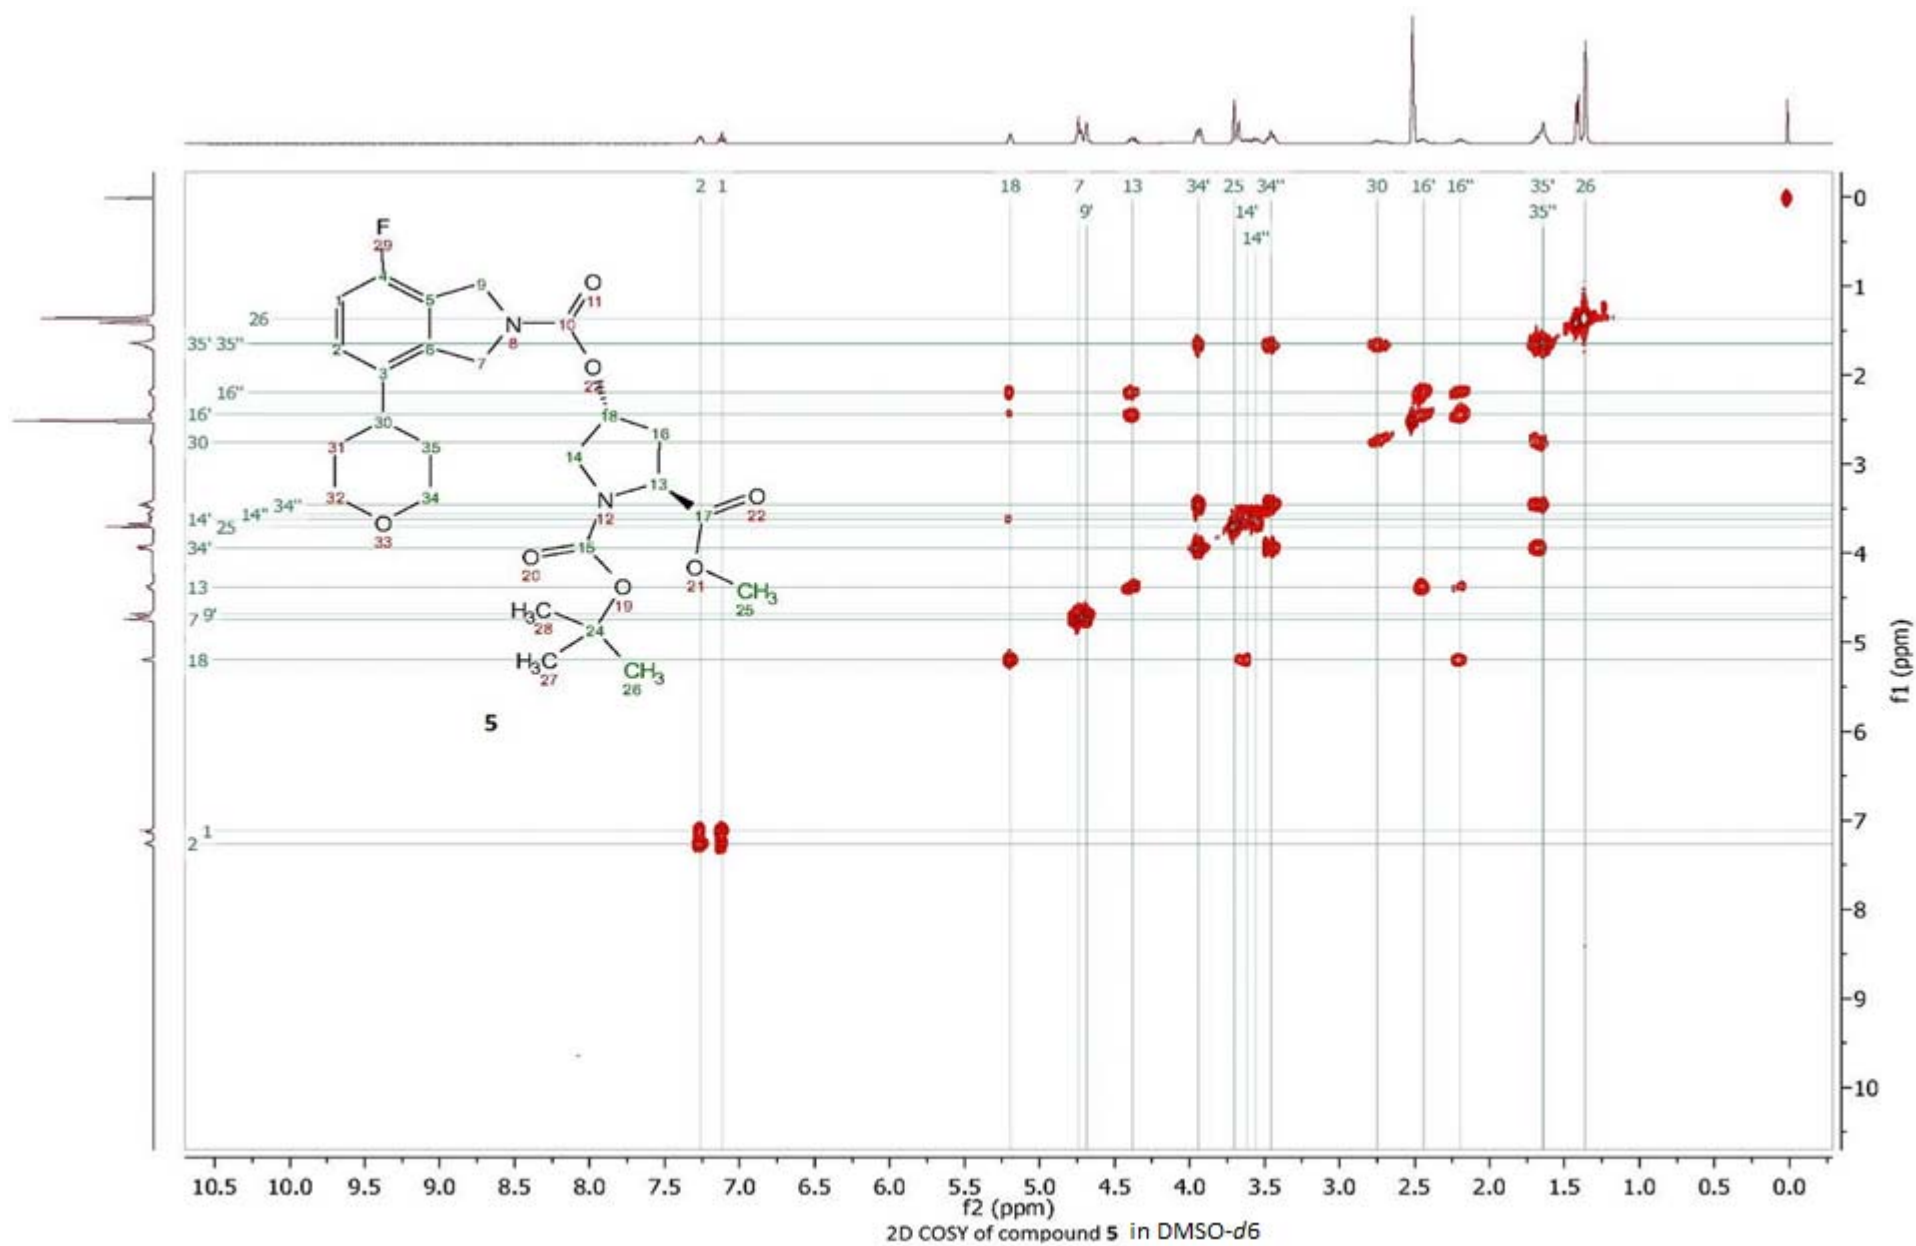



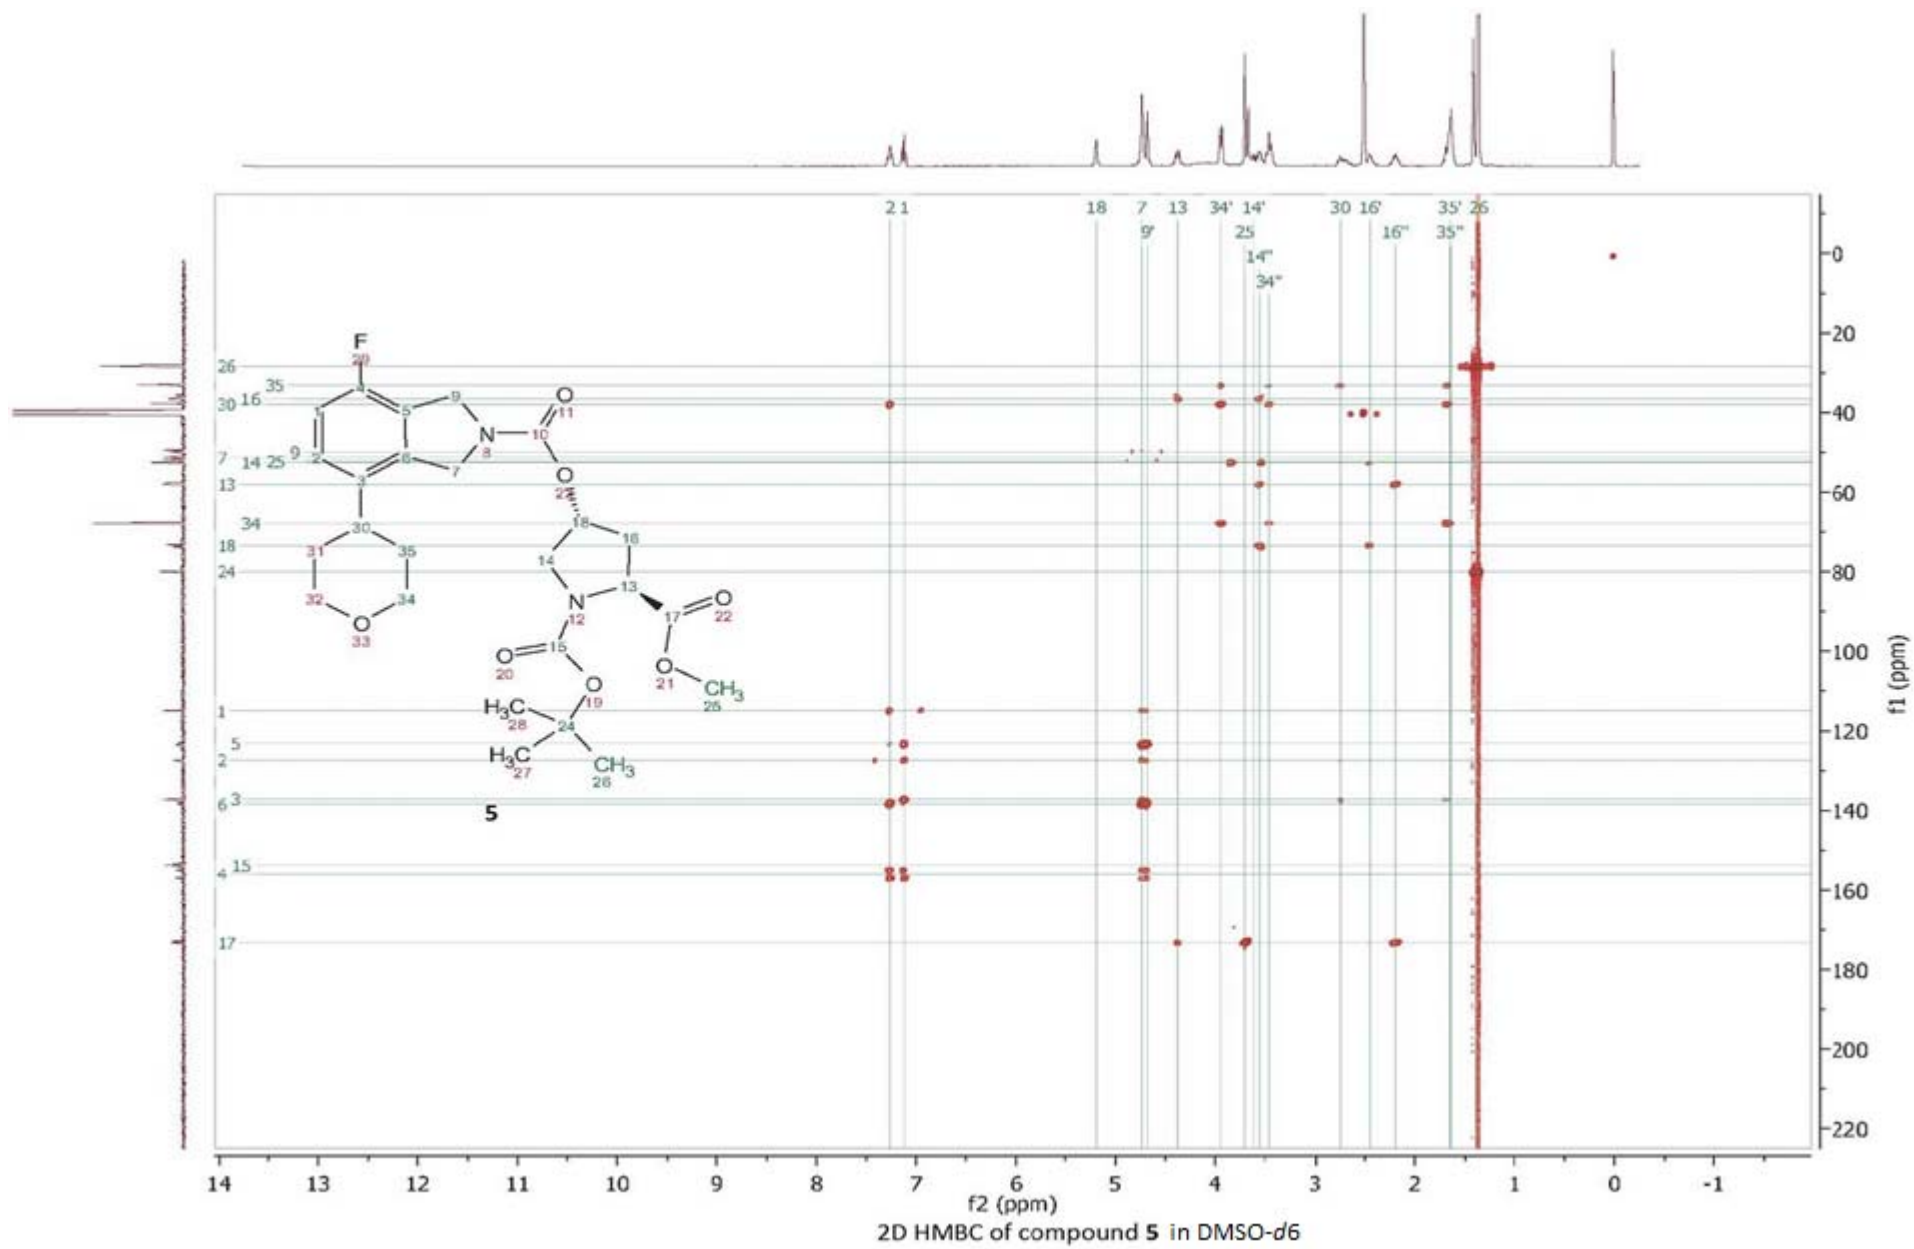

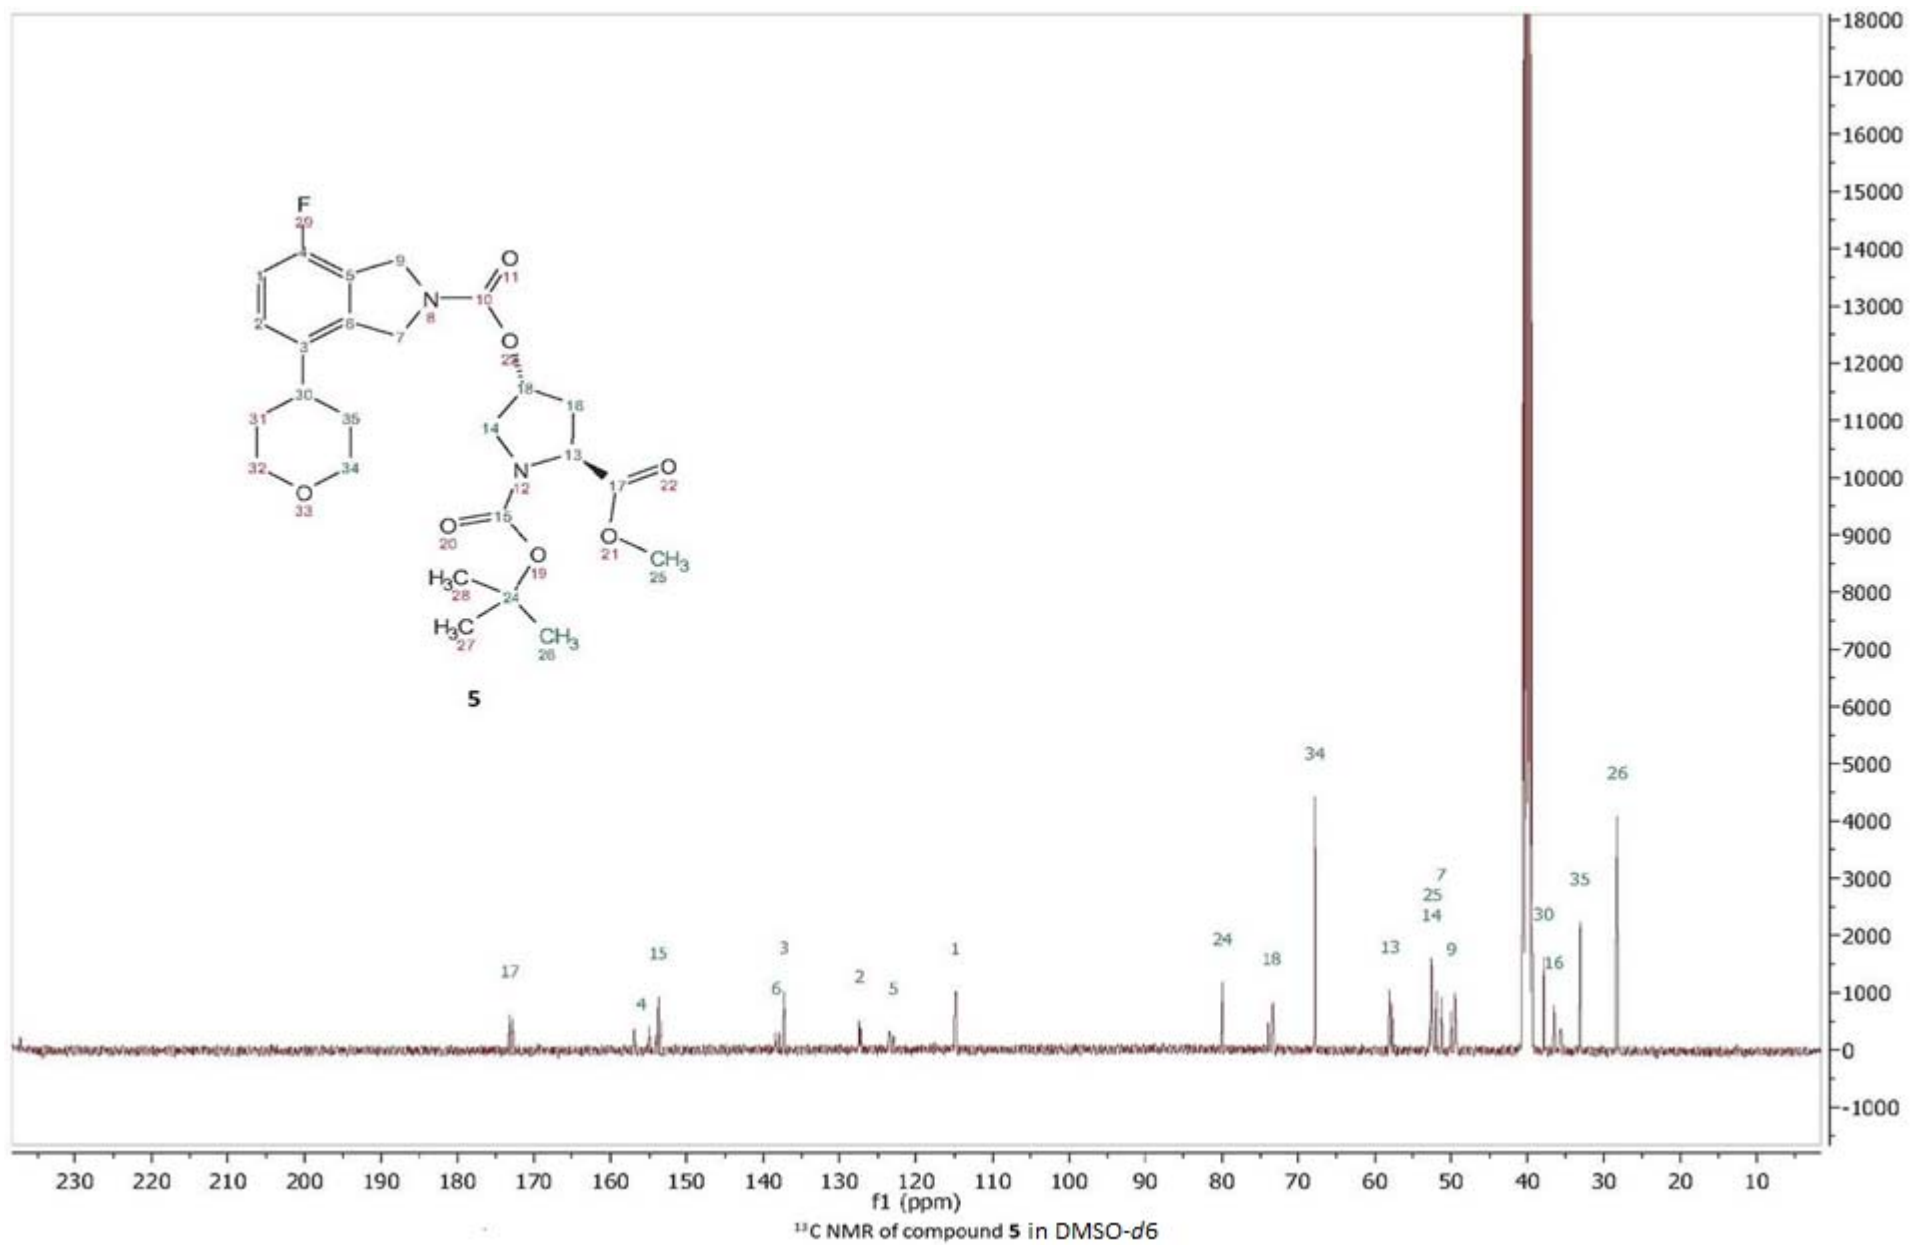

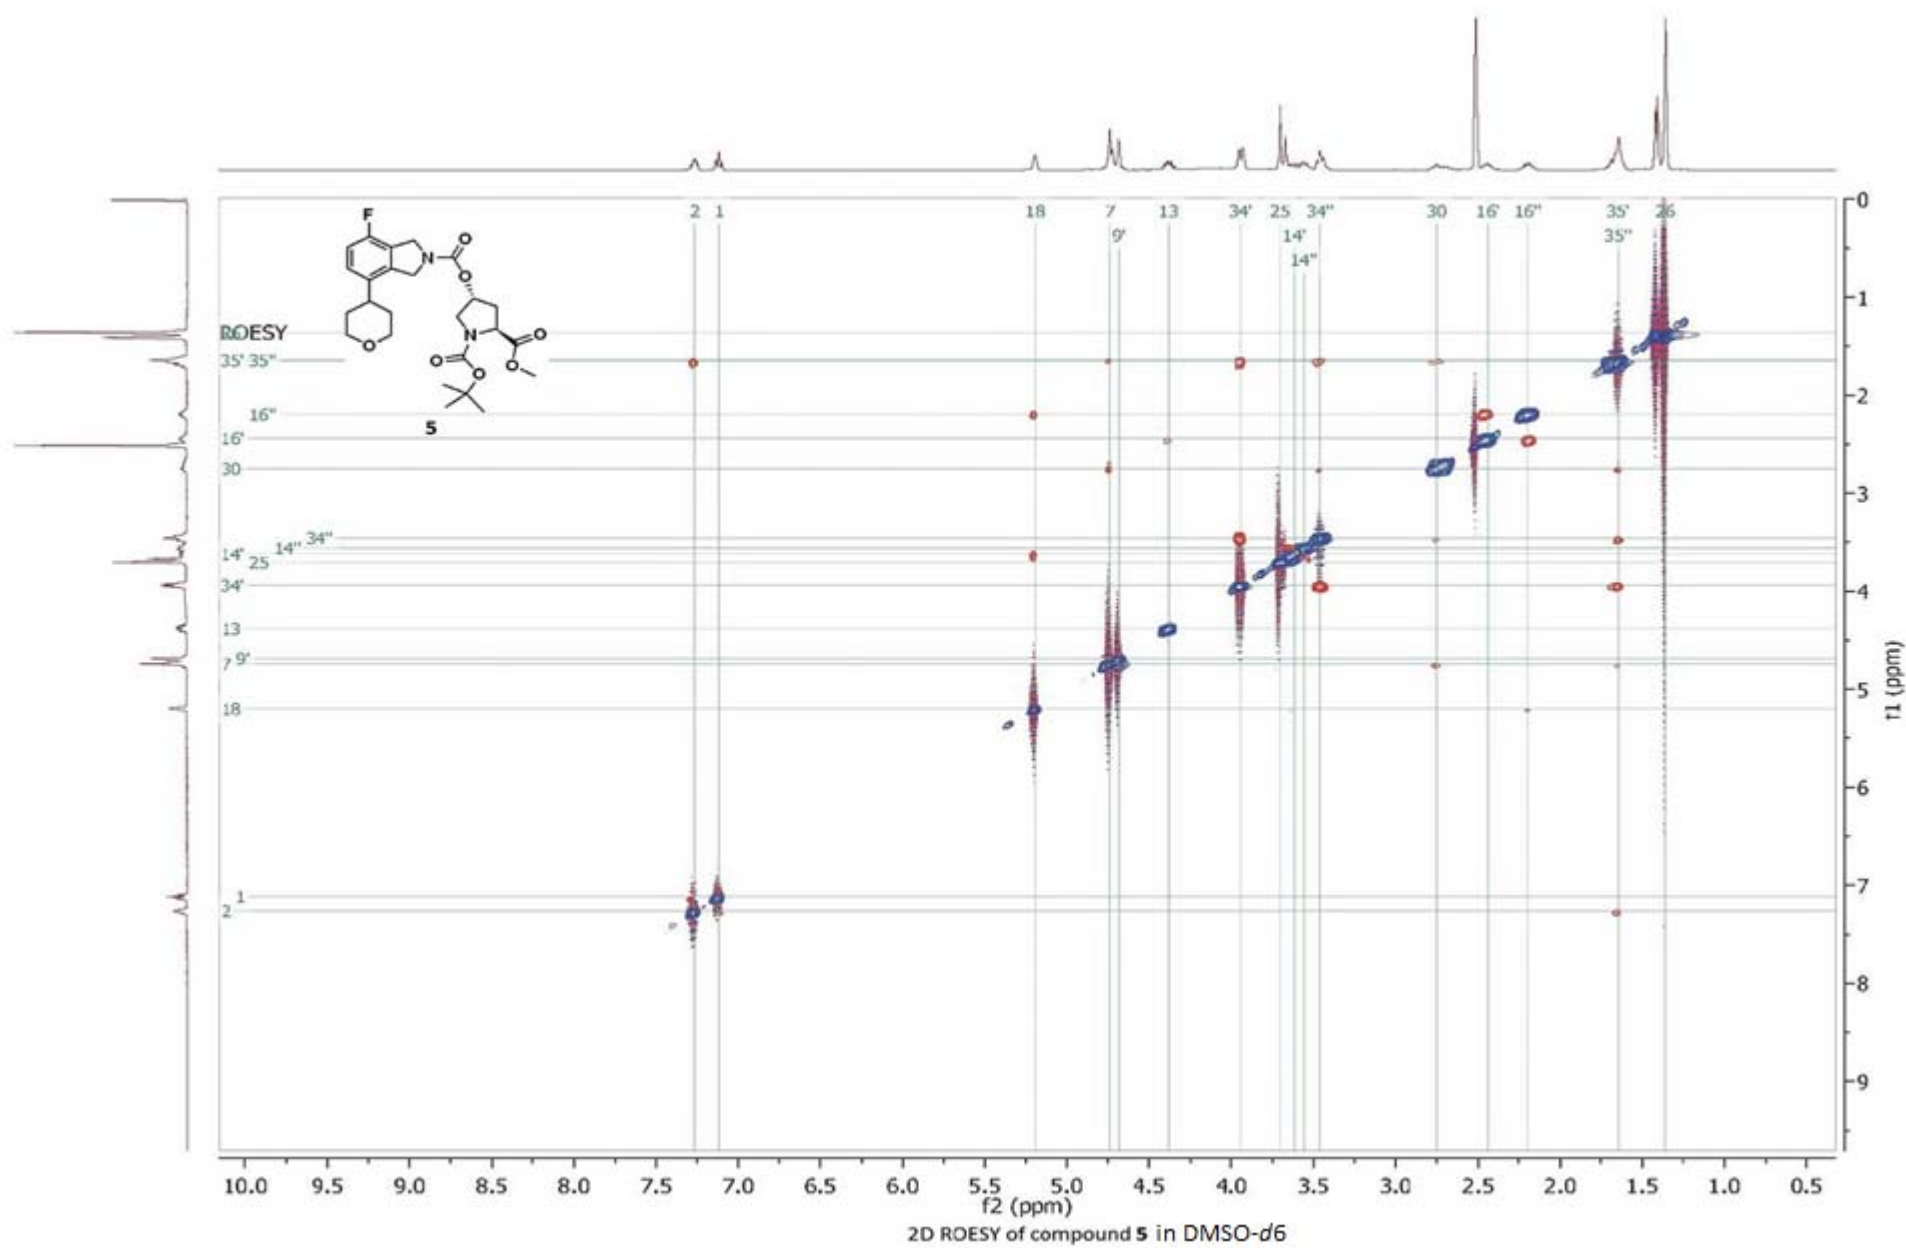

S55

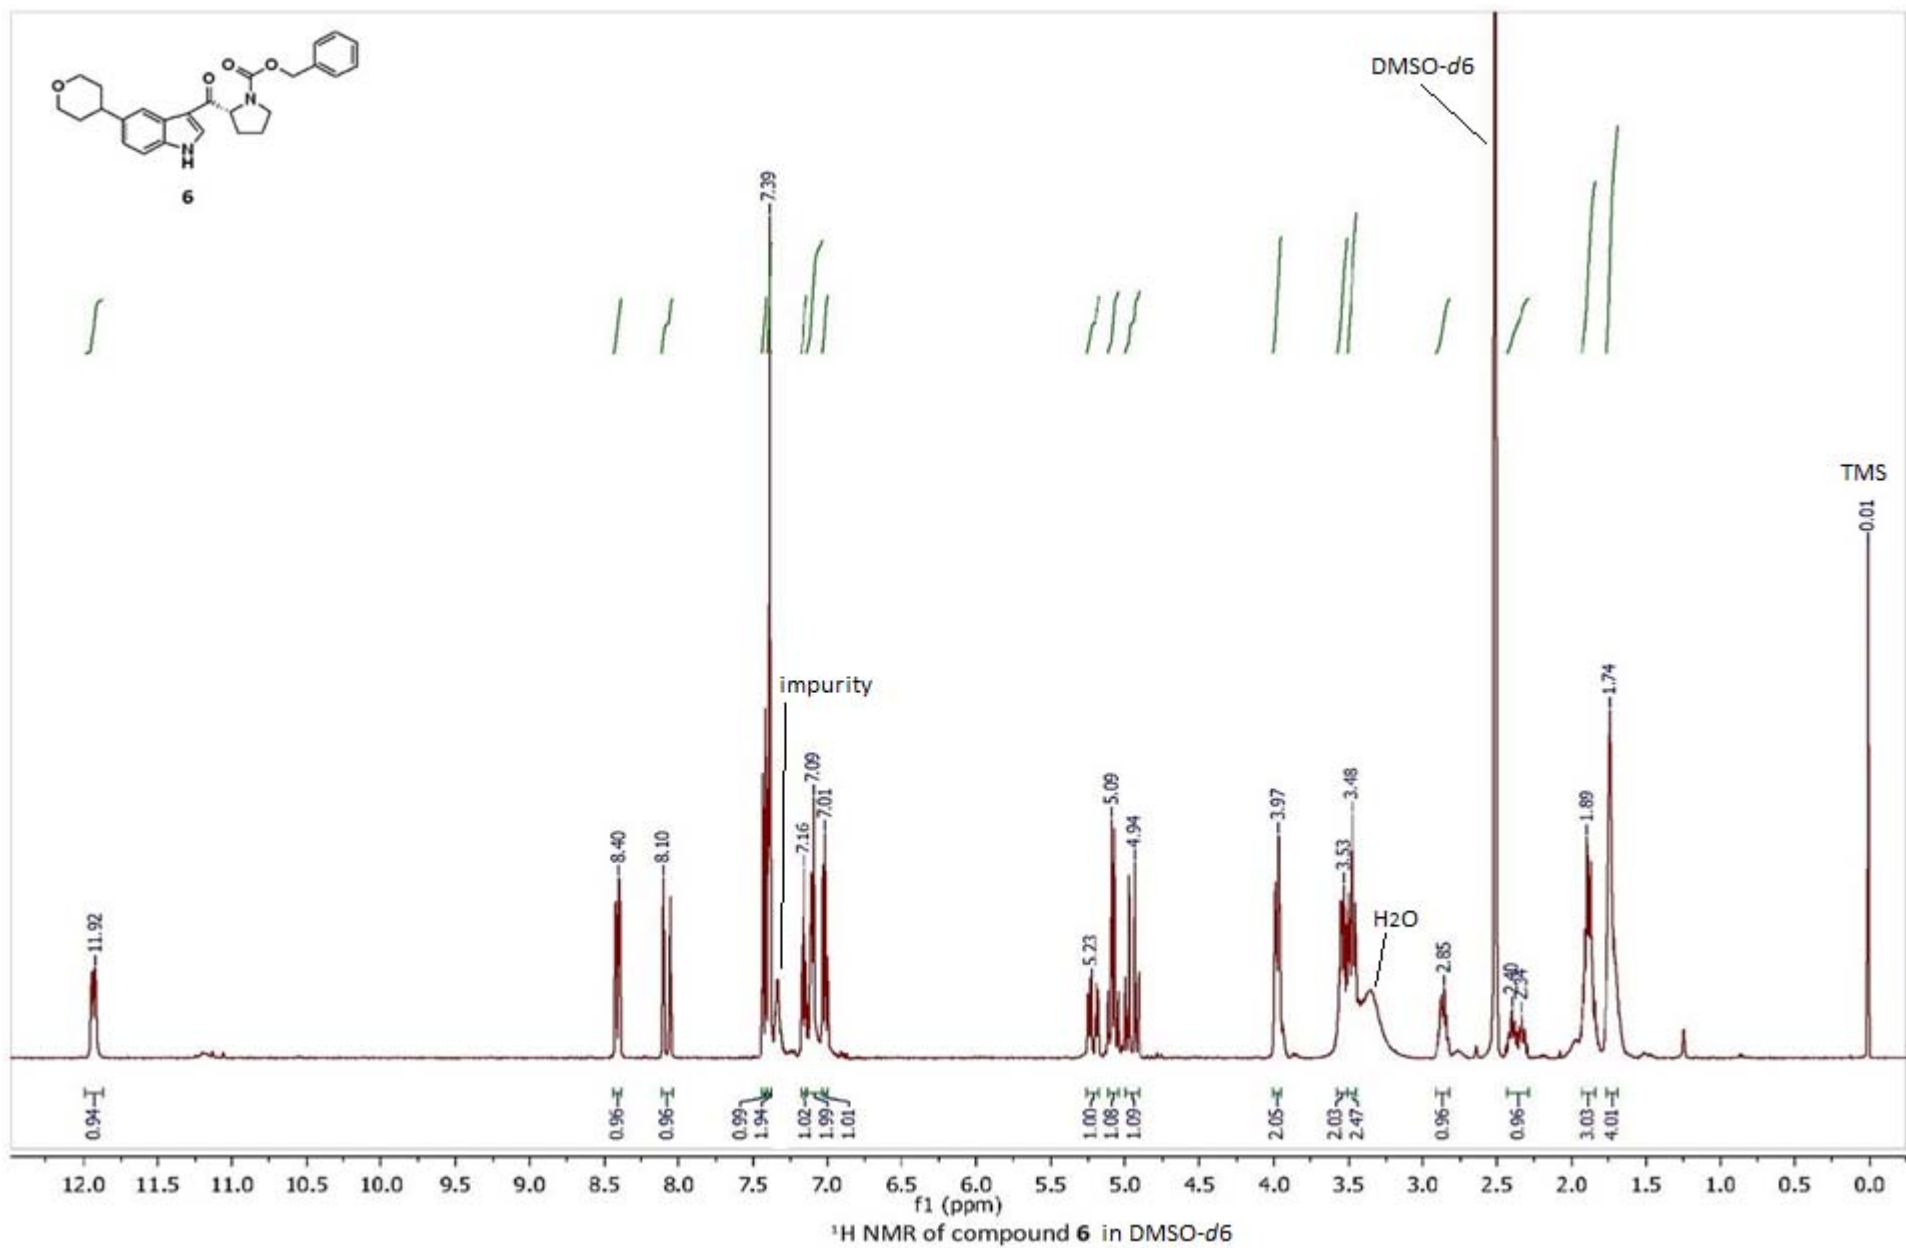



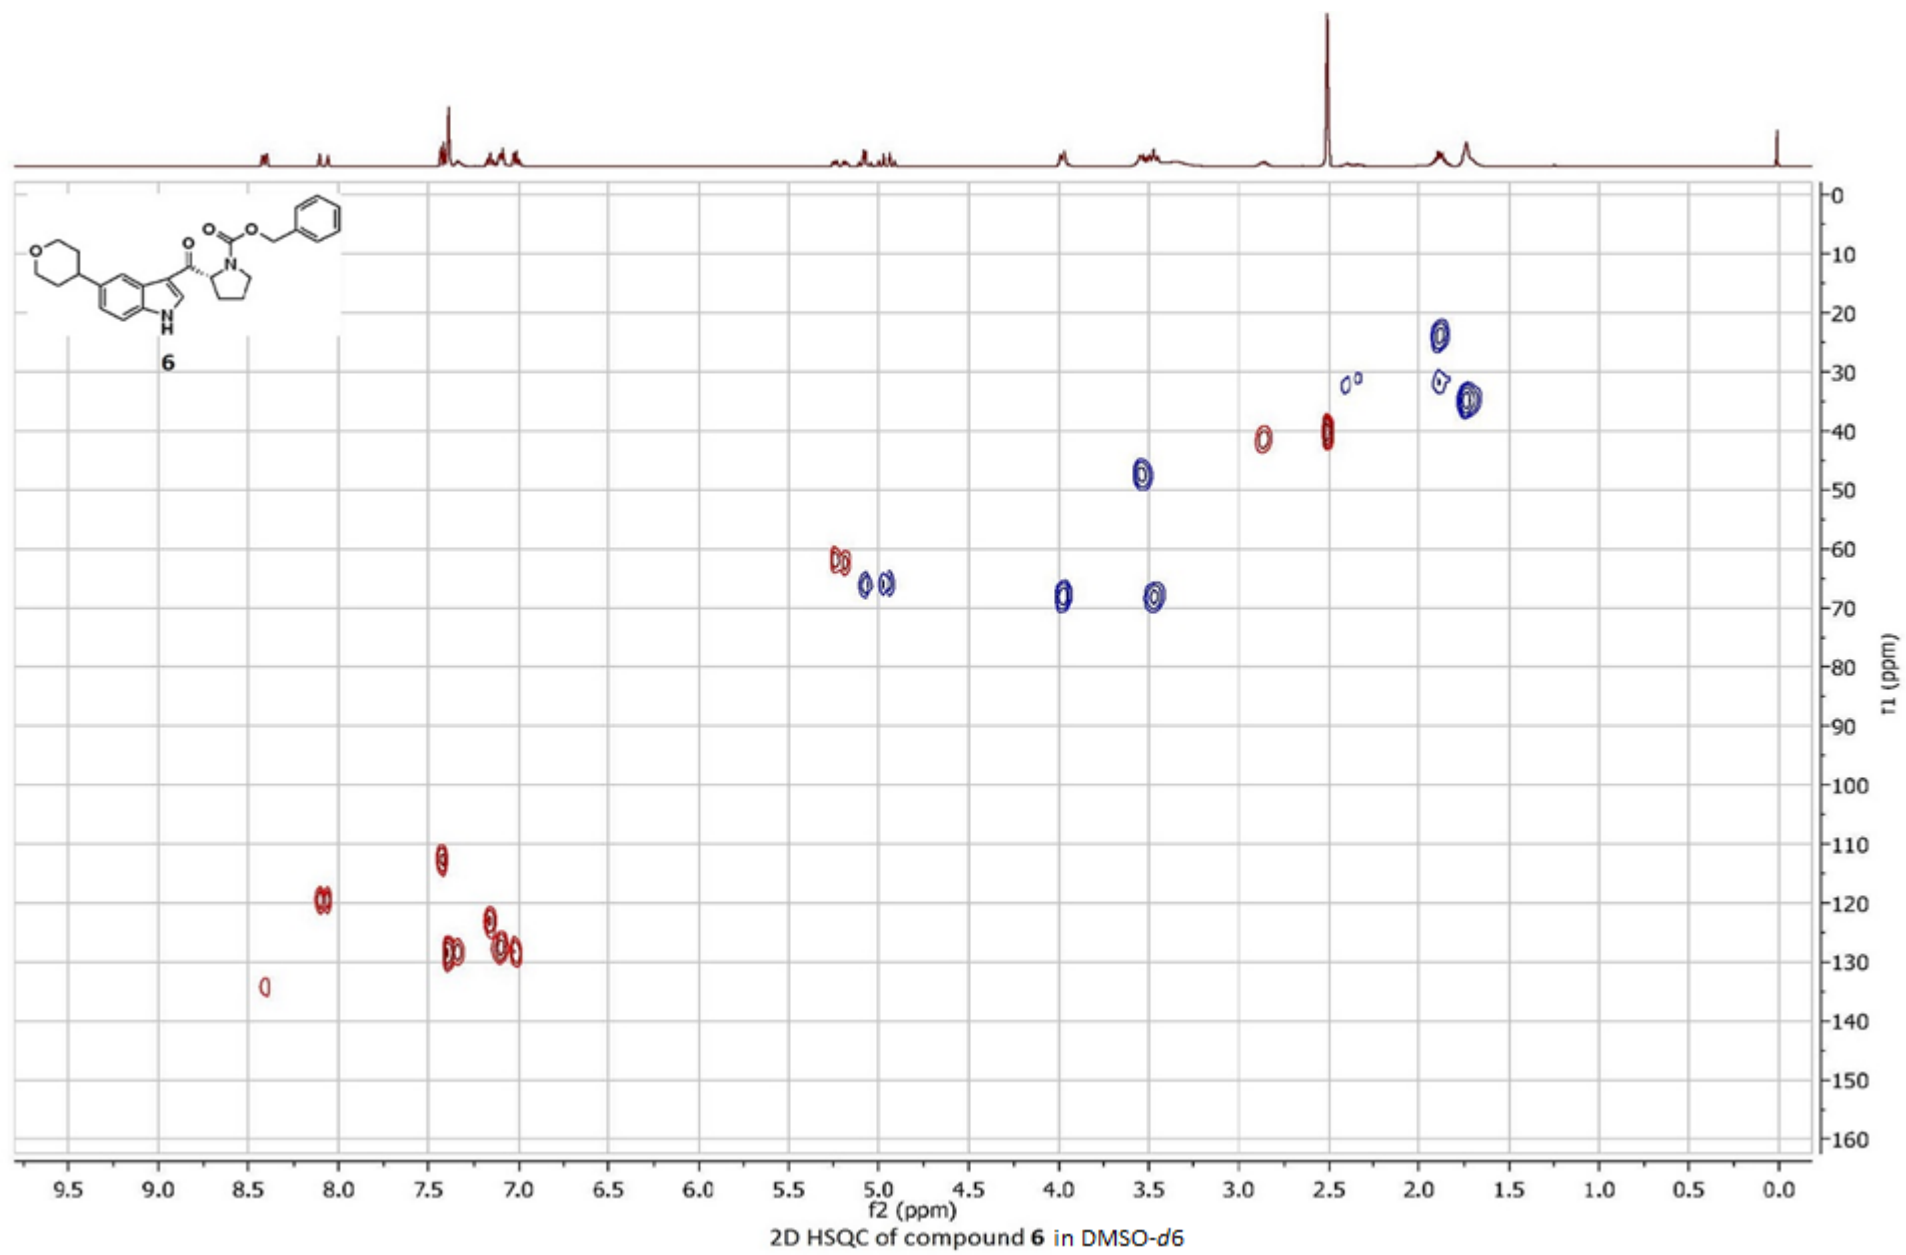

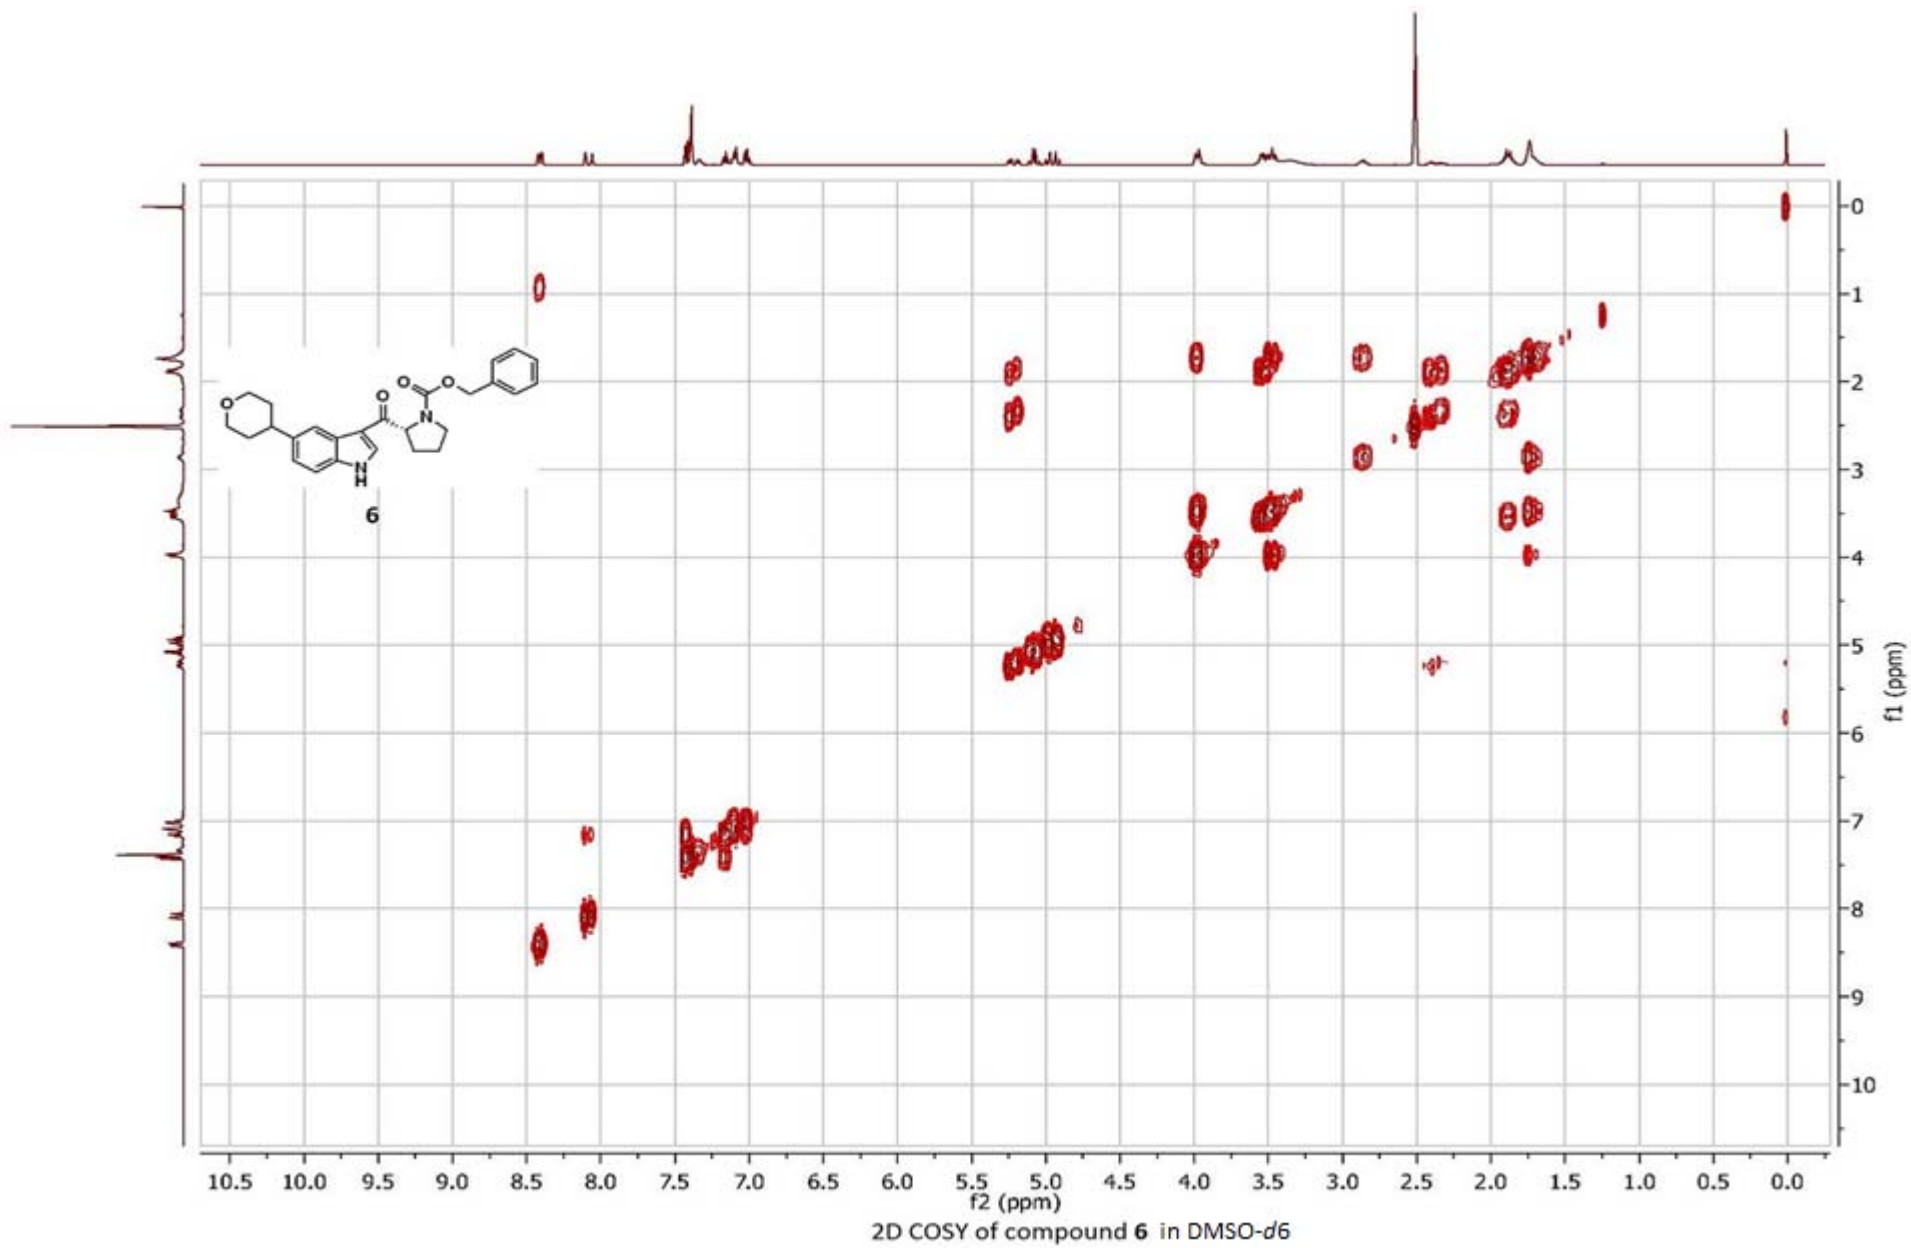

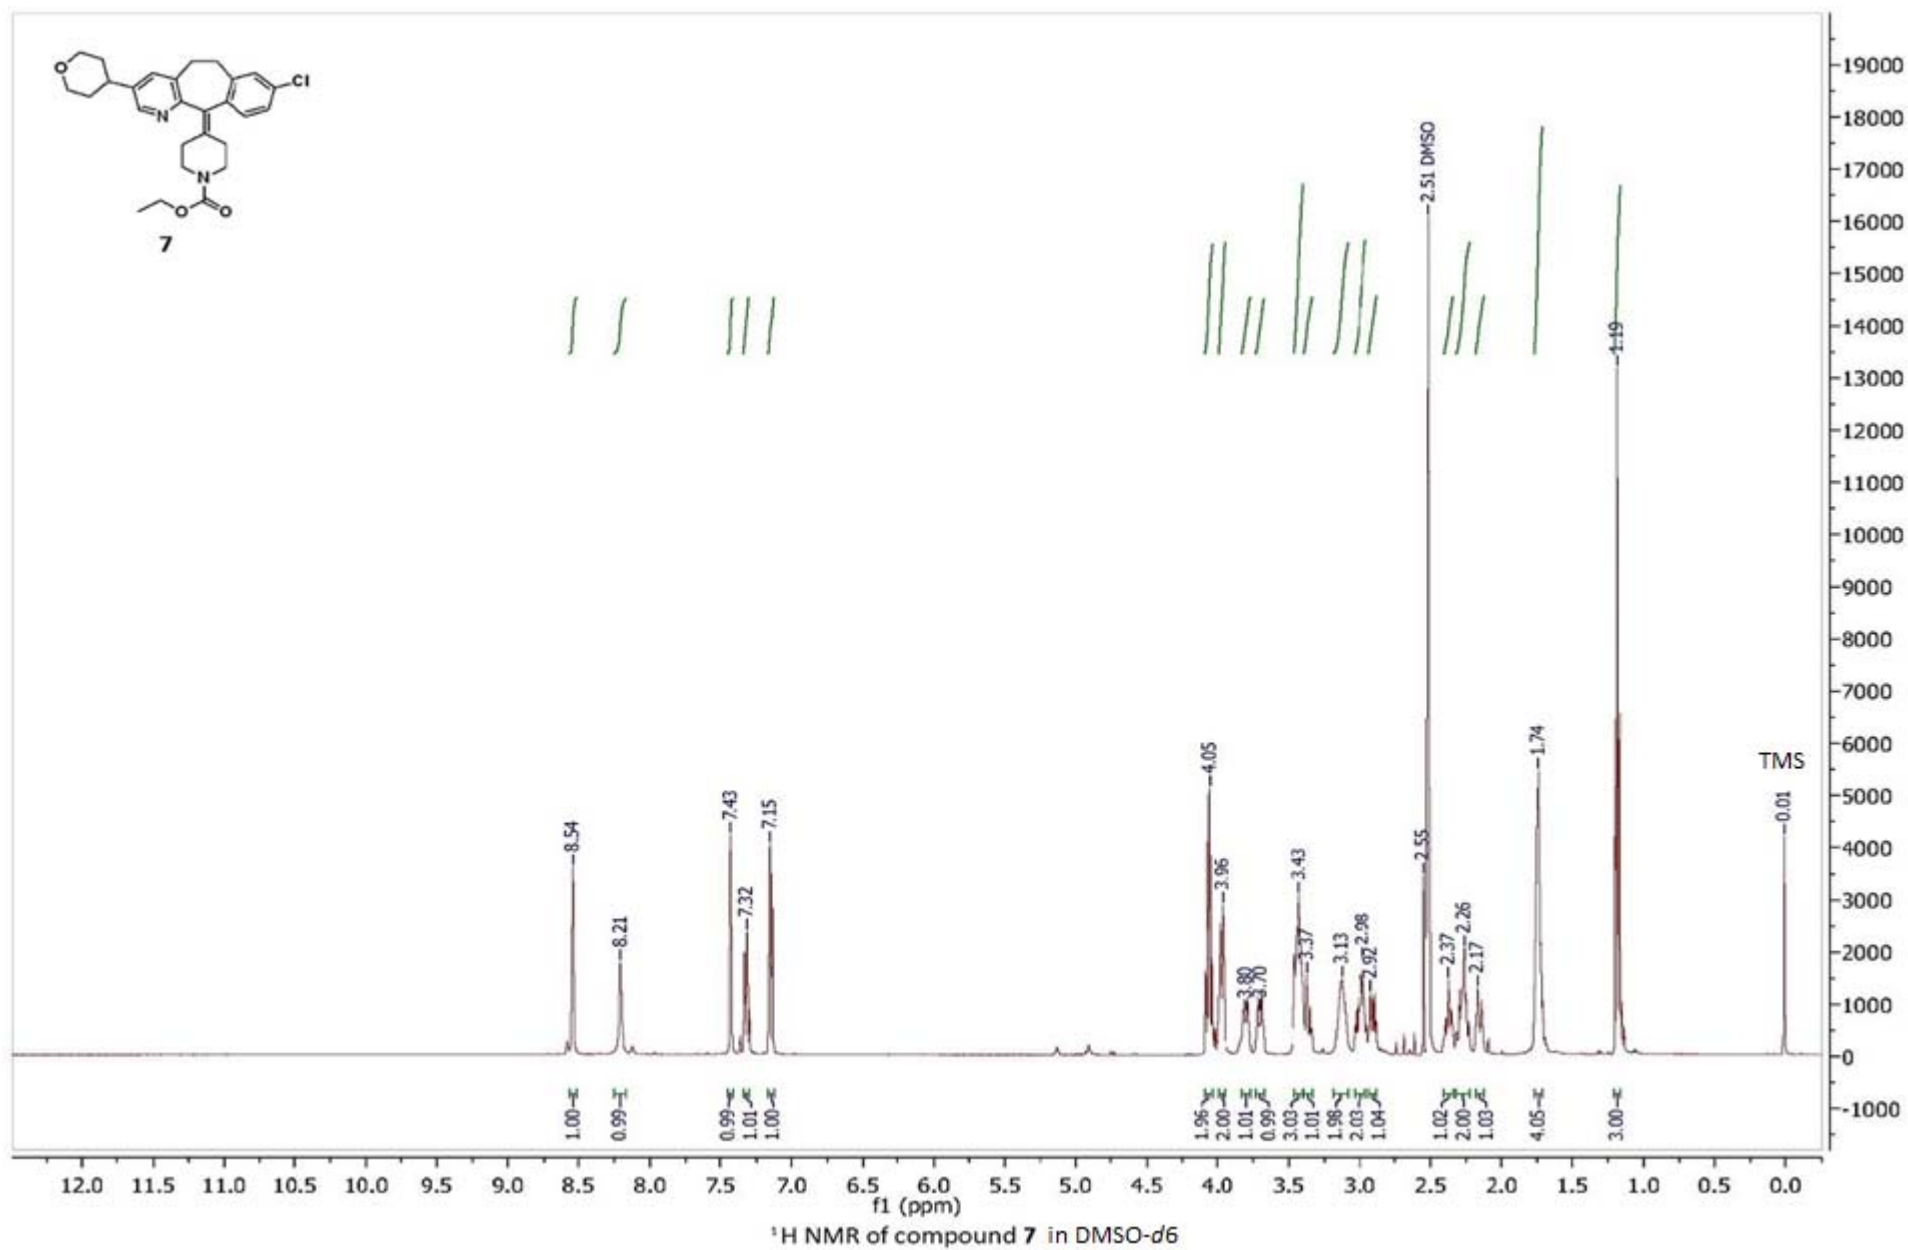

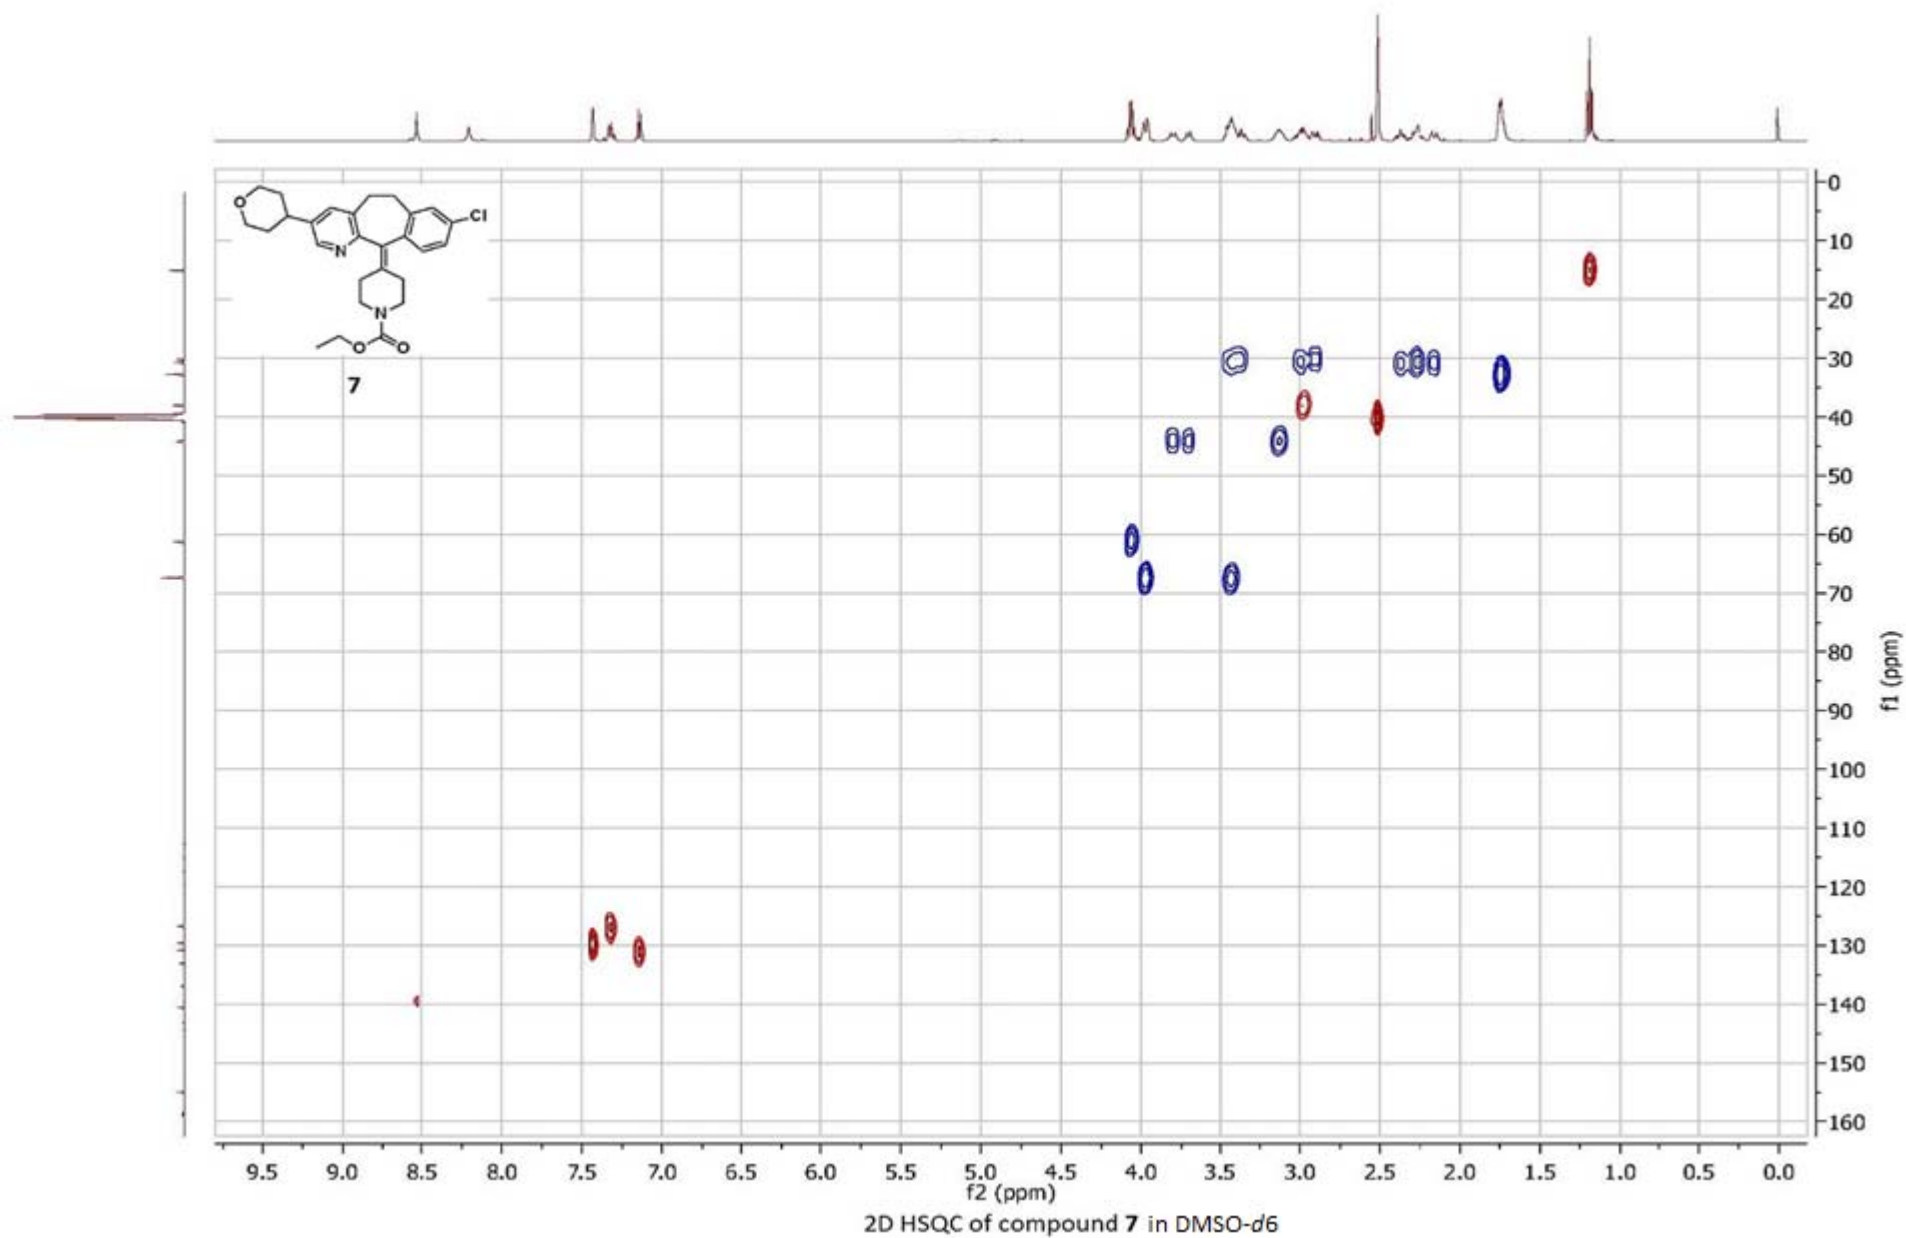

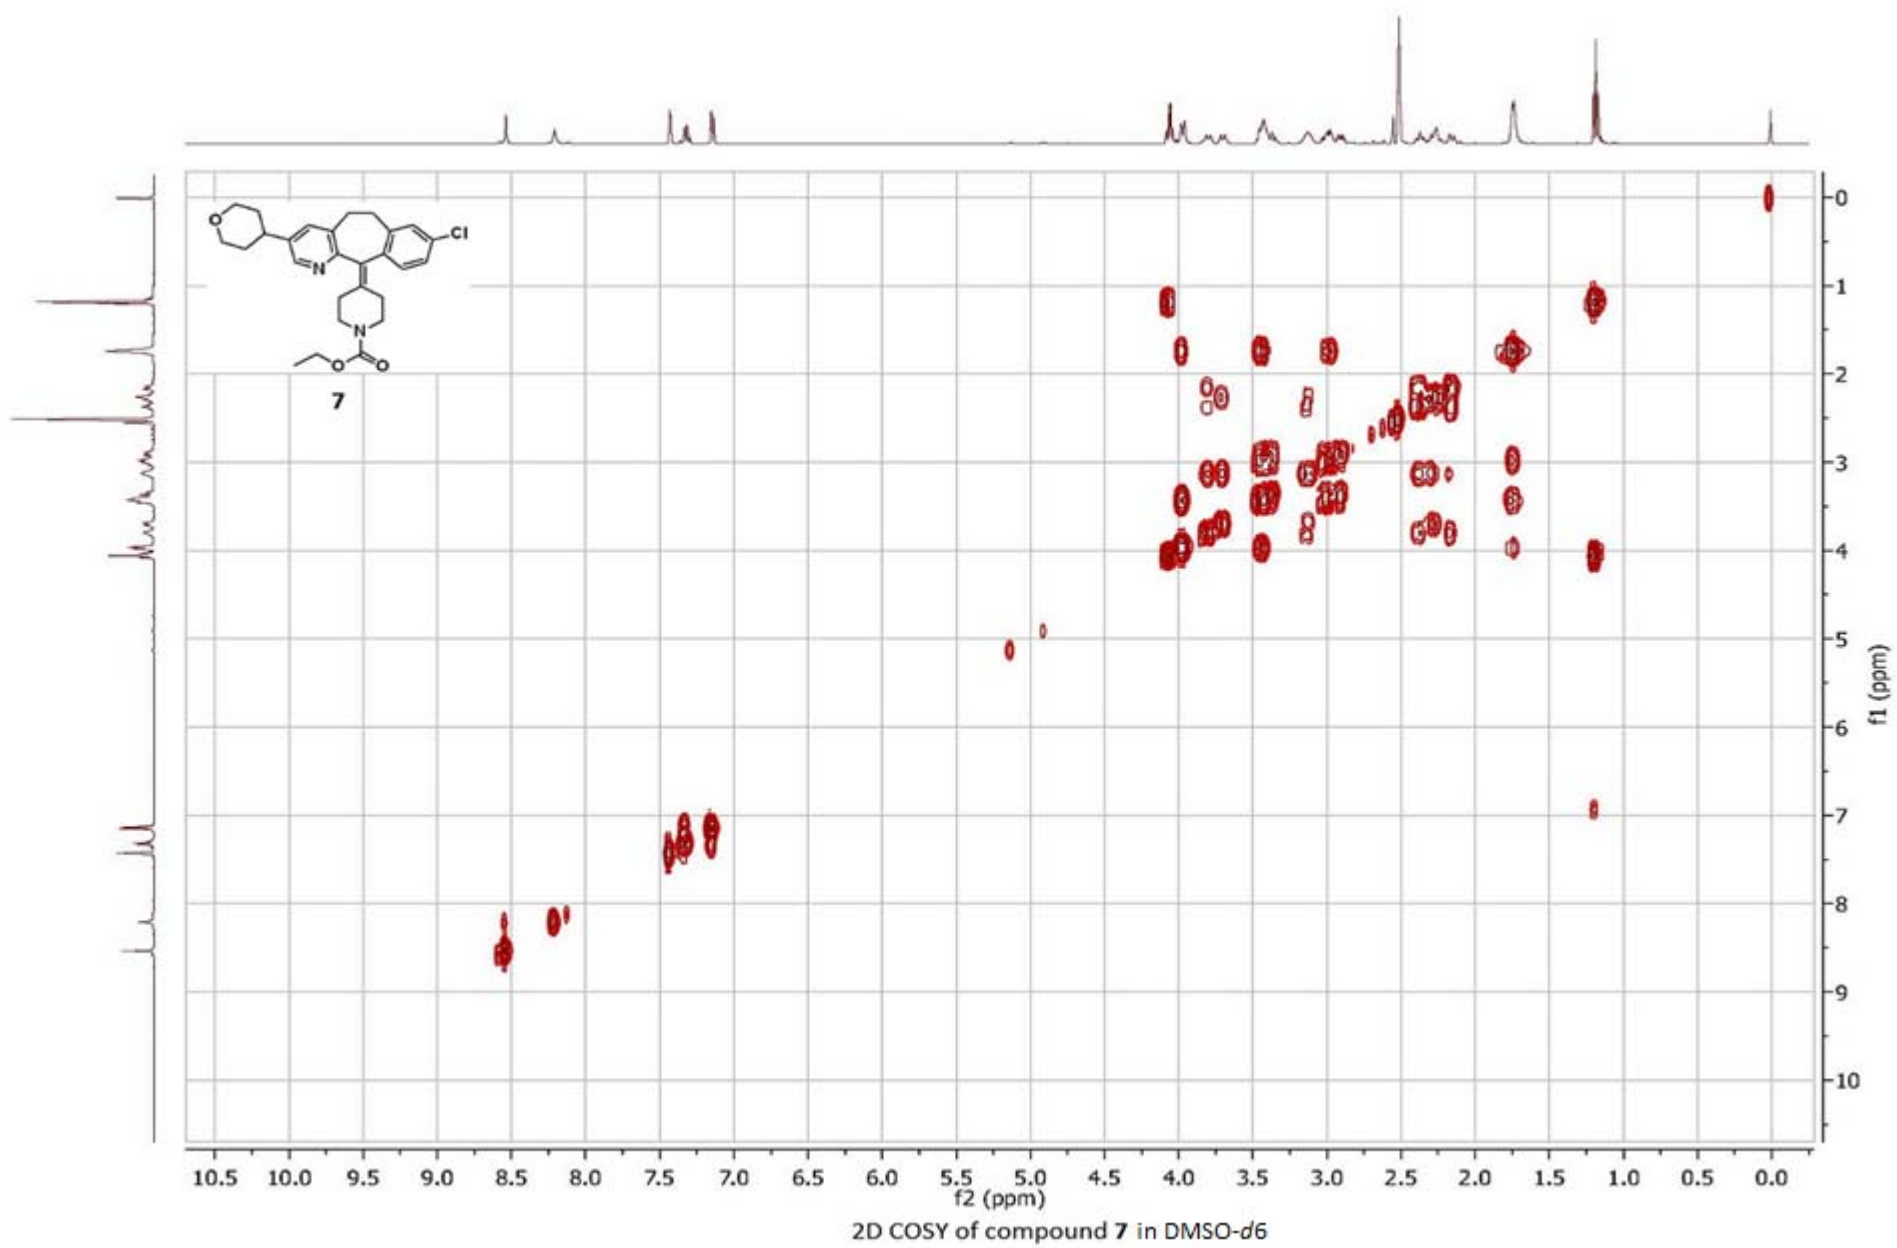

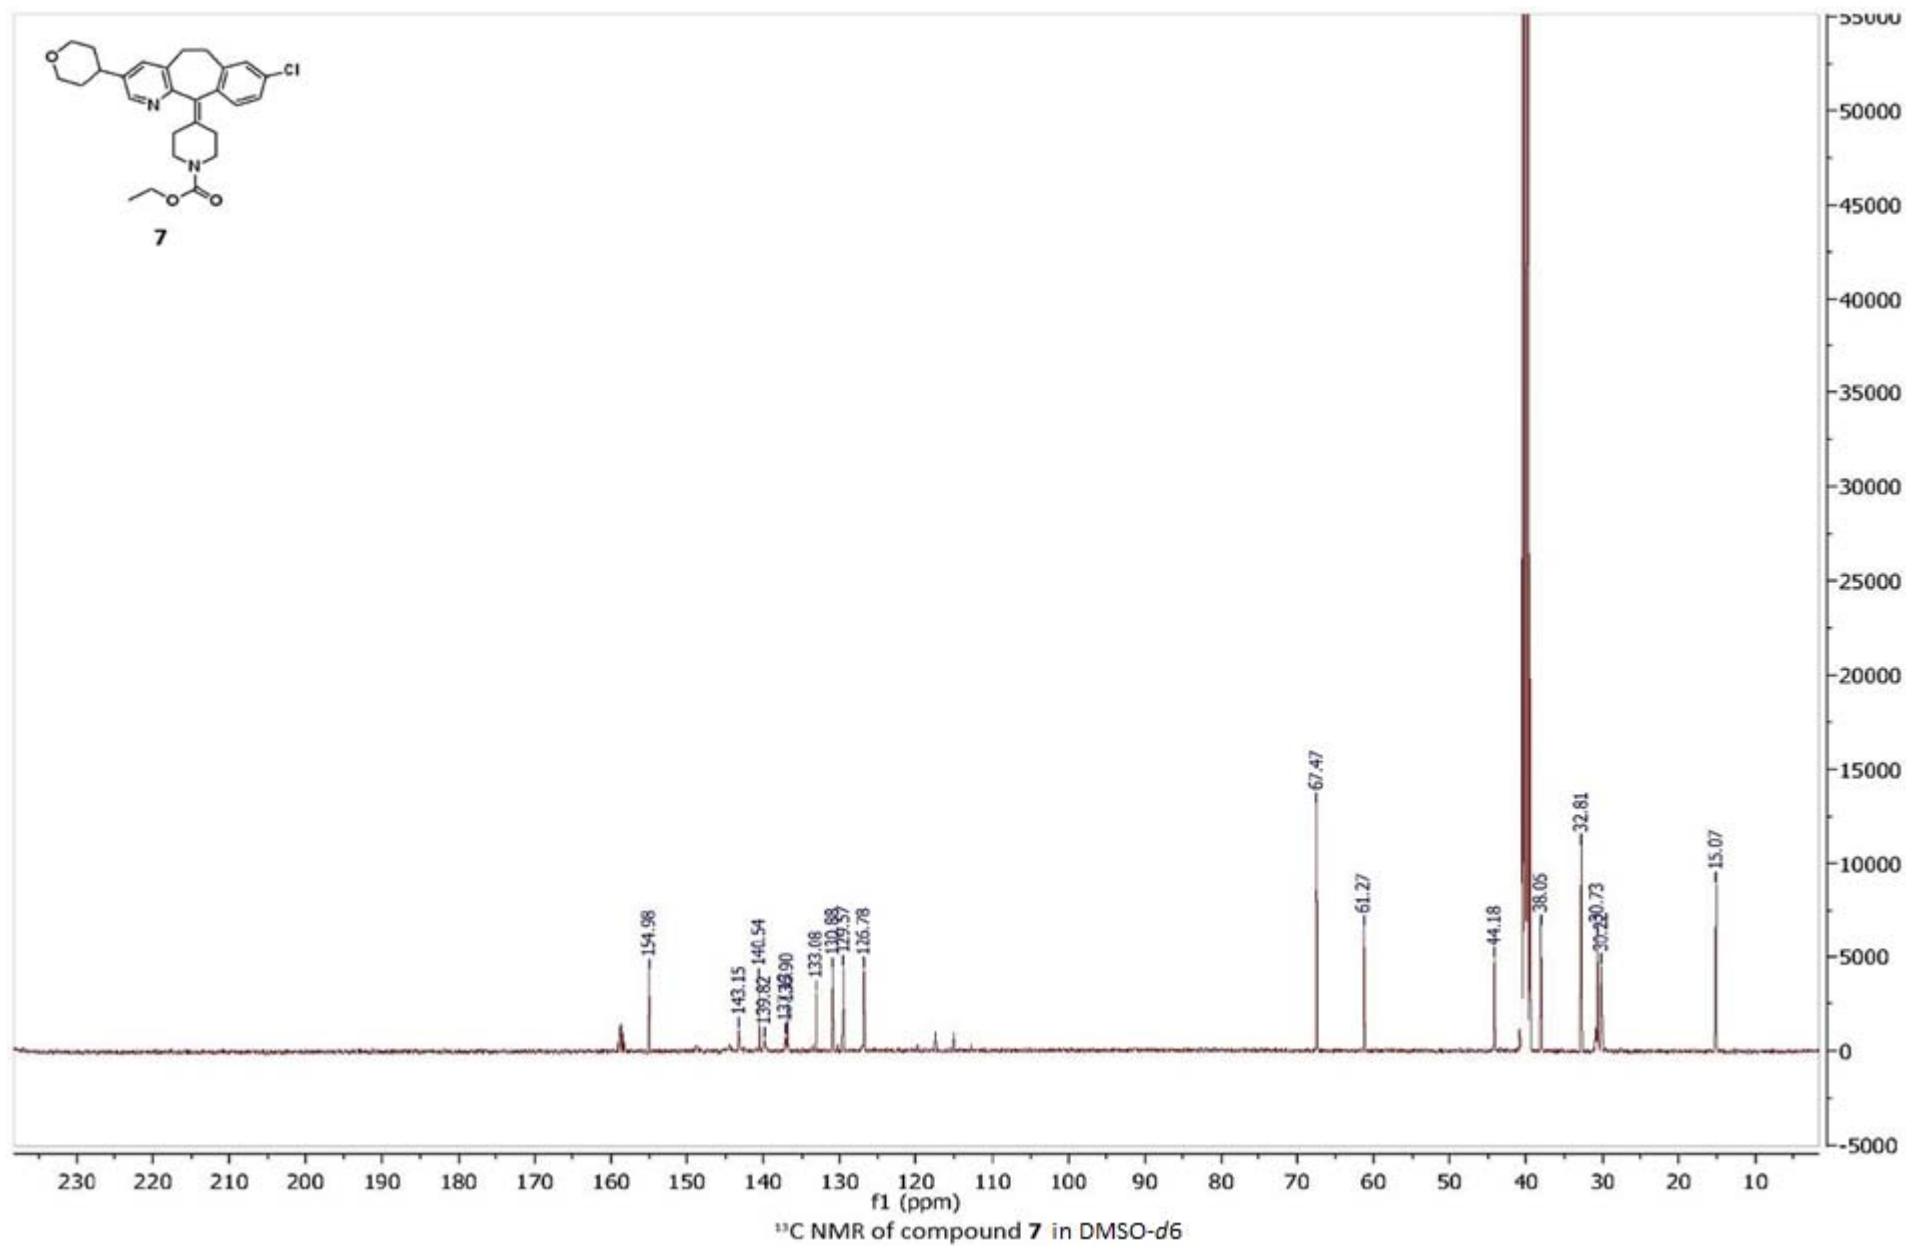

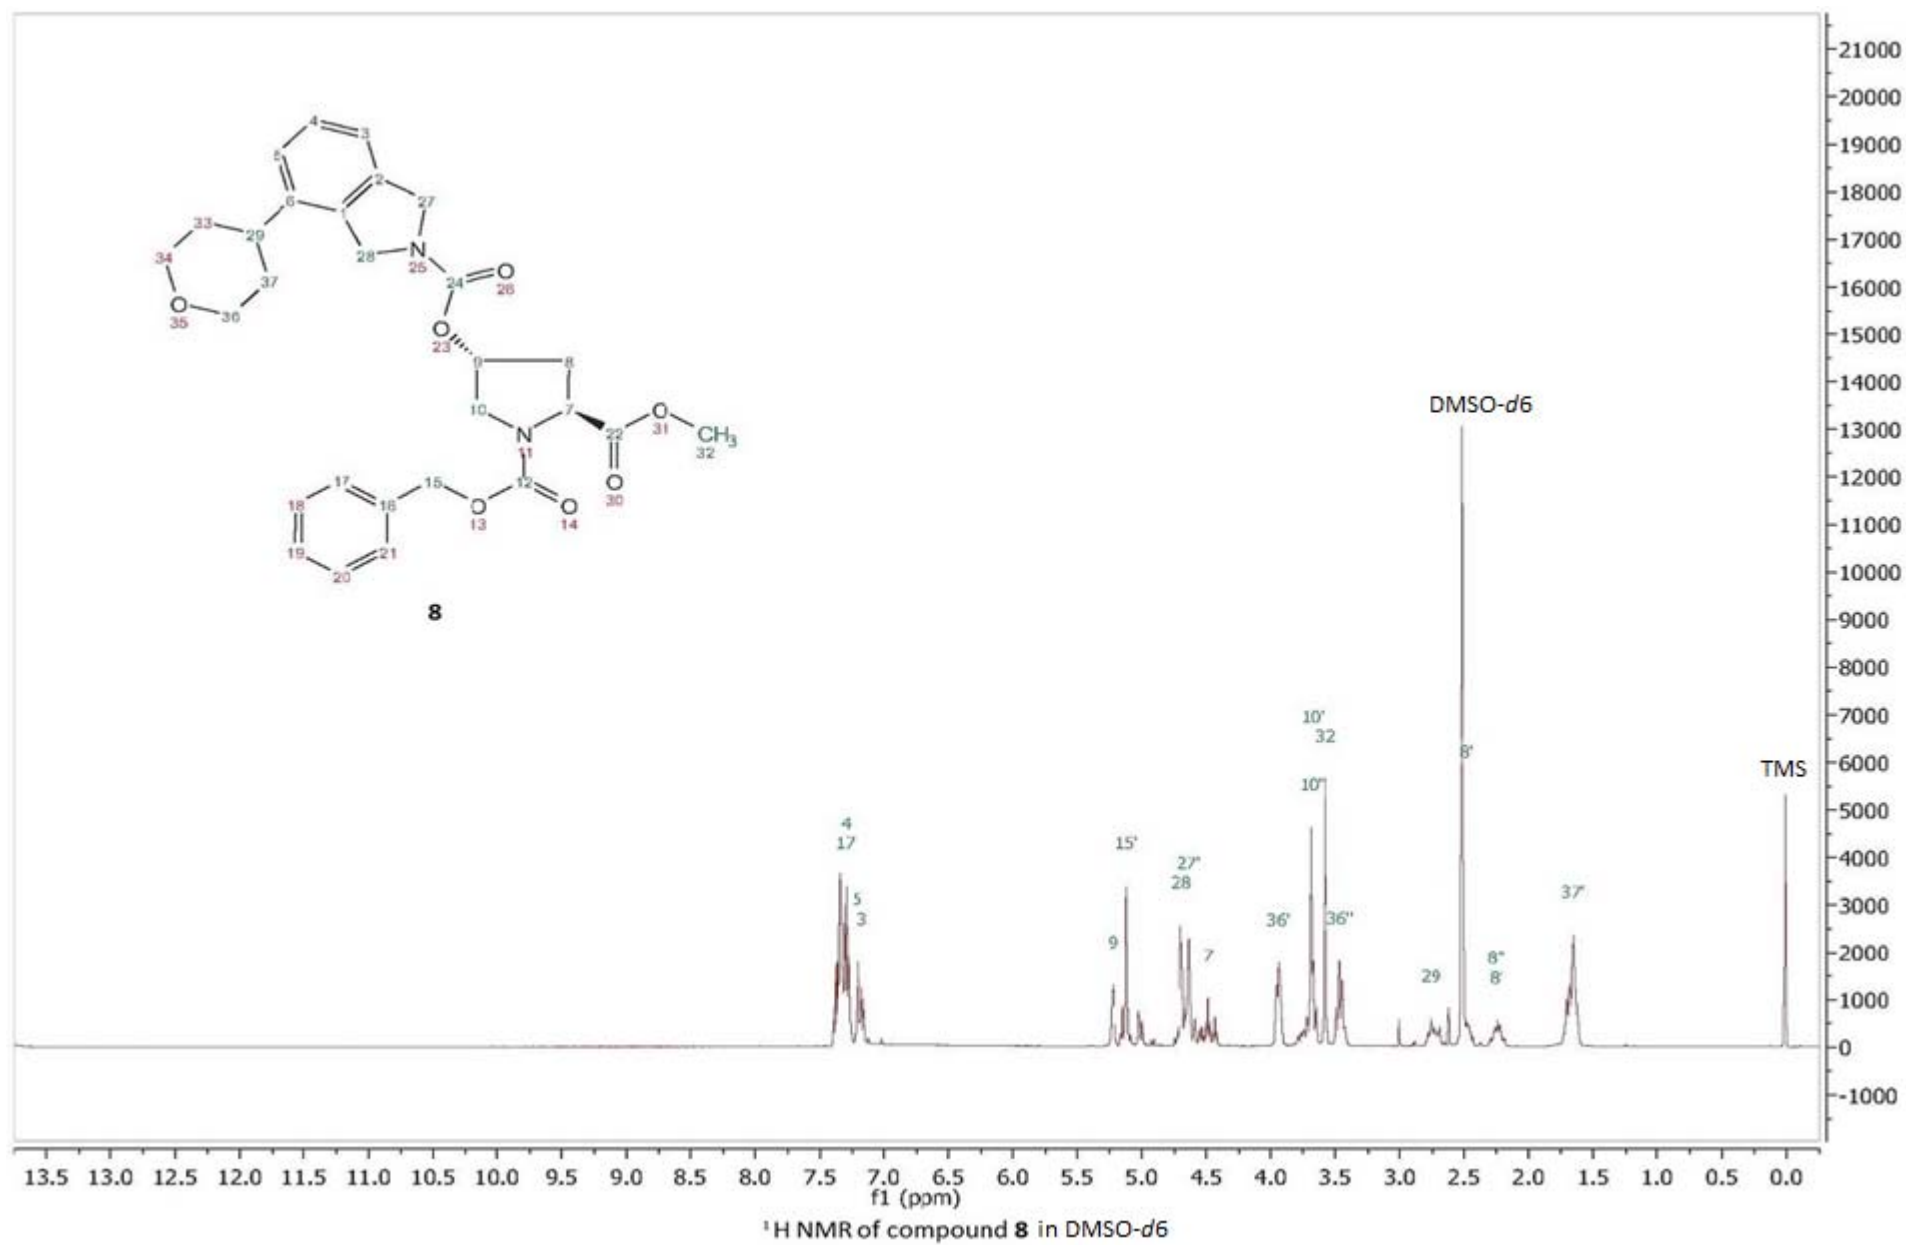

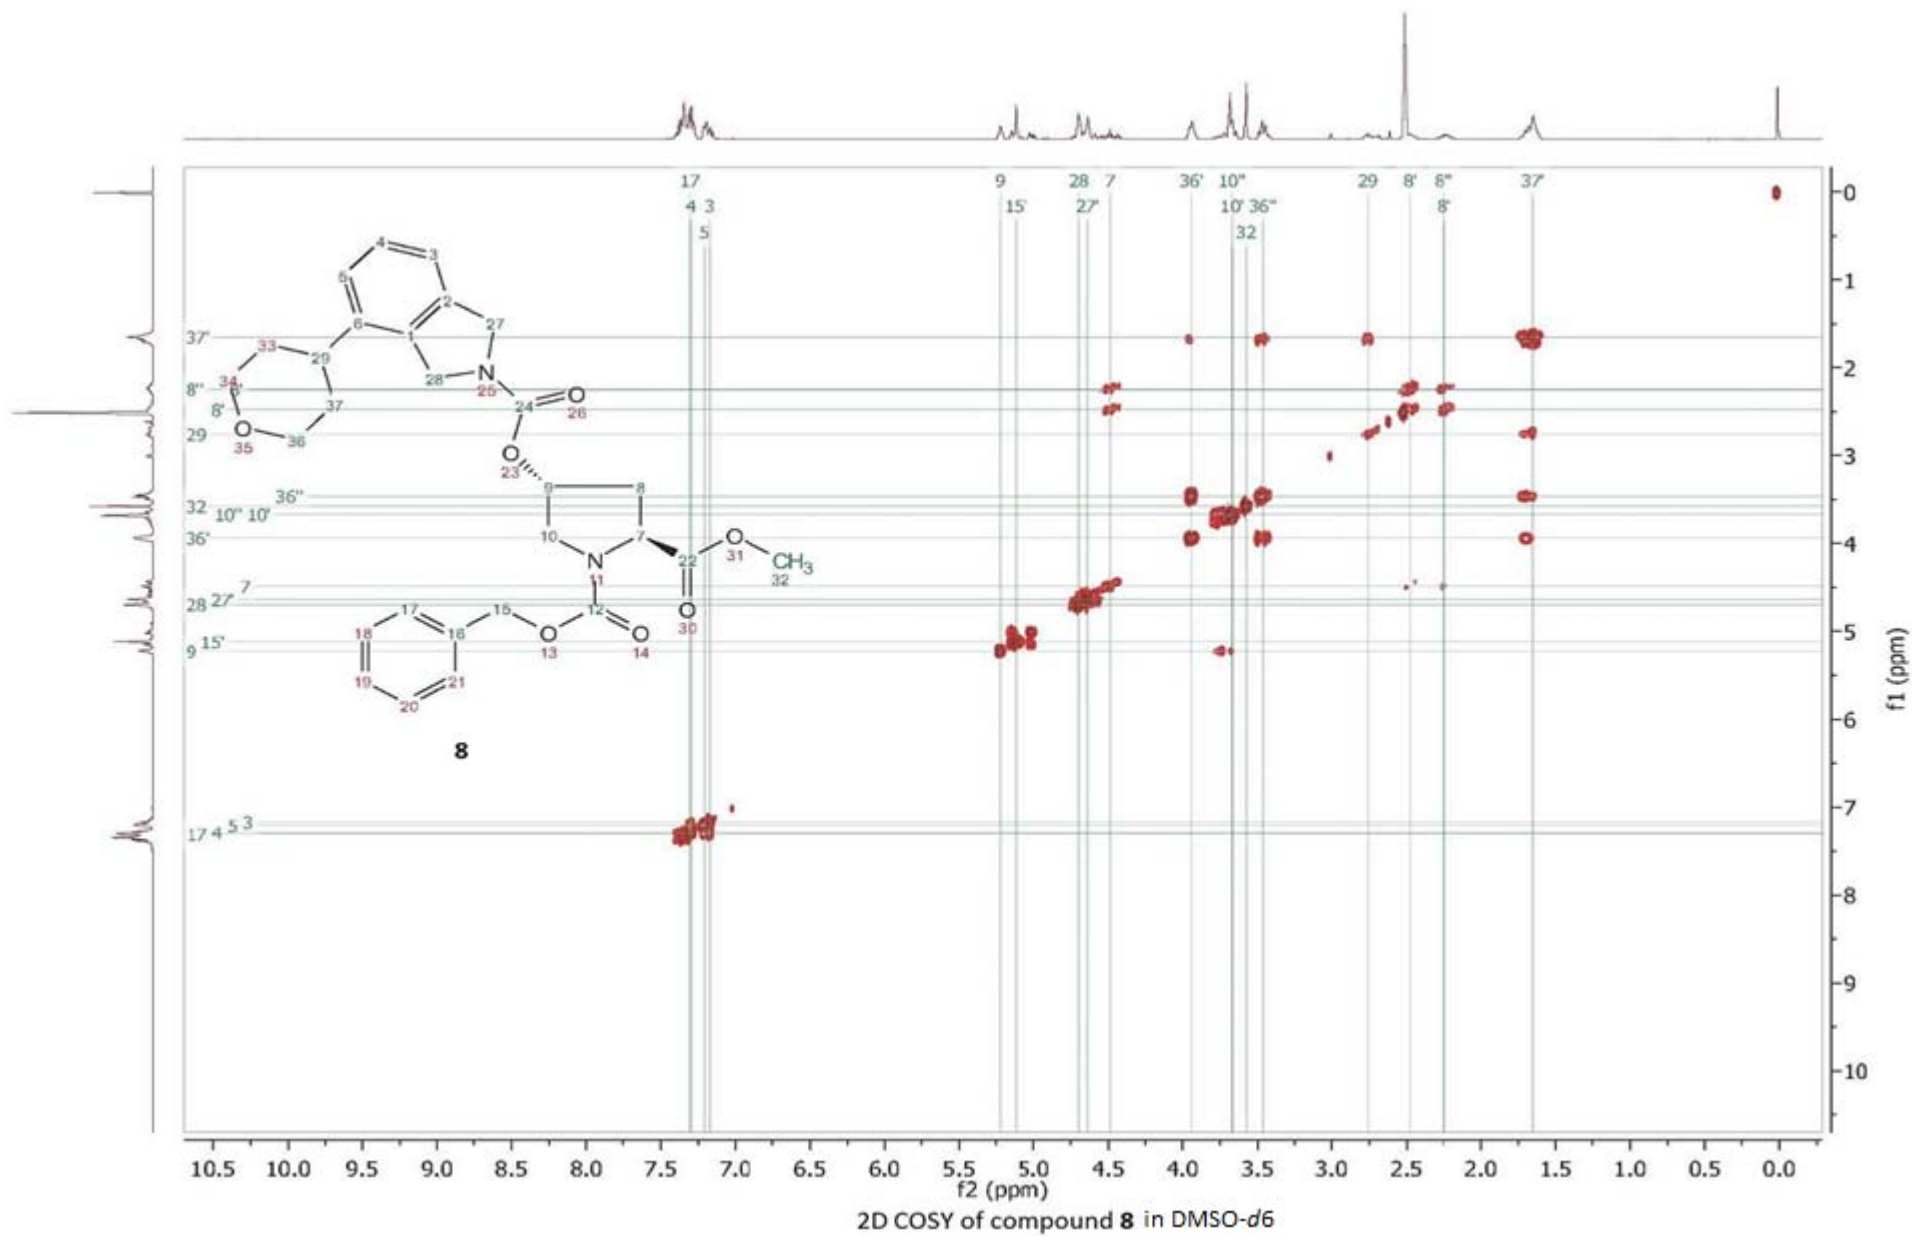



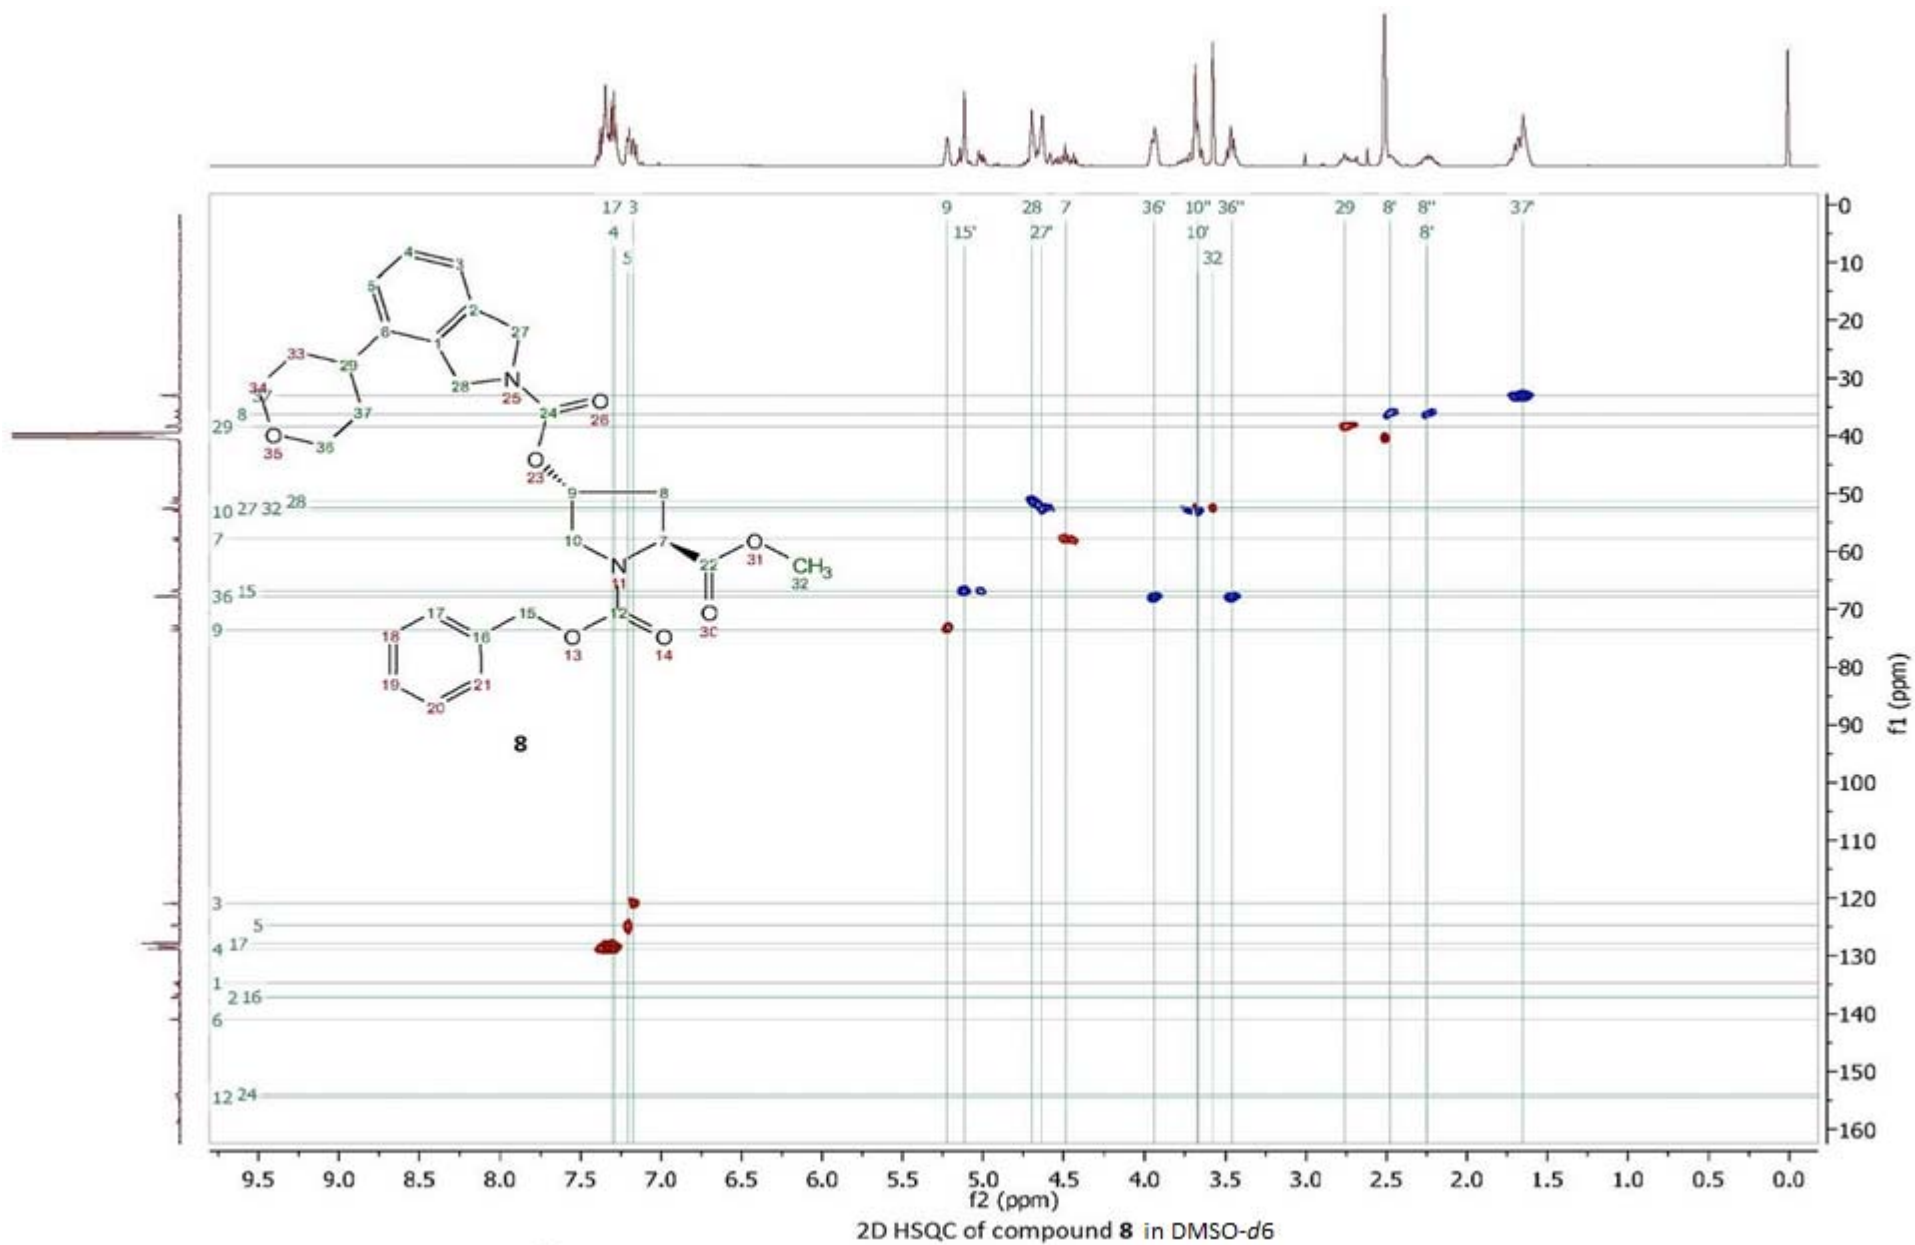

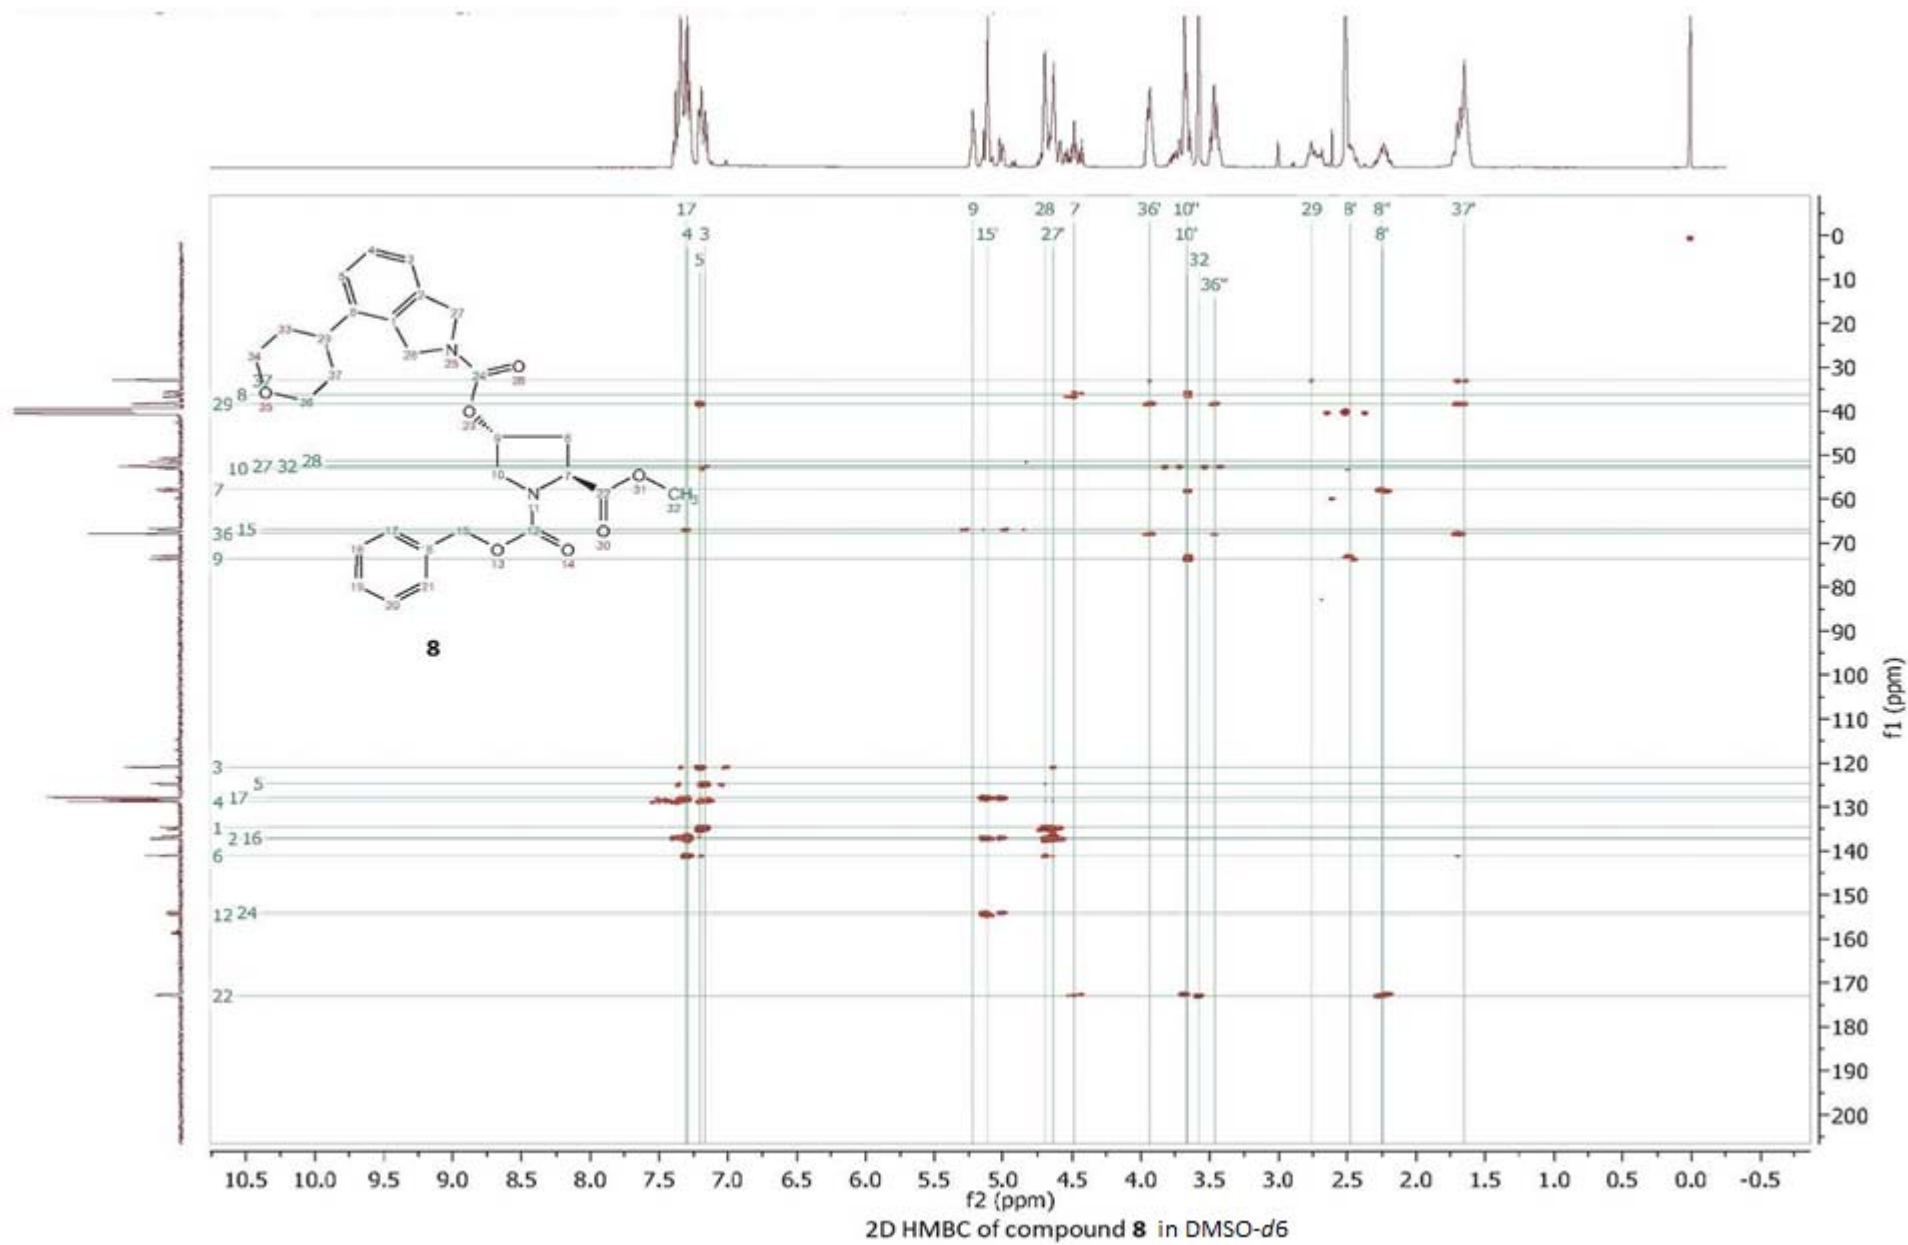

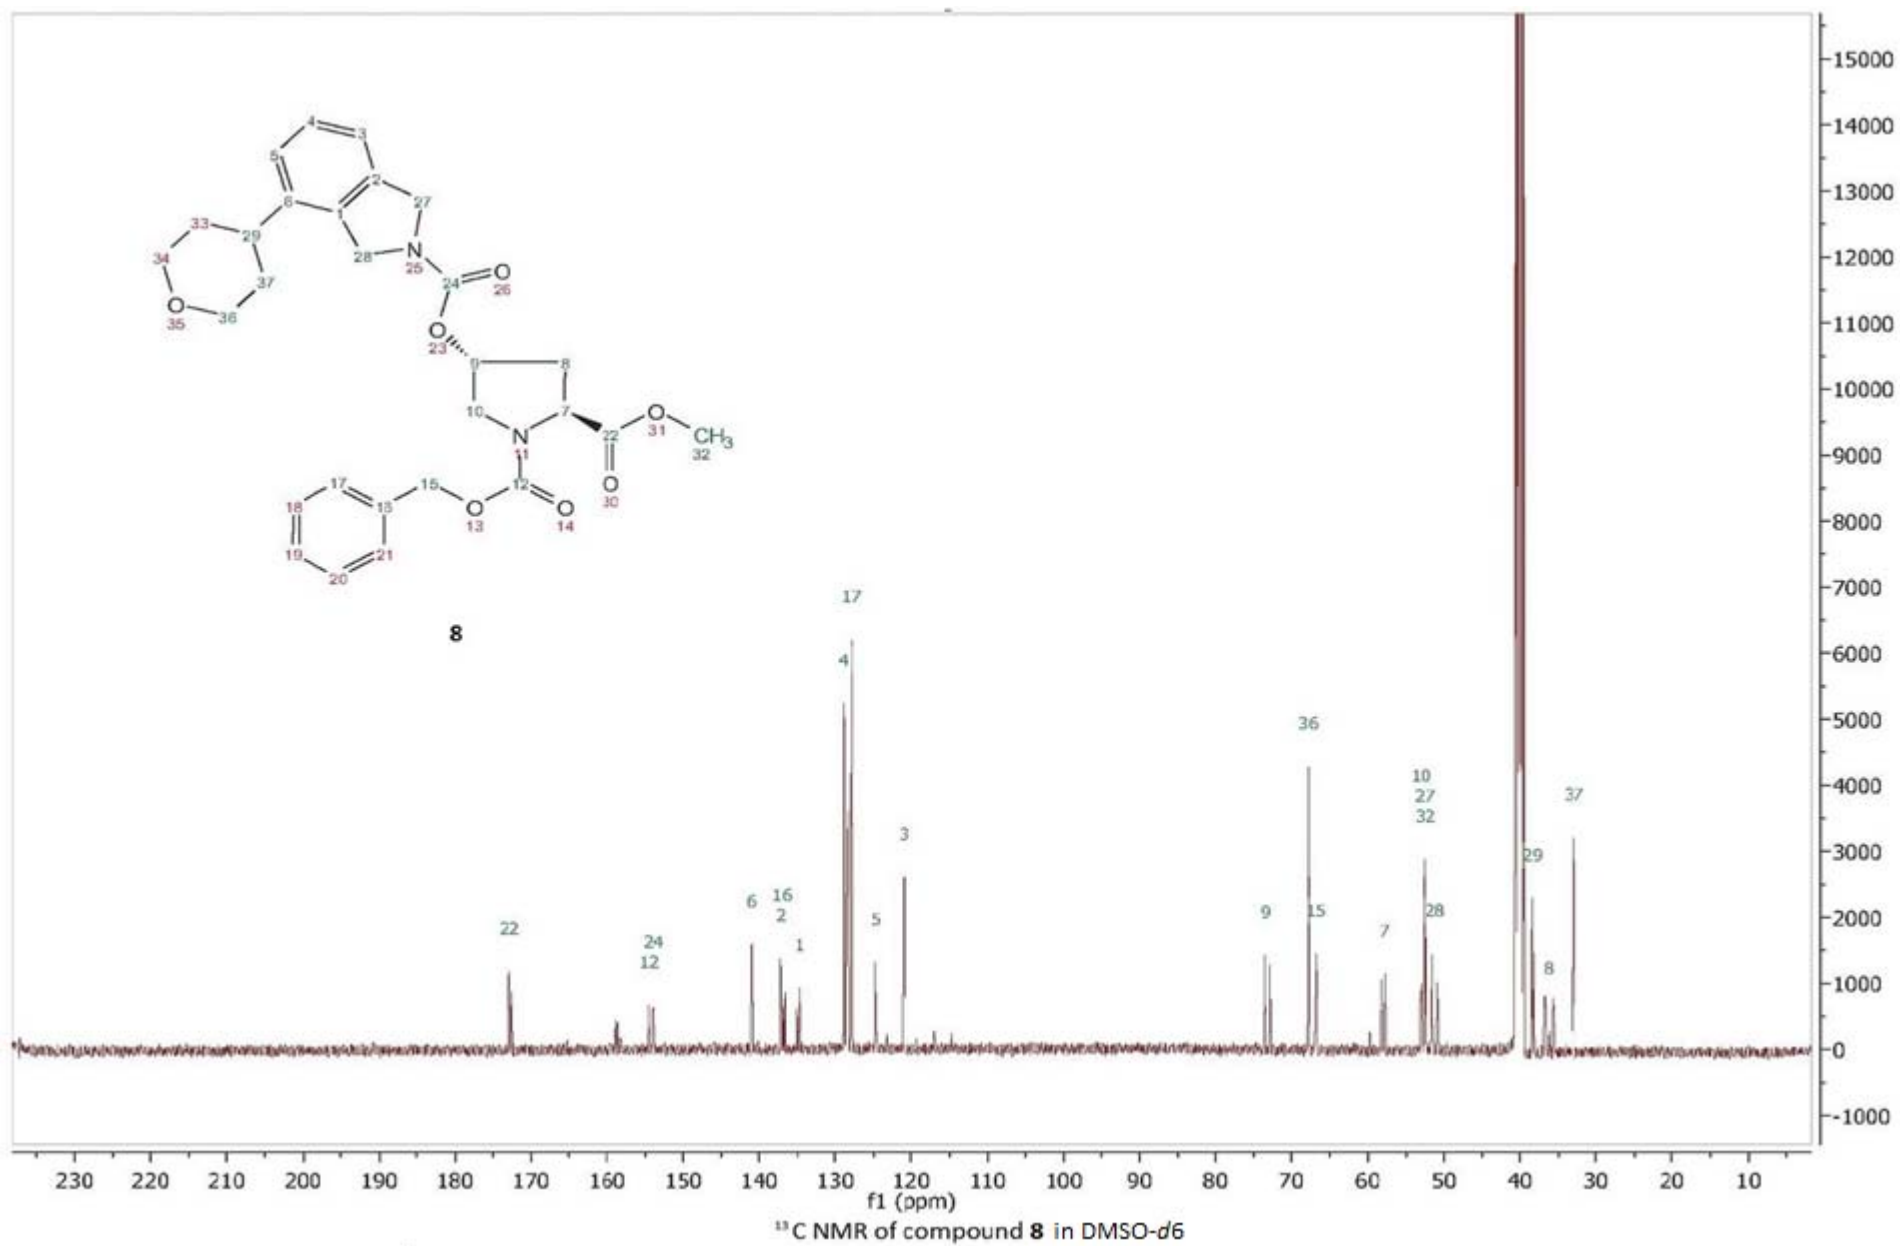

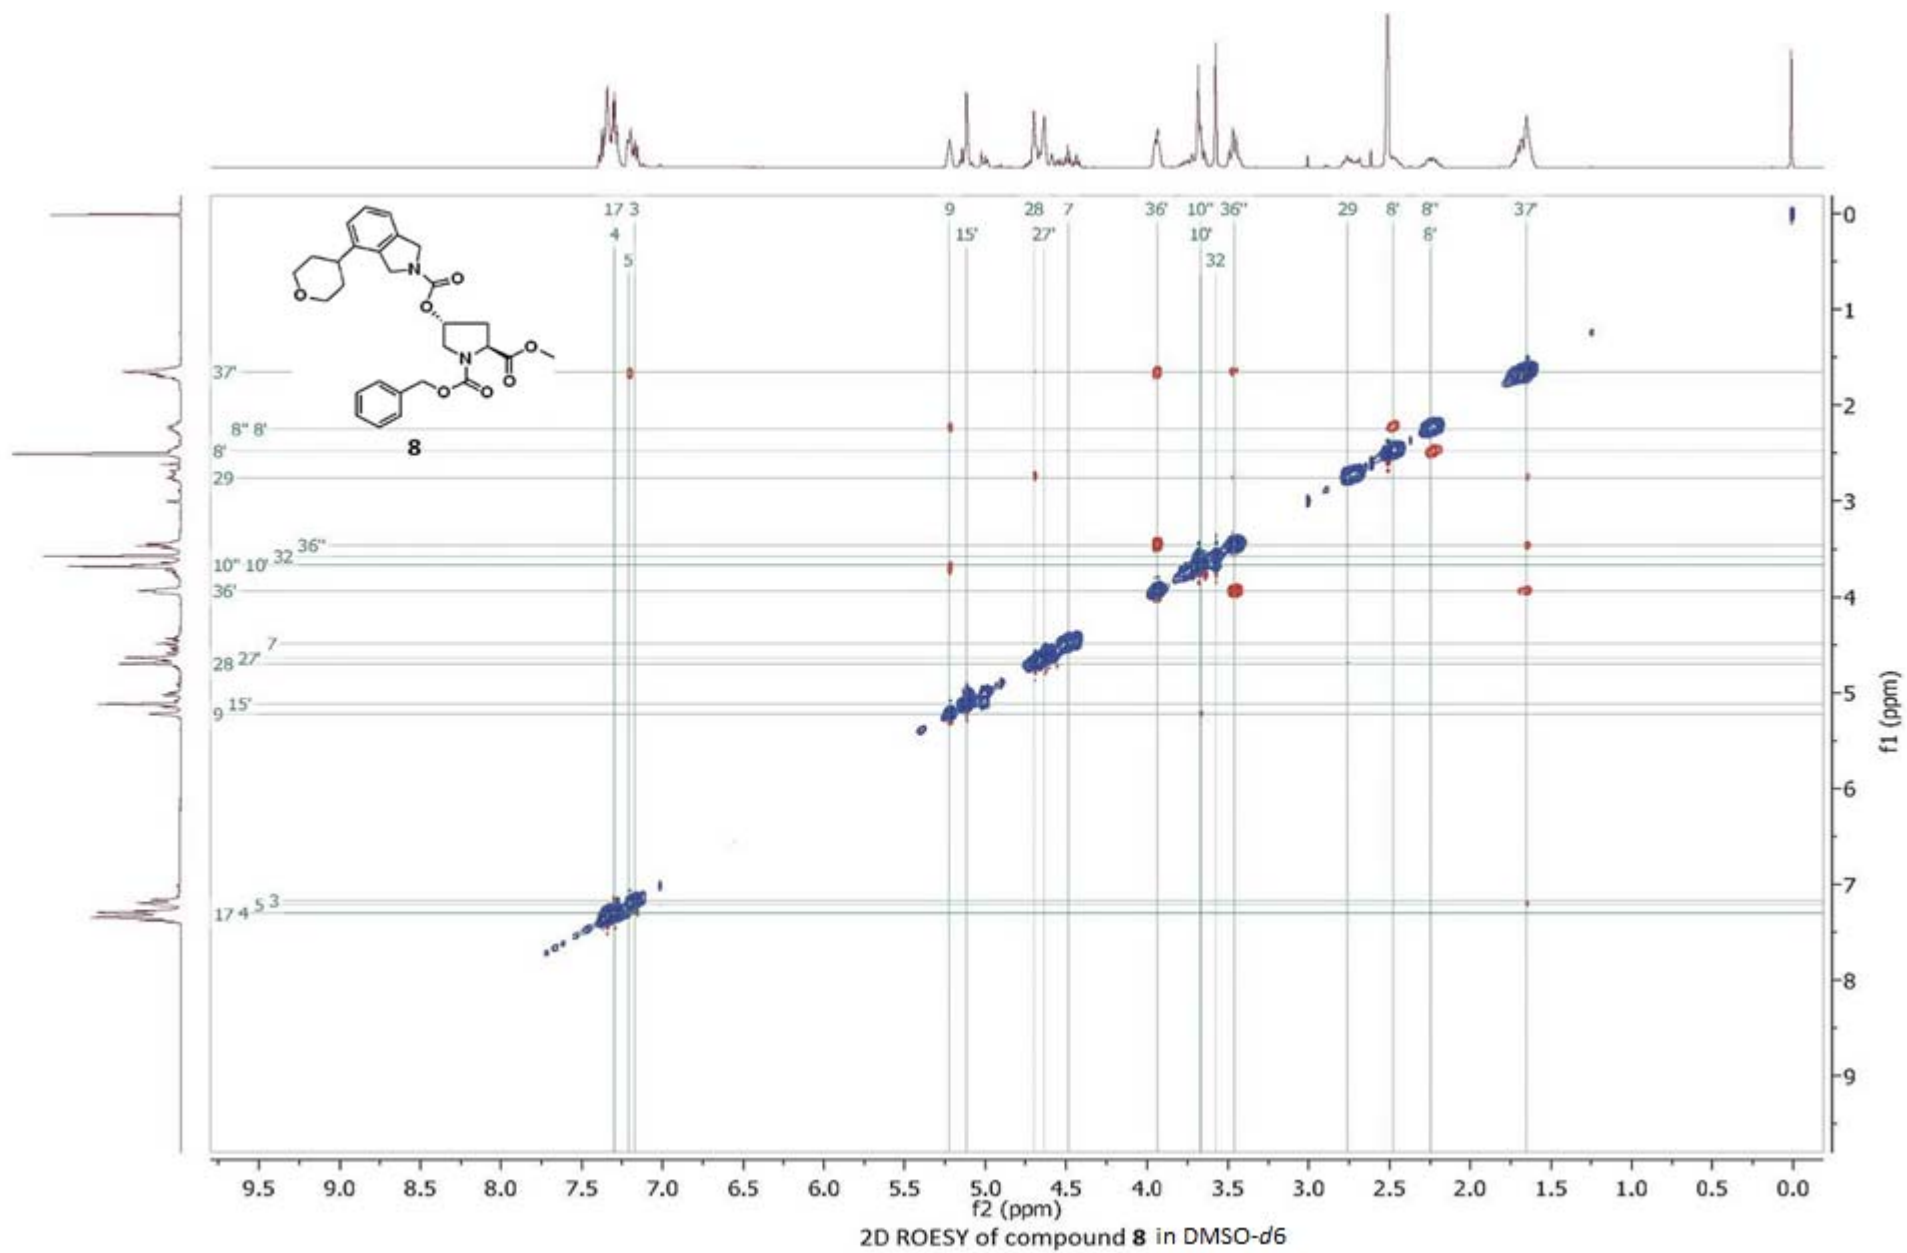

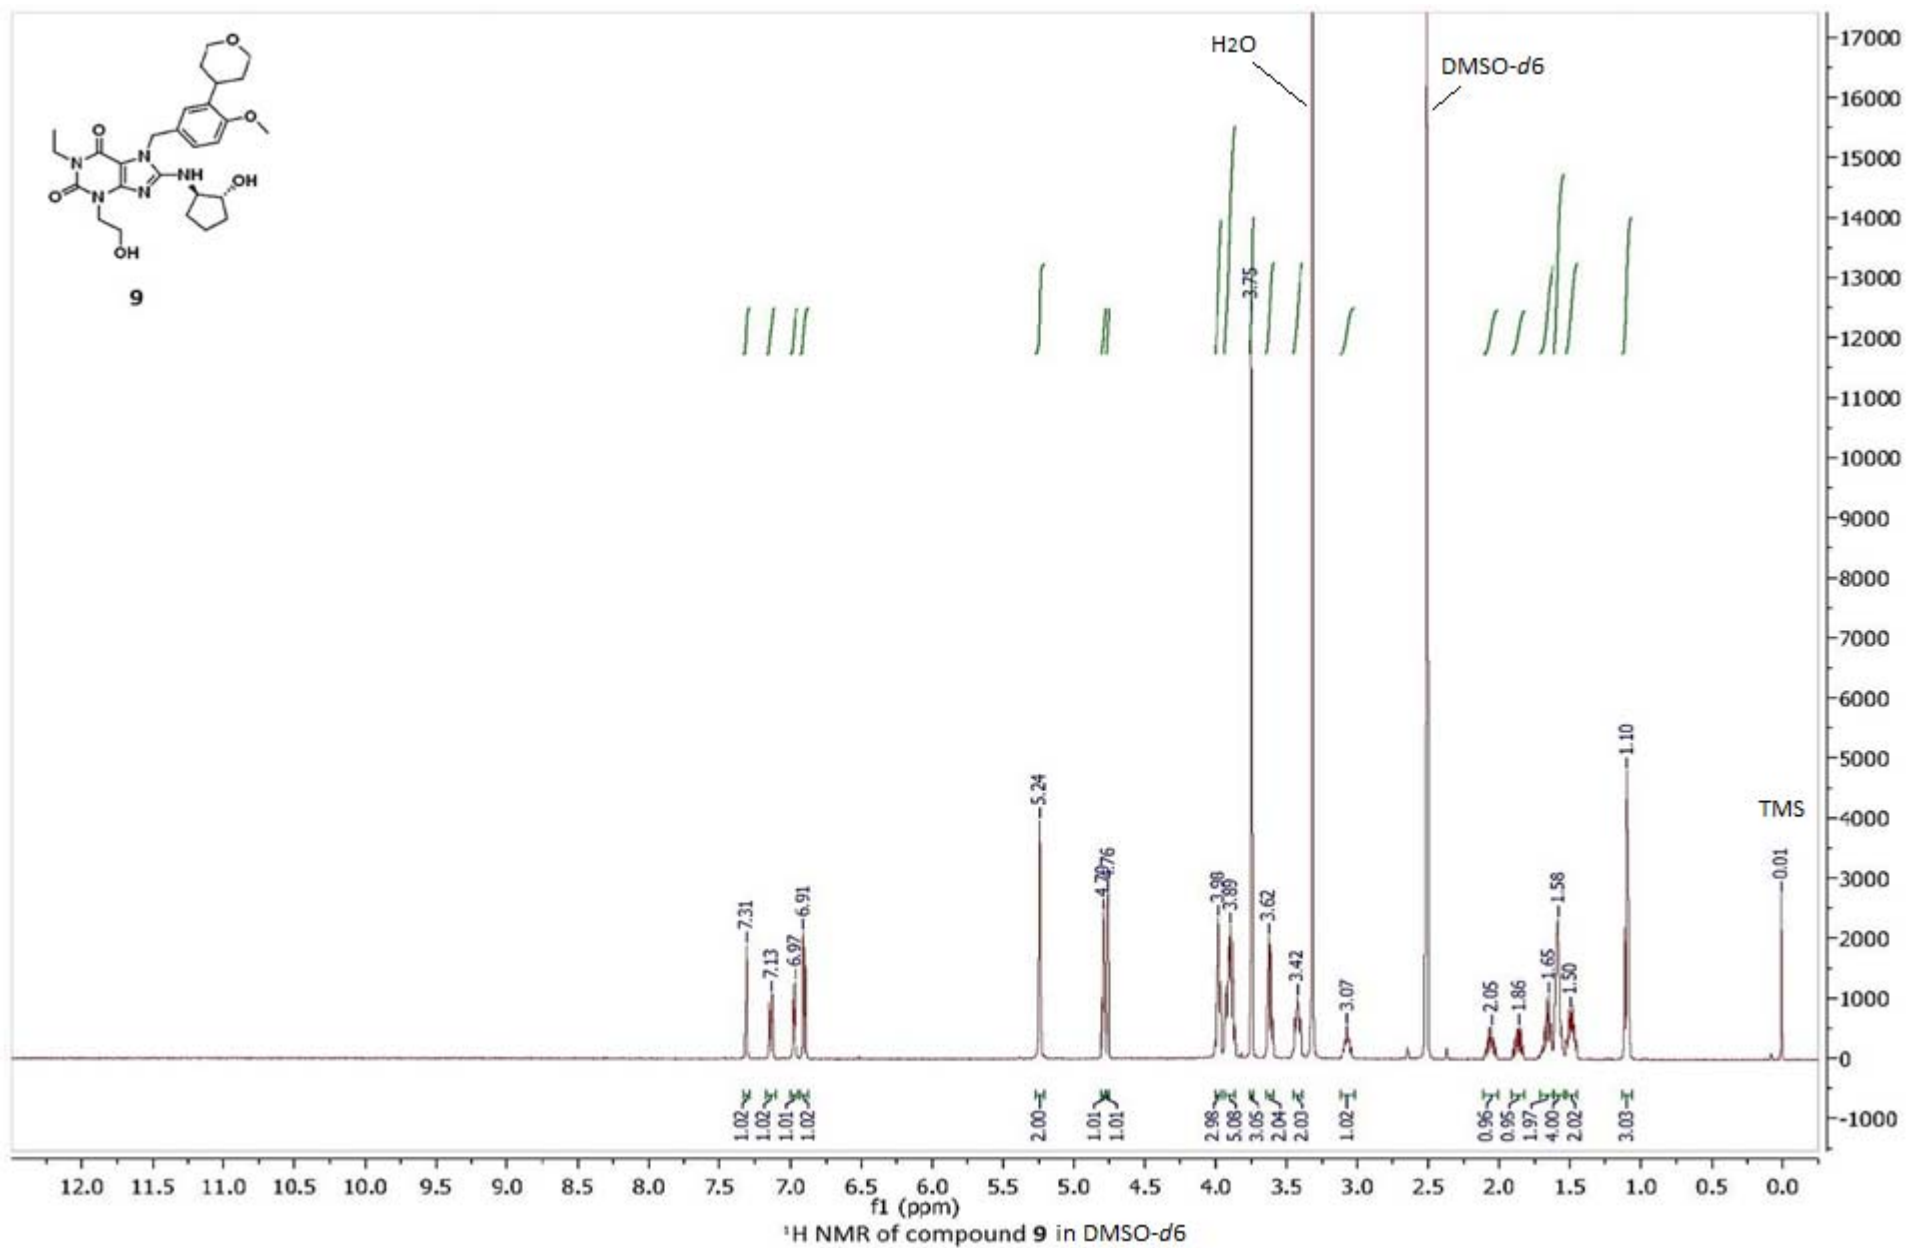

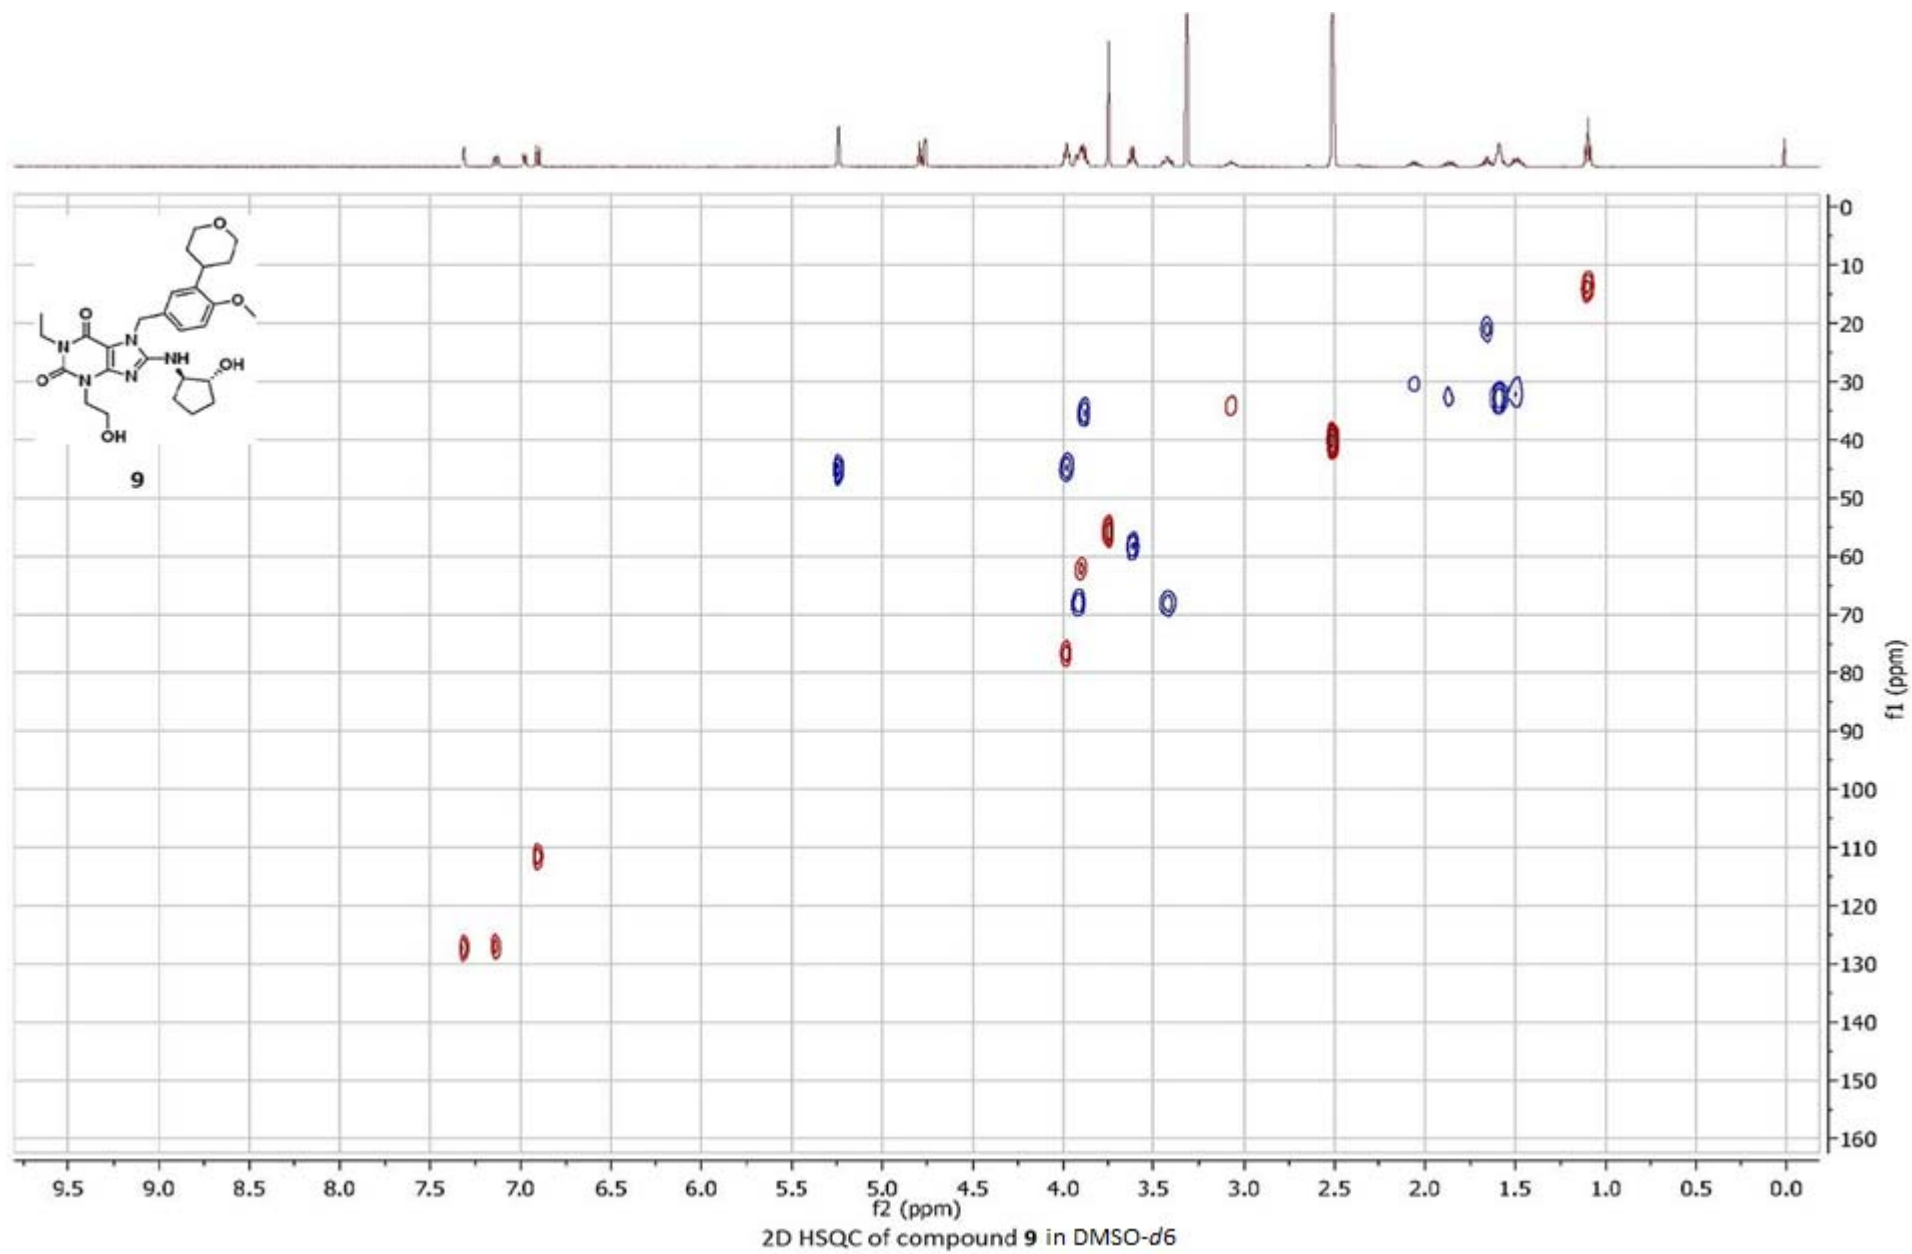

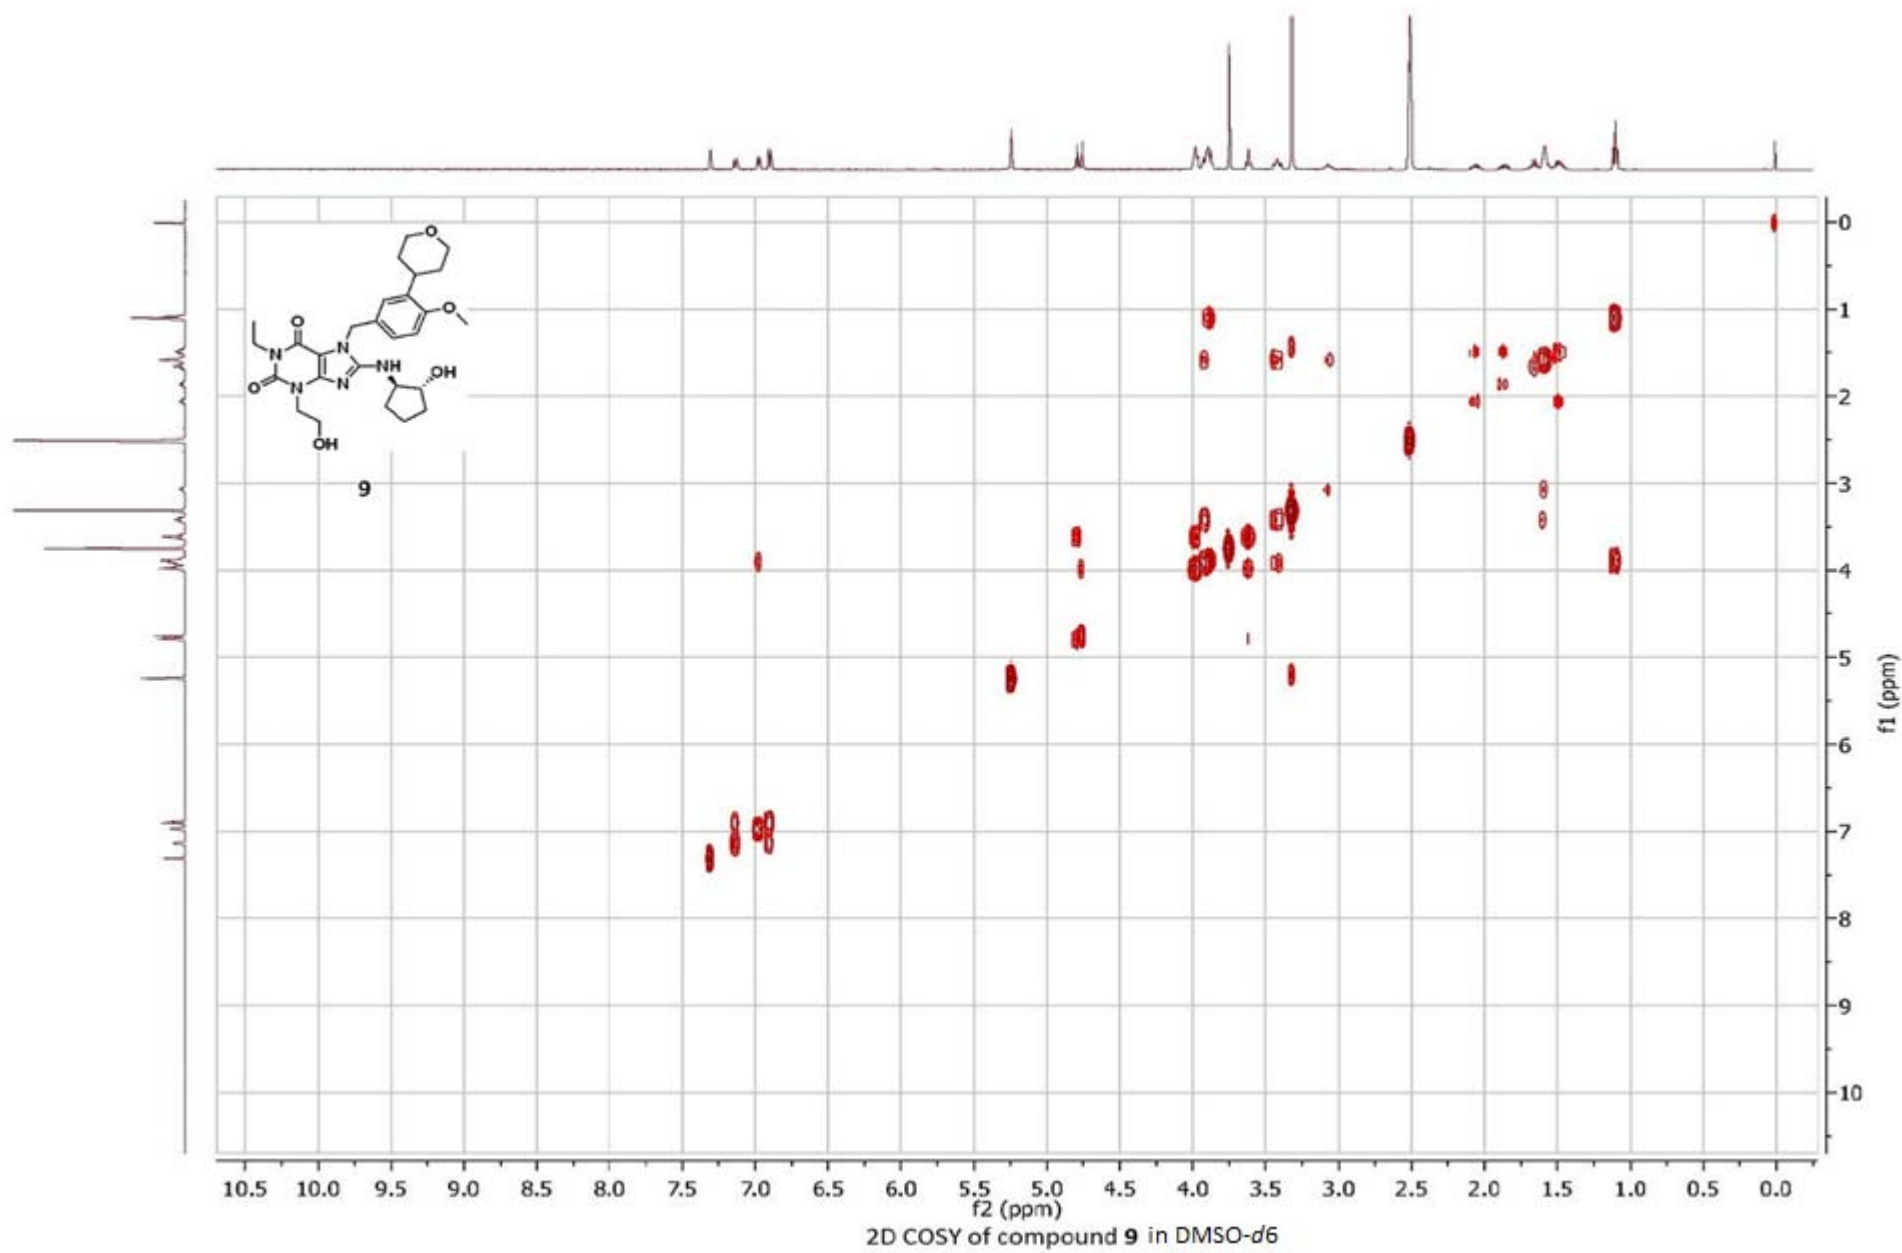

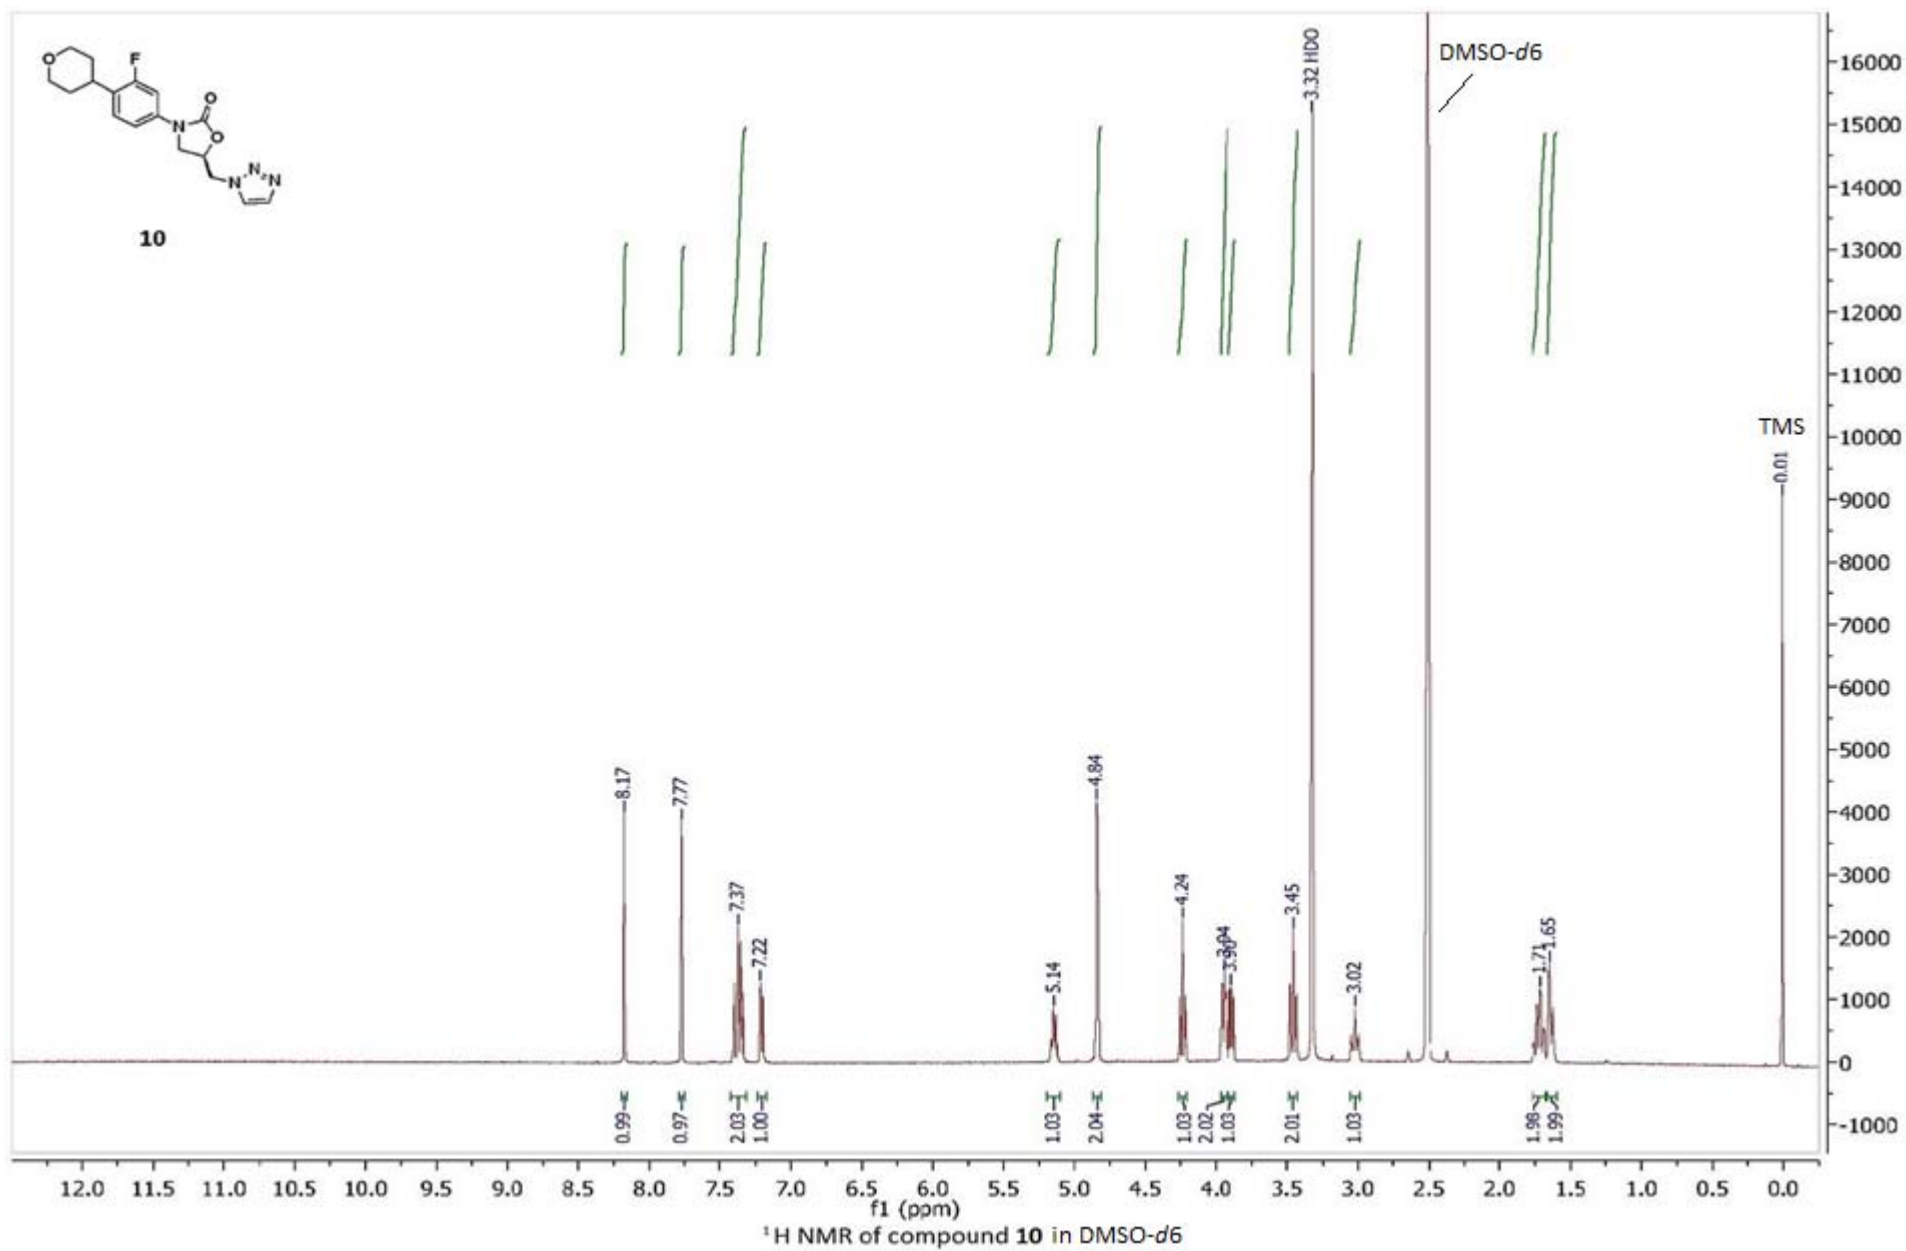



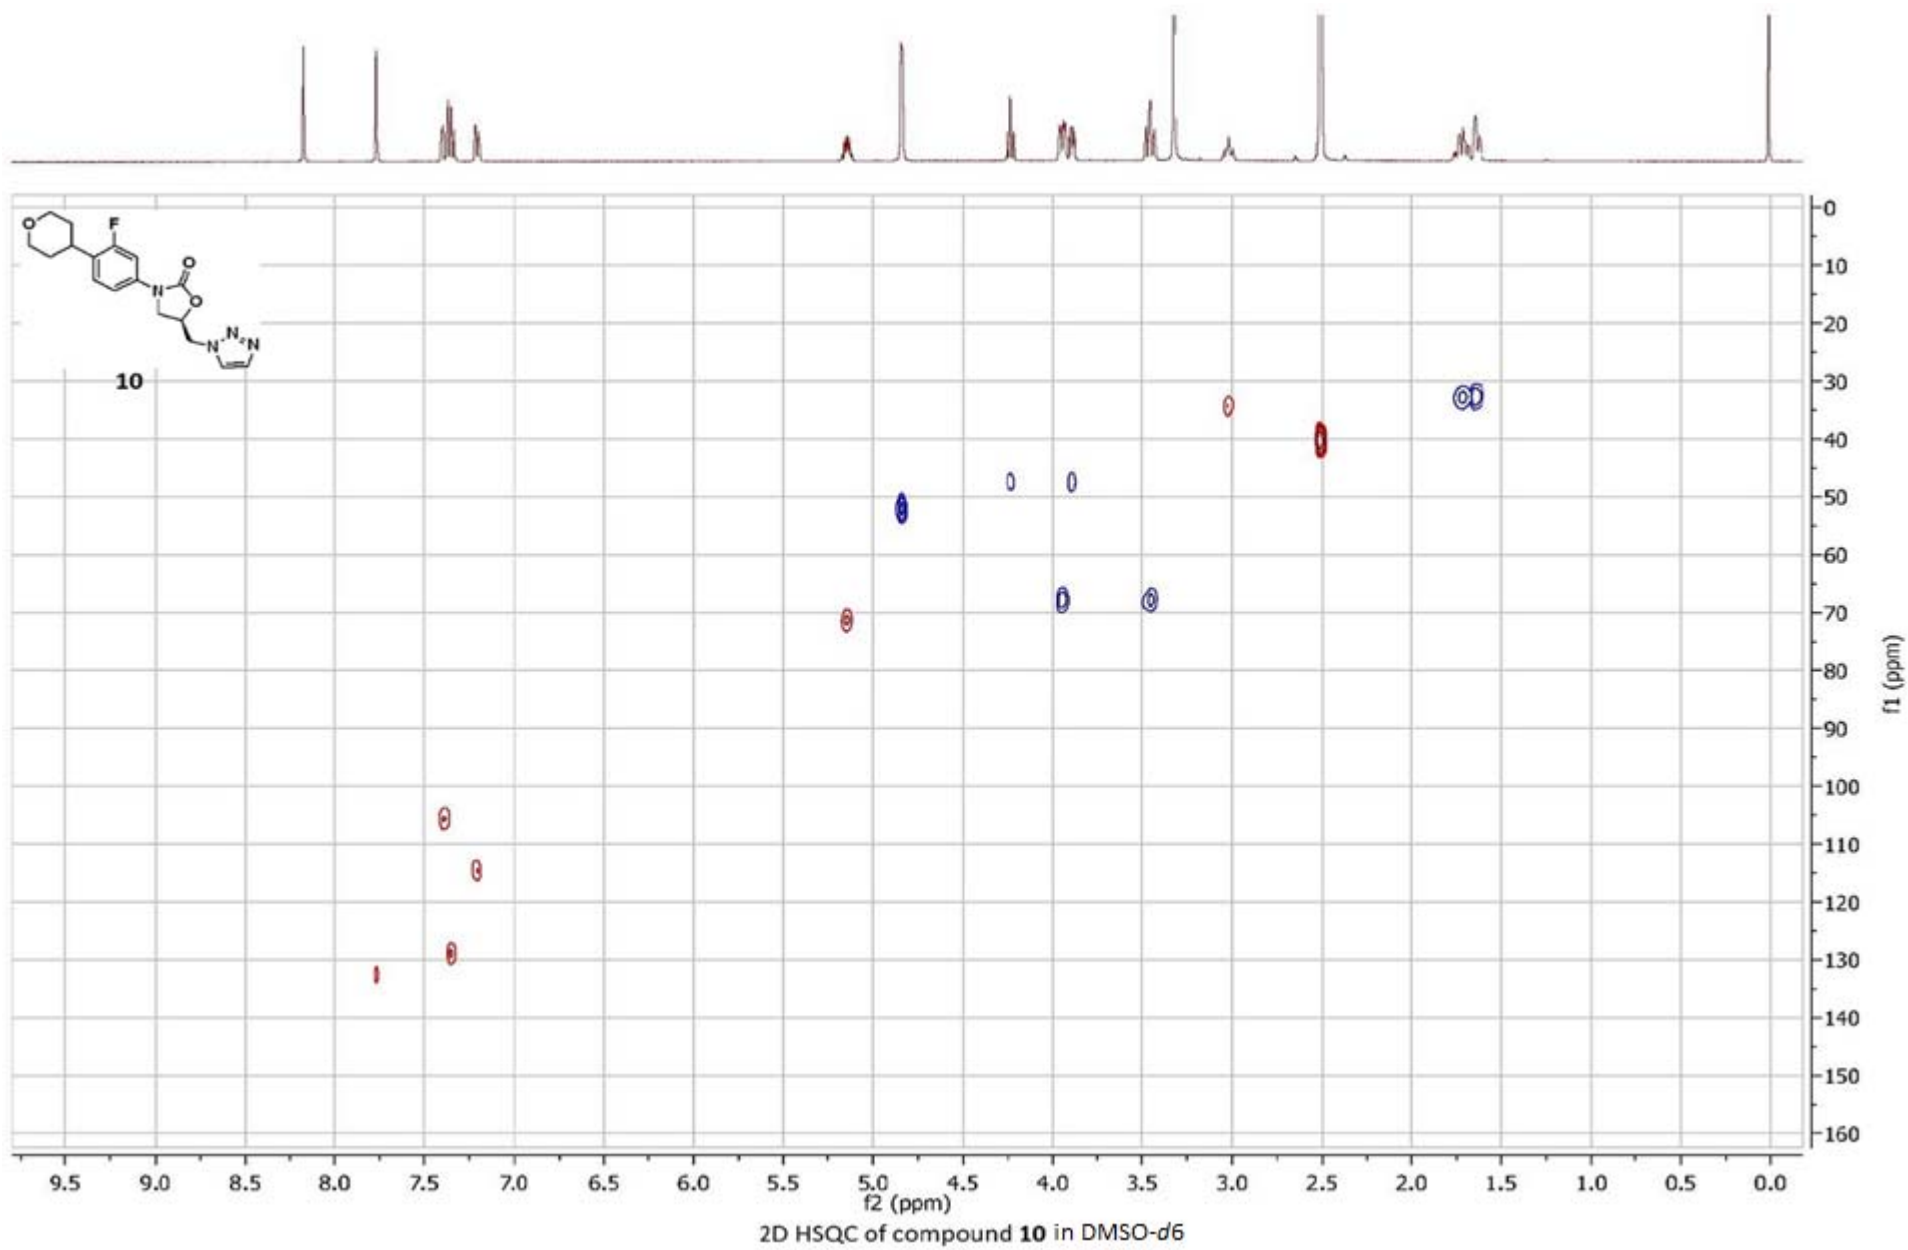



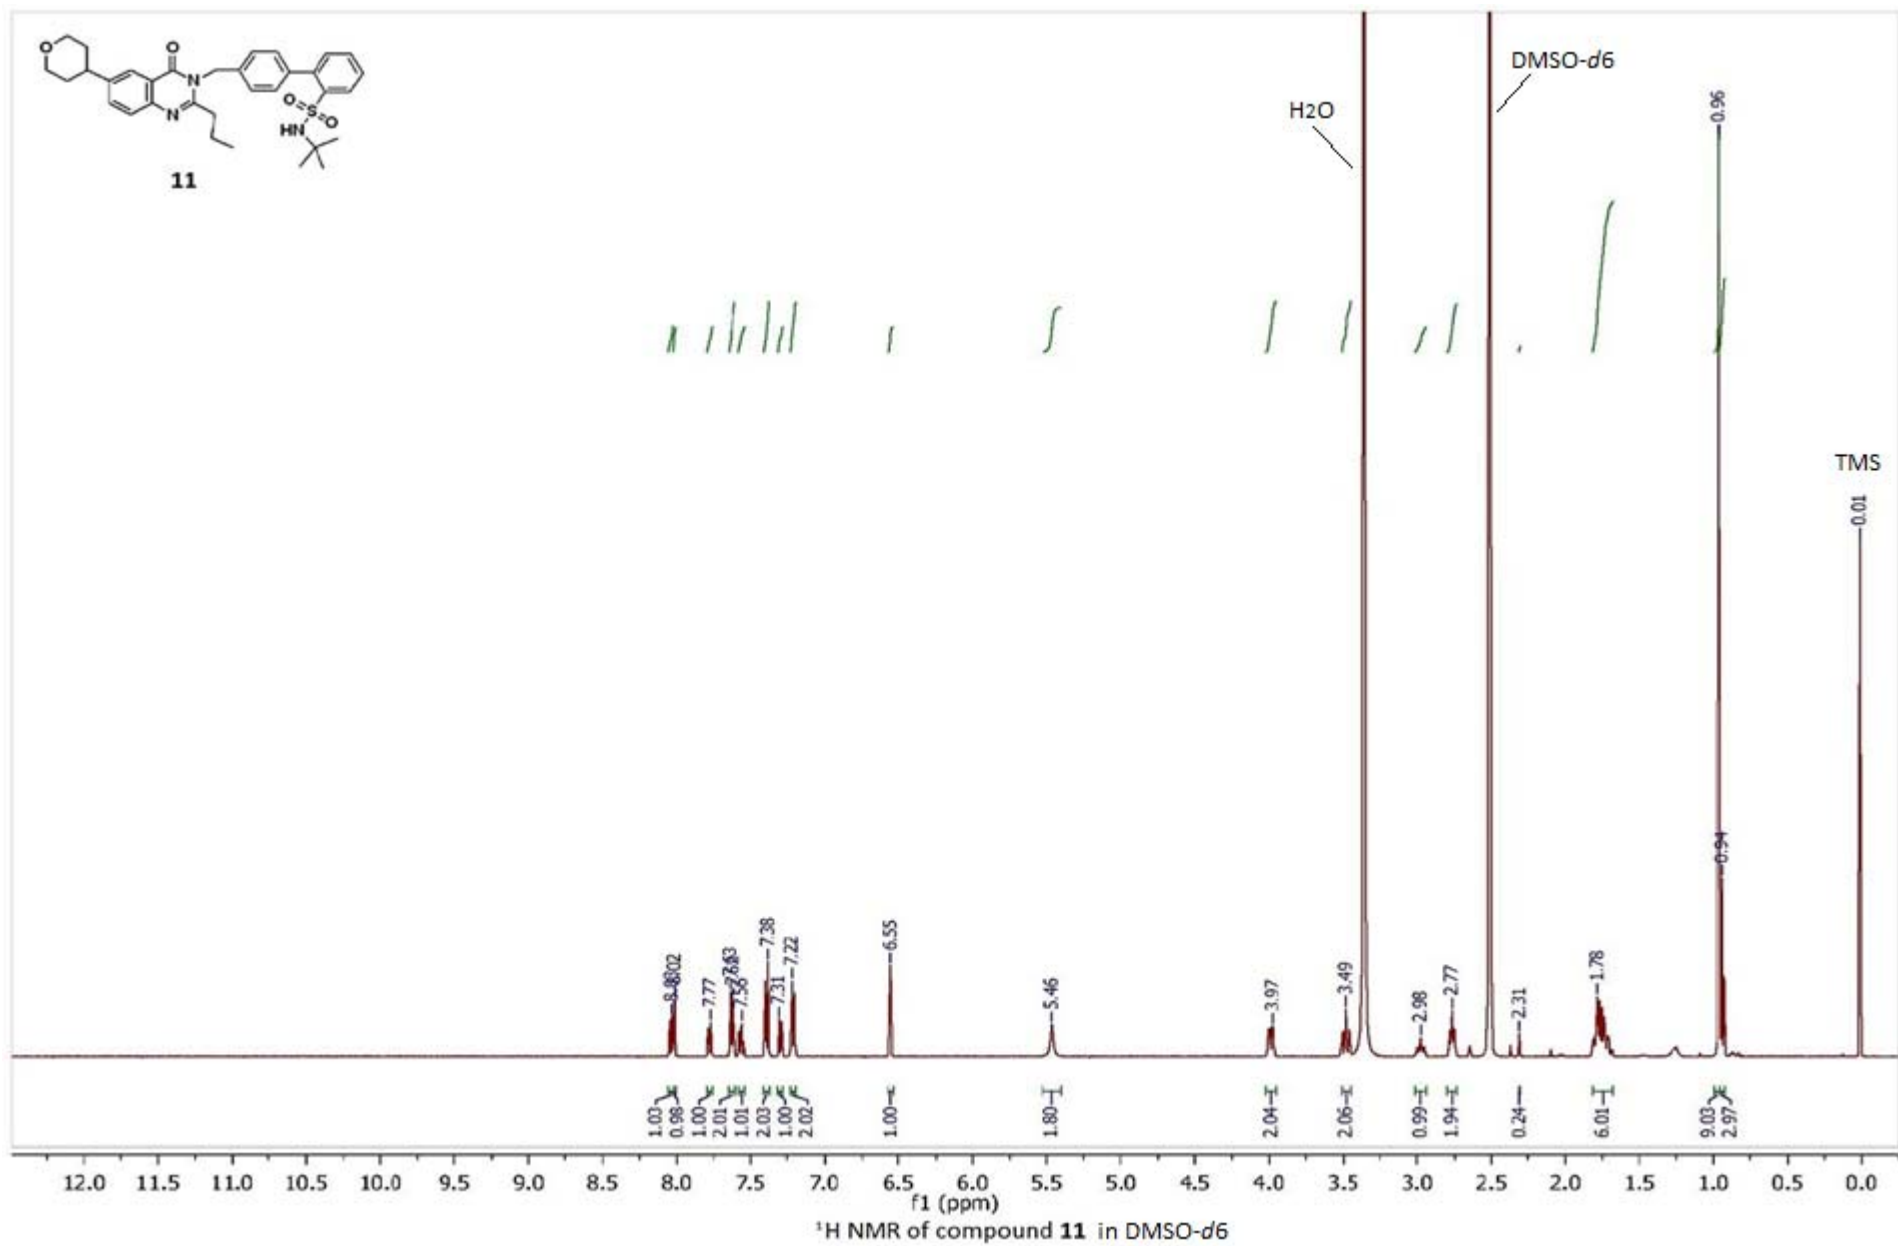

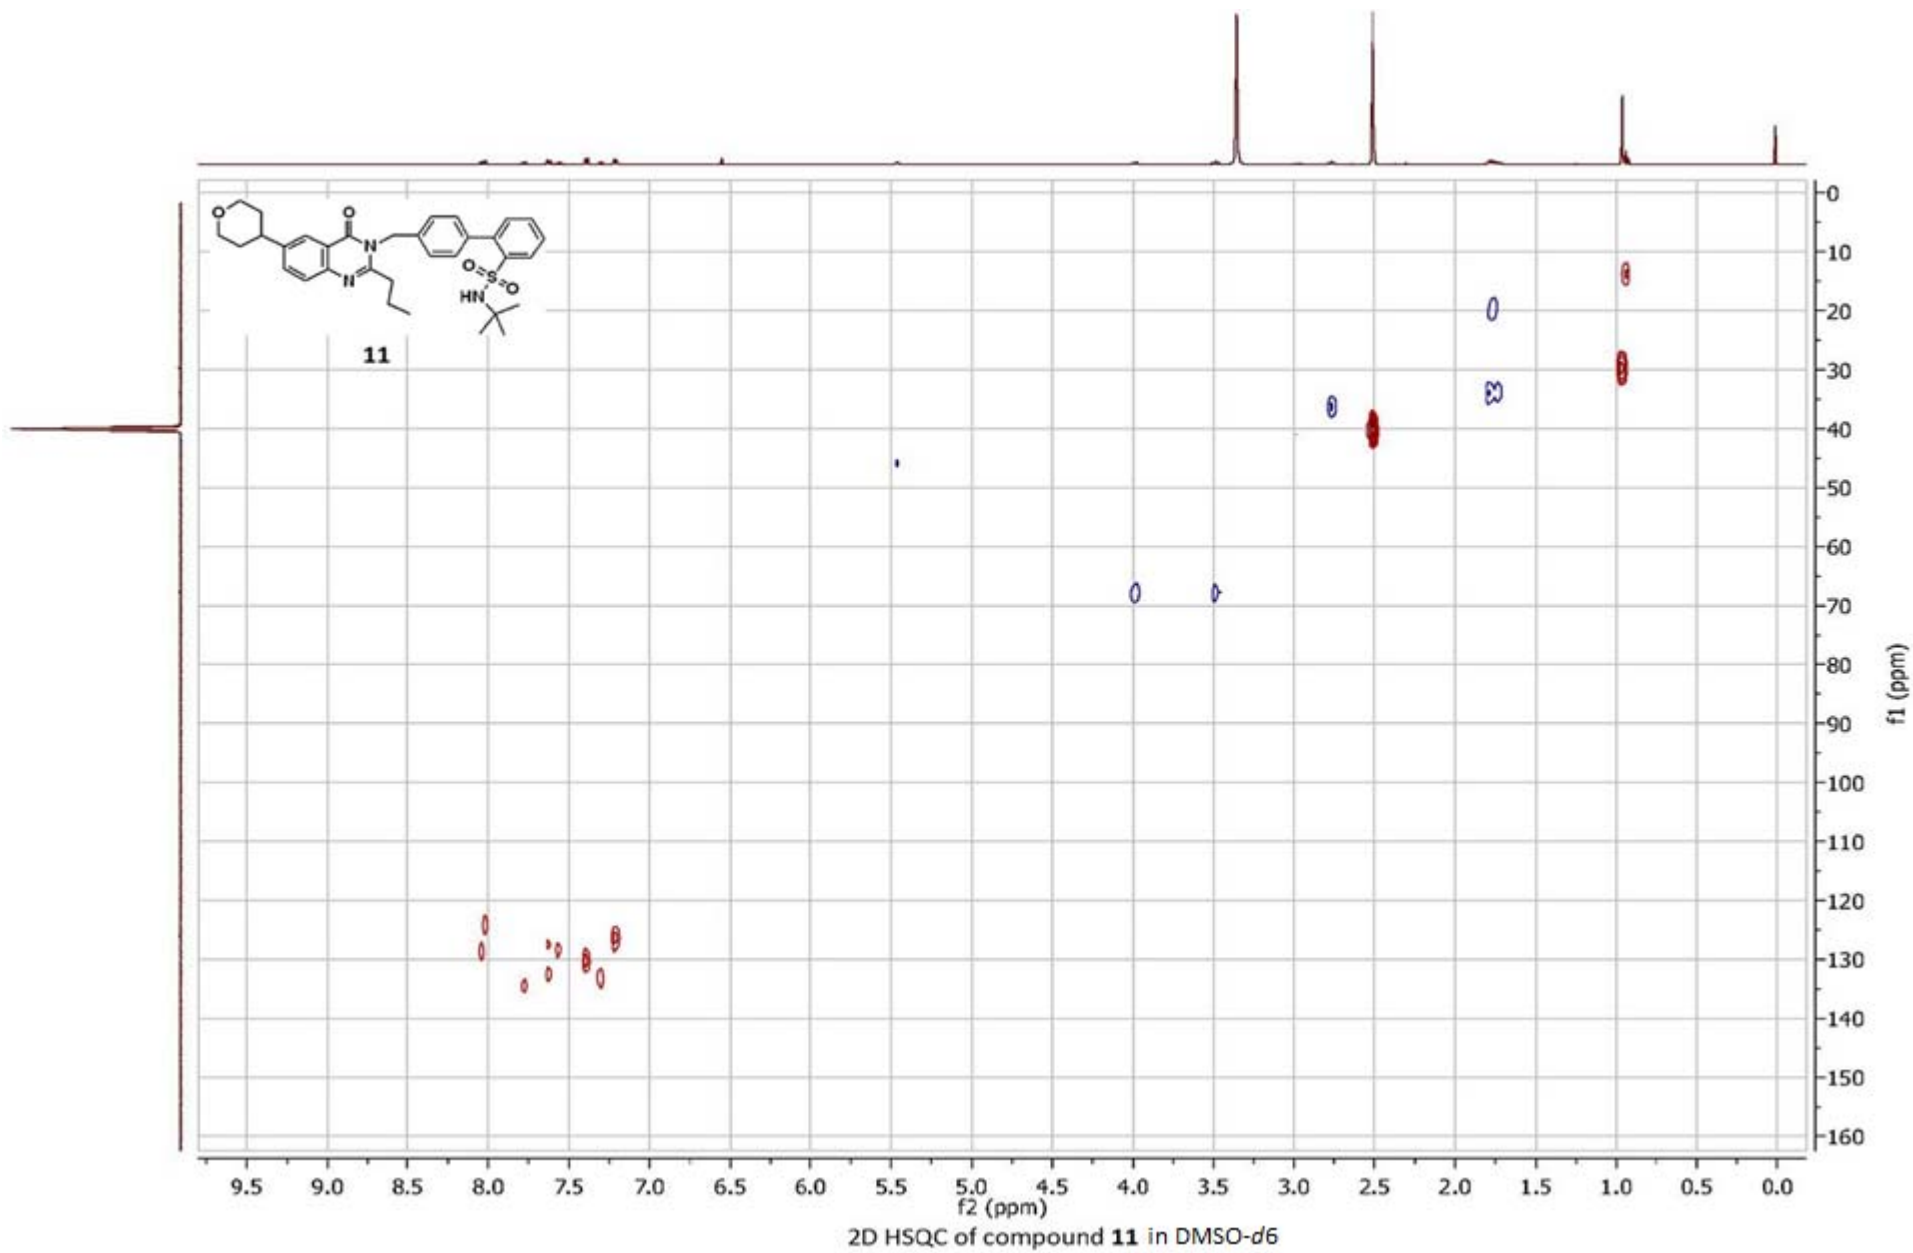

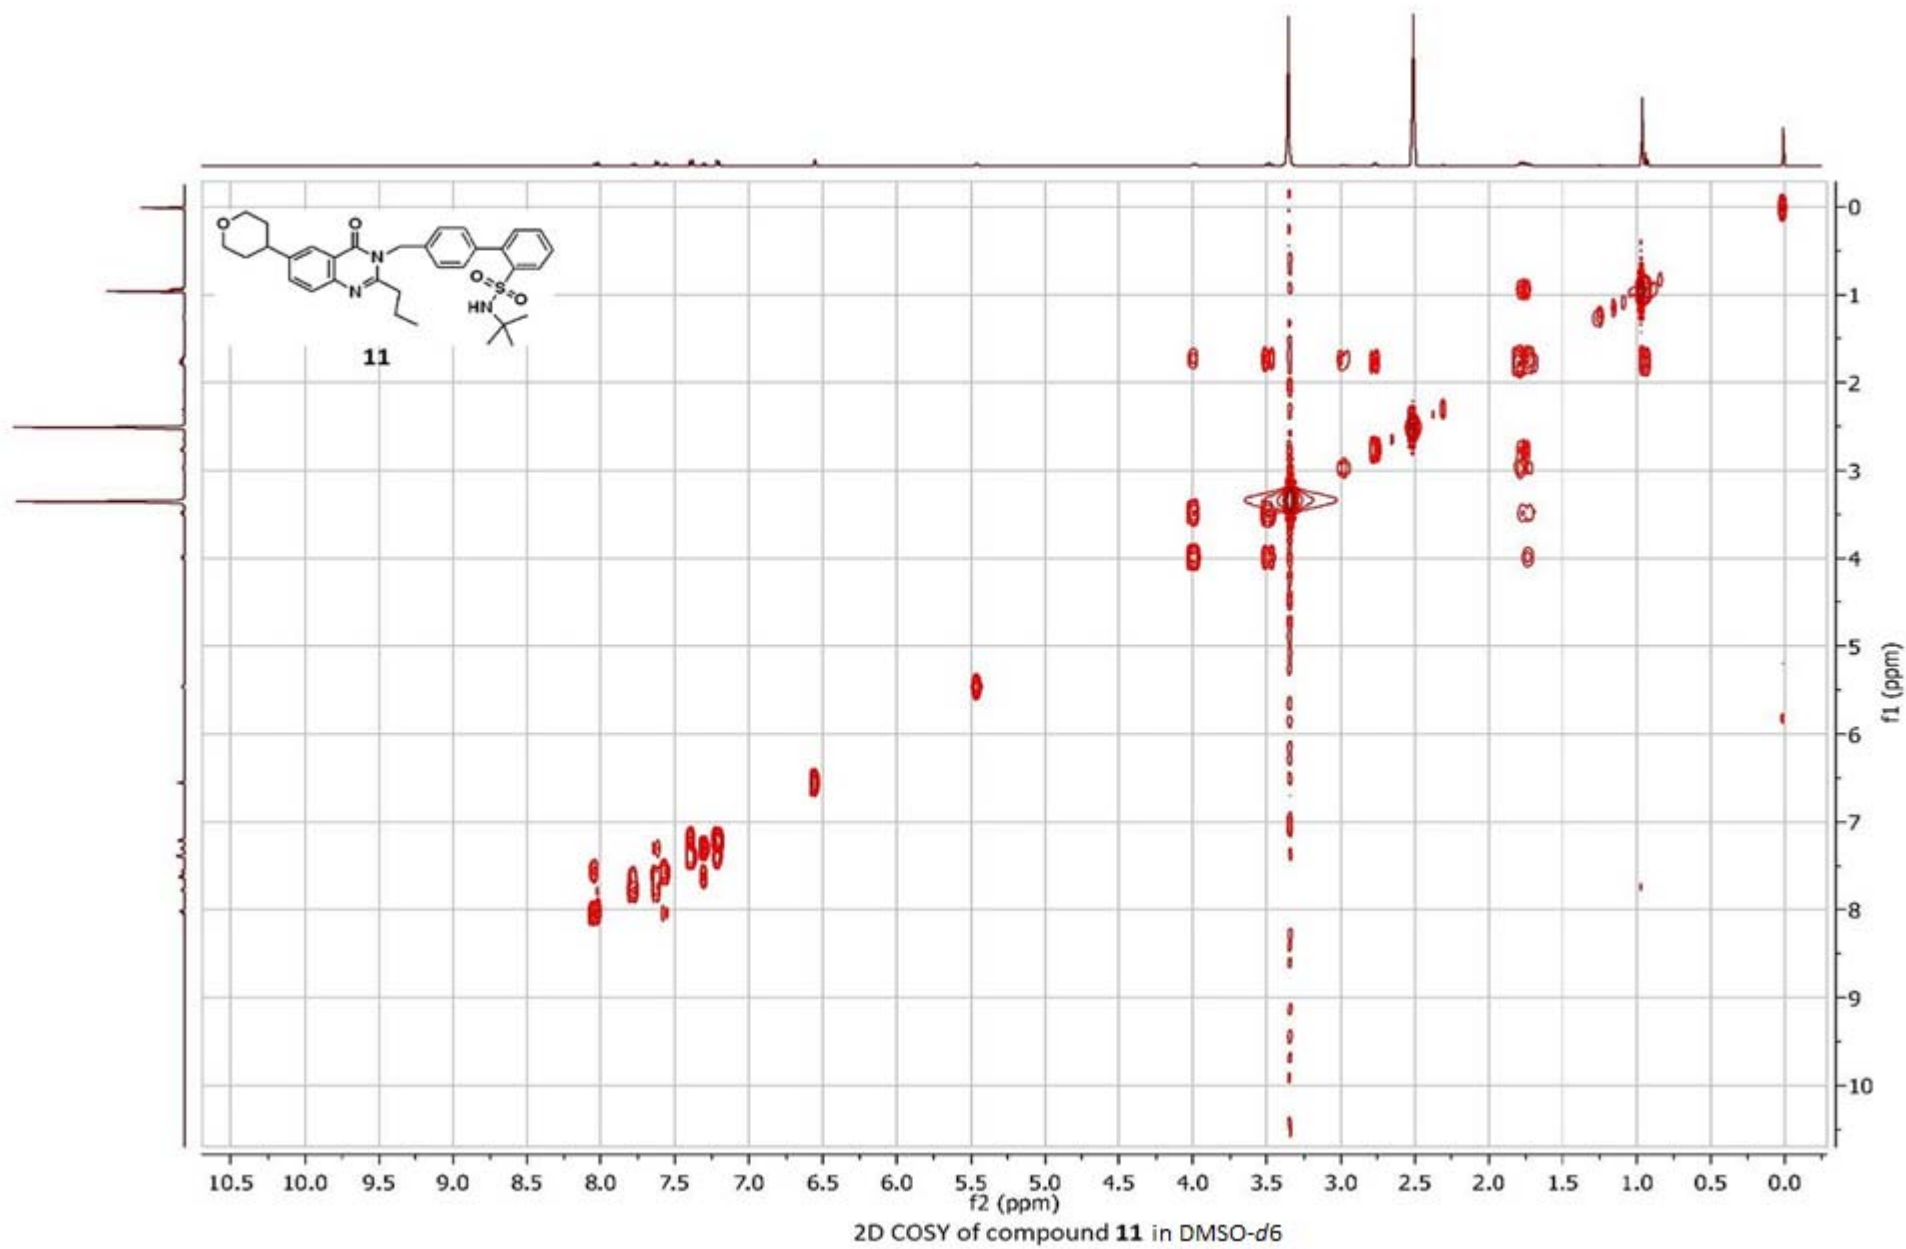

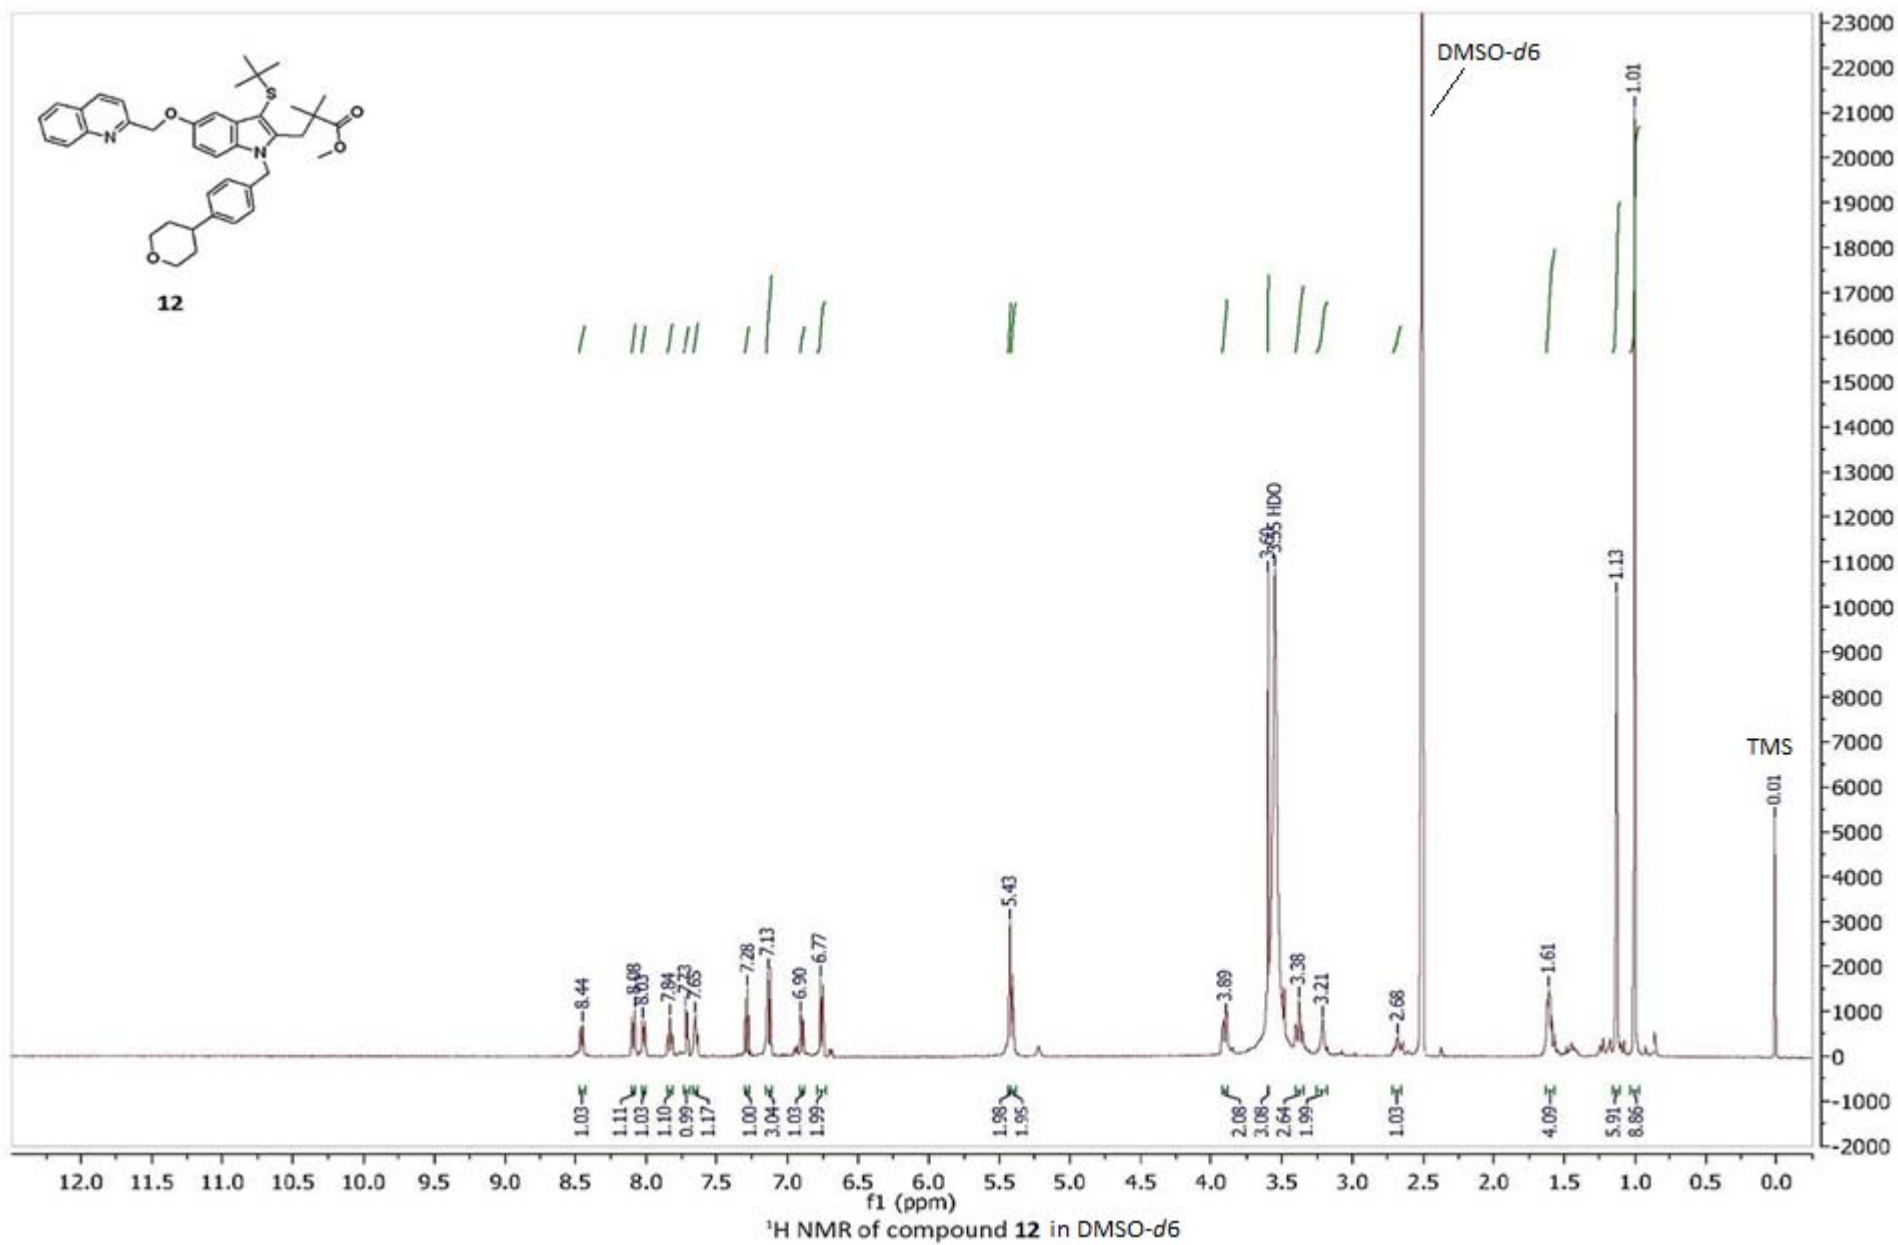

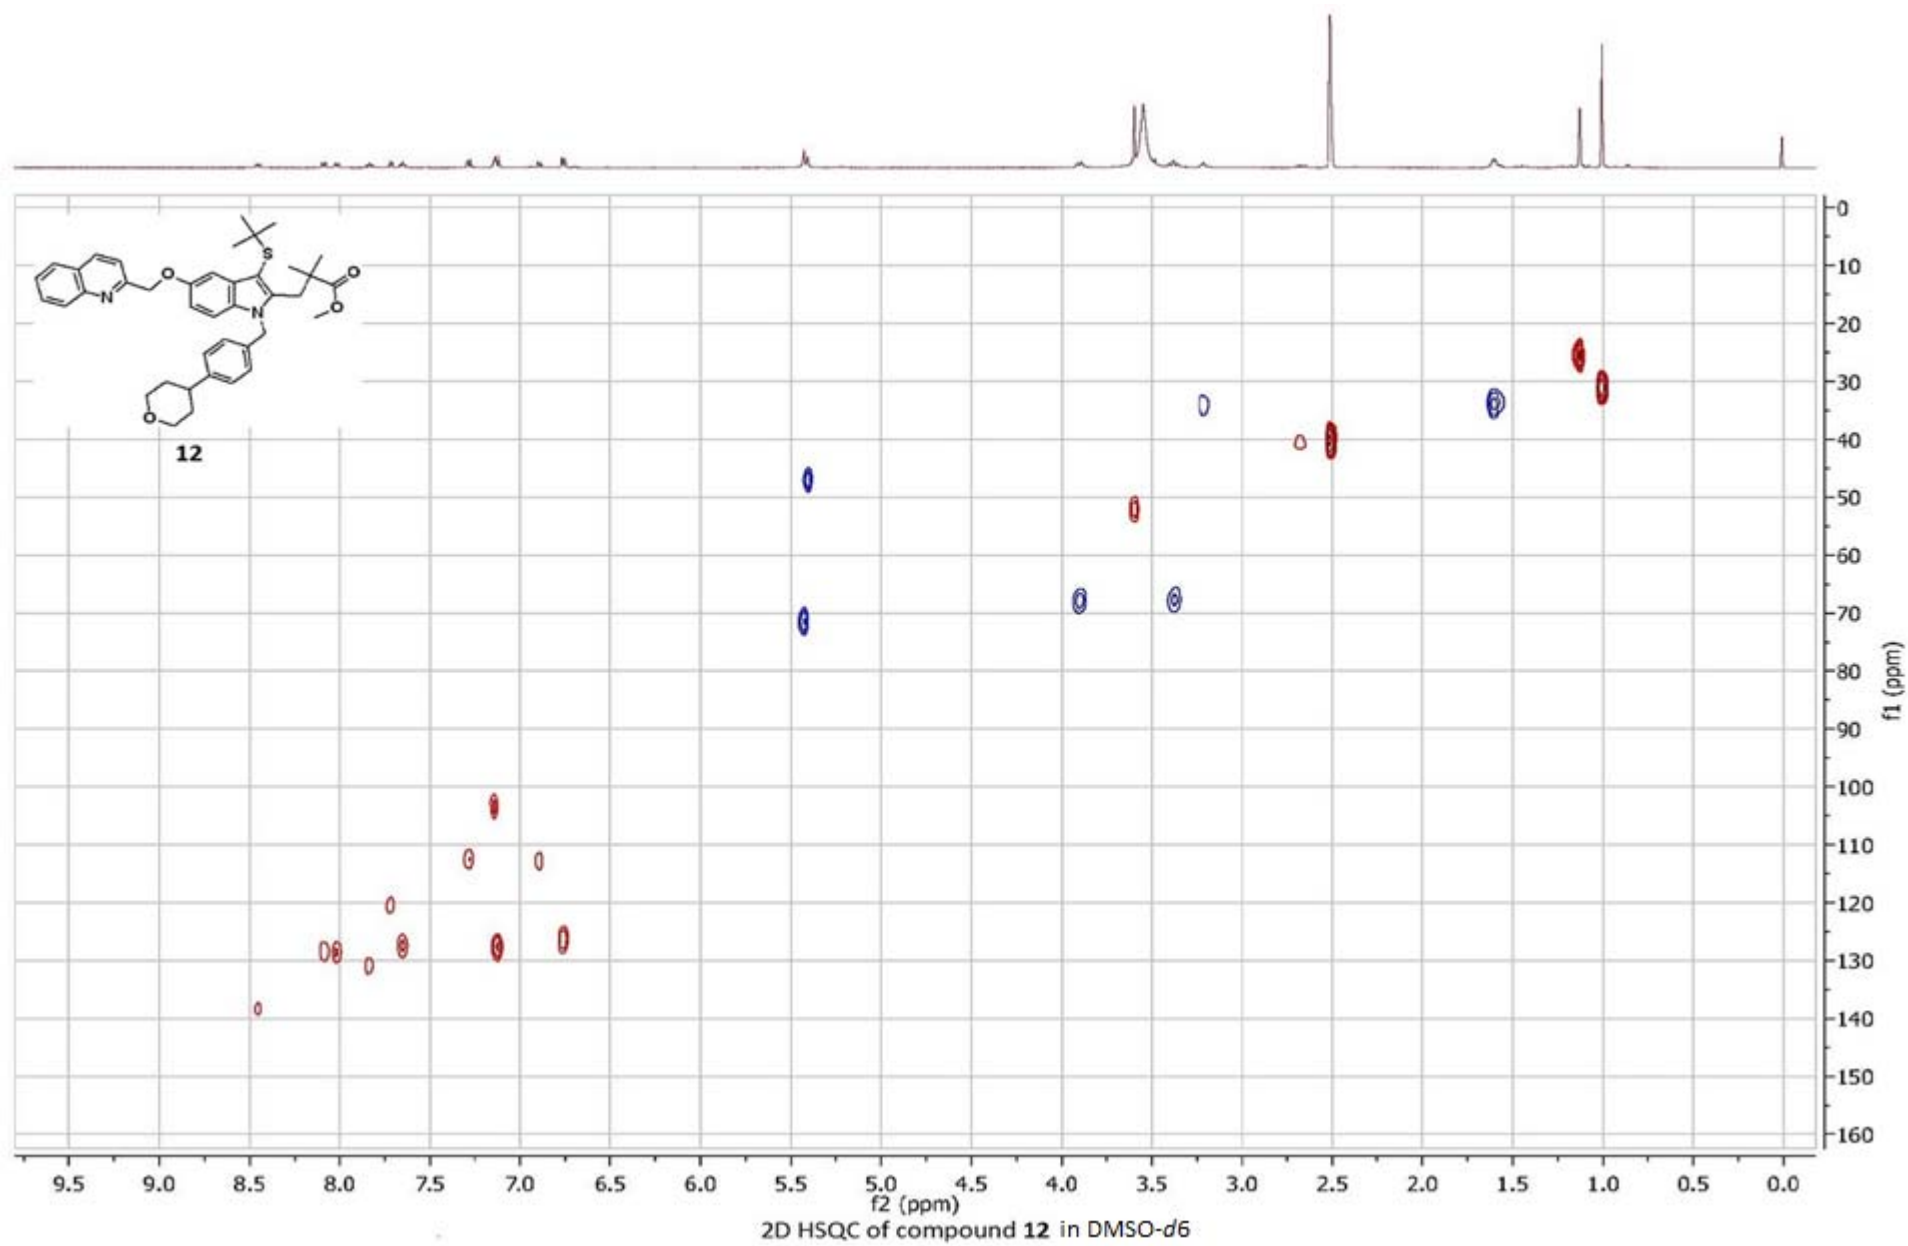

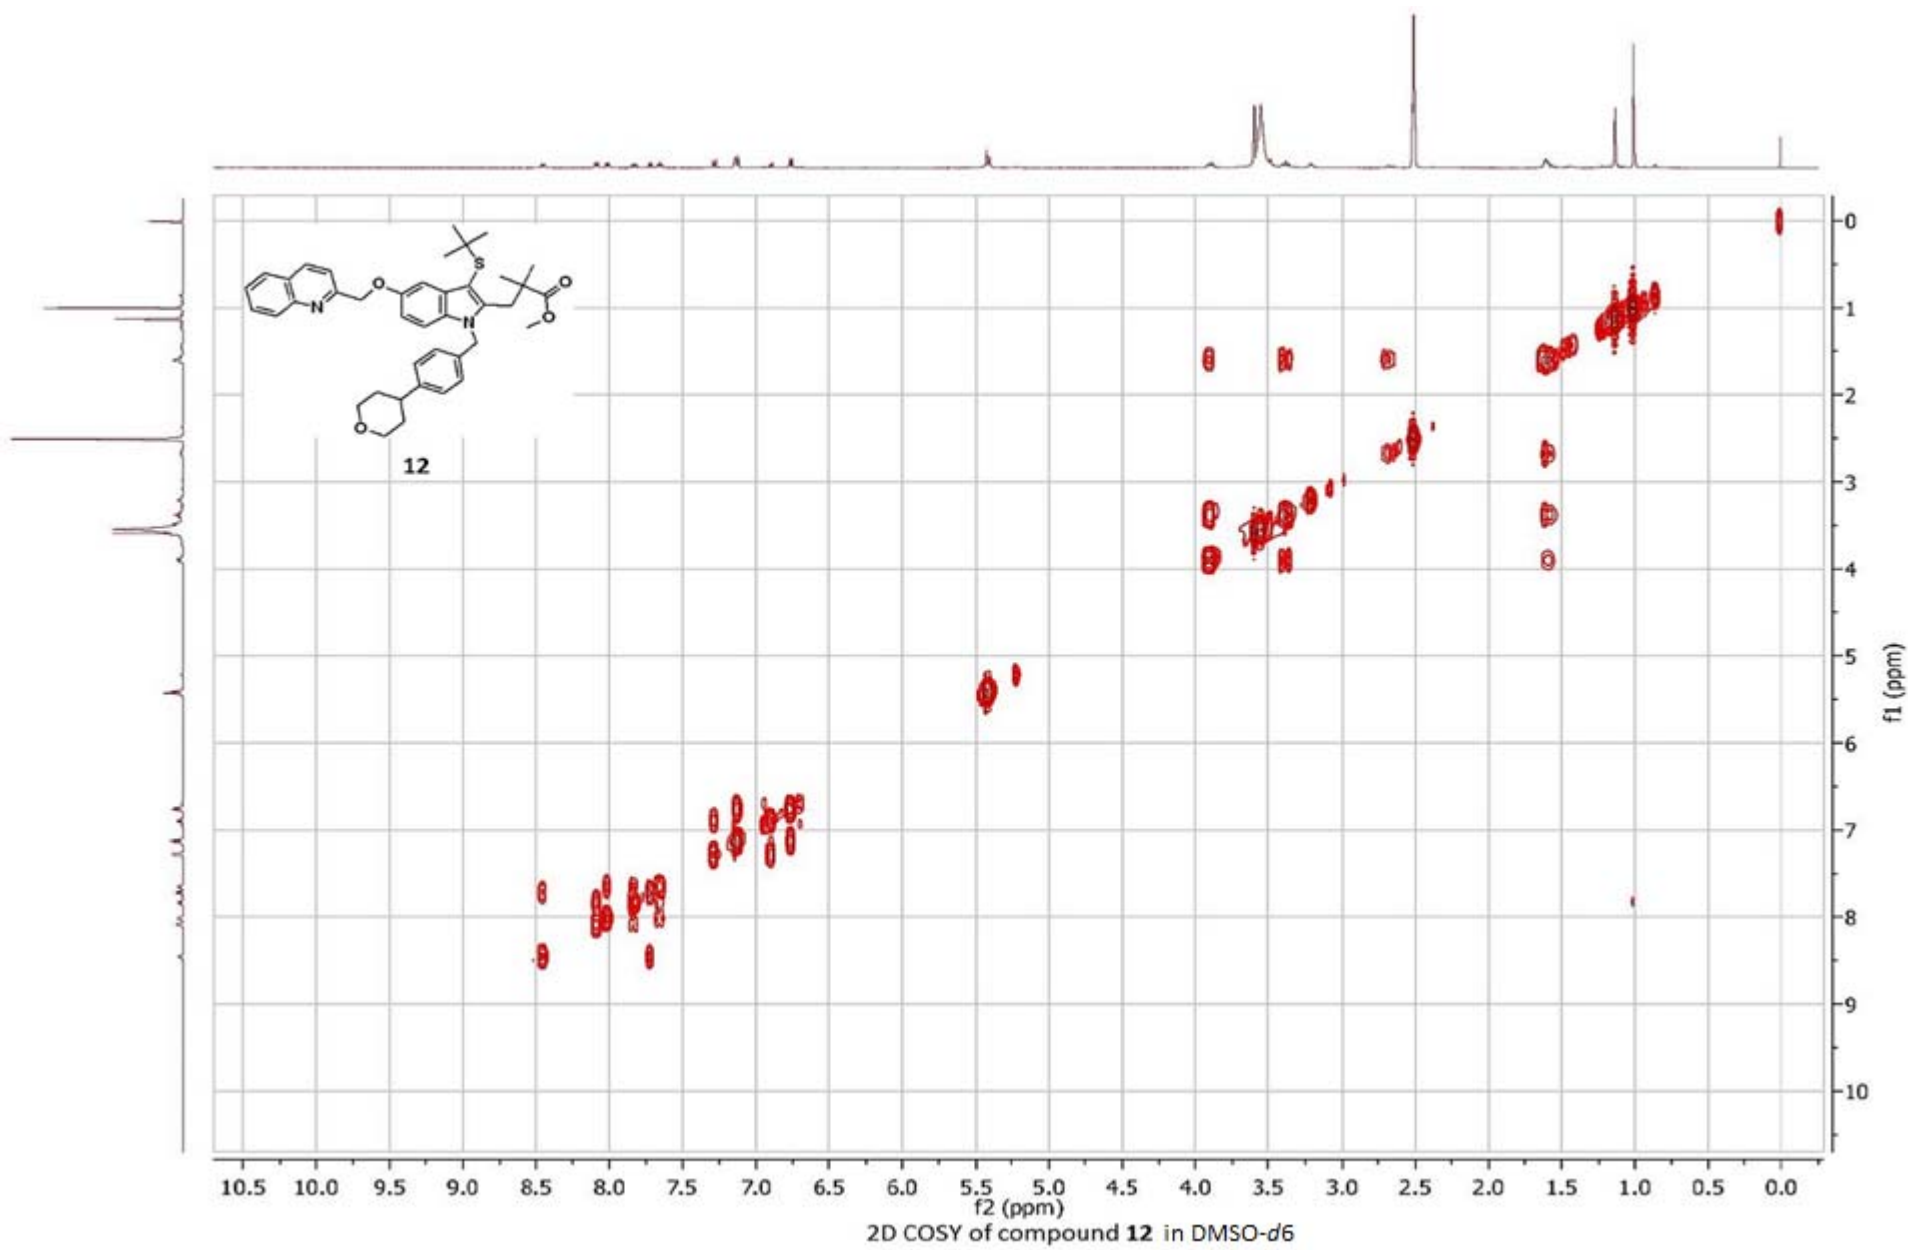



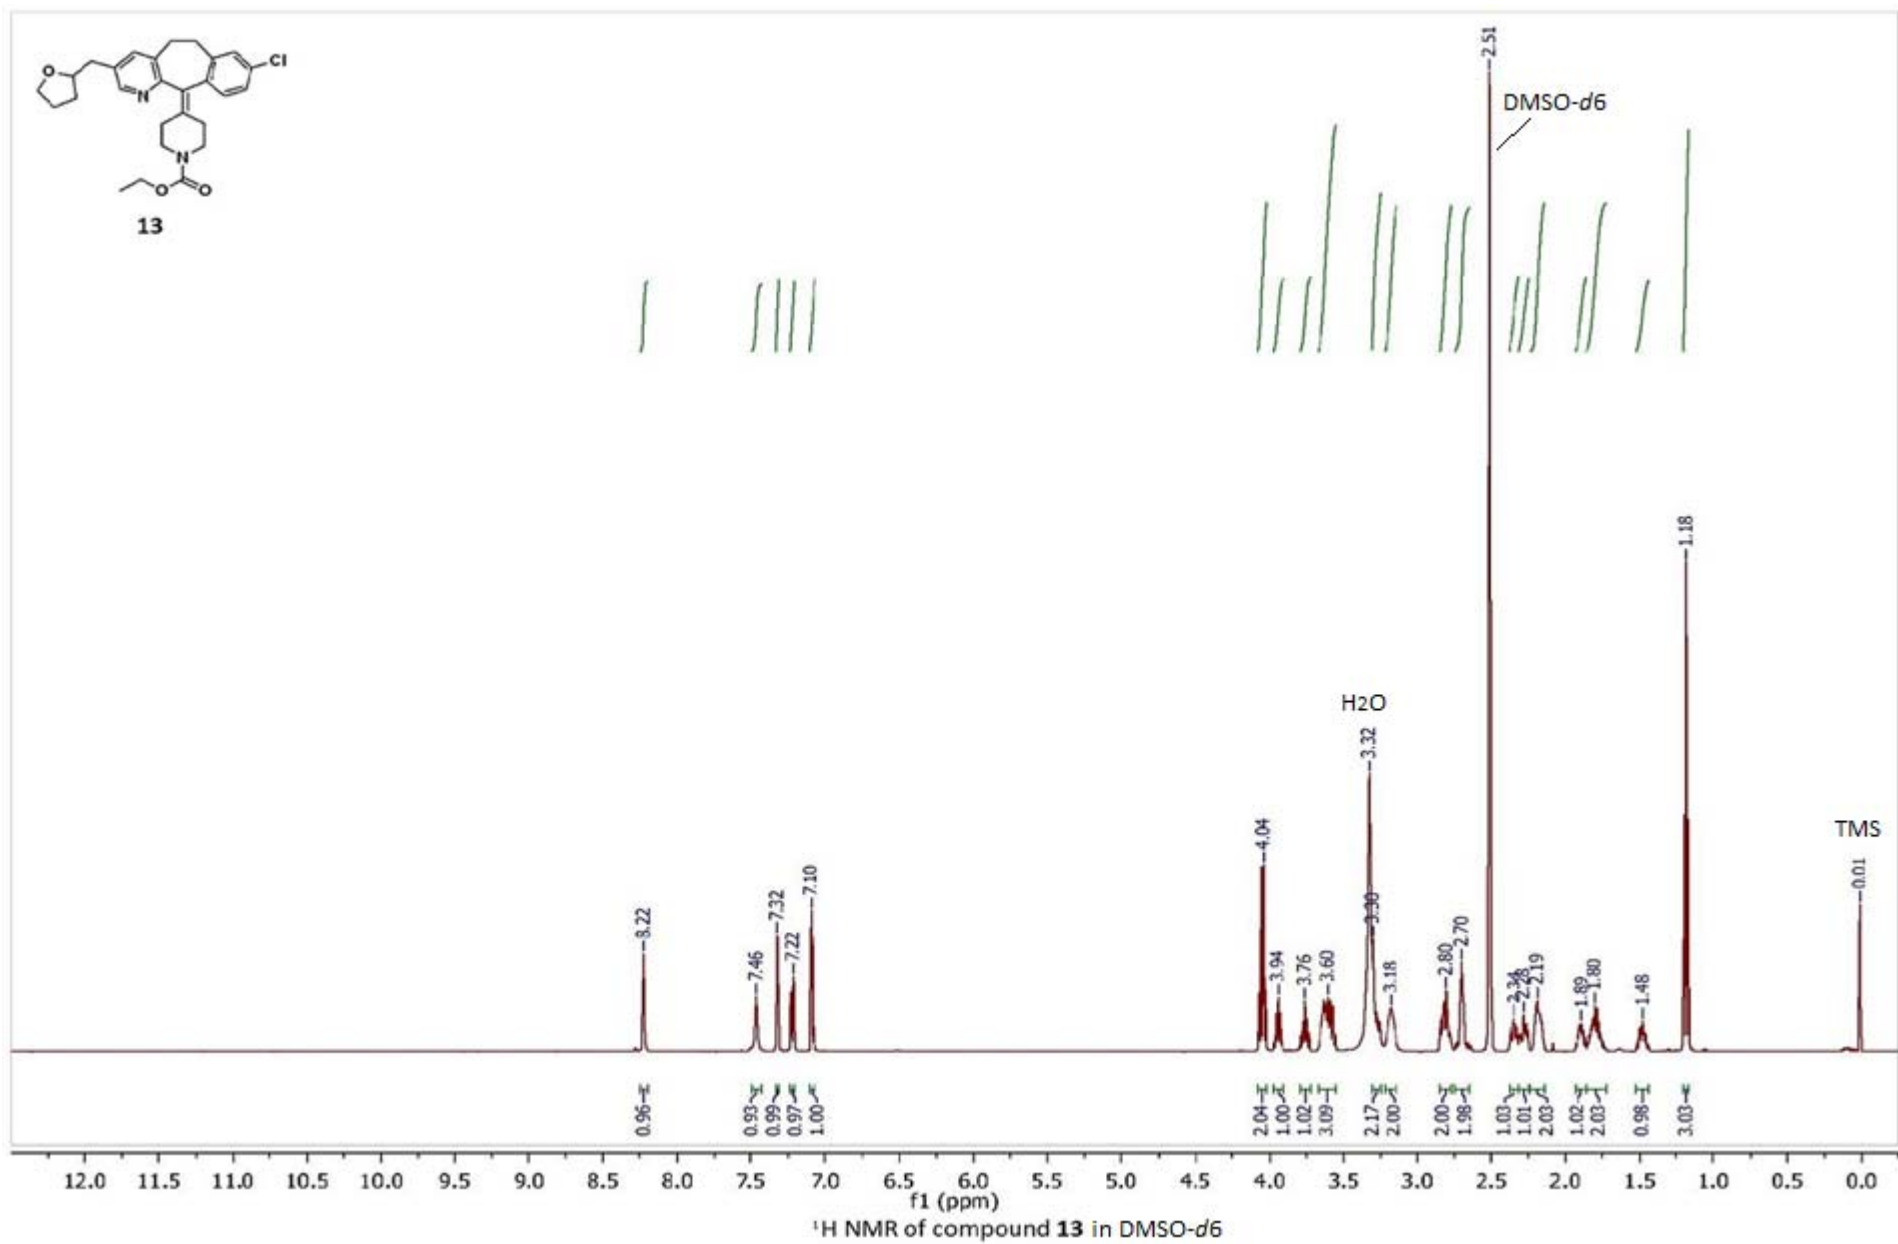

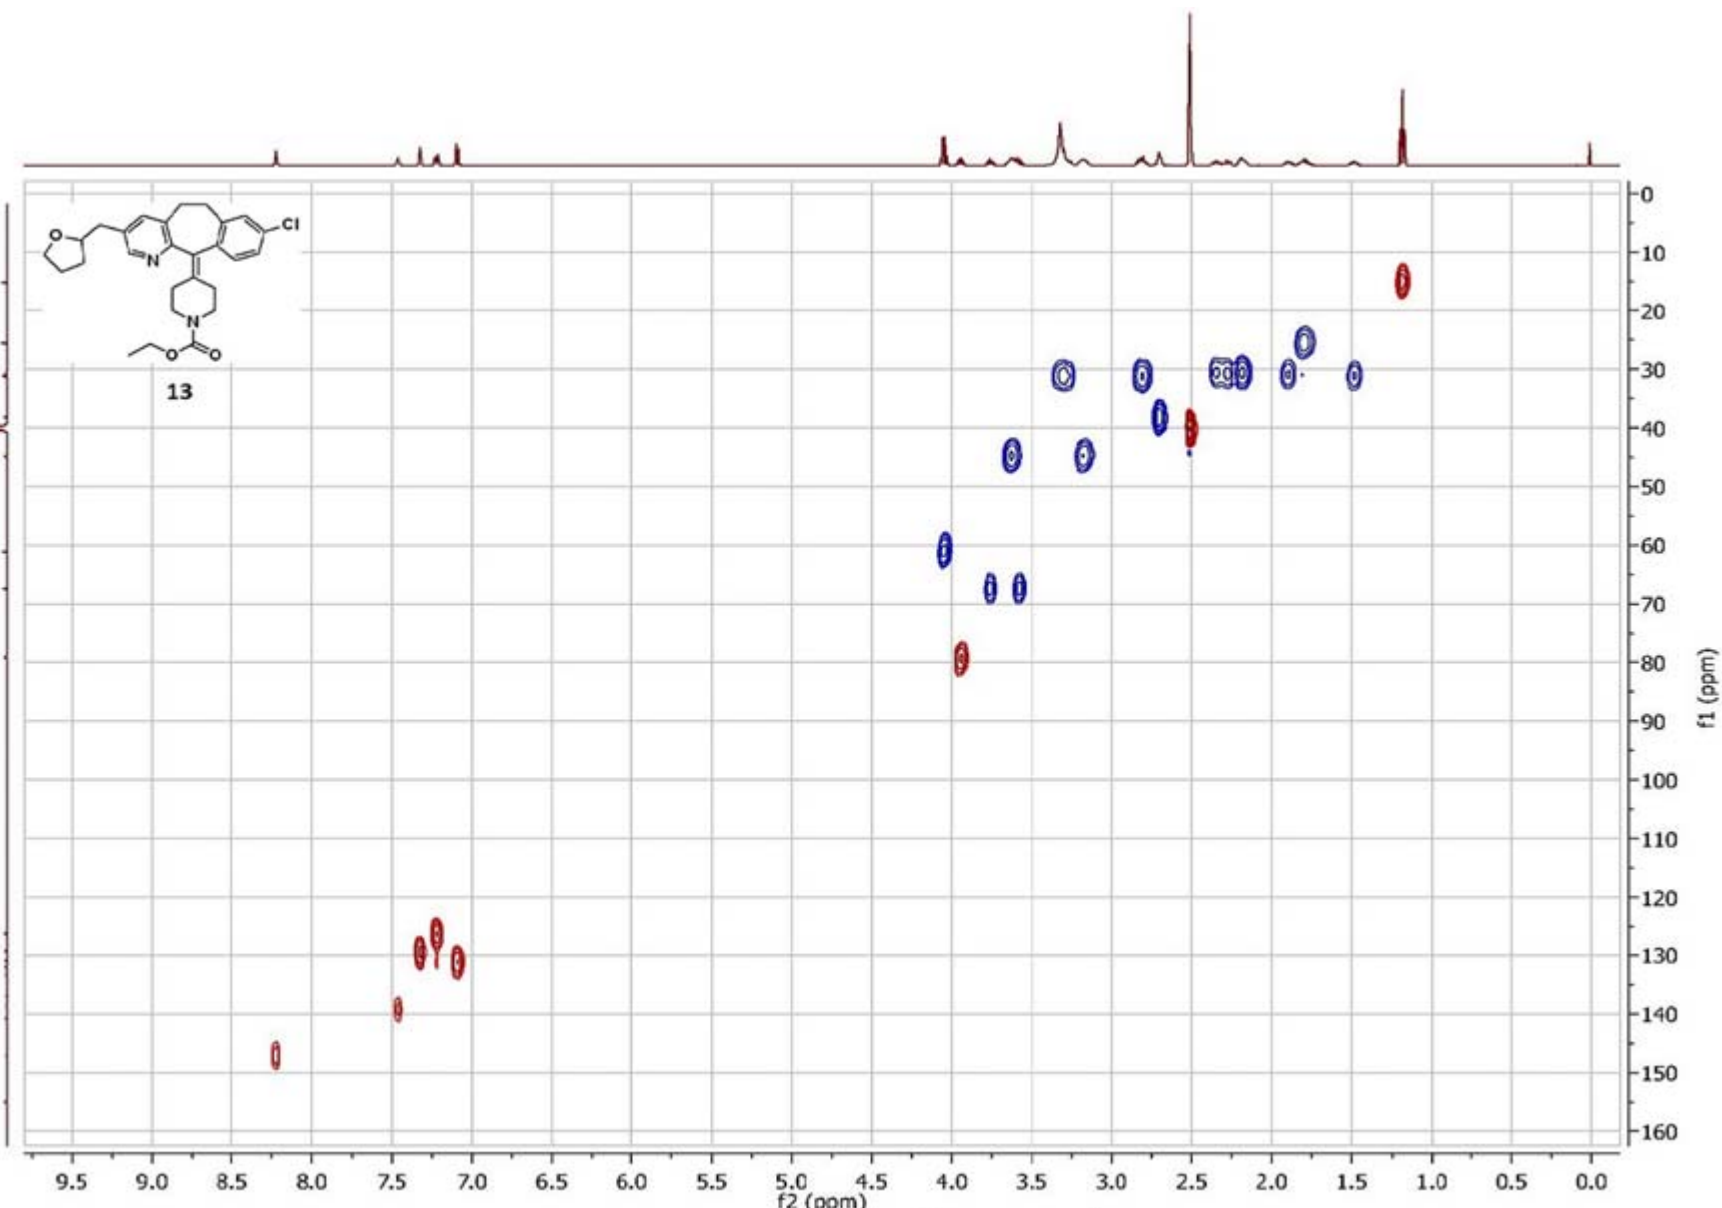

2D HSQC of compound **13** in DMSO- $d_6$

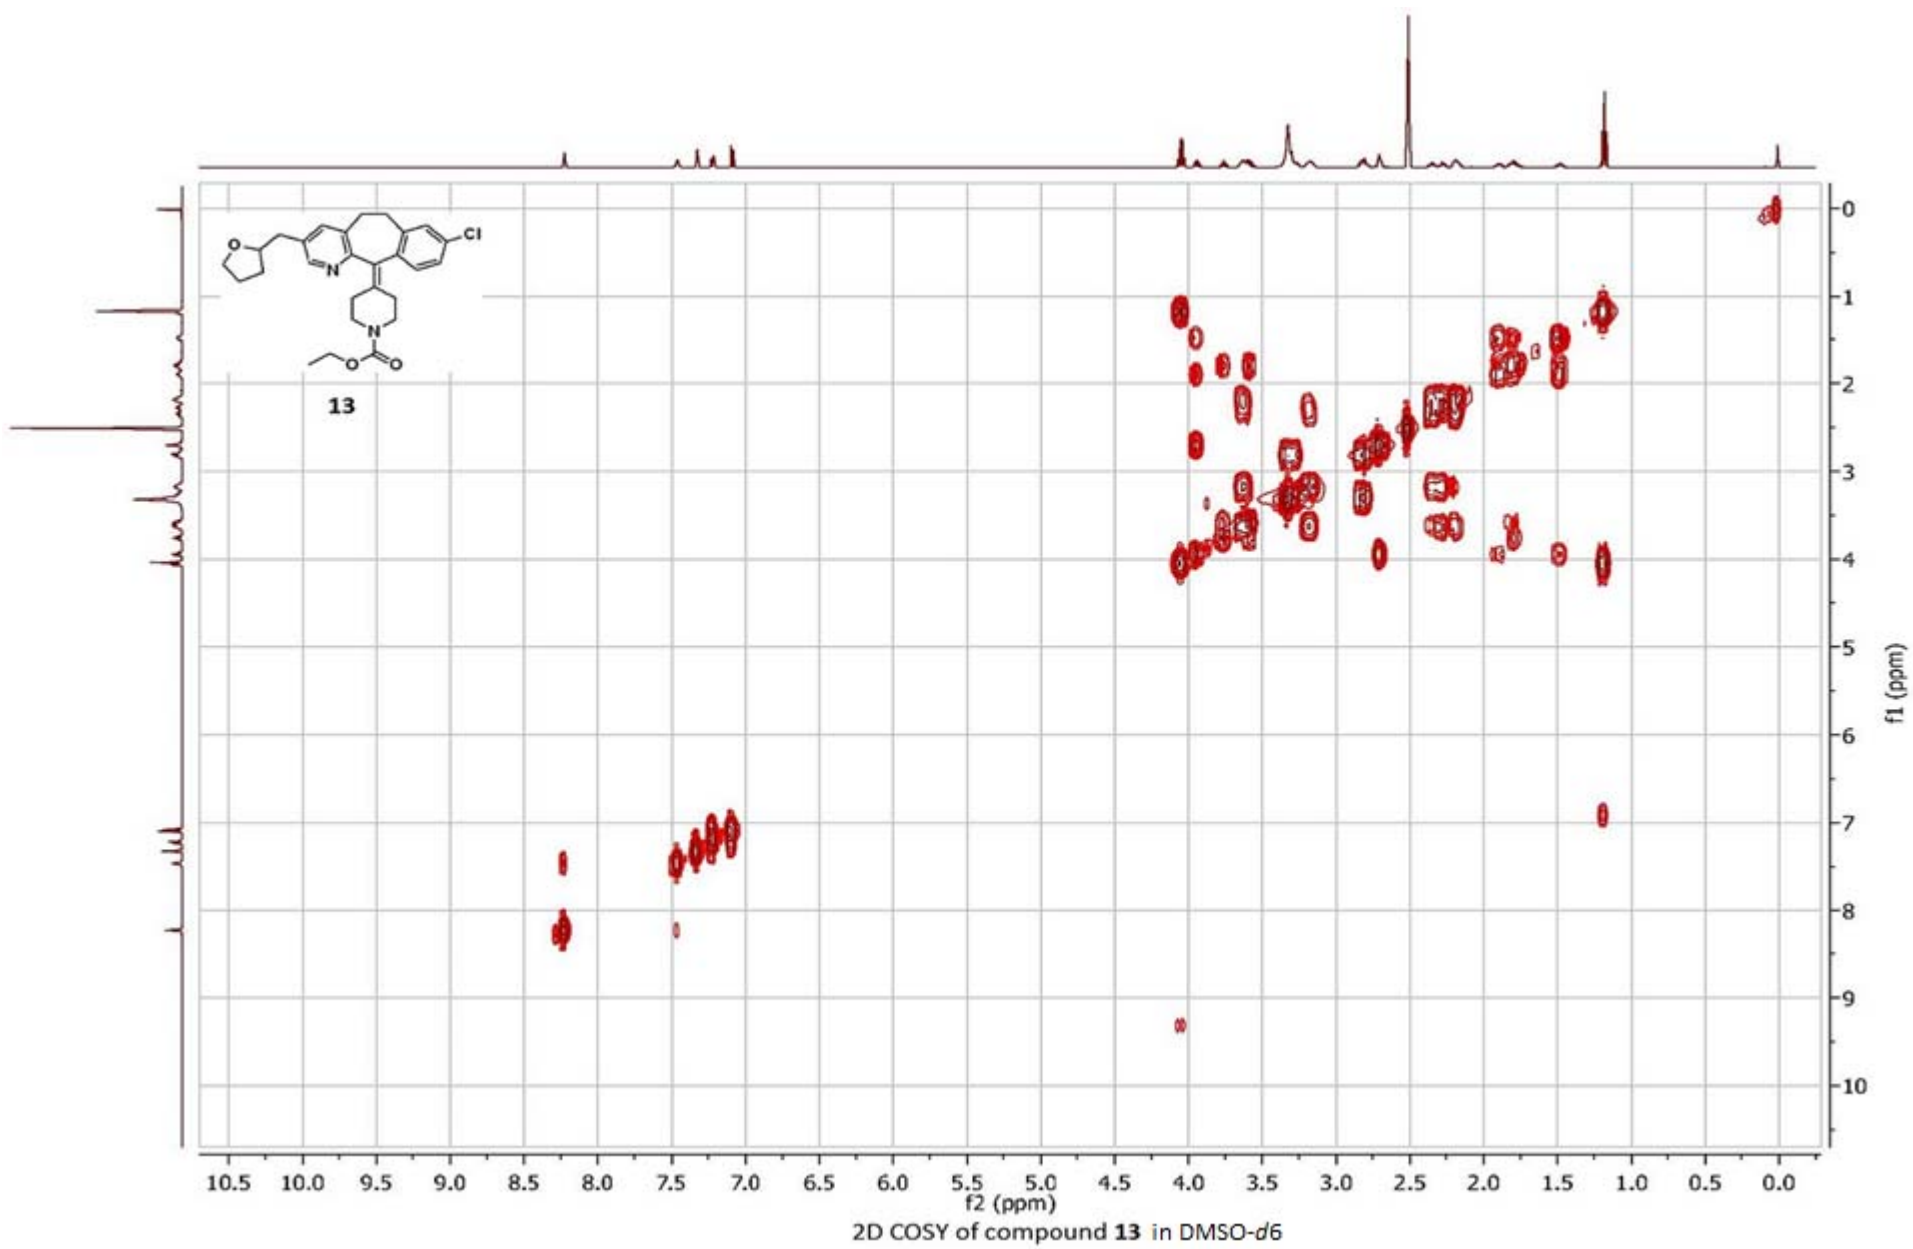

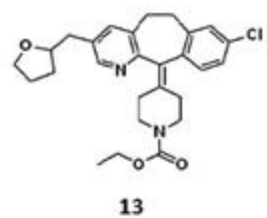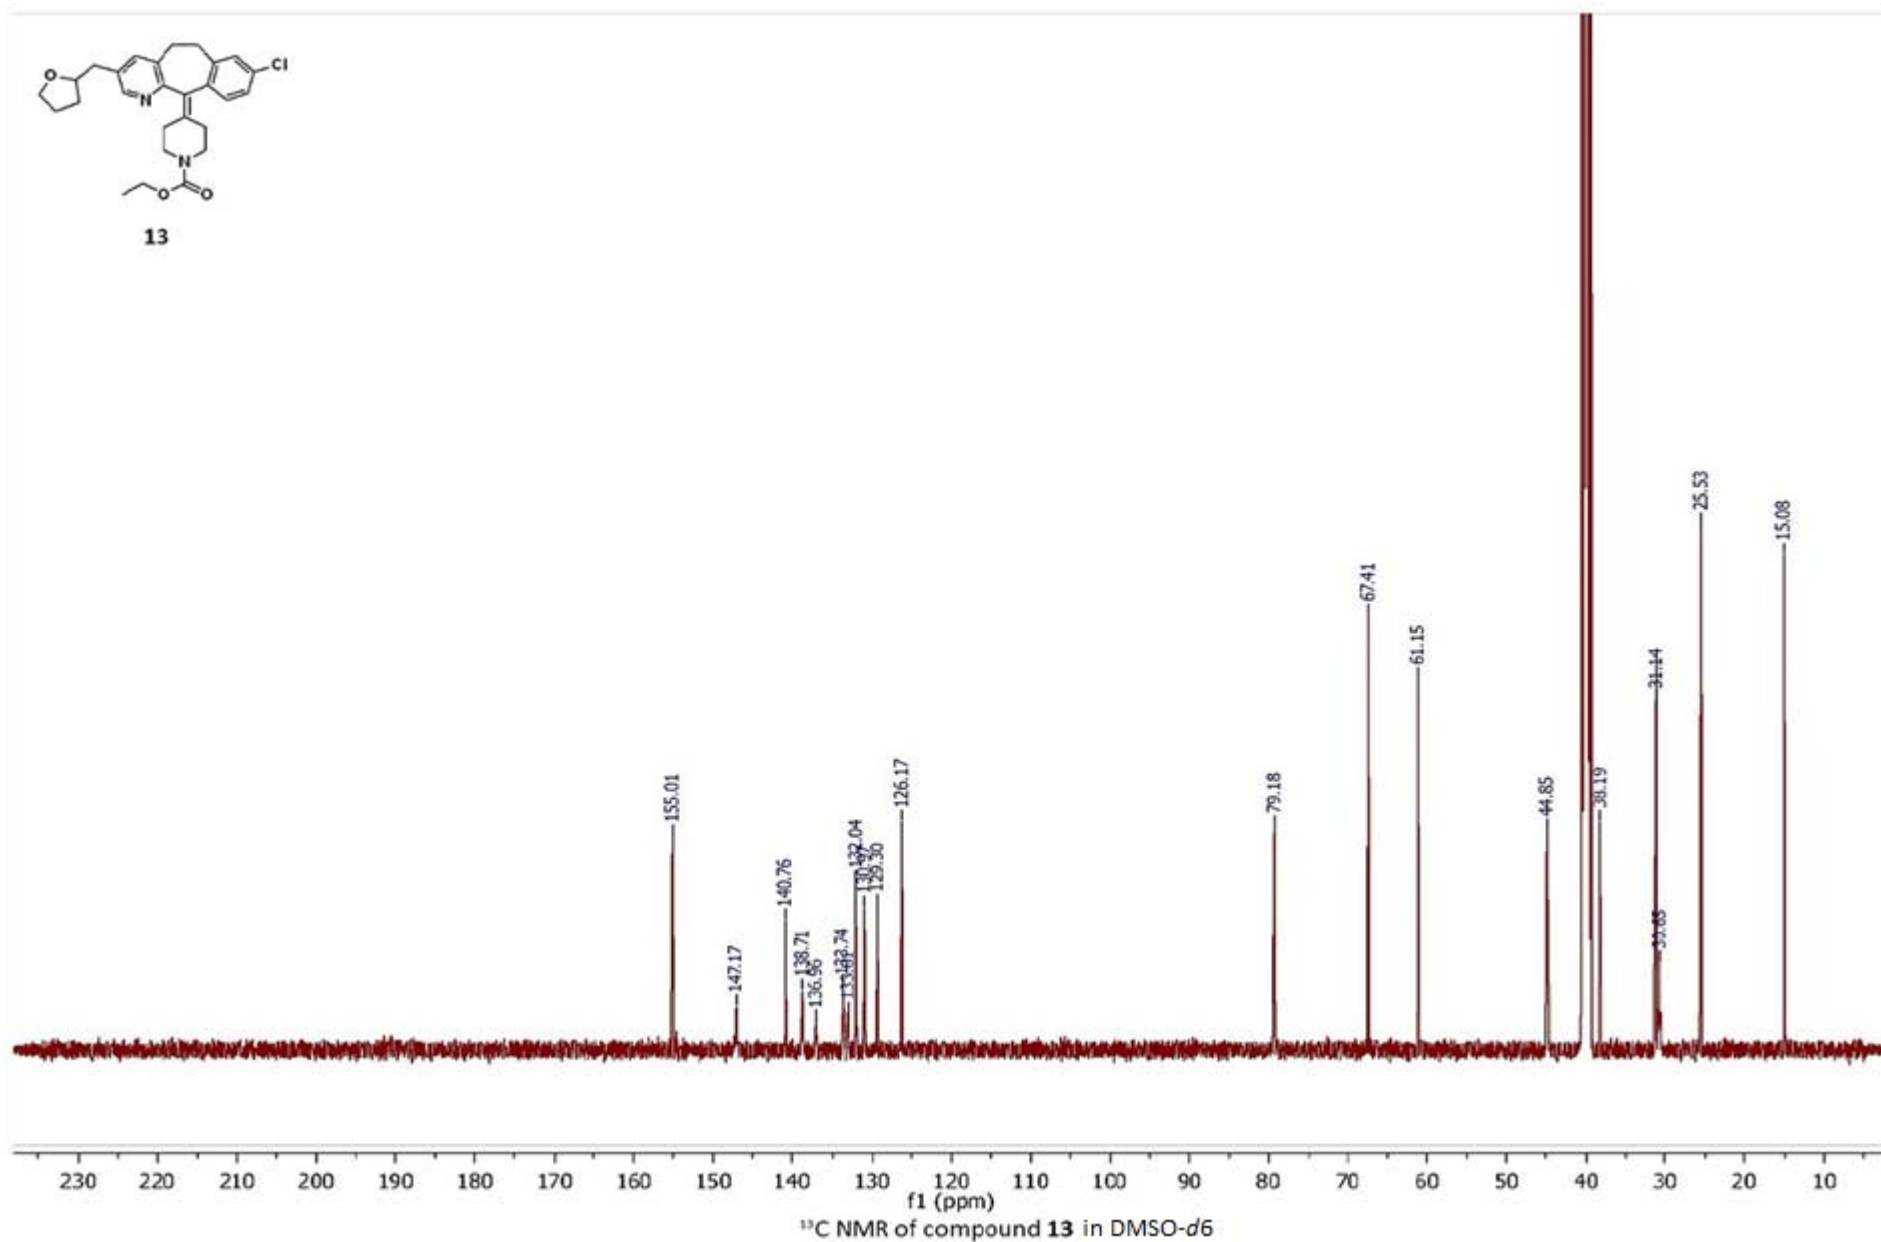

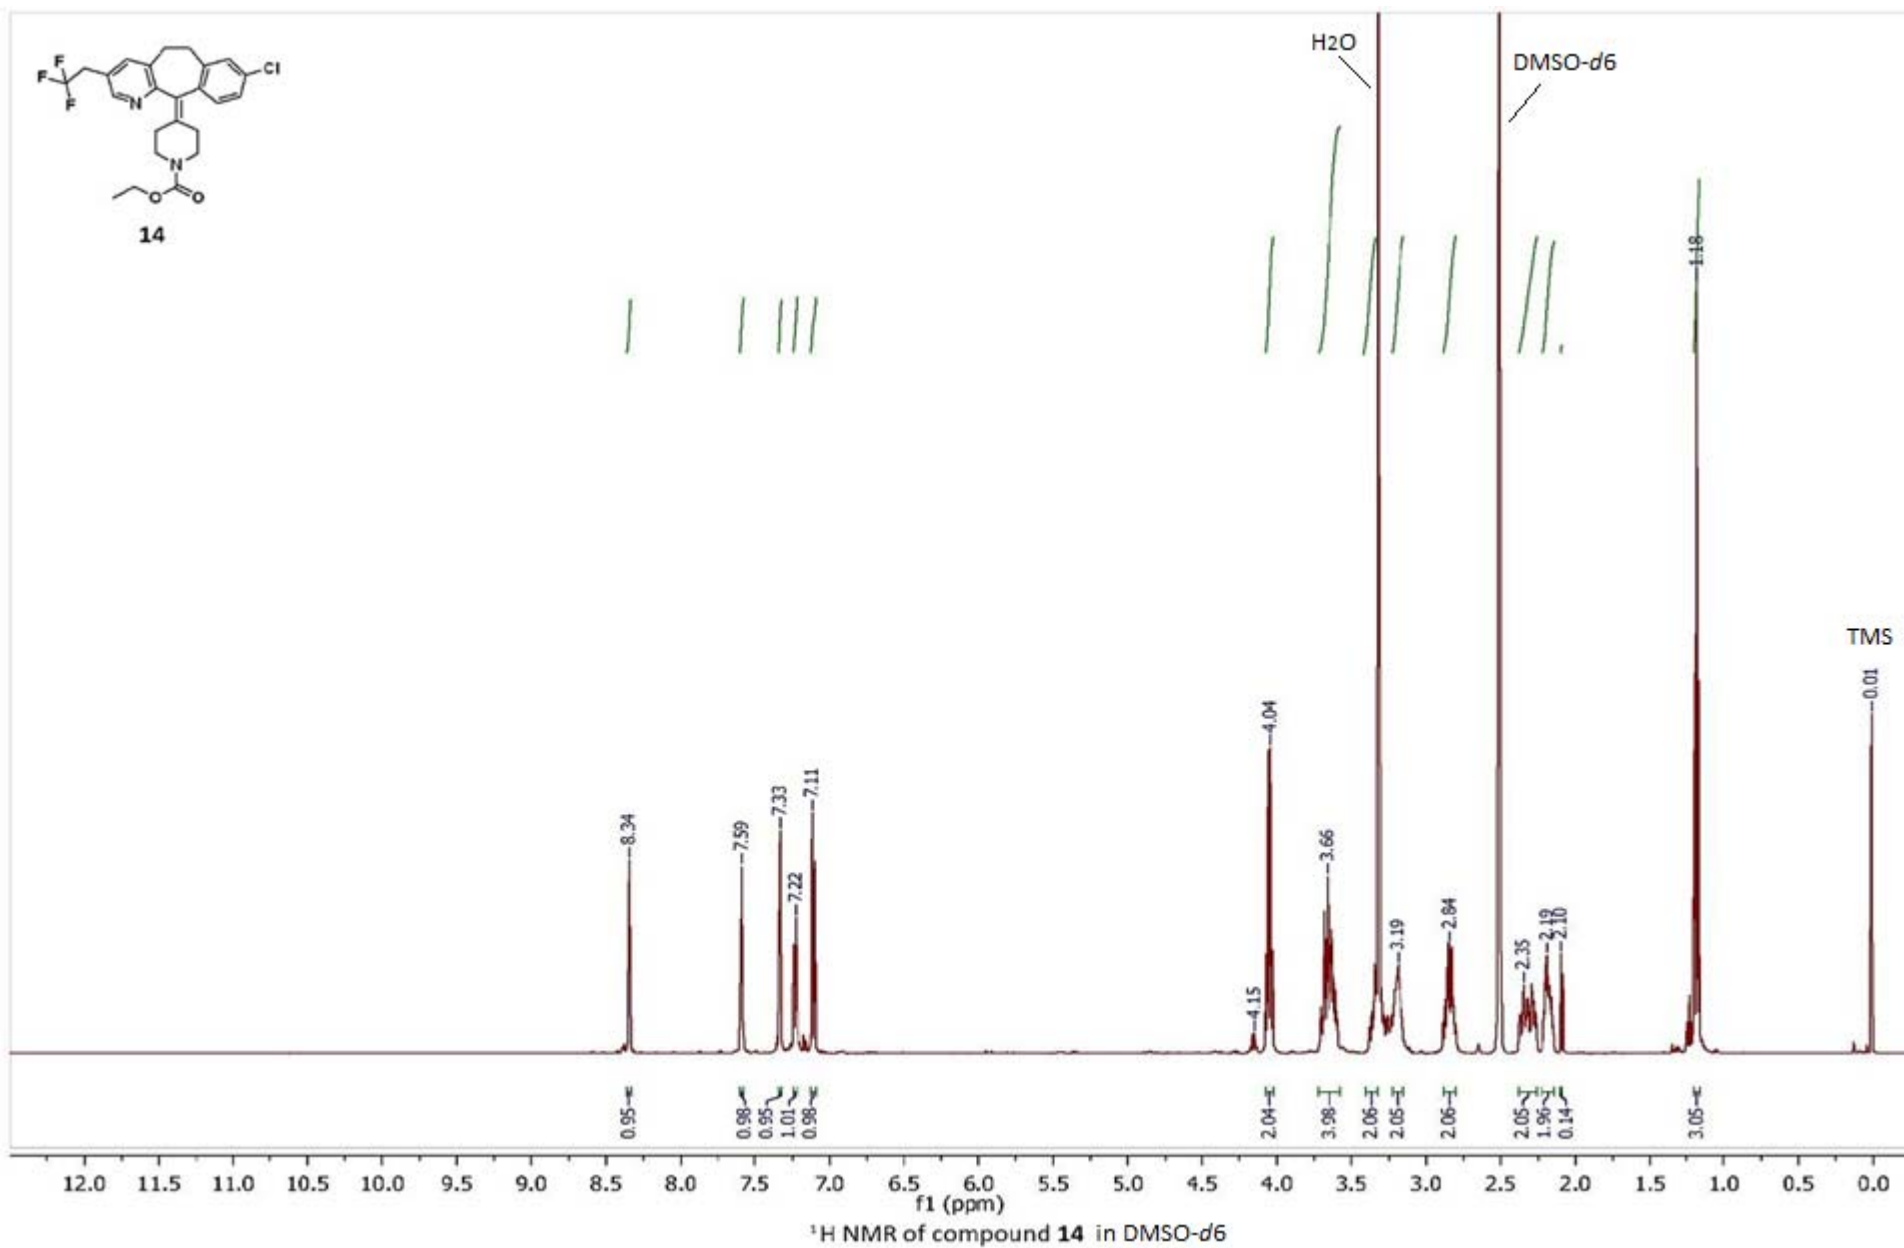

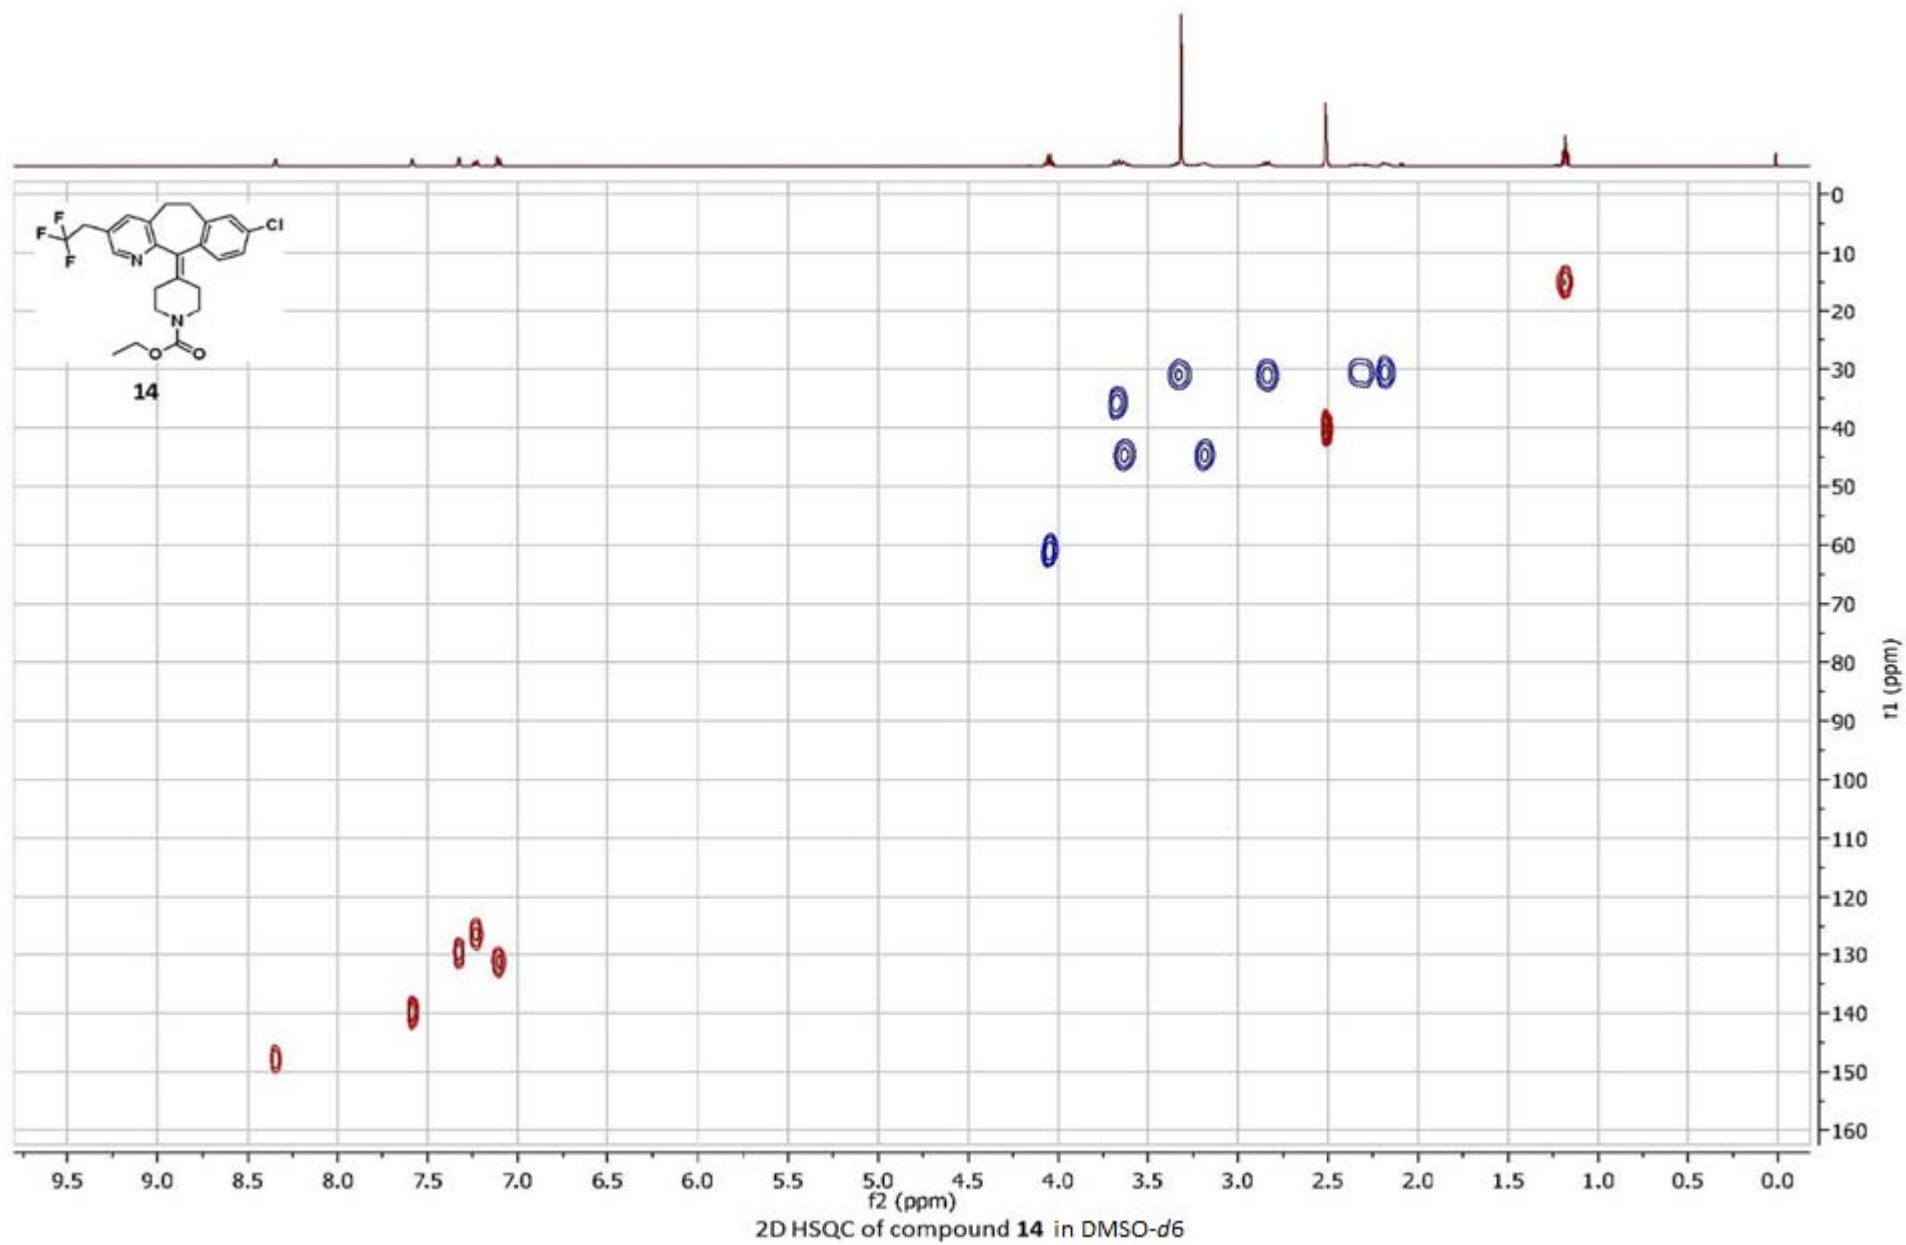

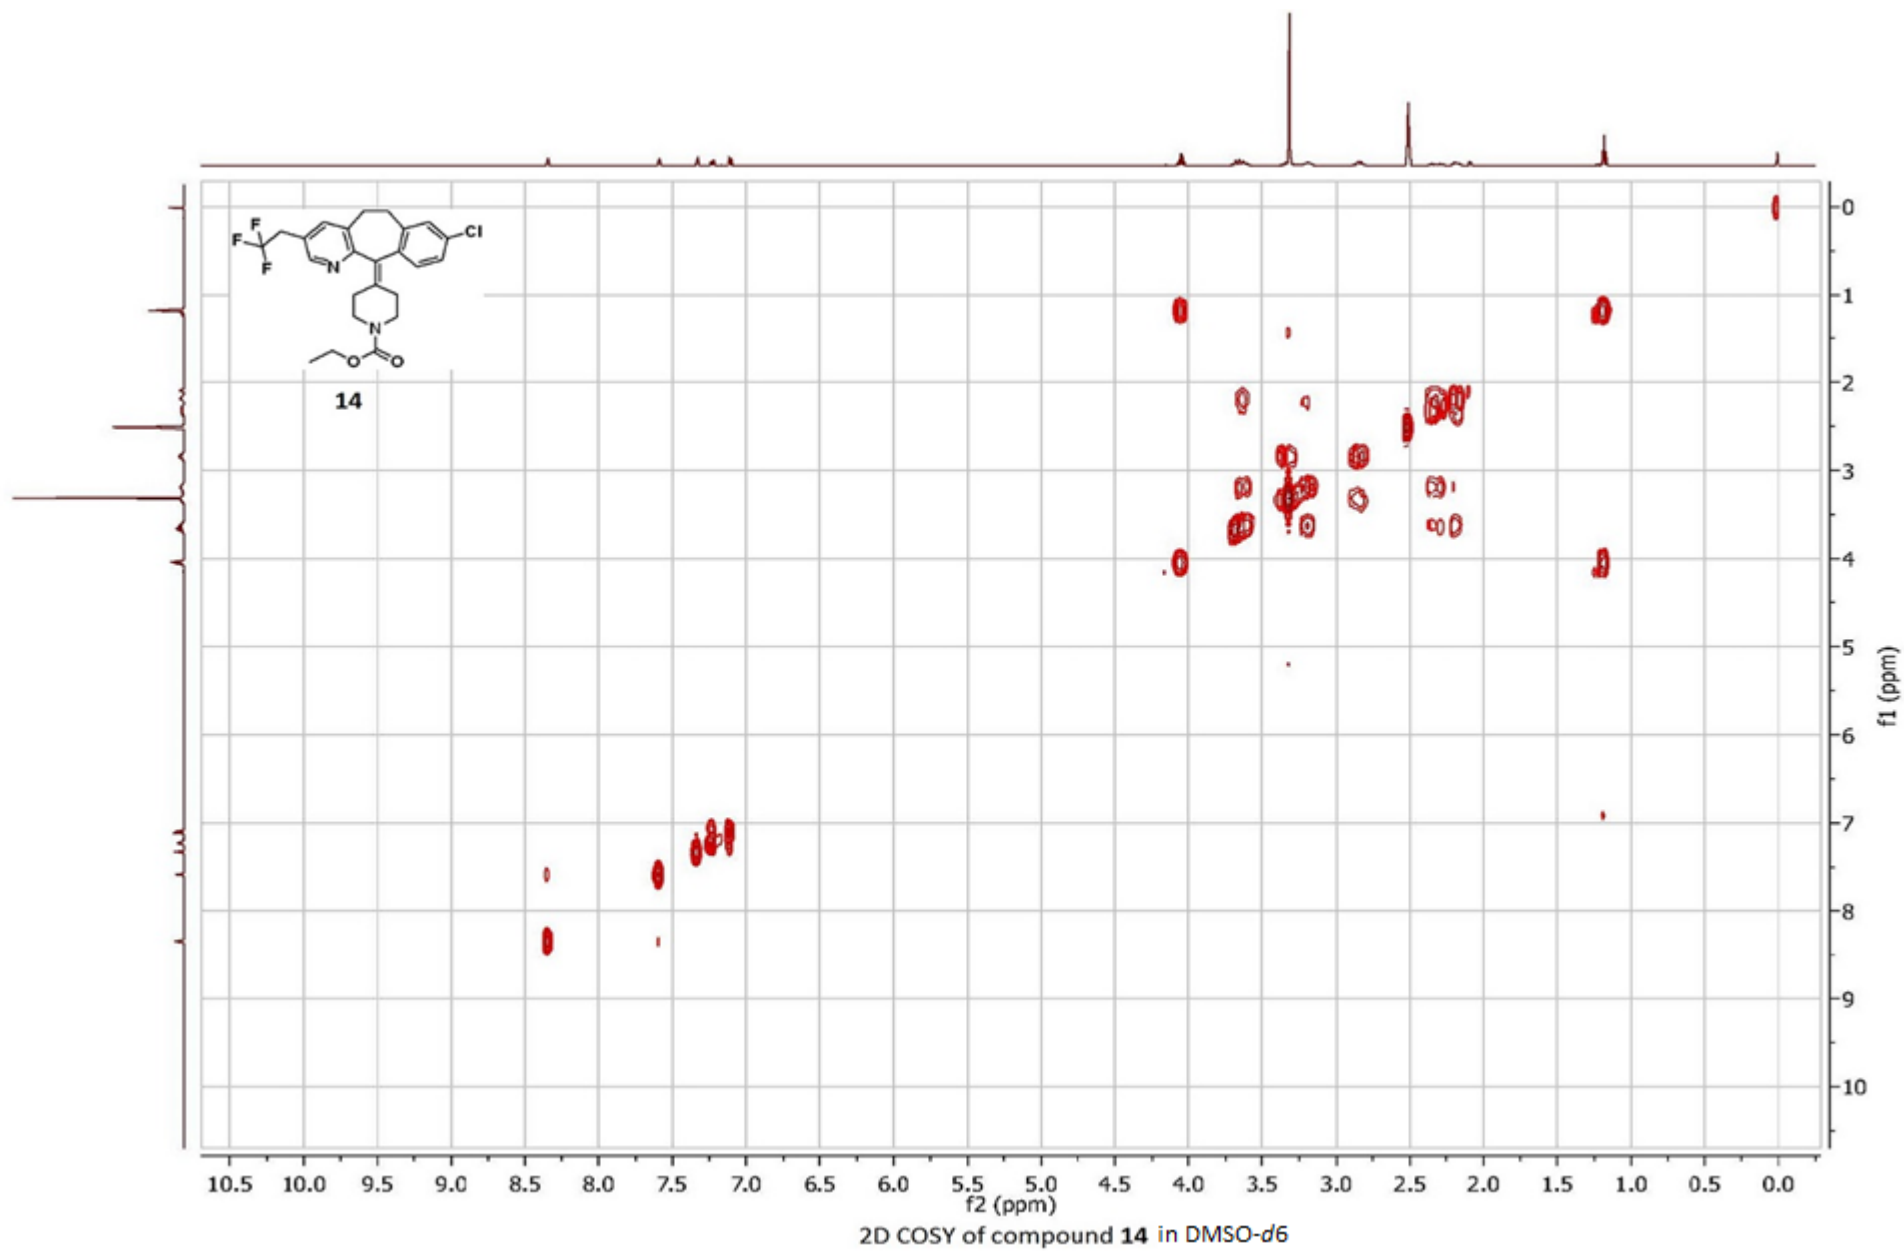

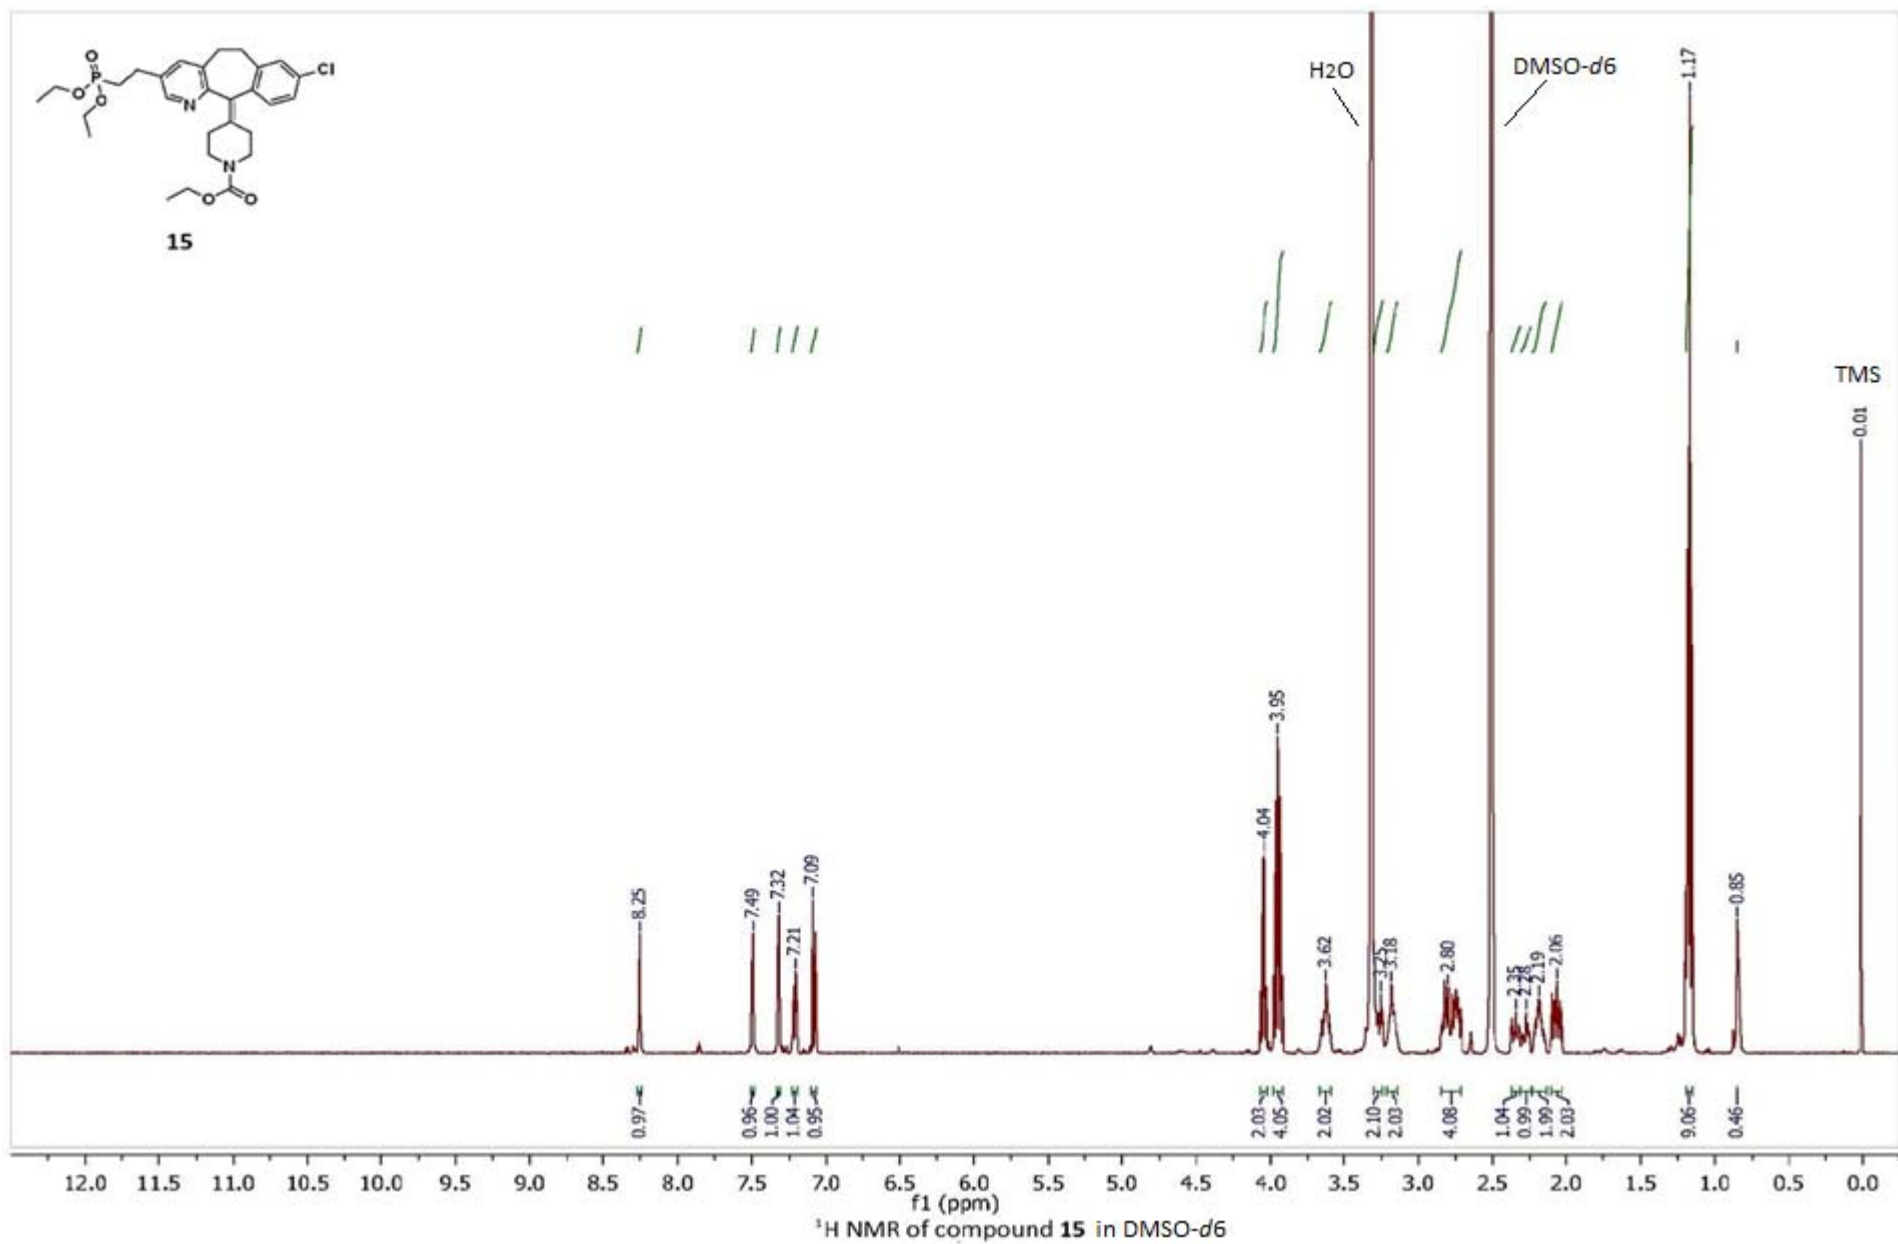



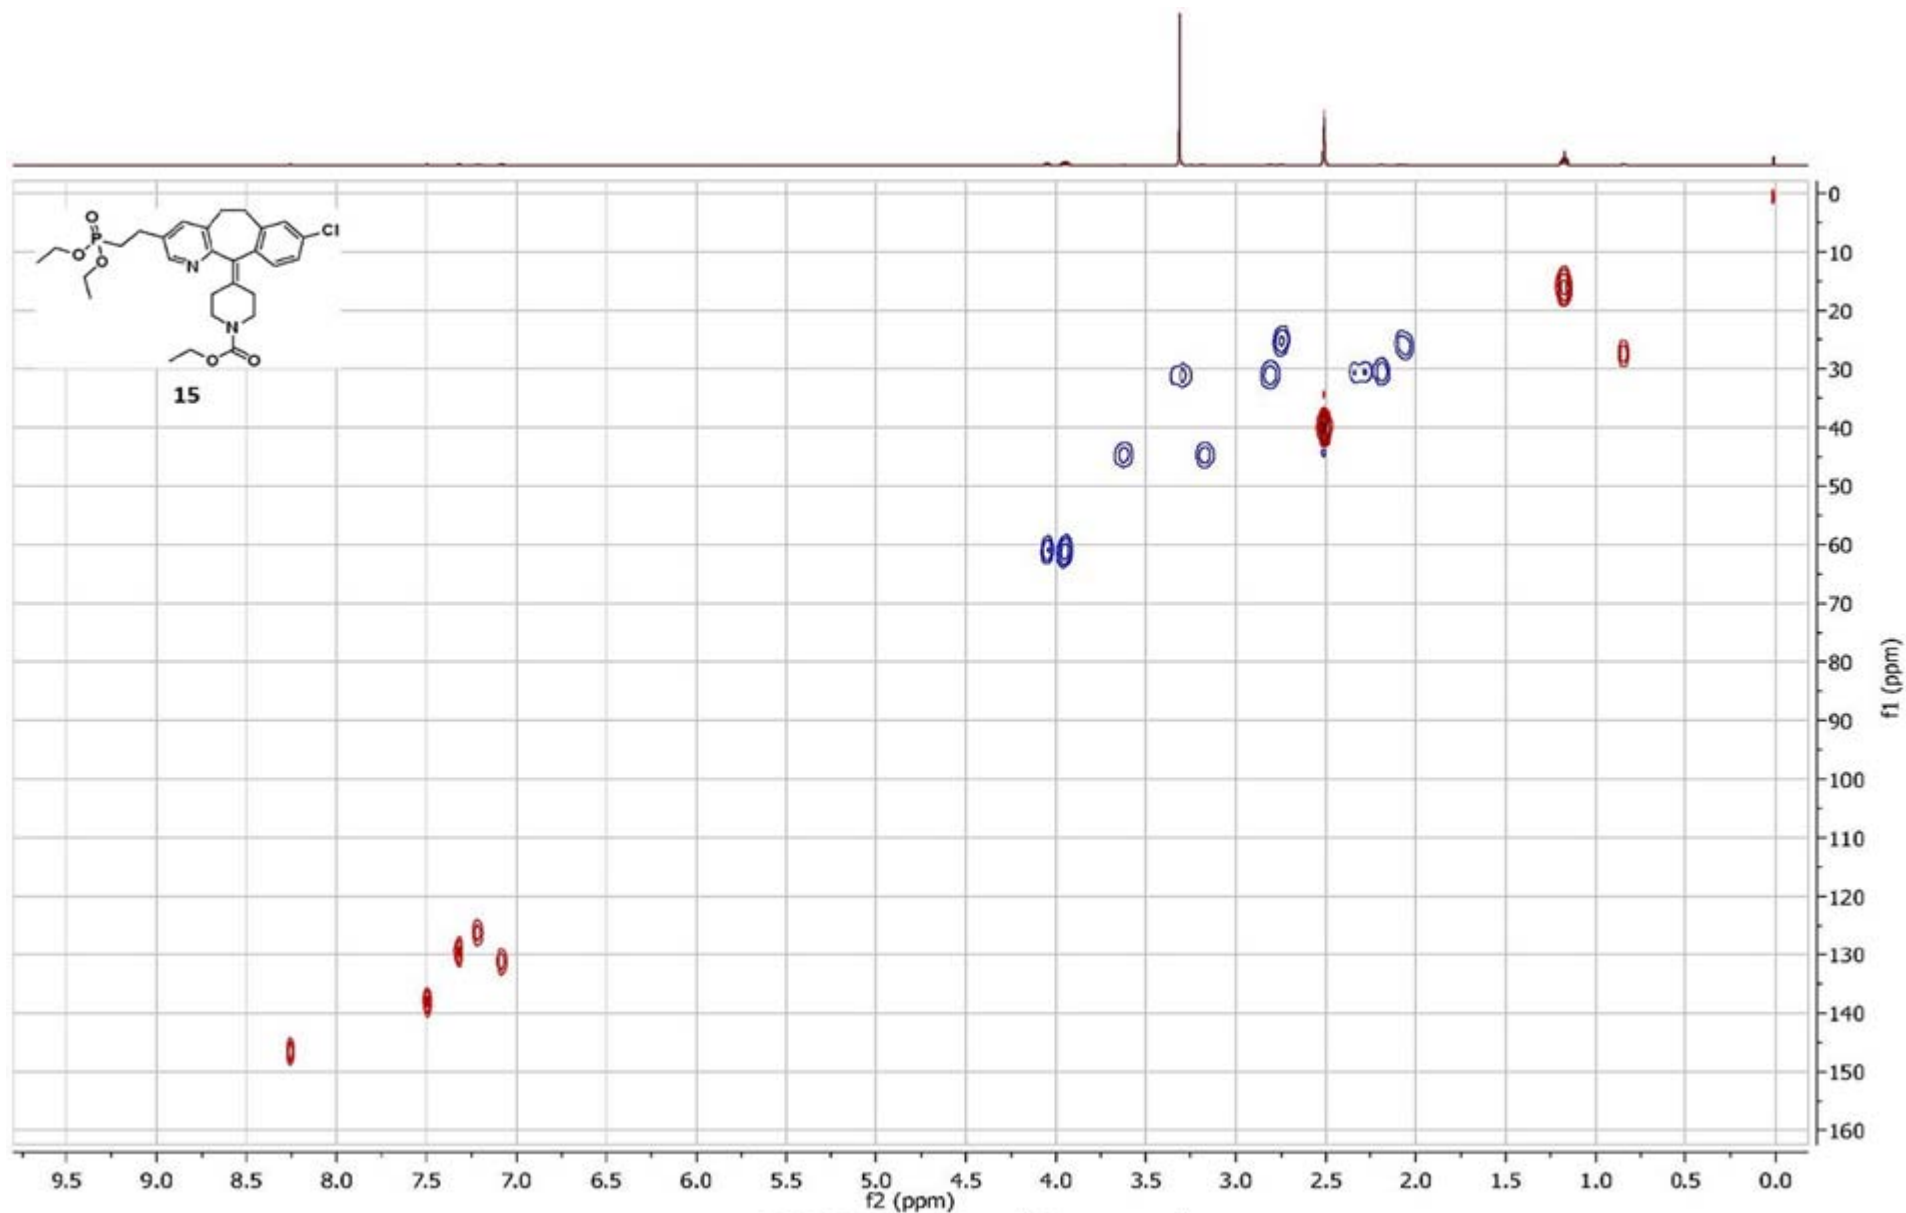

2D HSQC of compound 15 in DMSO- $d_6$

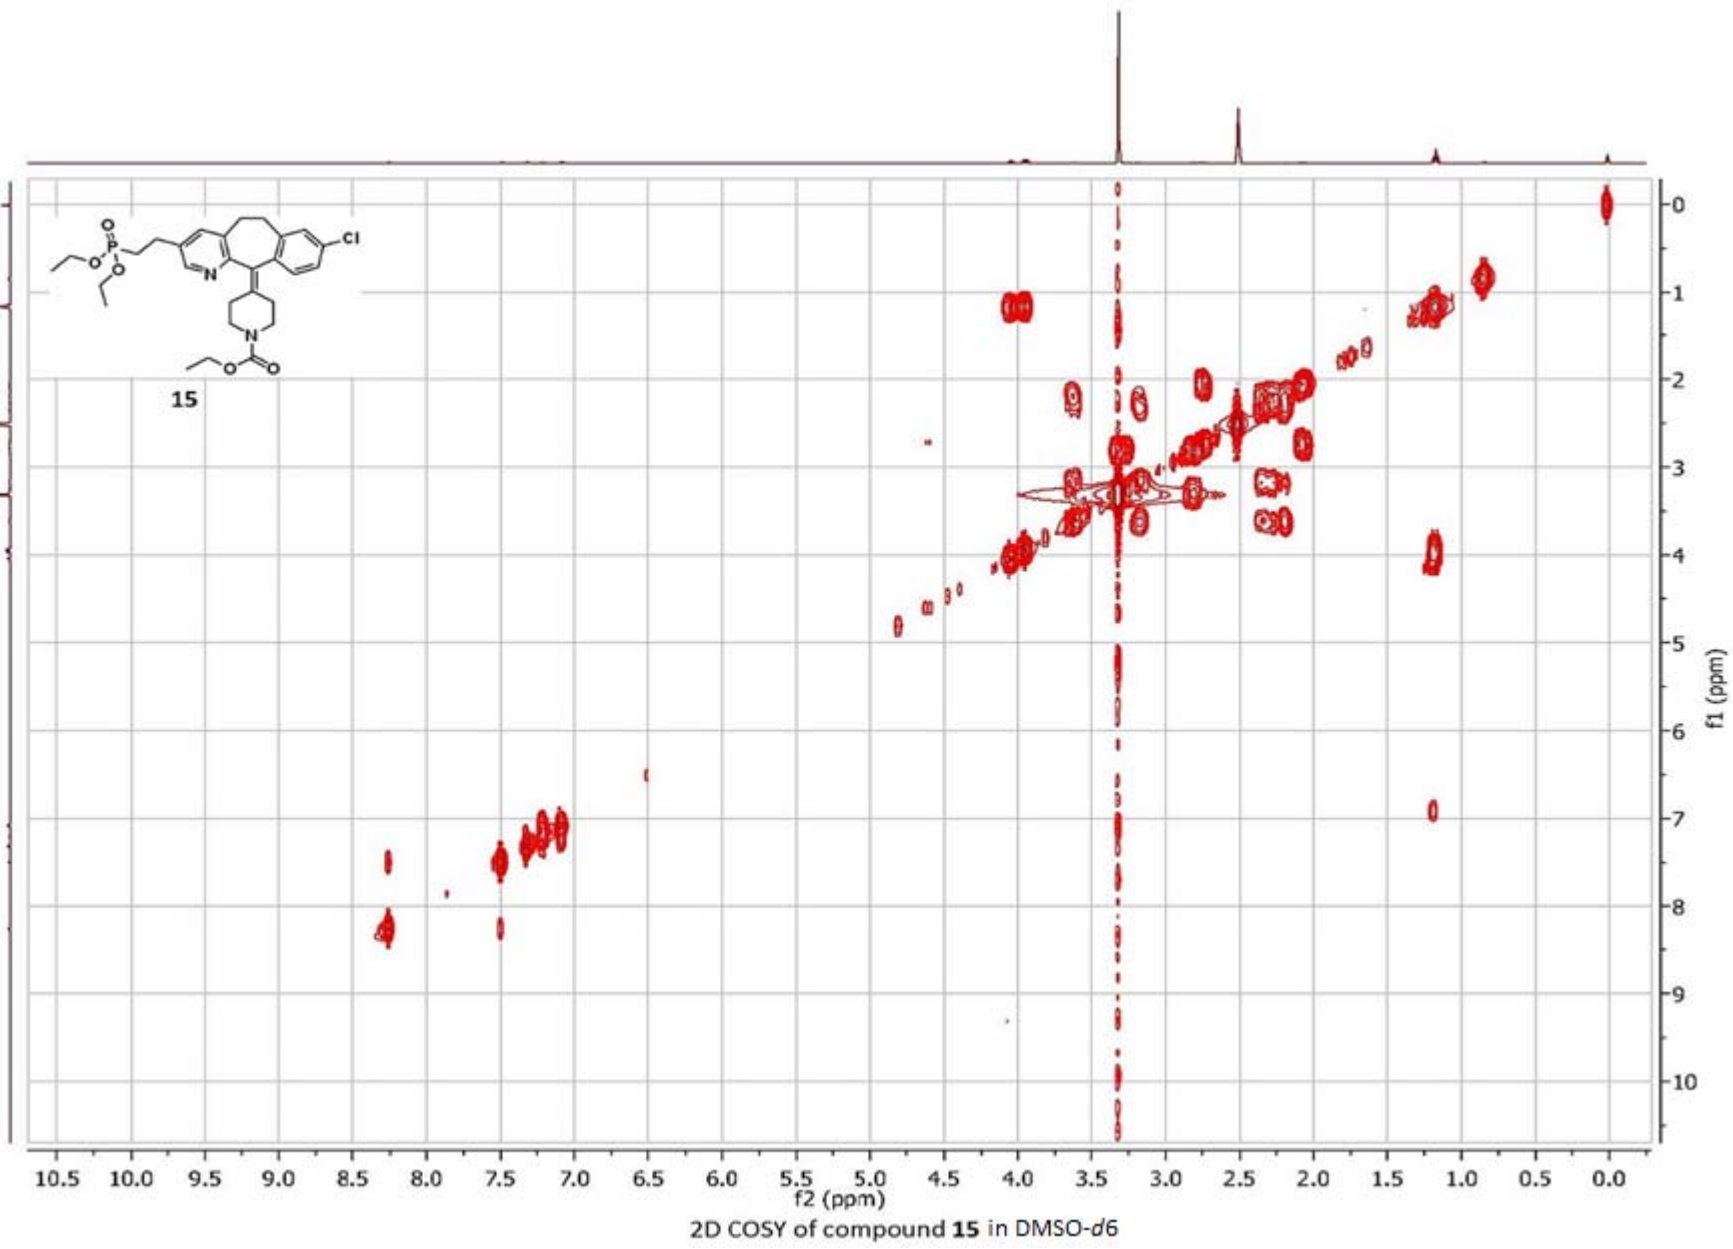

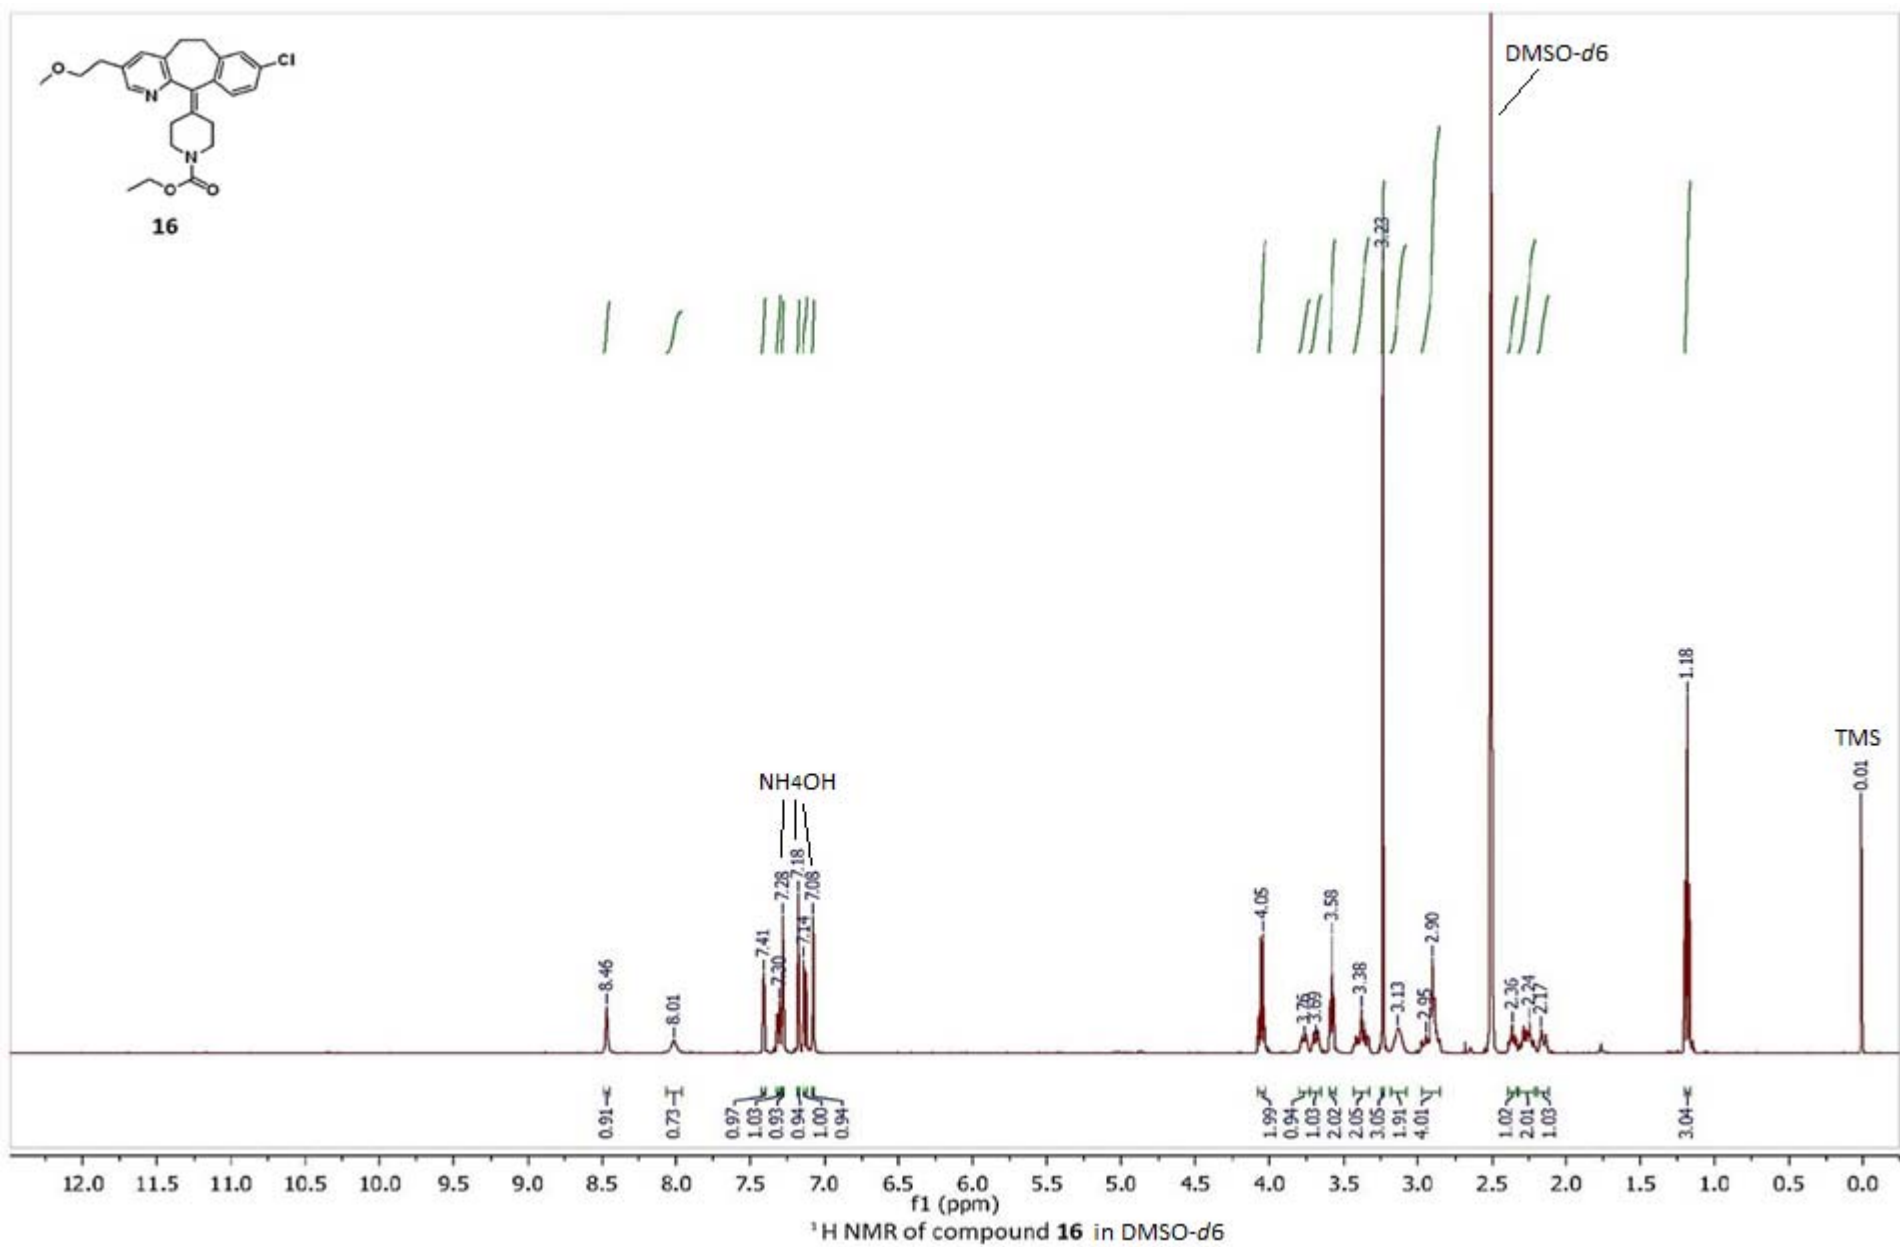

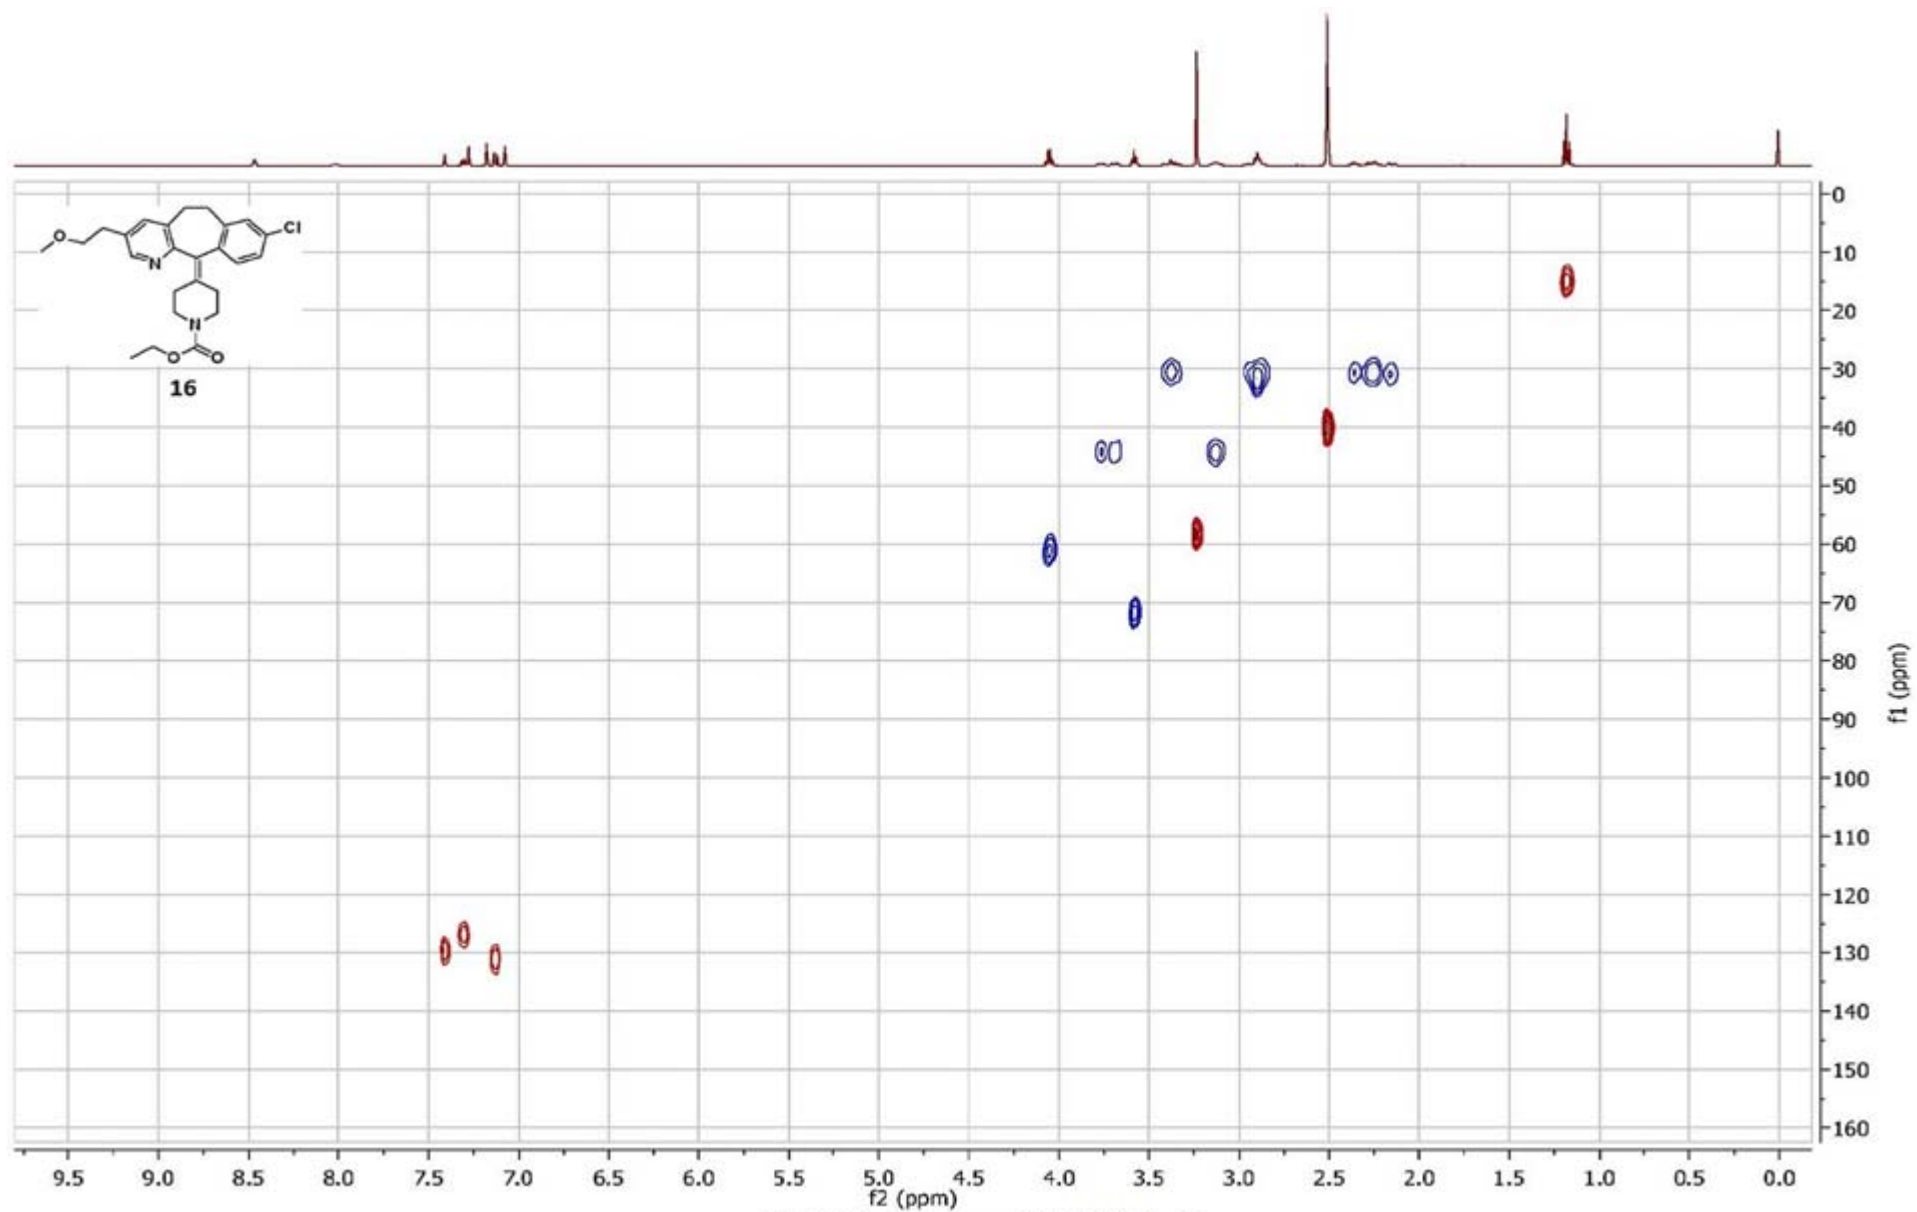

2D HSQC of compound **16** in DMSO- $d_6$

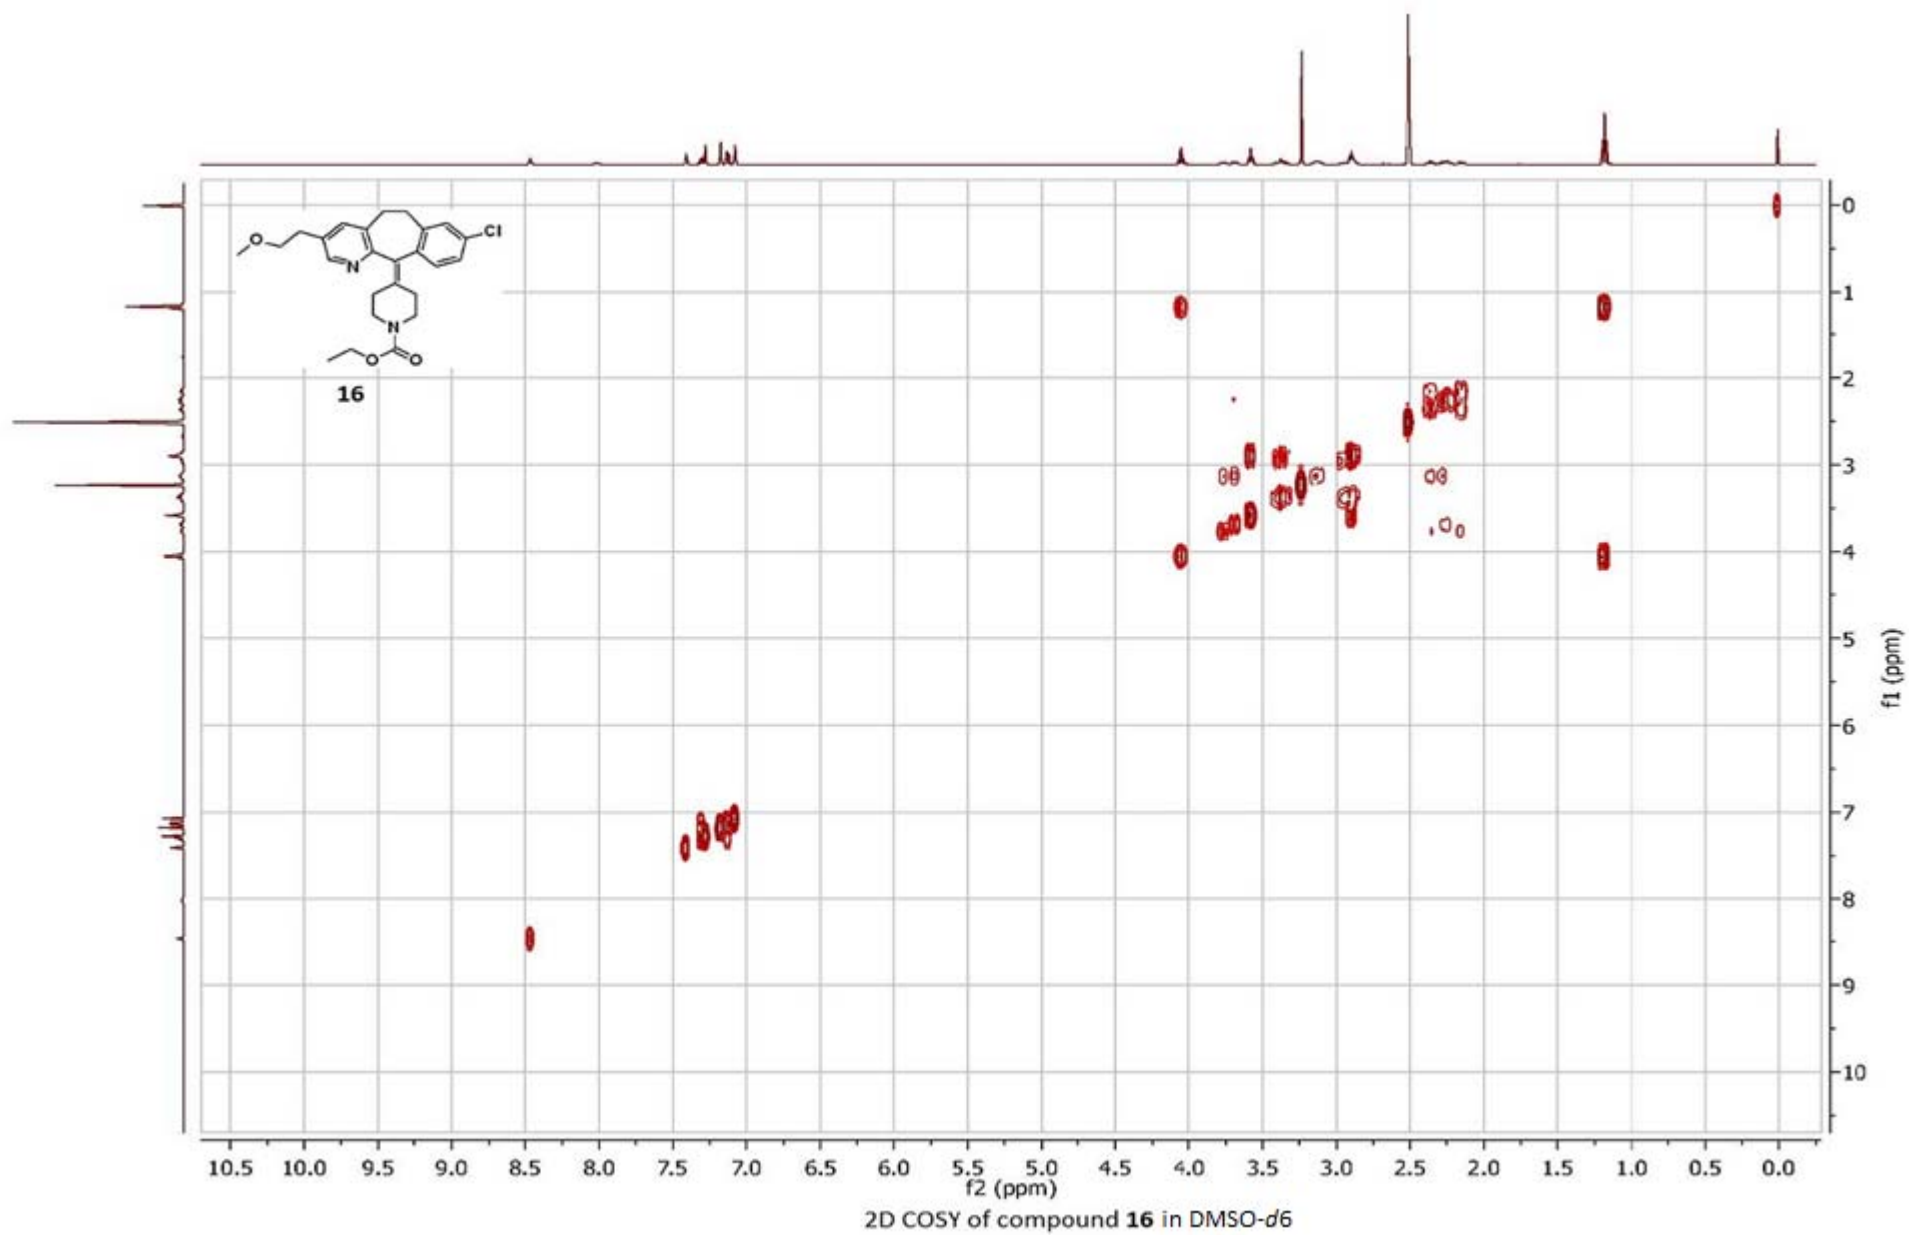

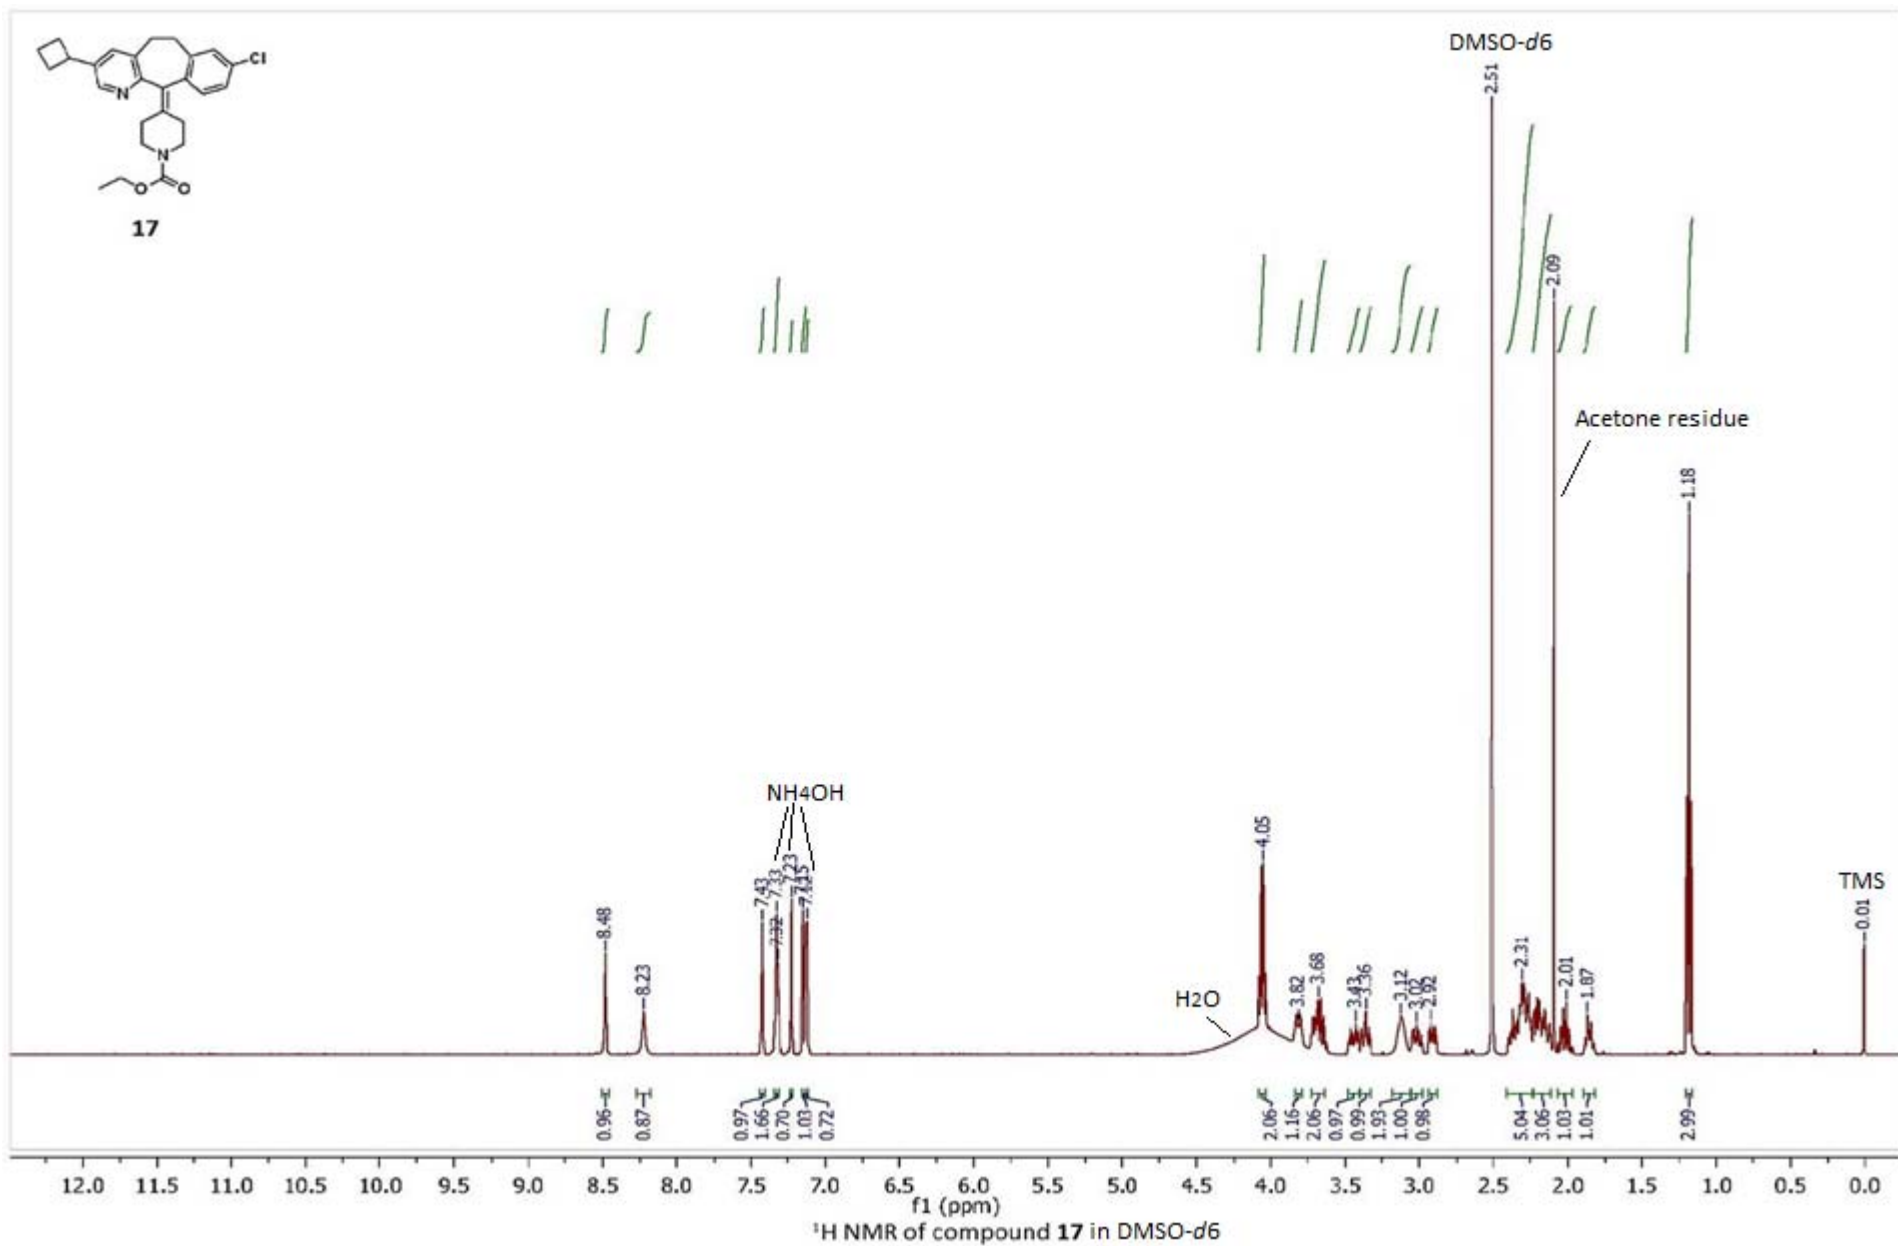

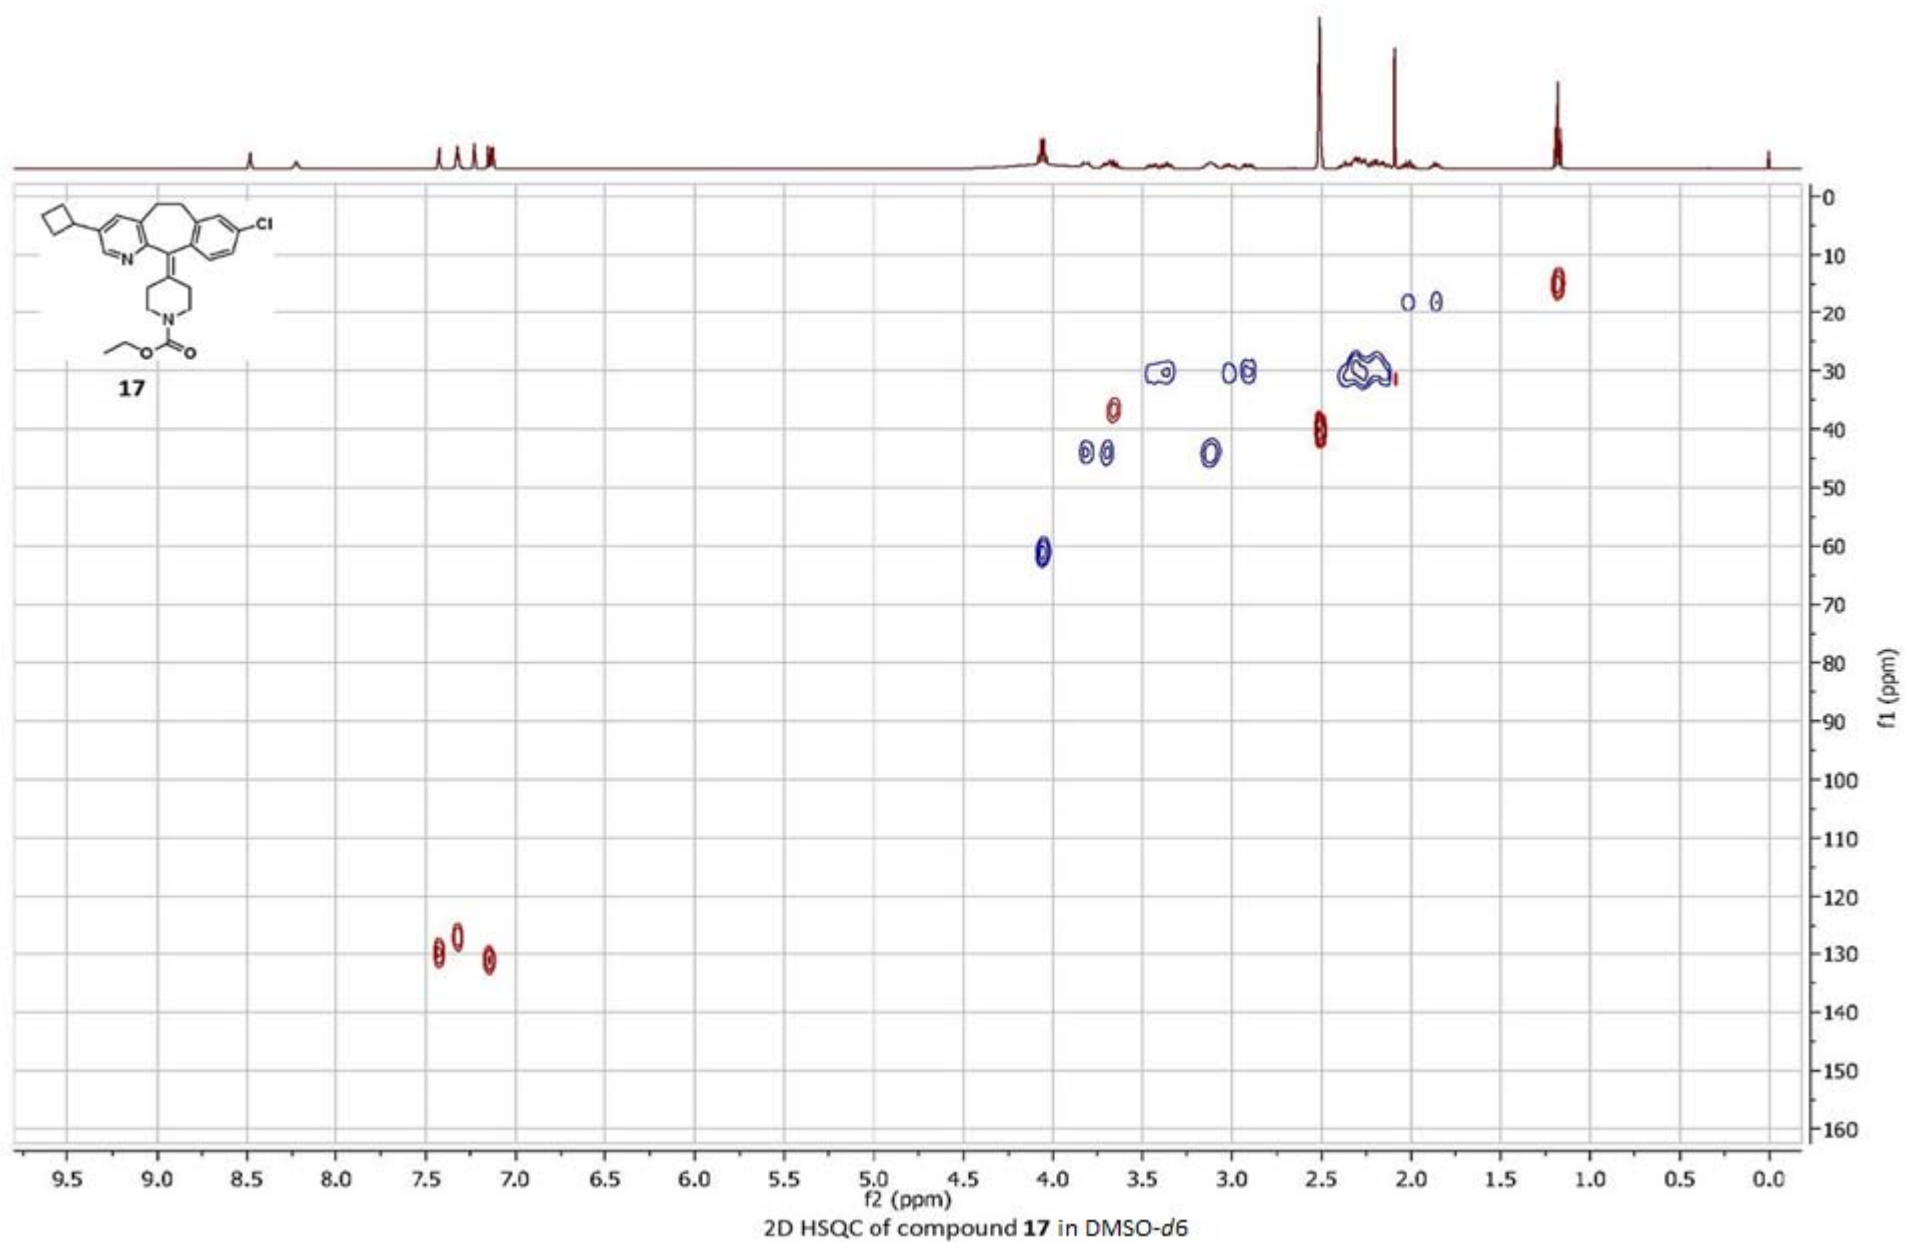

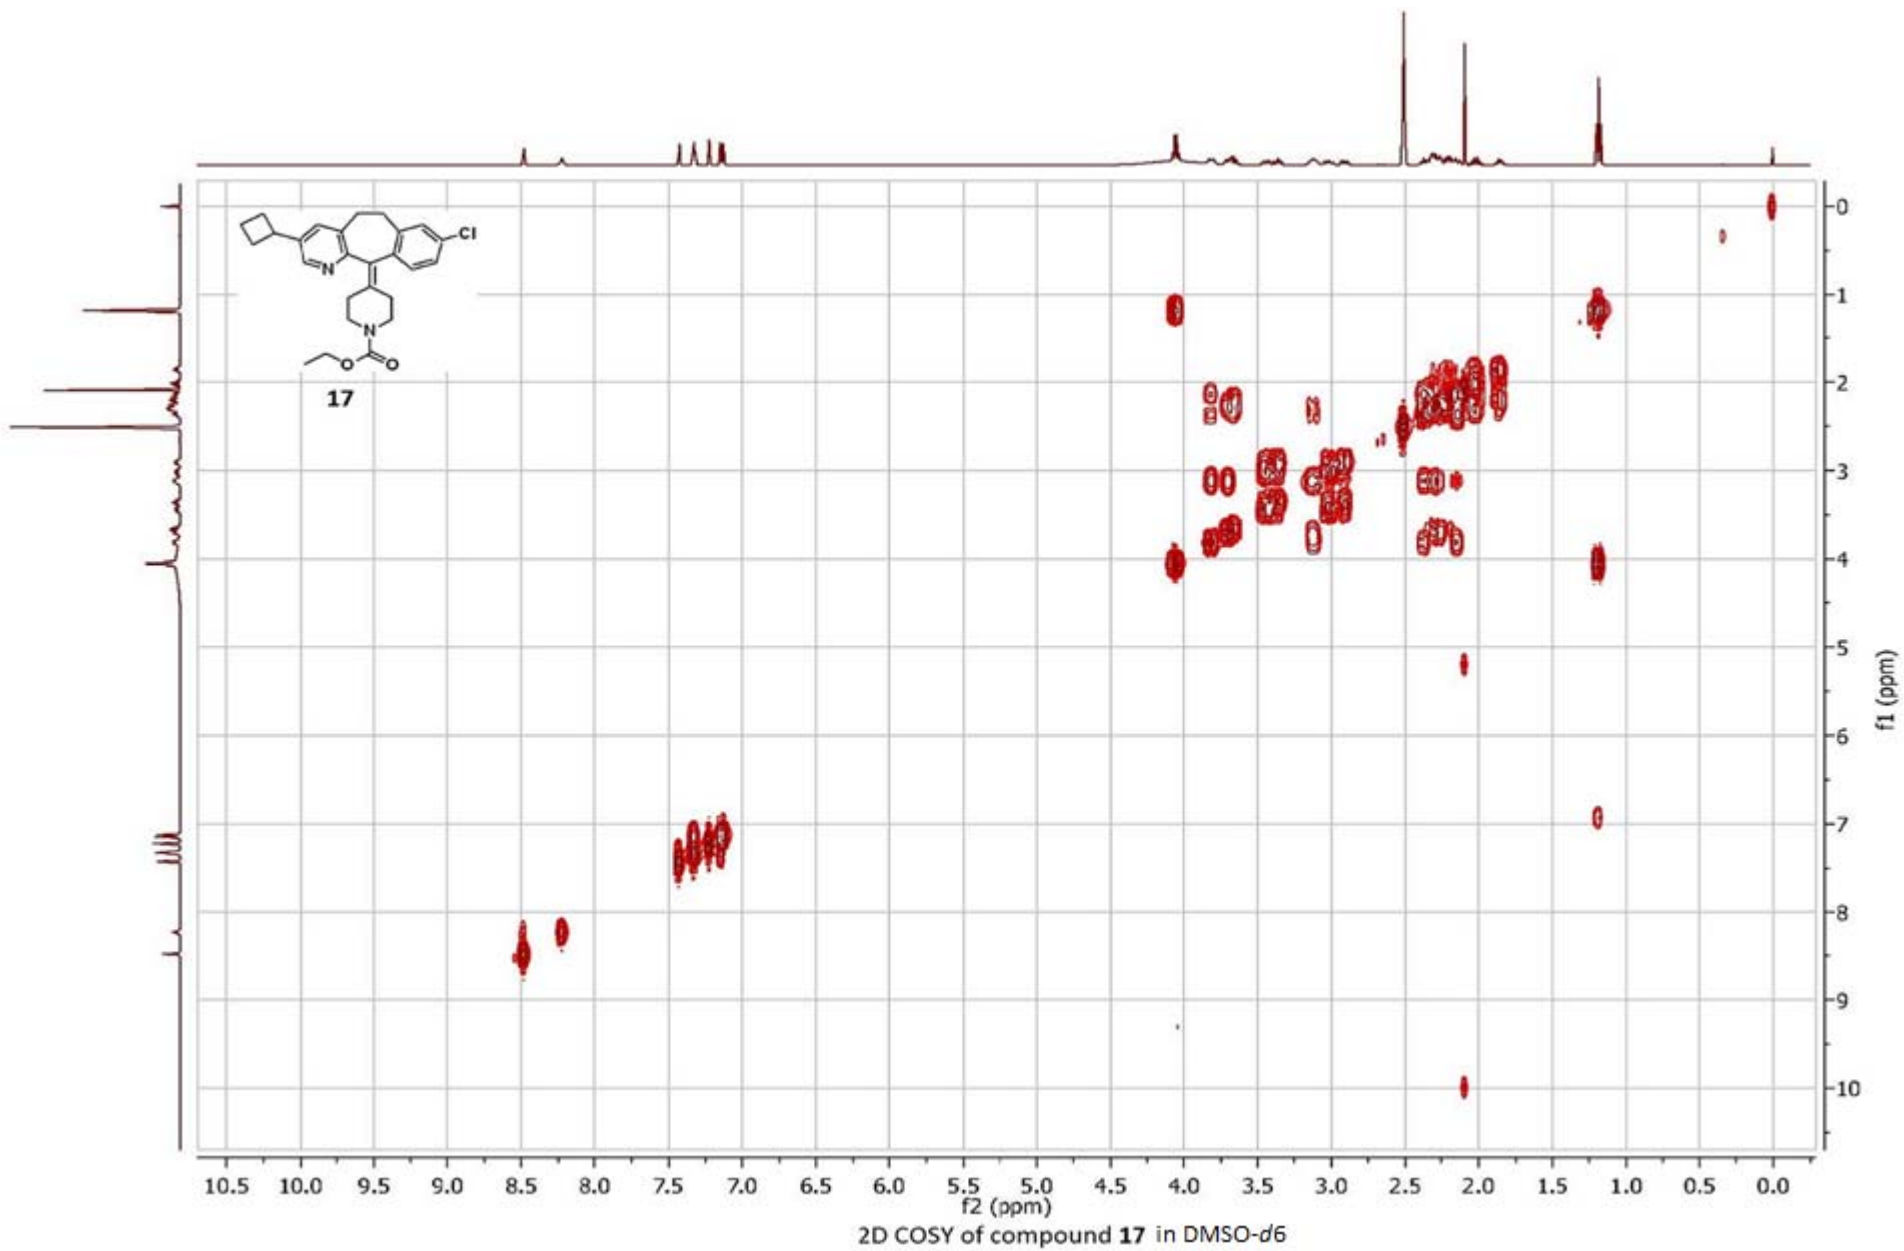



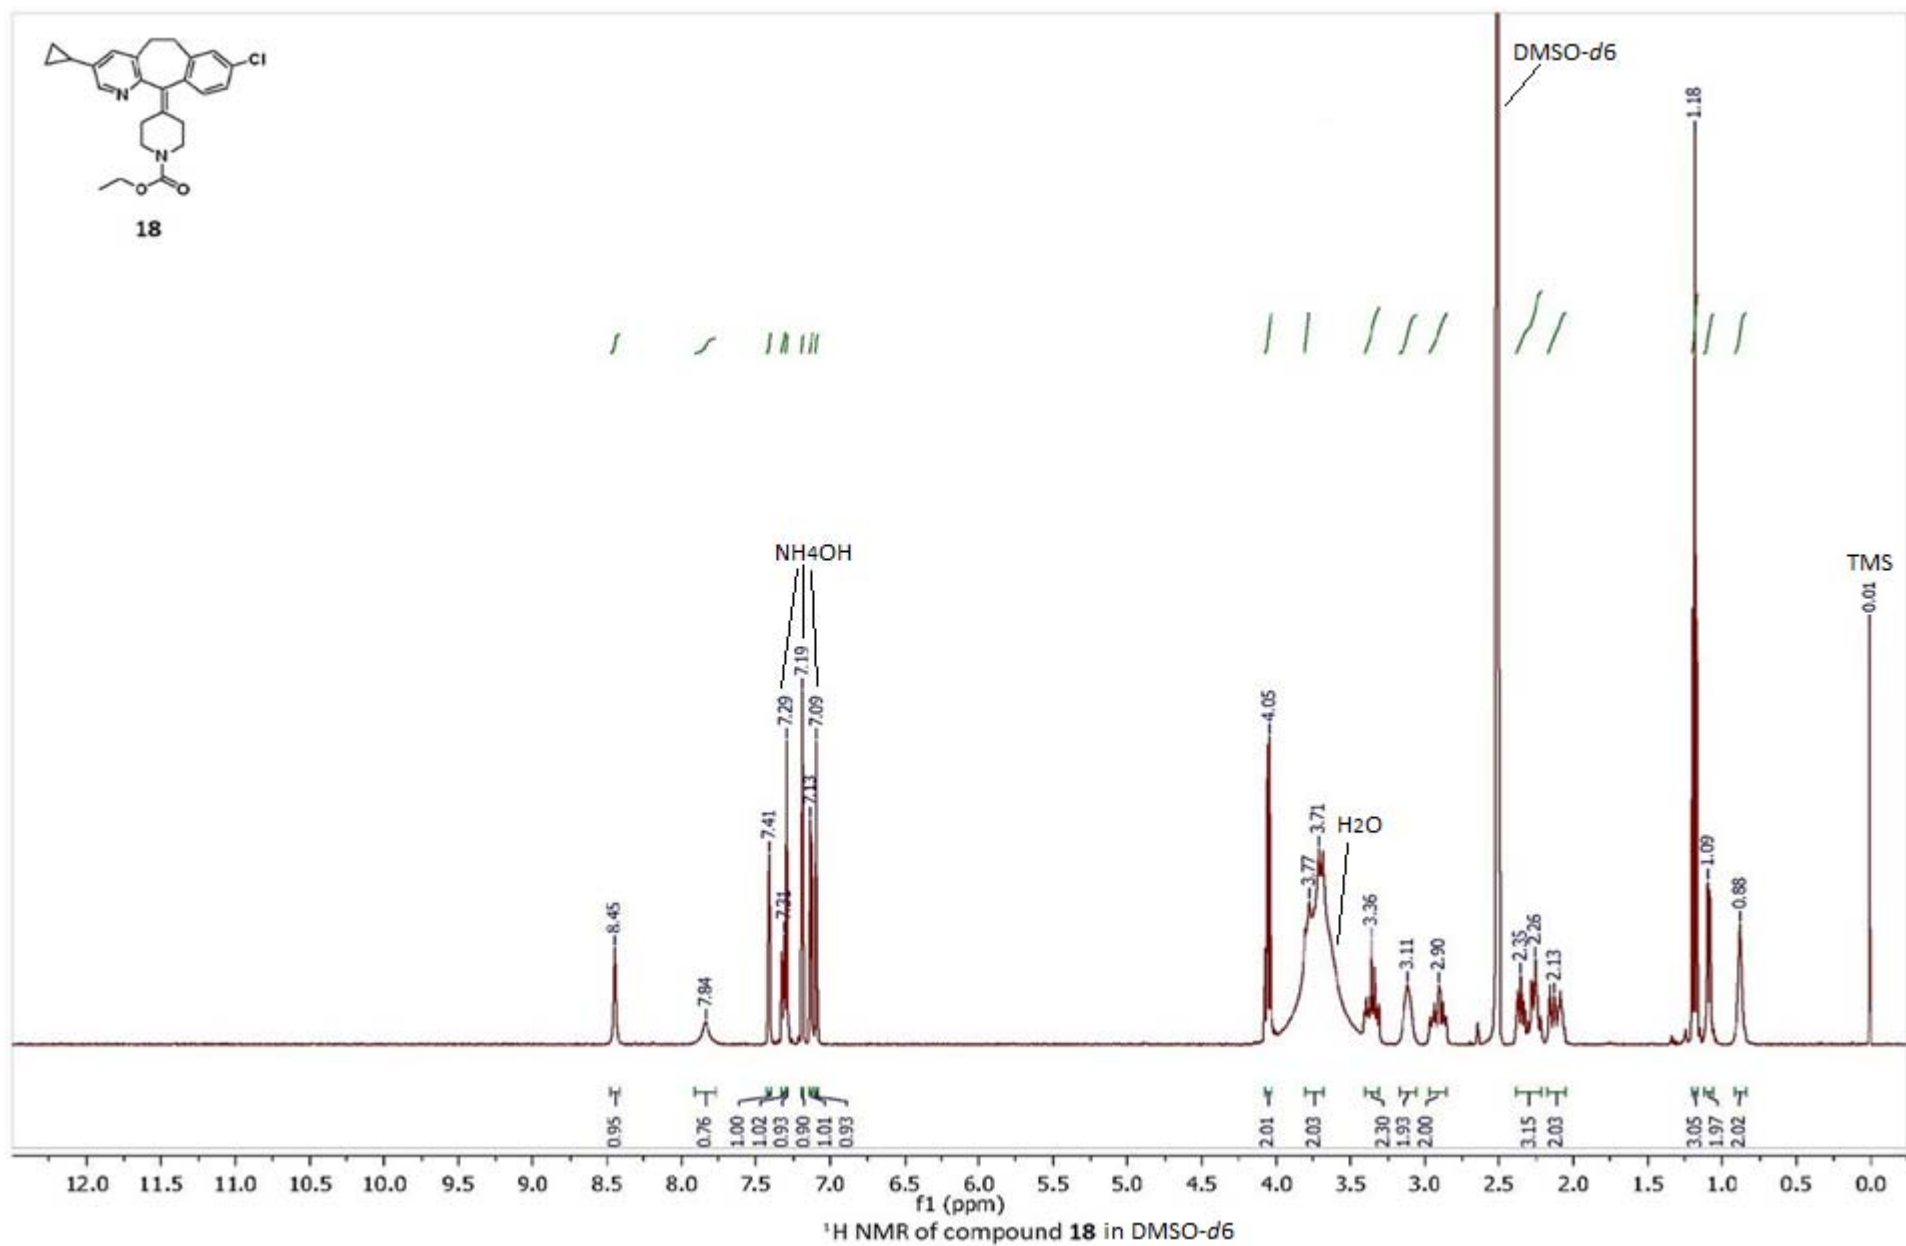

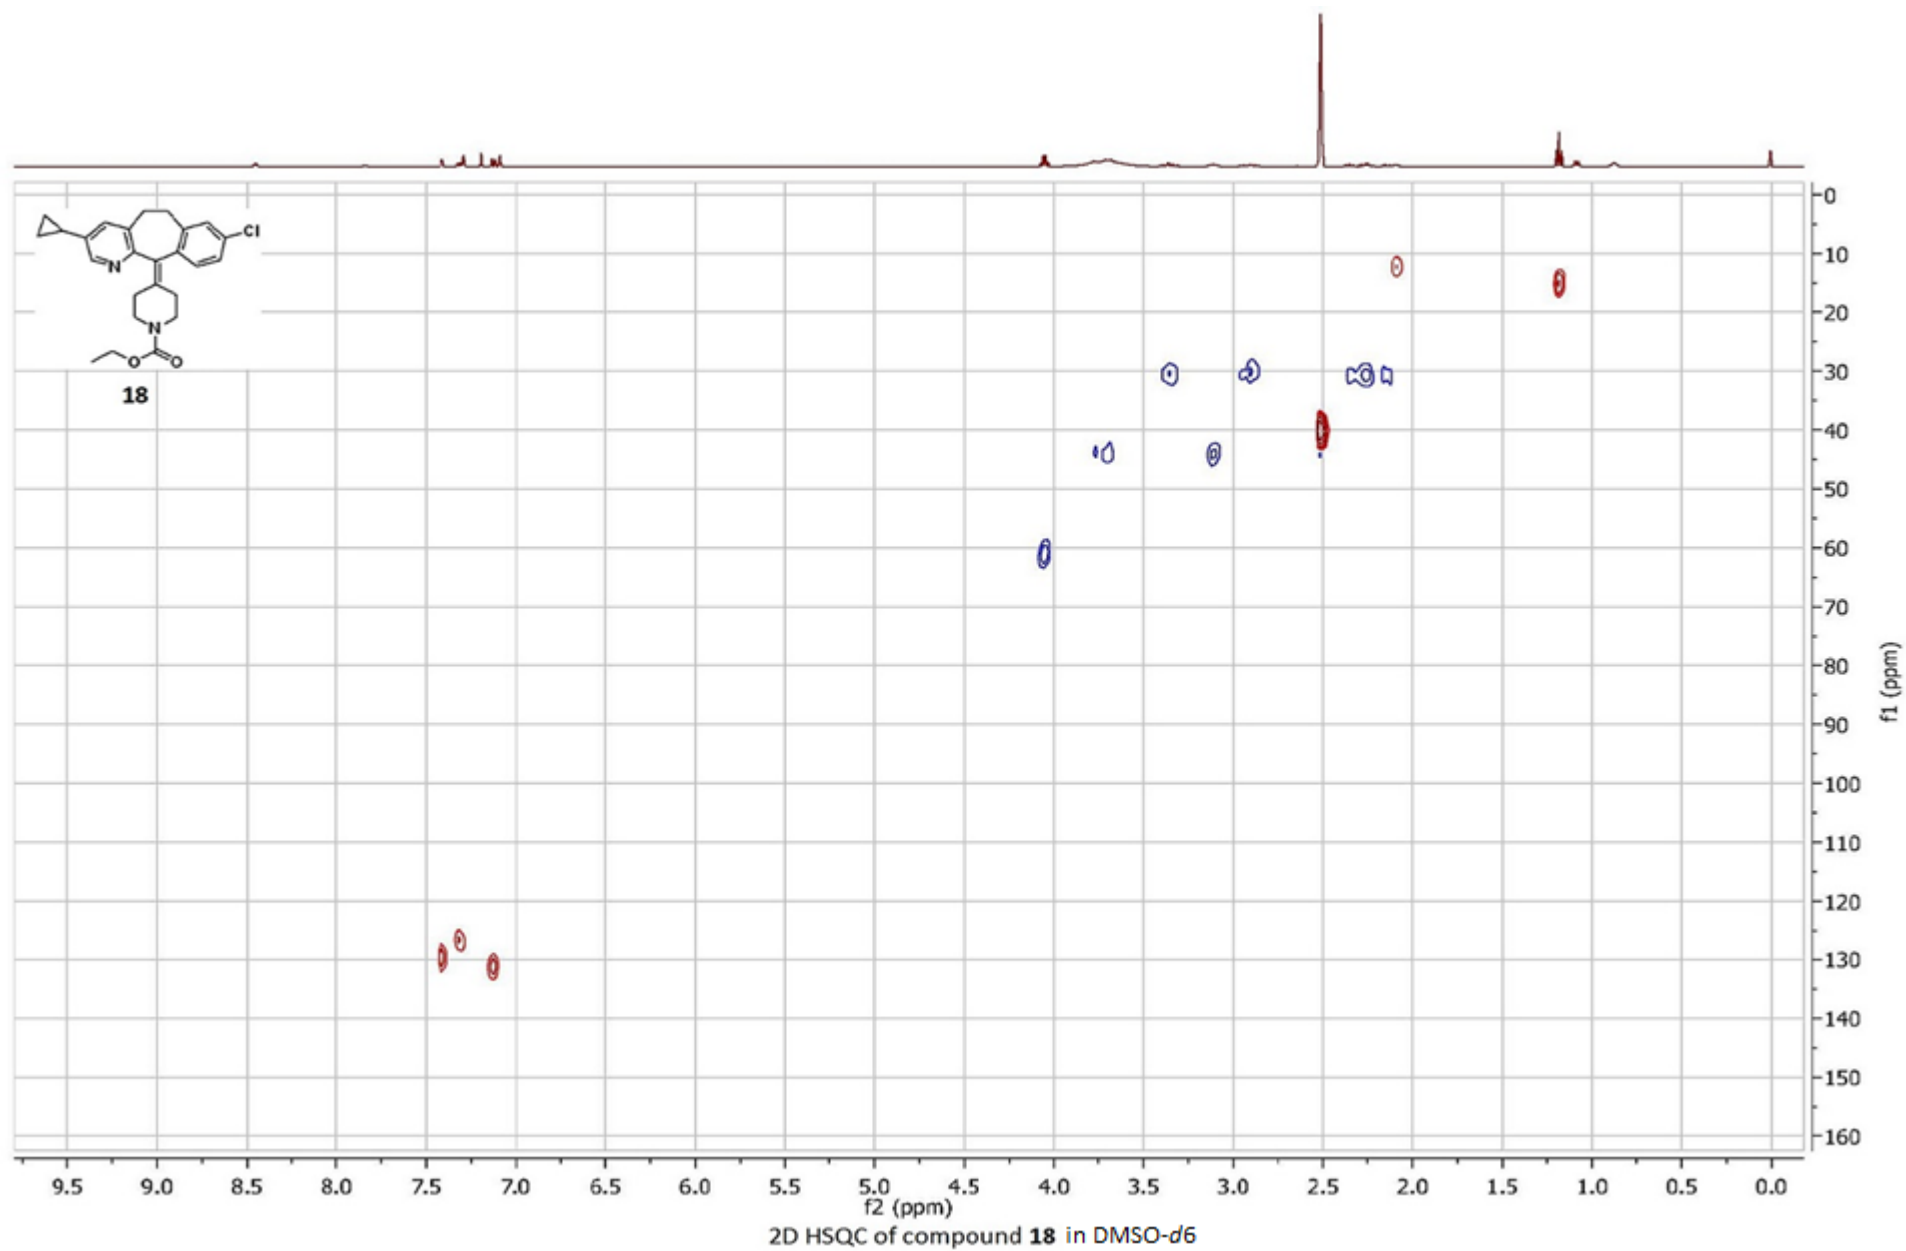

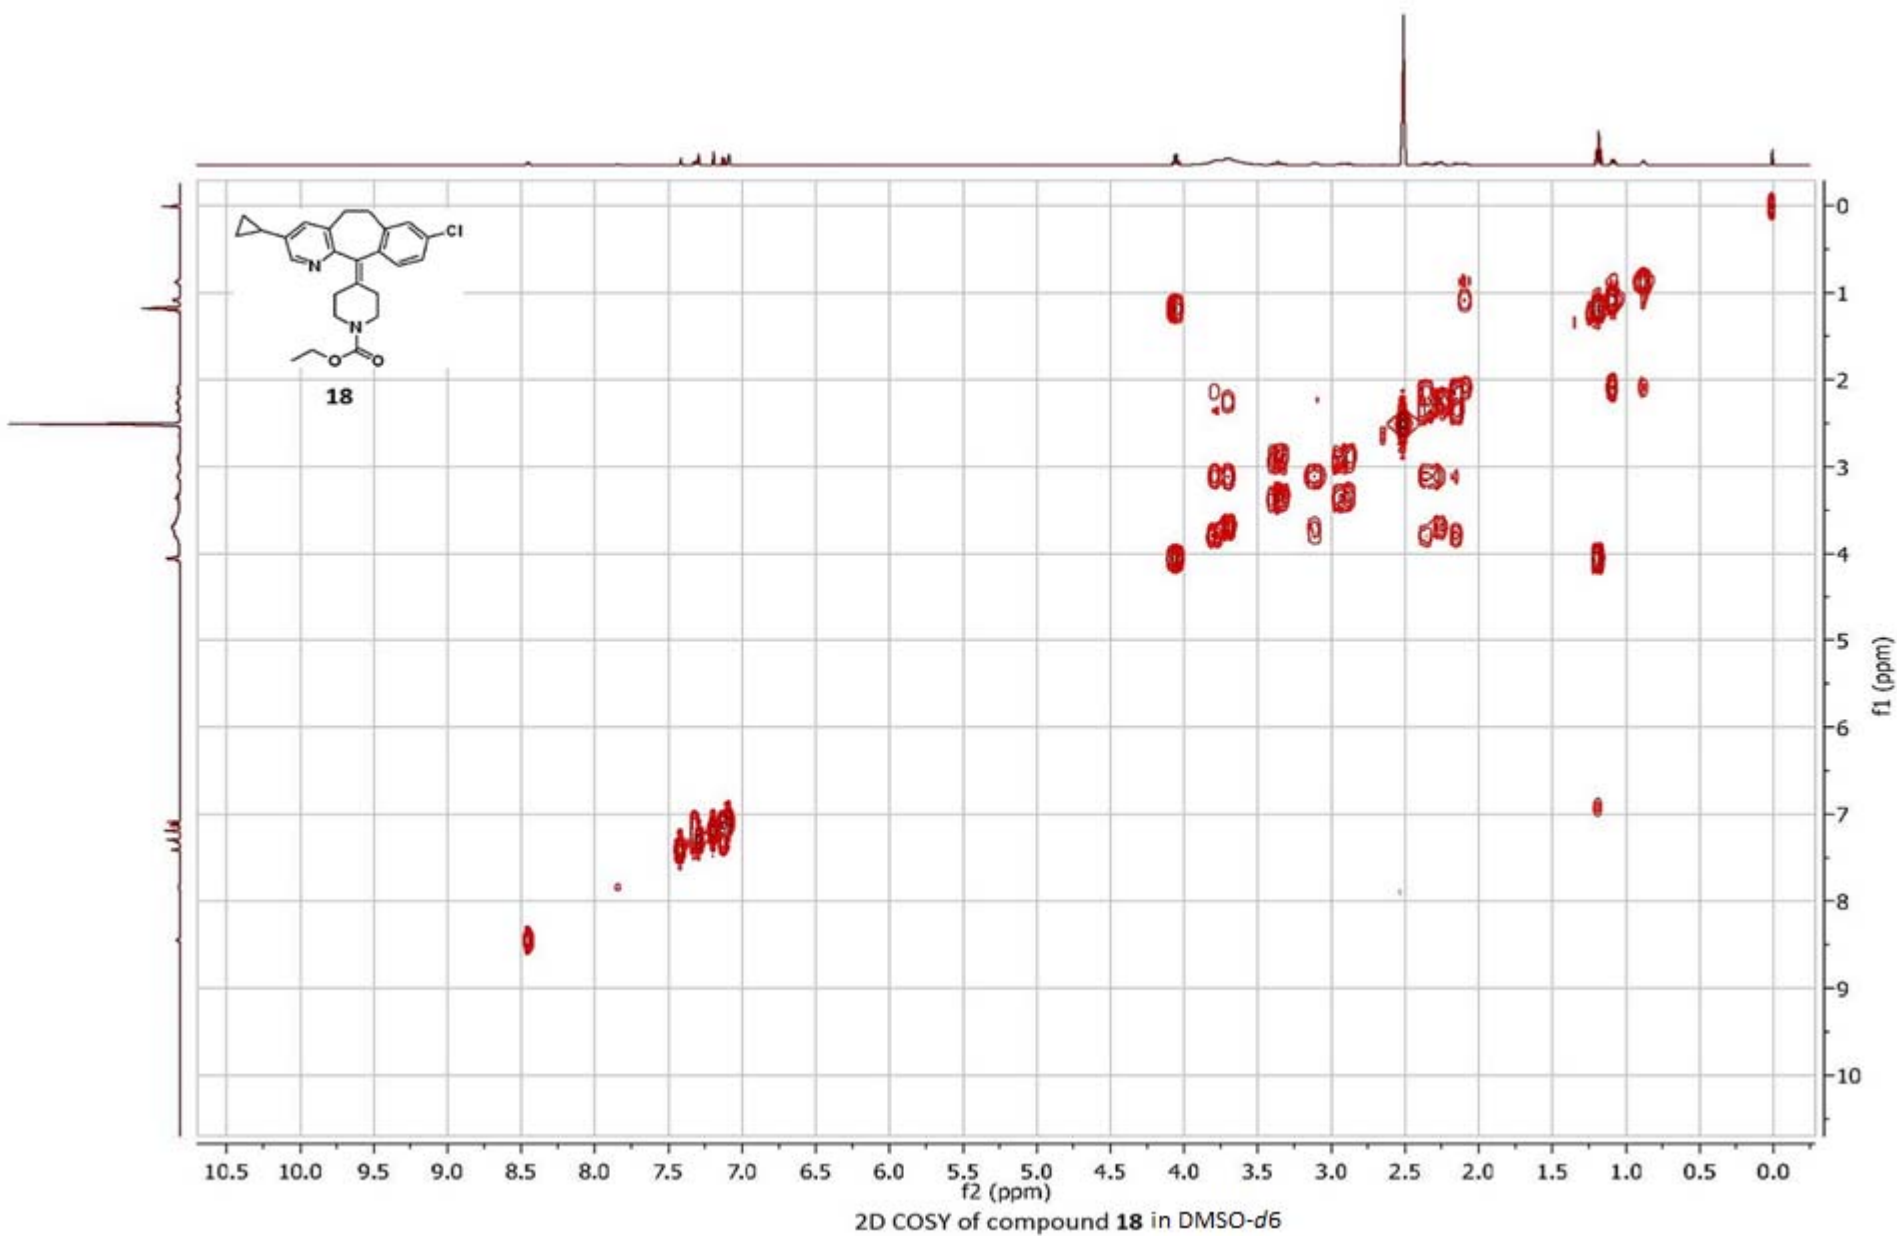

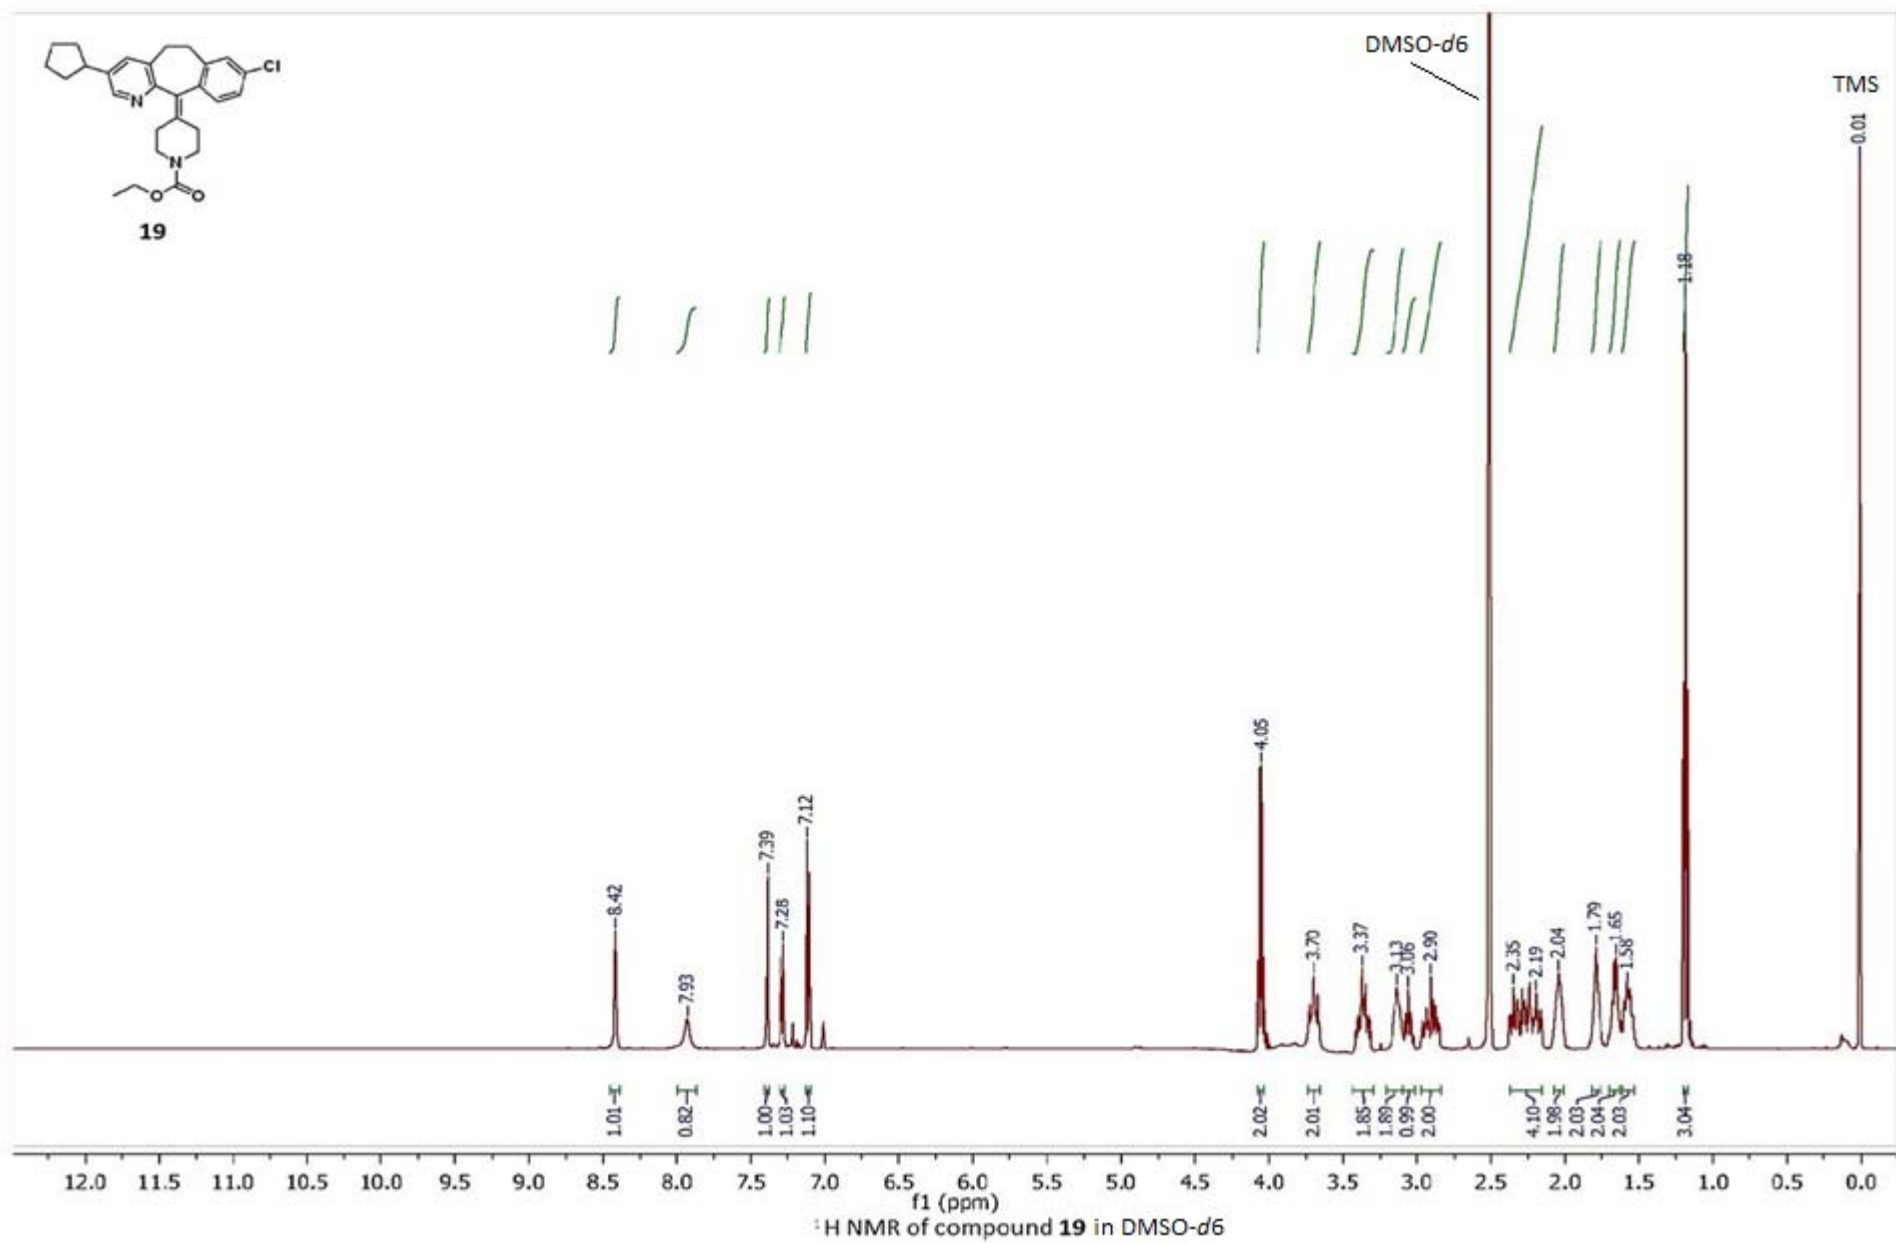

S100

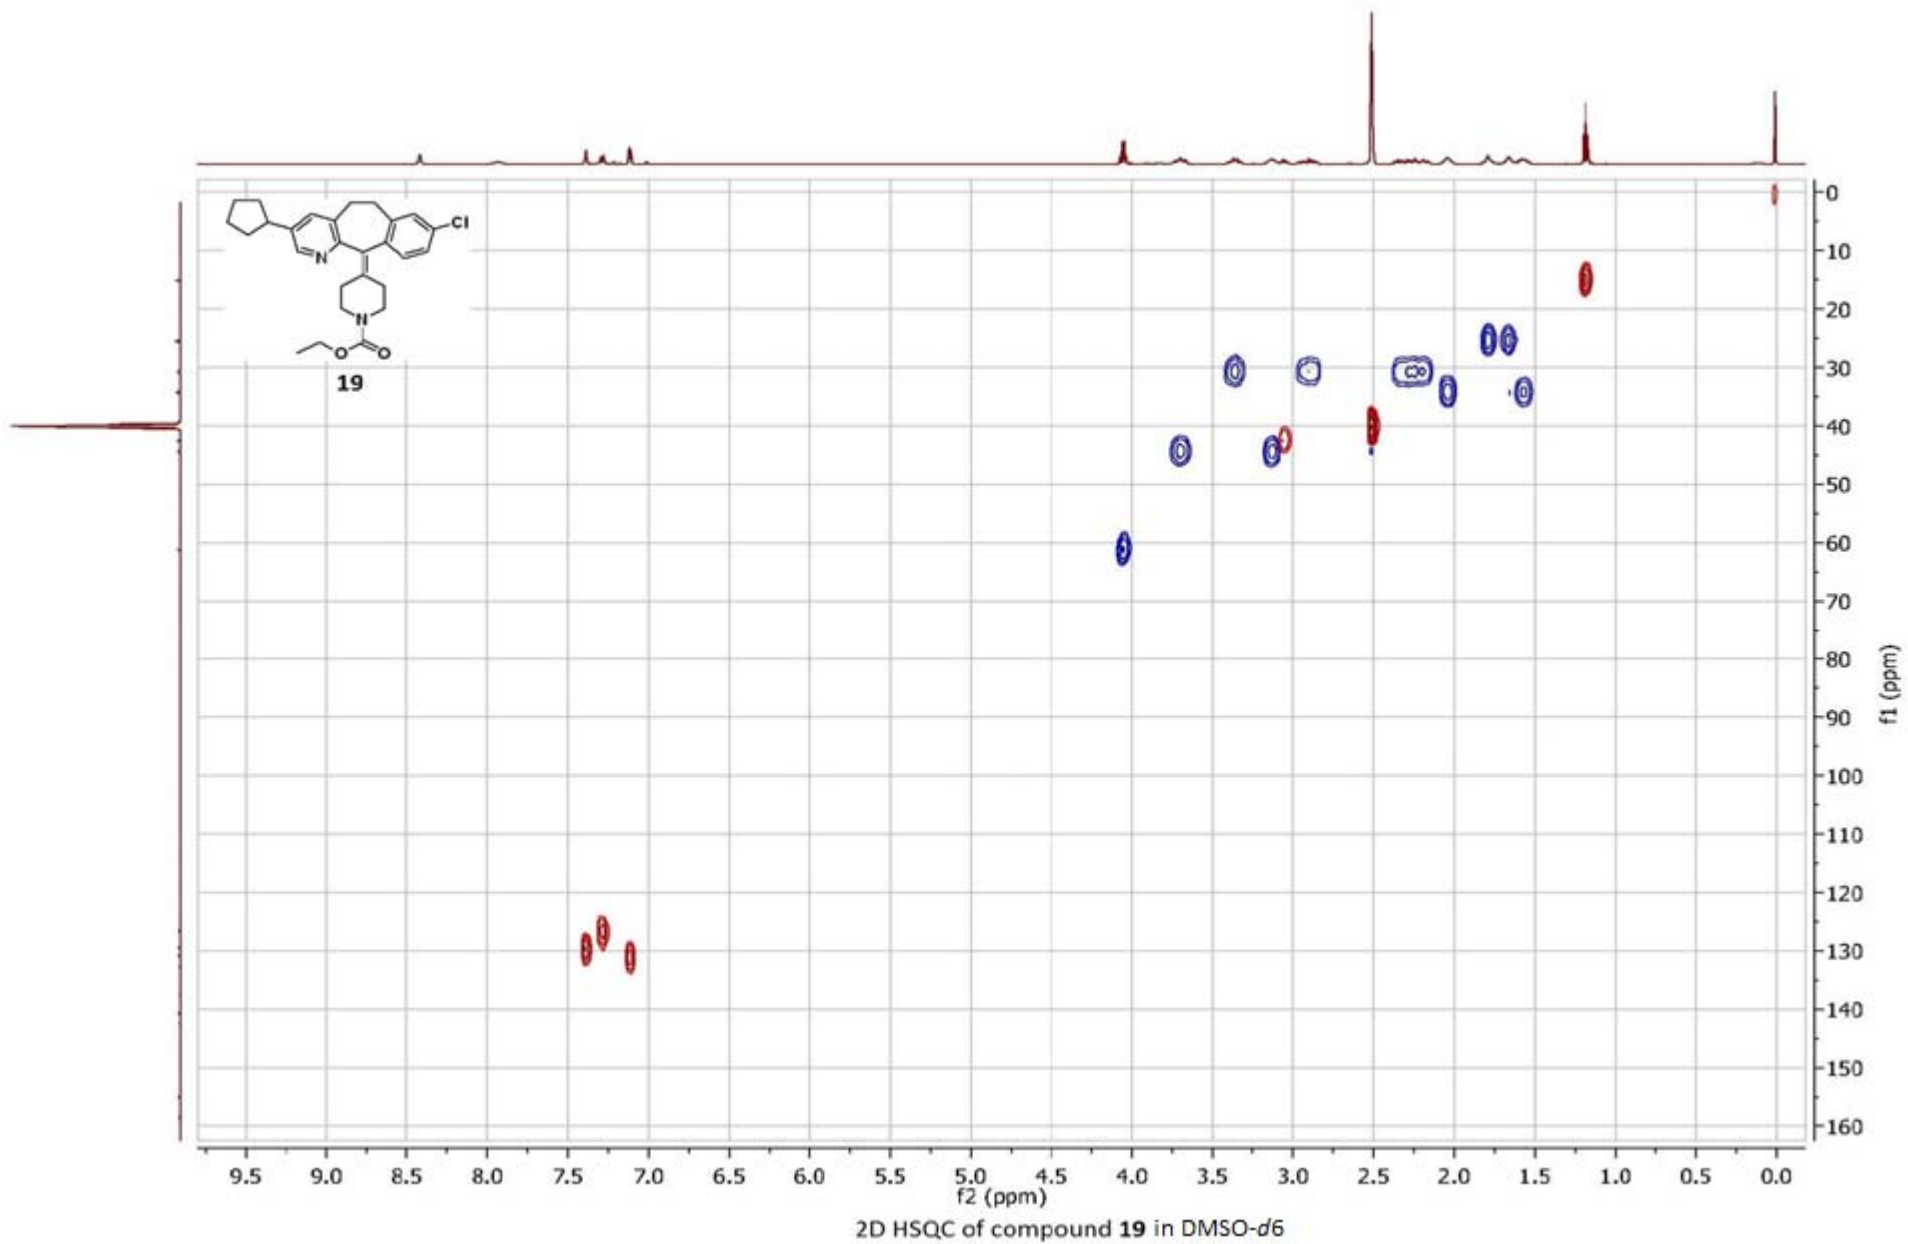

S101

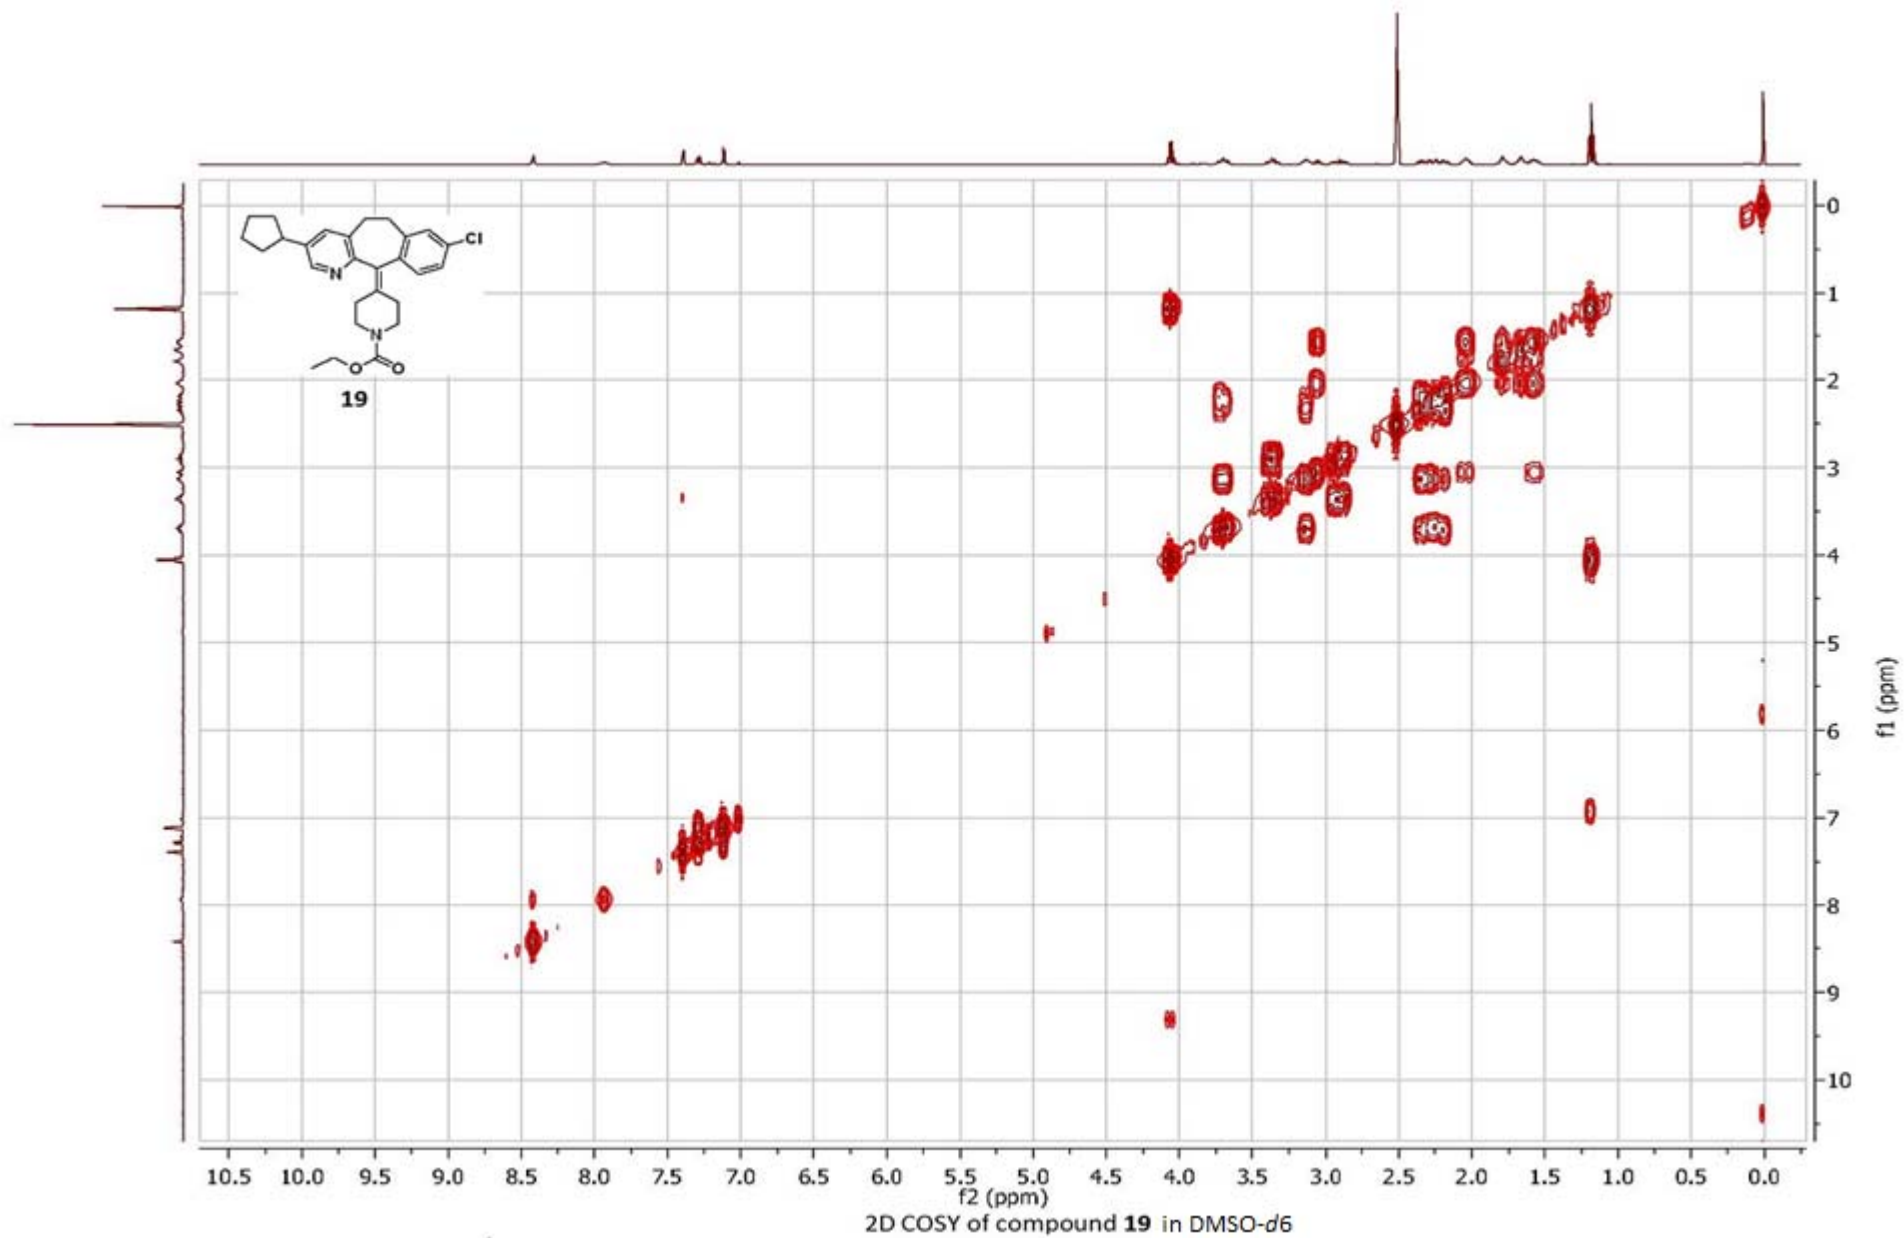

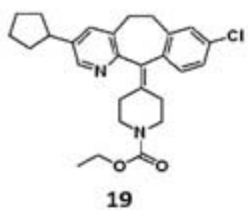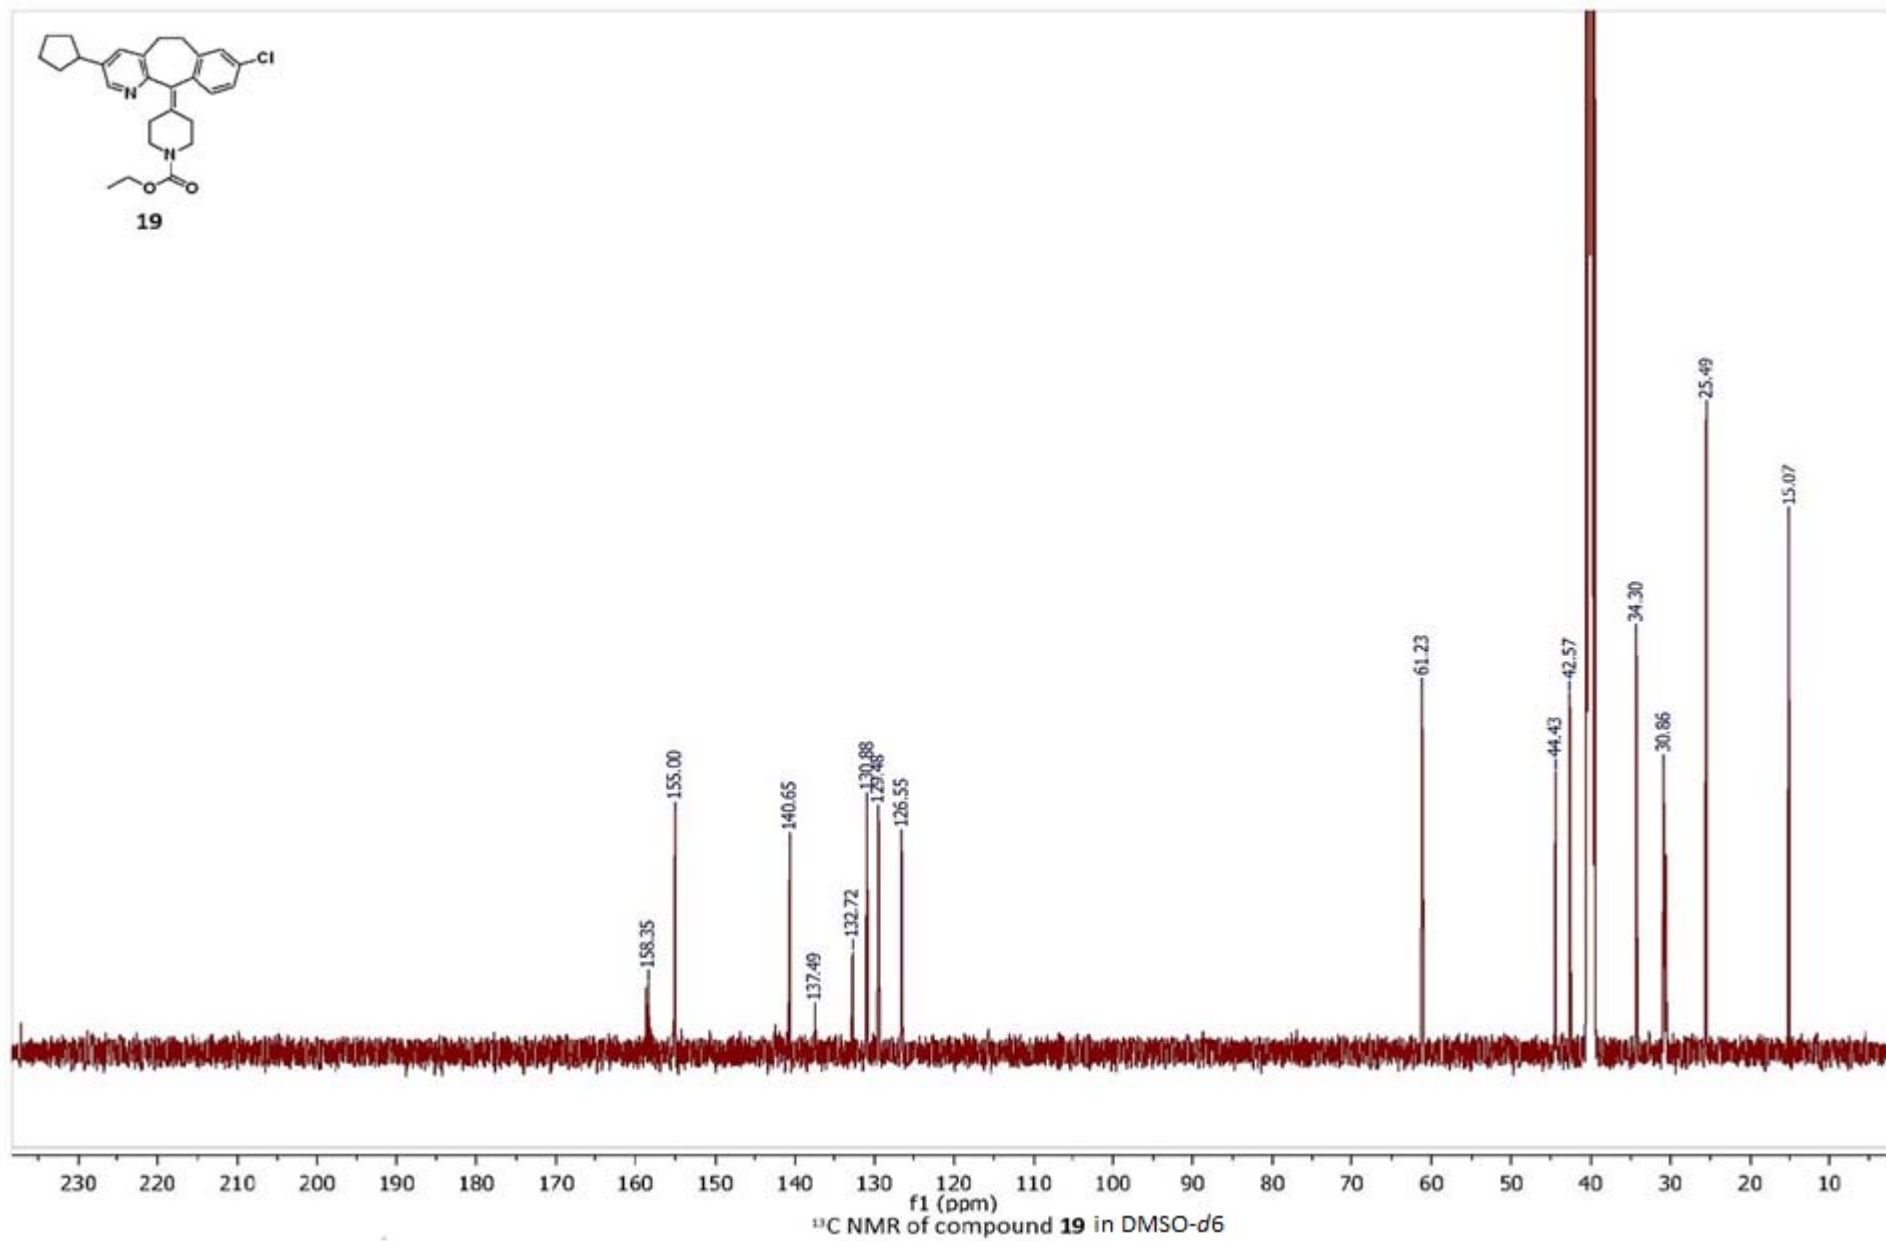

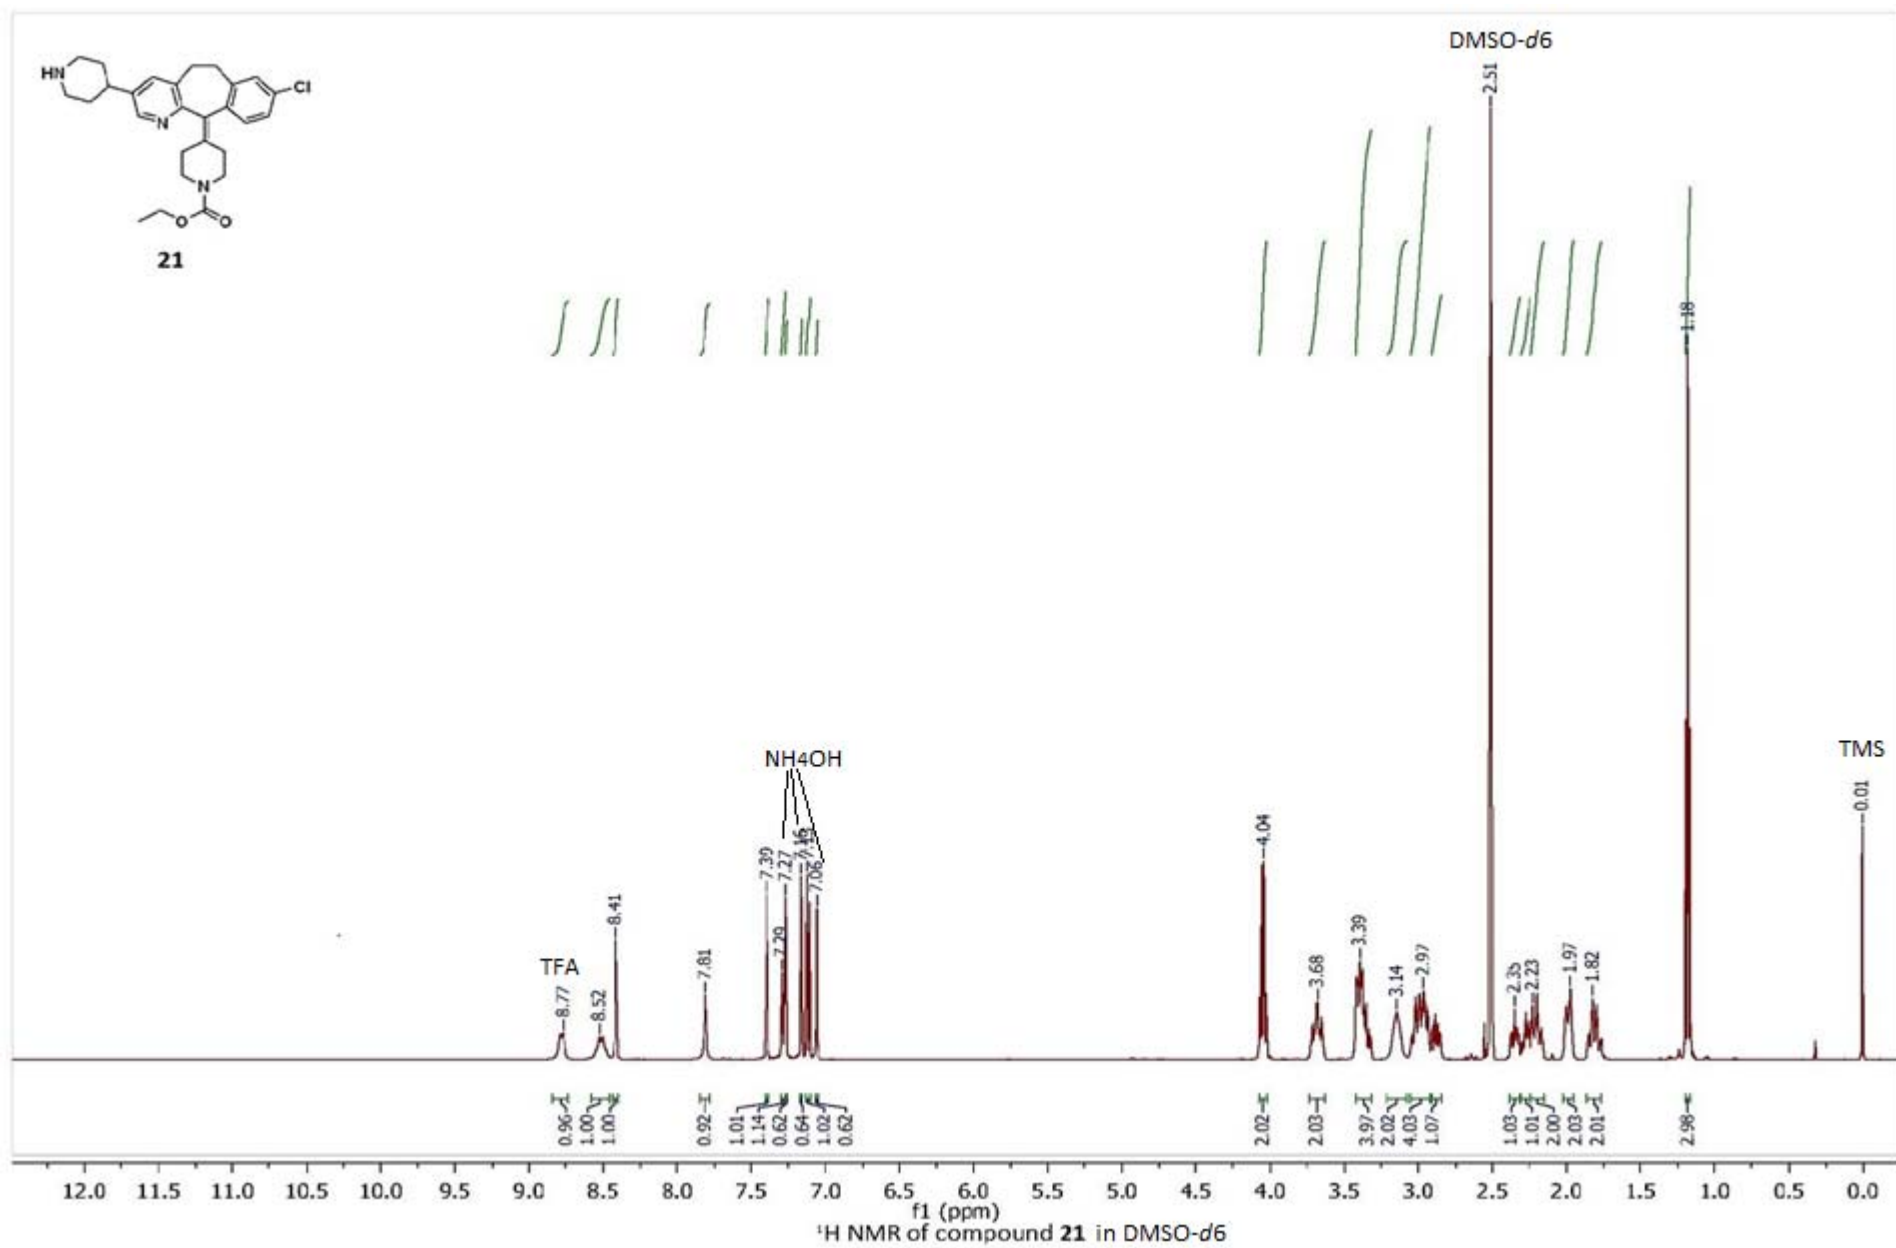



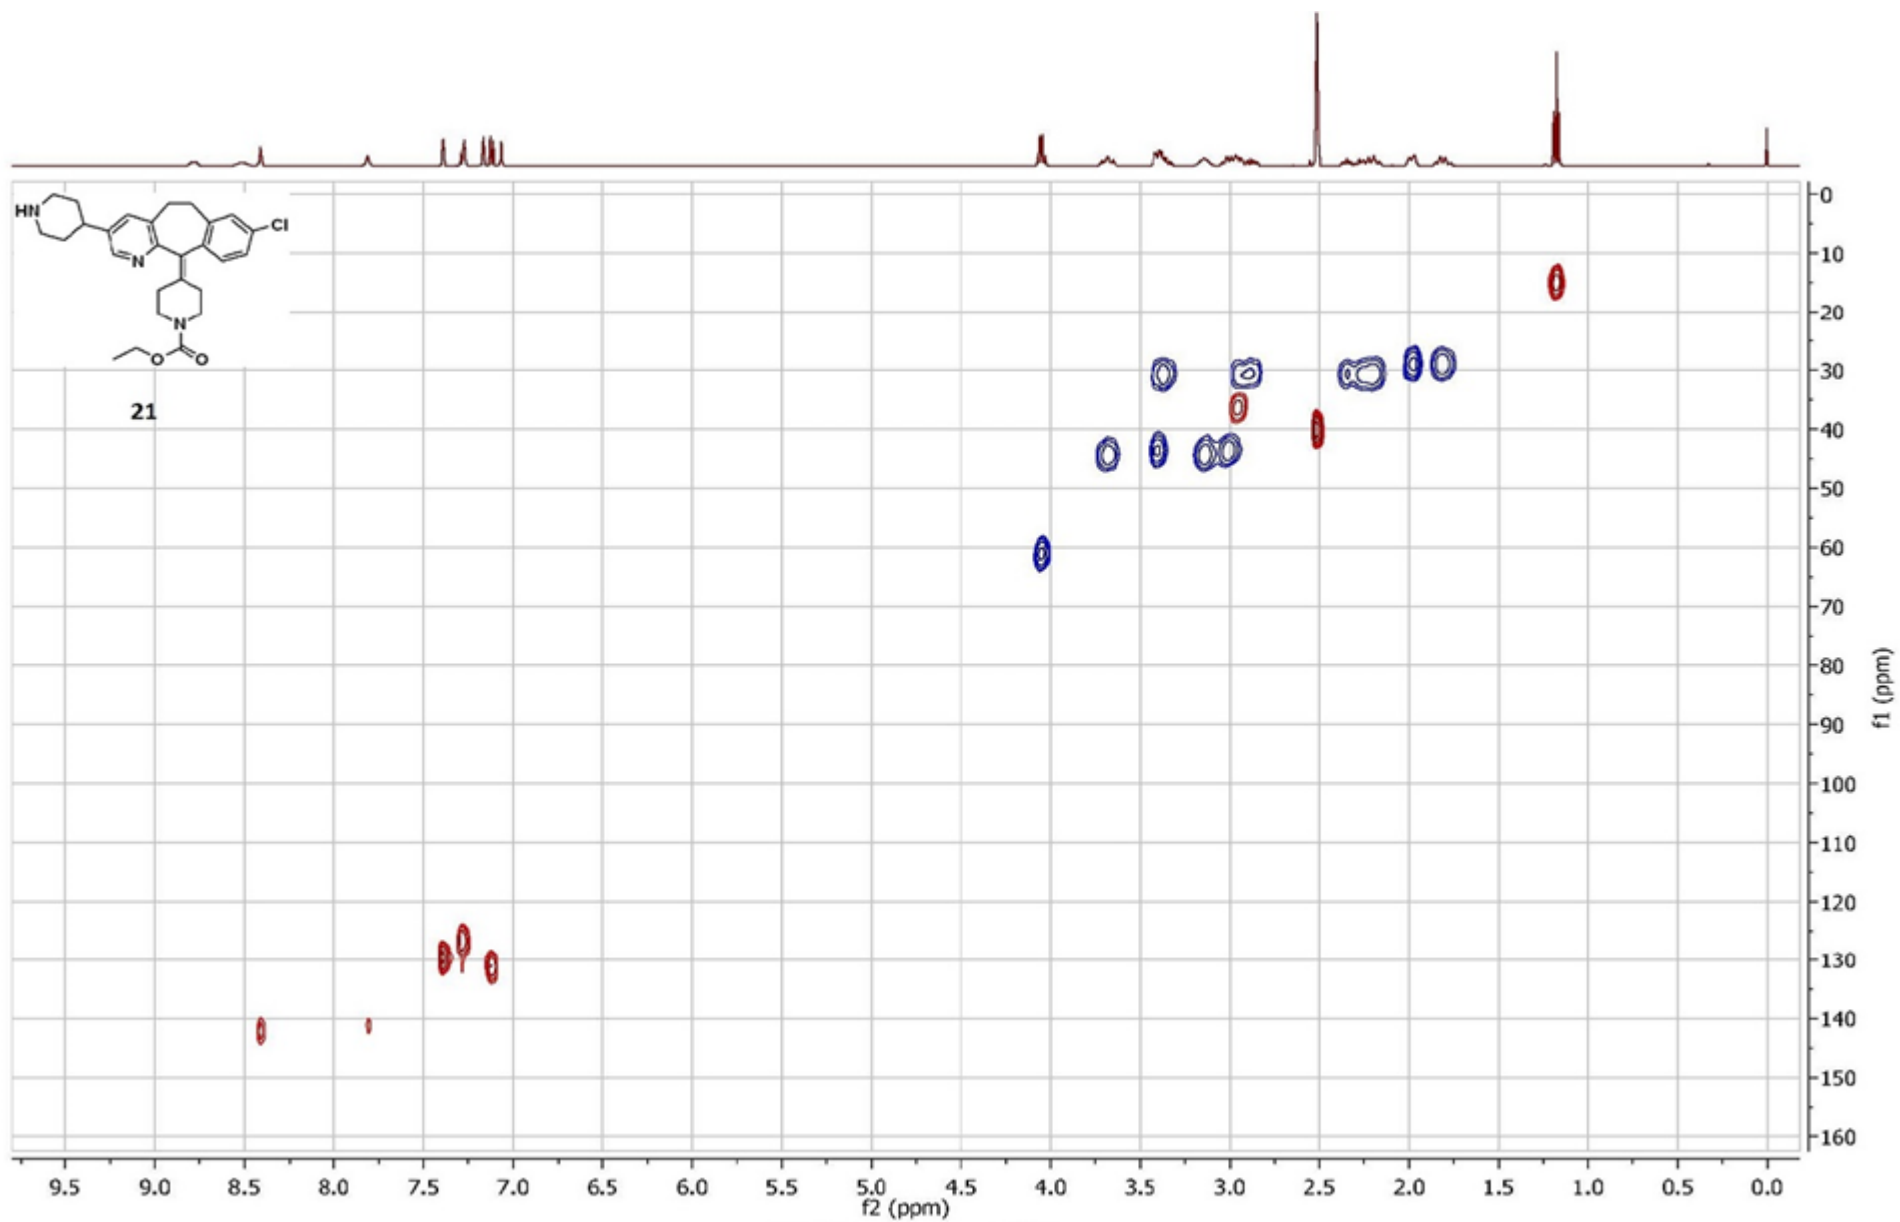

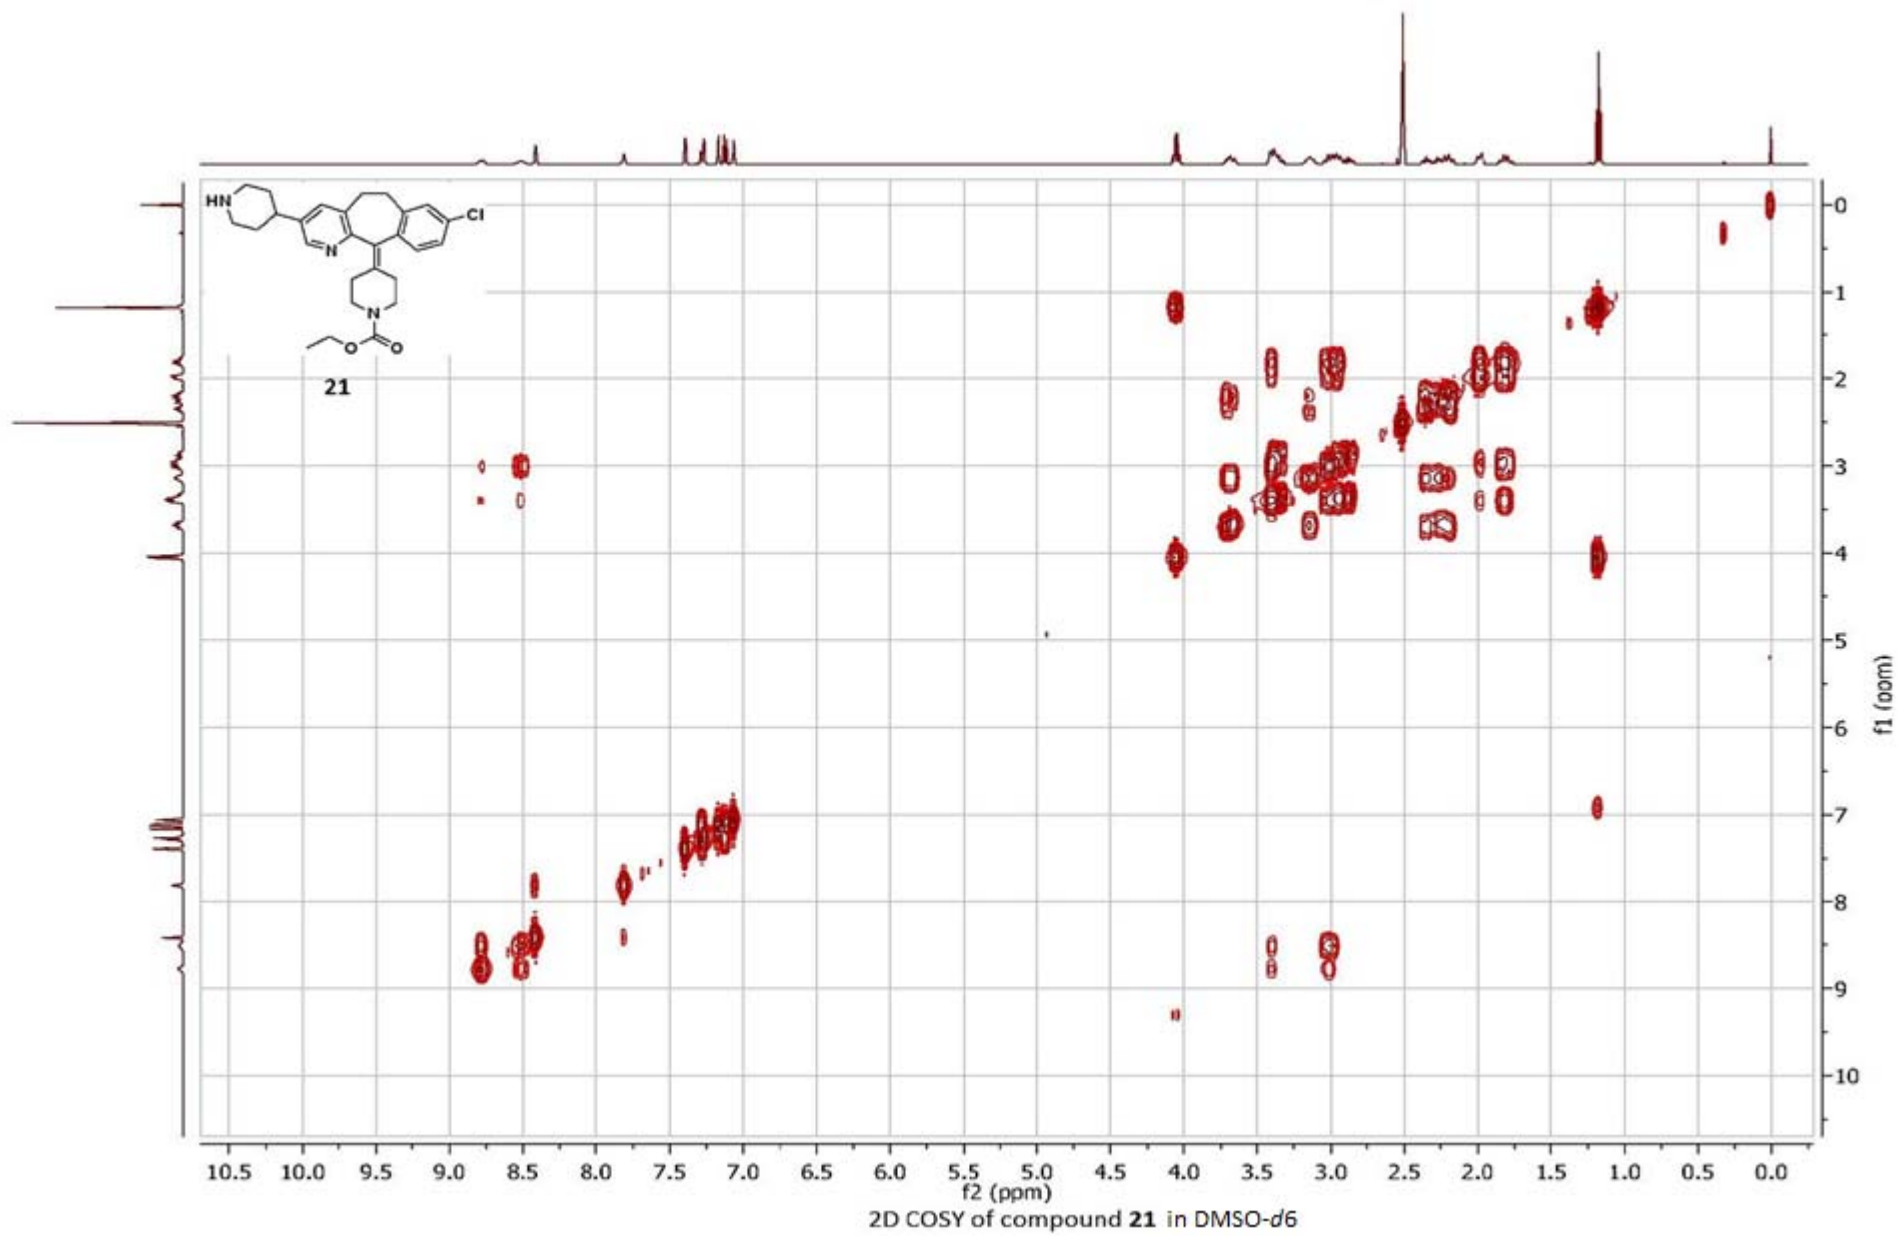

S106

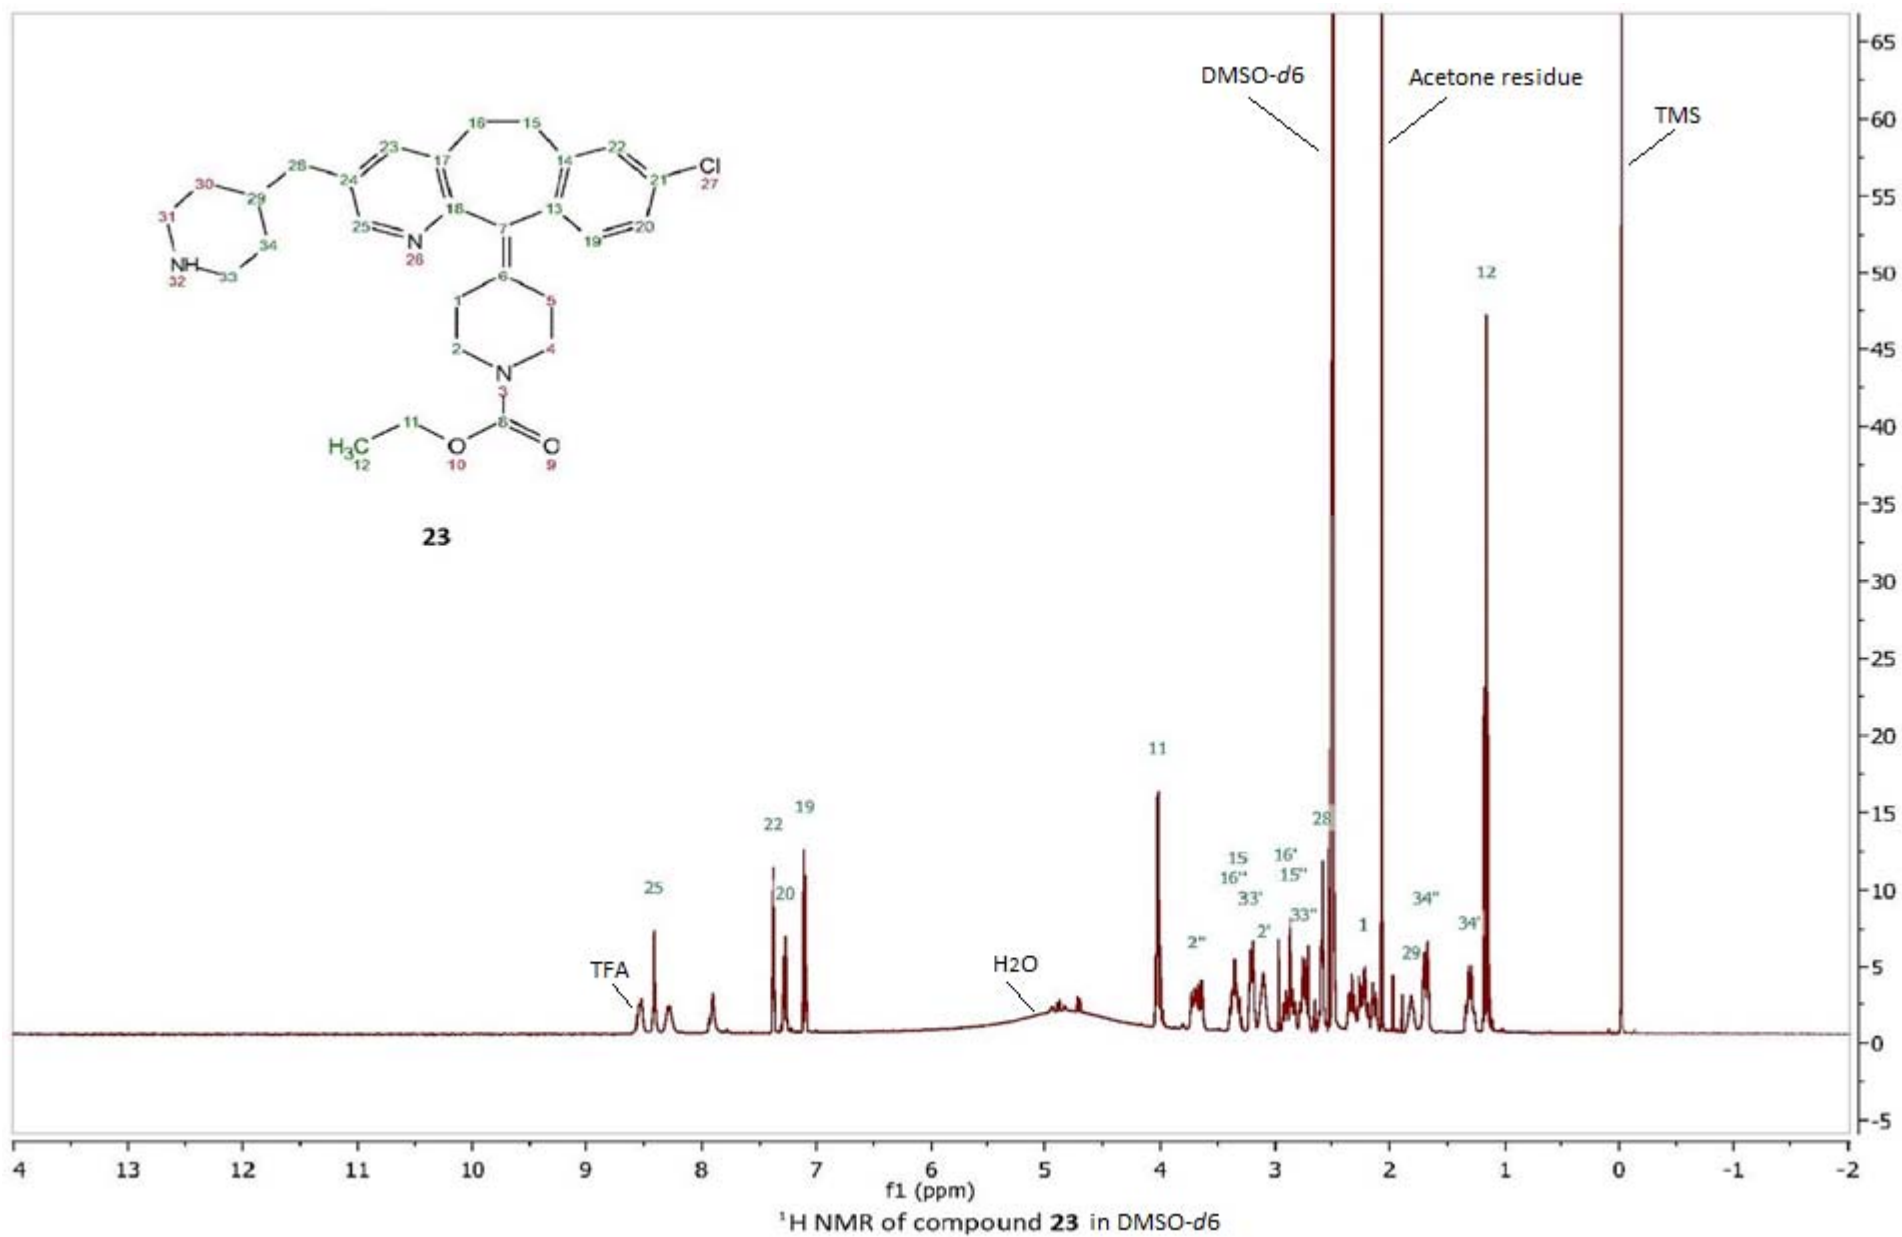

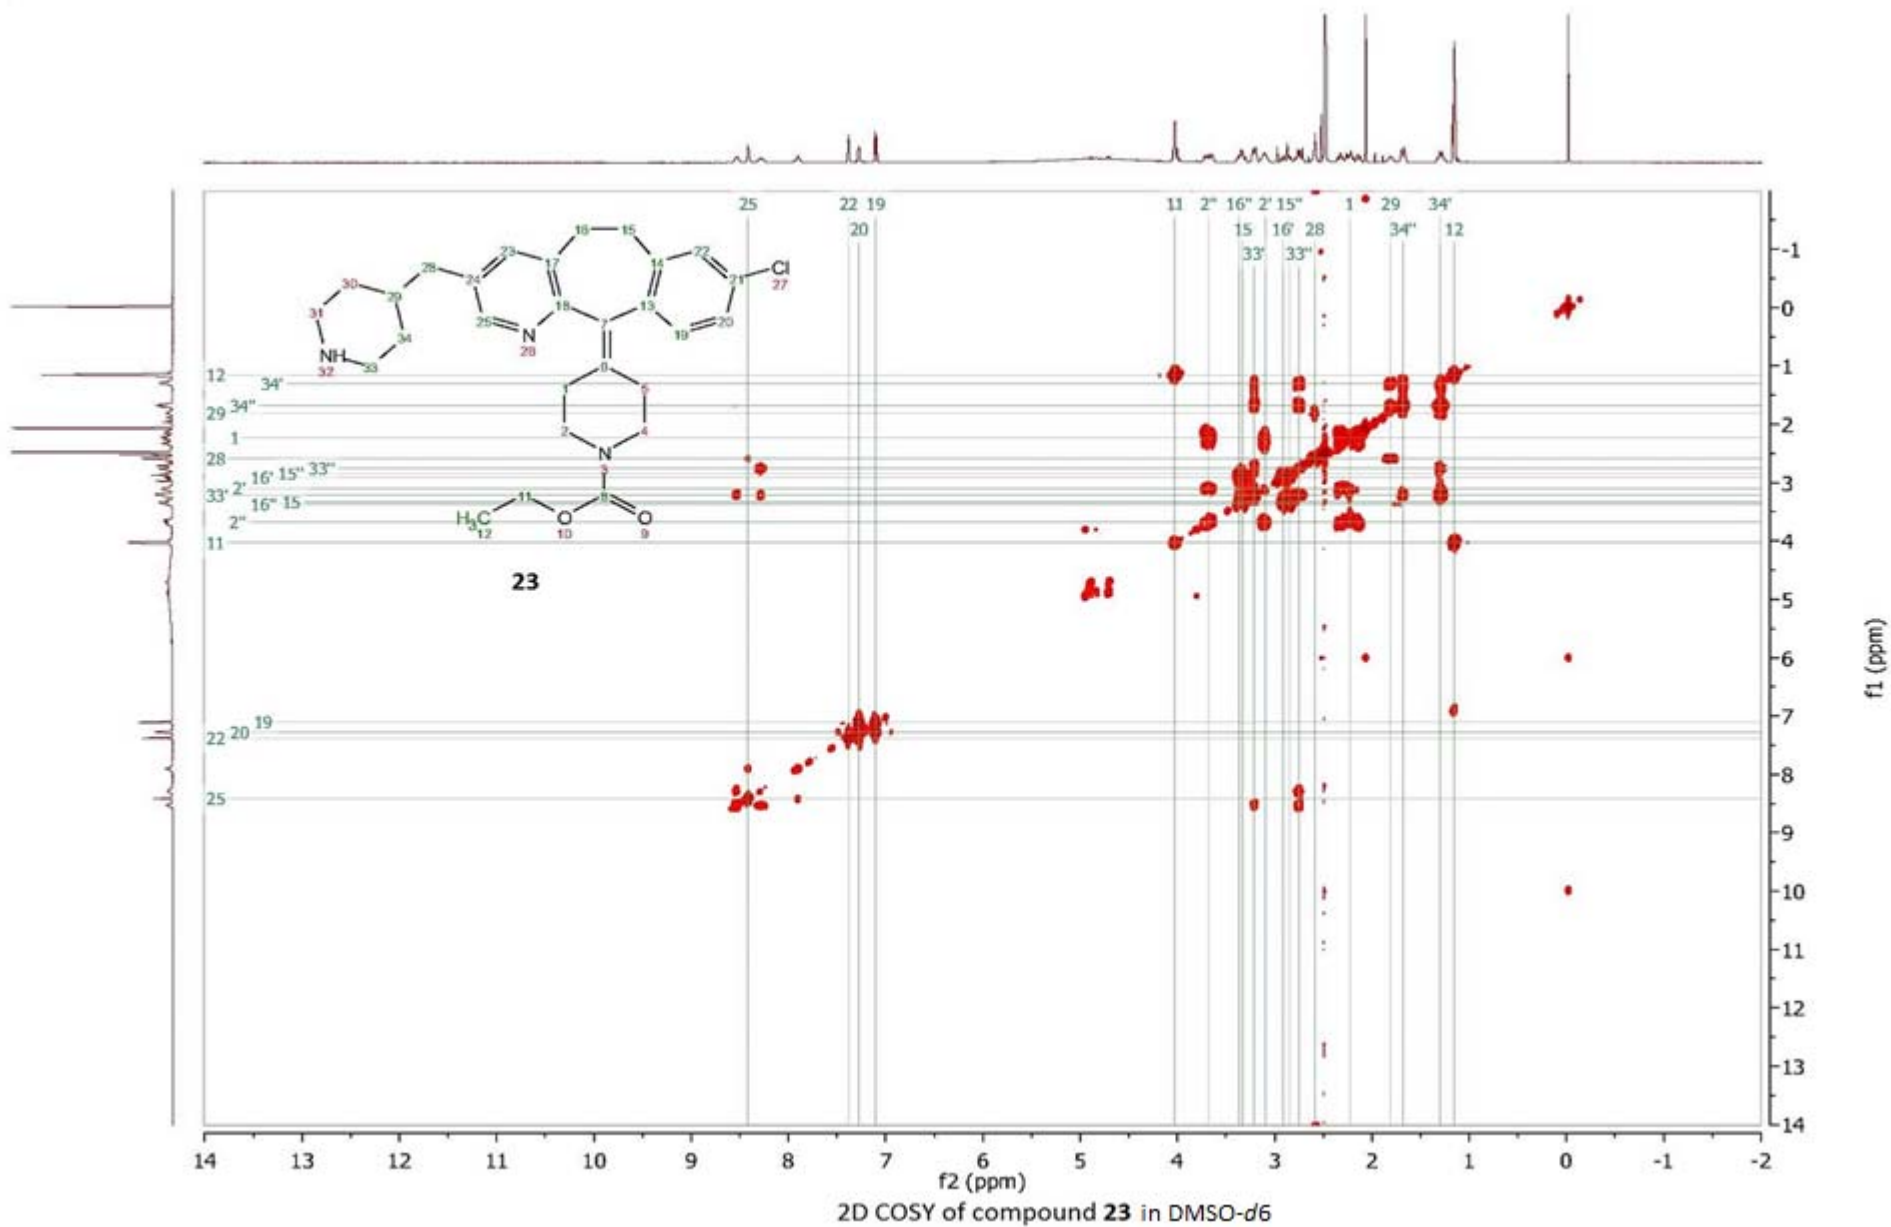

S108

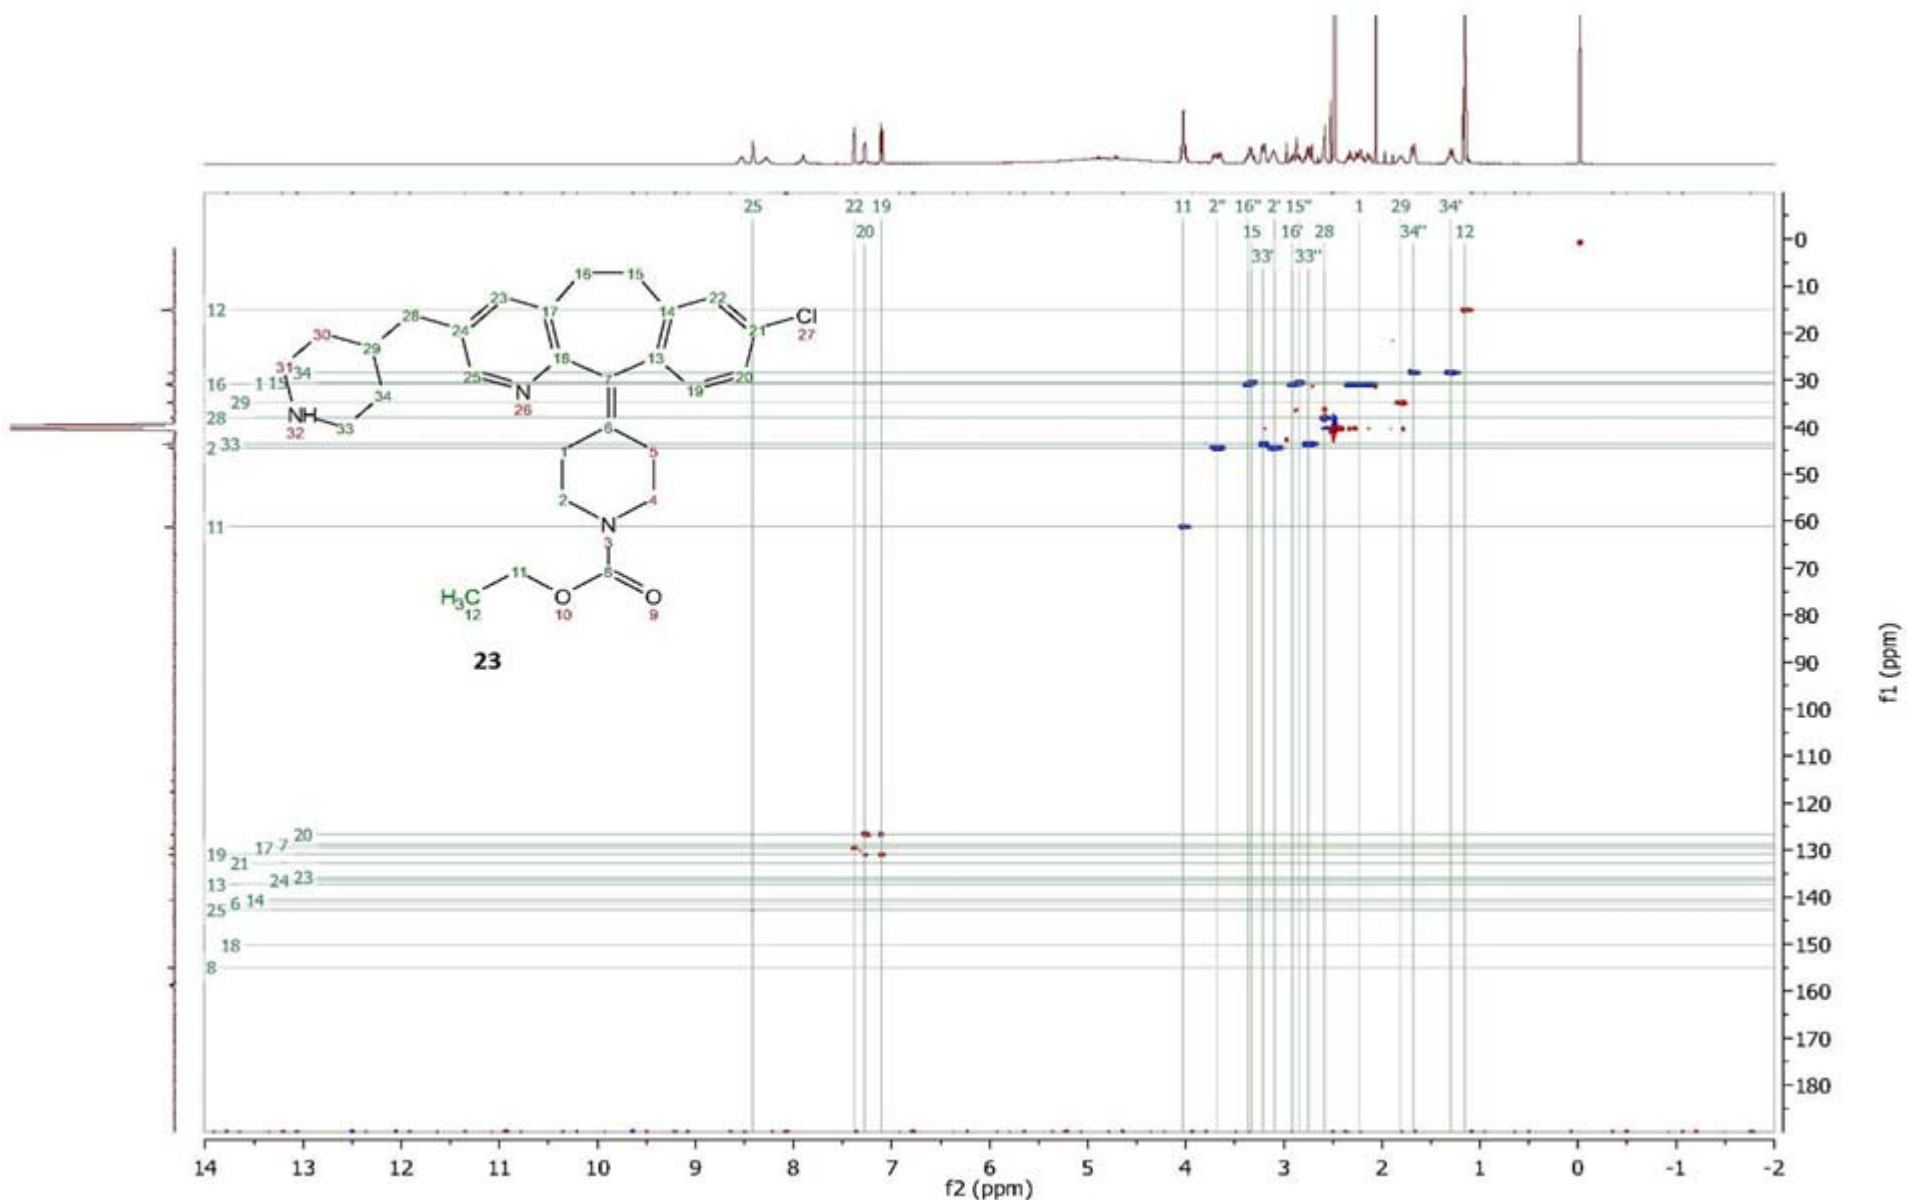

S109

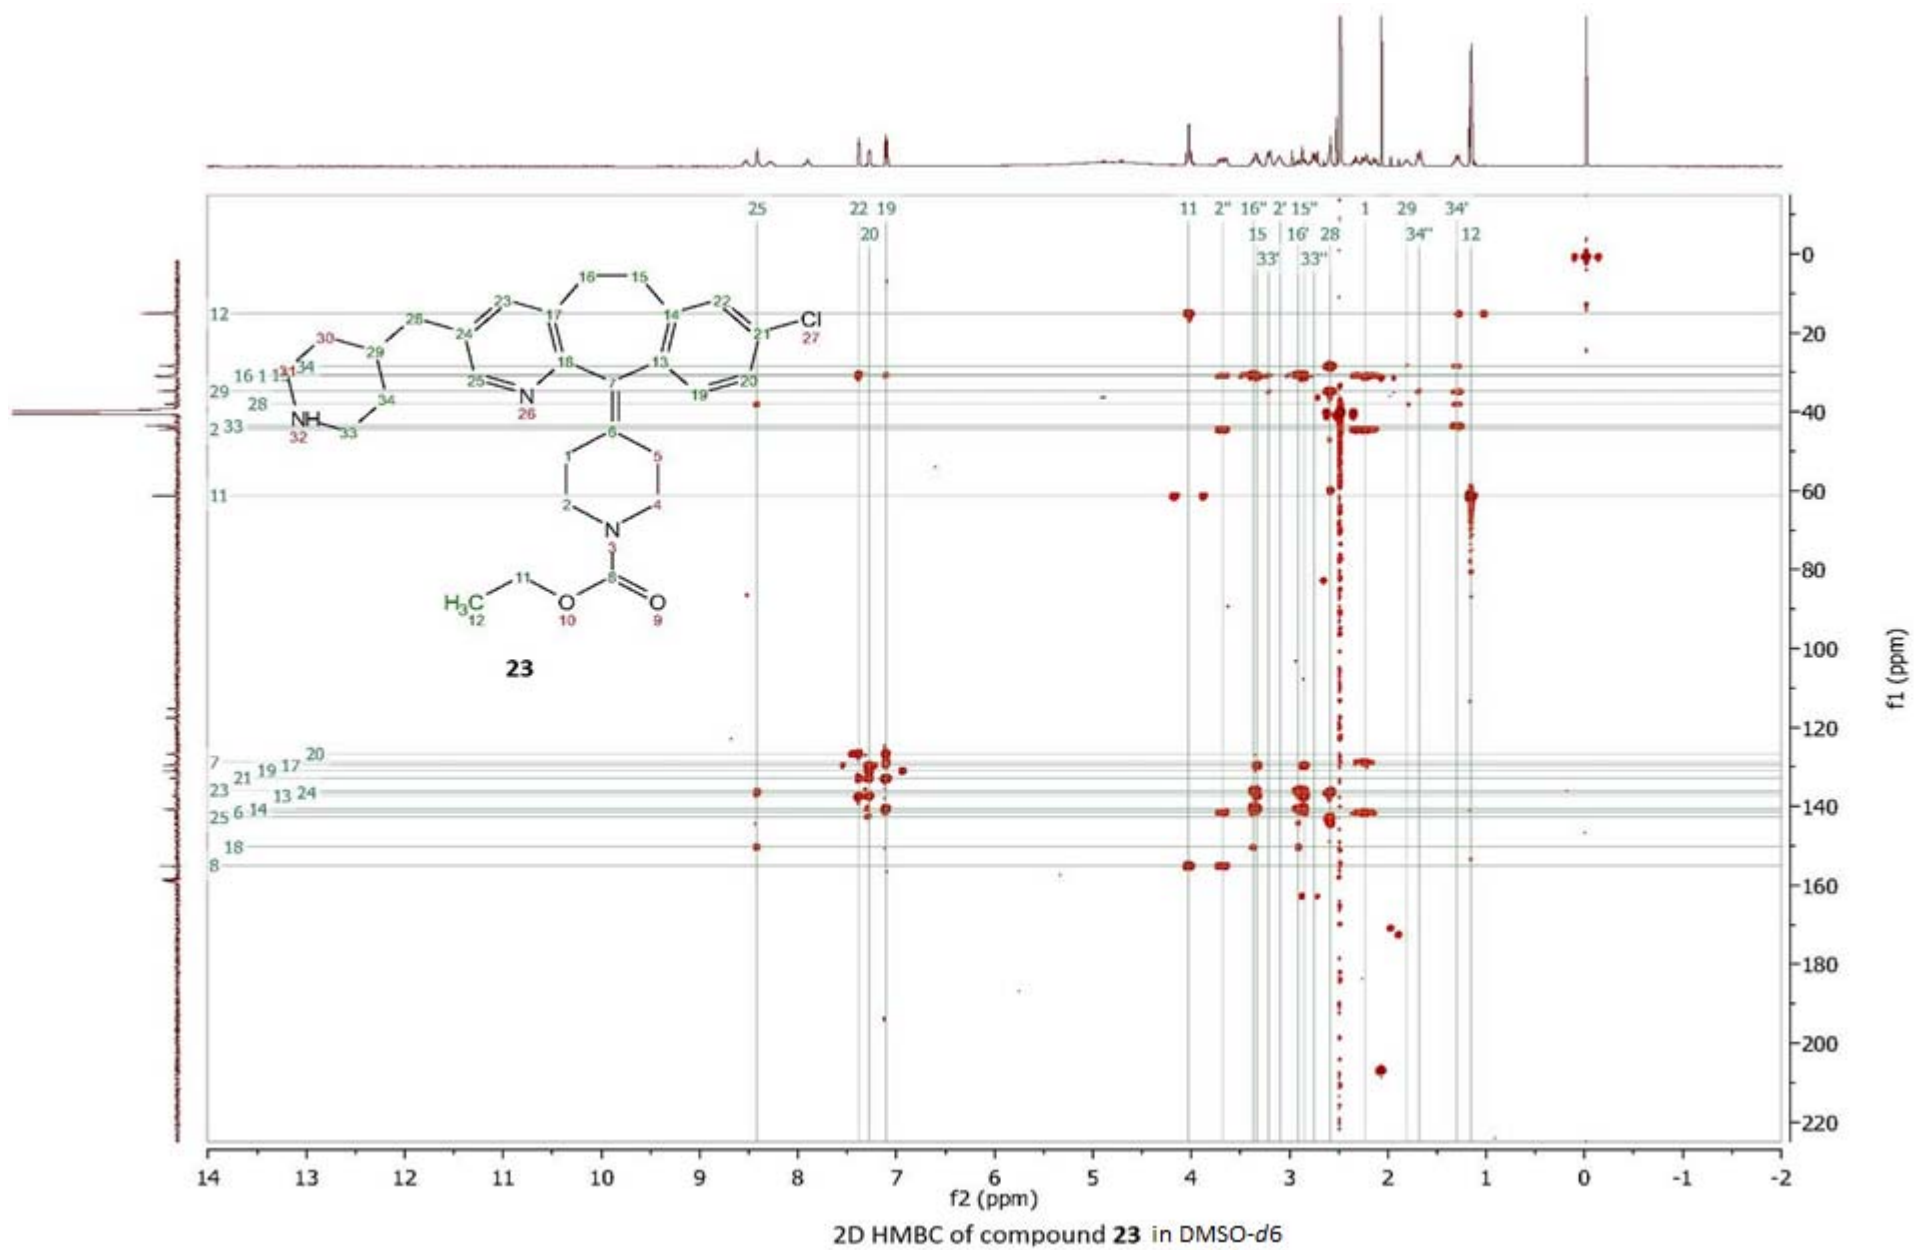

S110

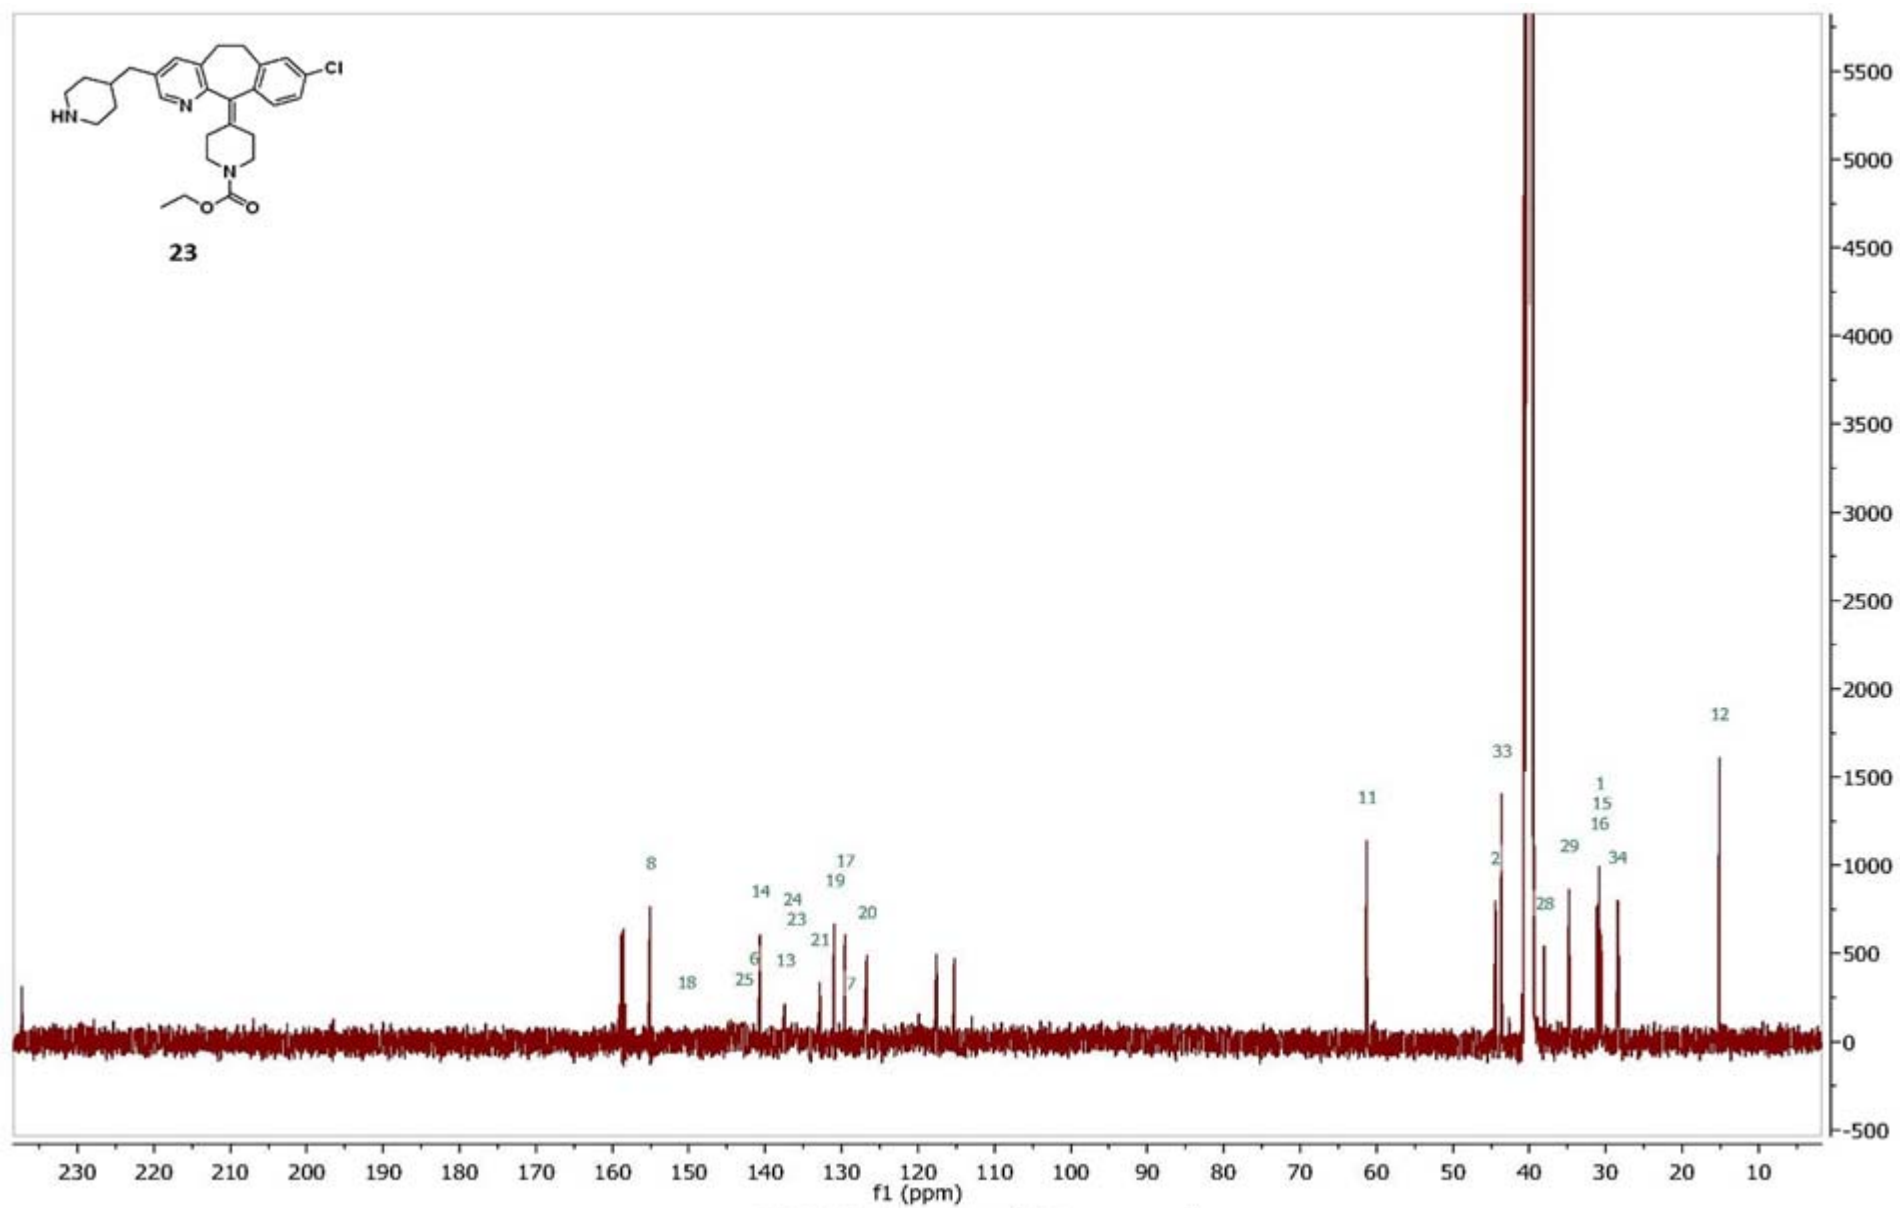

<sup>13</sup>C NMR of compound 23 in DMSO-d<sub>6</sub>





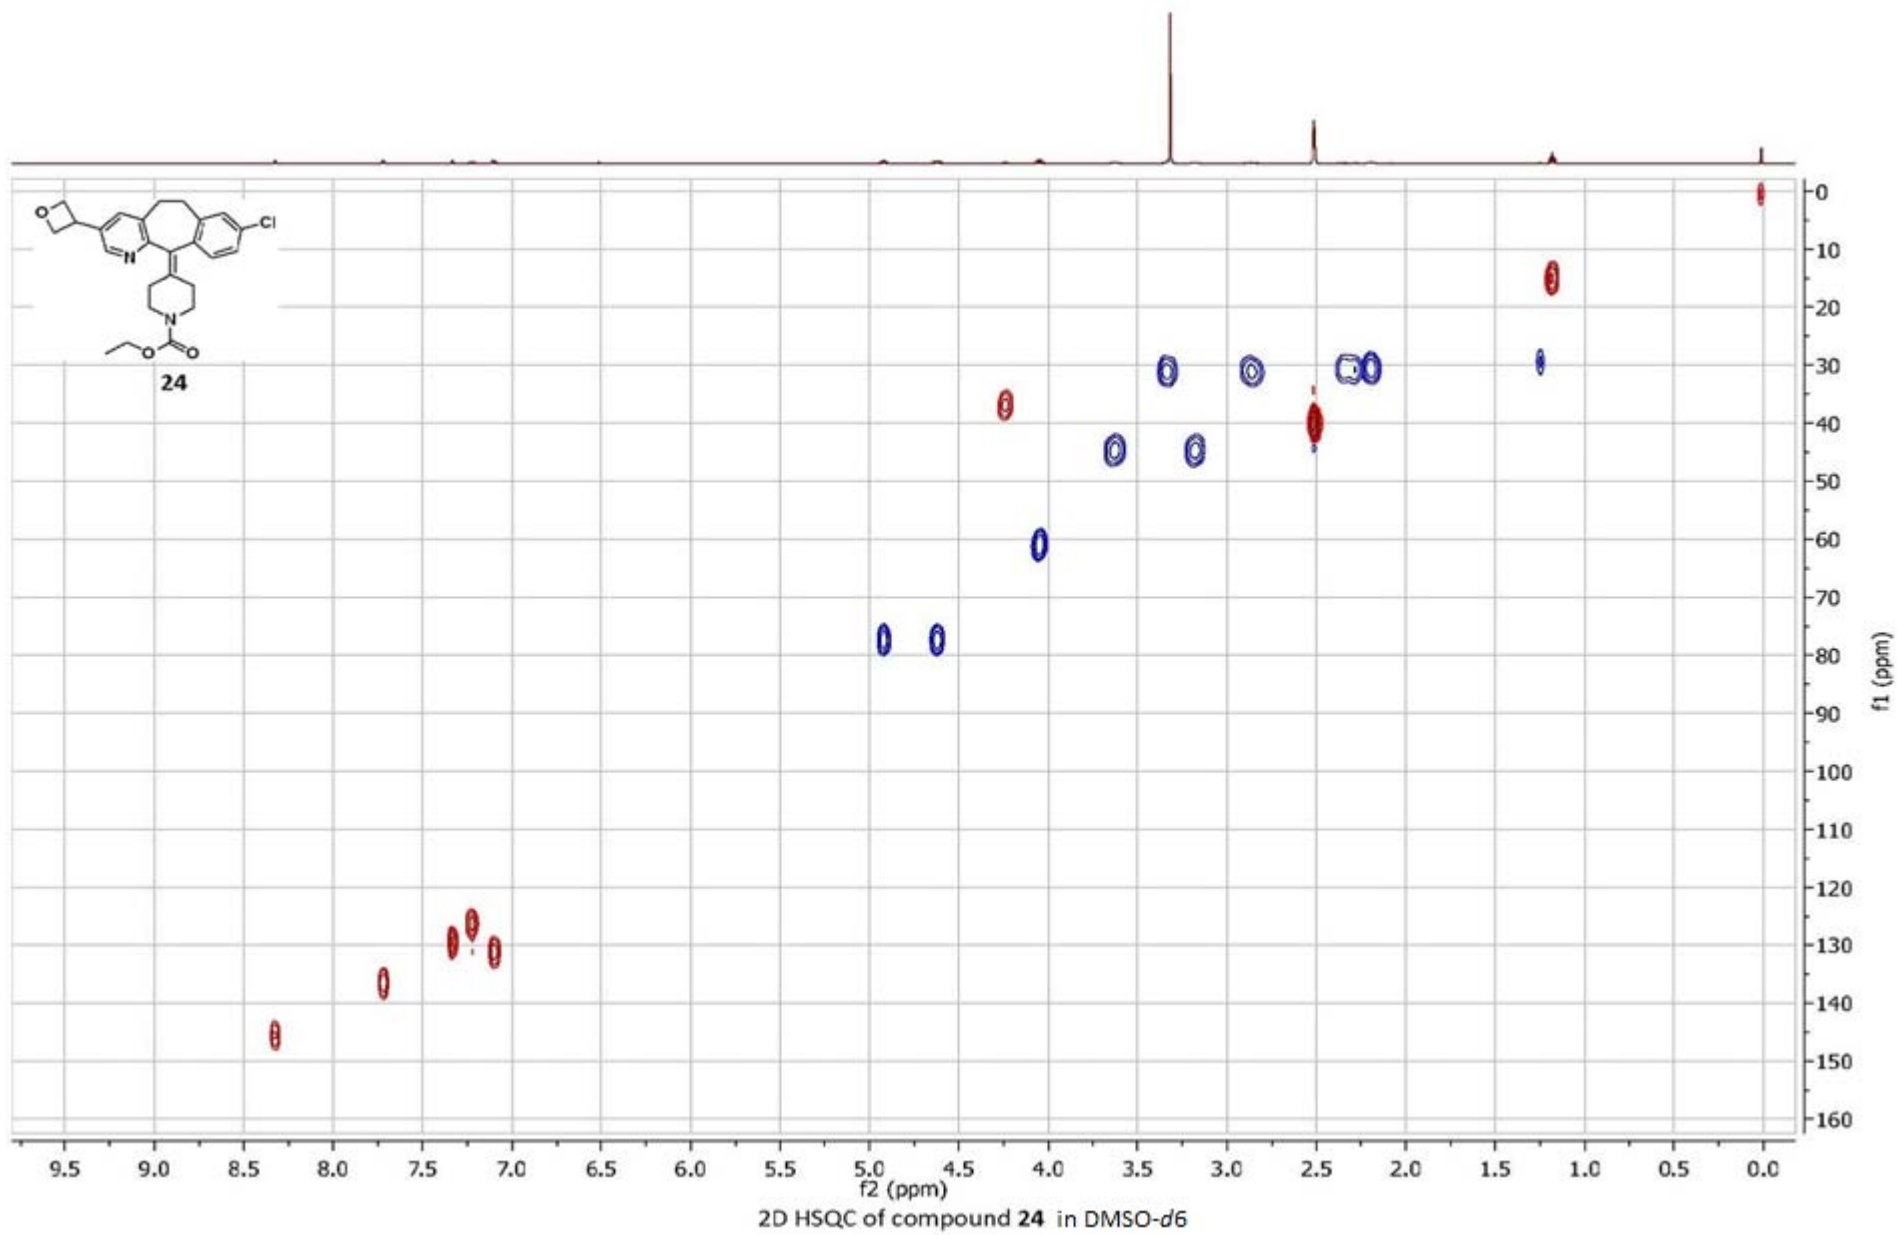

S113

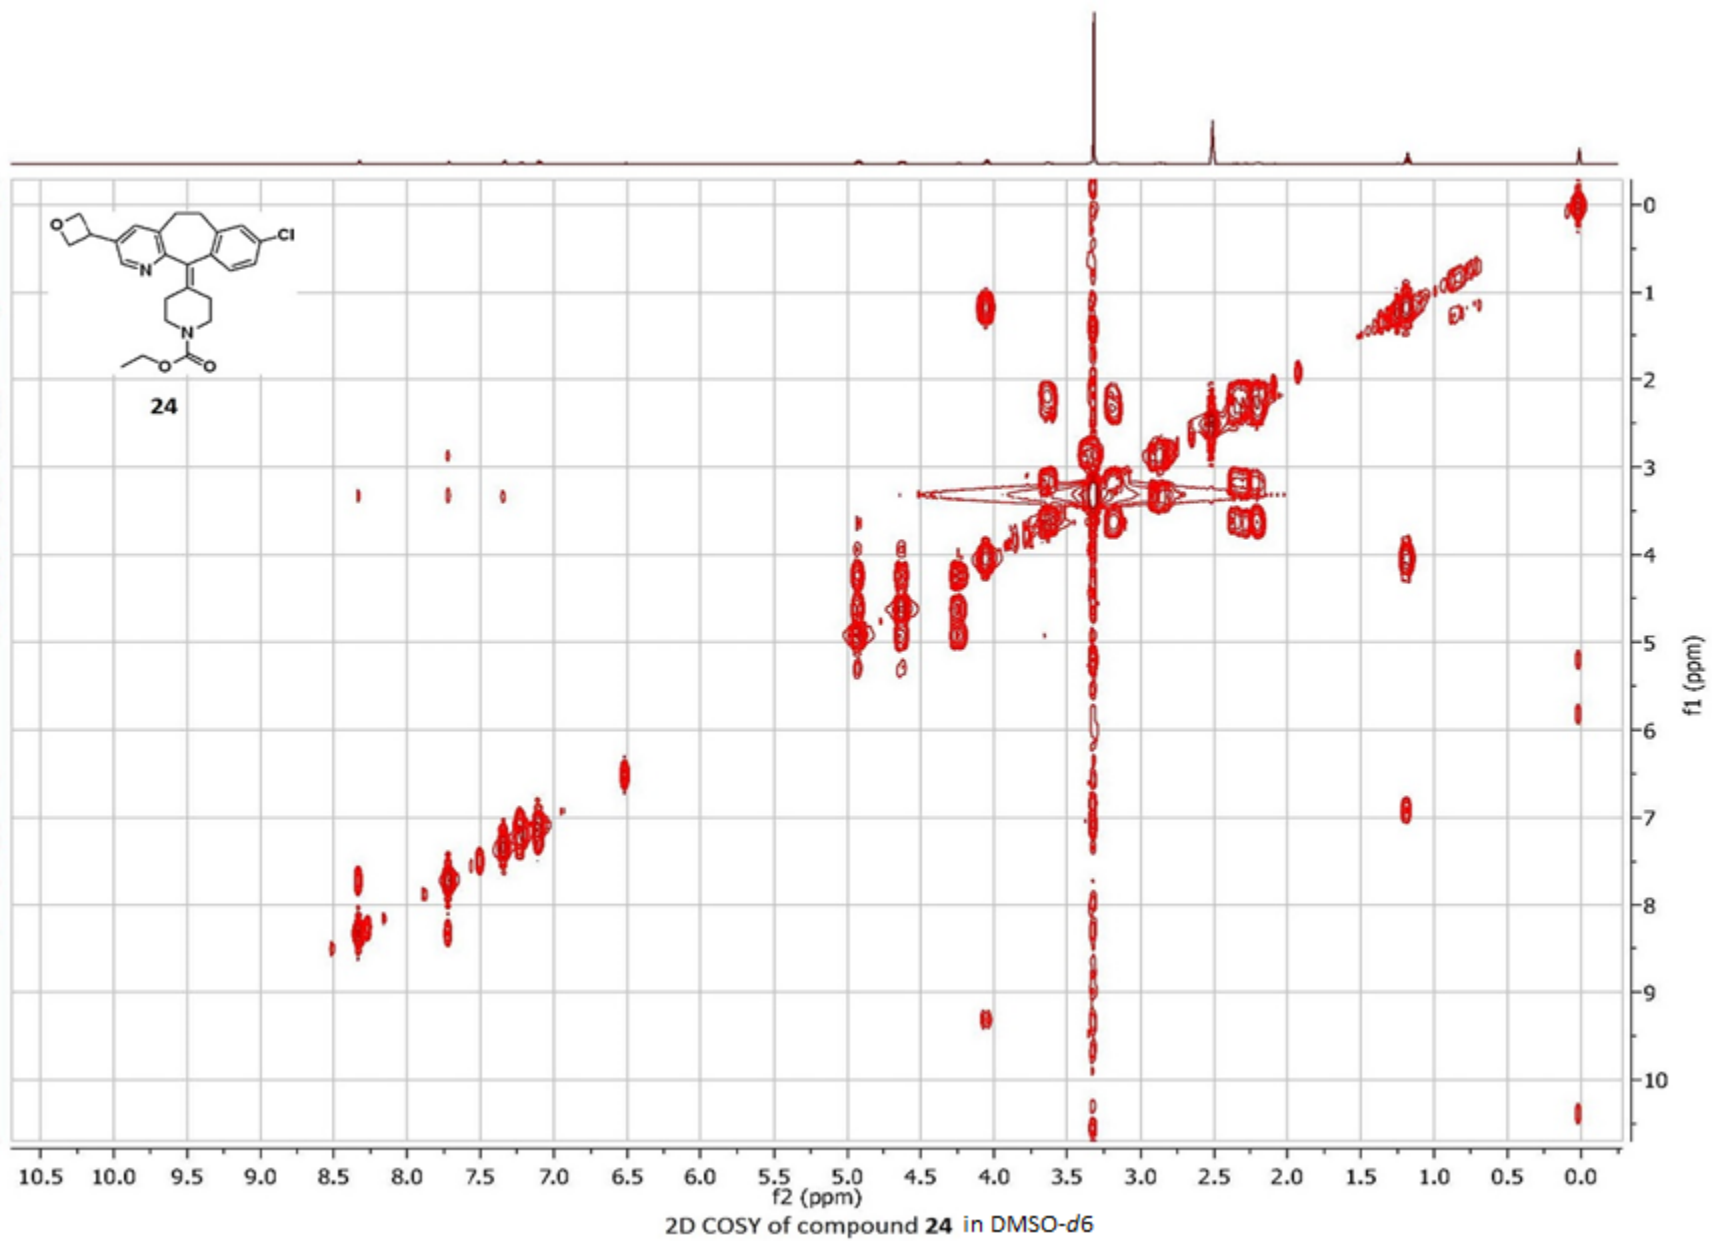

S114

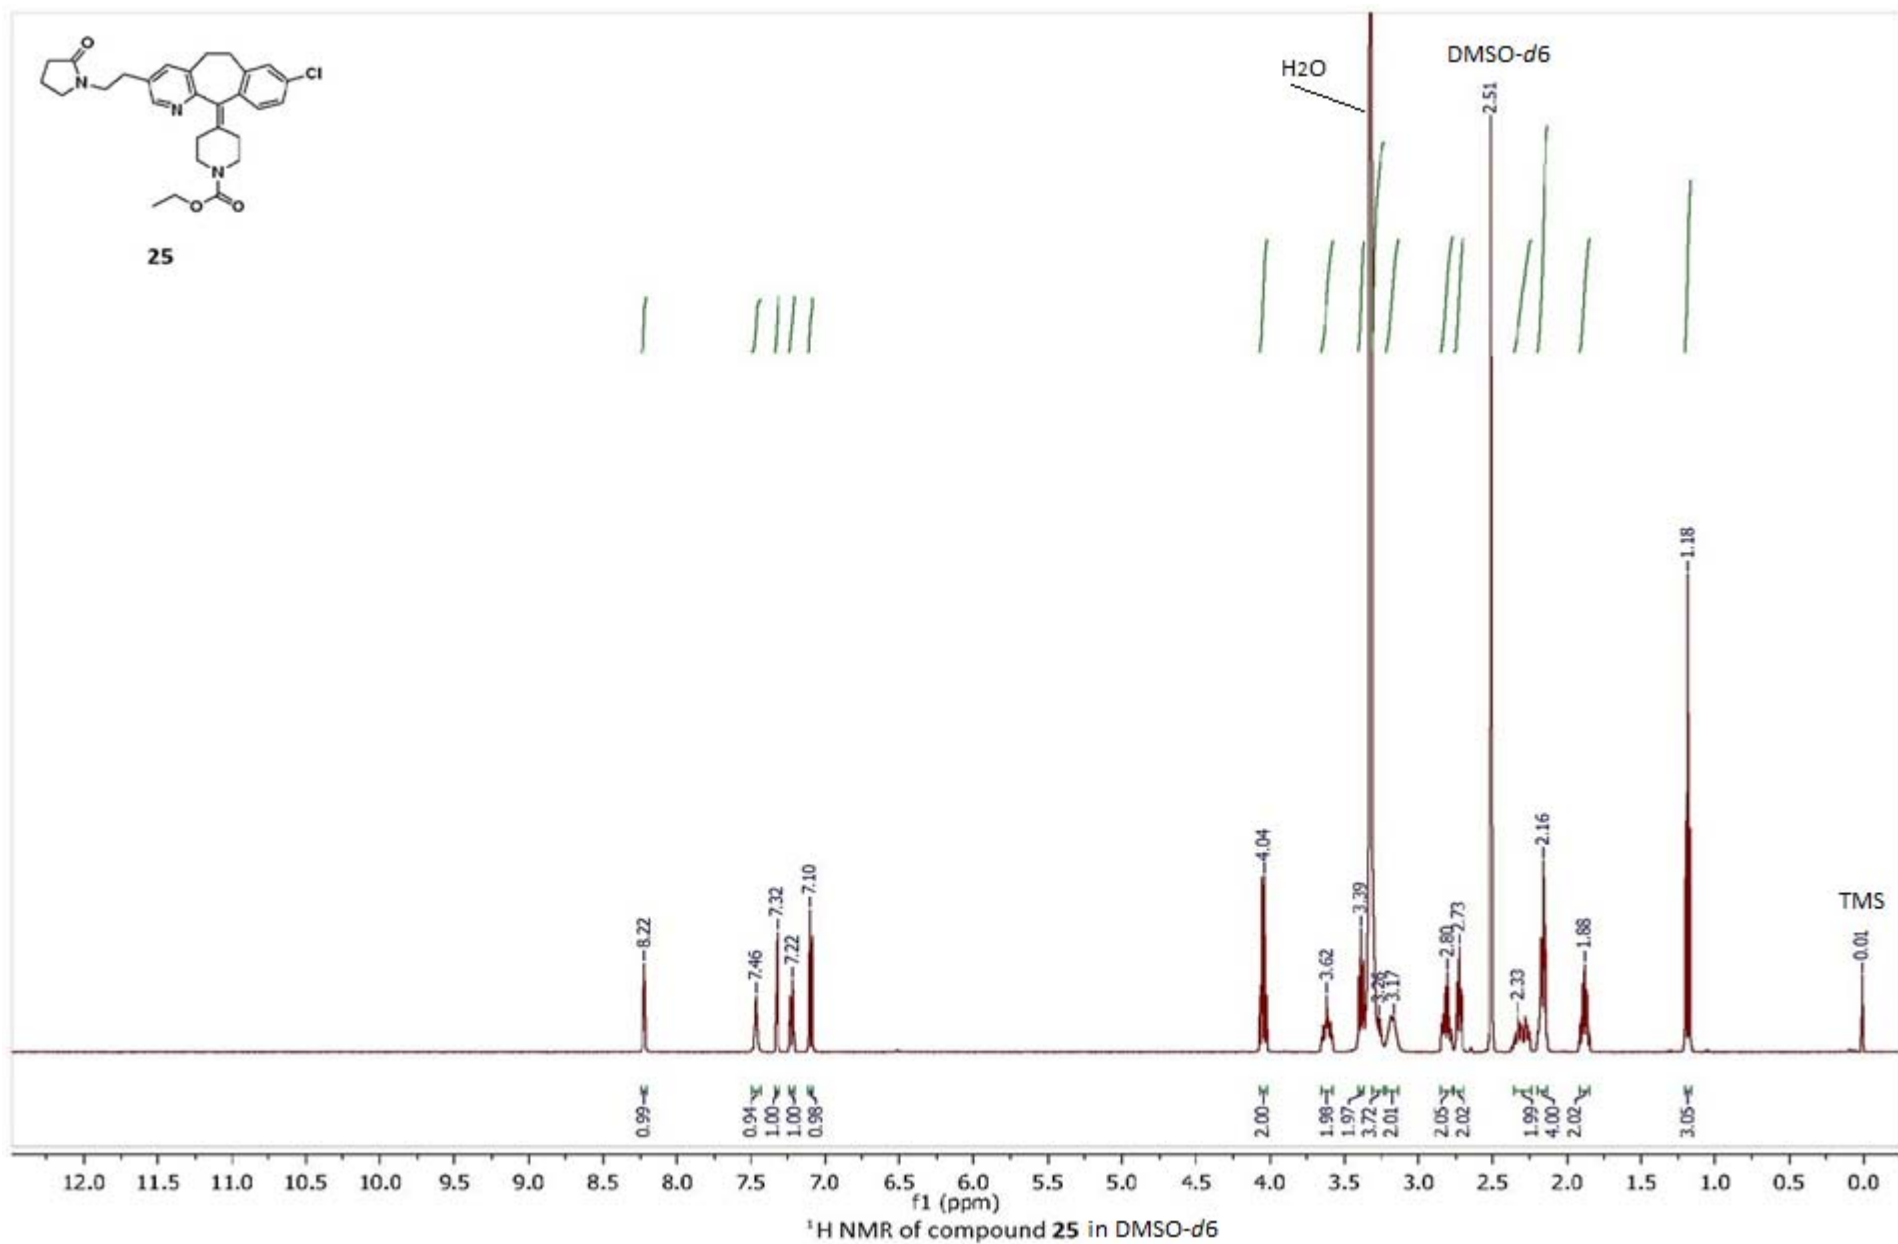

S115

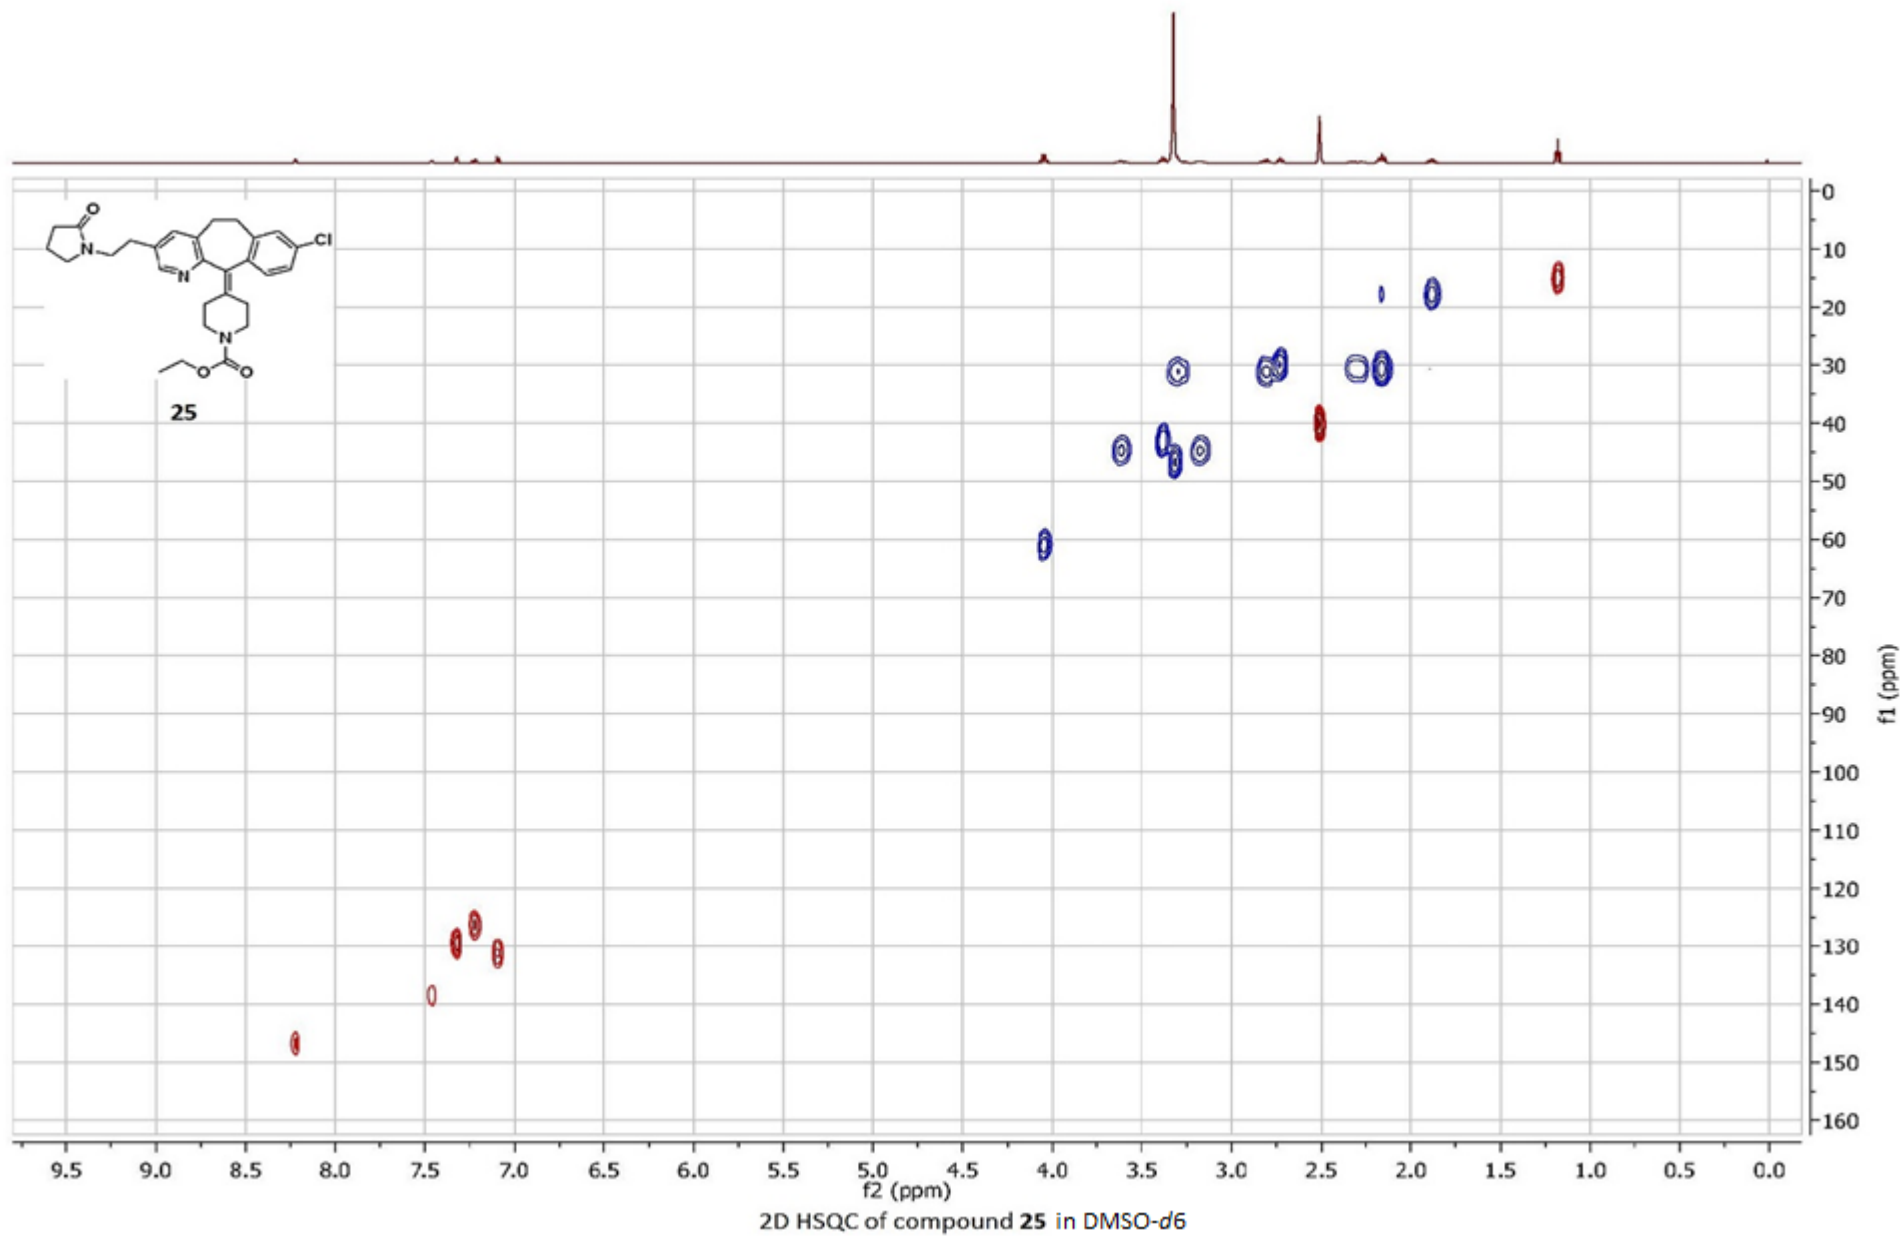

S116



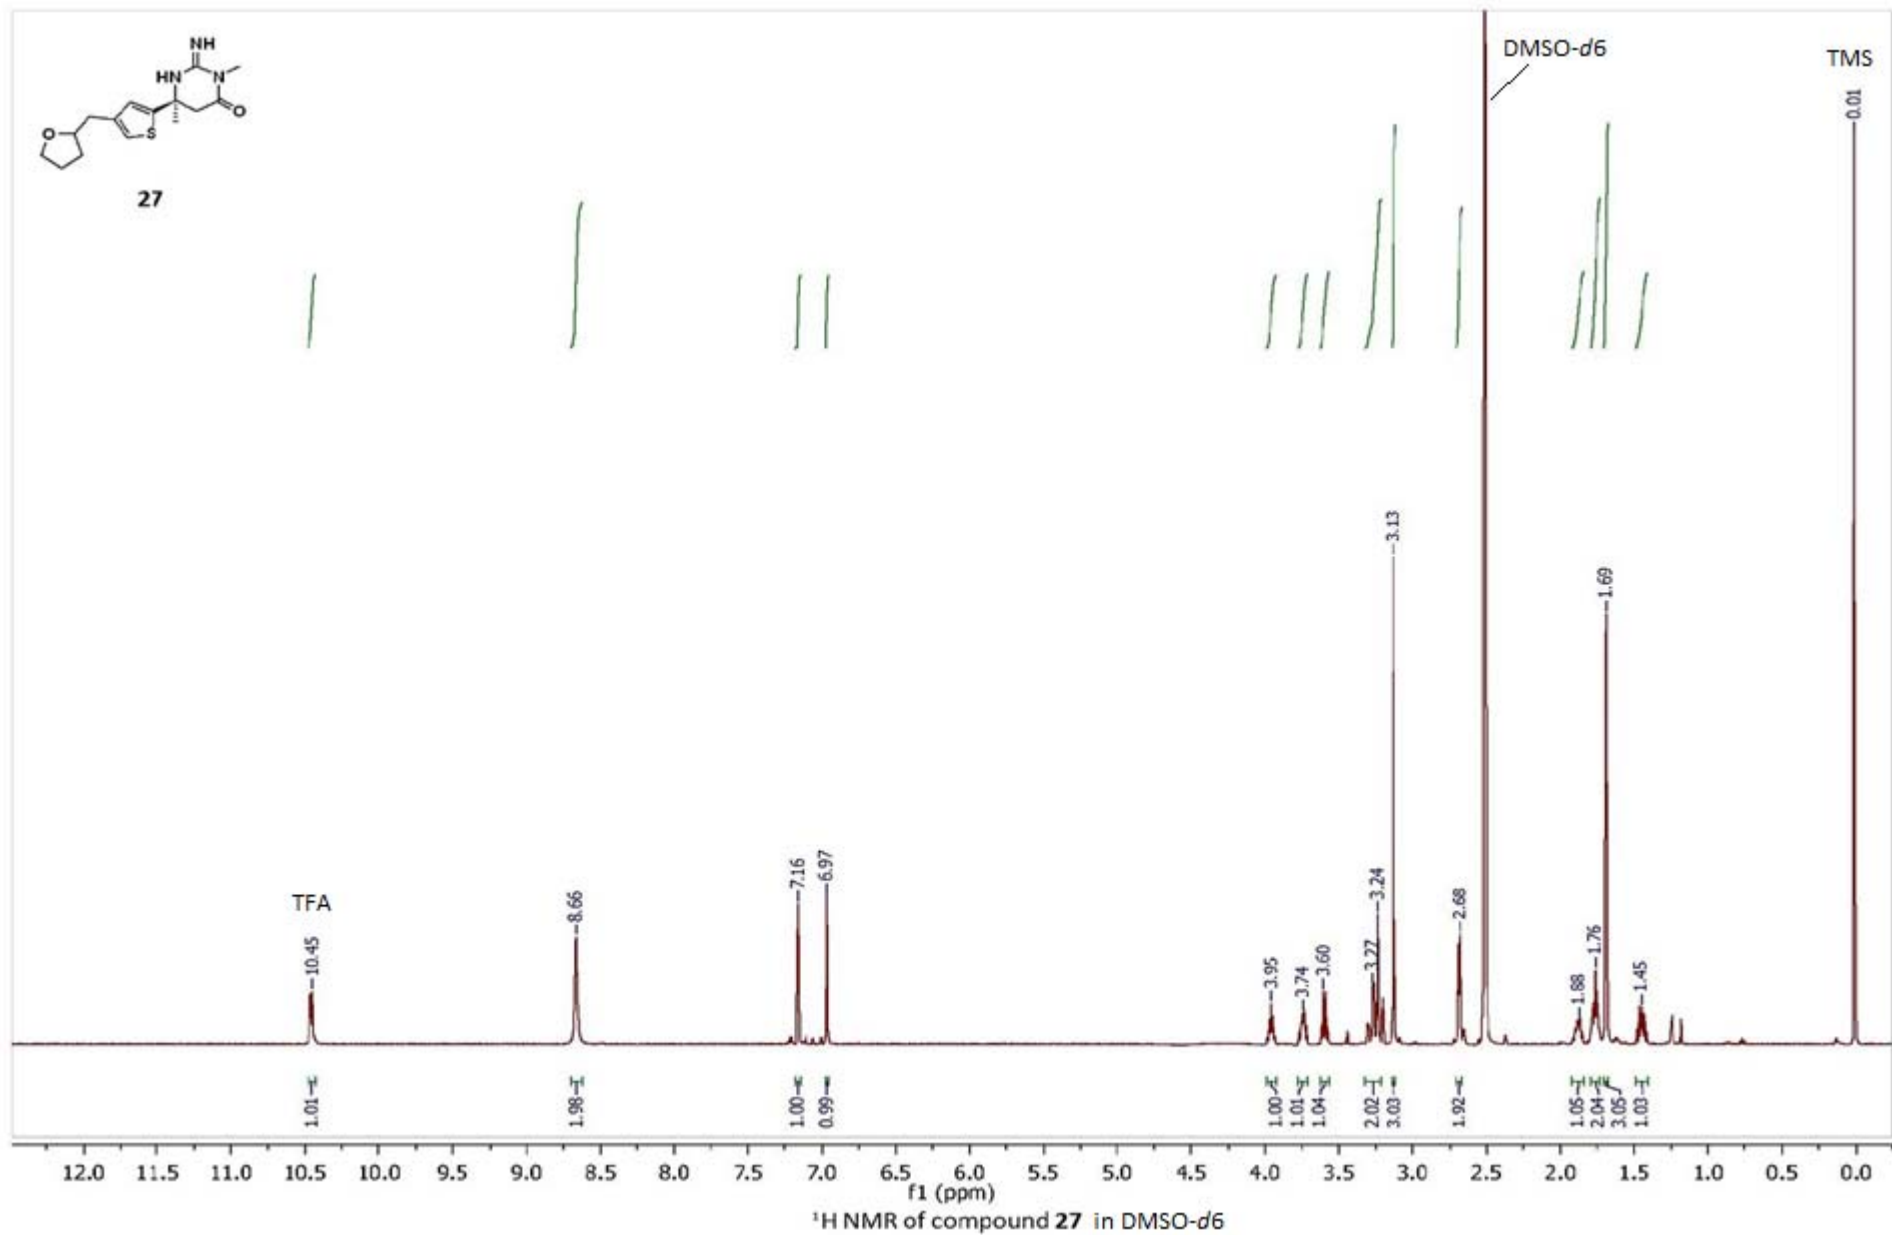

S118

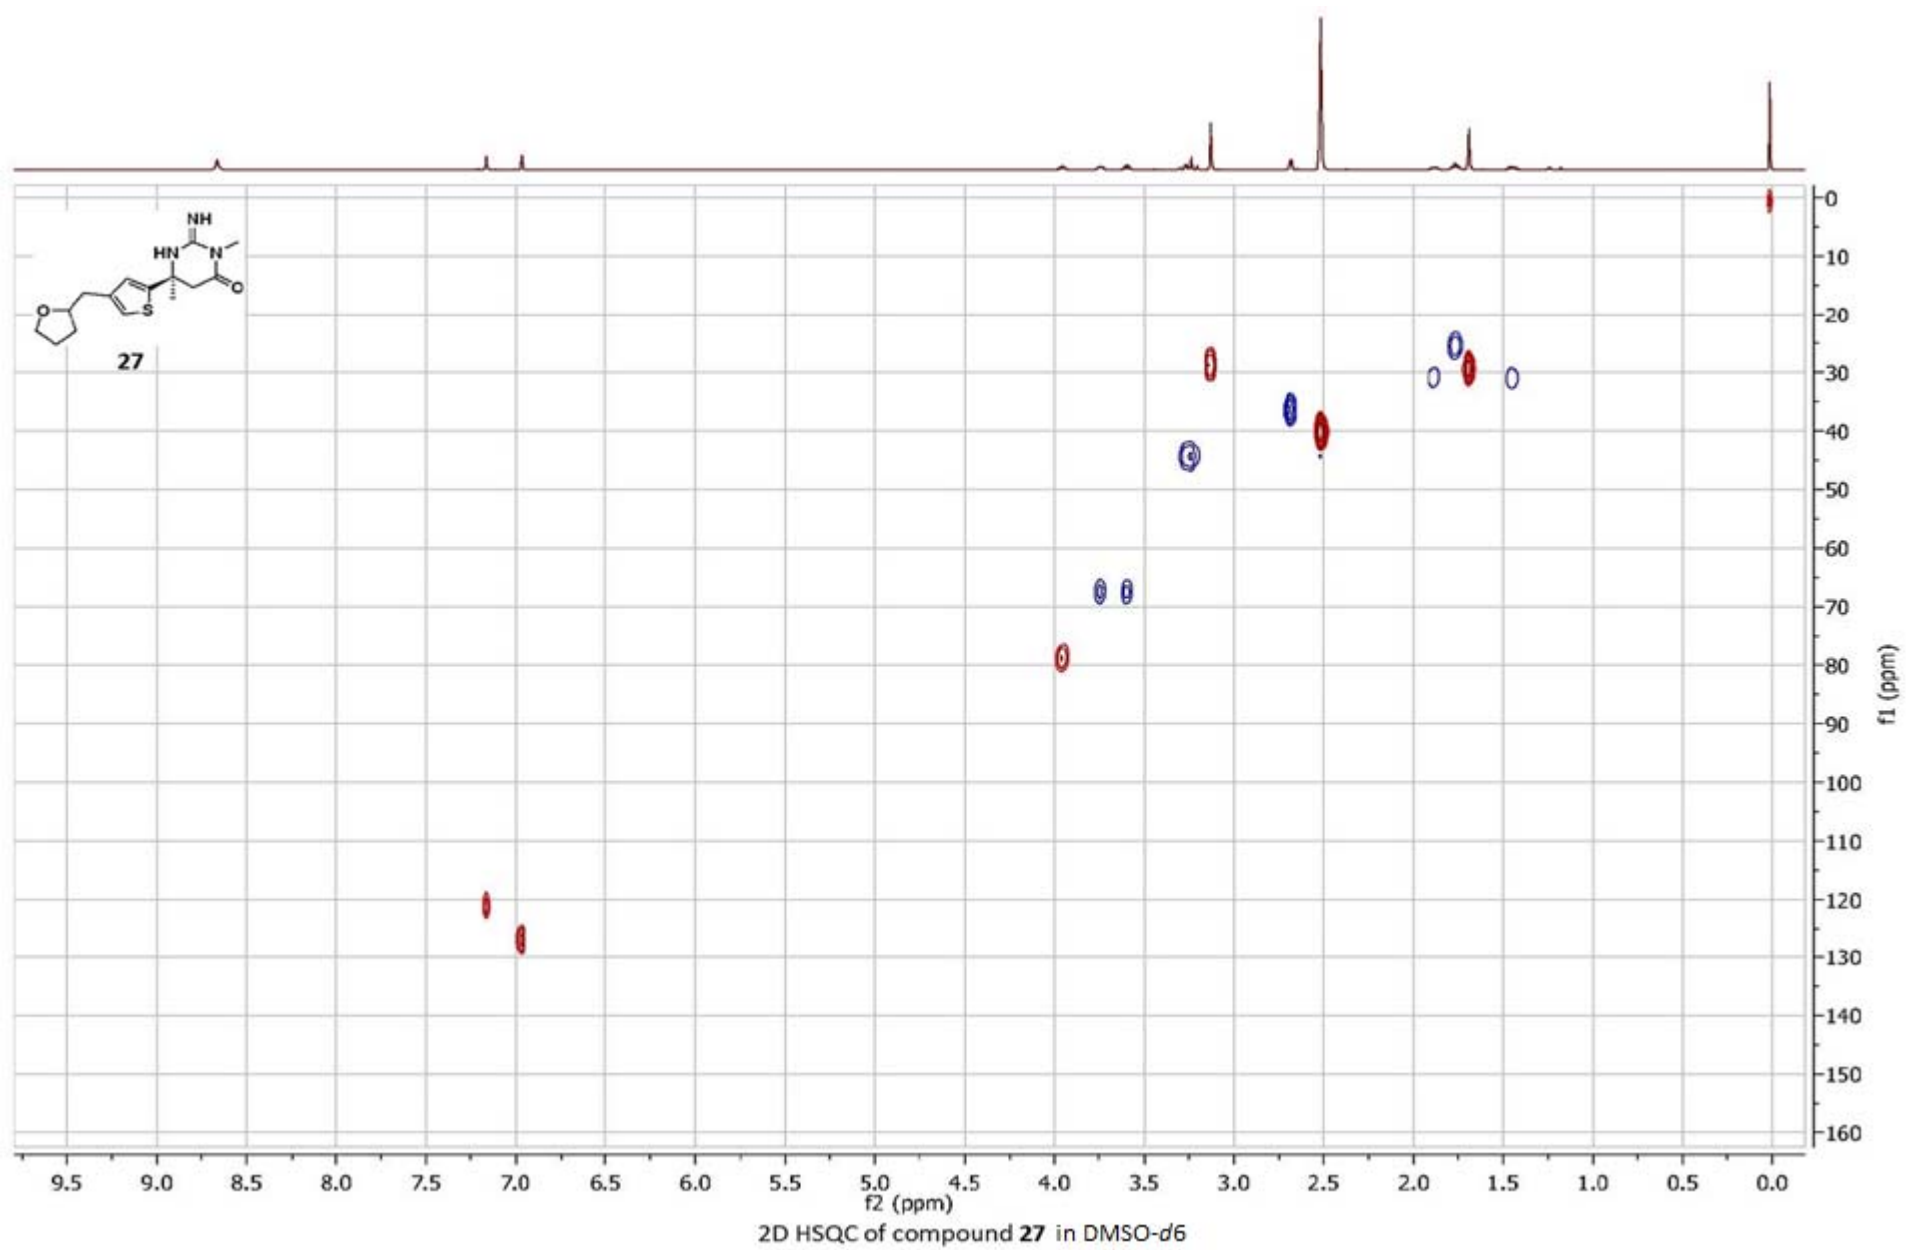





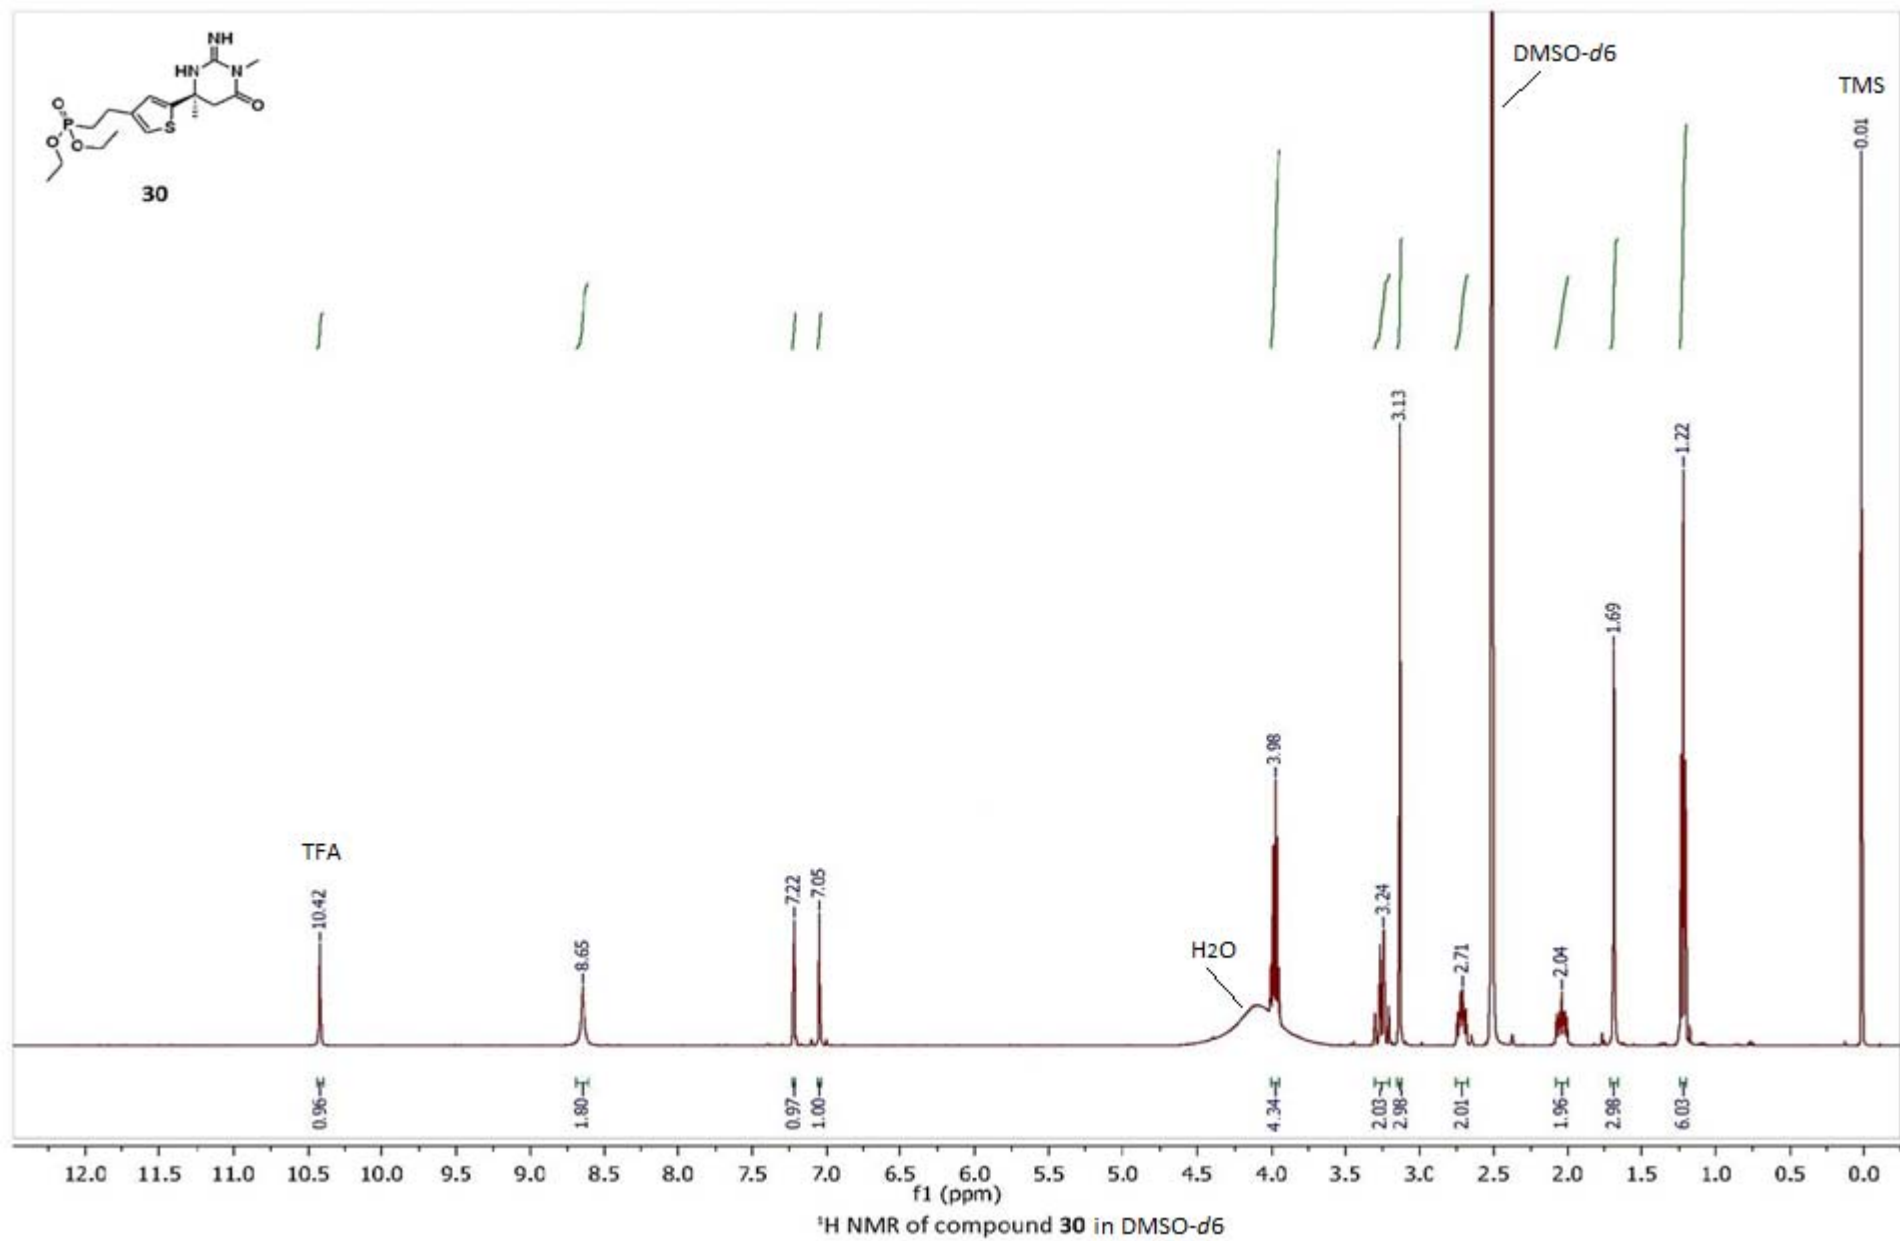

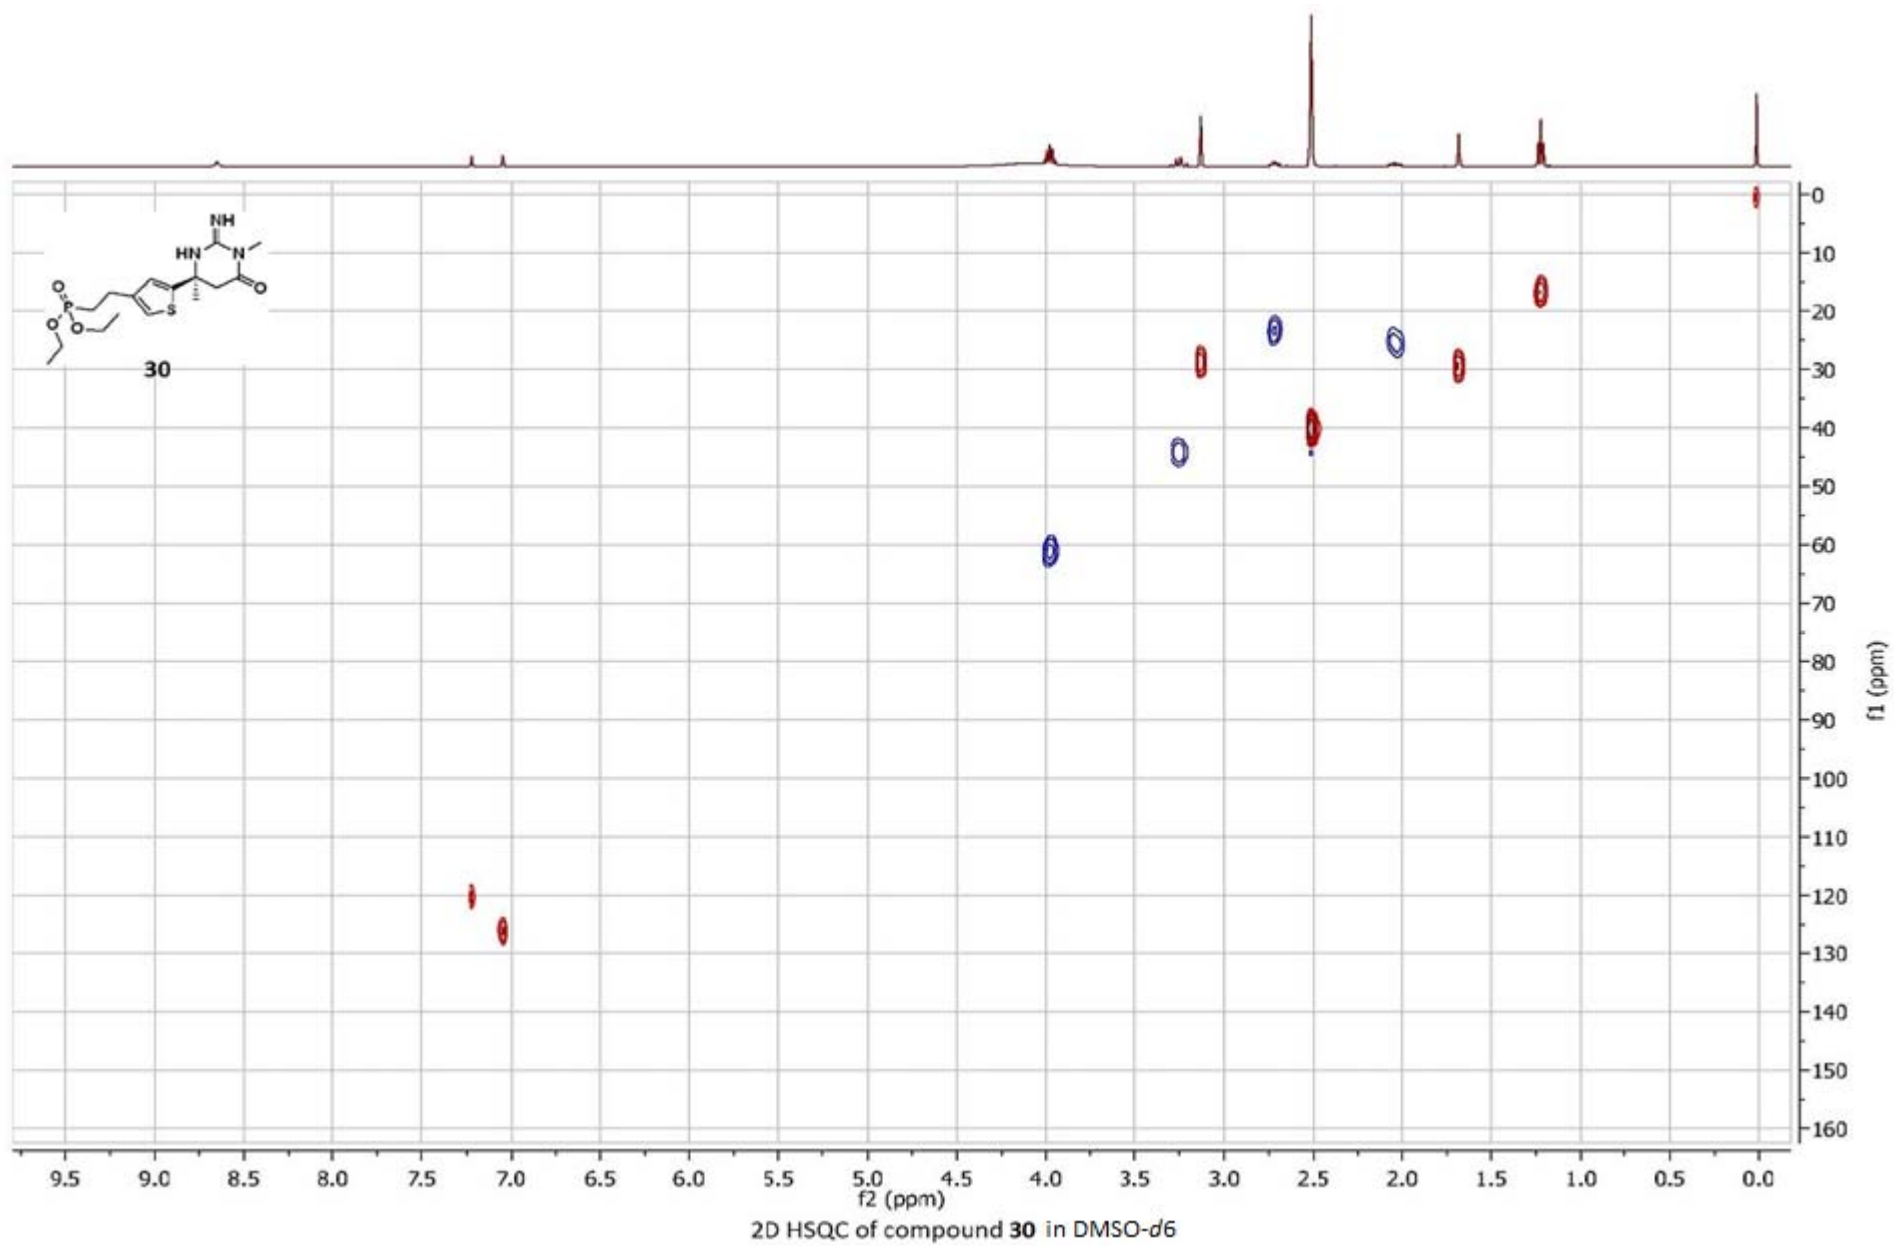

S122

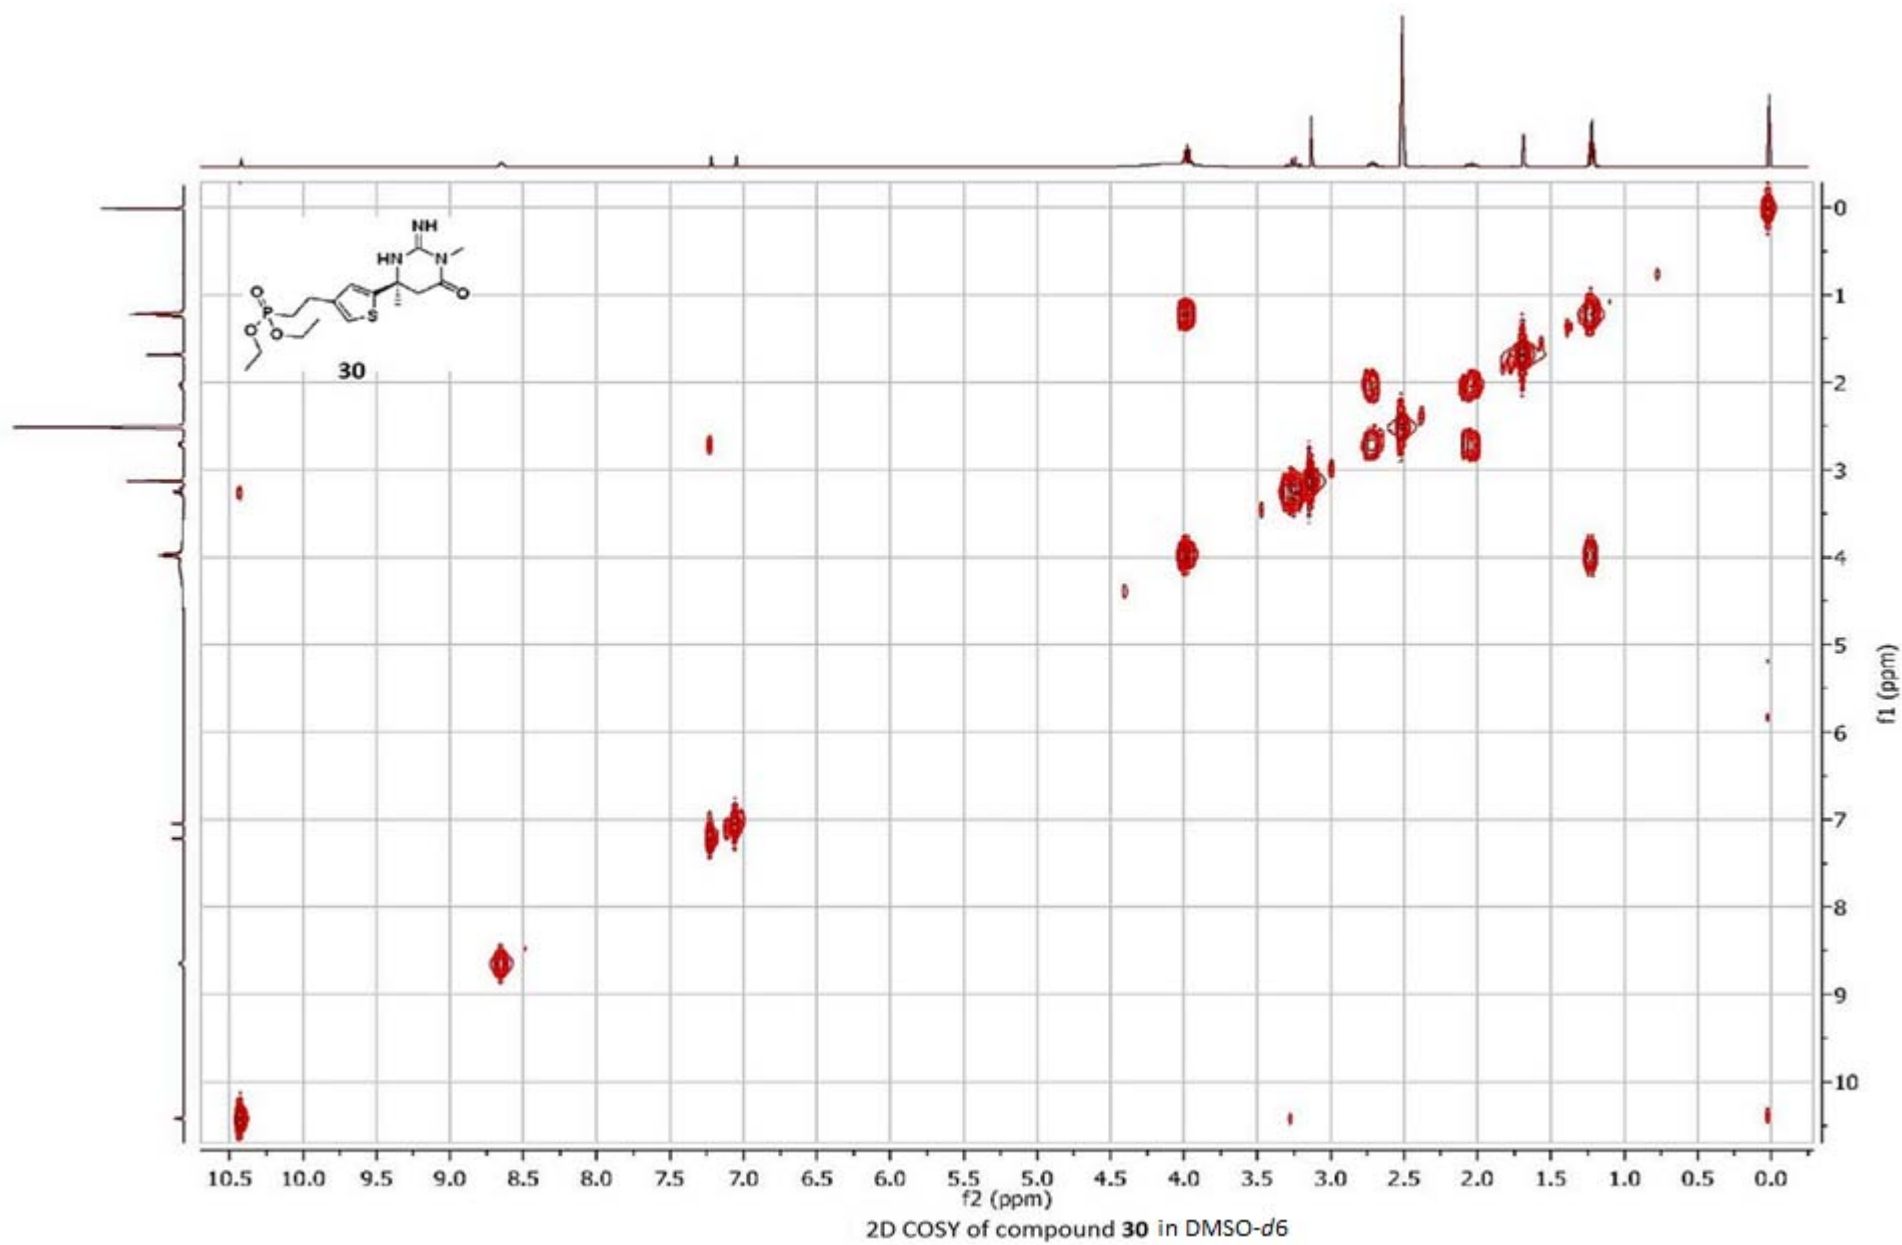

S123

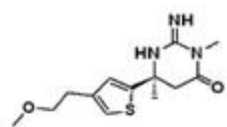

32

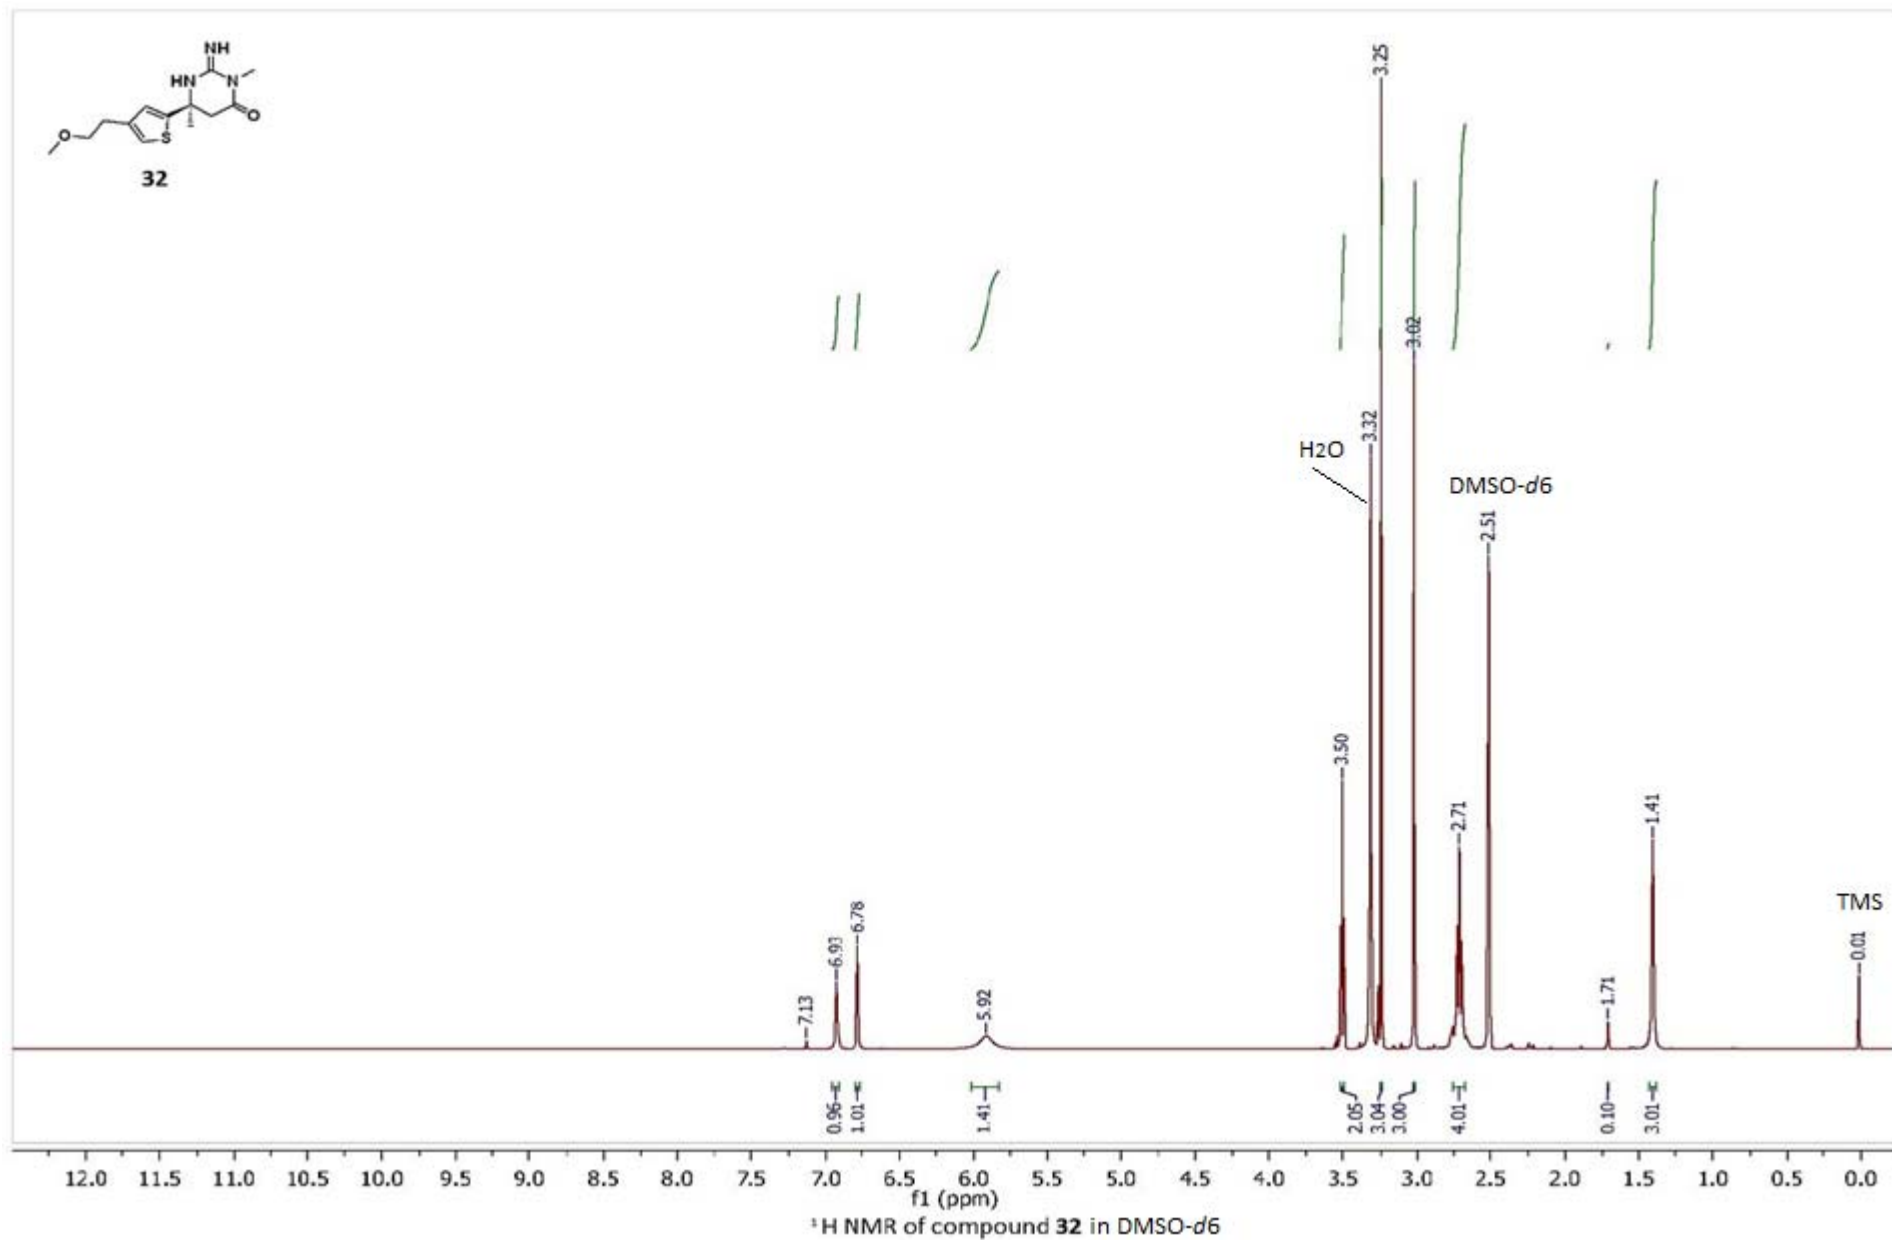

S124

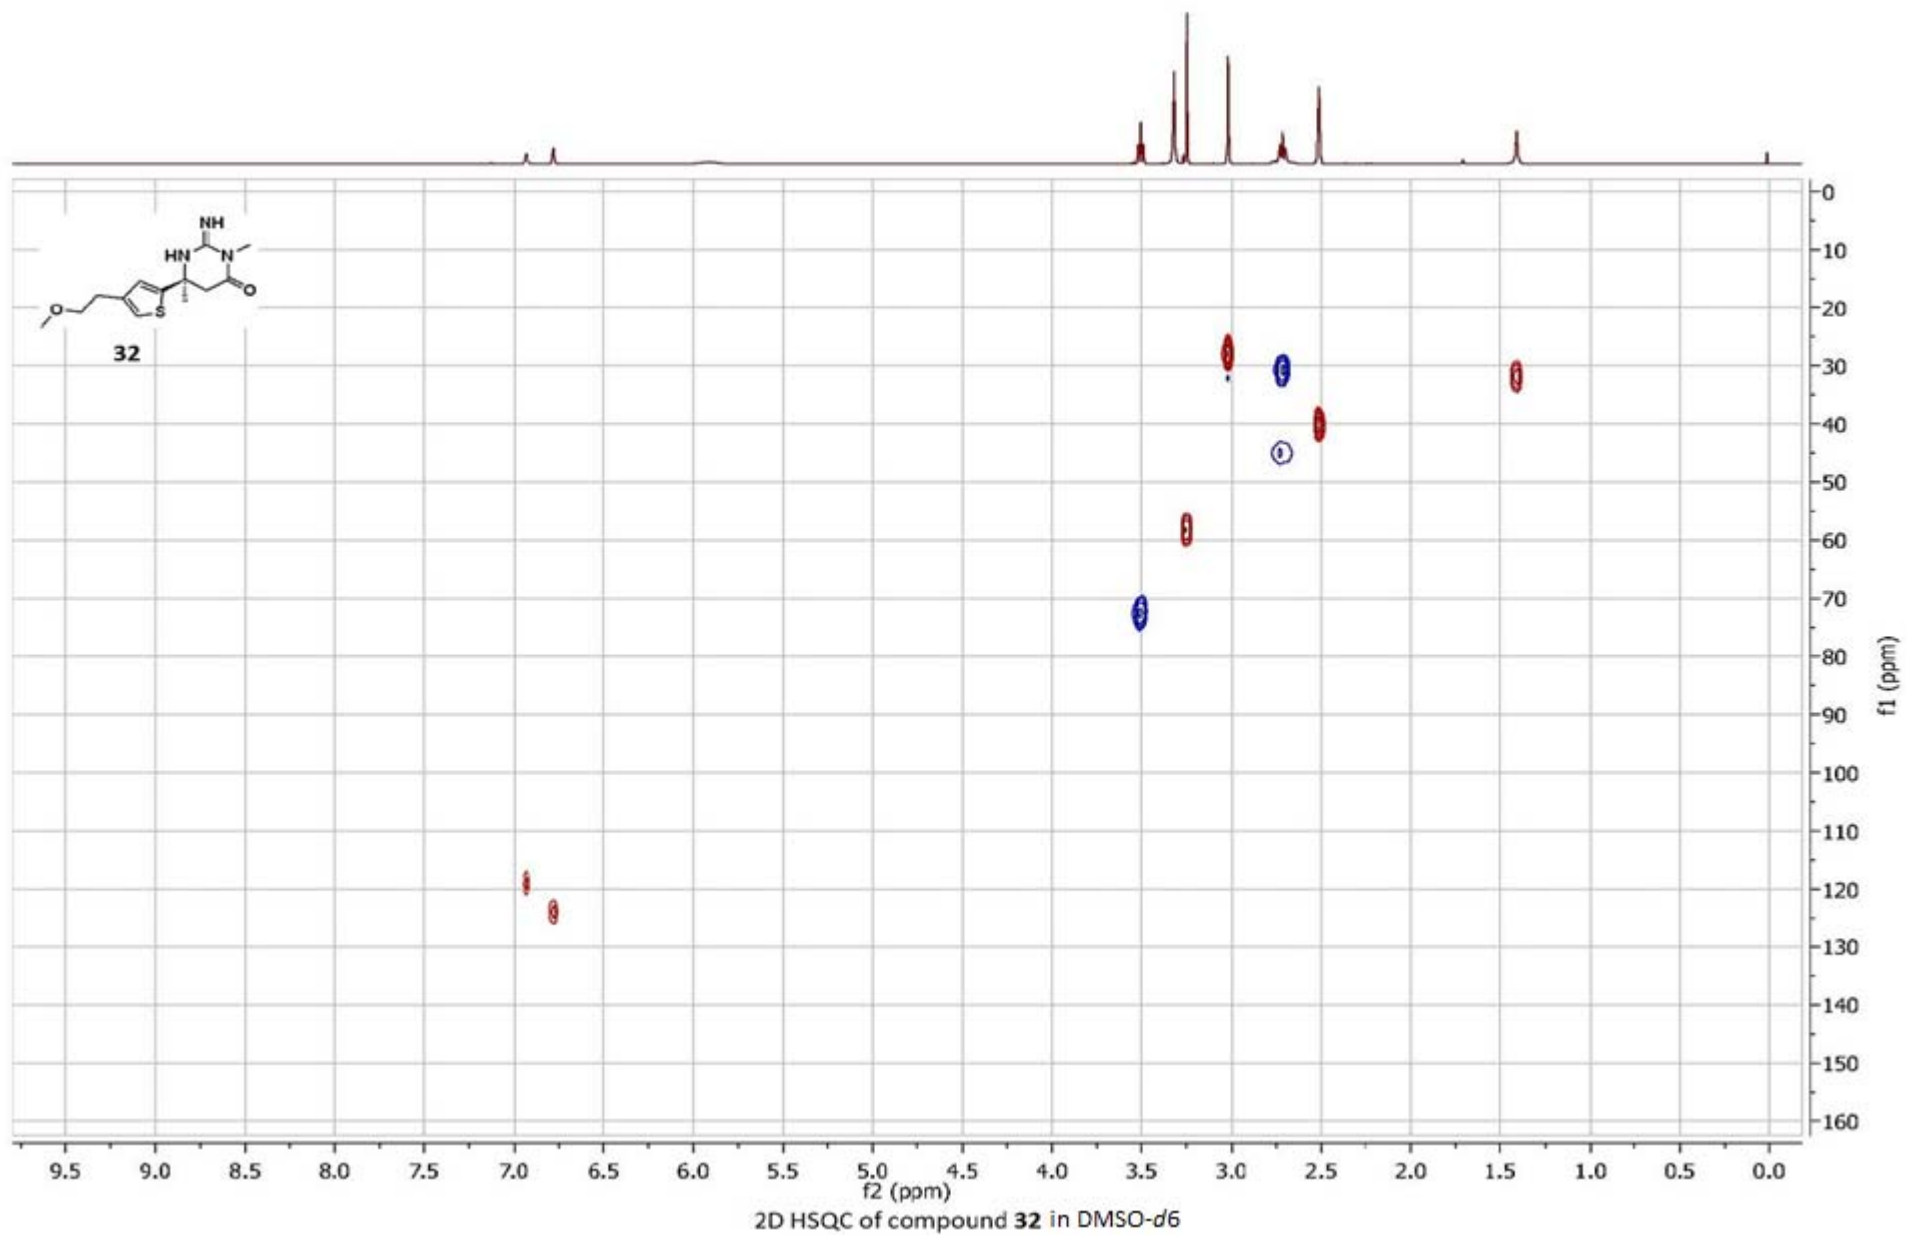

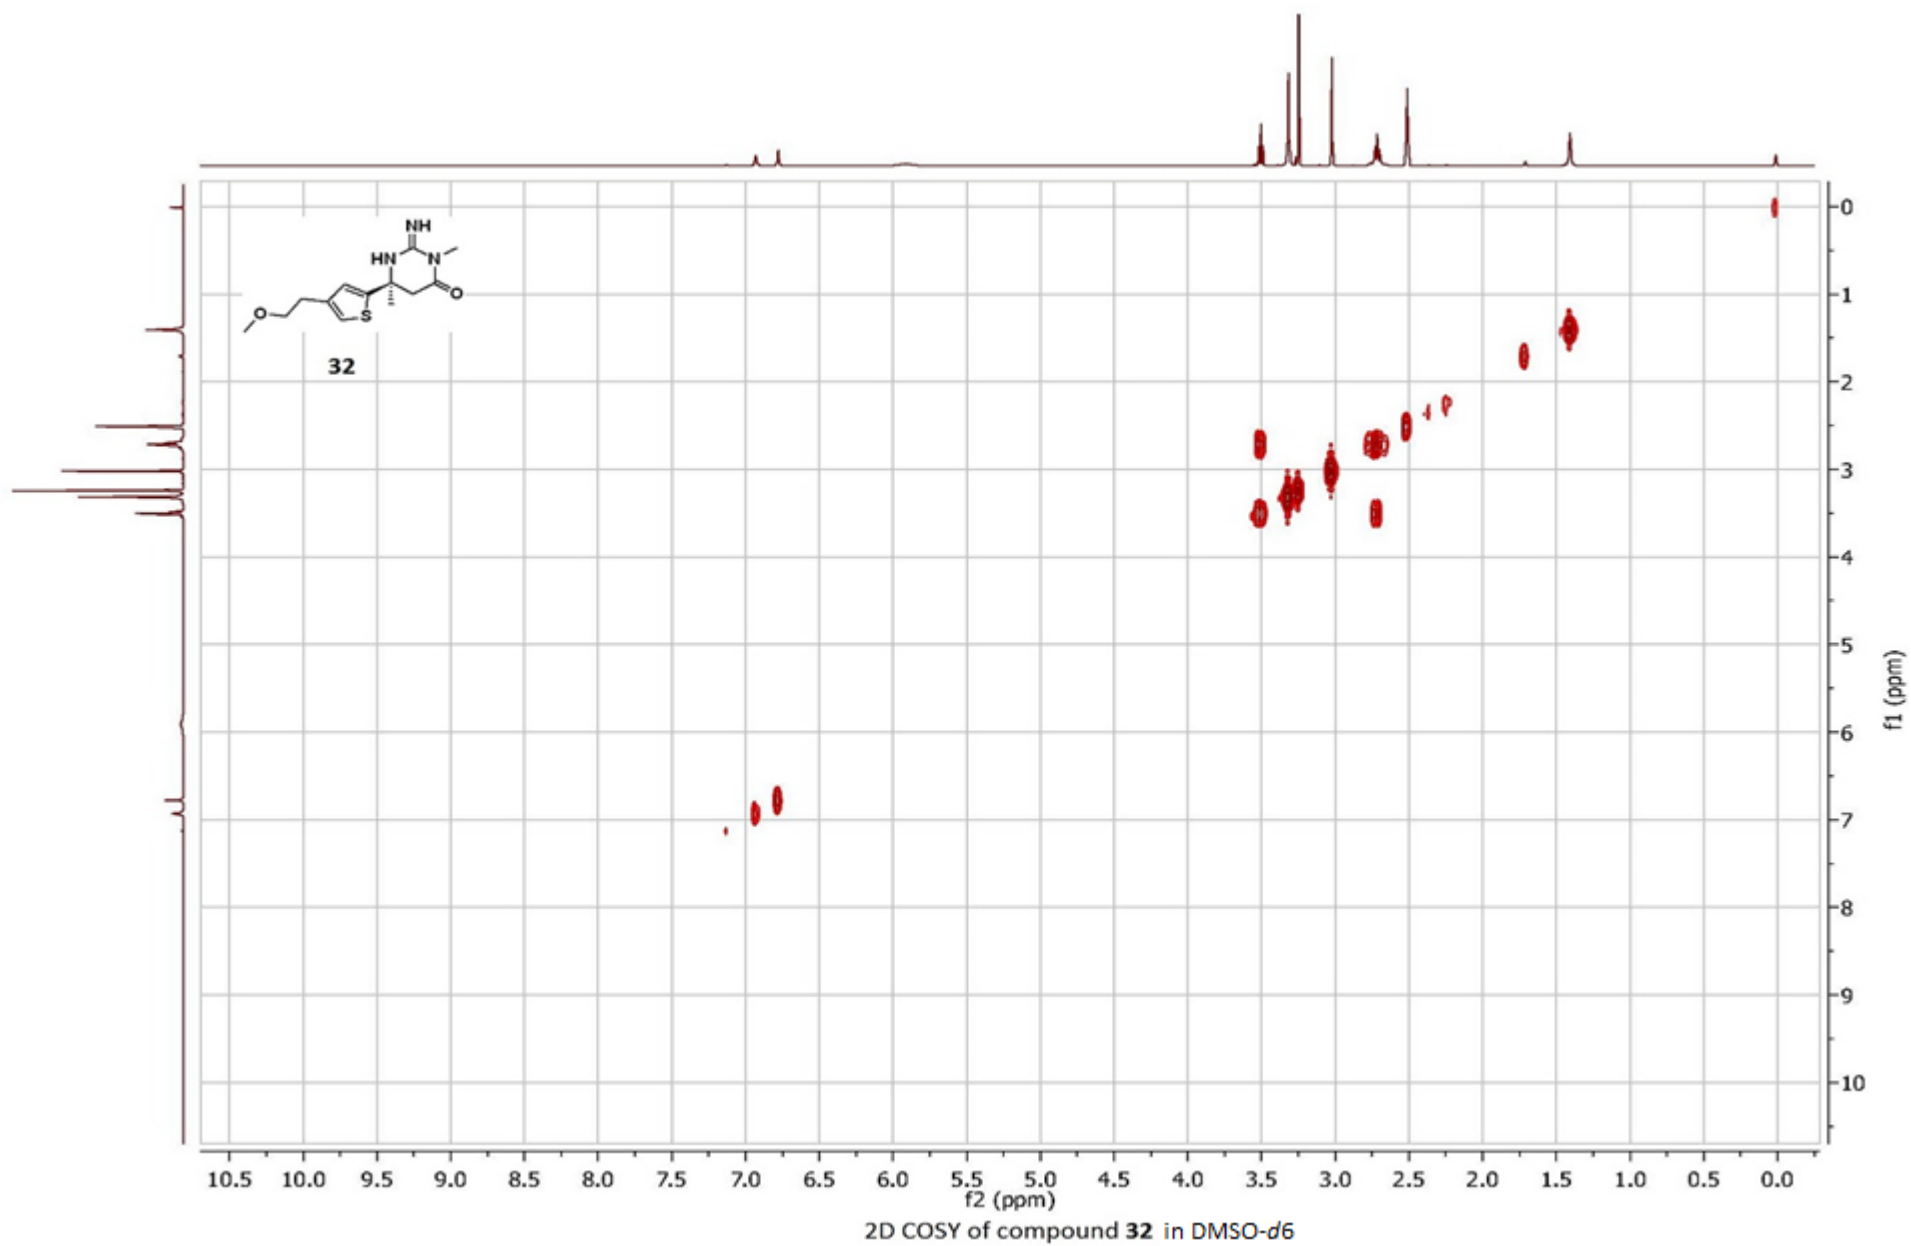

S126

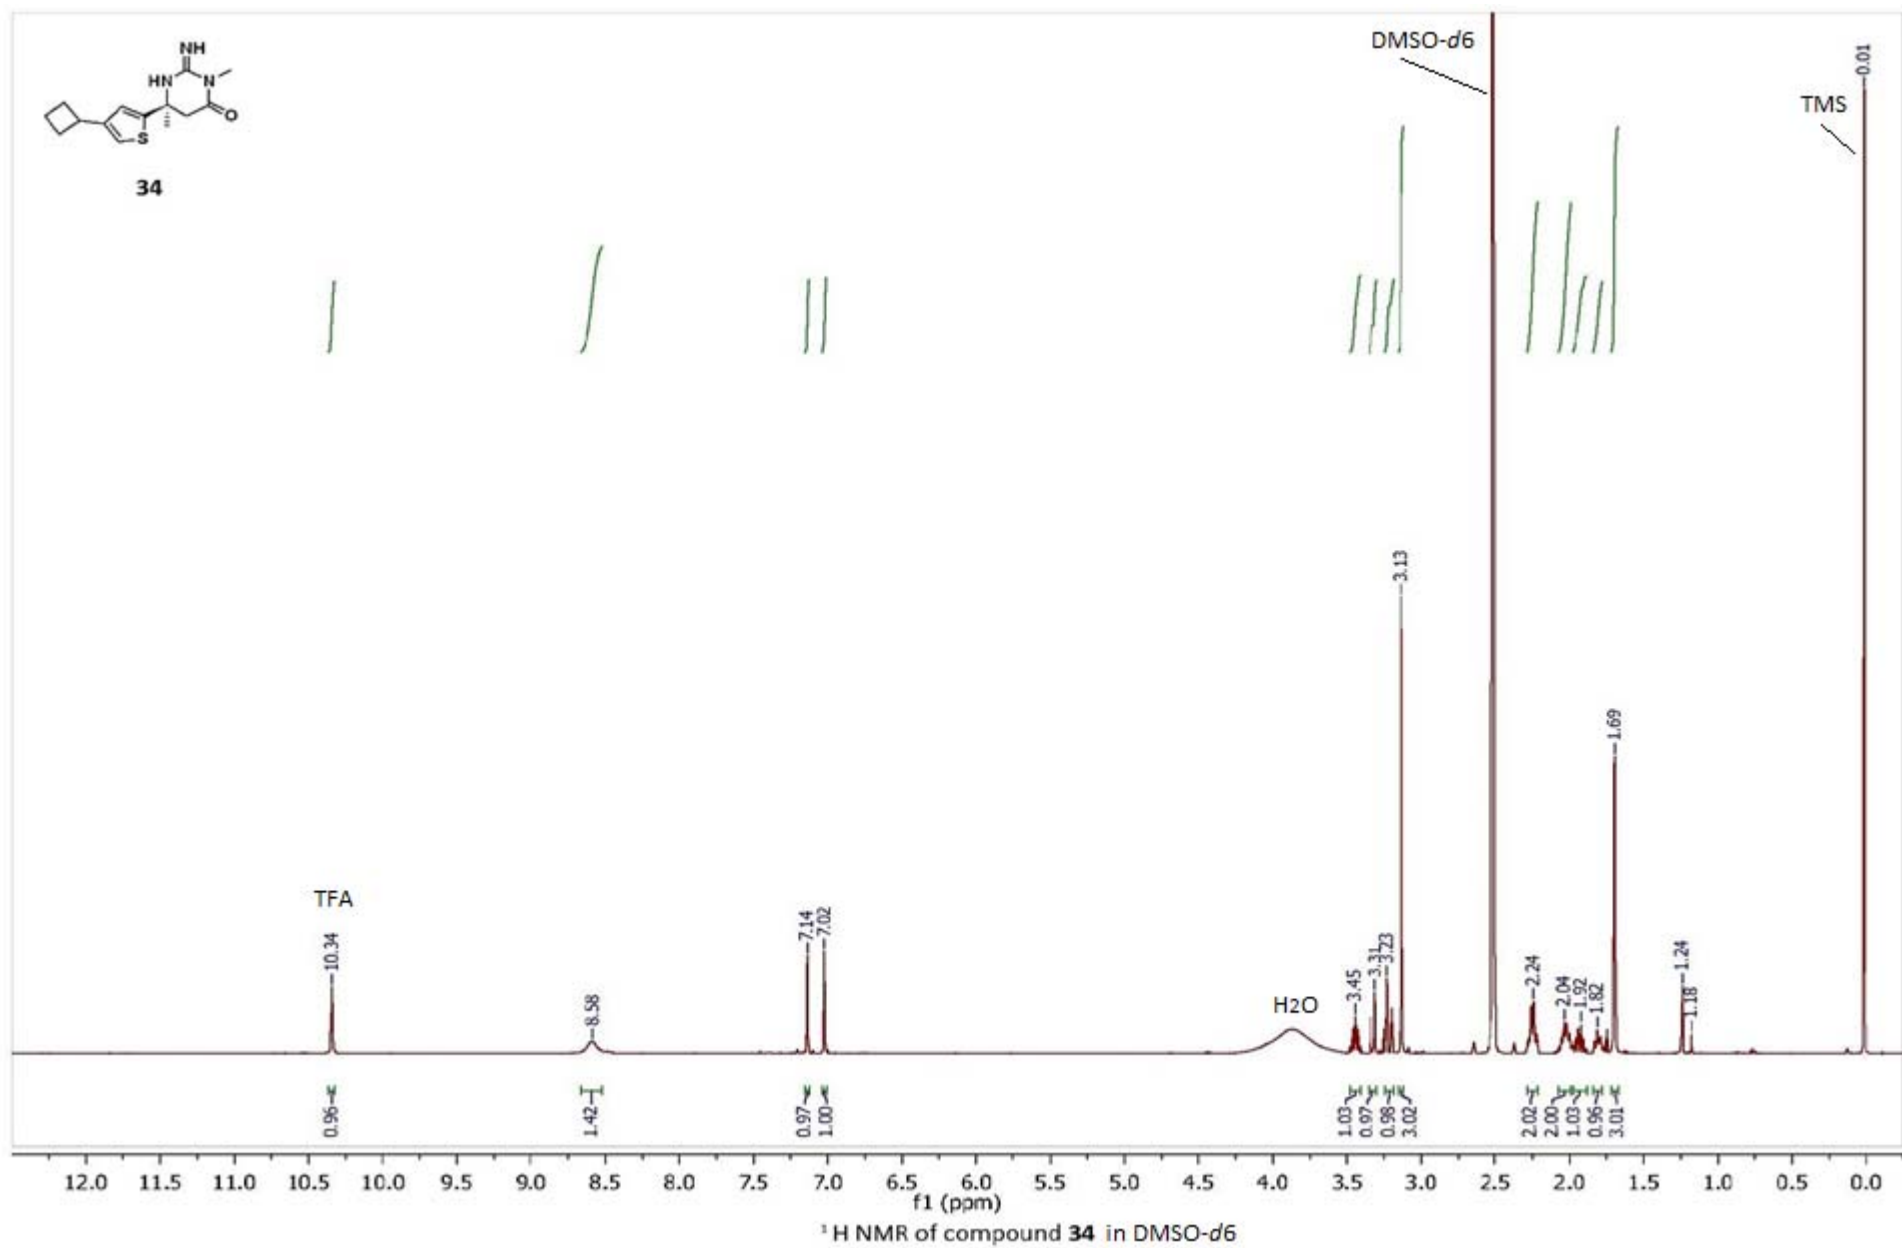

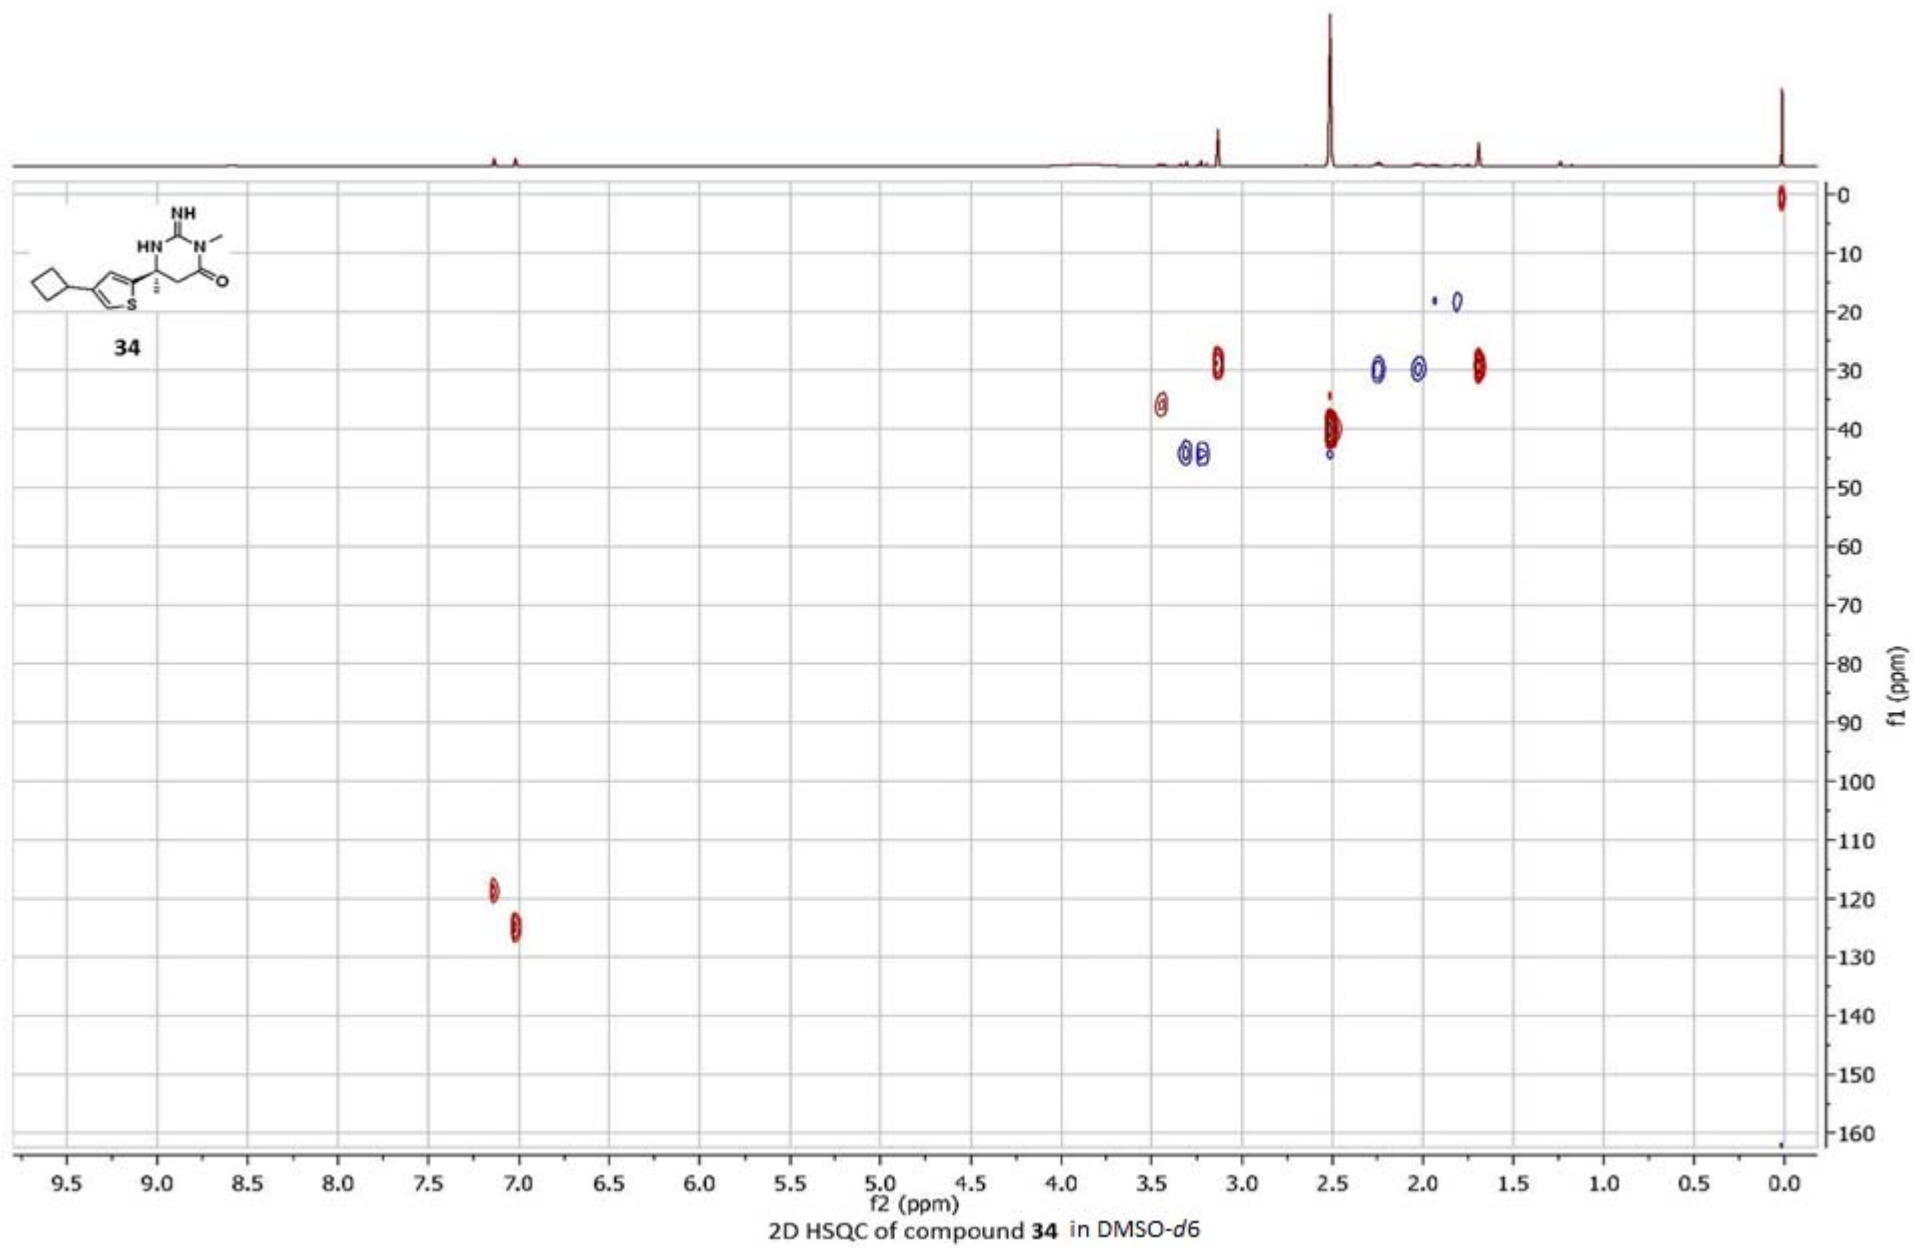



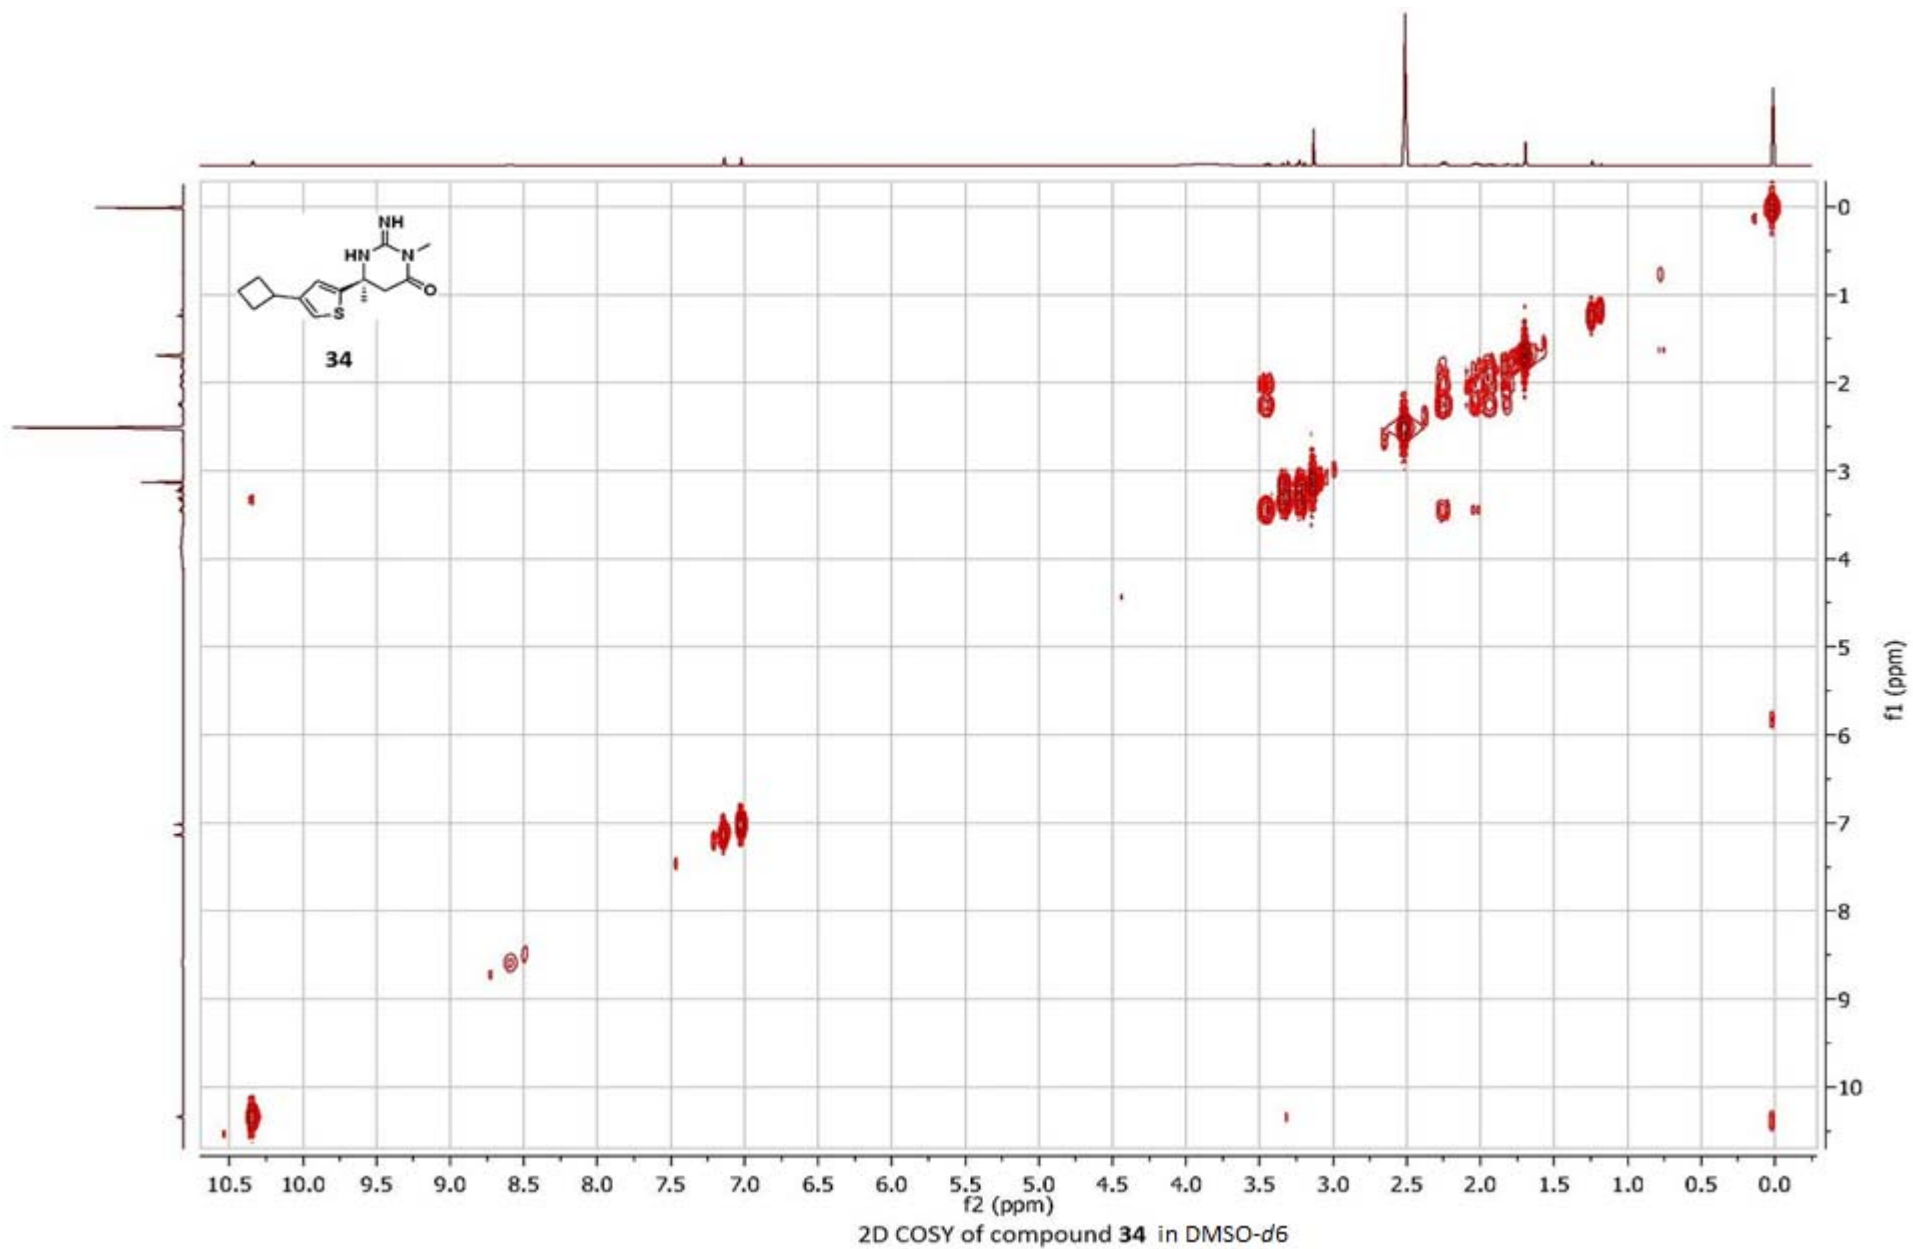

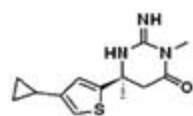

**36**

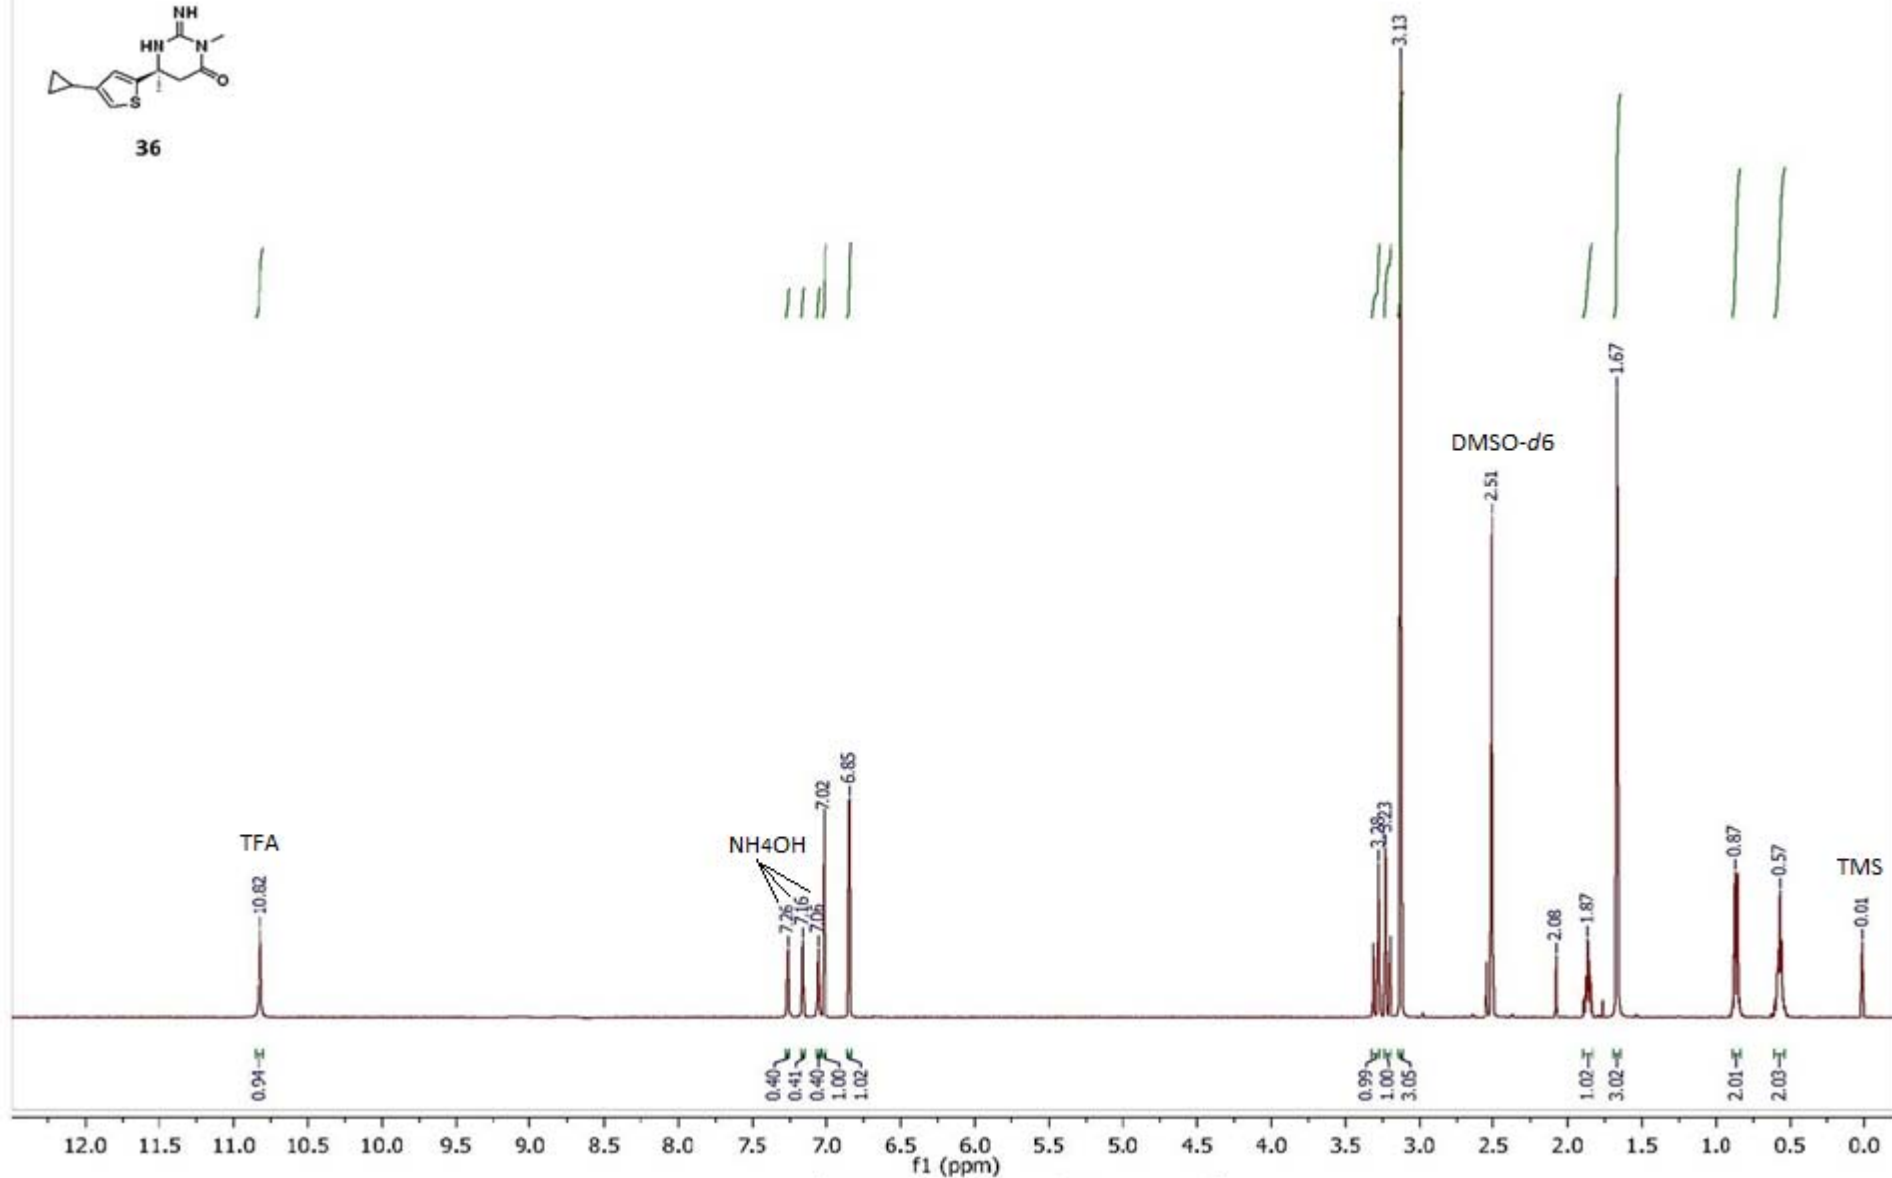

<sup>1</sup>H NMR of compound **36** in DMSO-*d*<sub>6</sub>

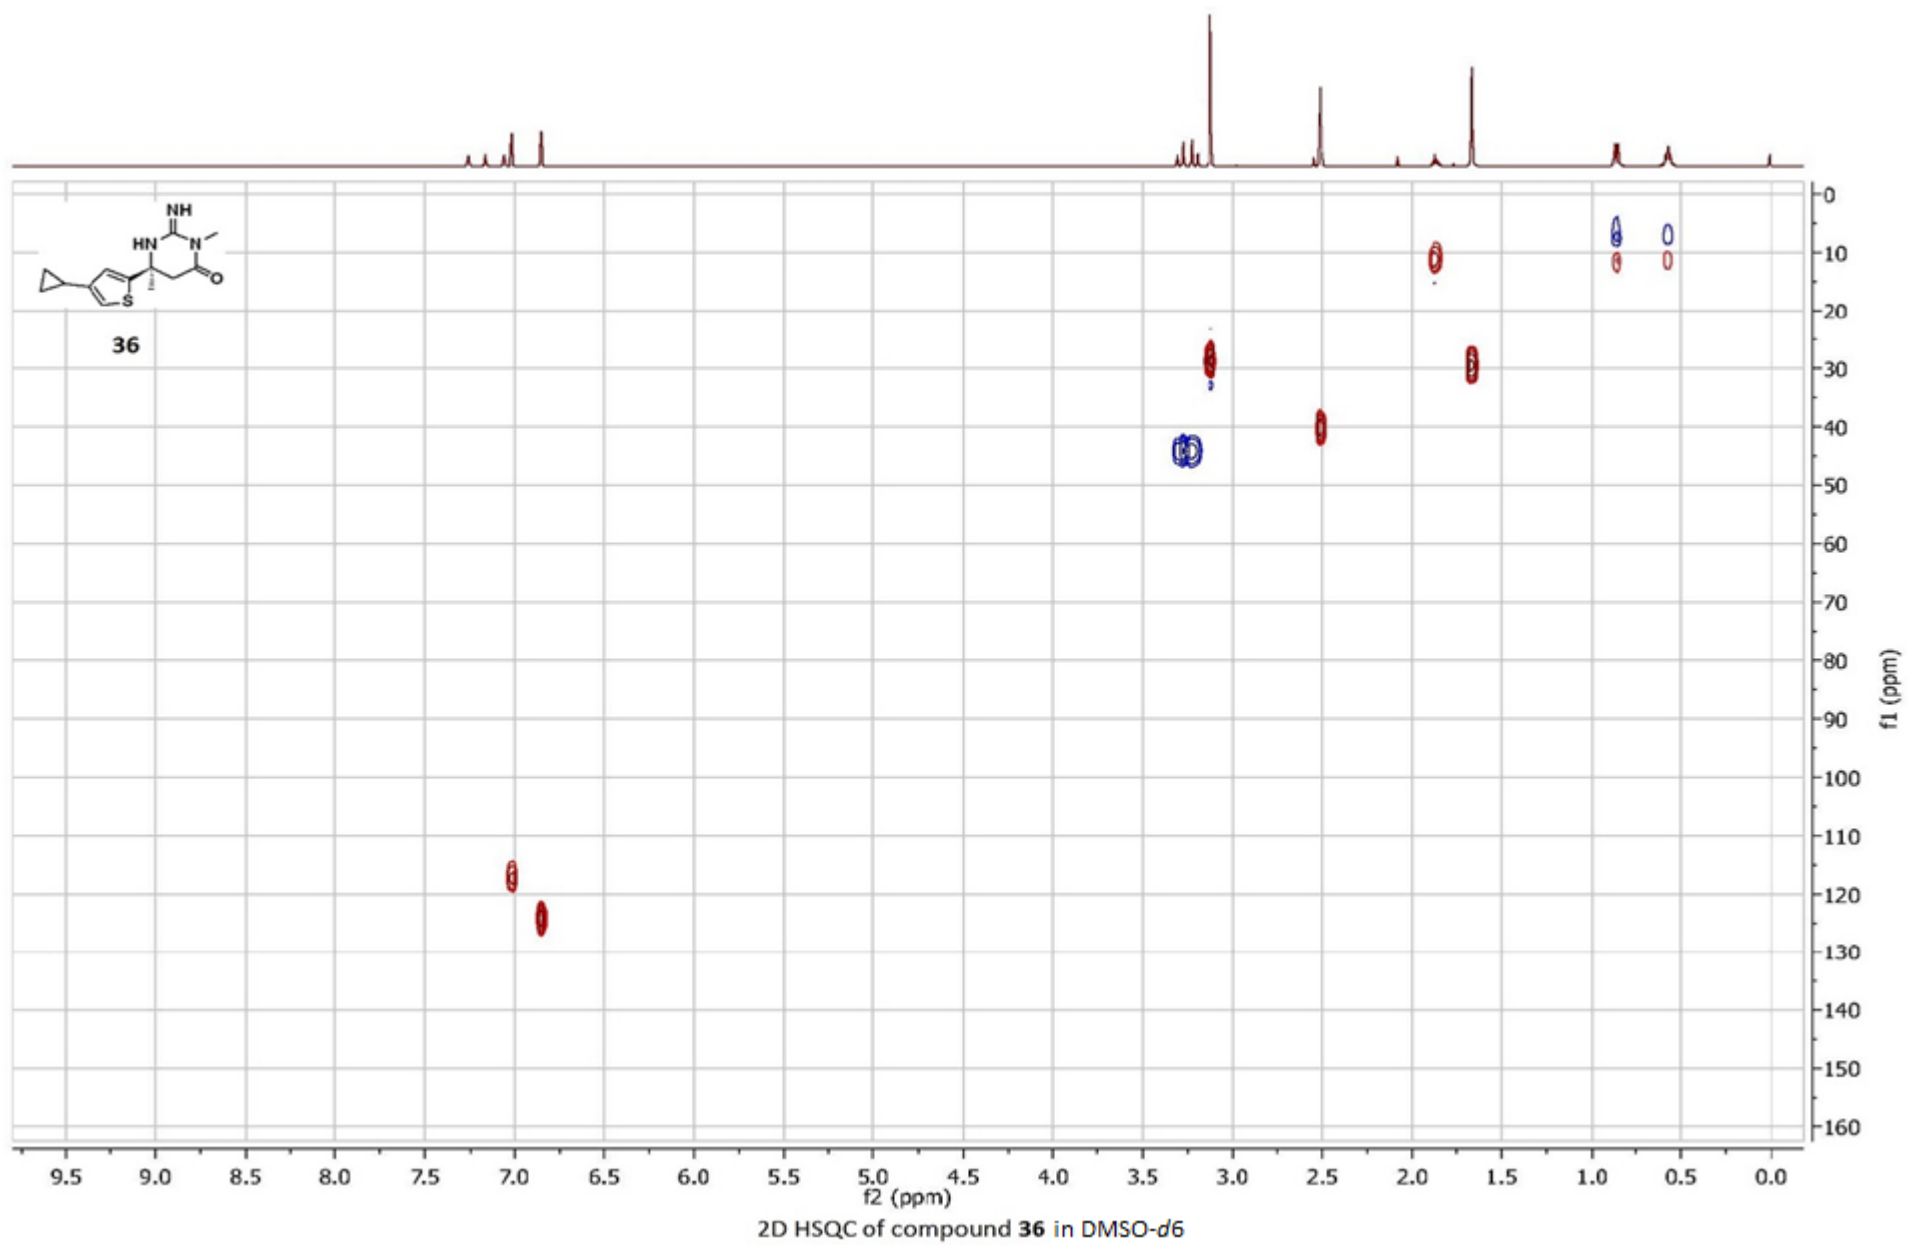

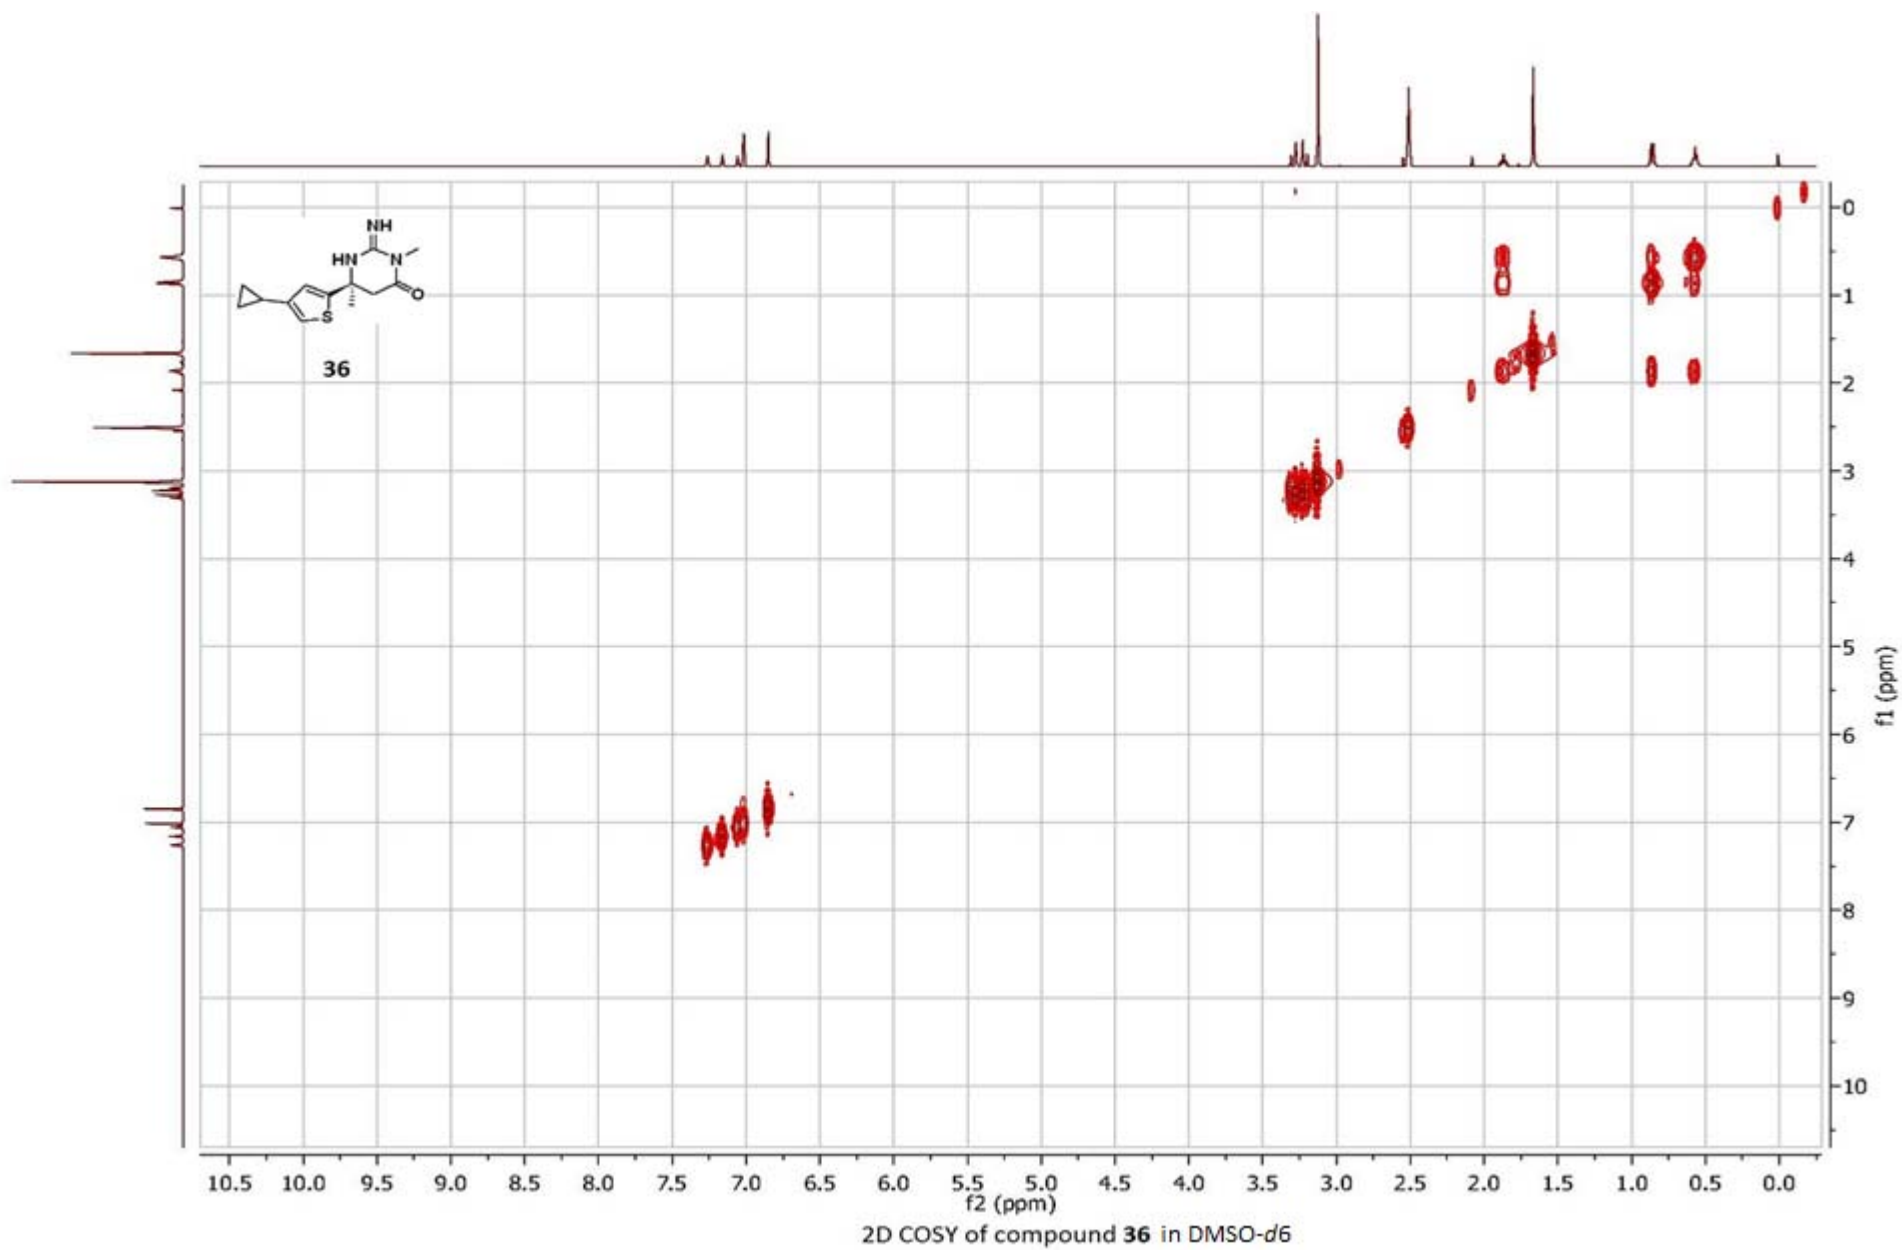

S132

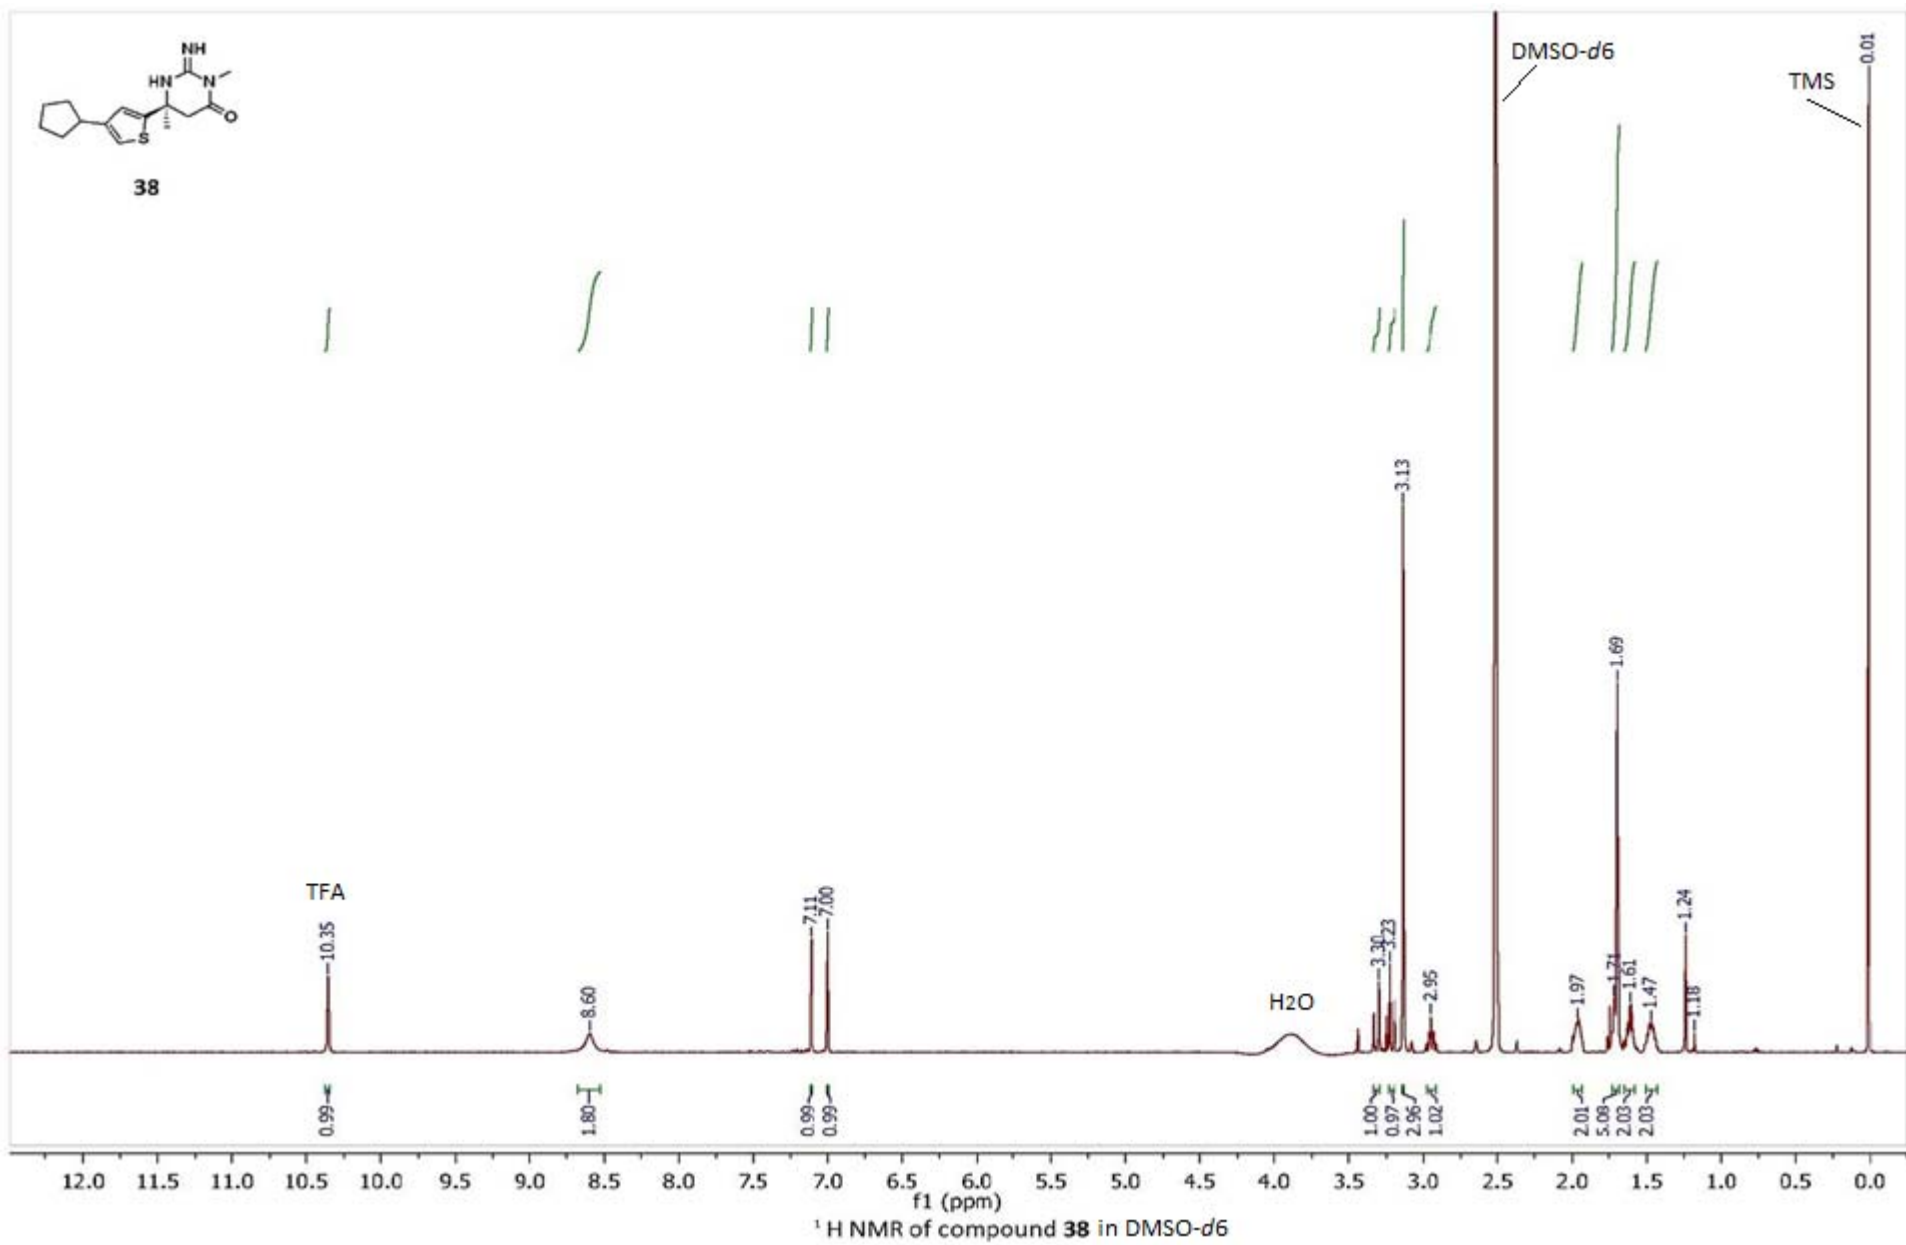

S133

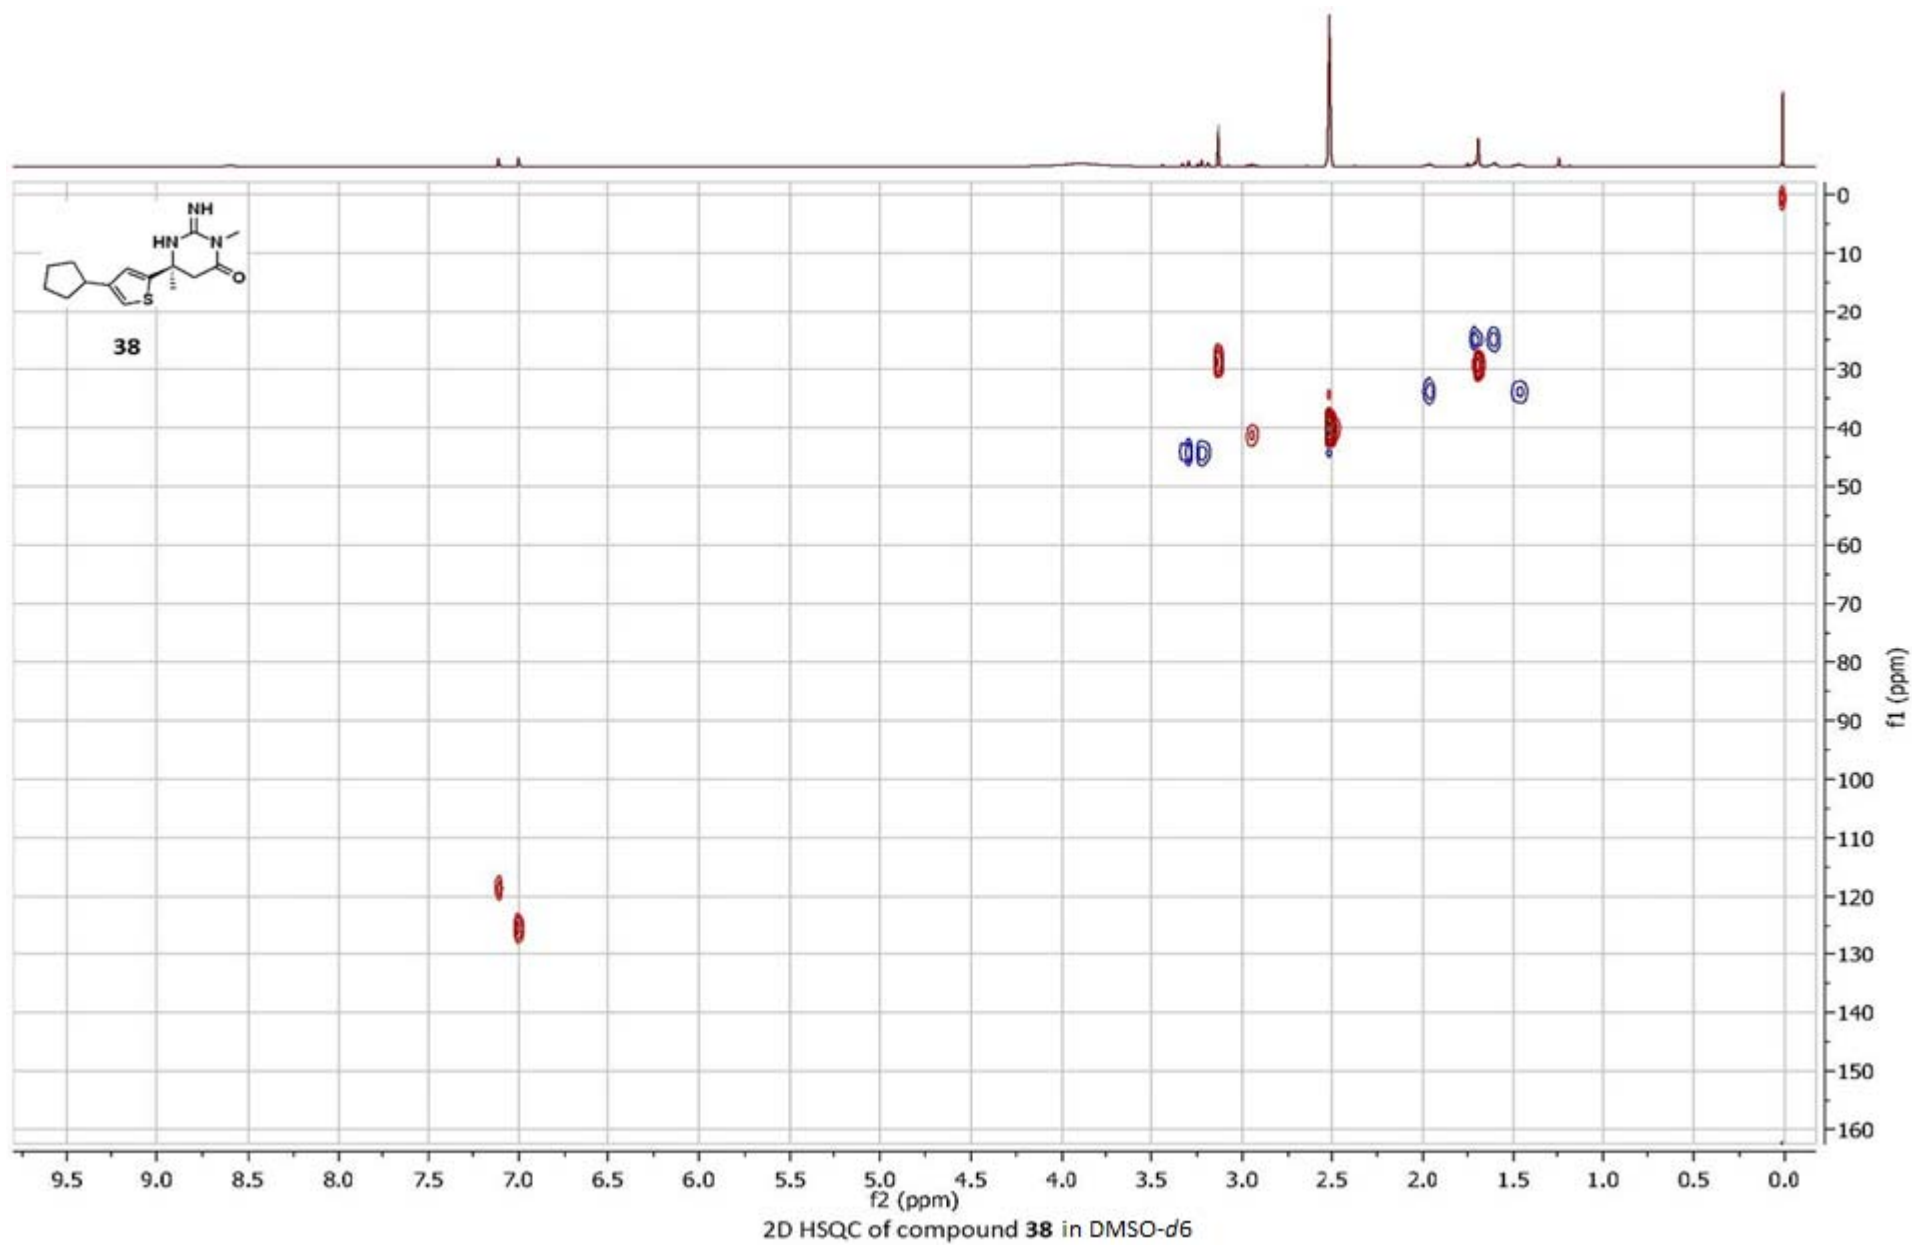

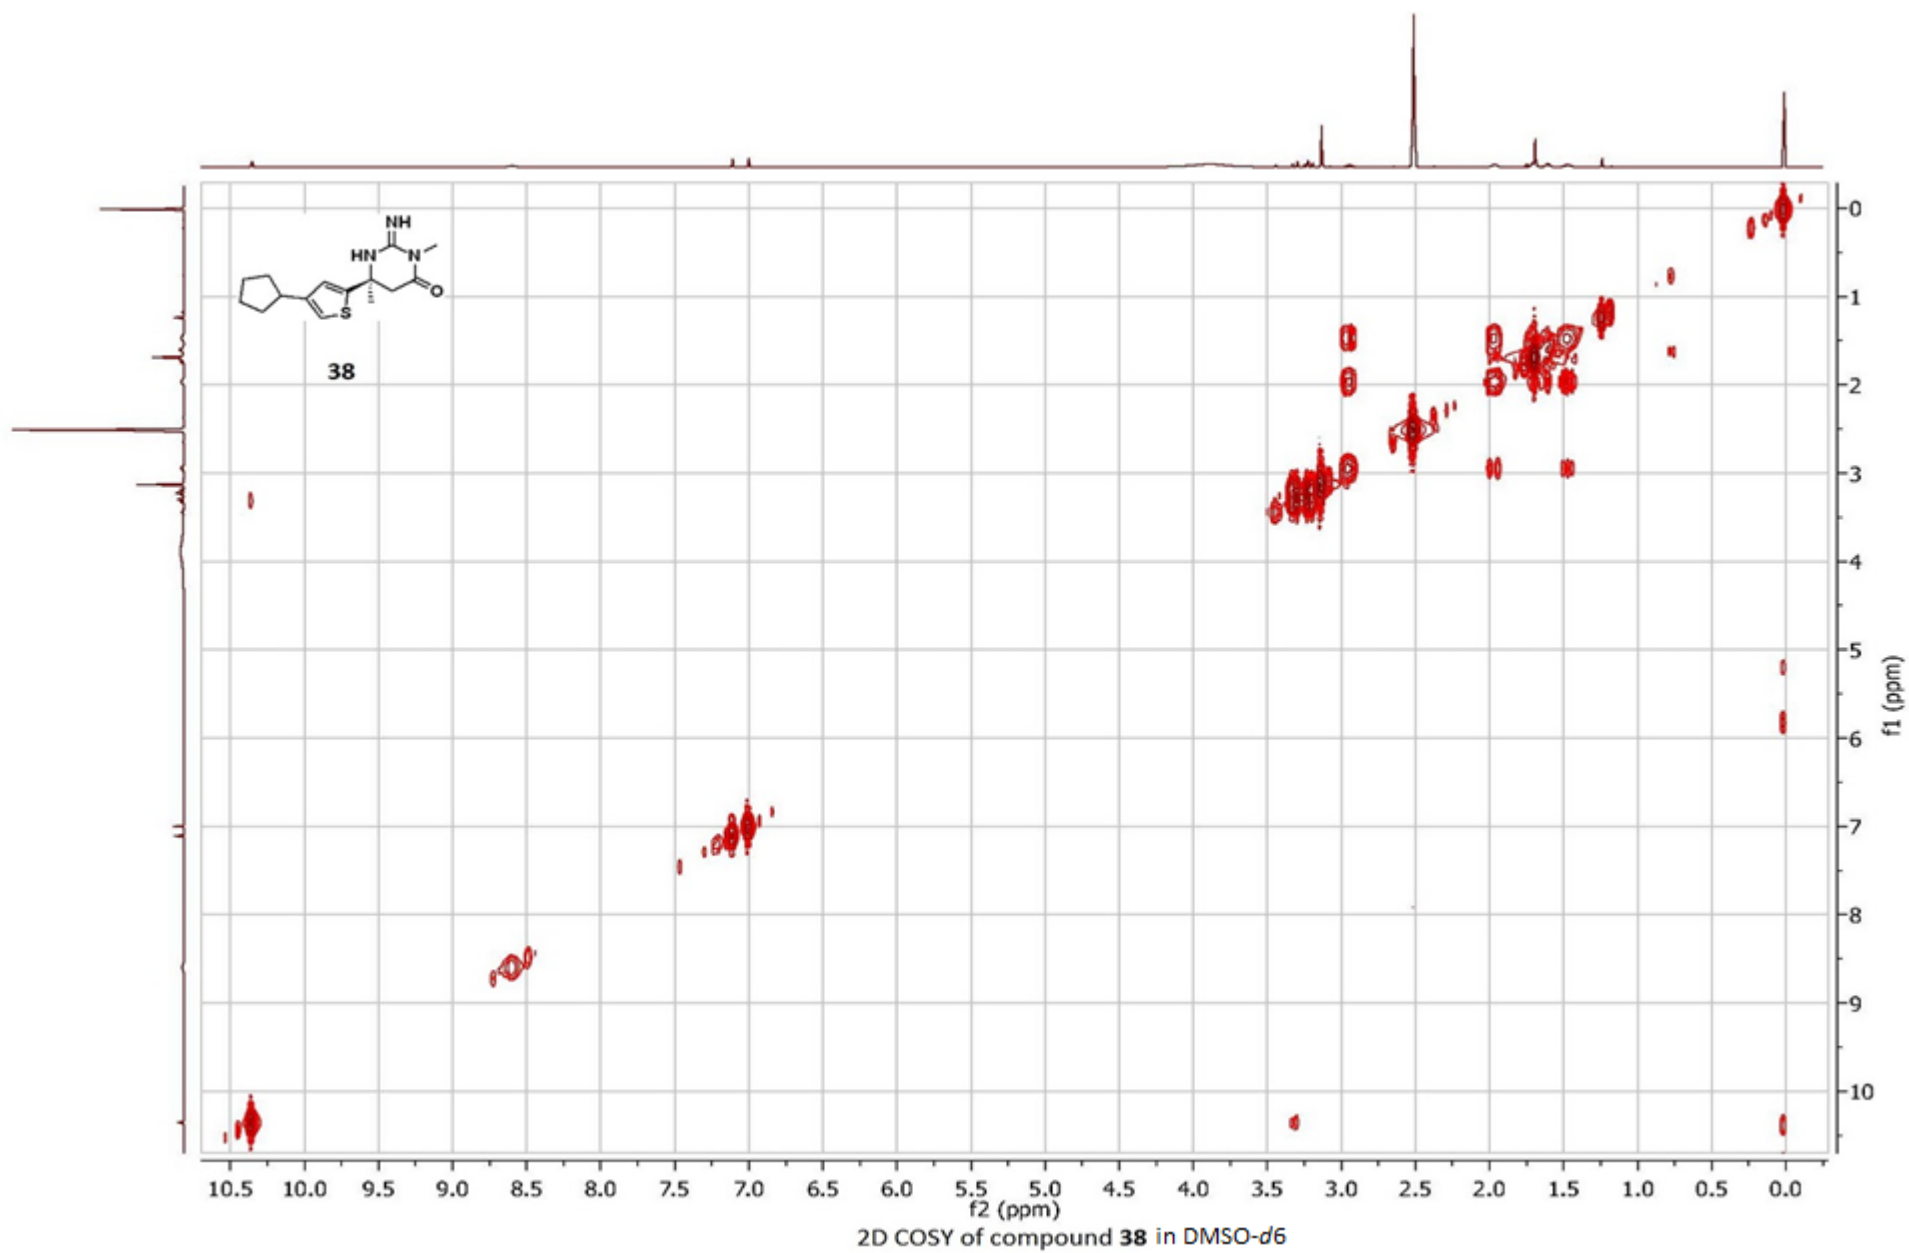

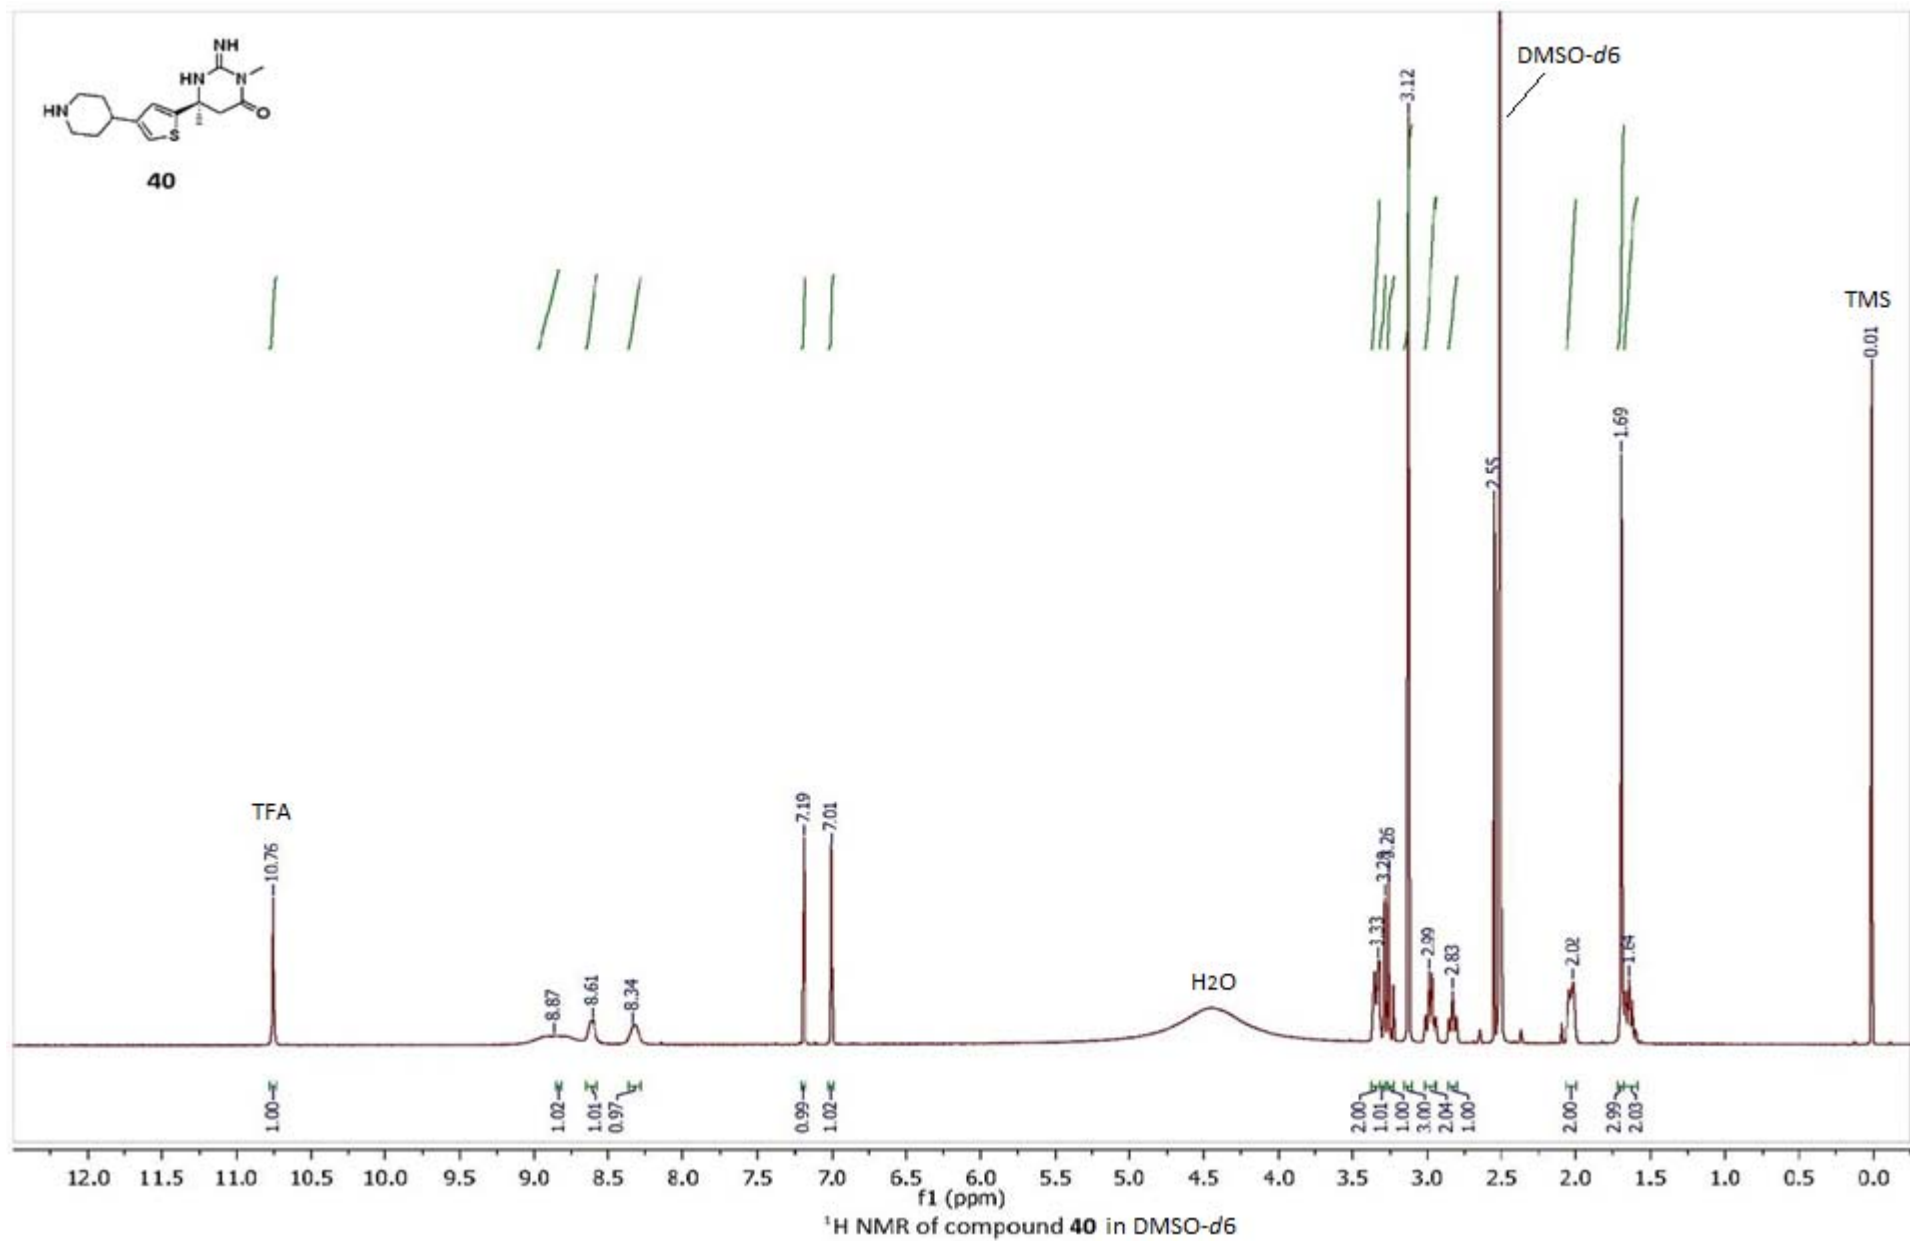

S136



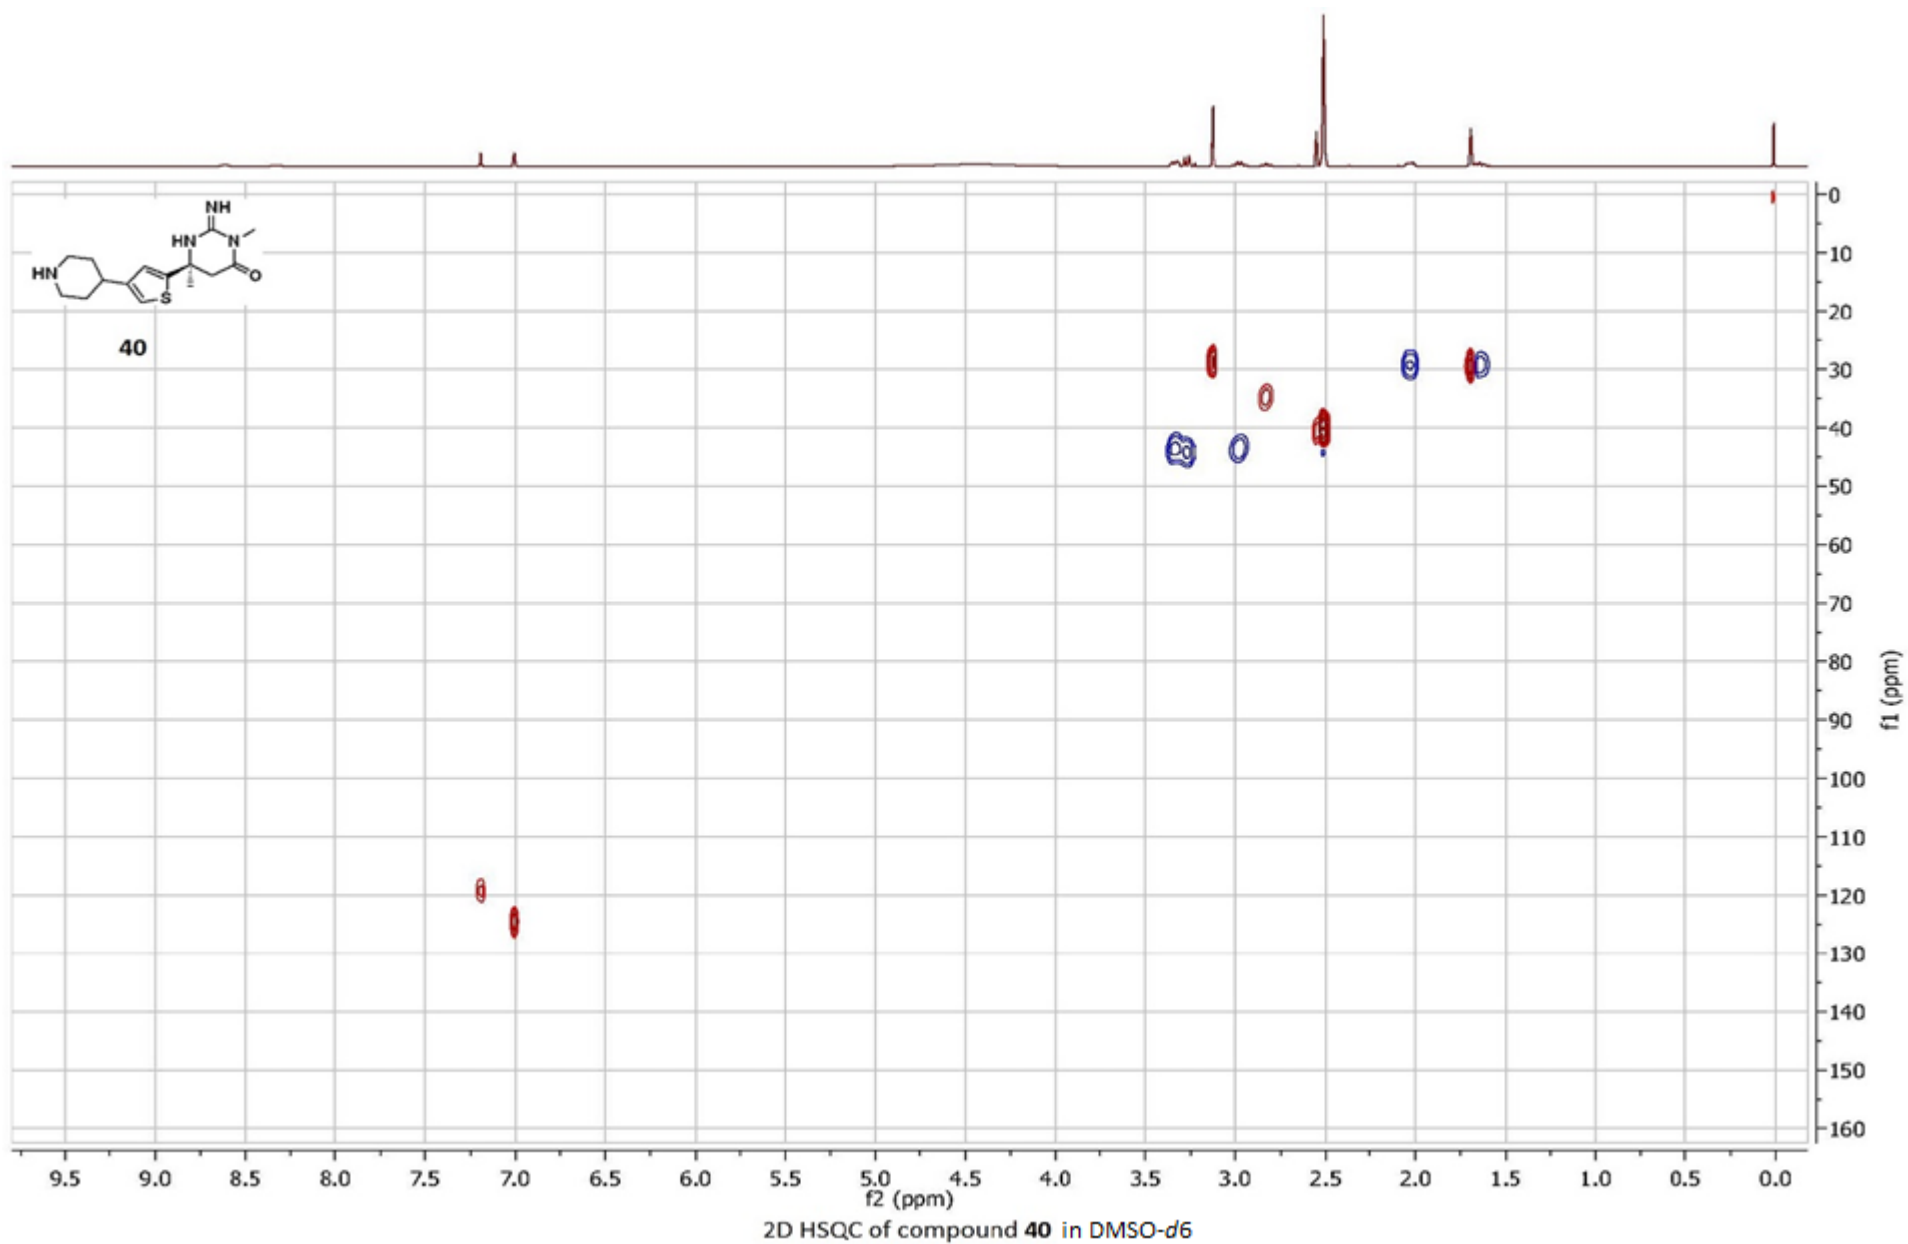

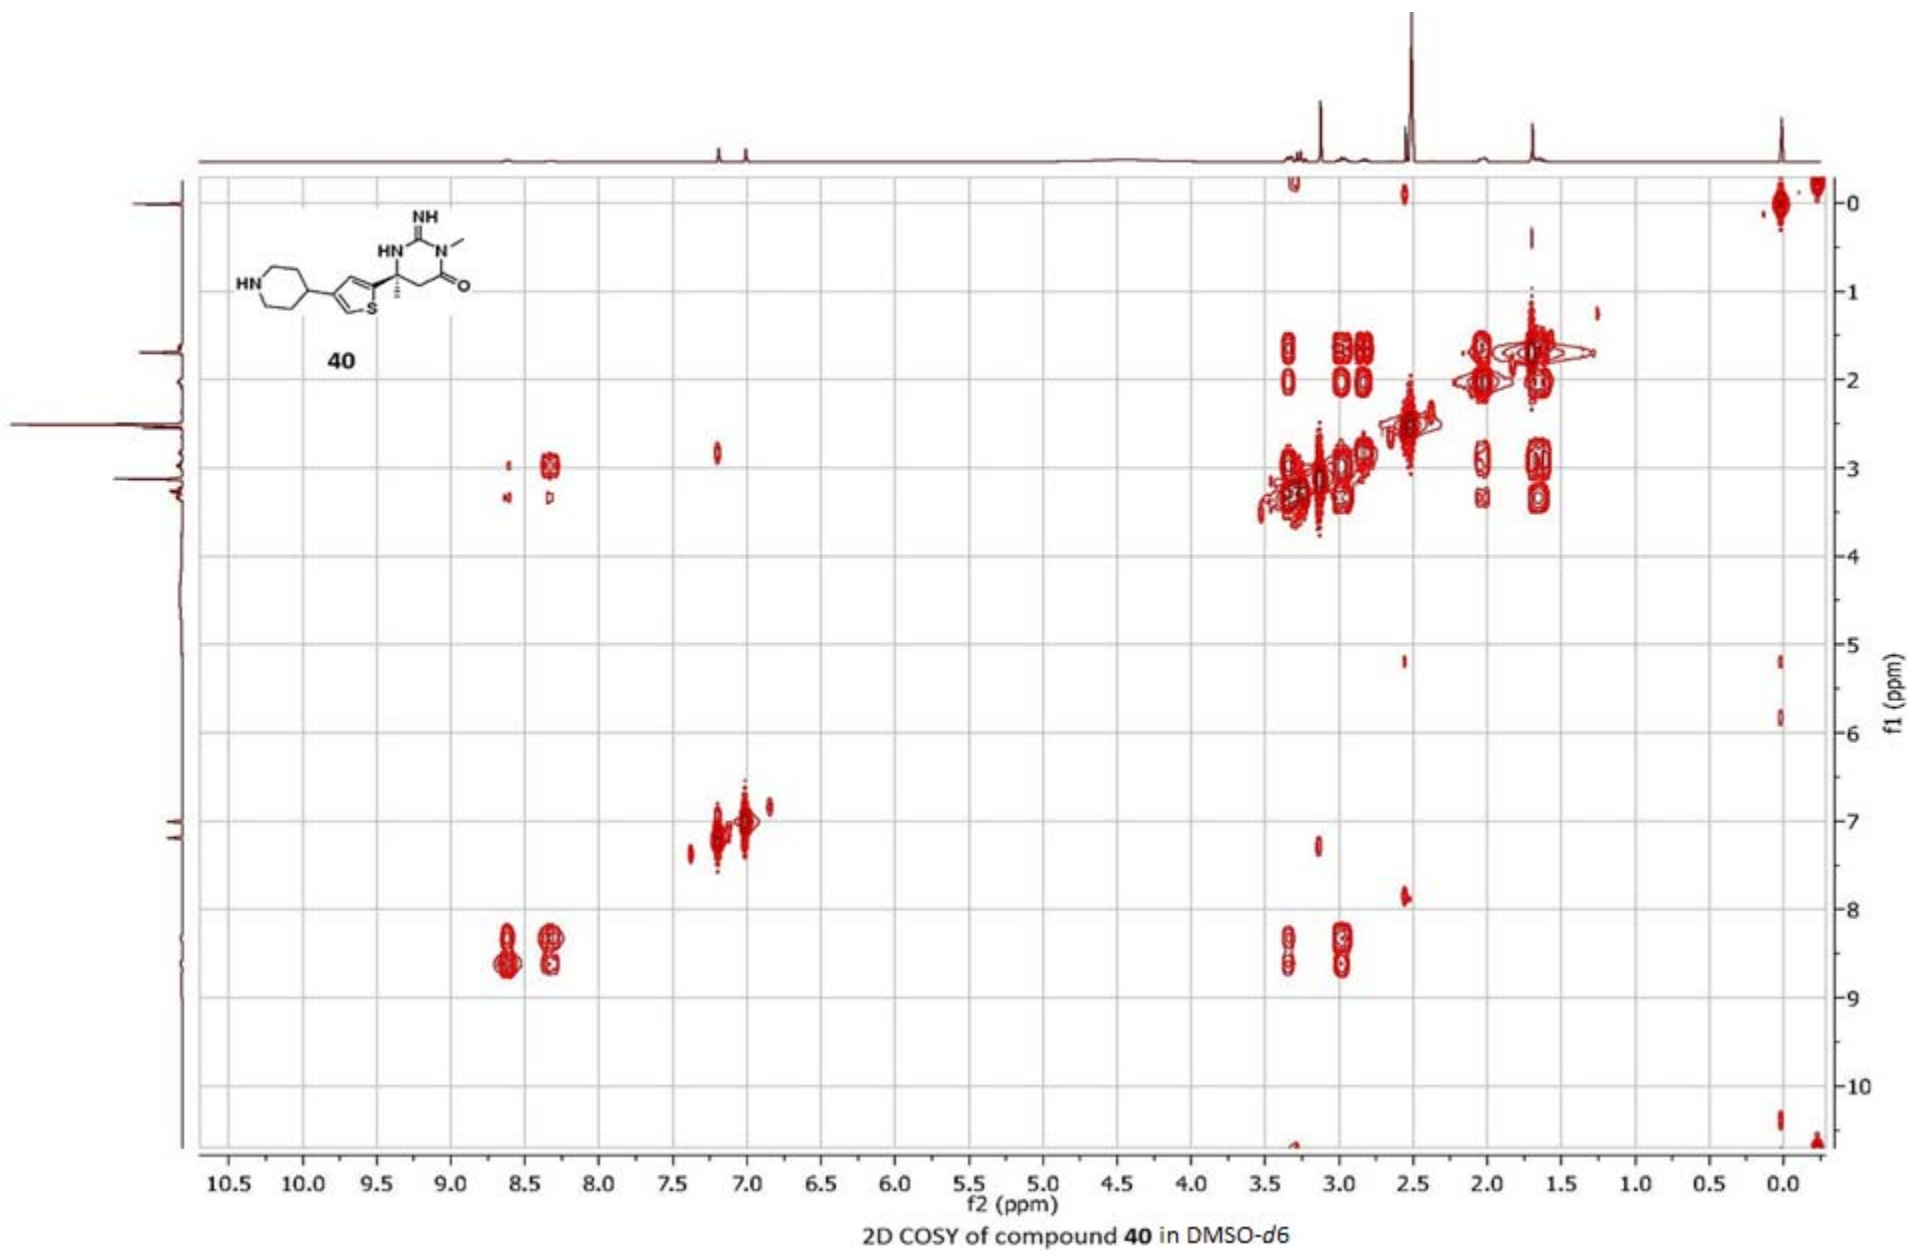

S138

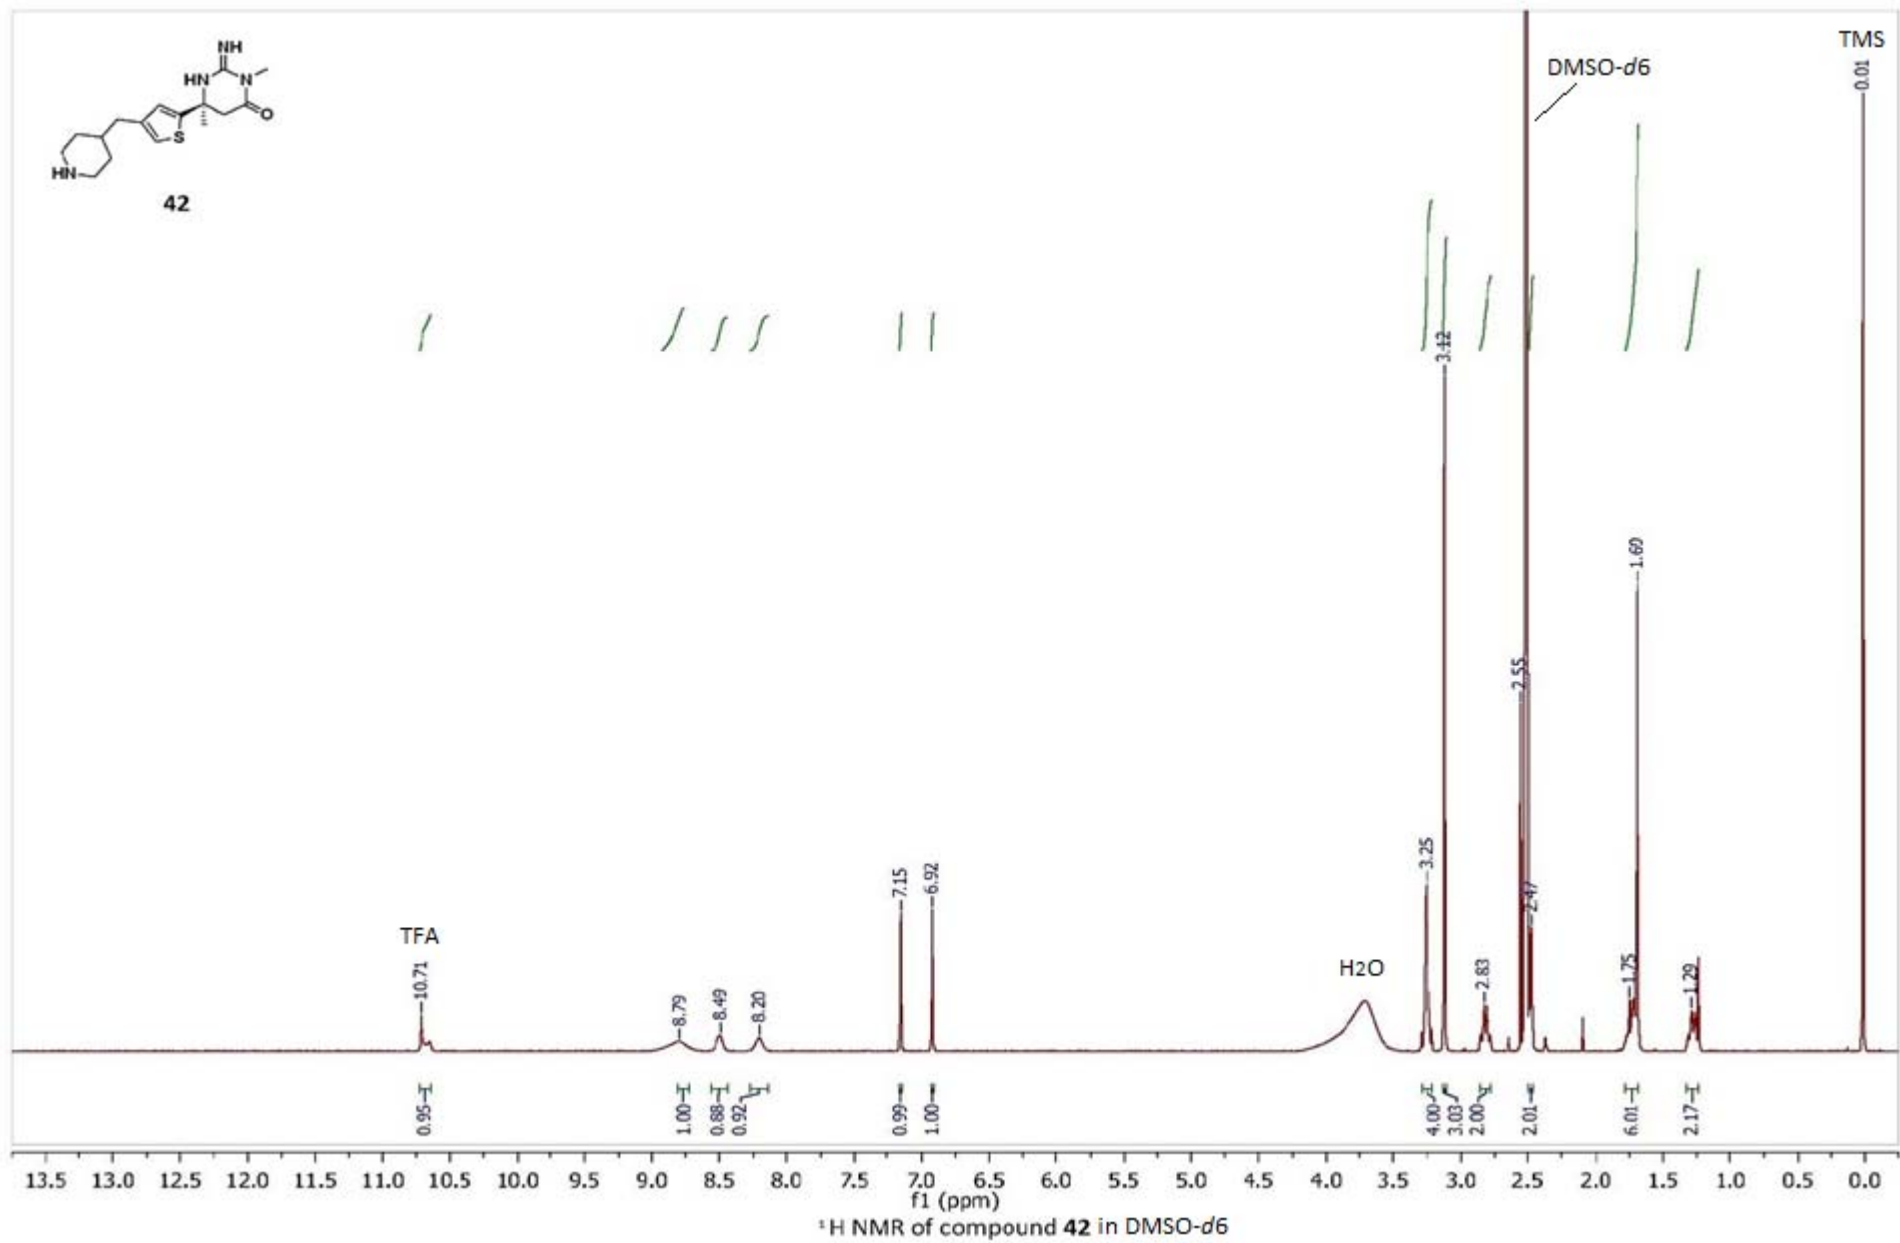

S139

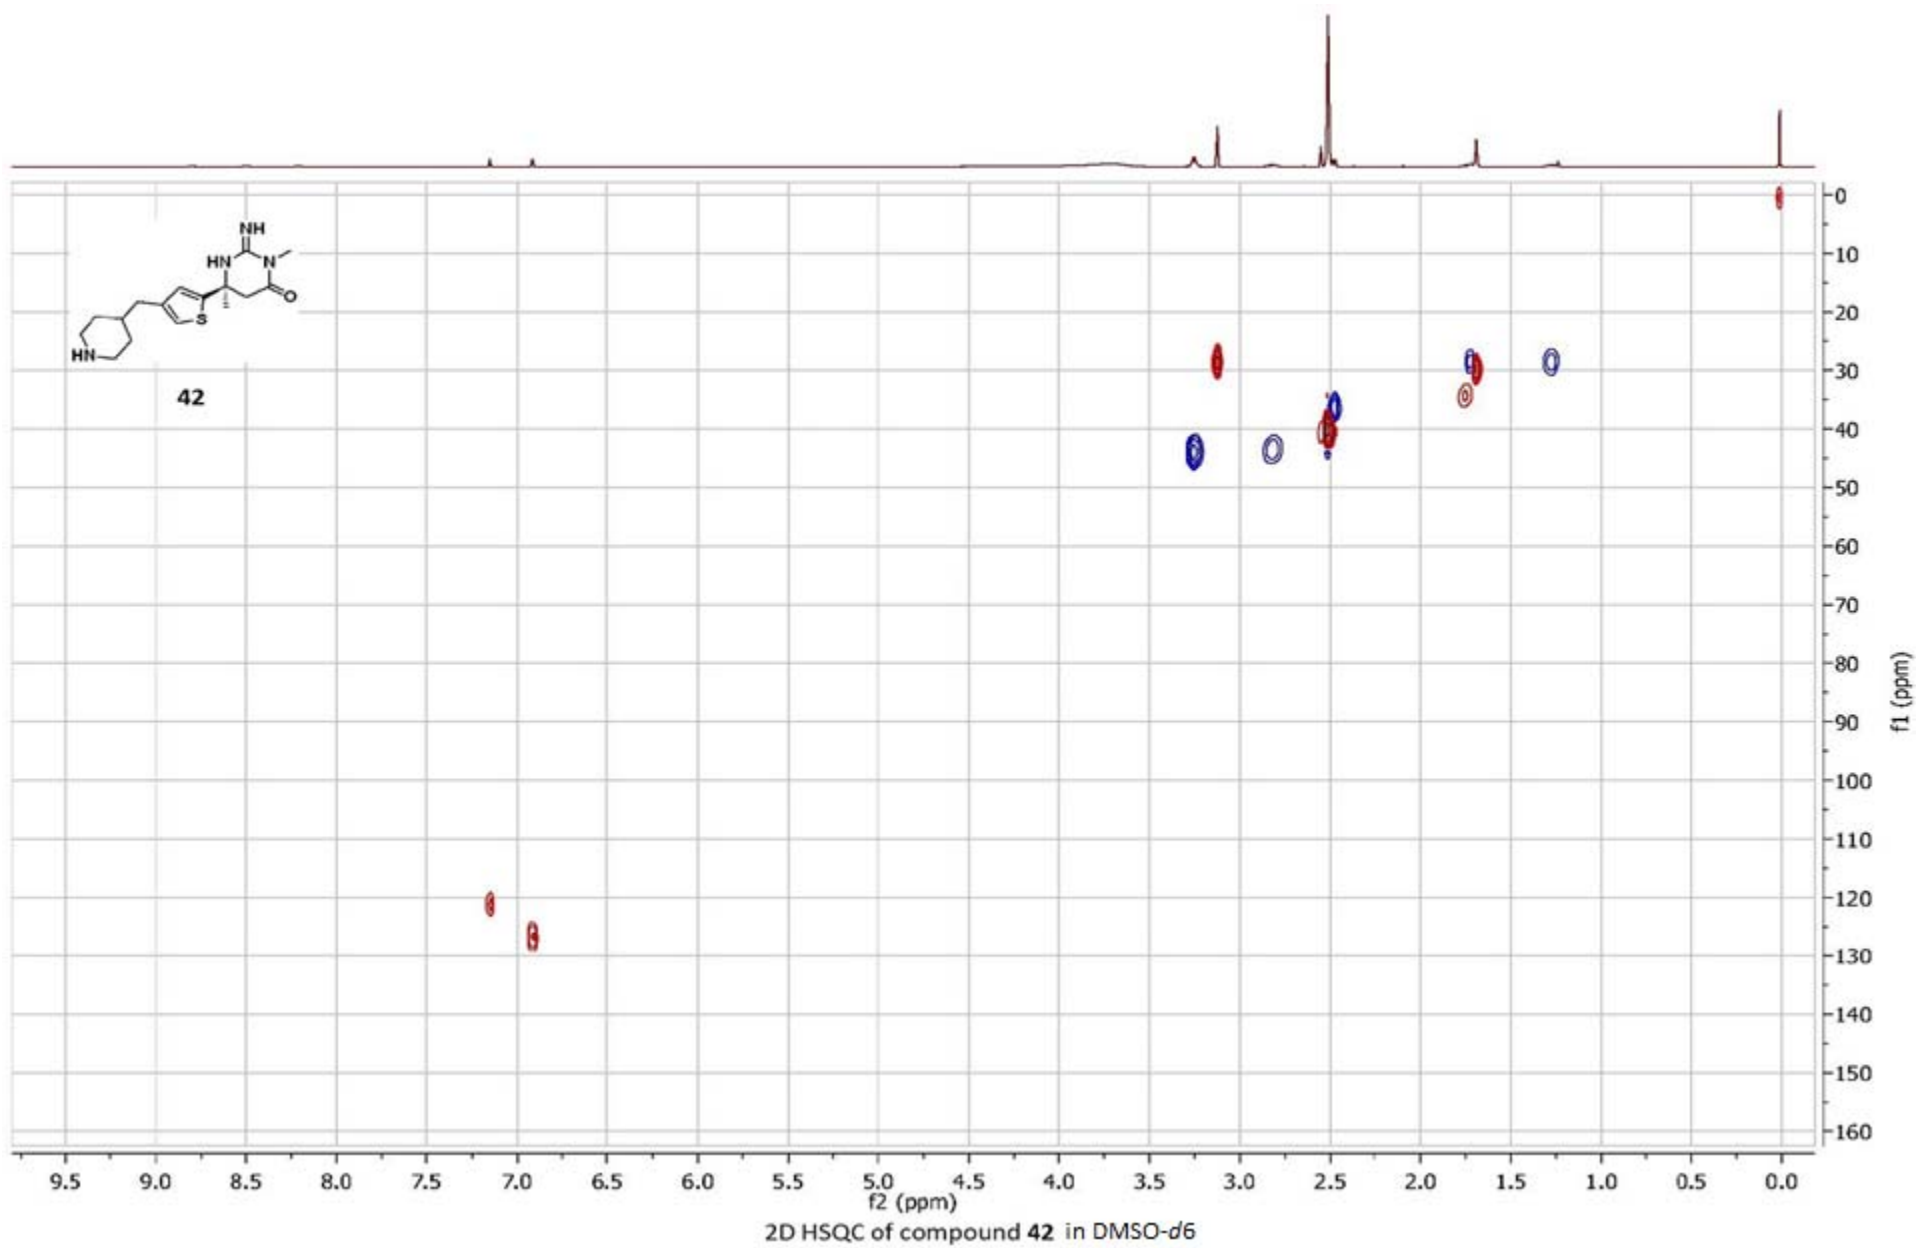

S140

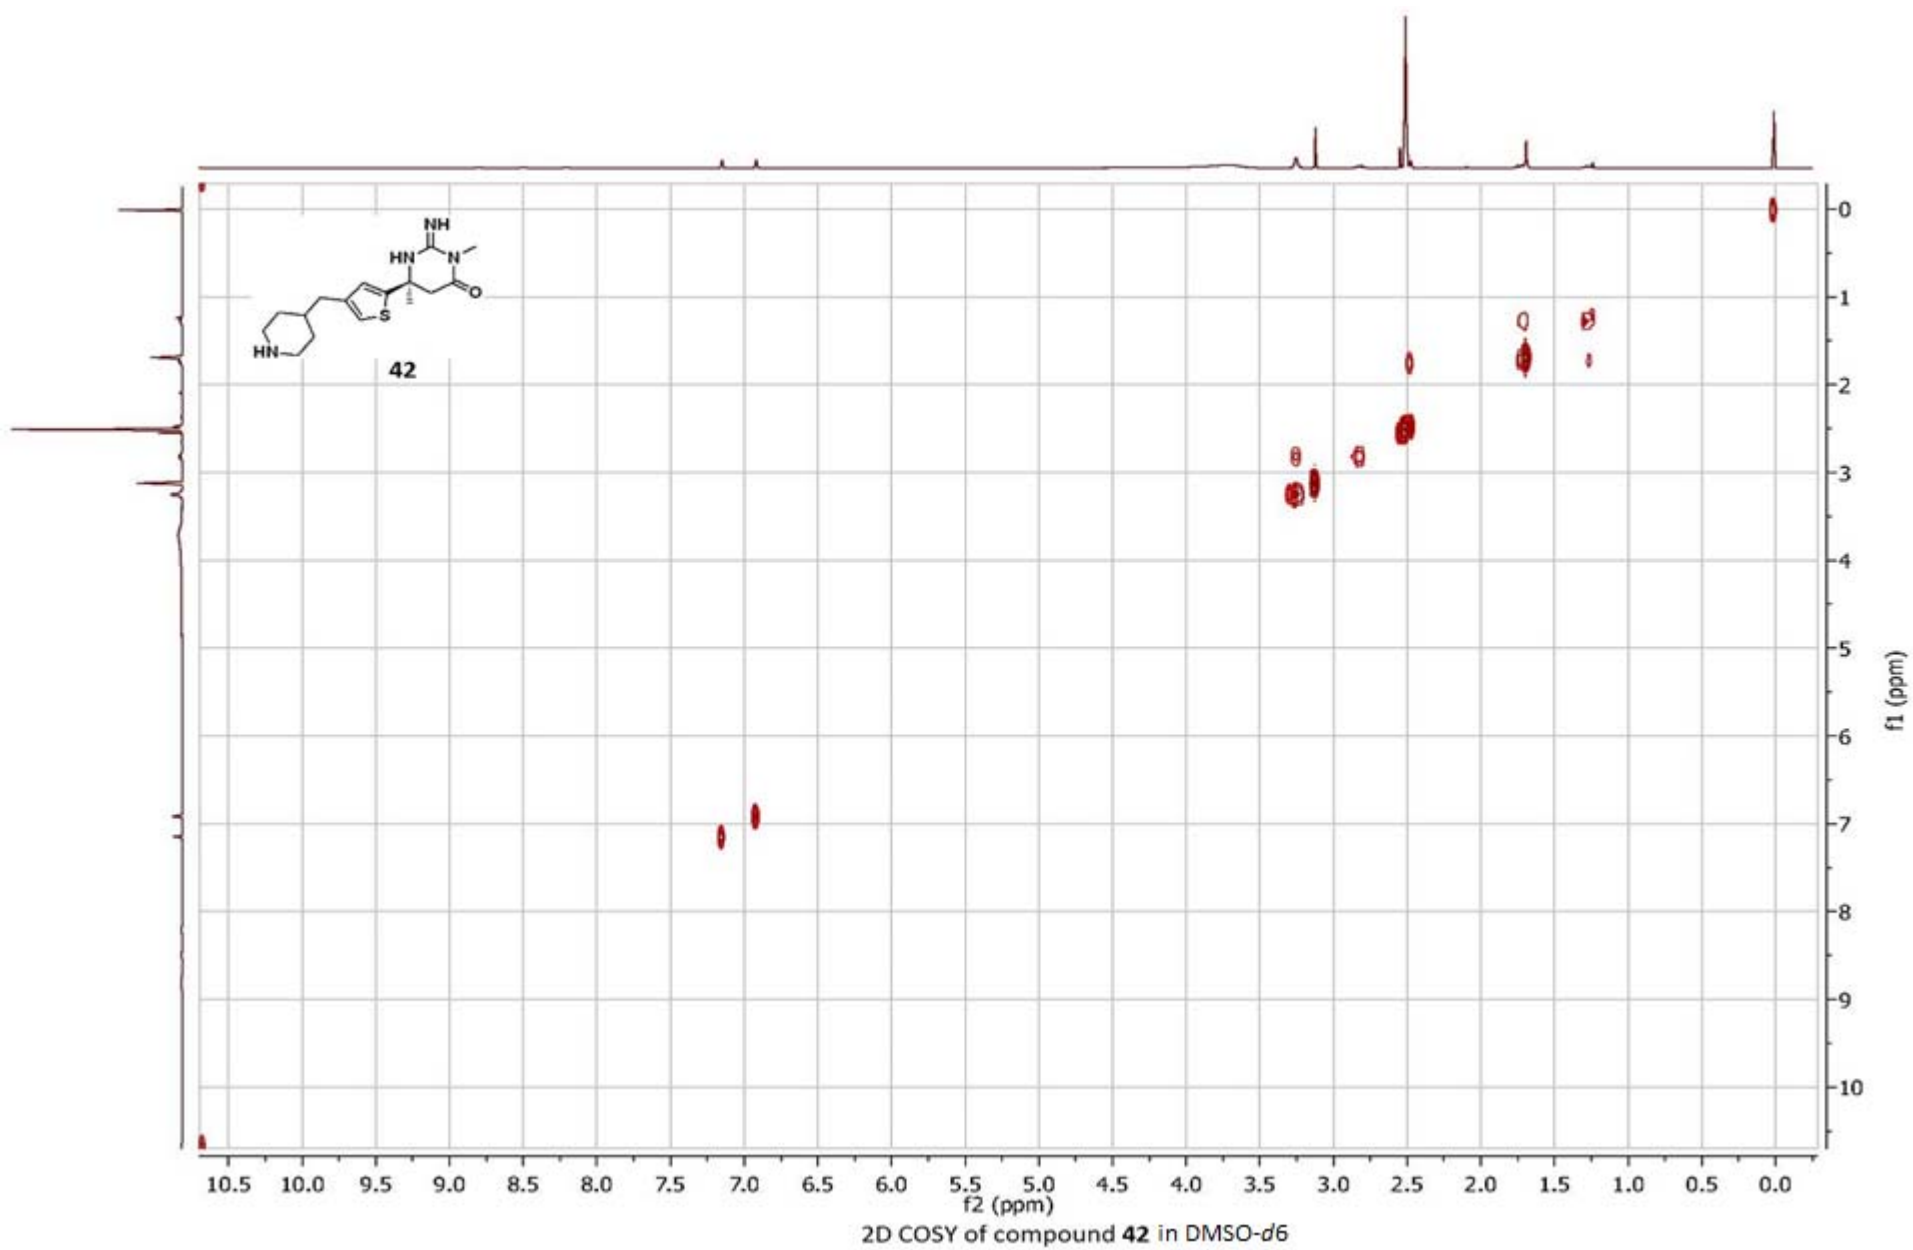

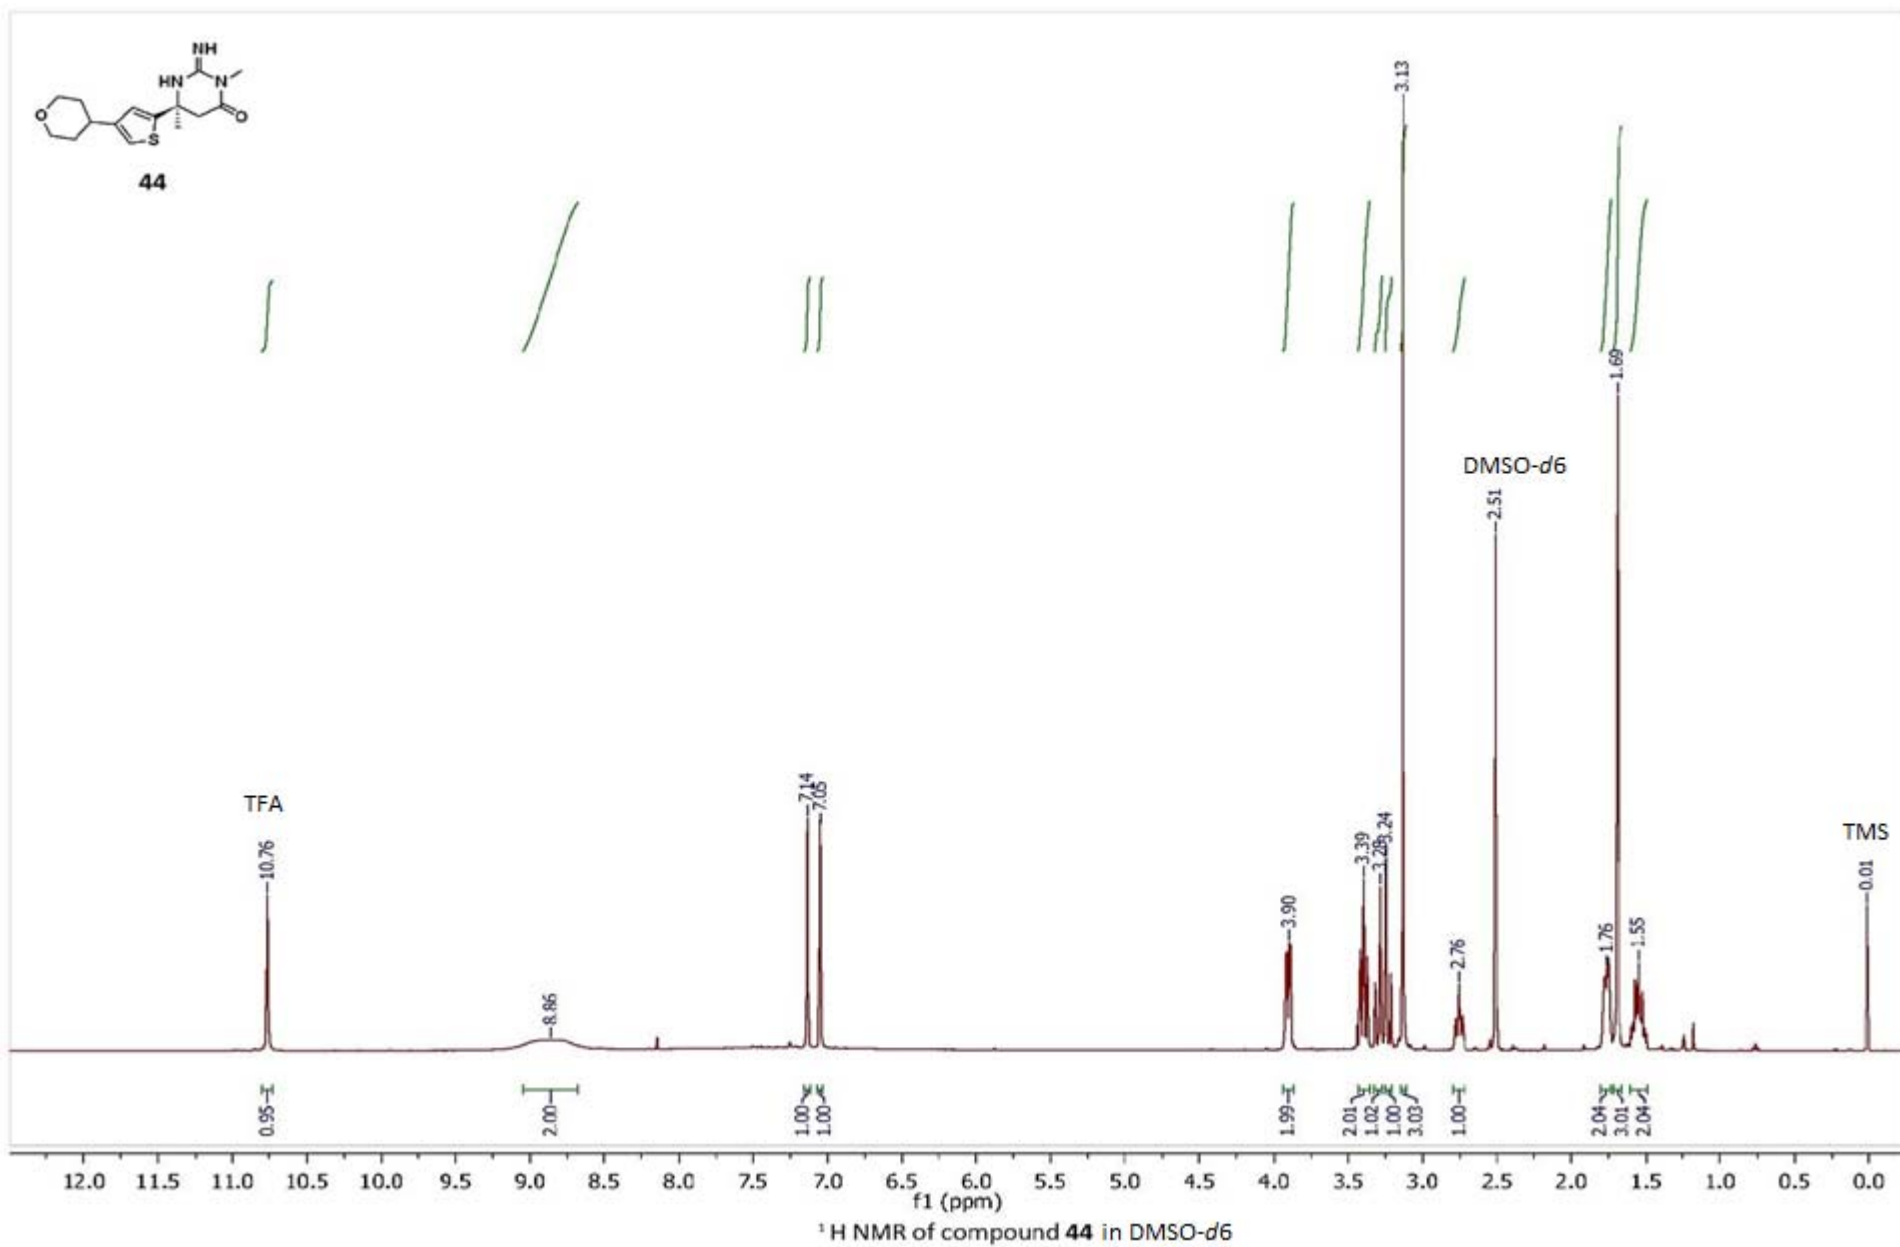

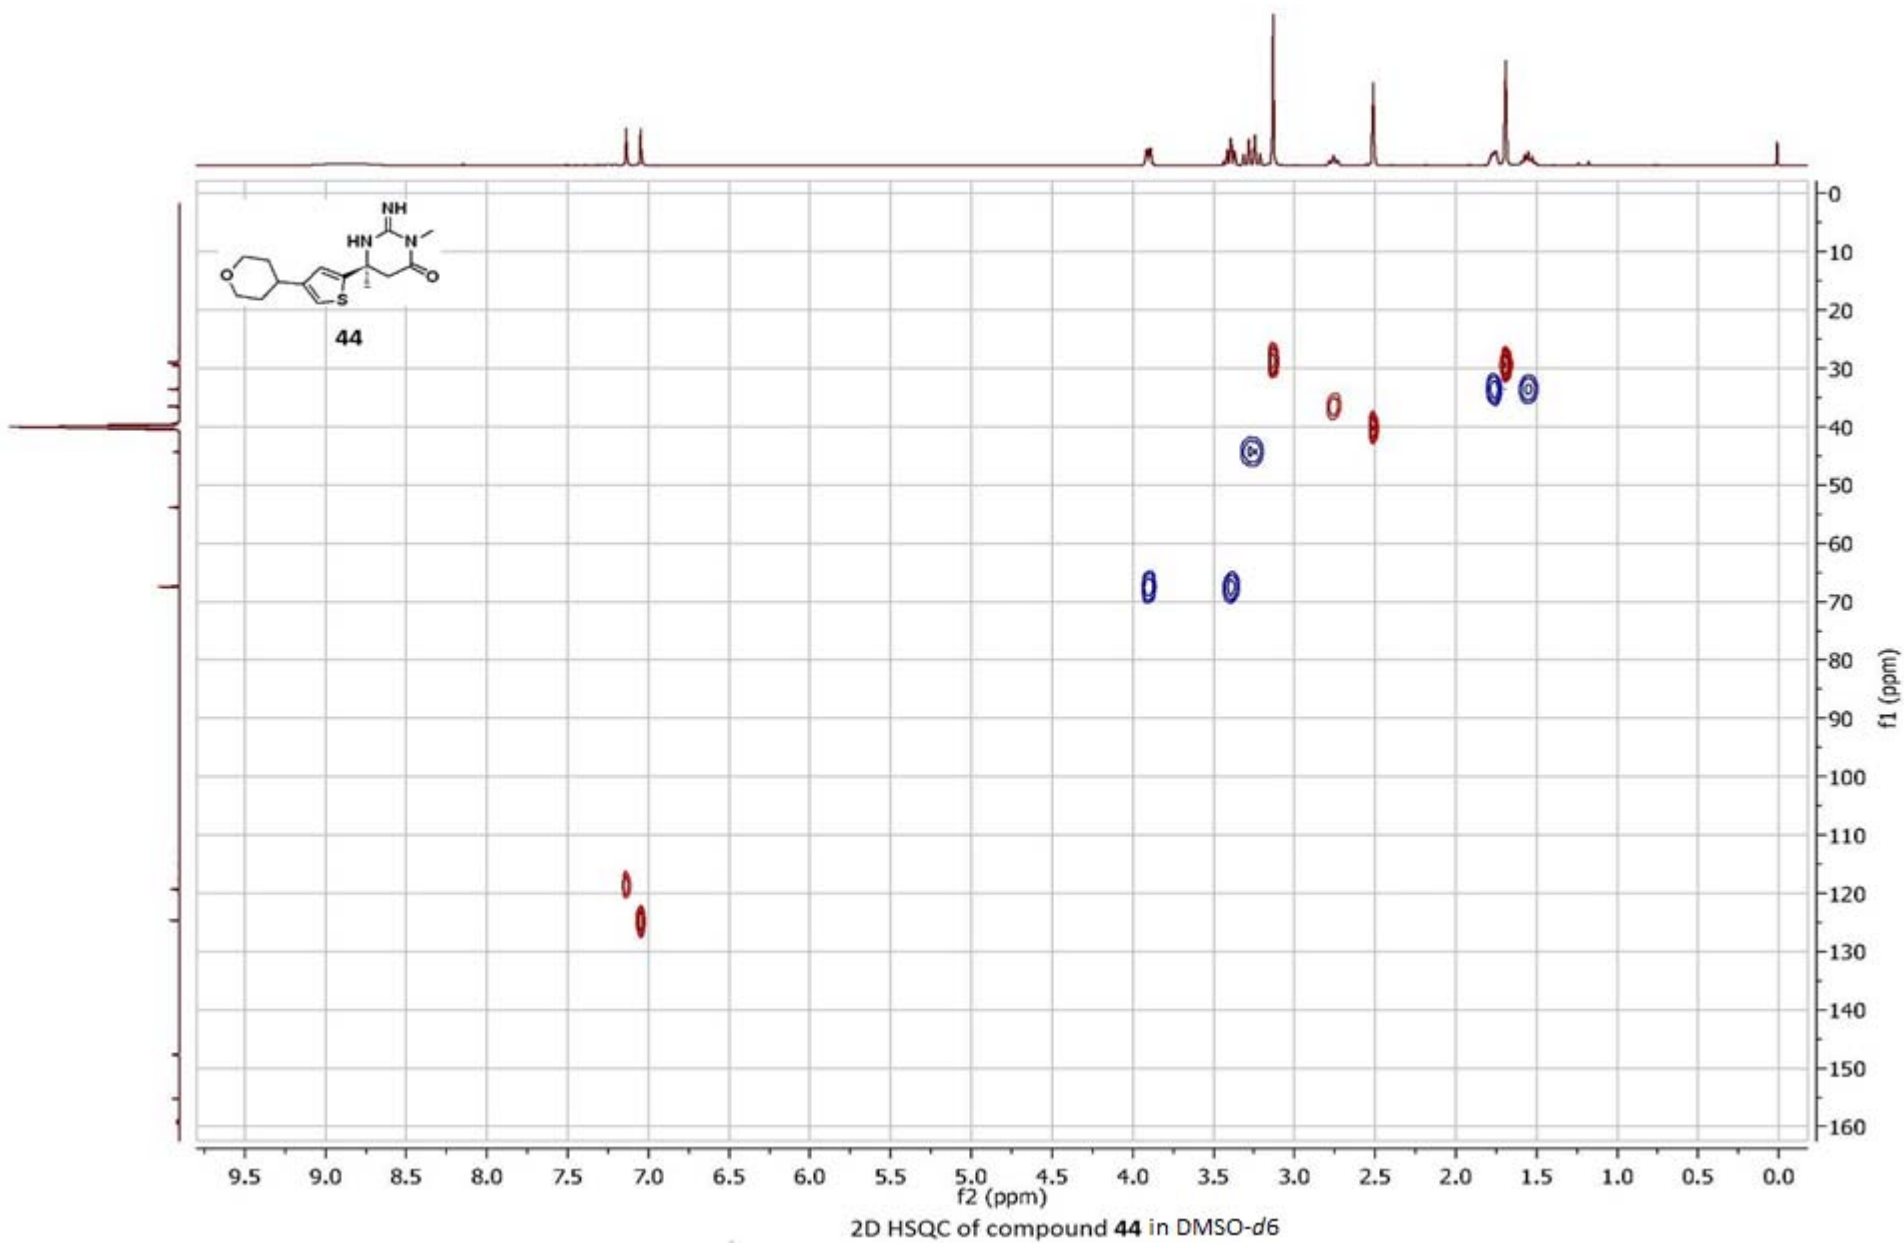





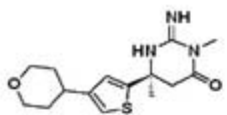

44

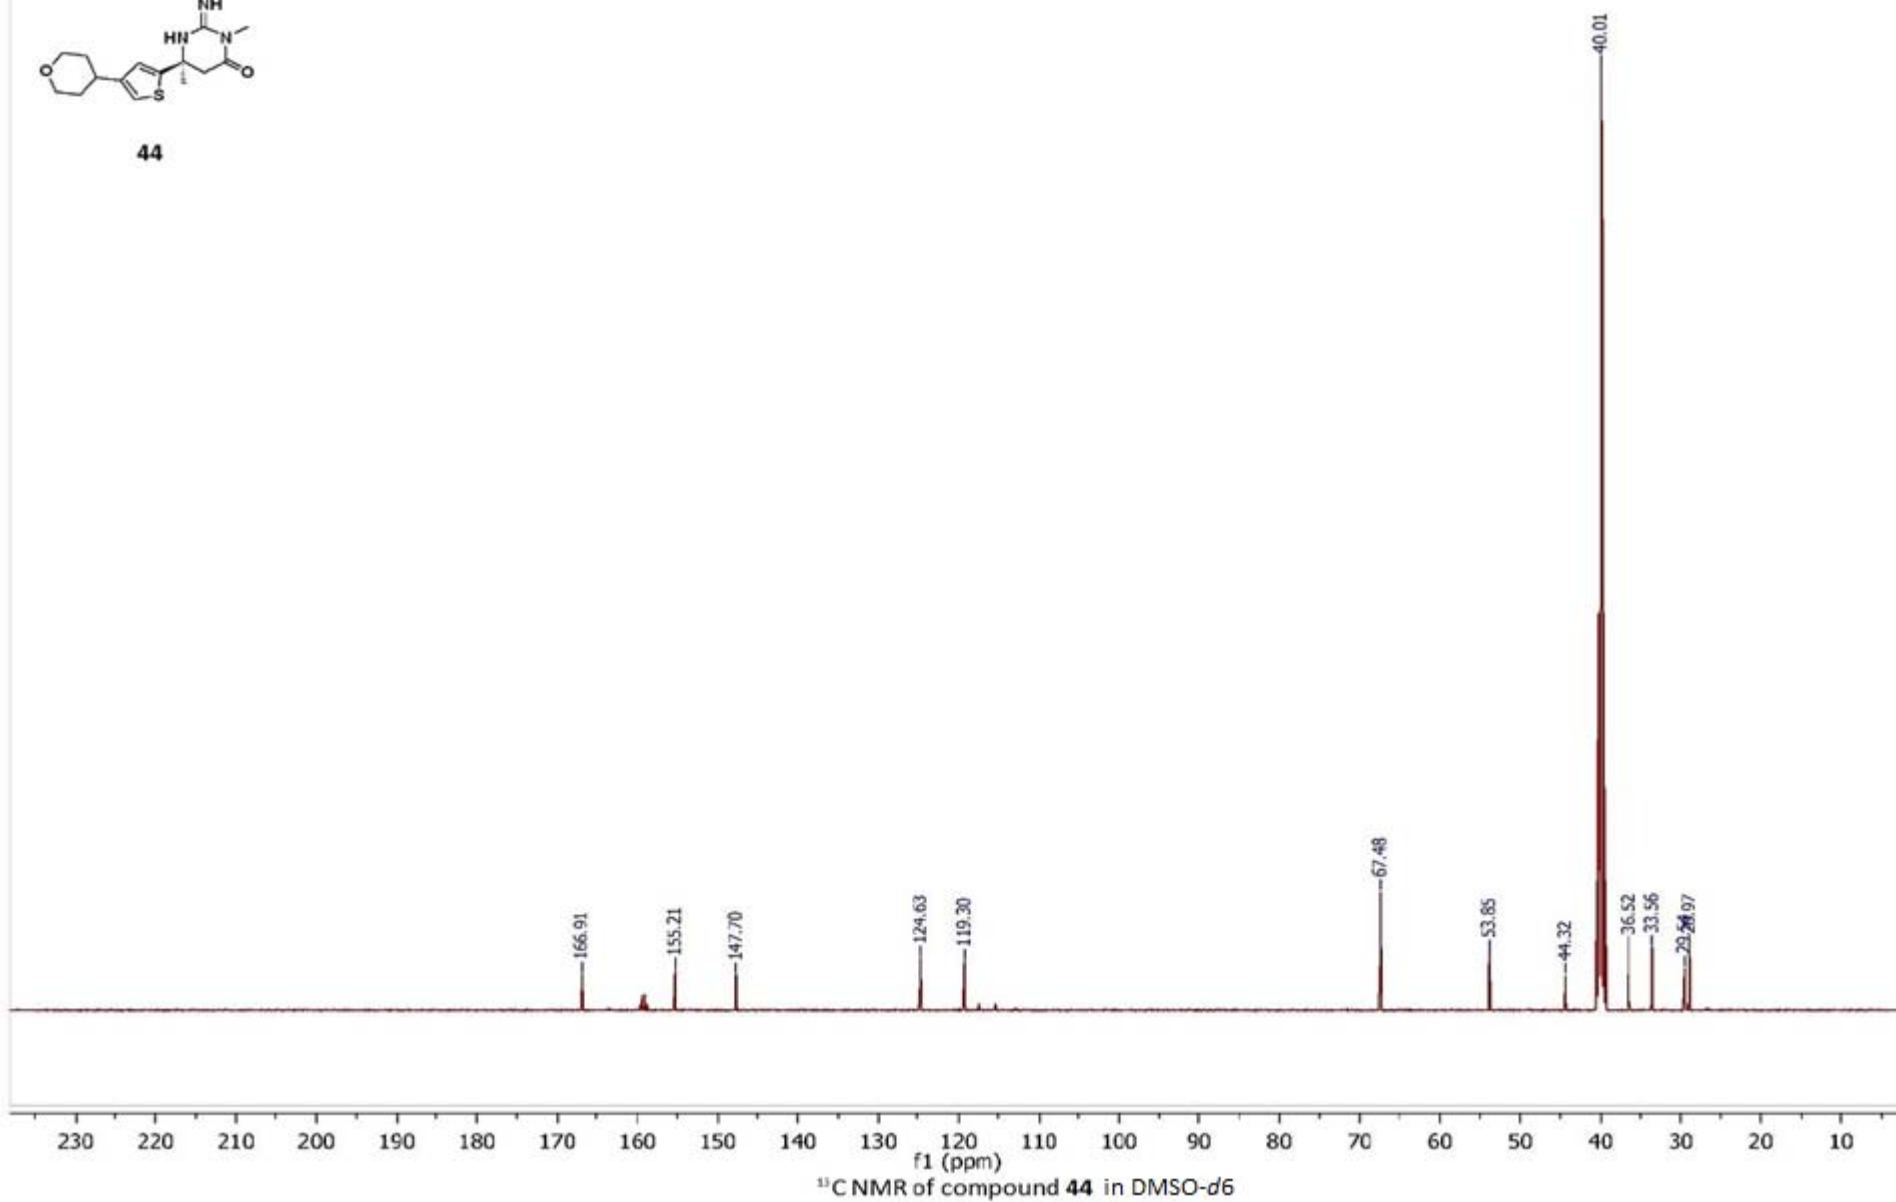

S145

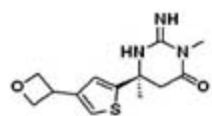

46

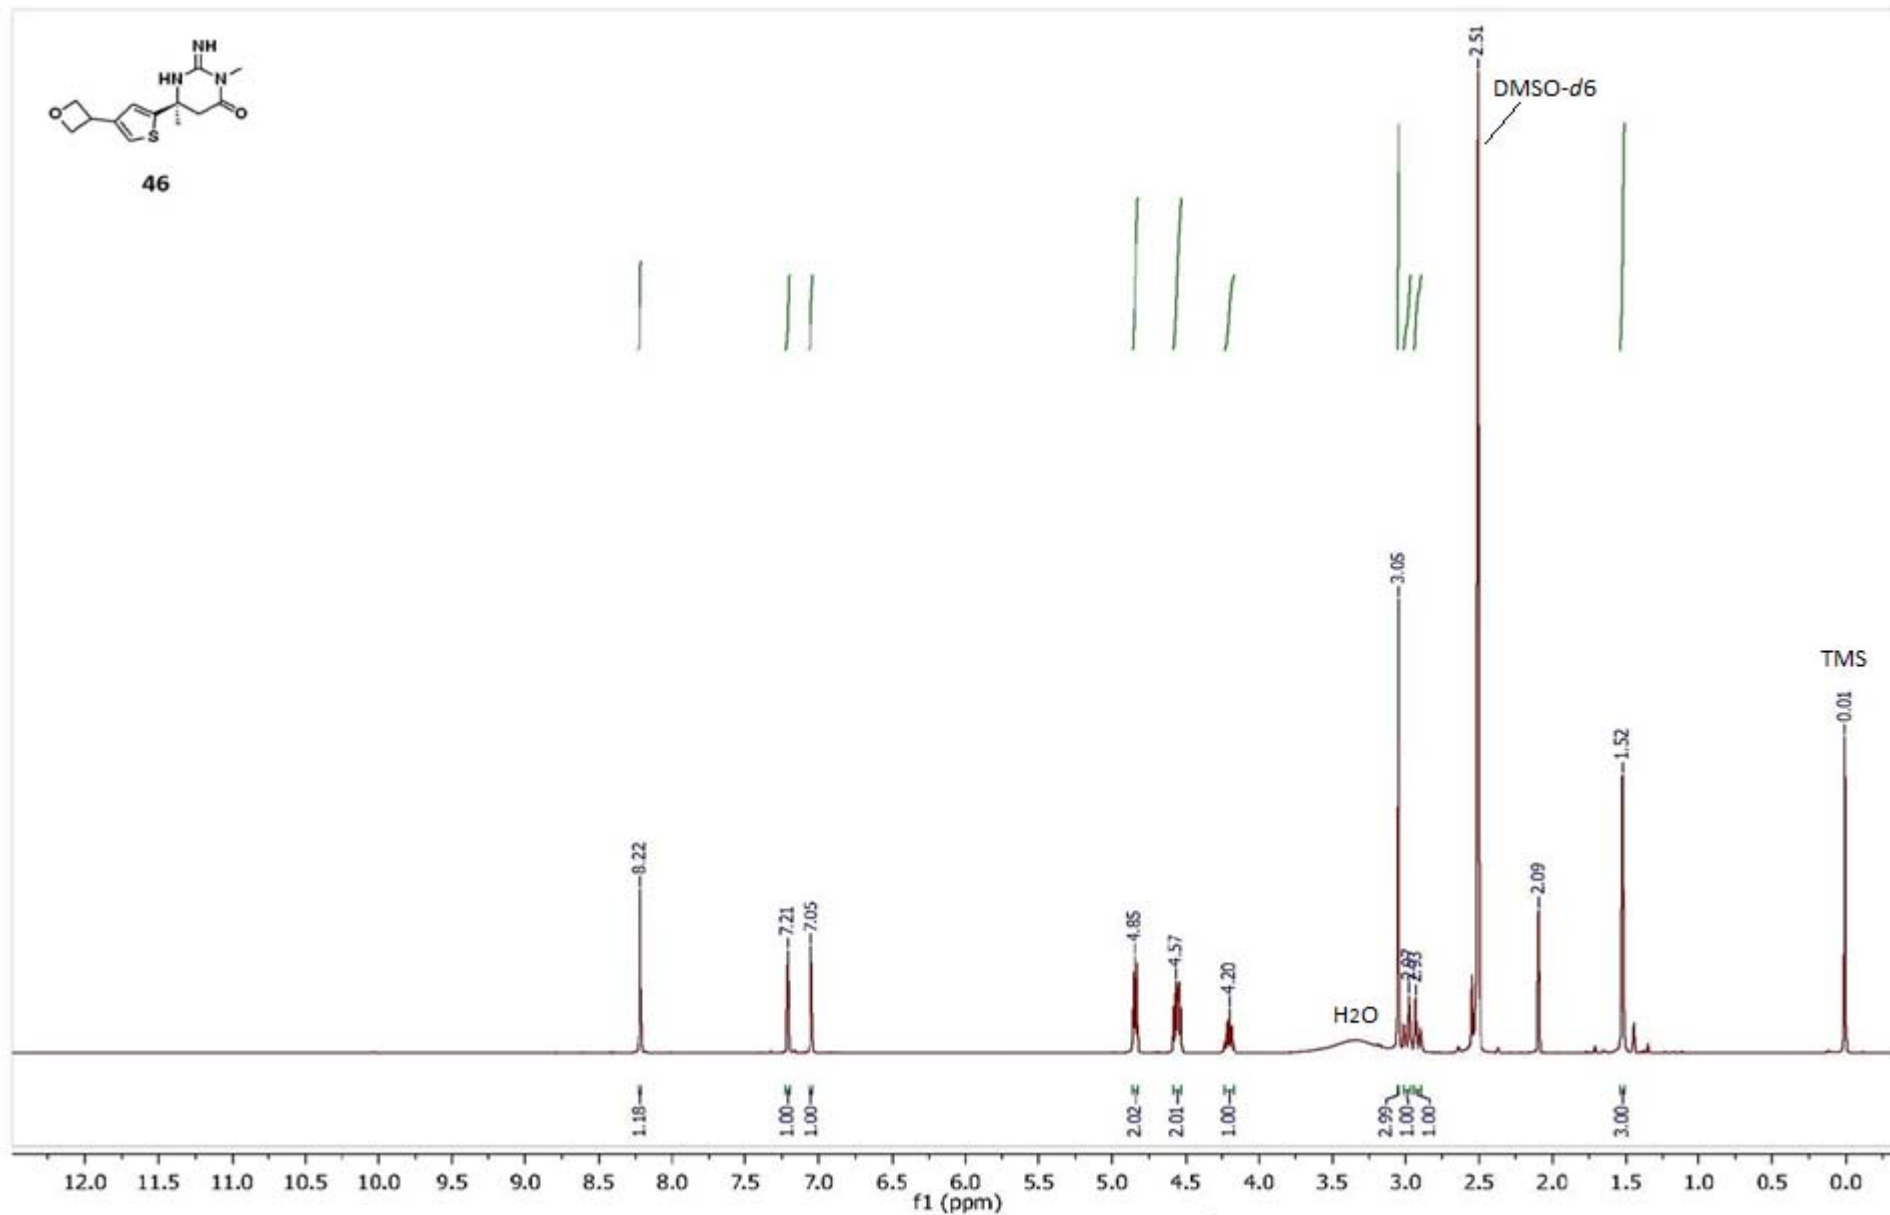

S146

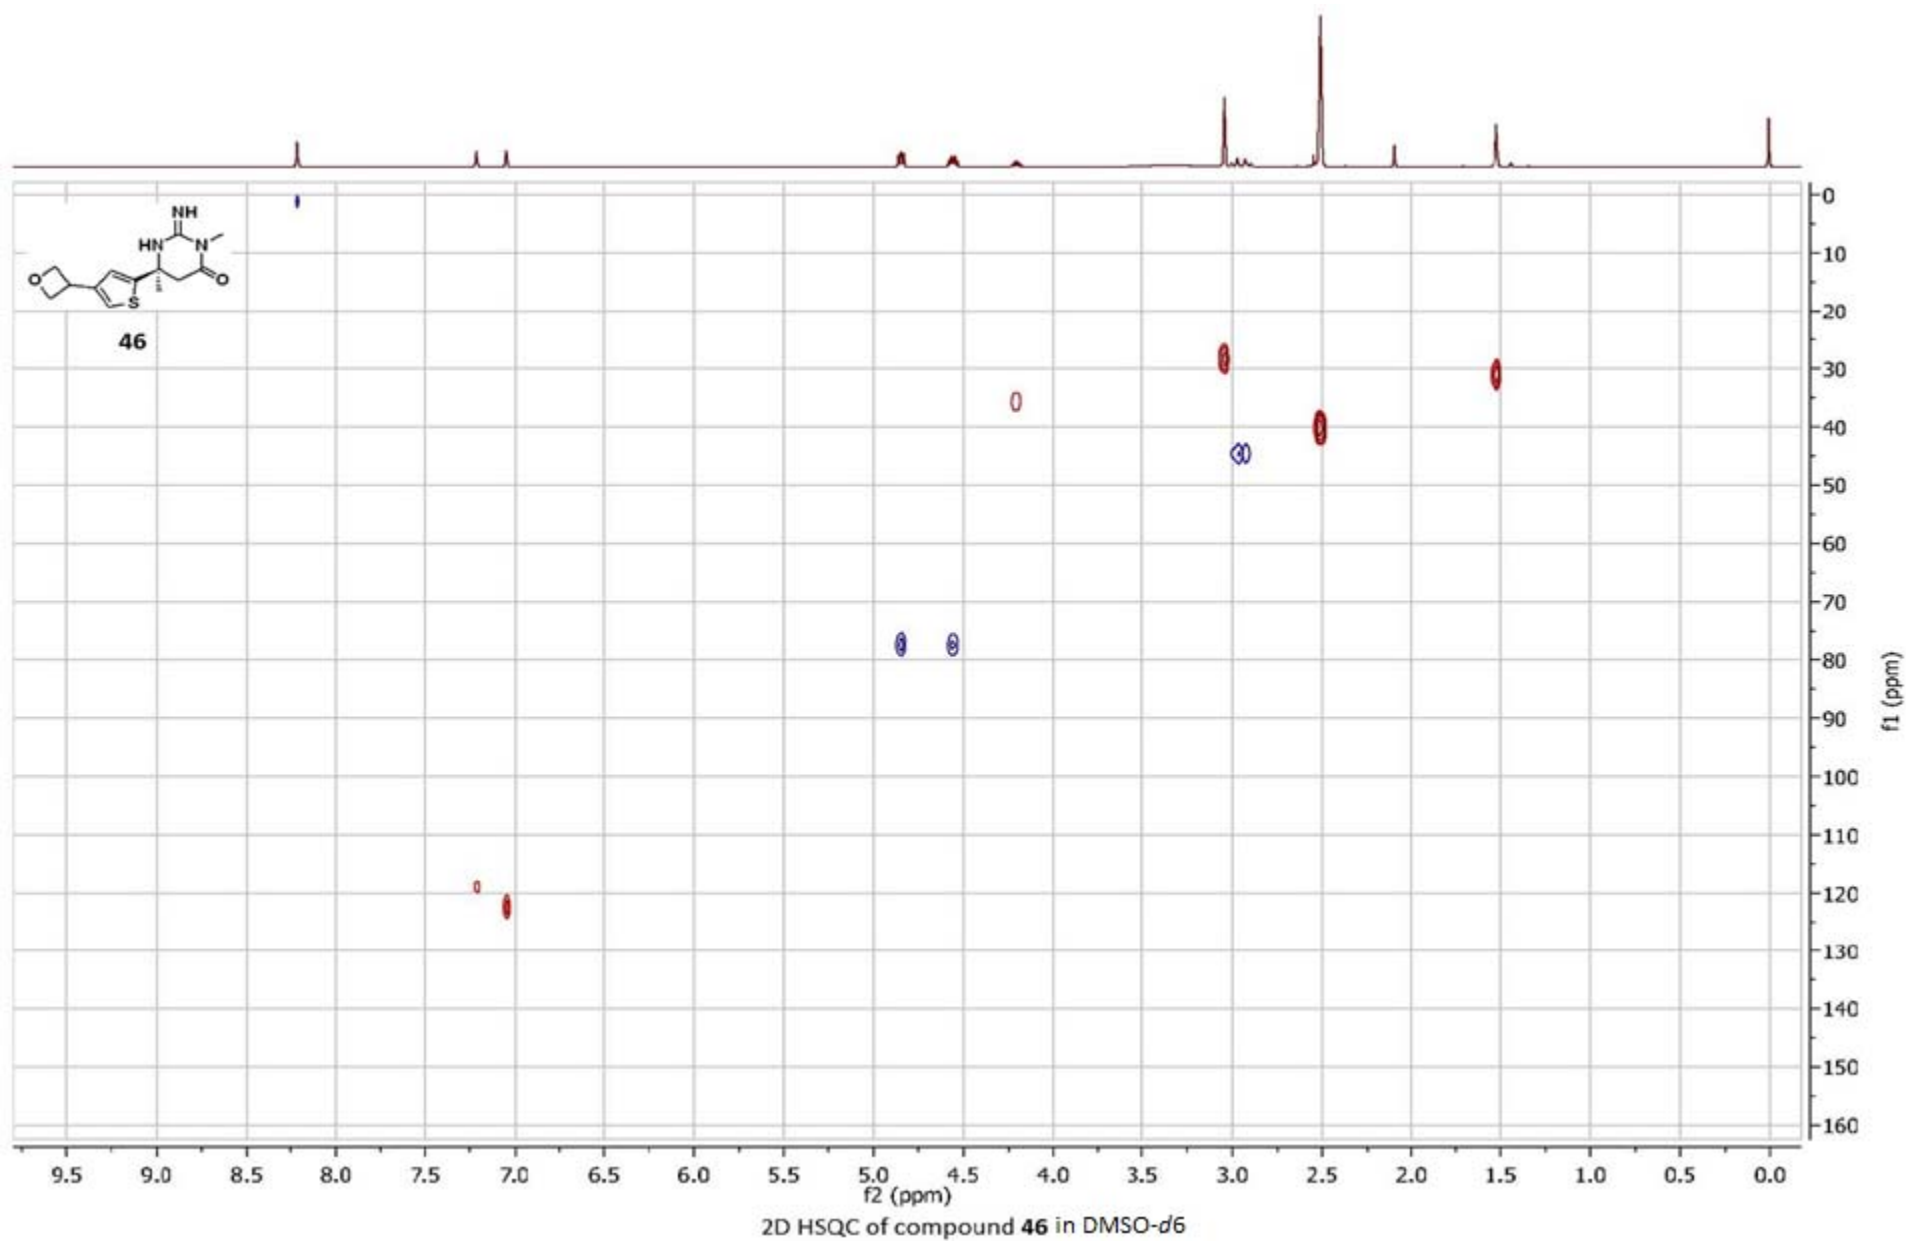

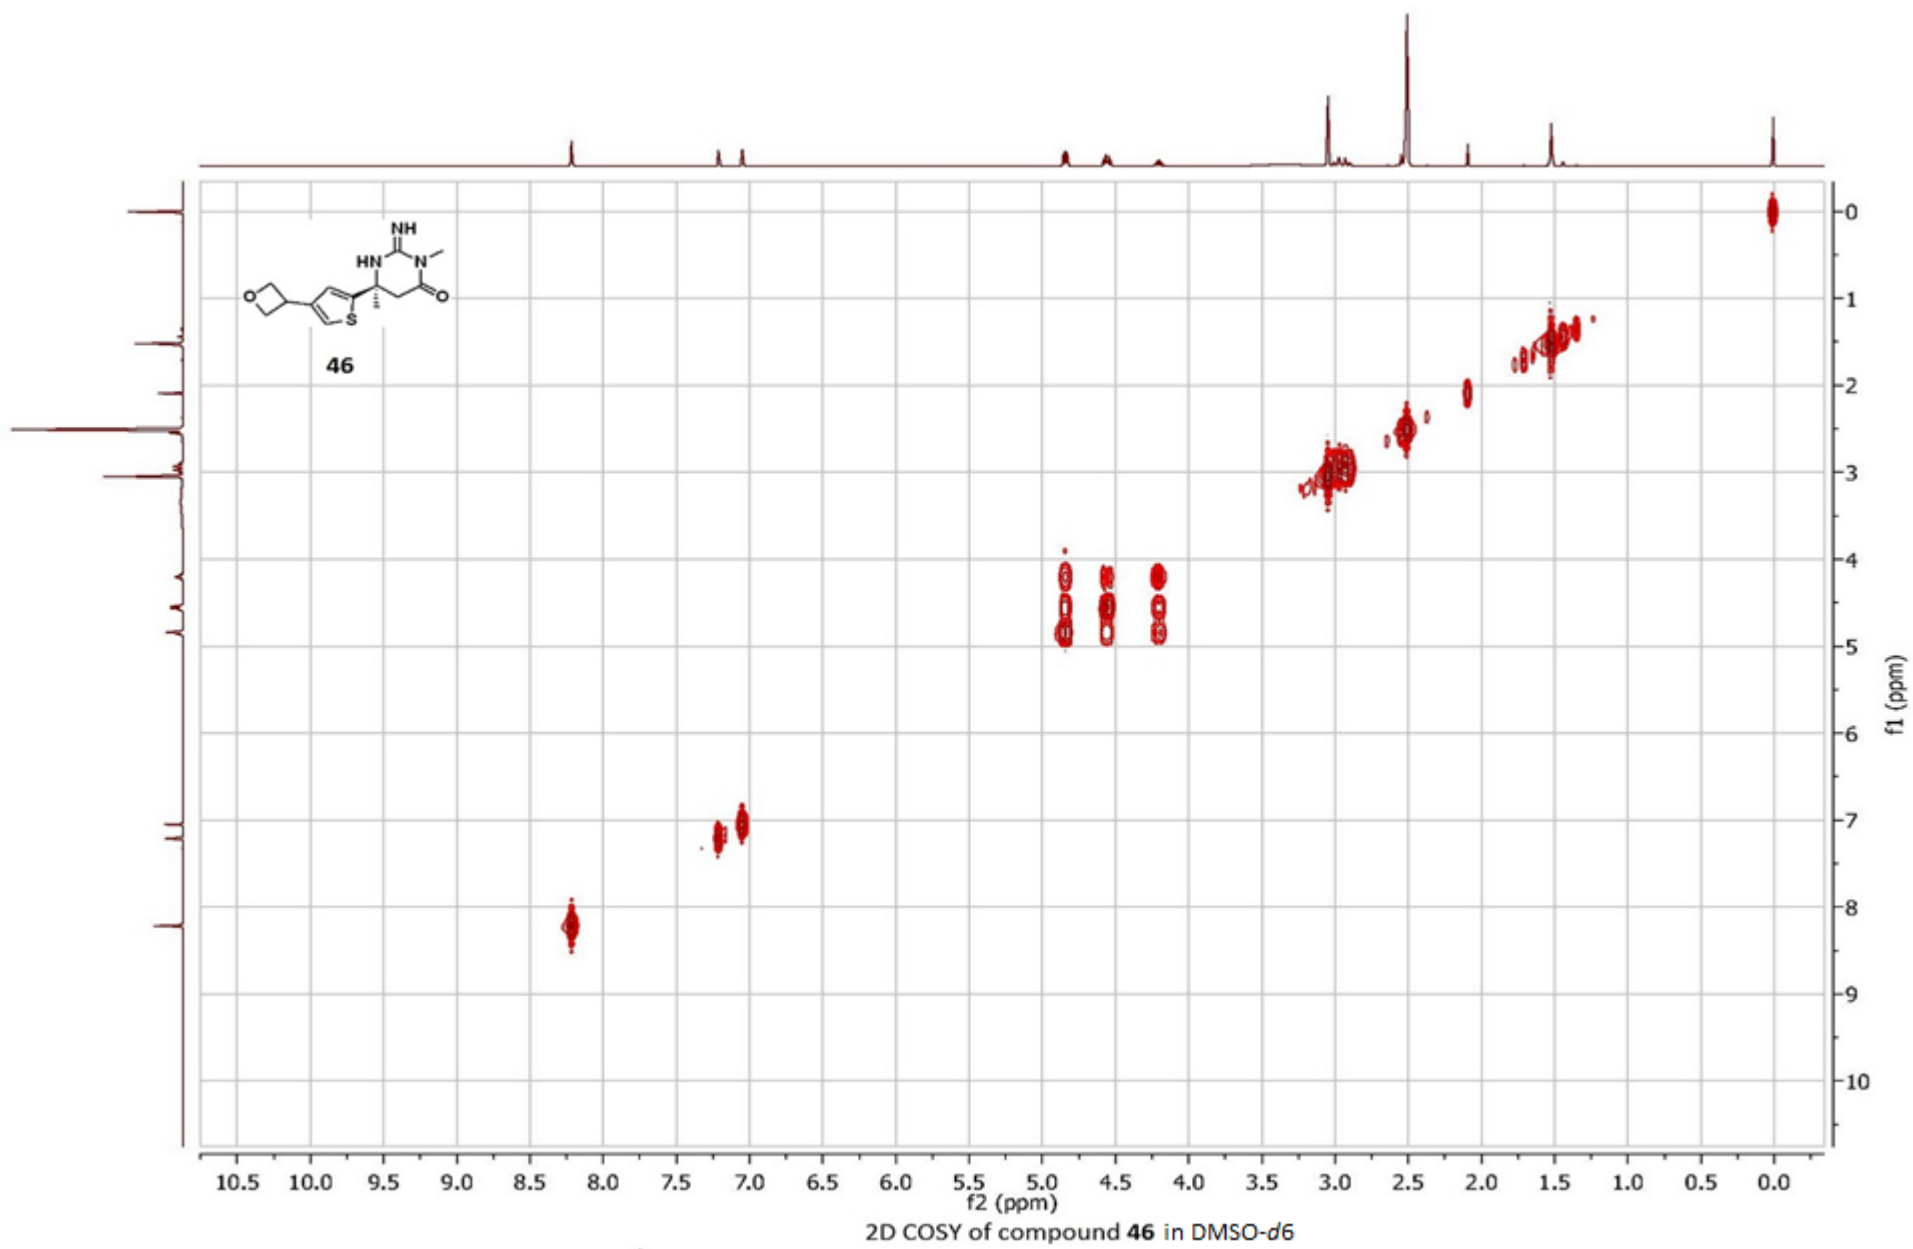

S148

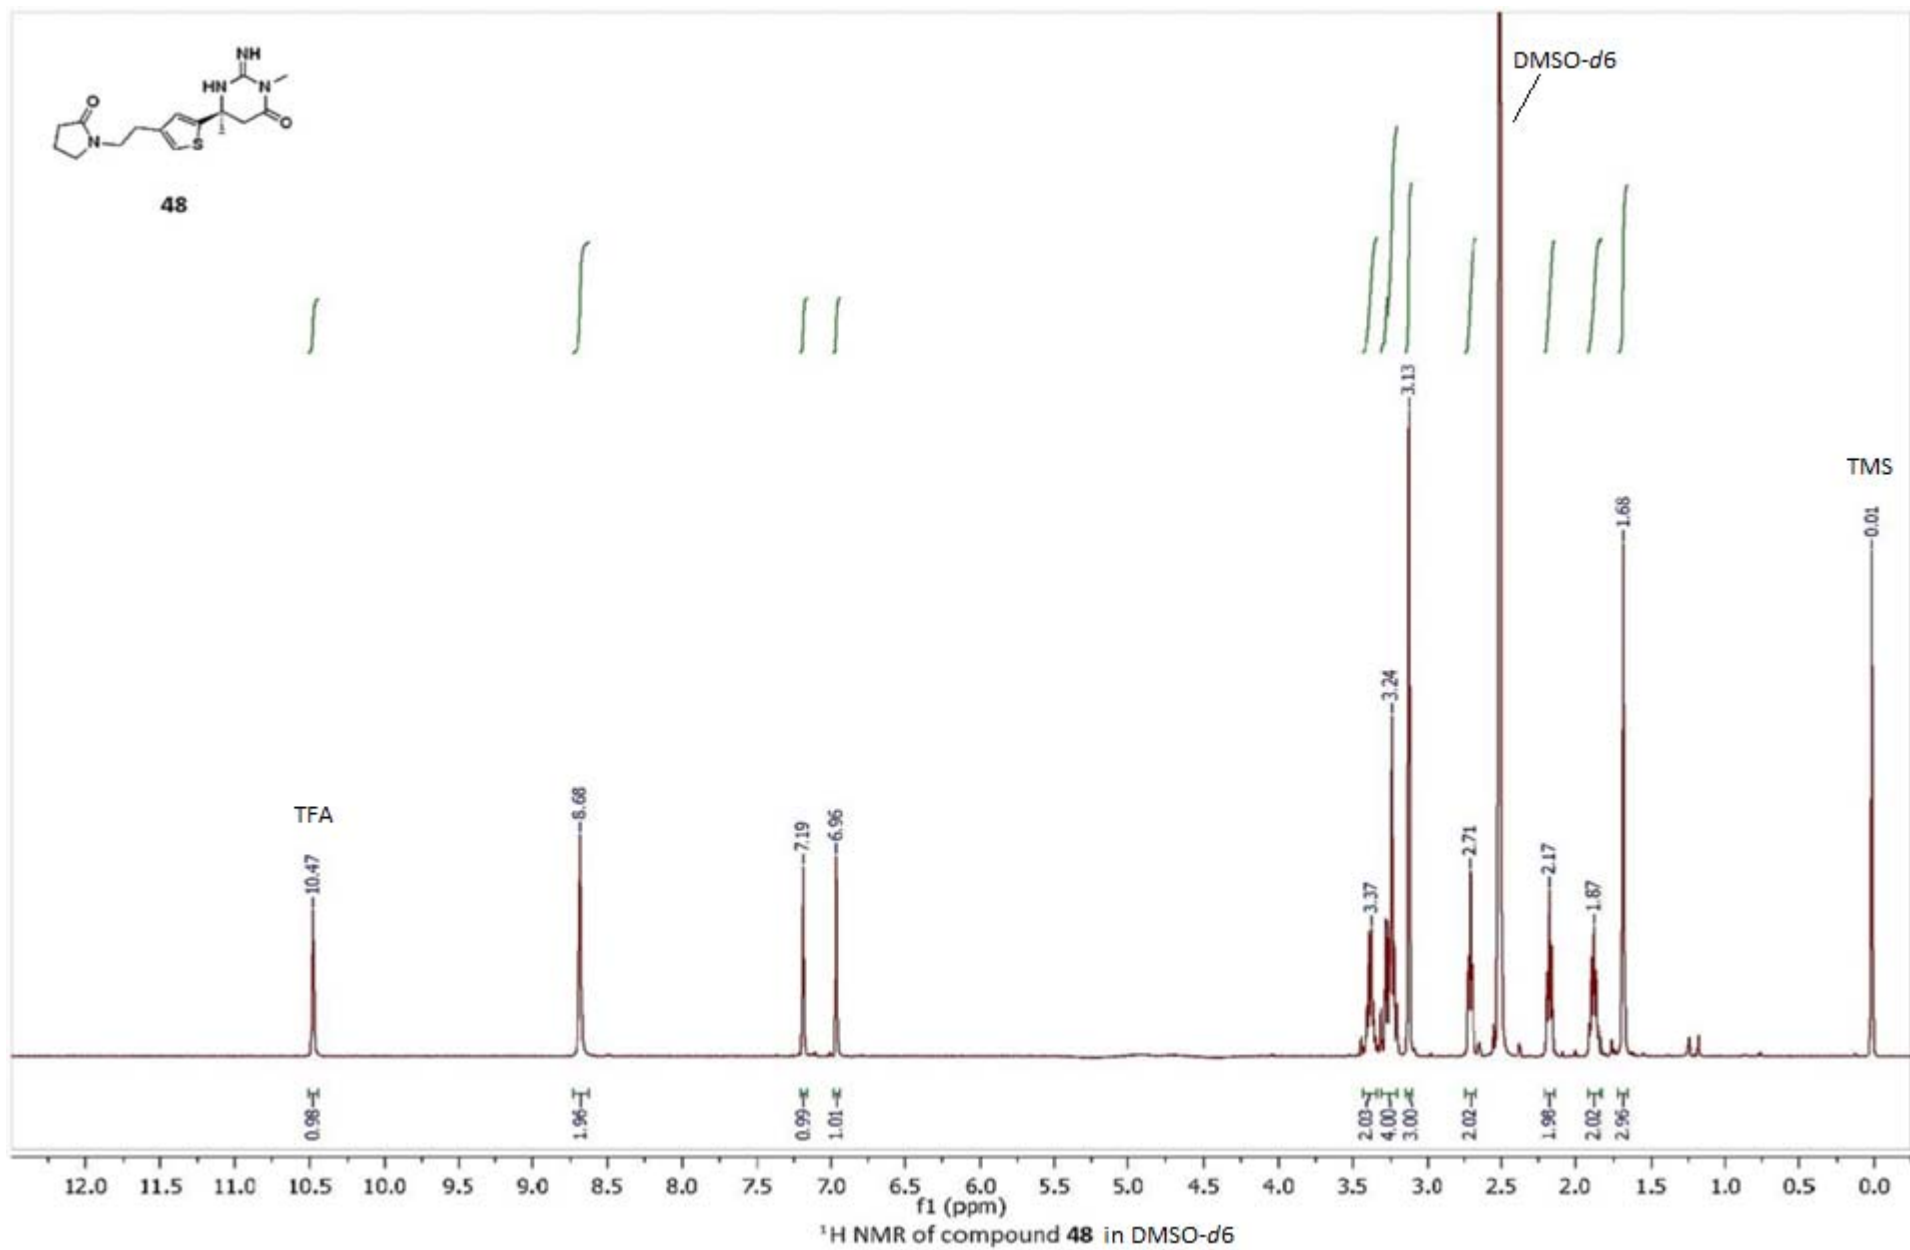

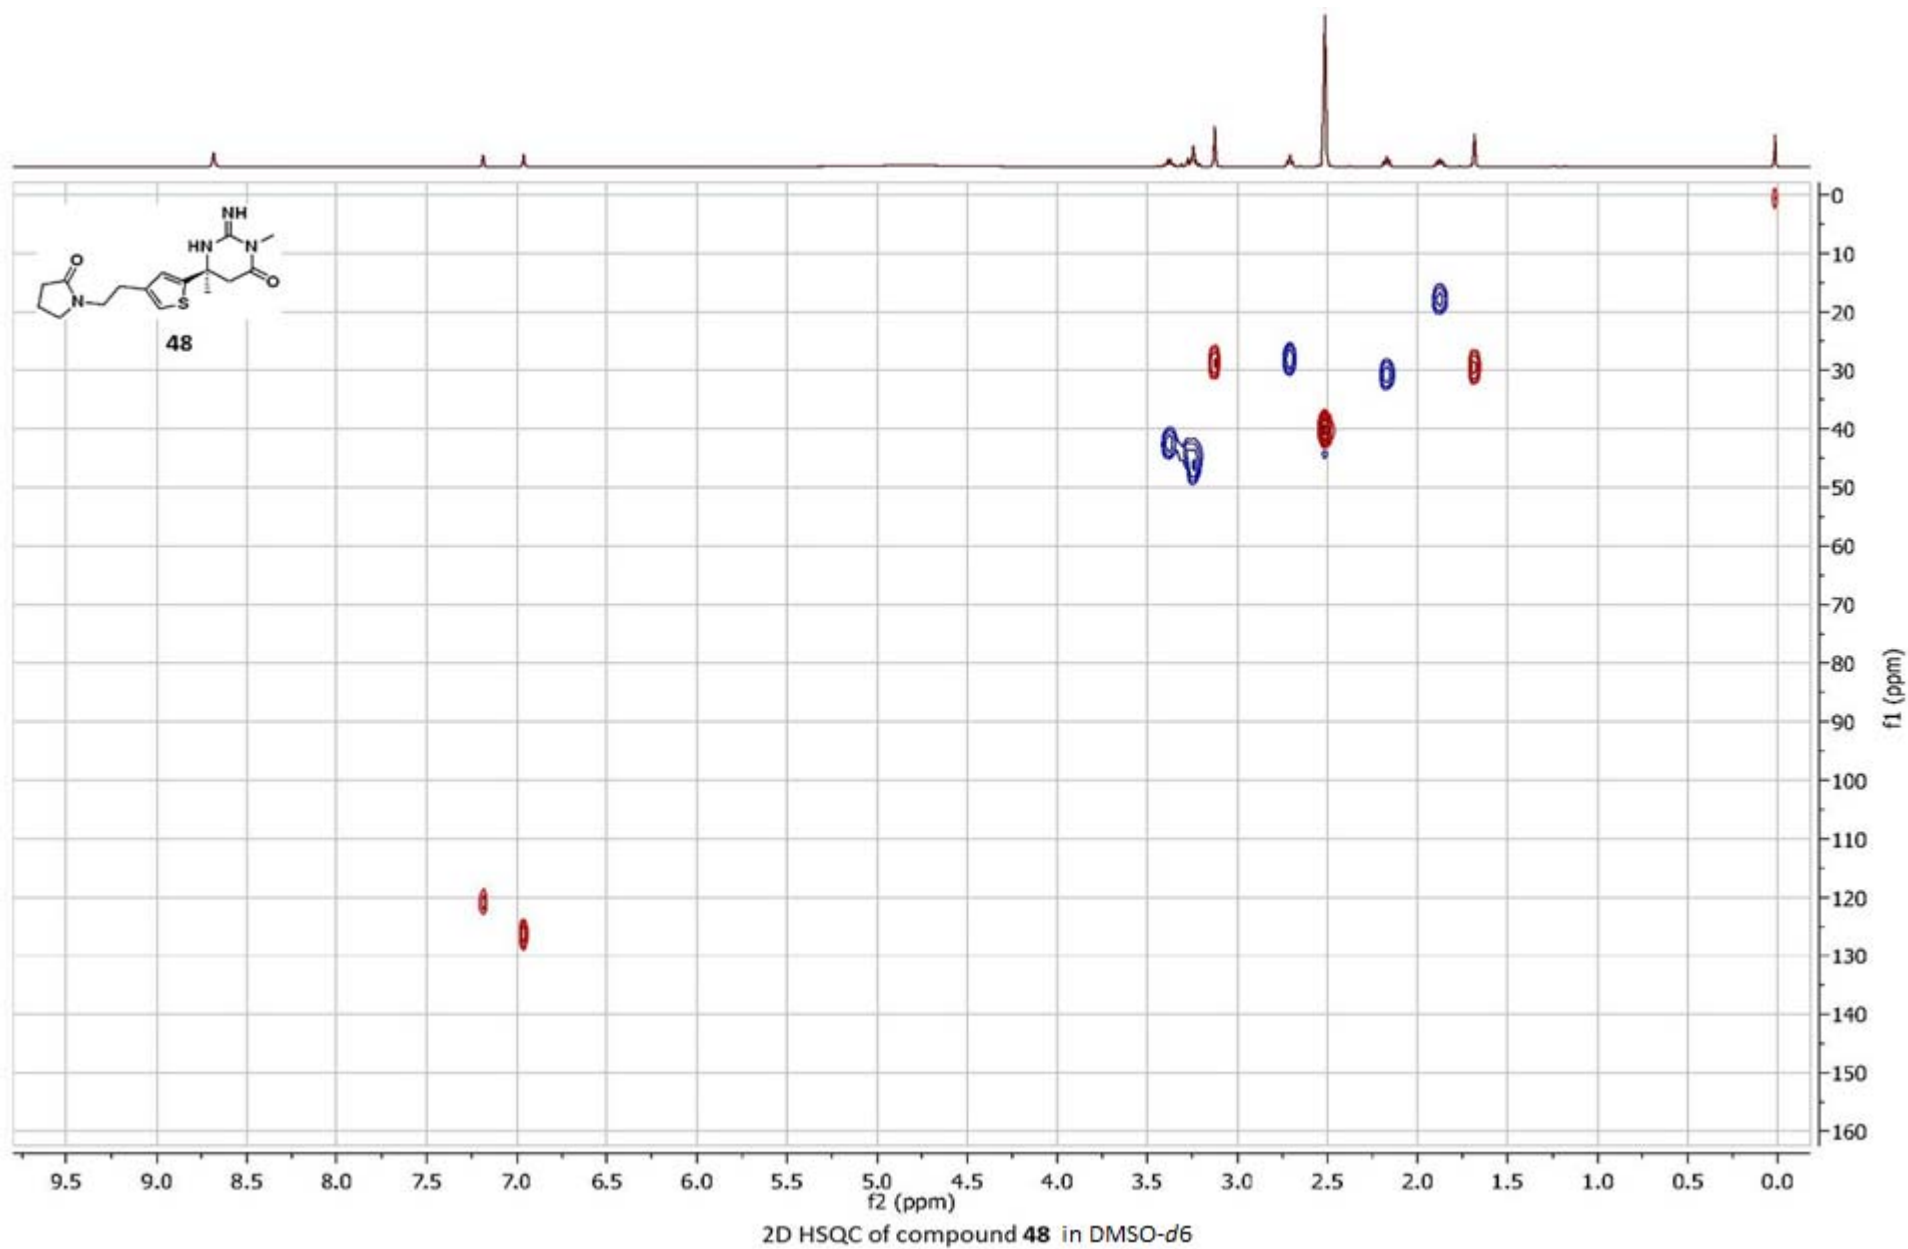

S150

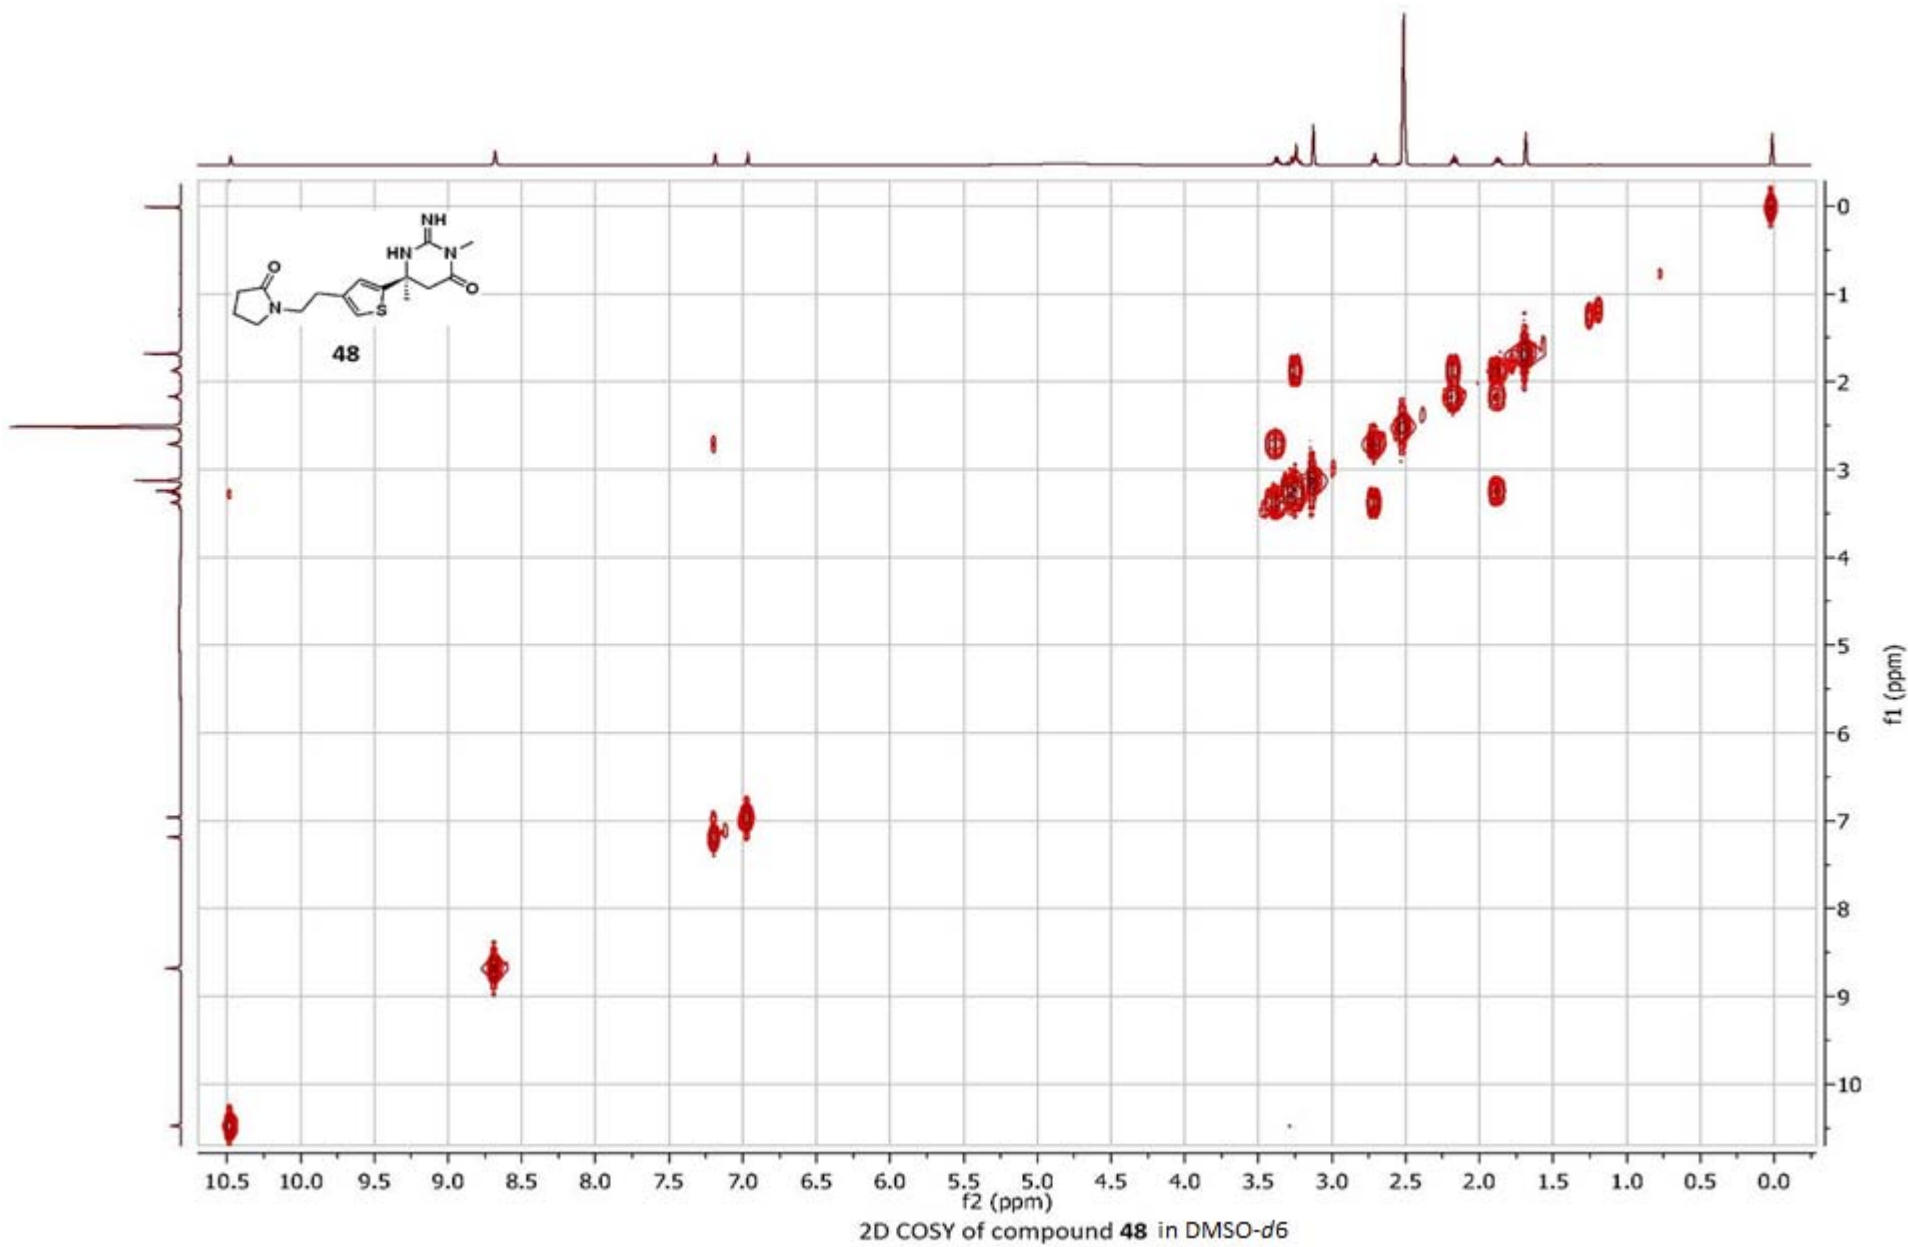

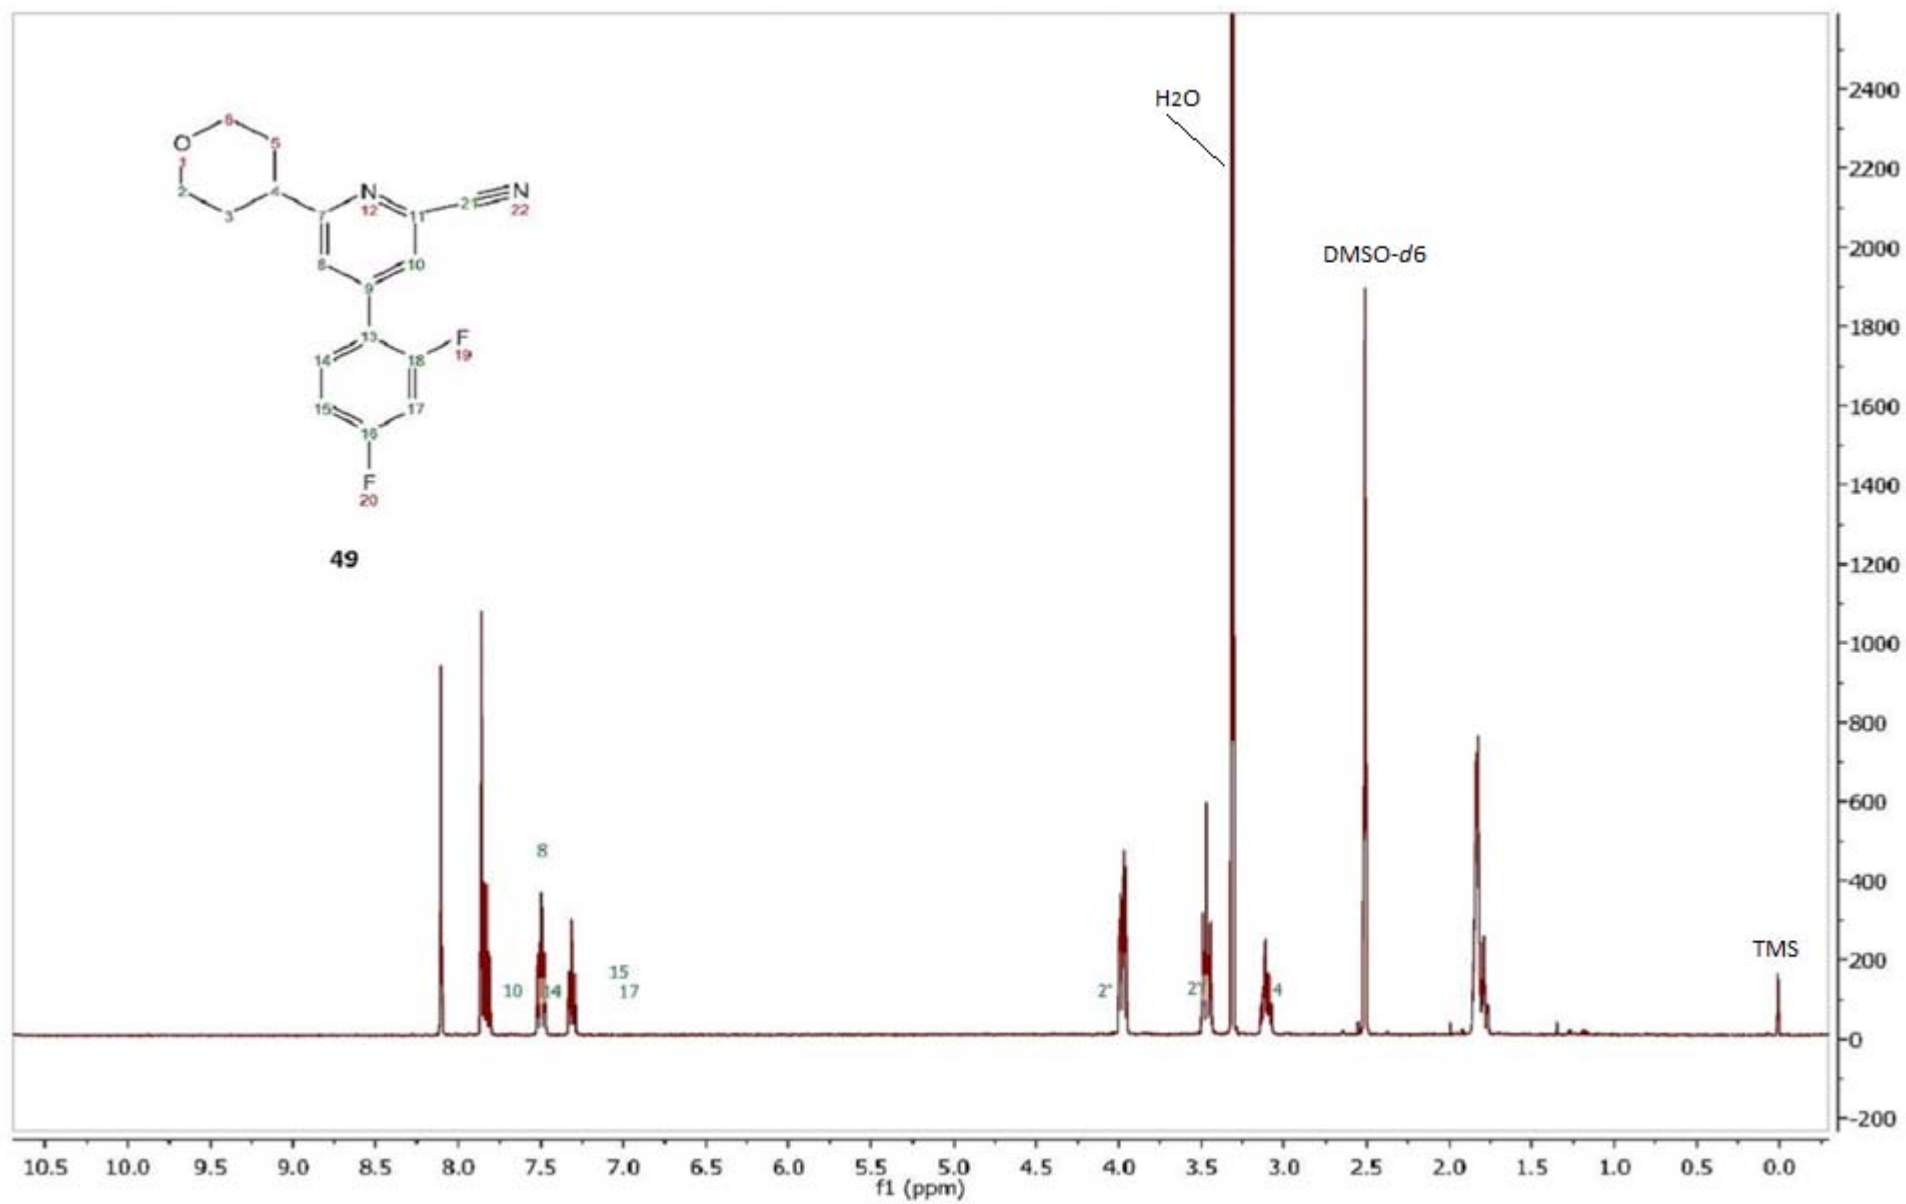

<sup>1</sup>H NMR of compound **49** in DMSO-*d*<sub>6</sub>



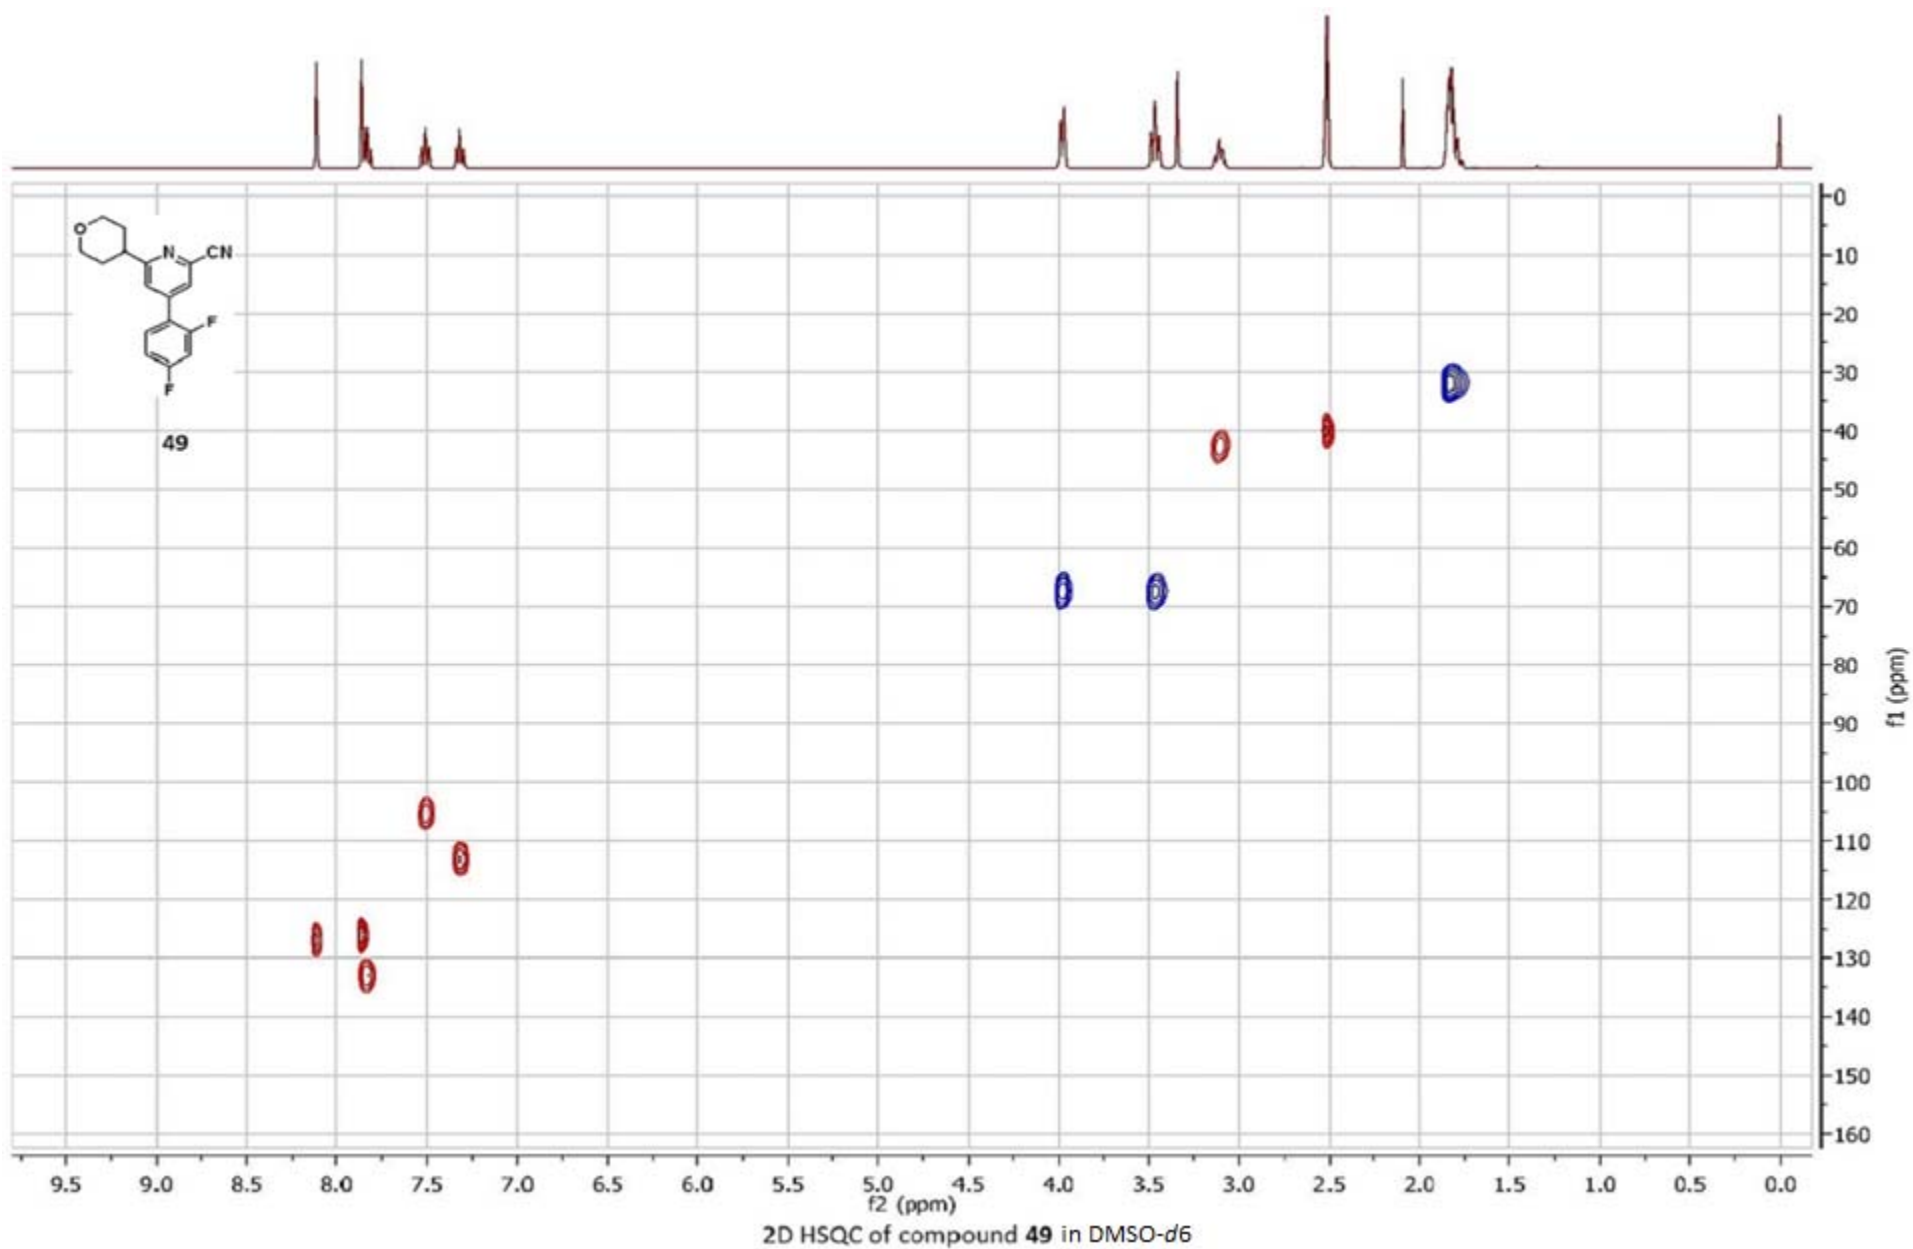

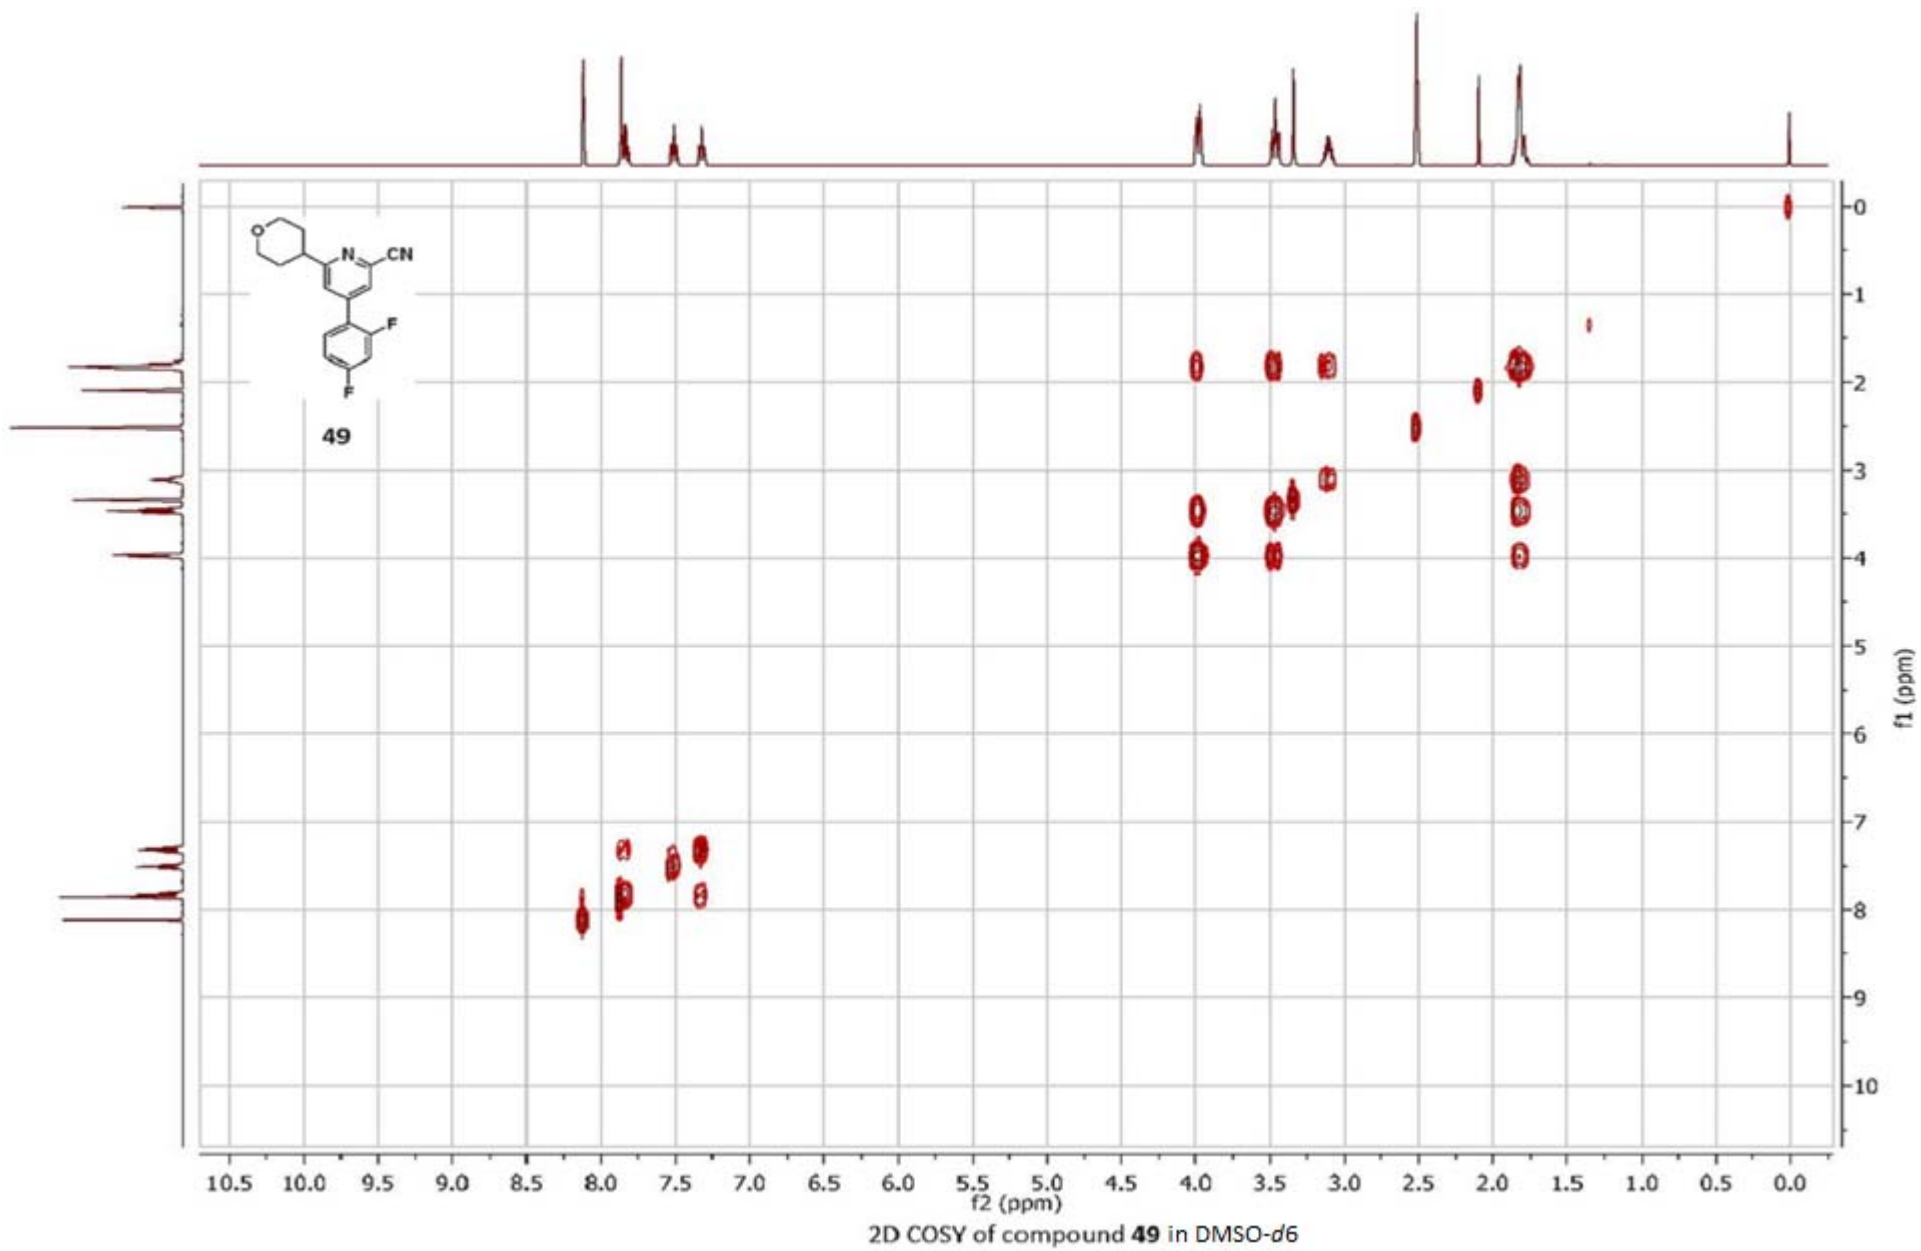

S154

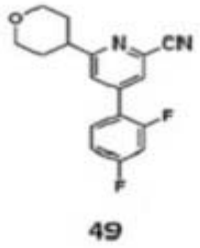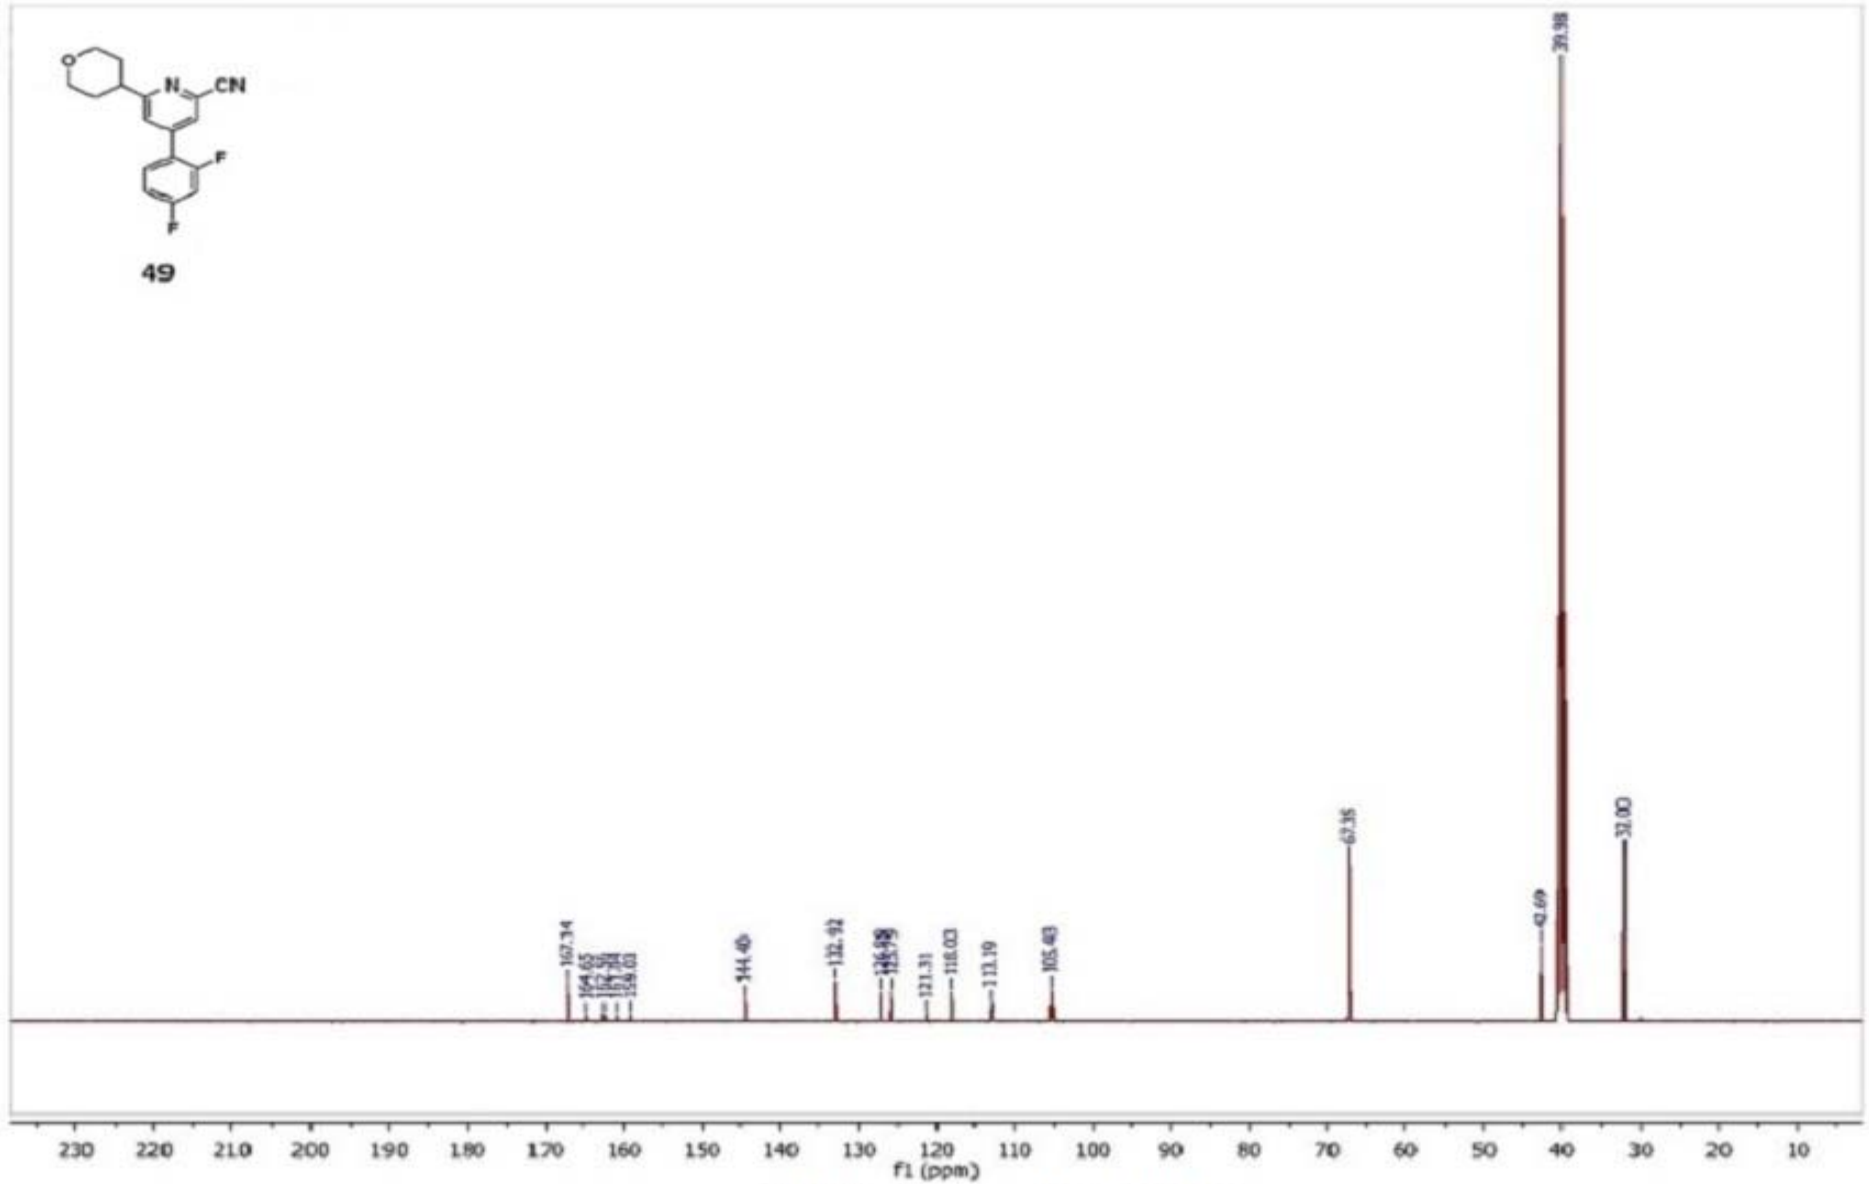

<sup>13</sup>C NMR of compound 49 in DMSO-*d*<sub>6</sub>

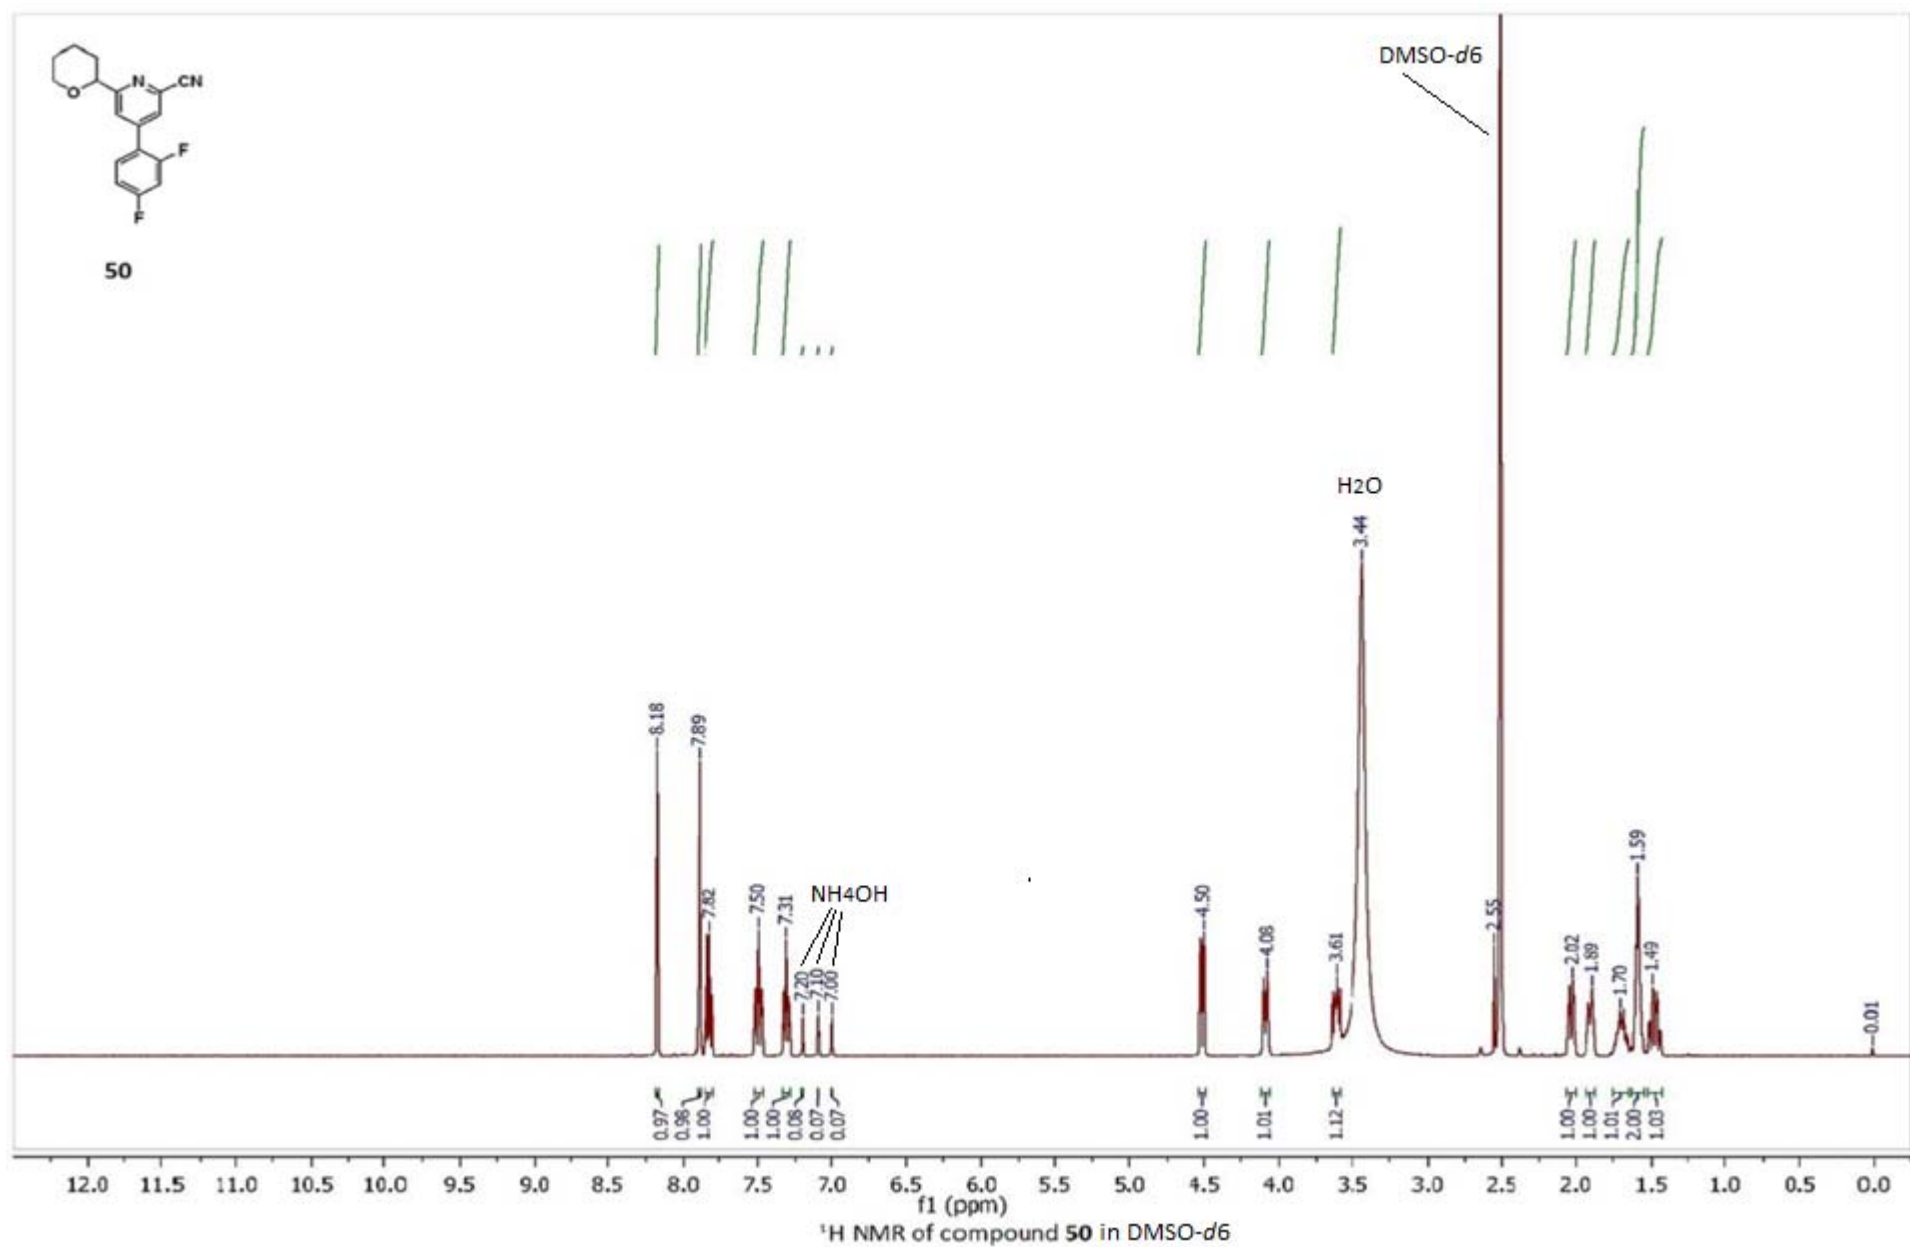

S156

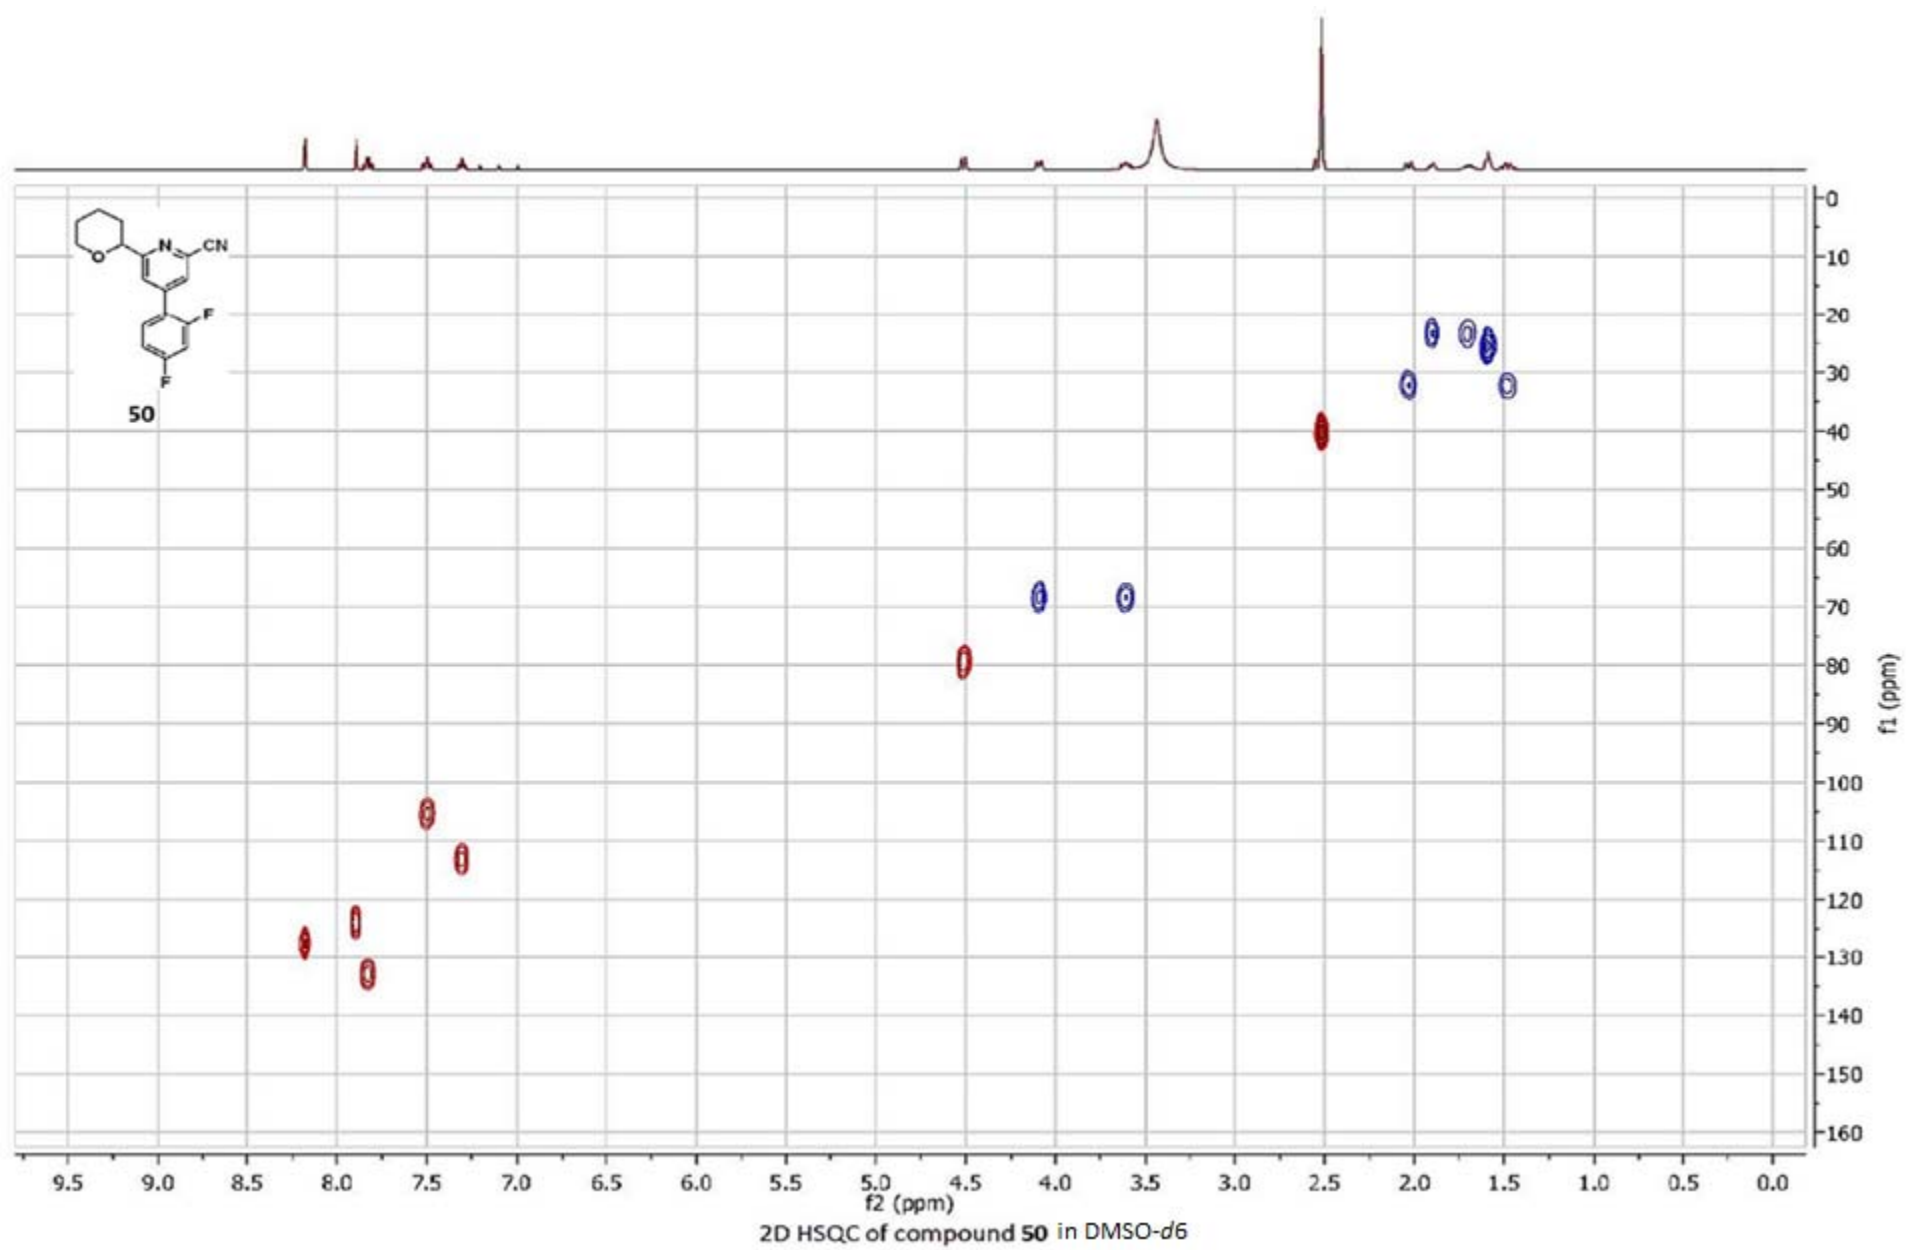

S157

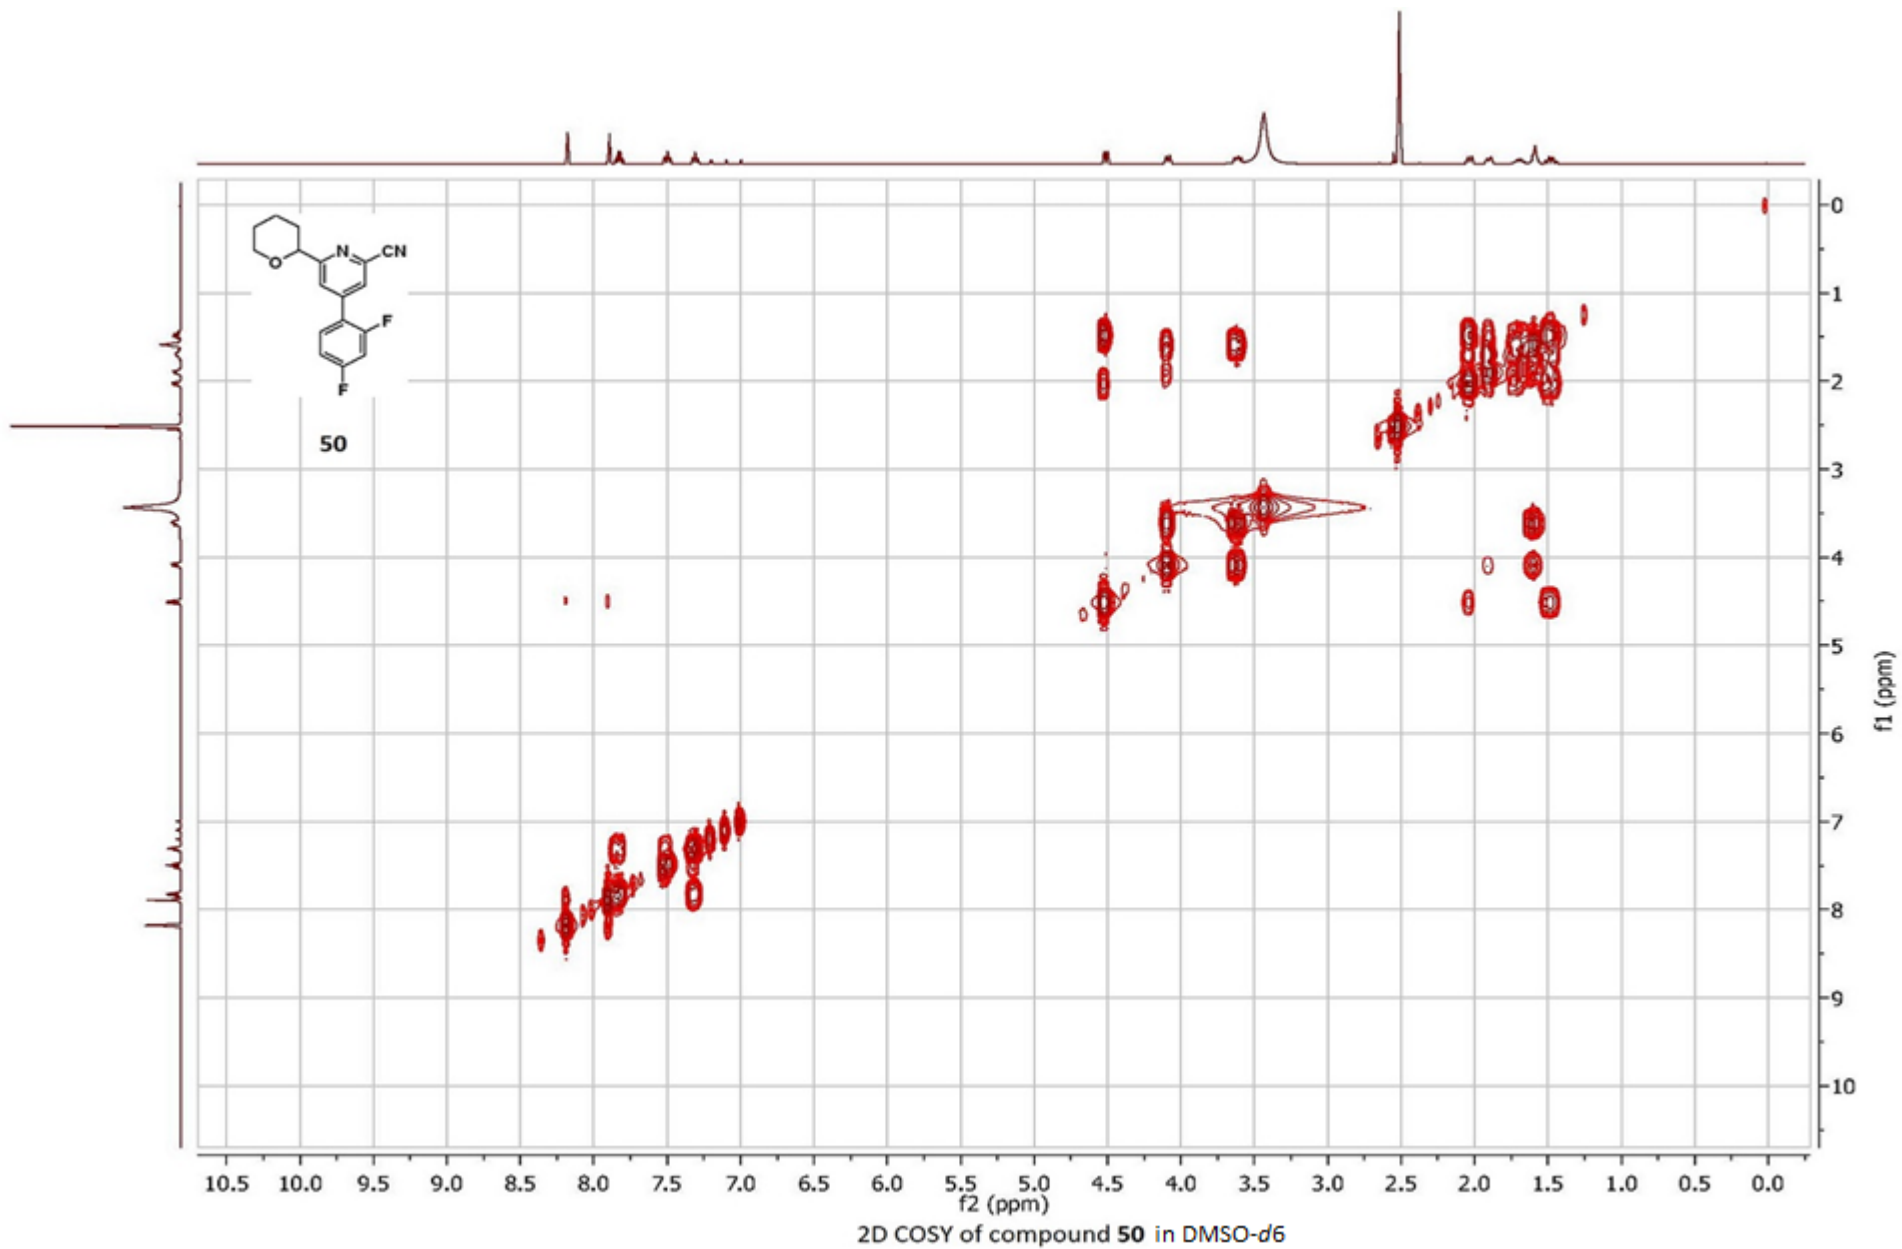

S158

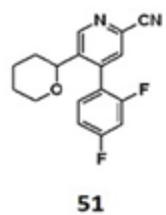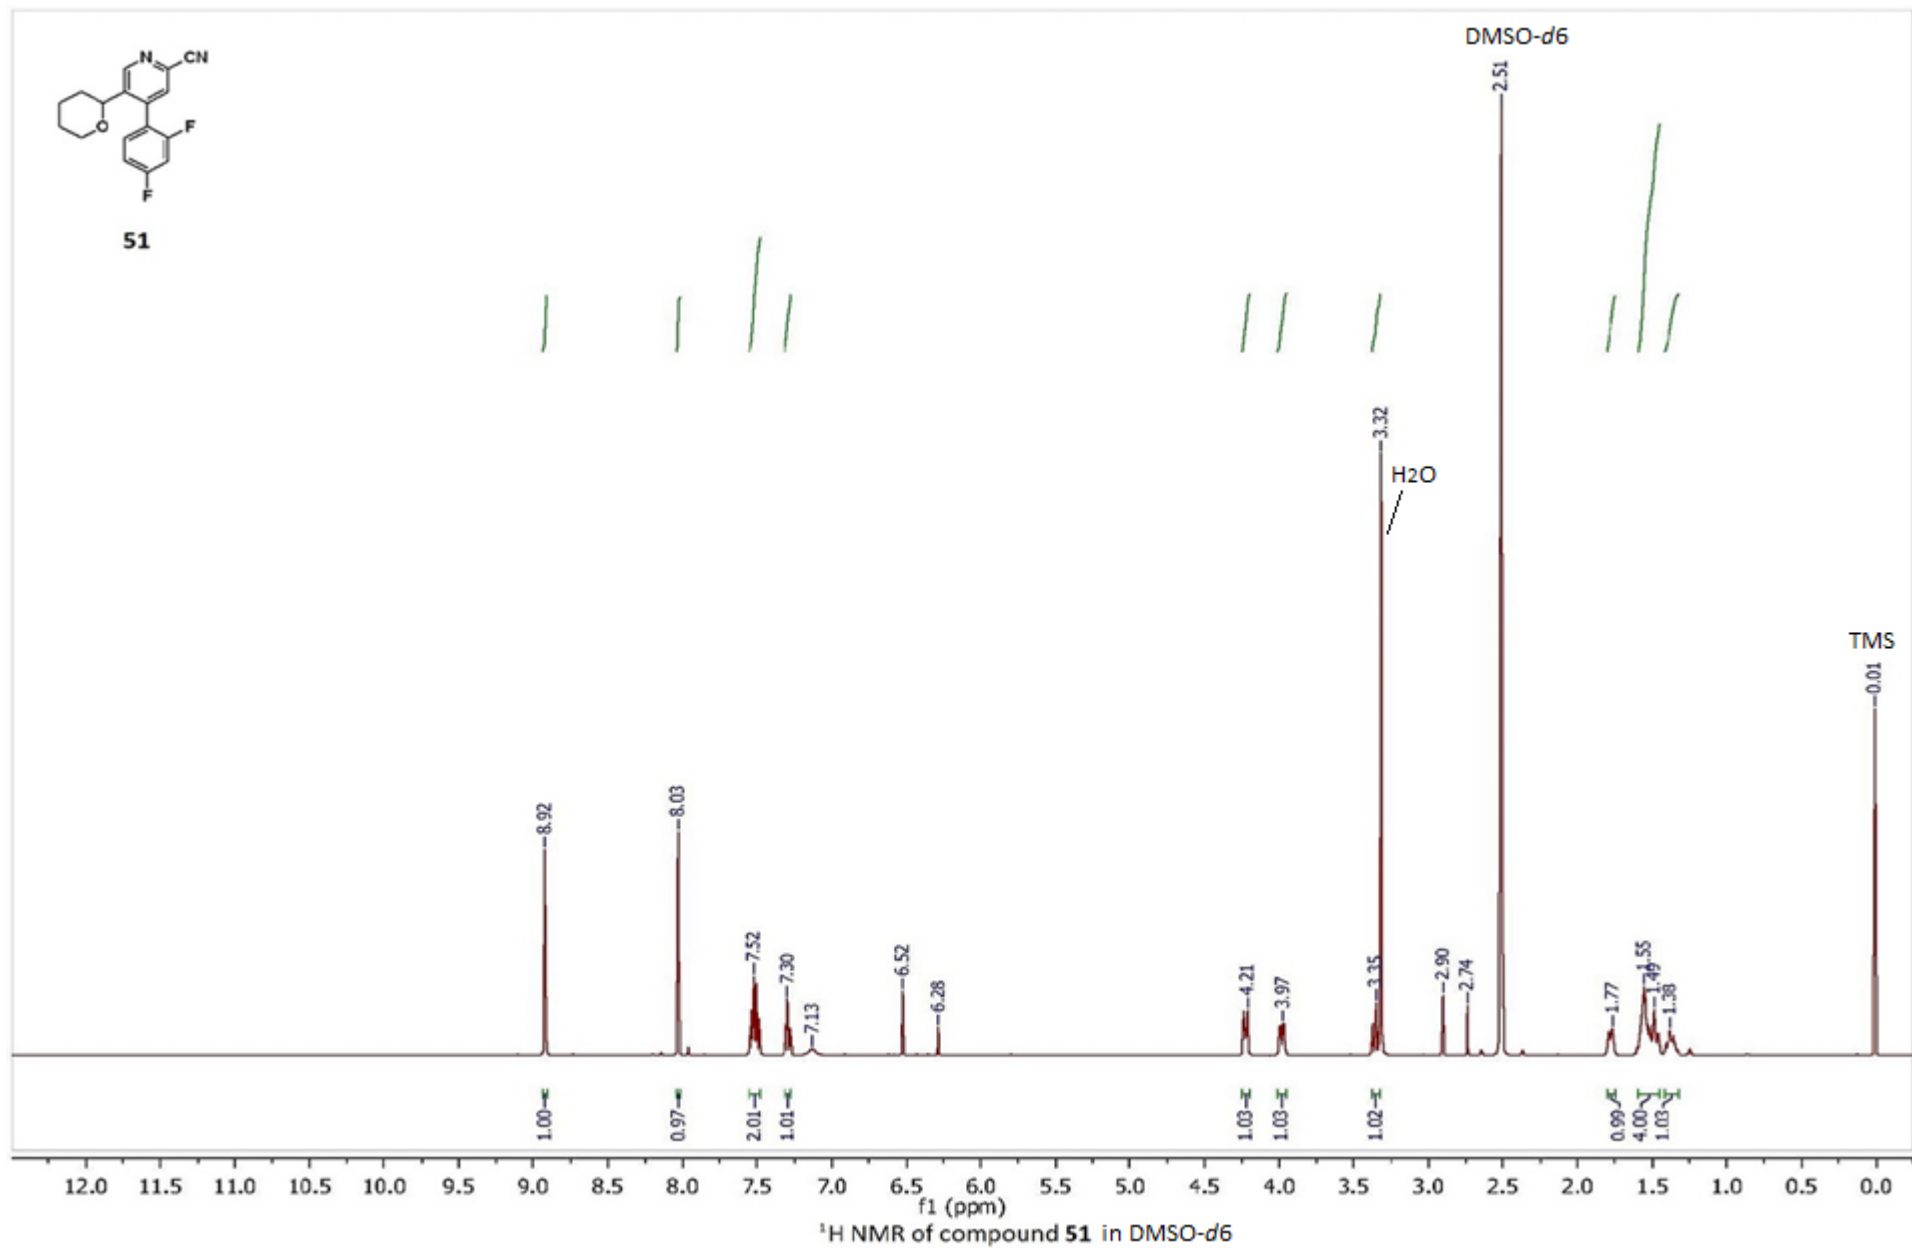

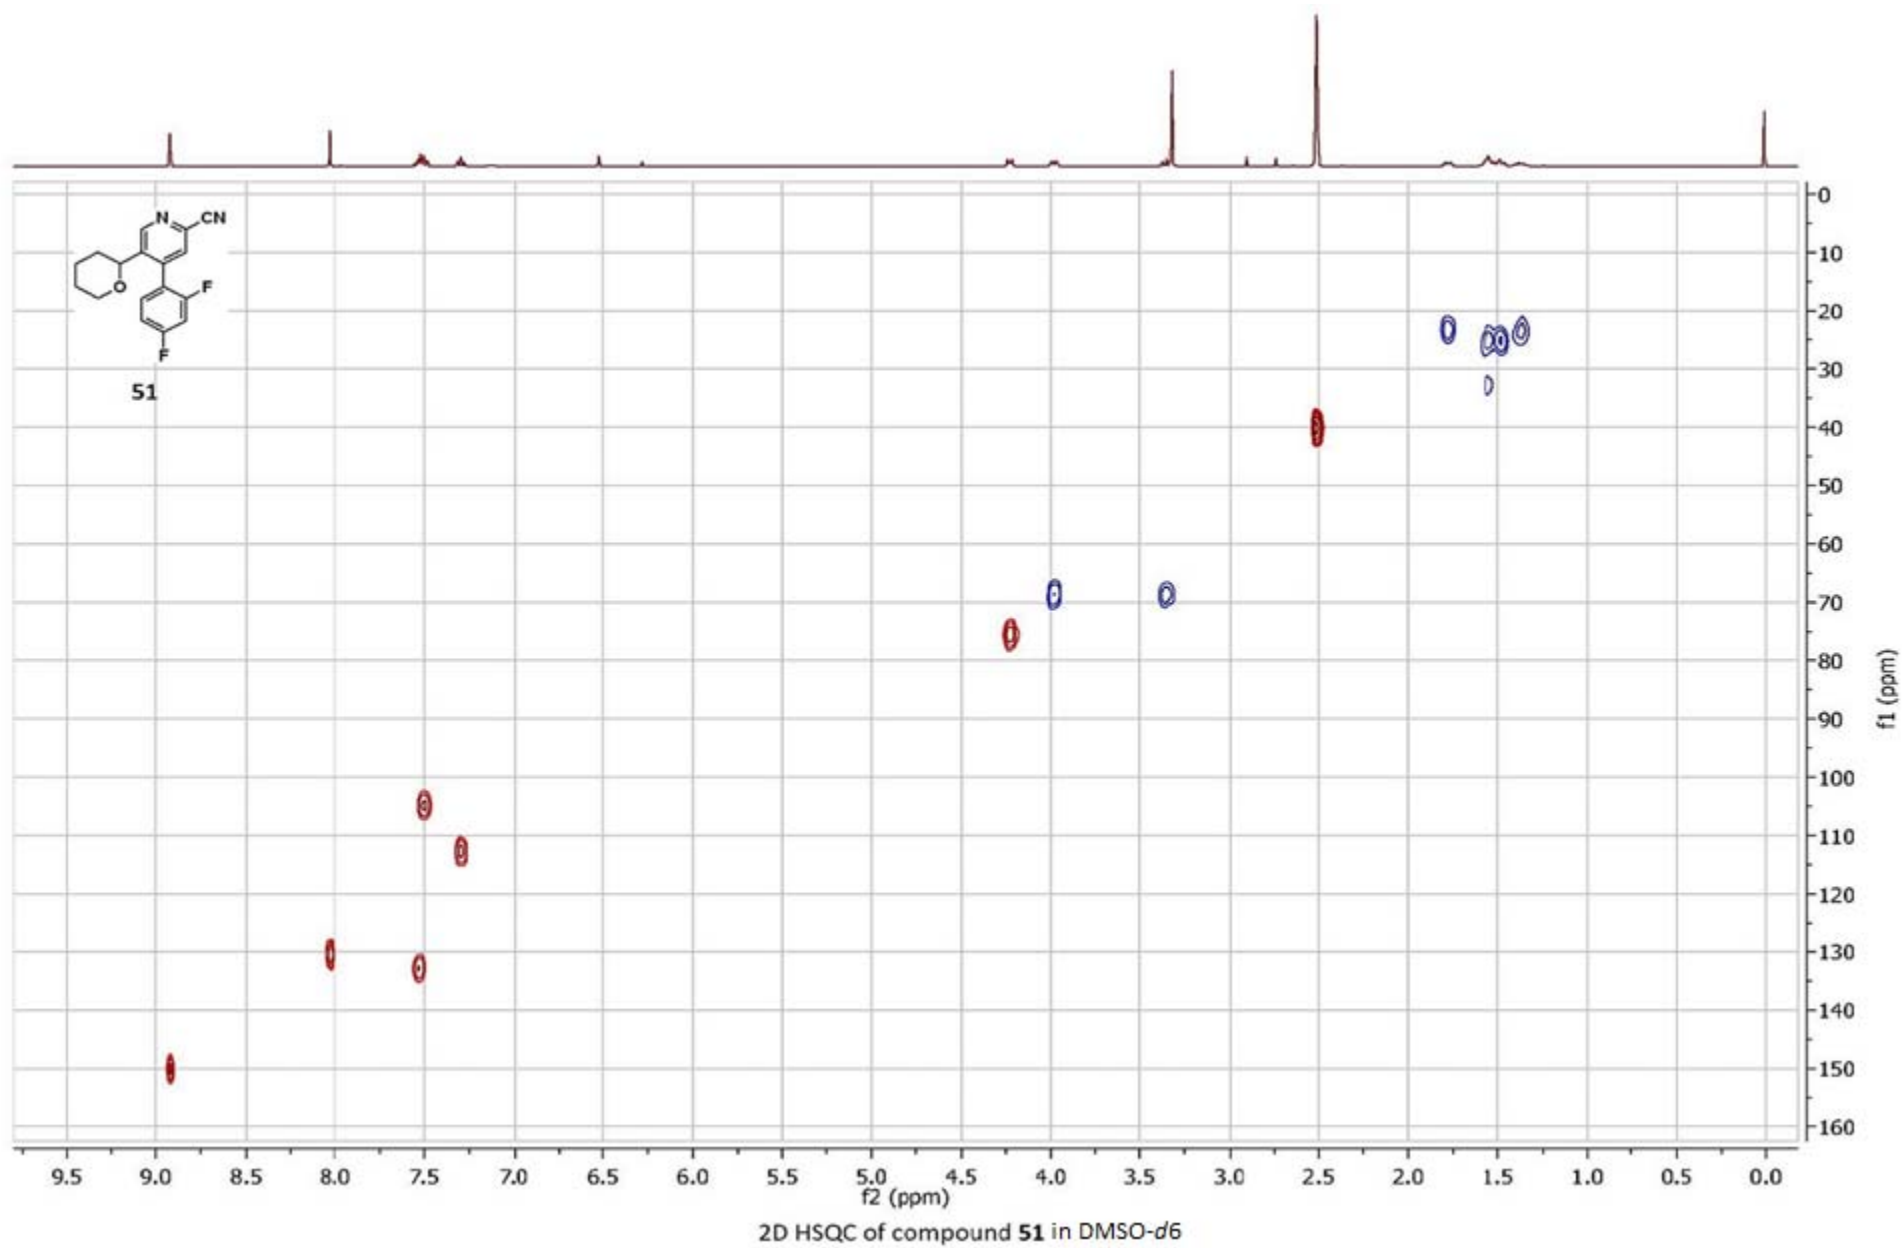

S160



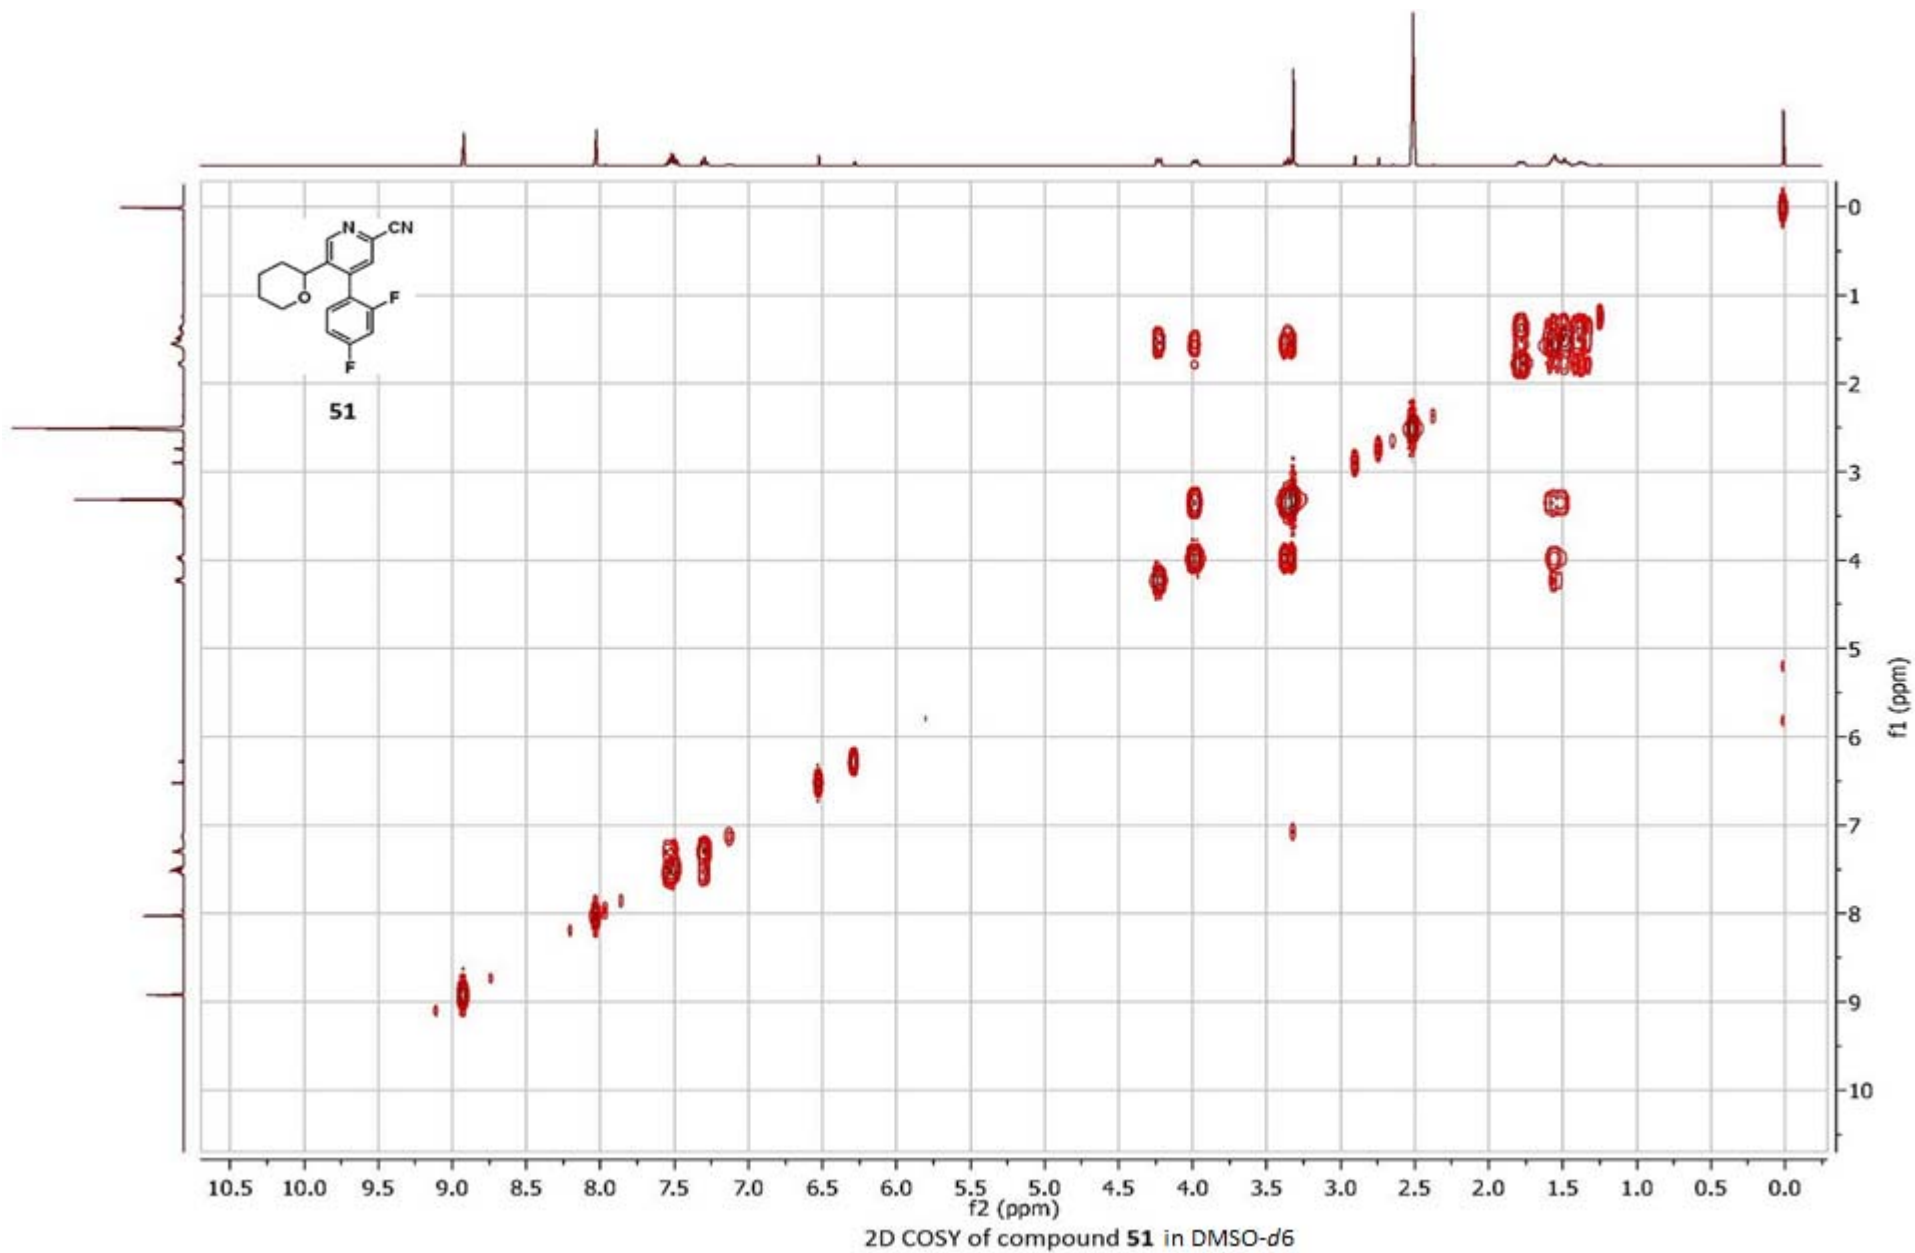

S161

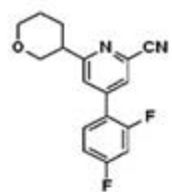

52

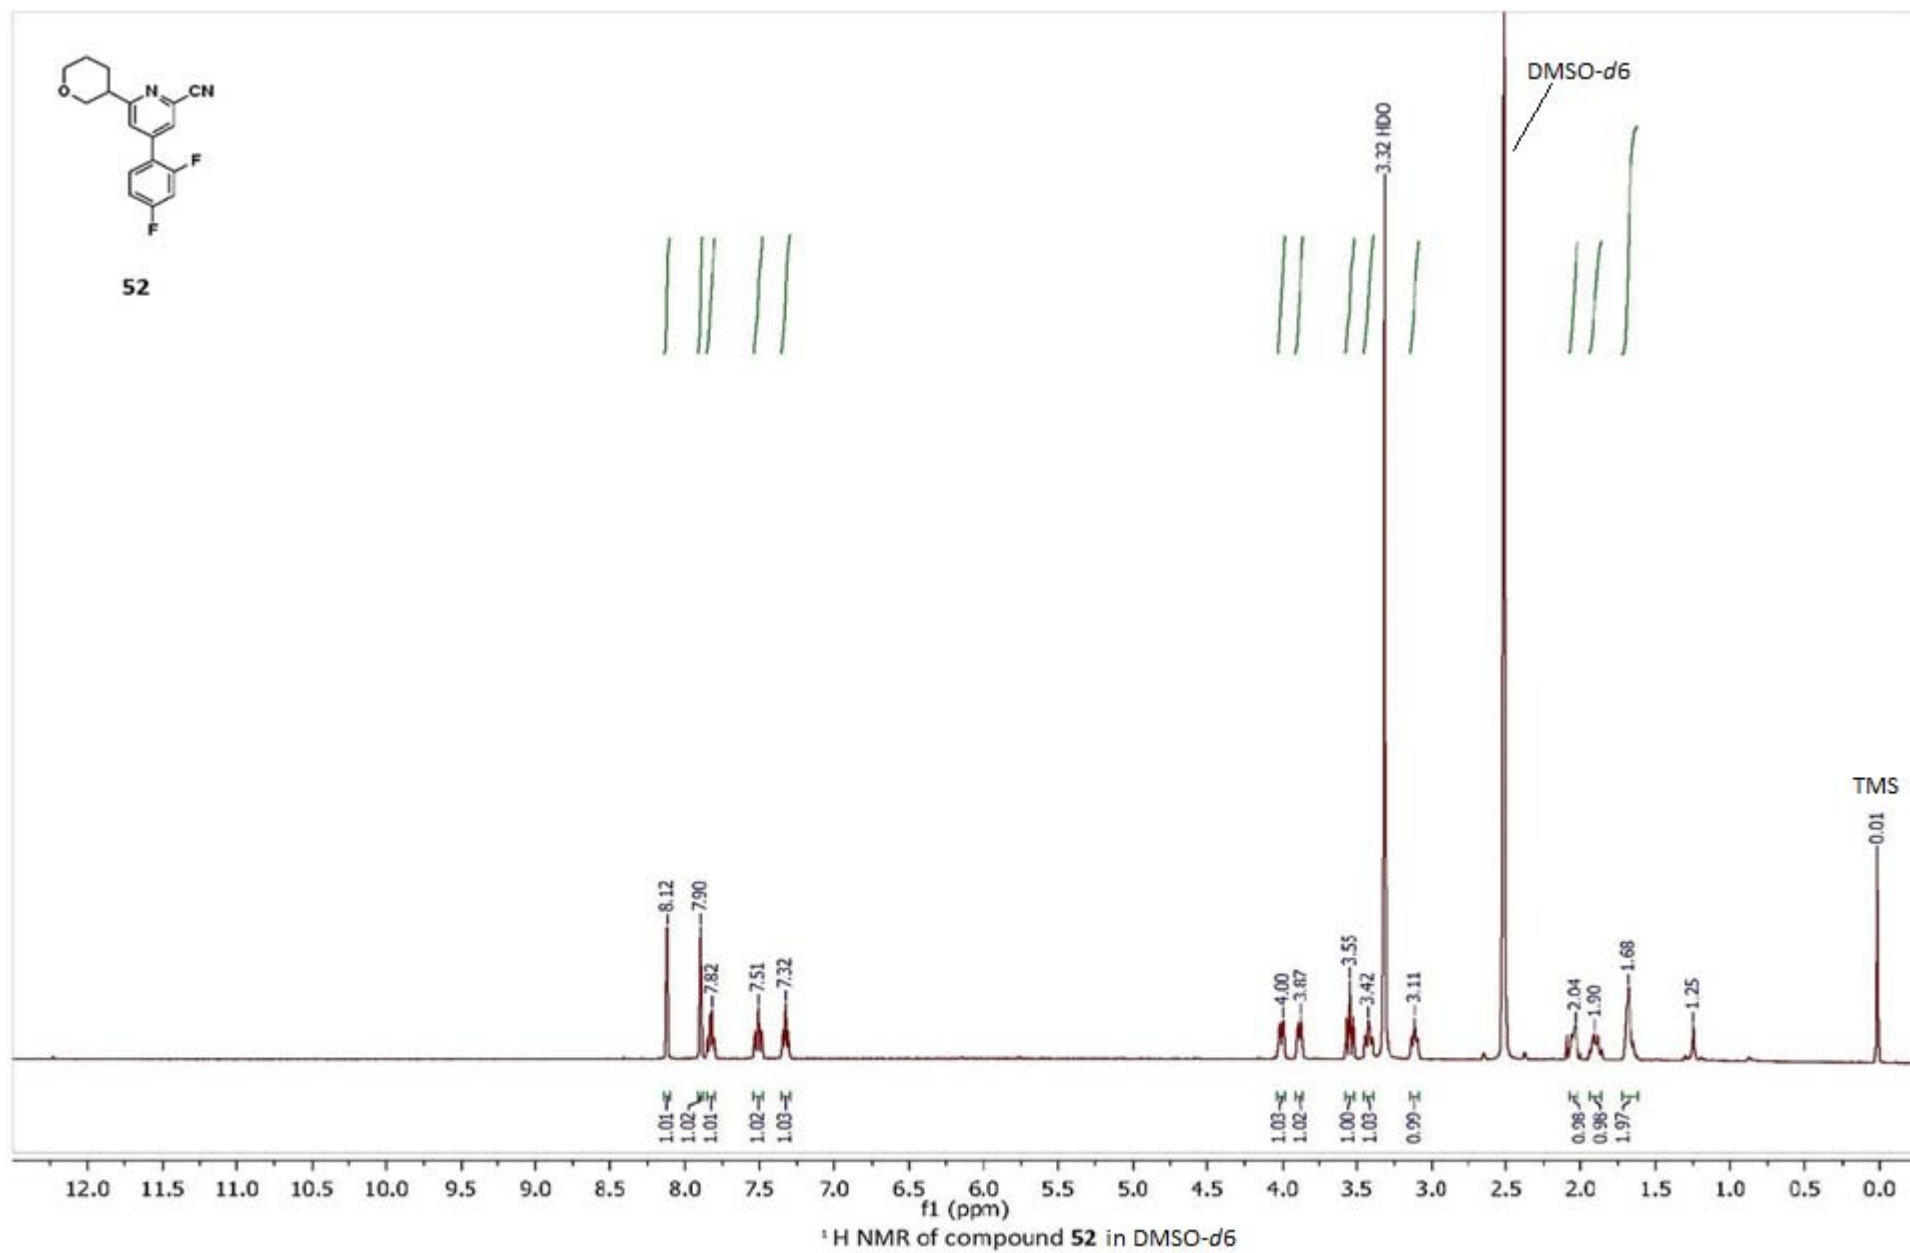

S162

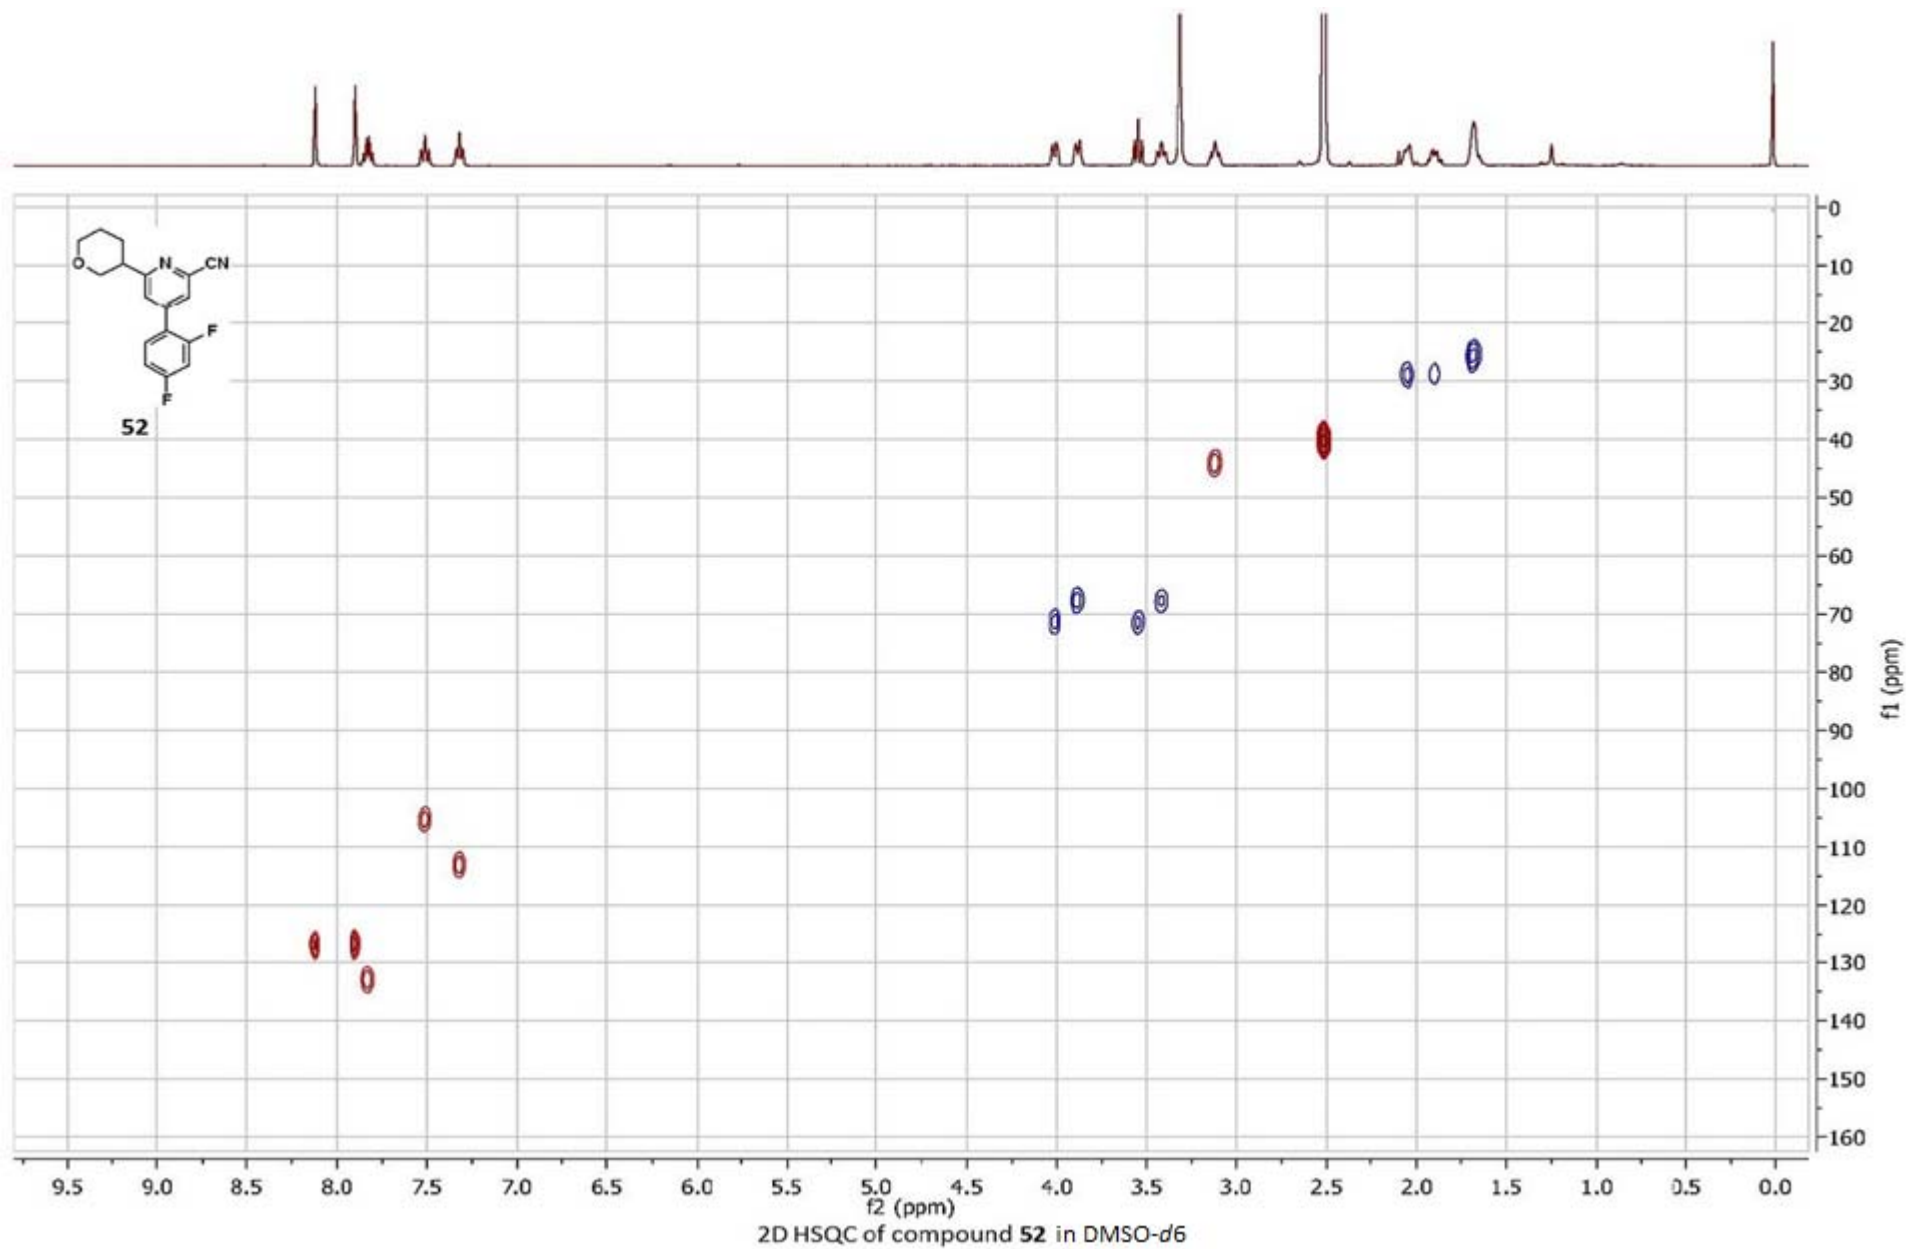

S163

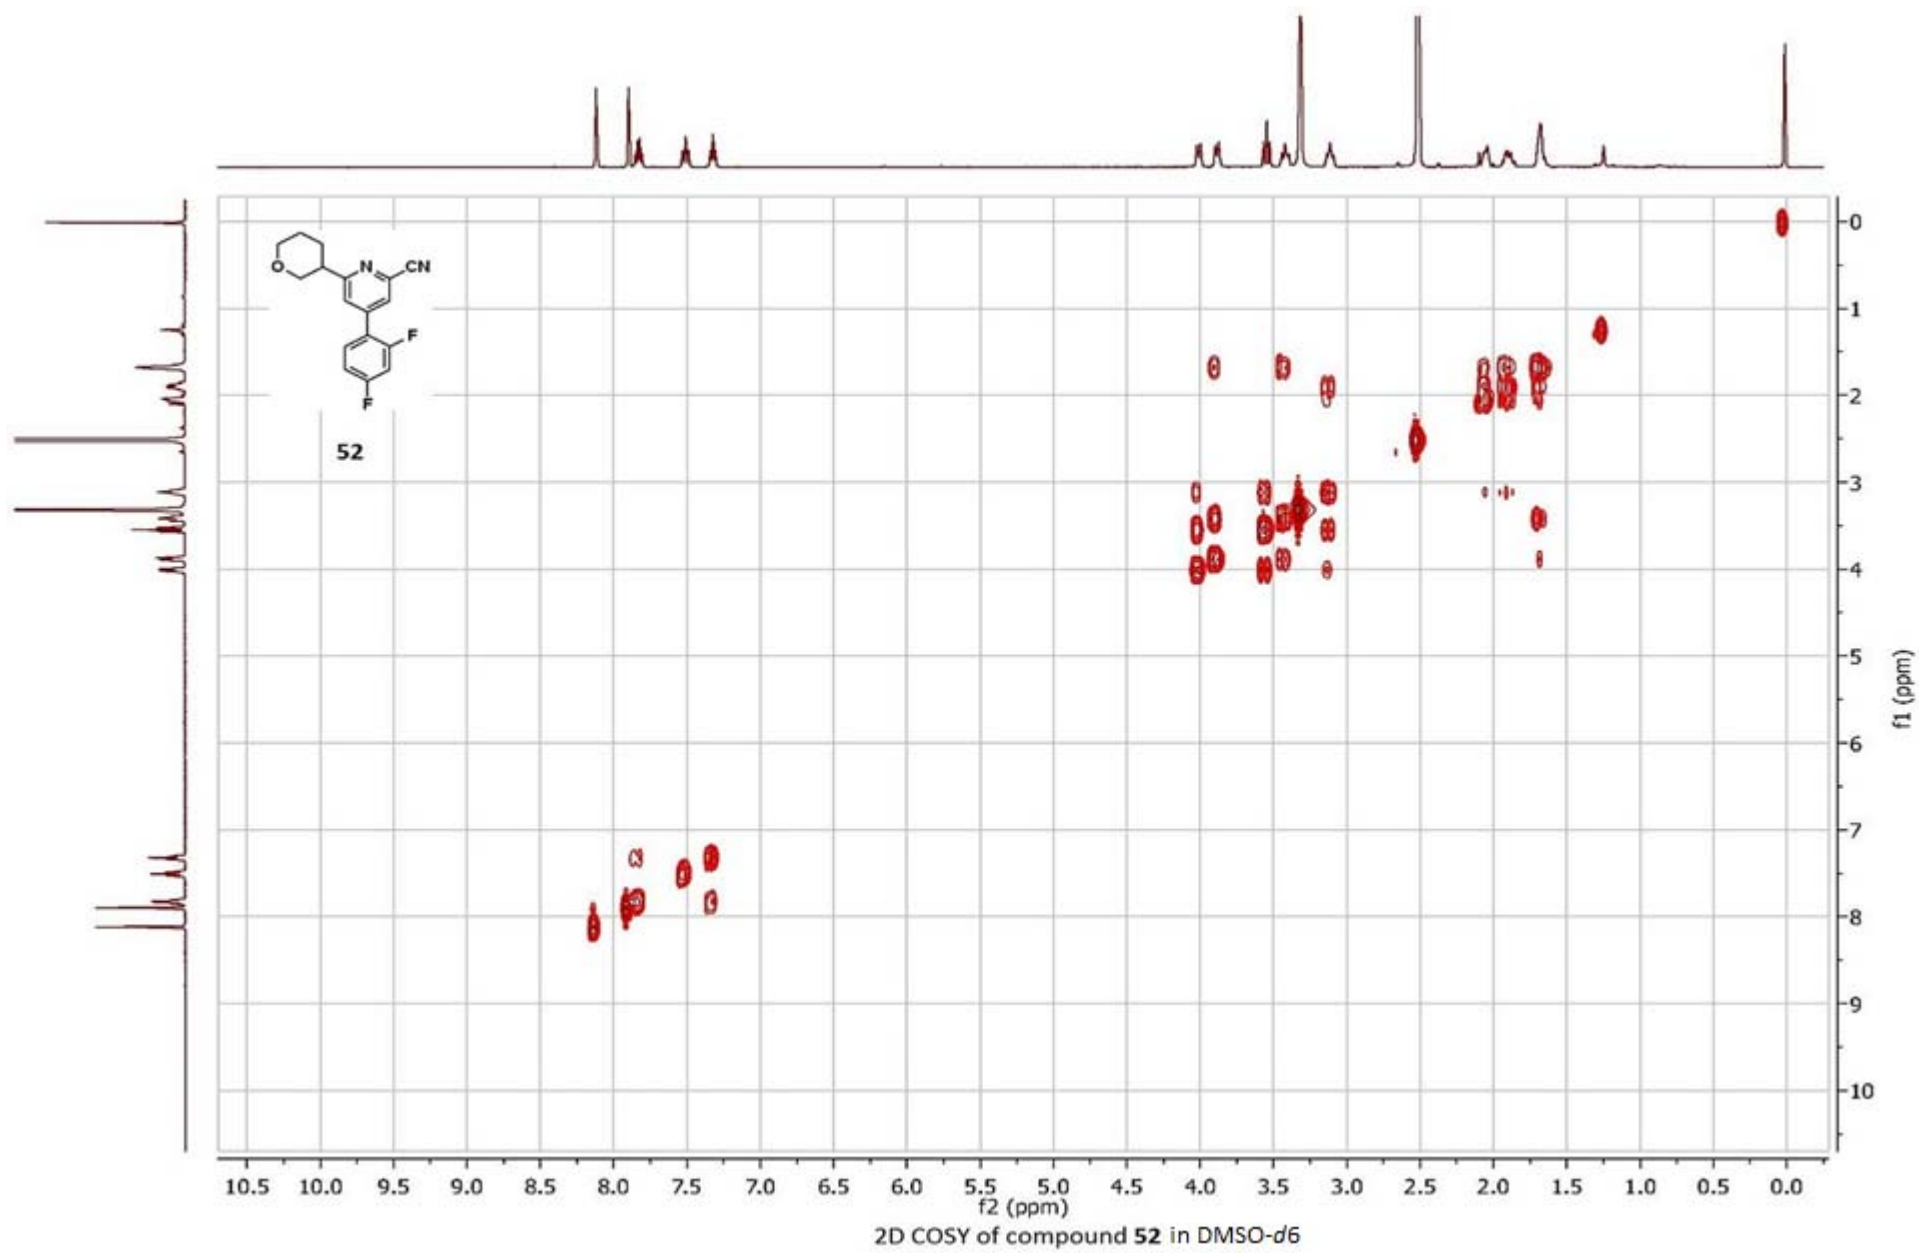

S164

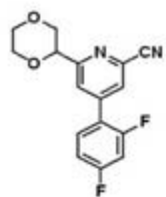

53

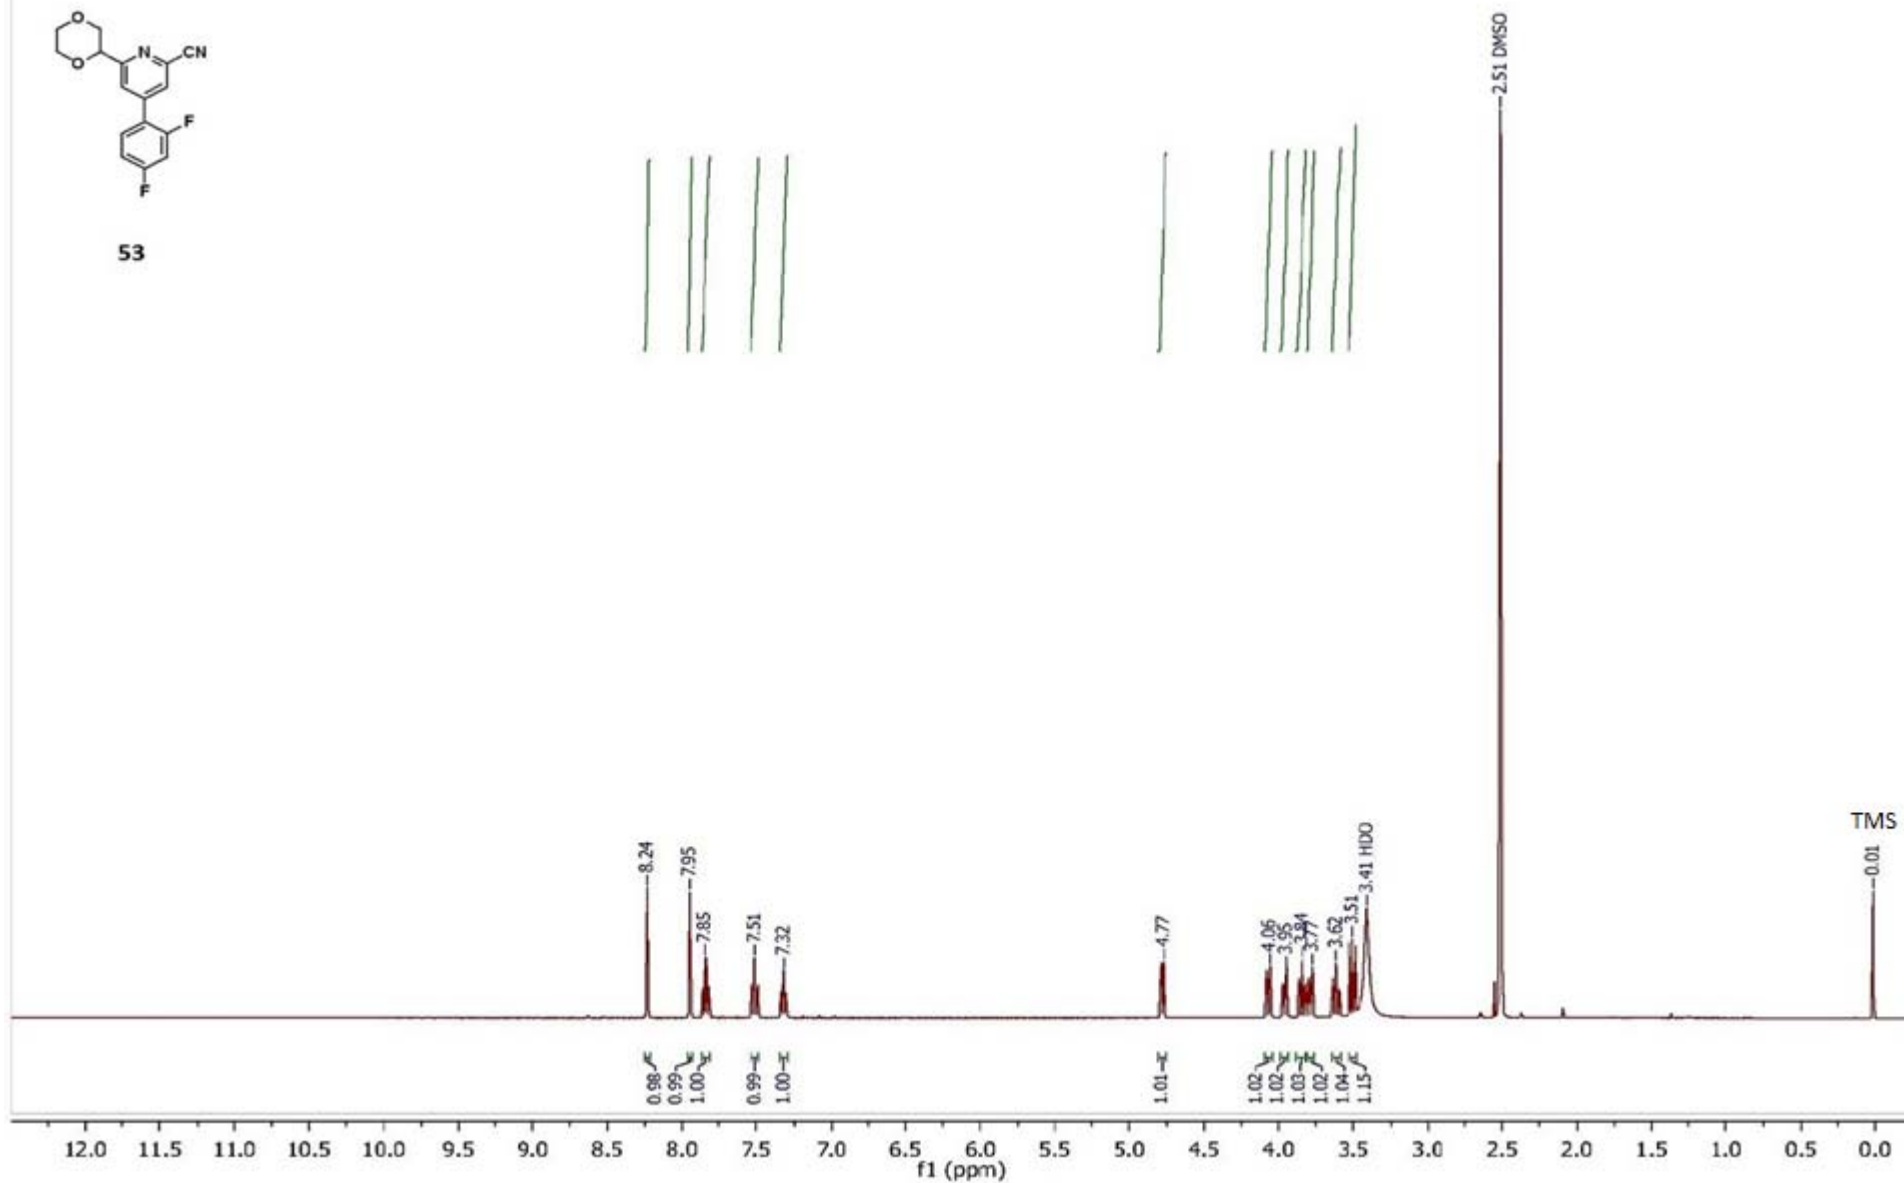

S165

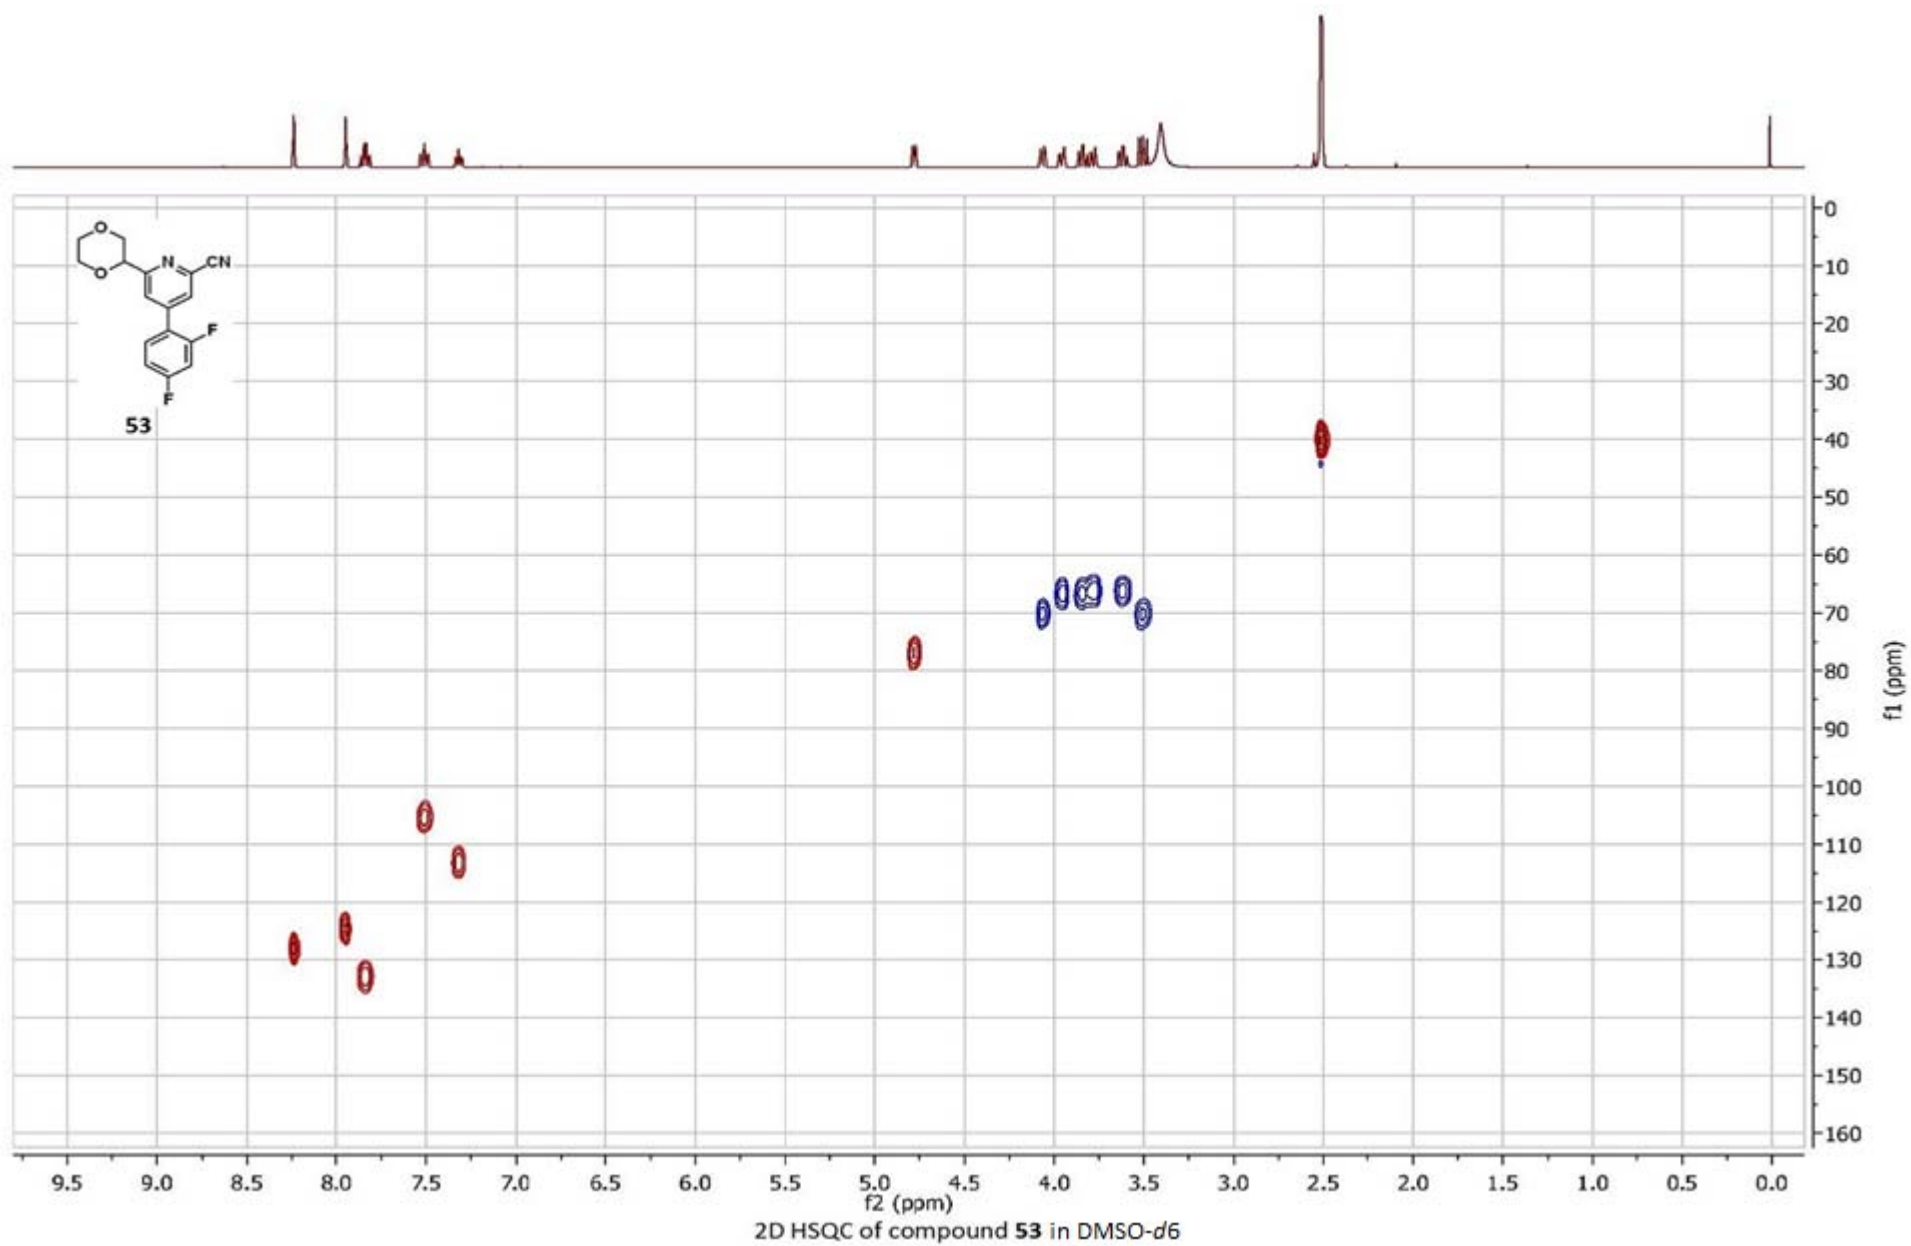

S166

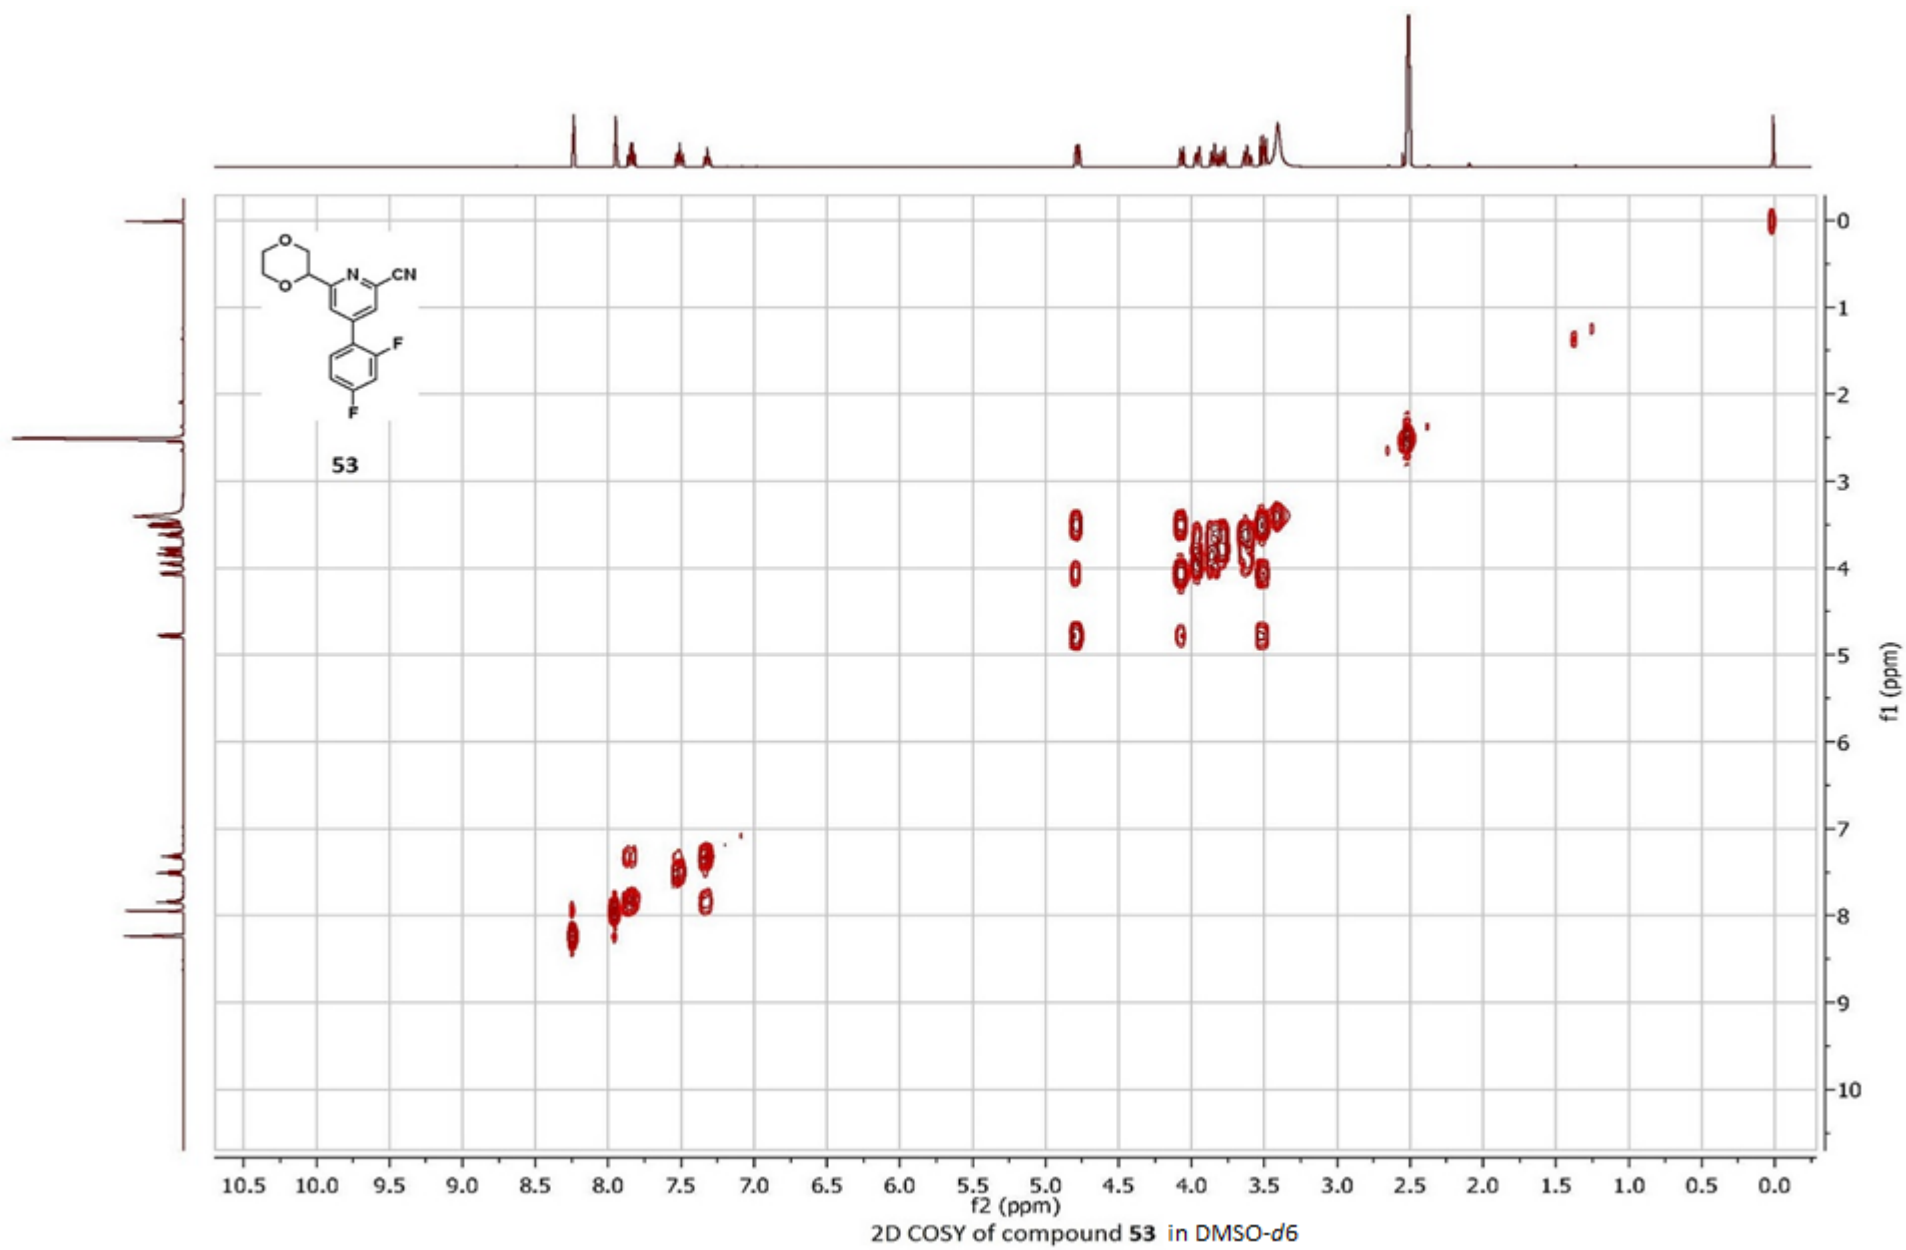

S167

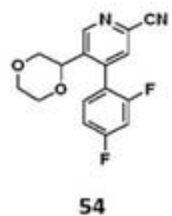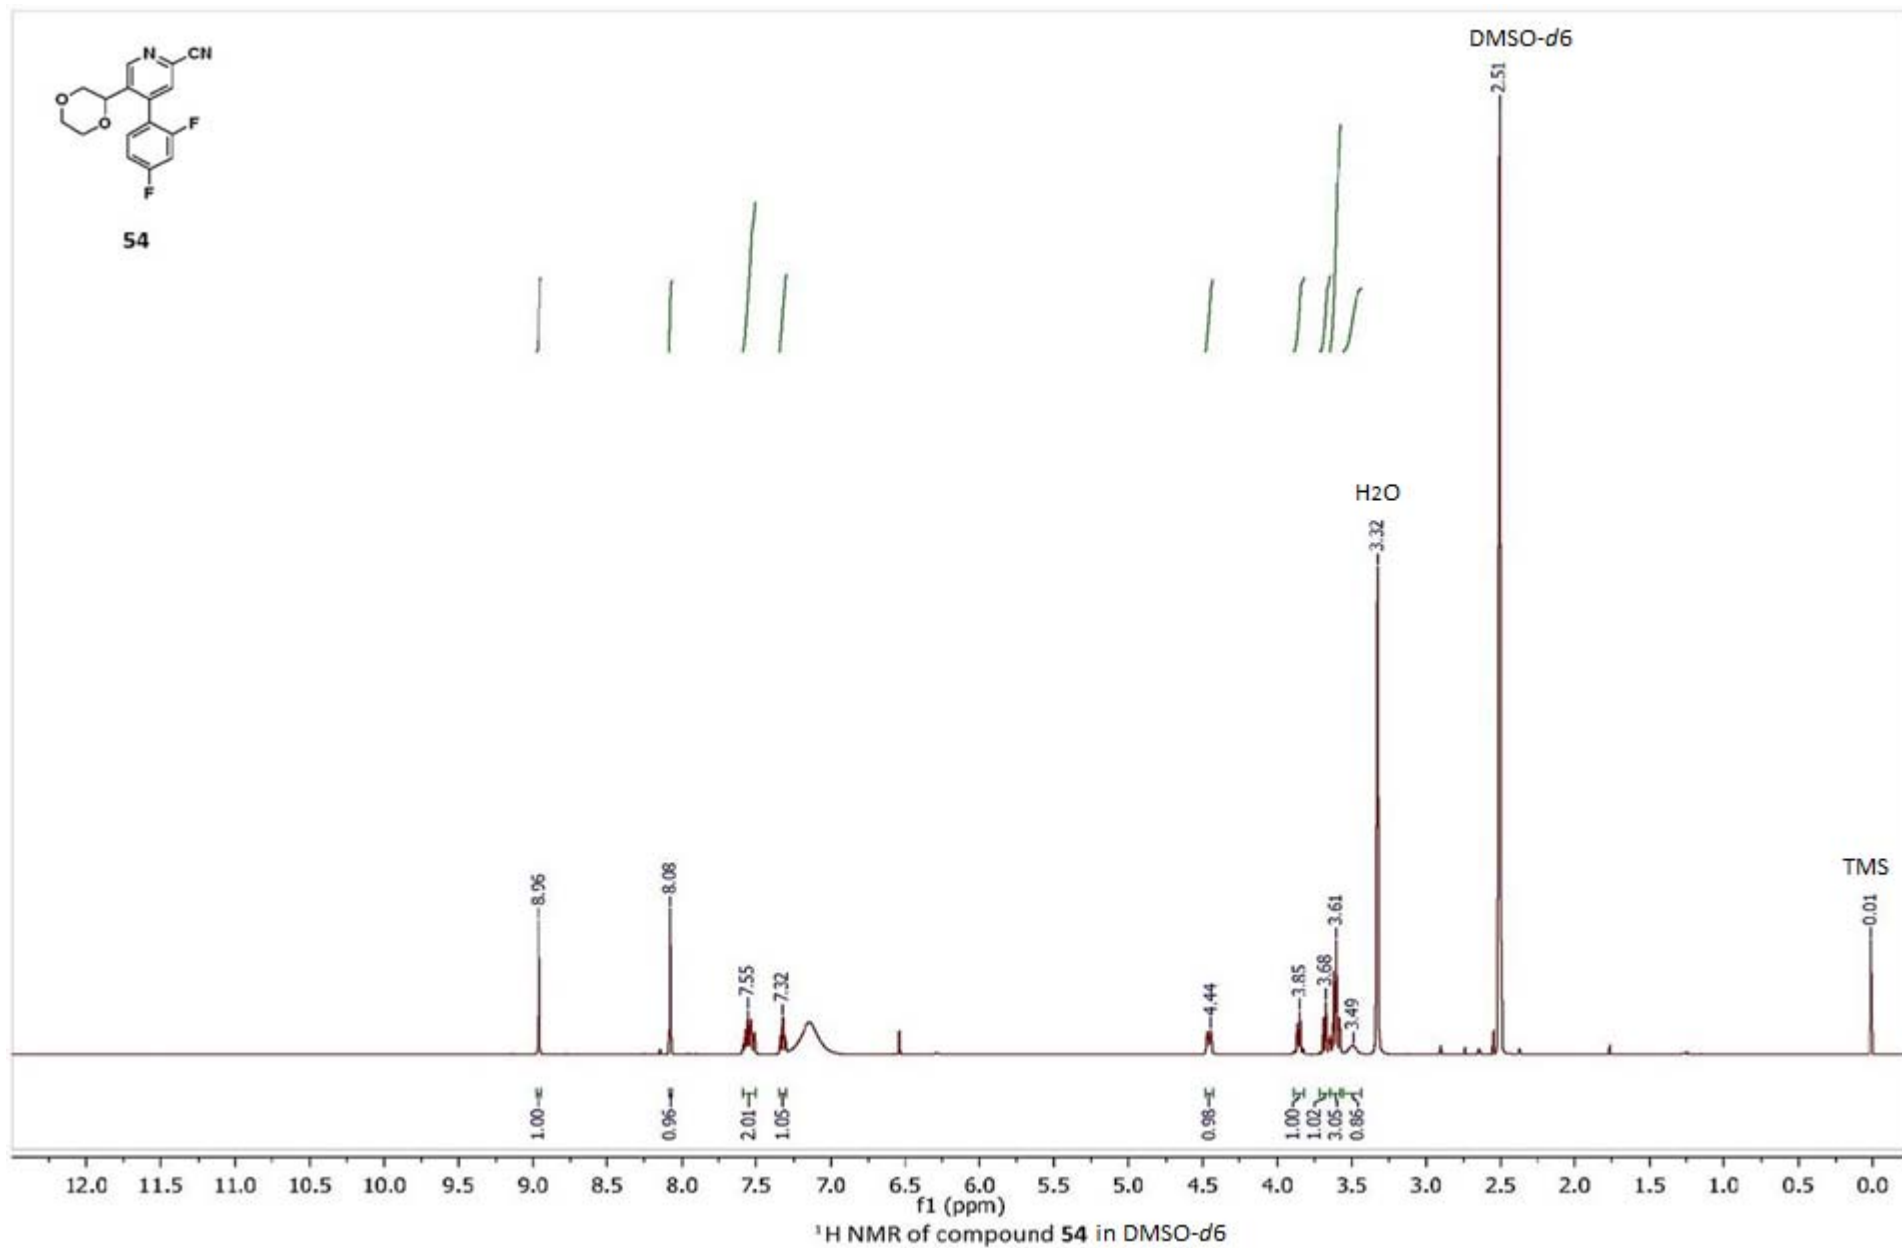

S168



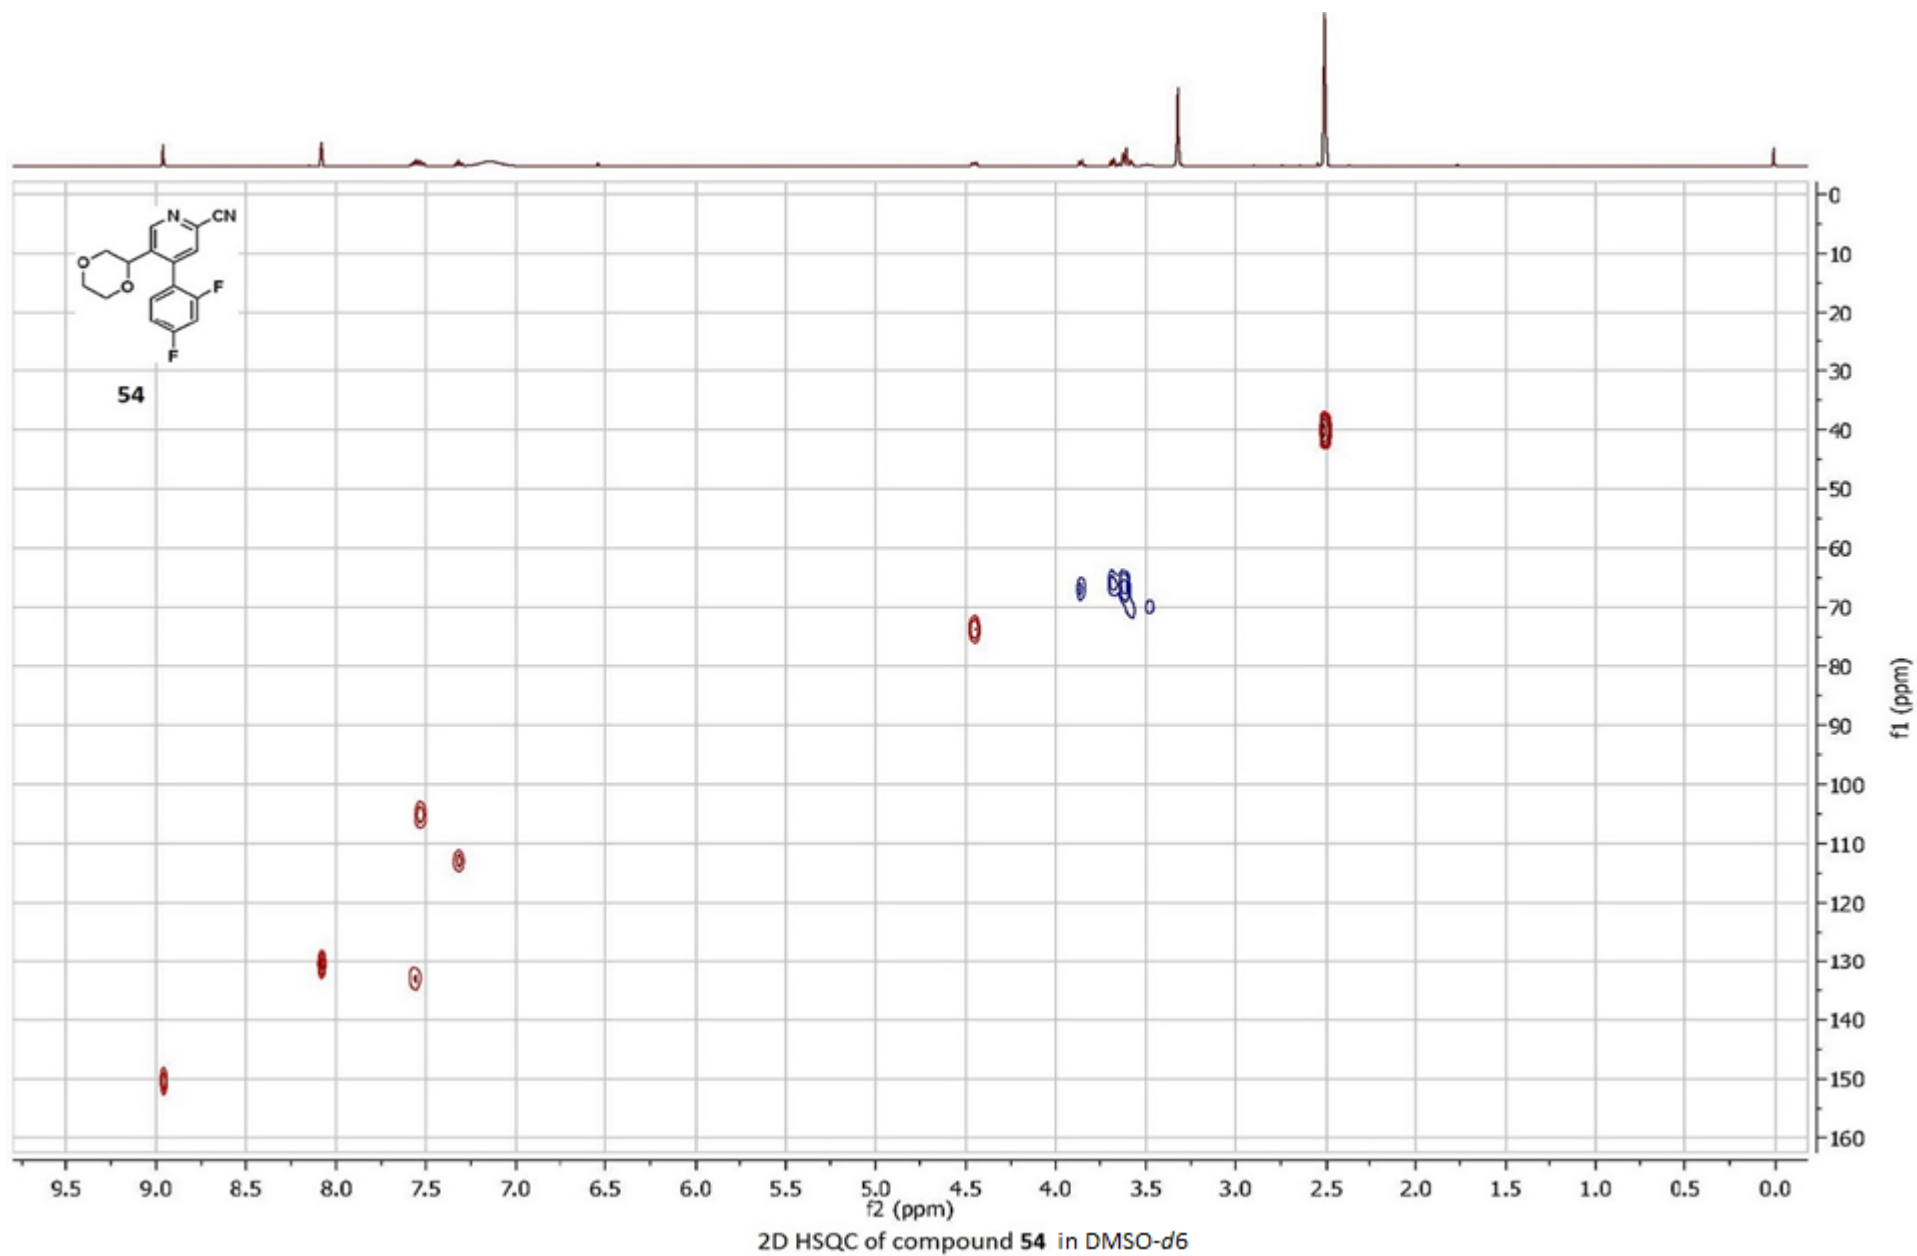

S169

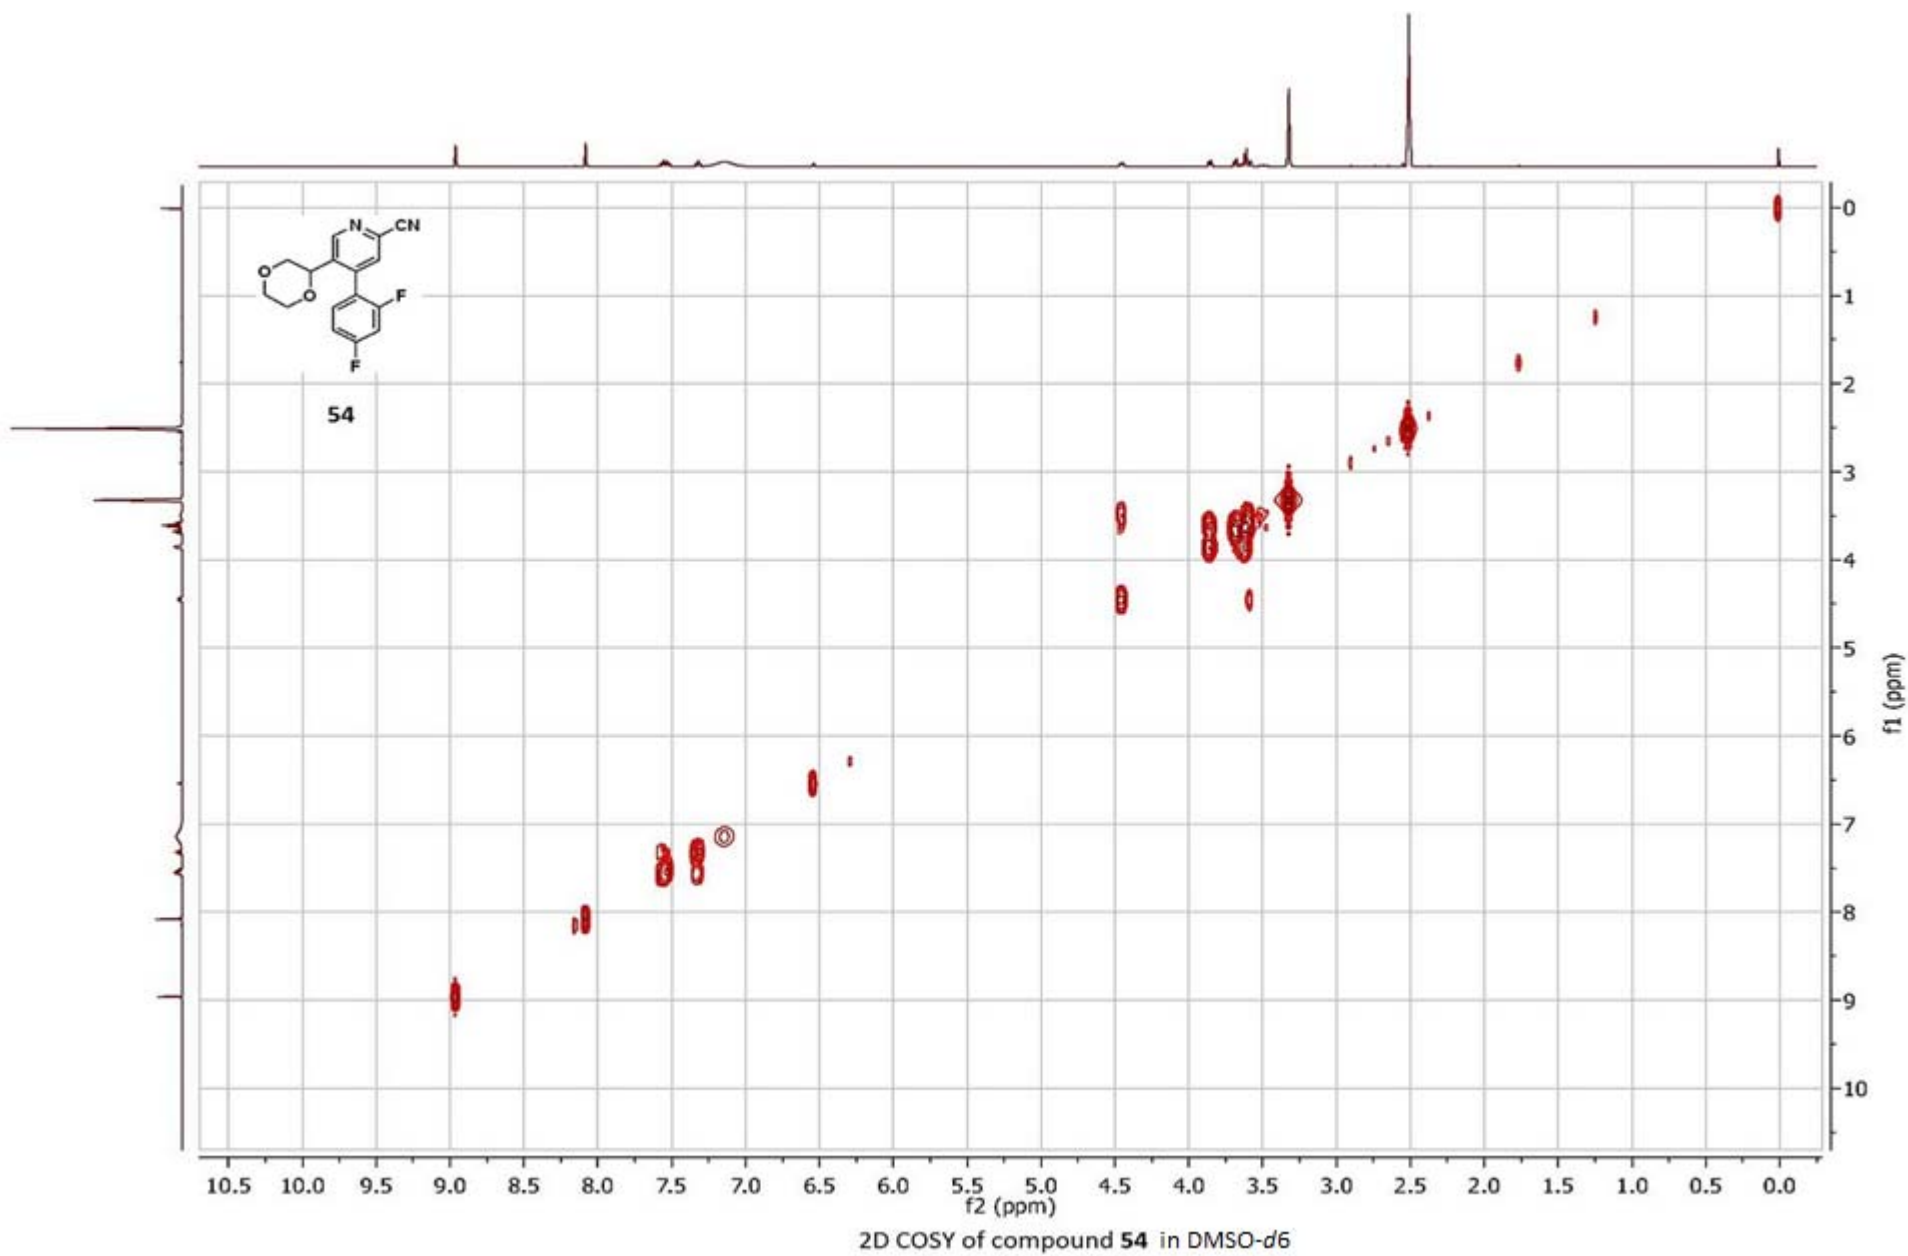

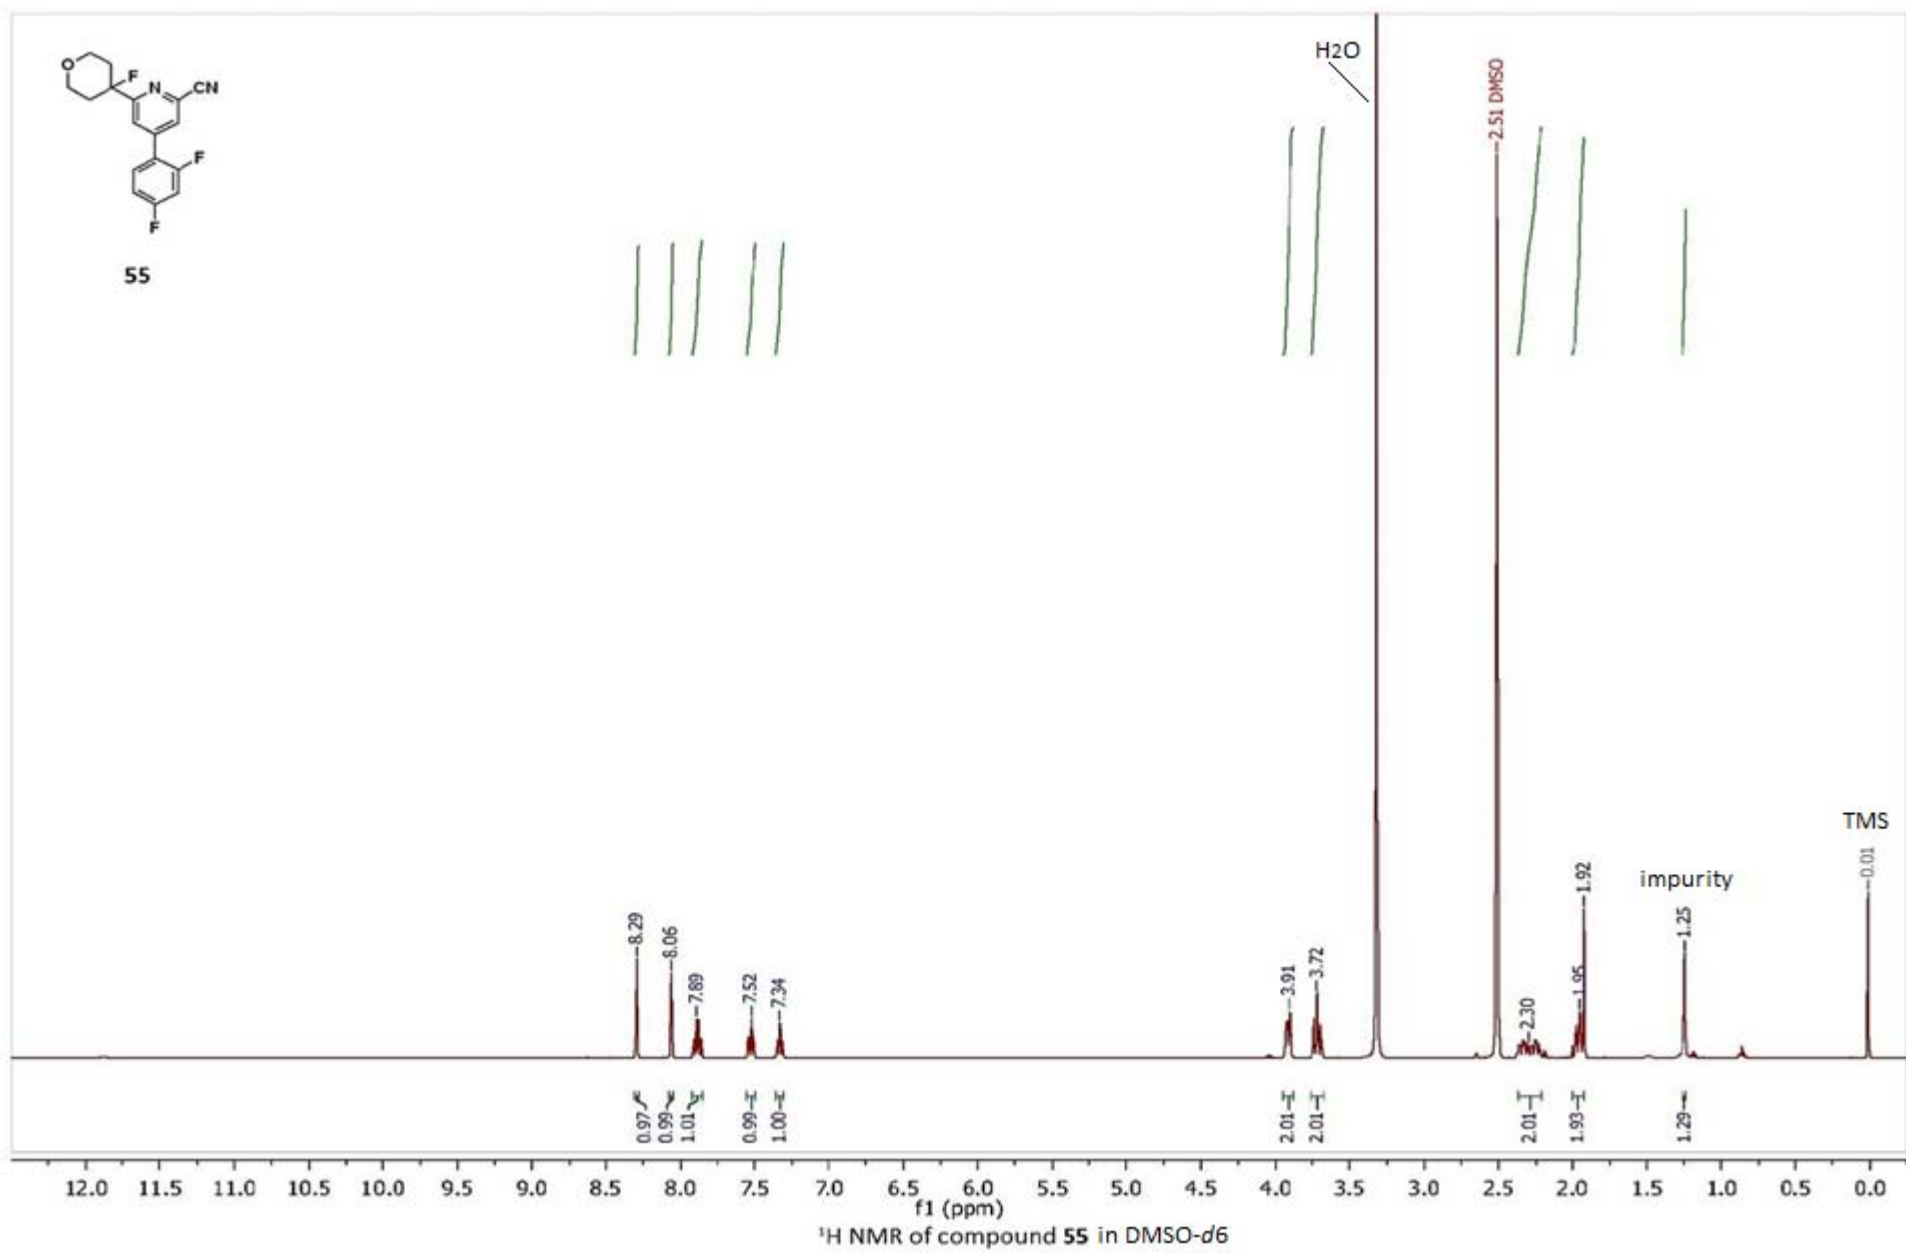

S171

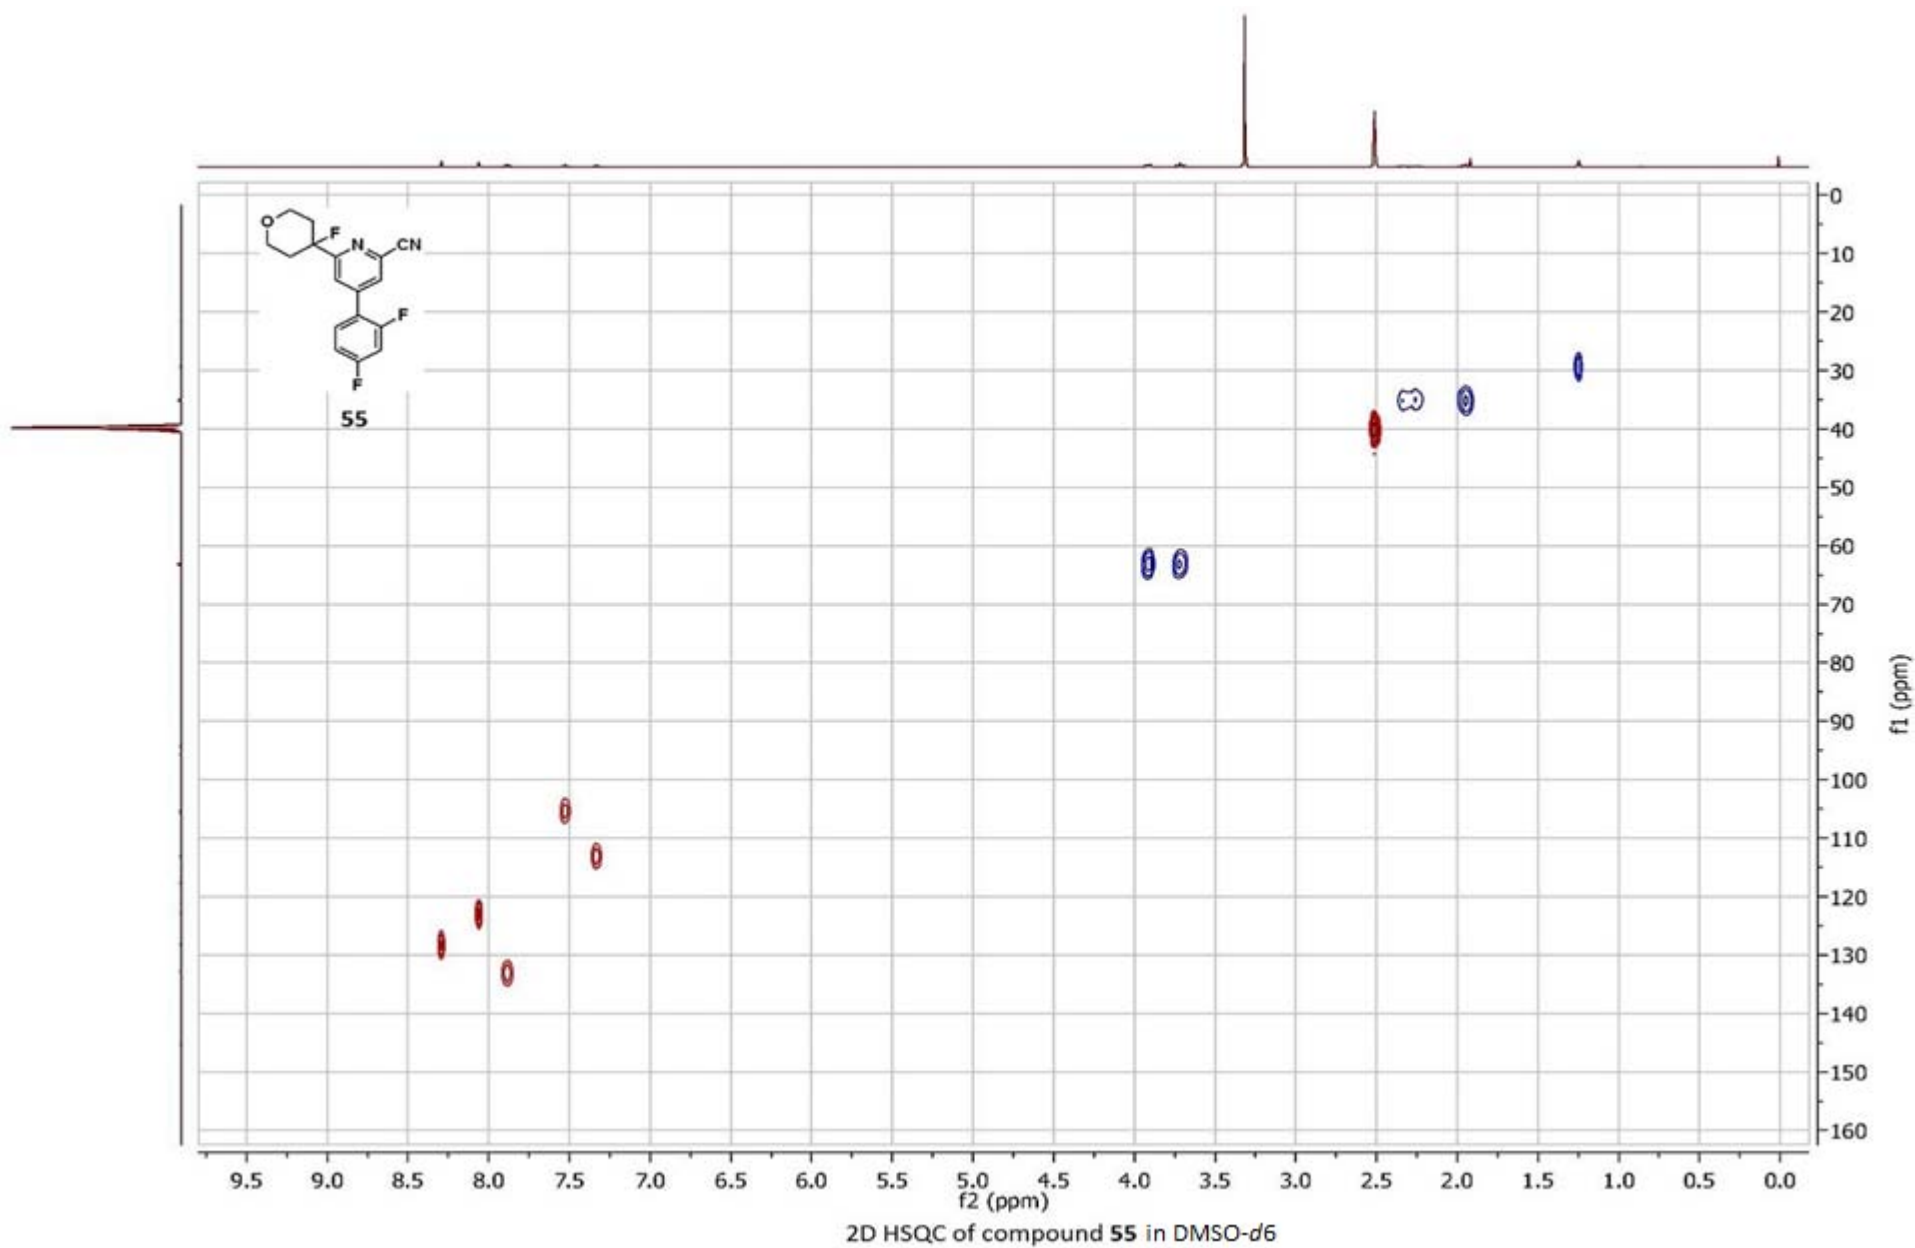

S172

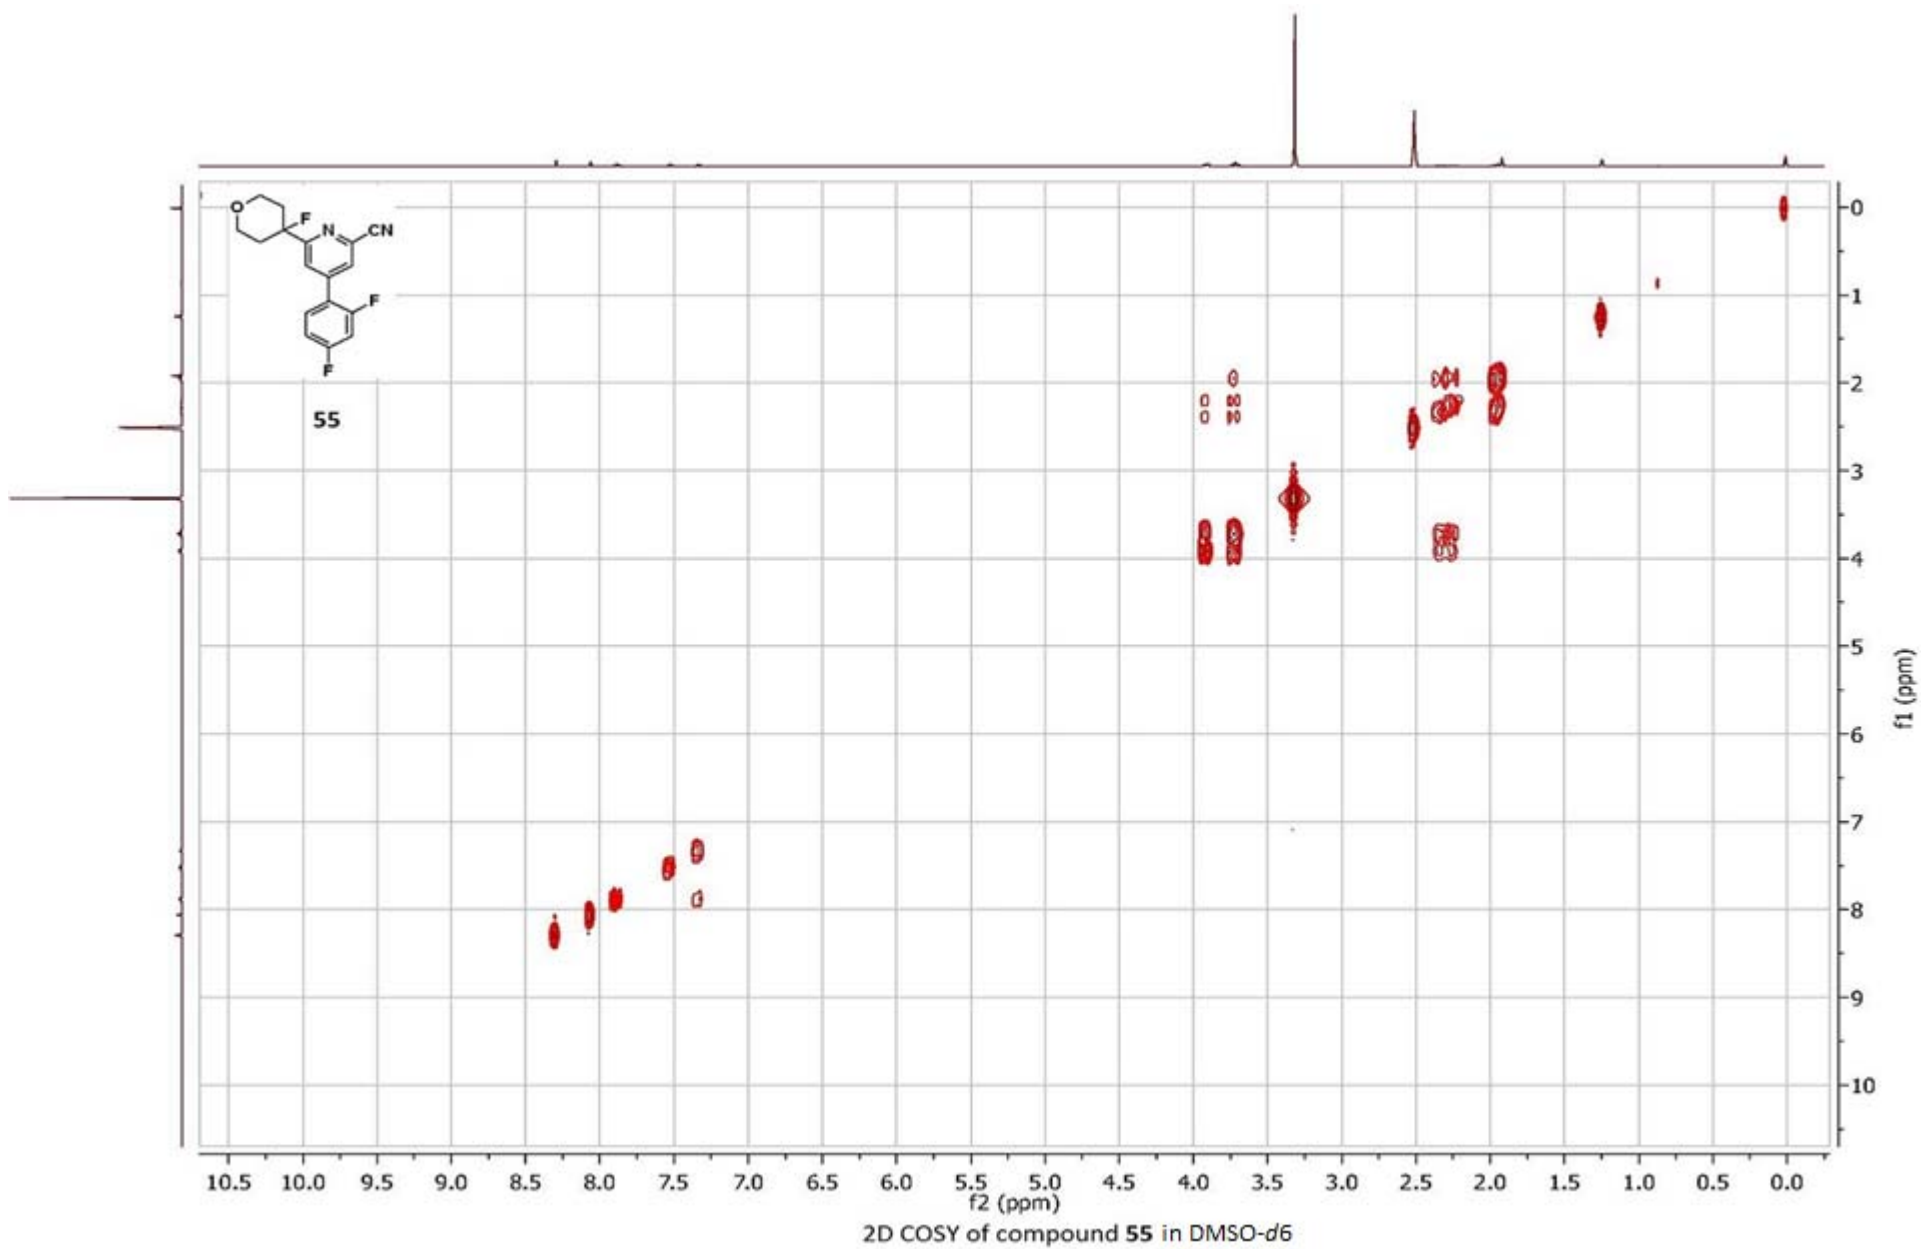

S173

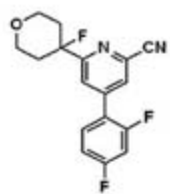

55

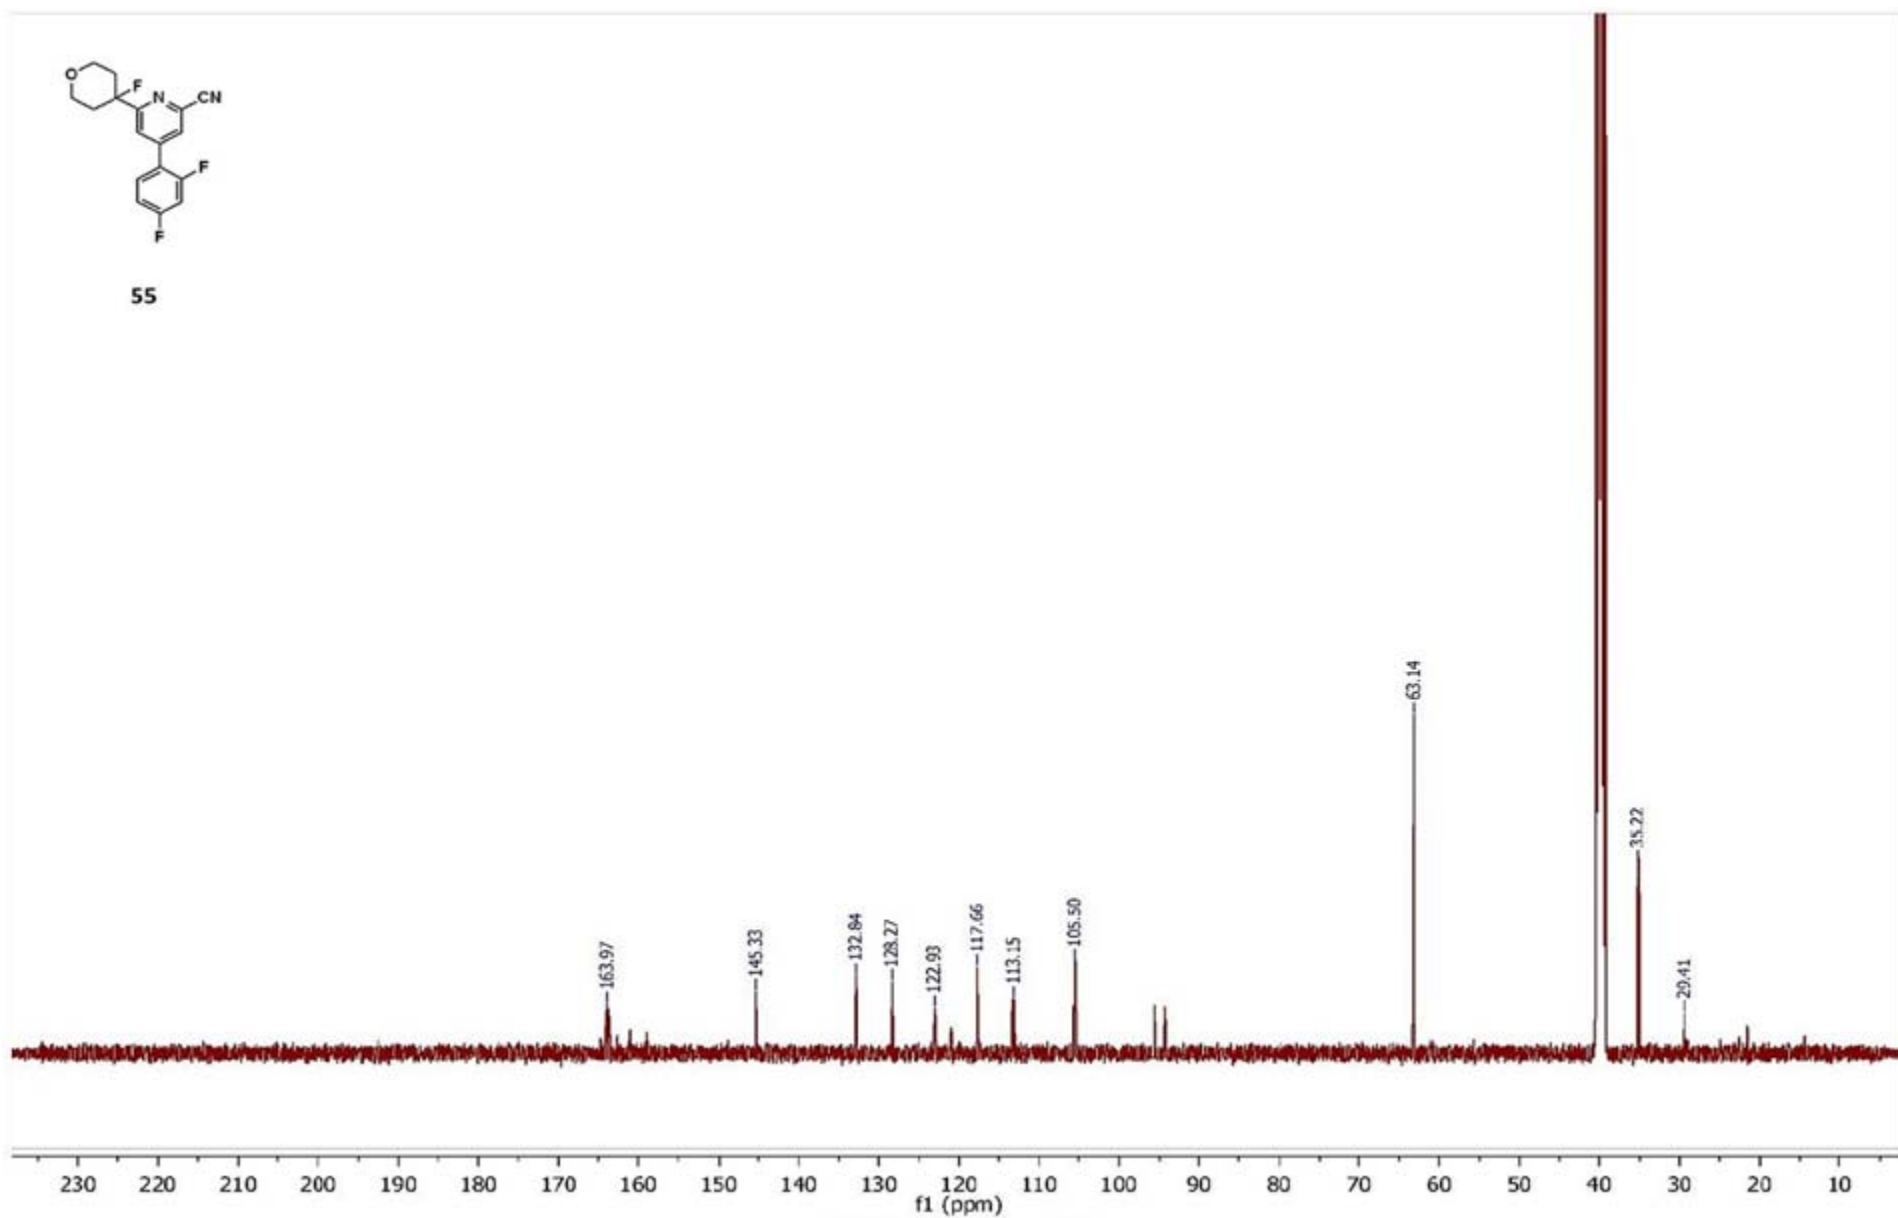

S174

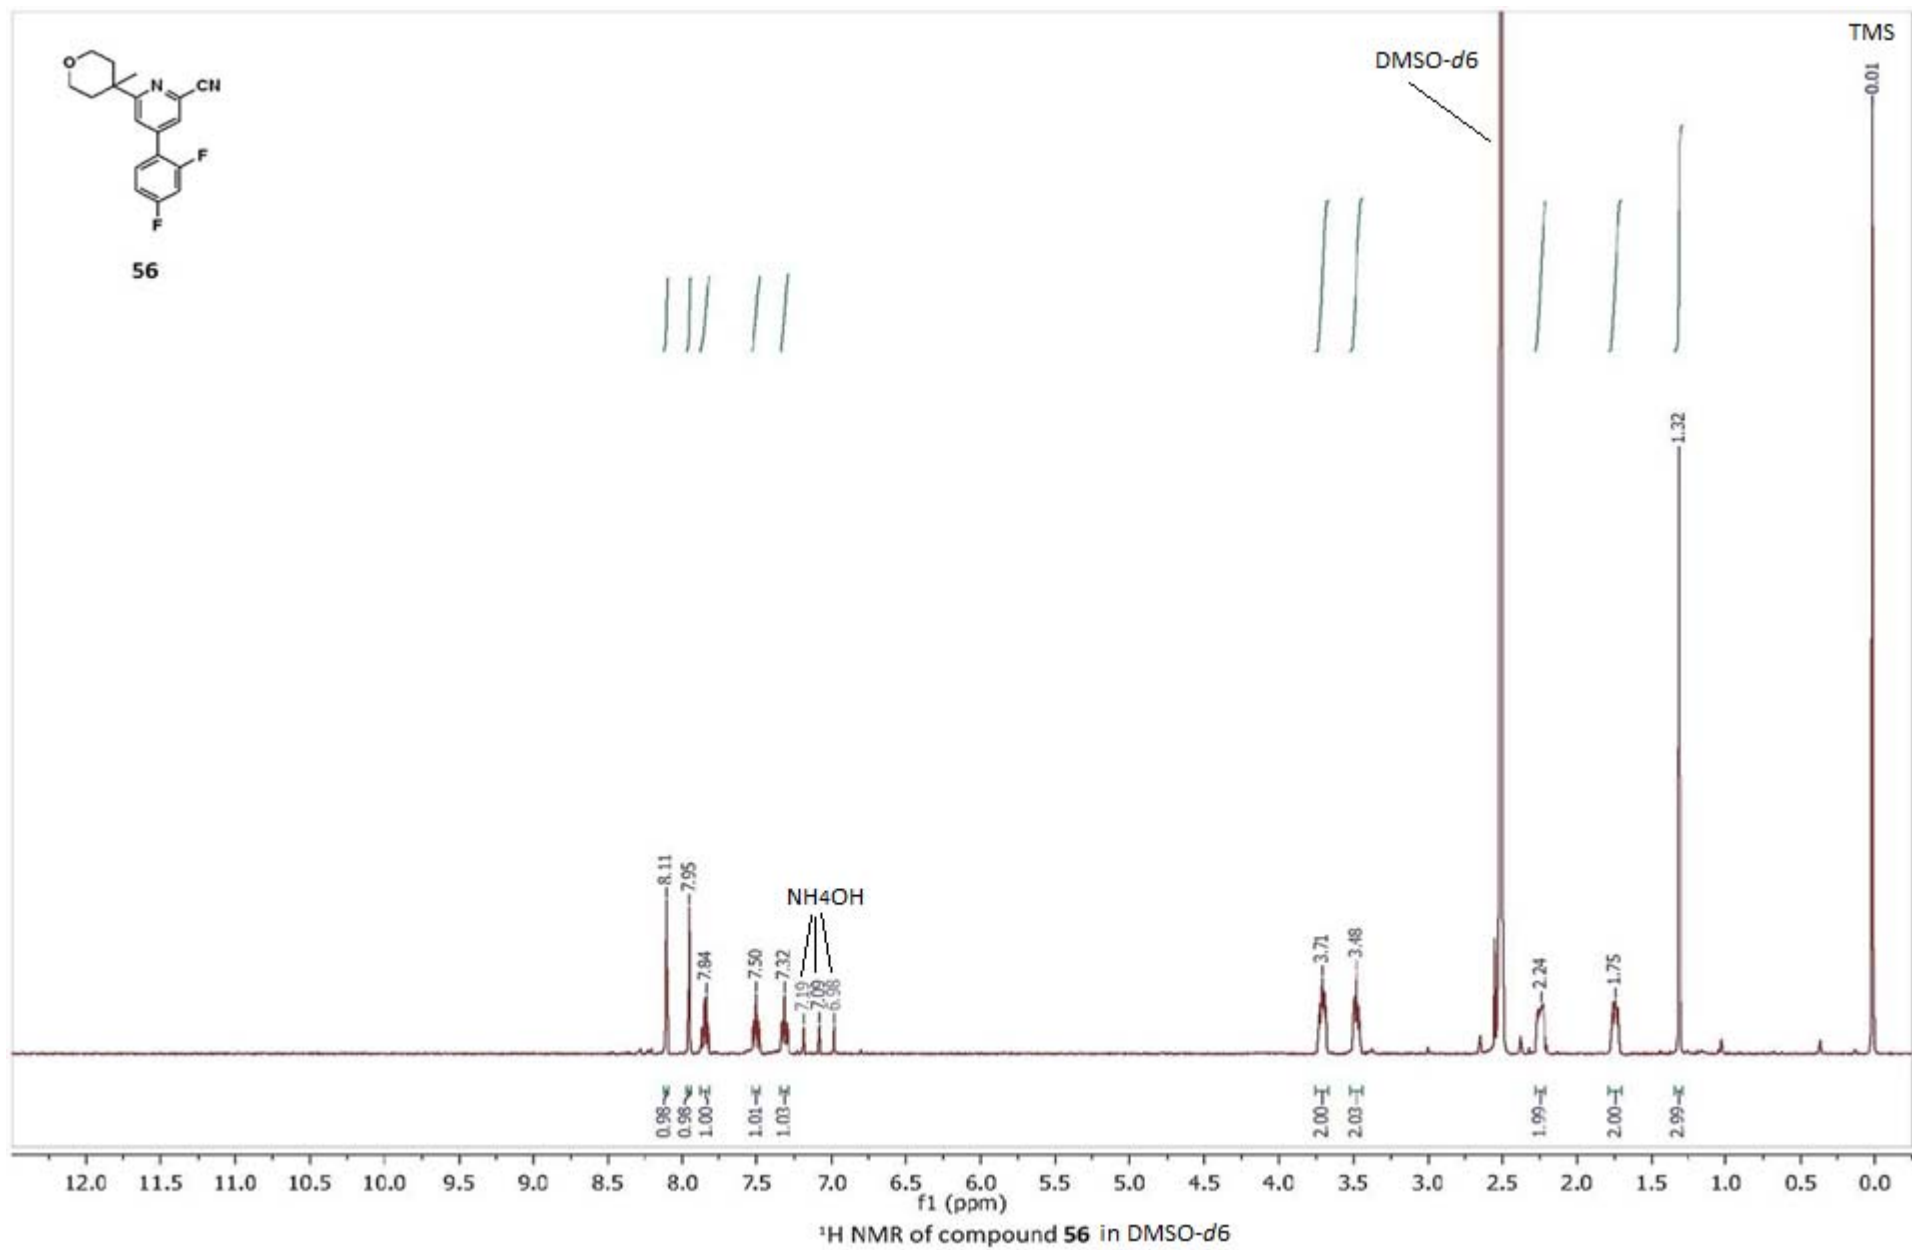

S175

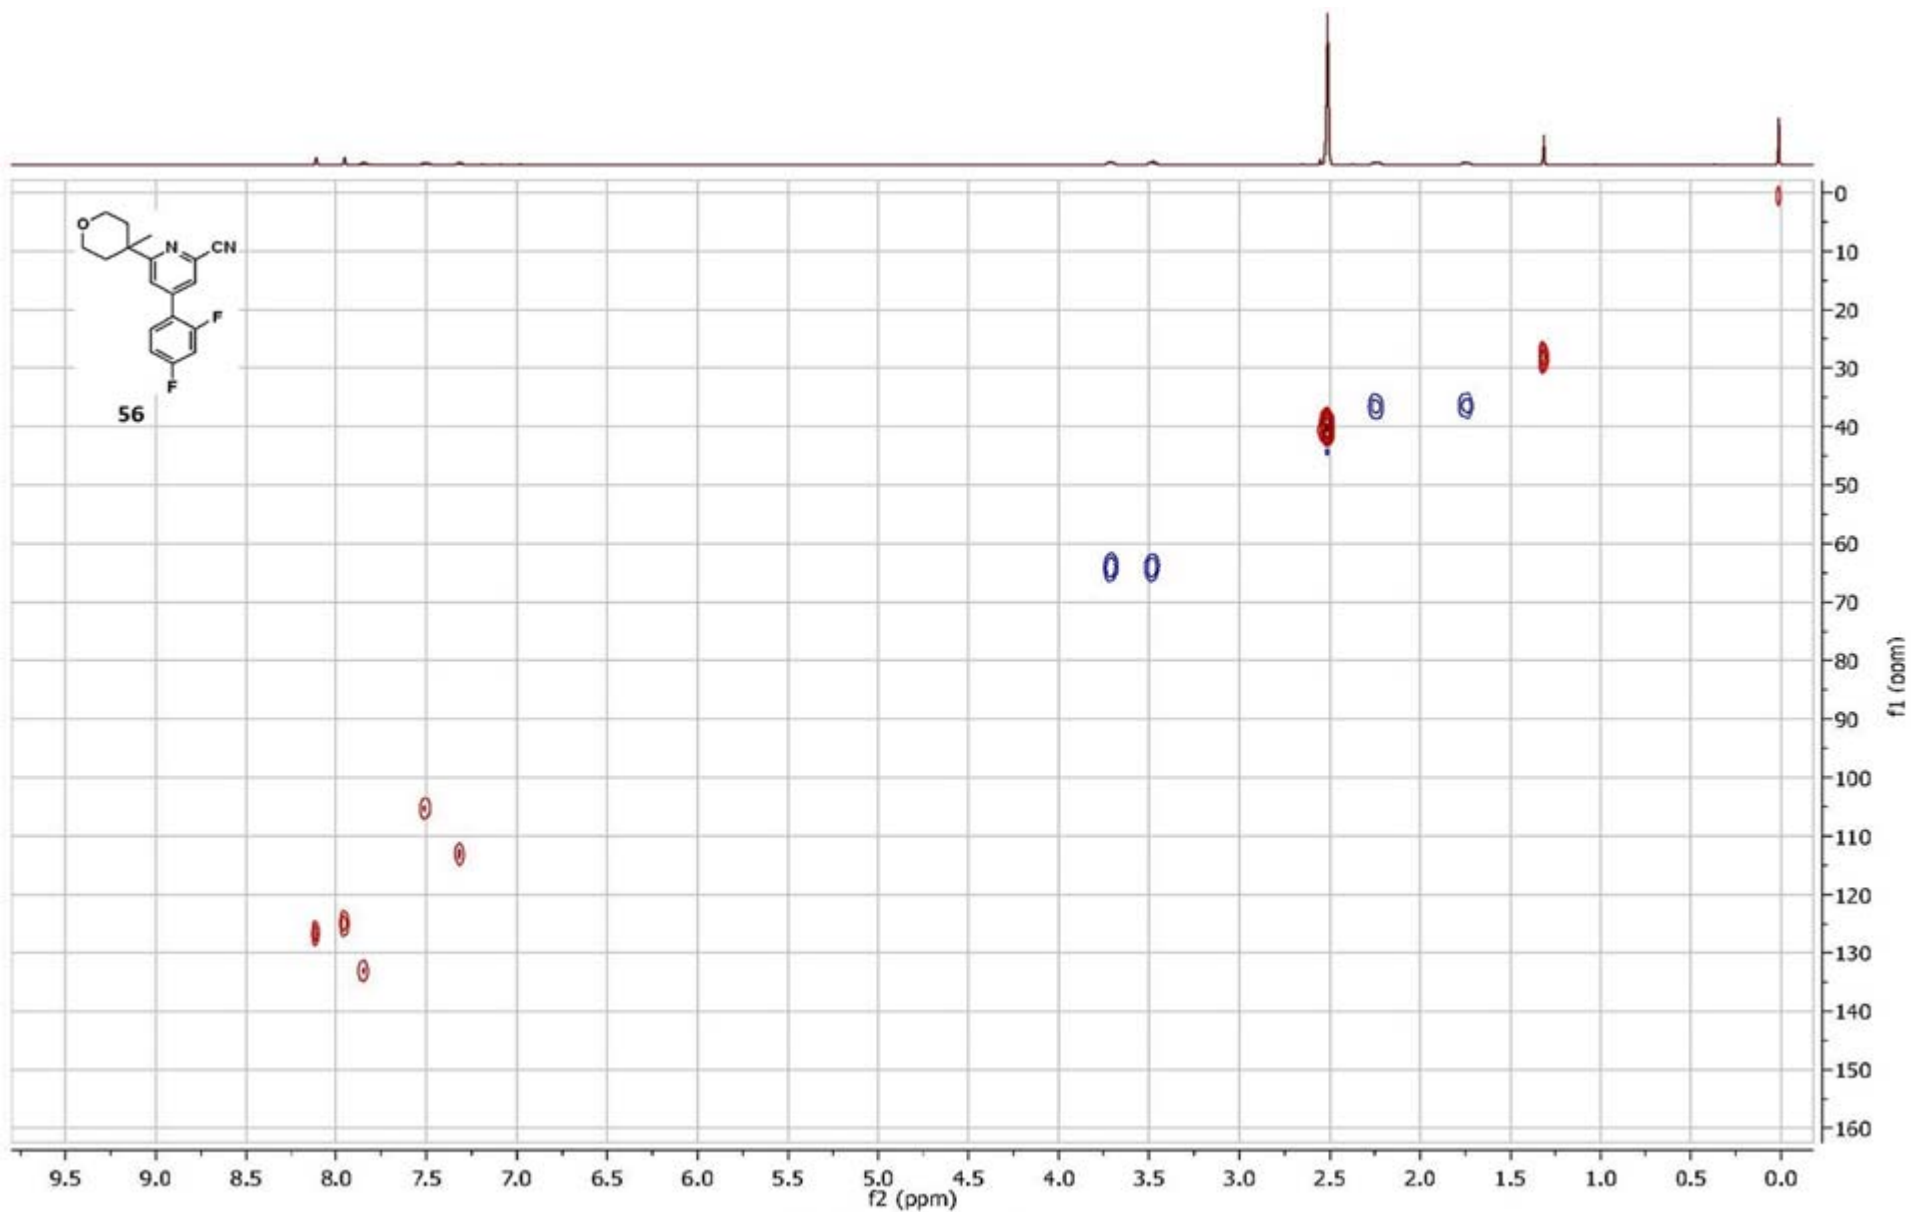

2D HSQC of compound 56 in DMSO-d6



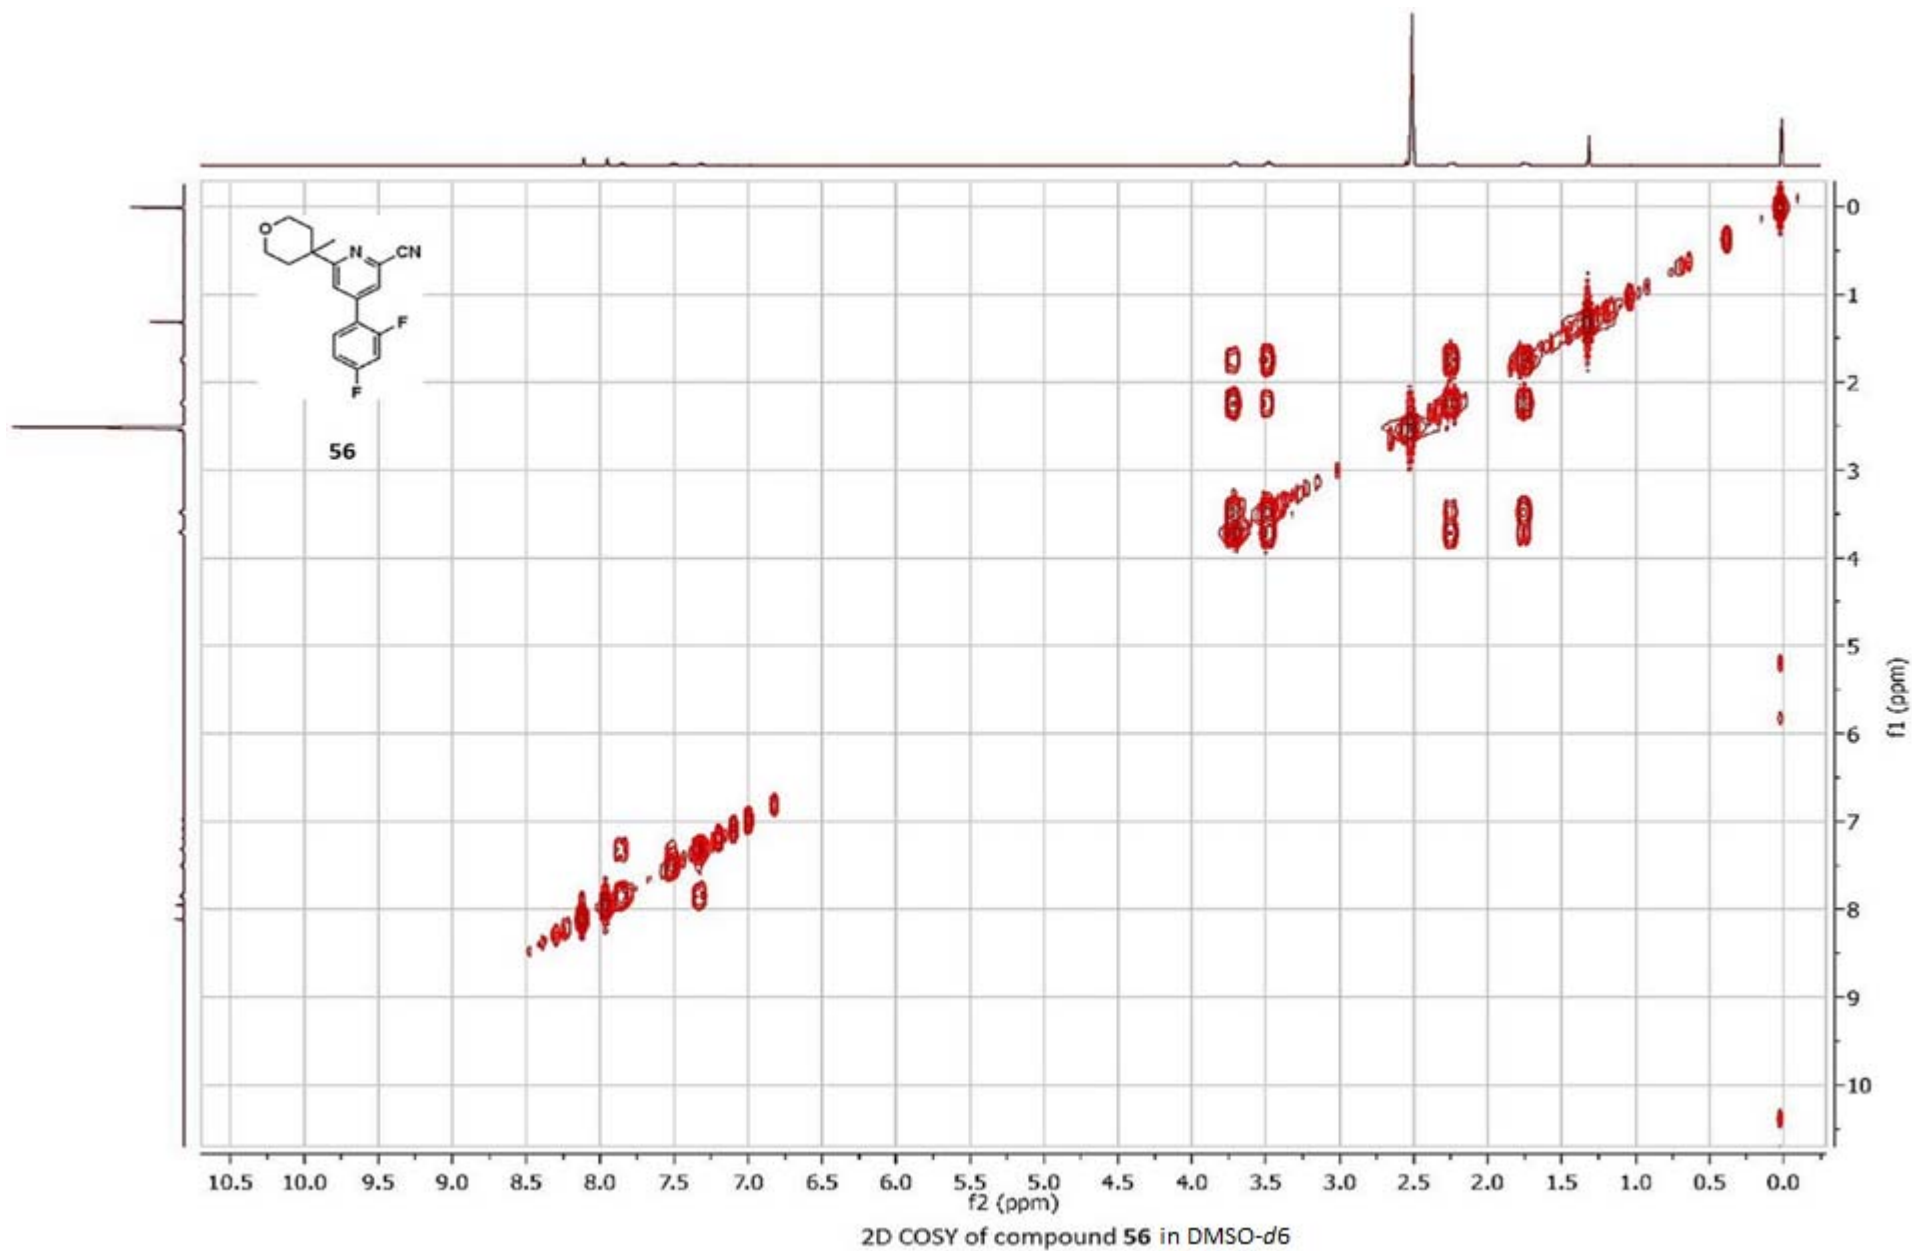

S177

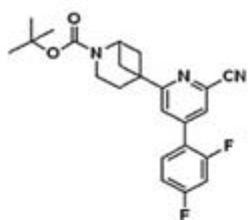

57

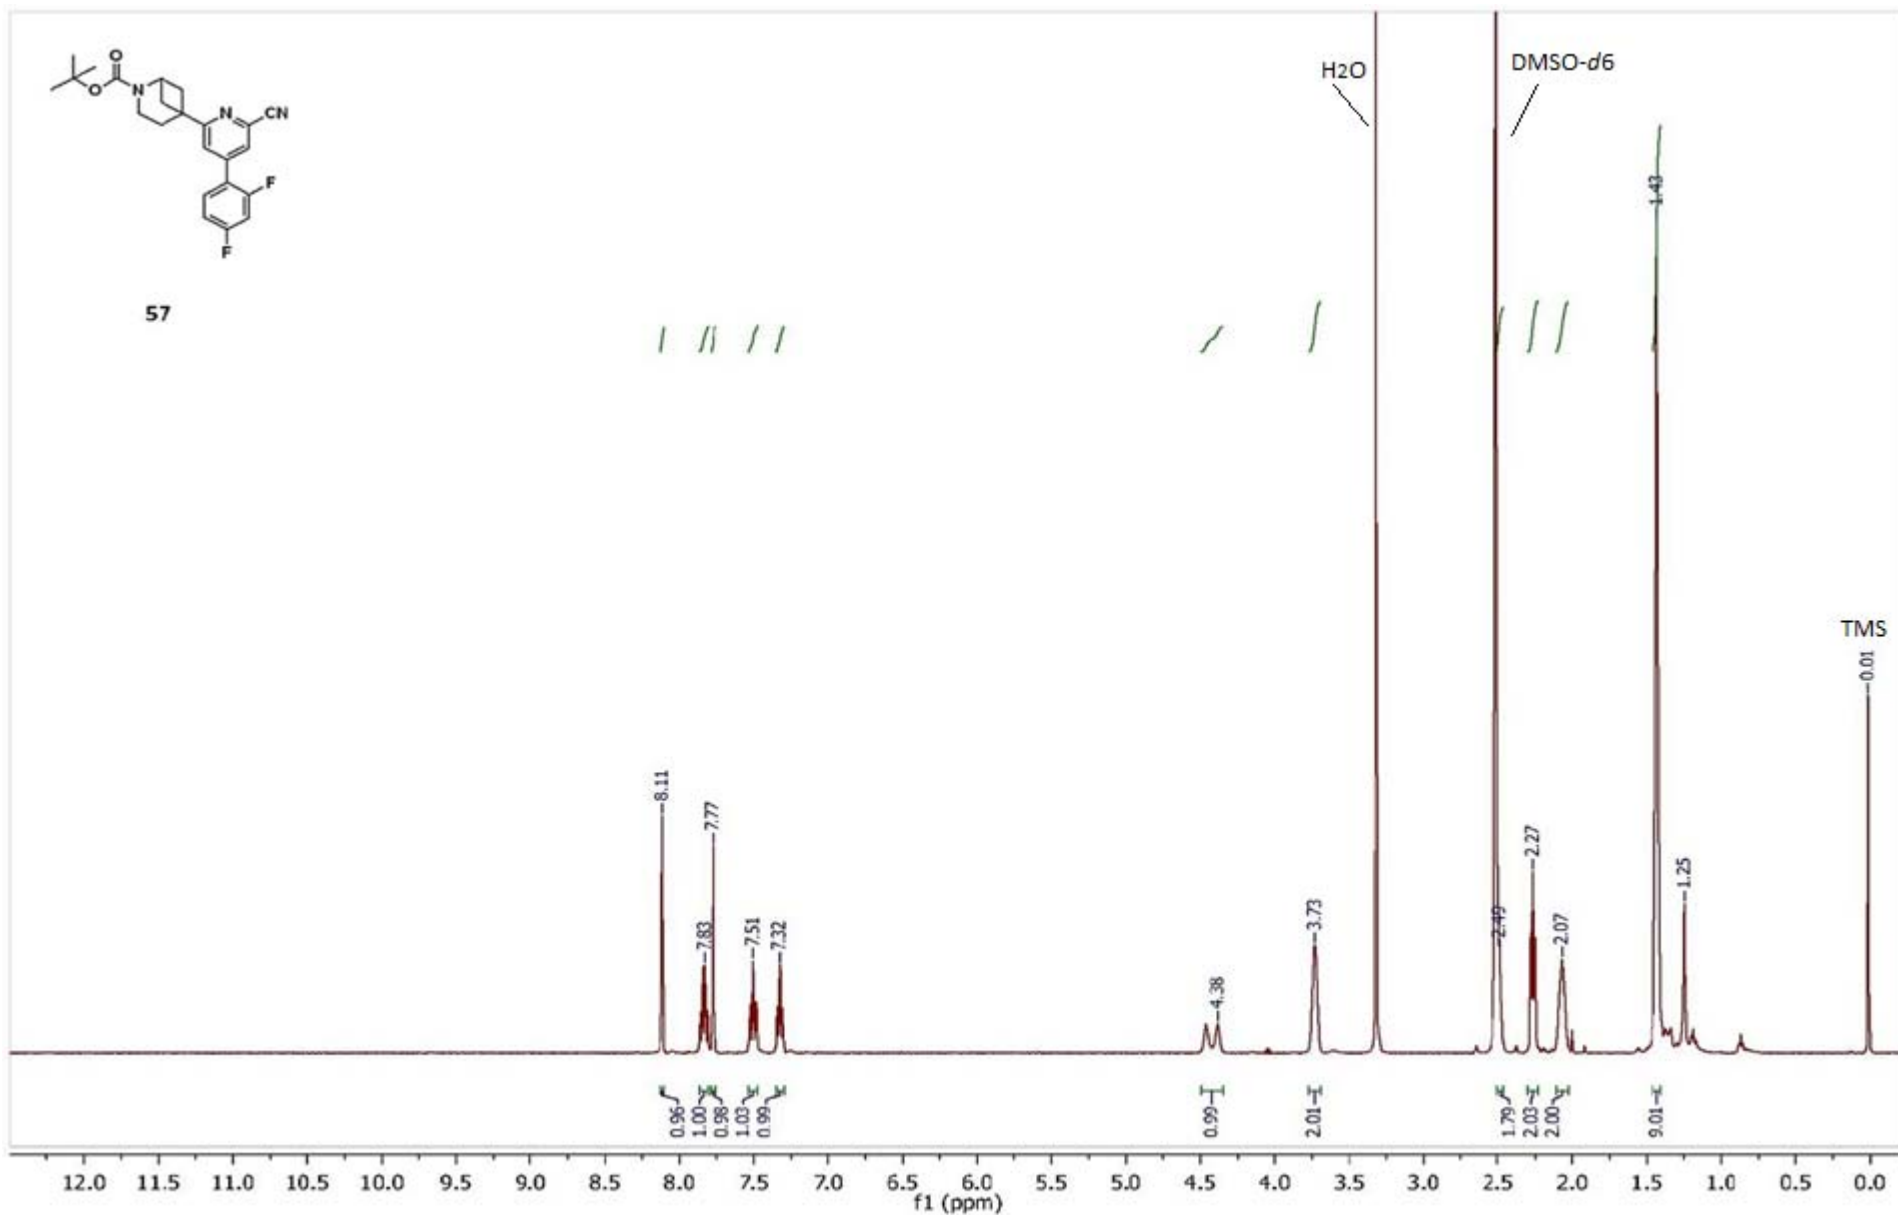

<sup>1</sup>H NMR of compound 57 in DMSO-d<sub>6</sub>

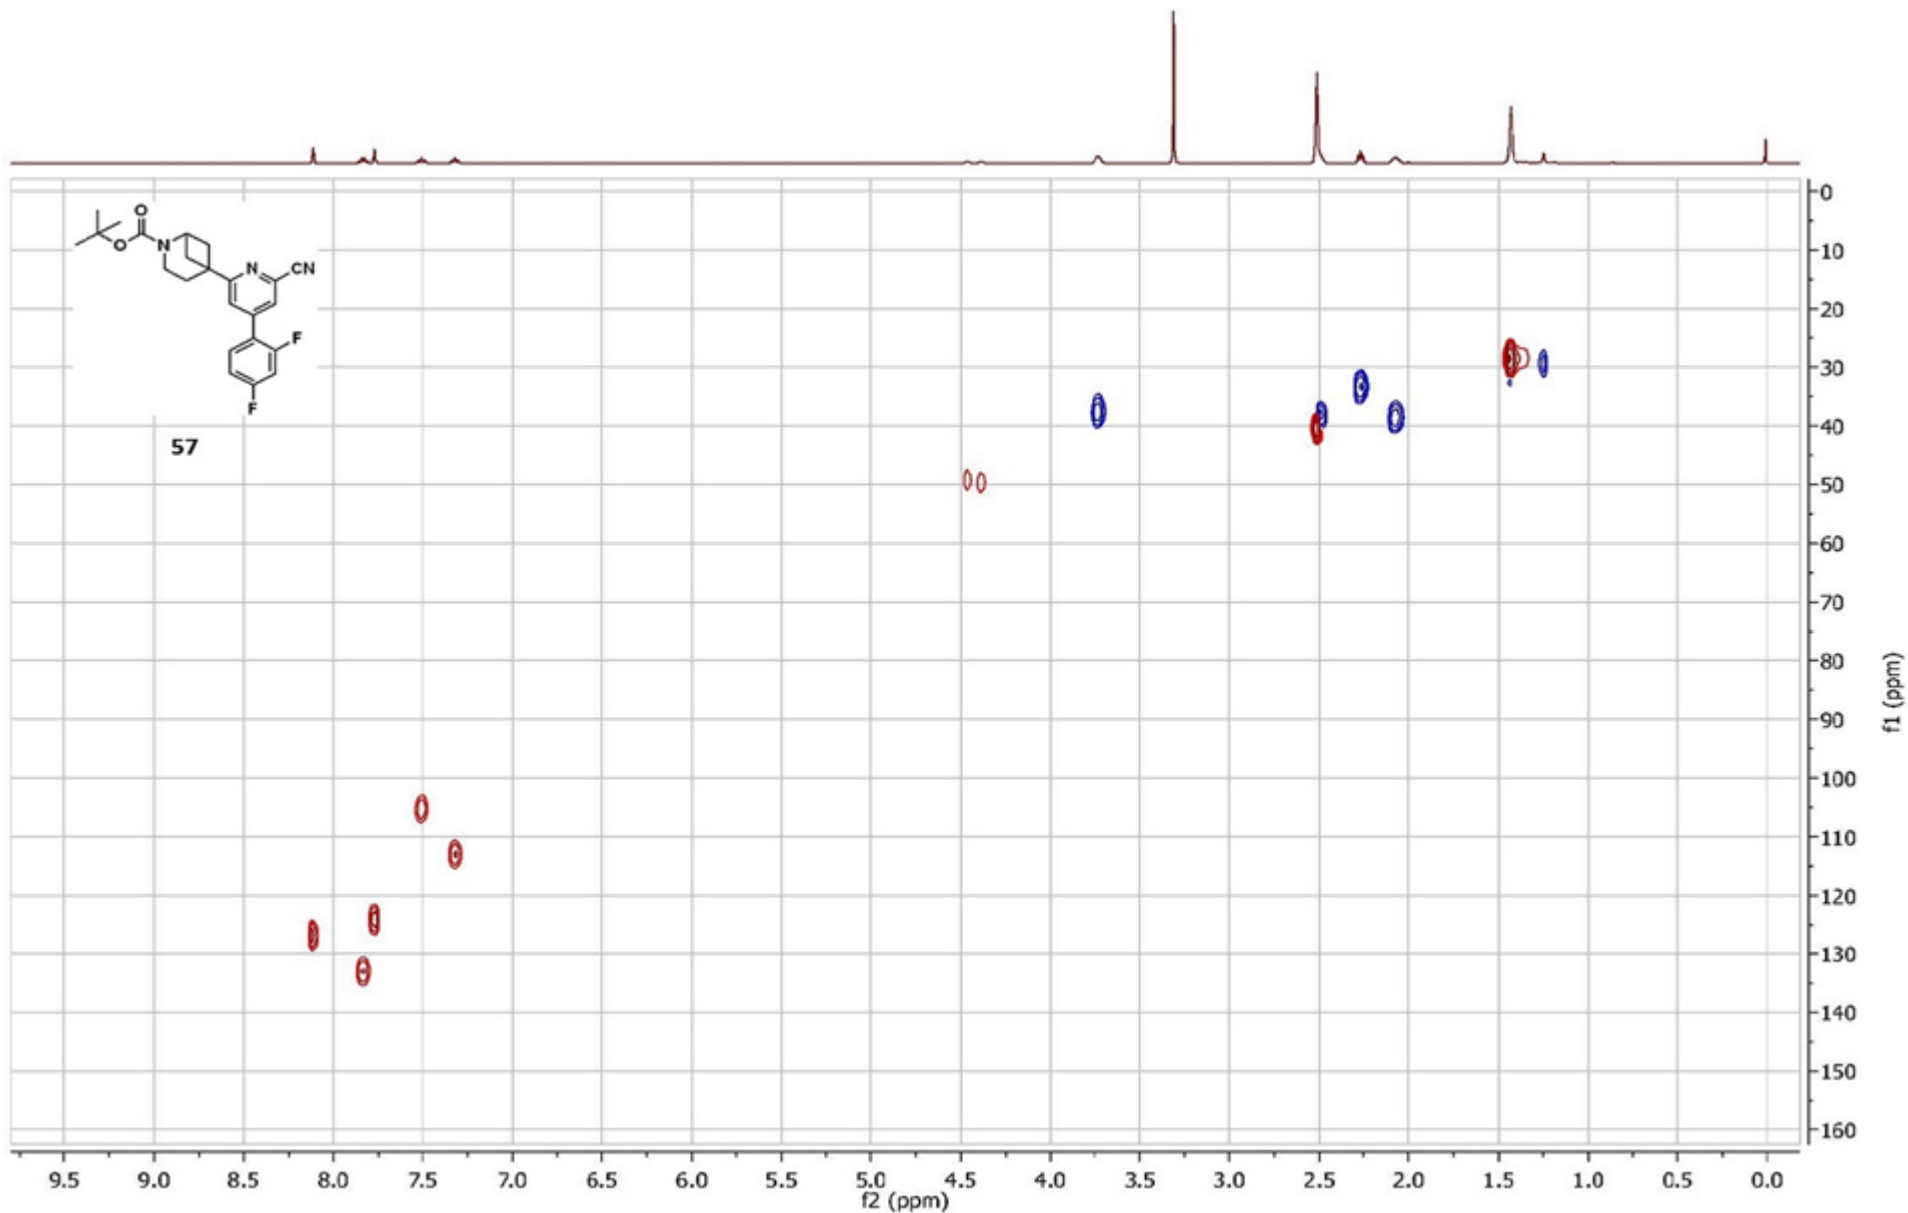

2D HSQC of compound 57 in DMSO-d6

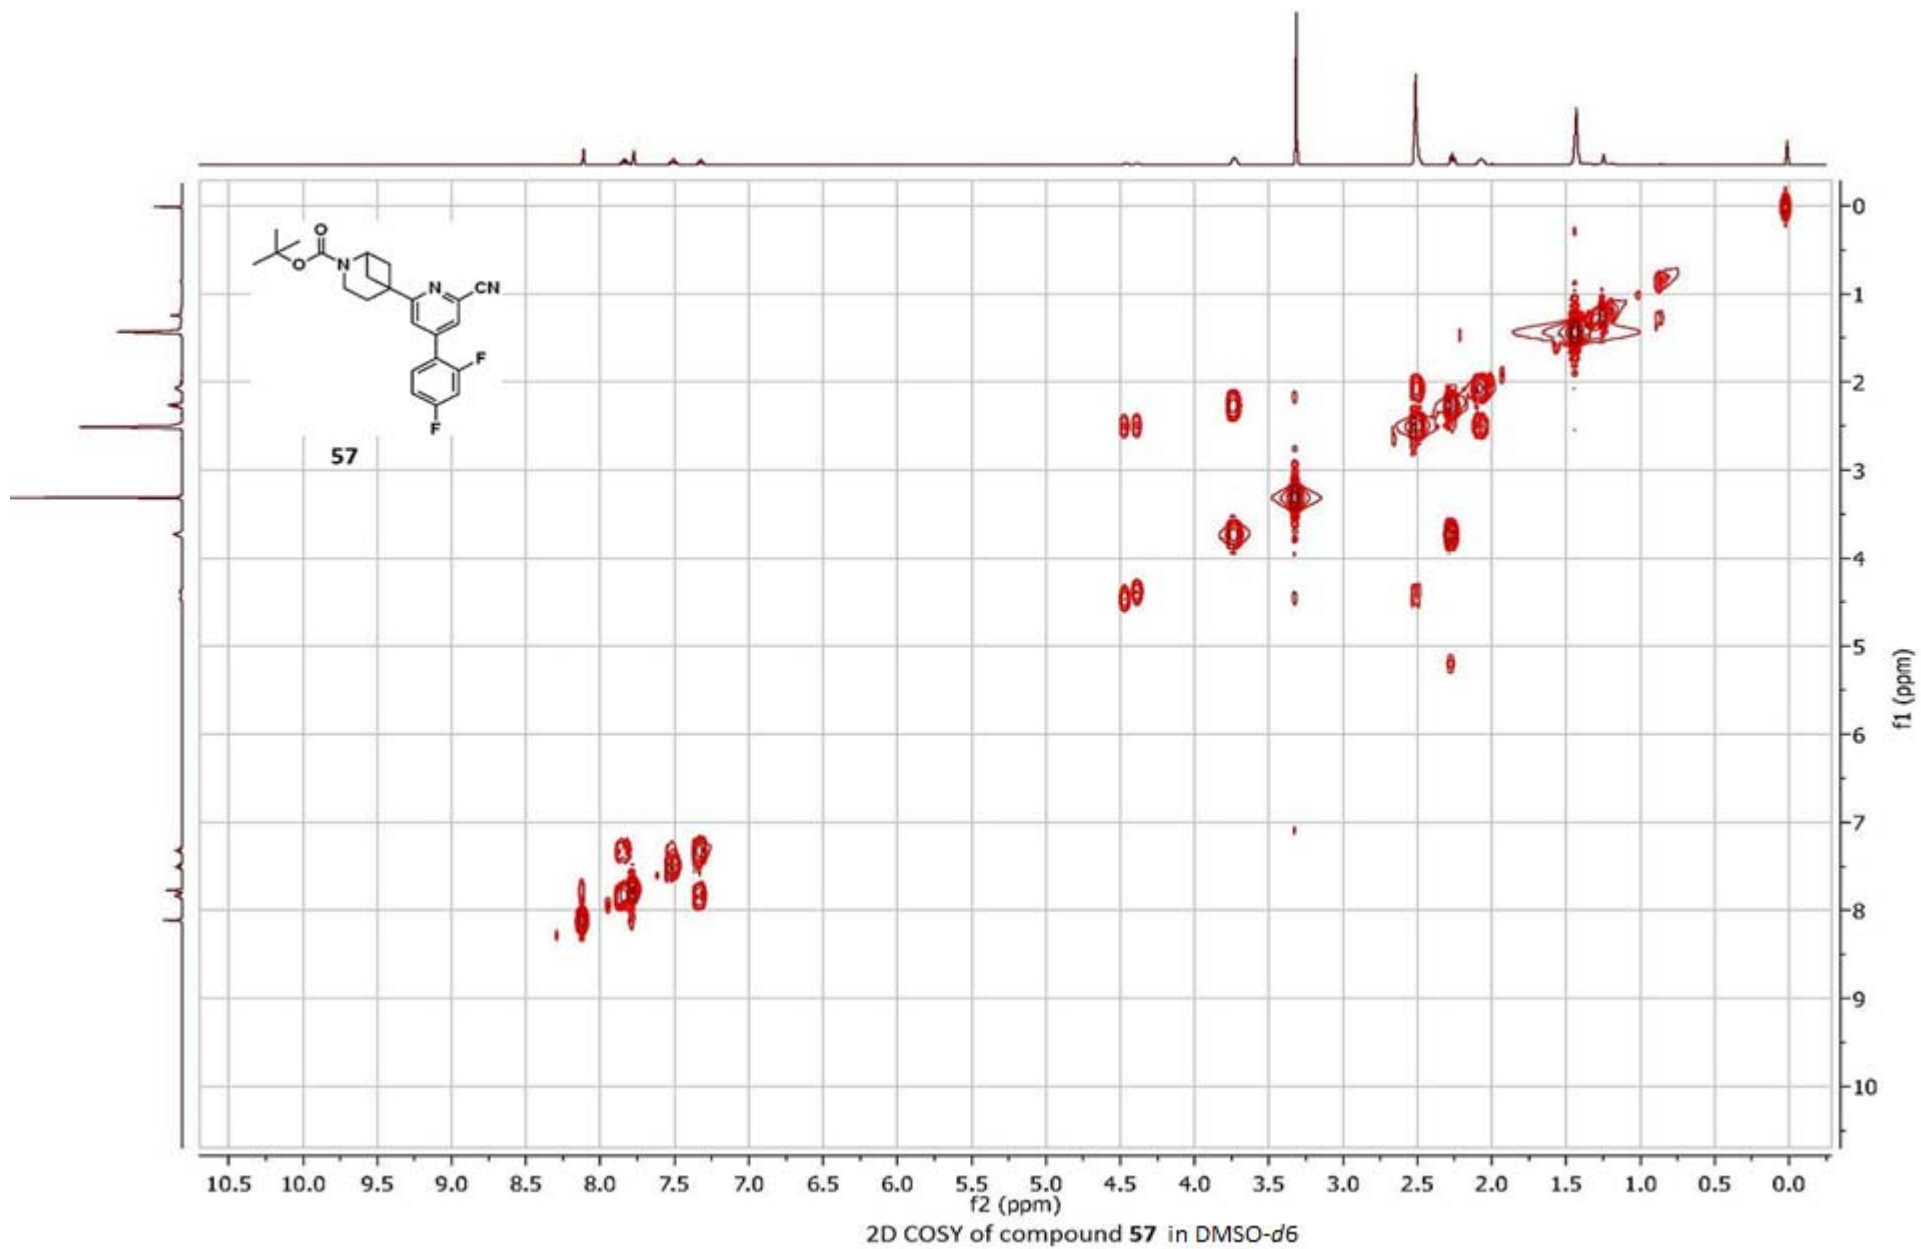

S180

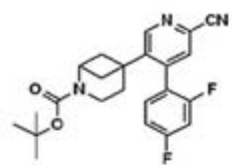

58

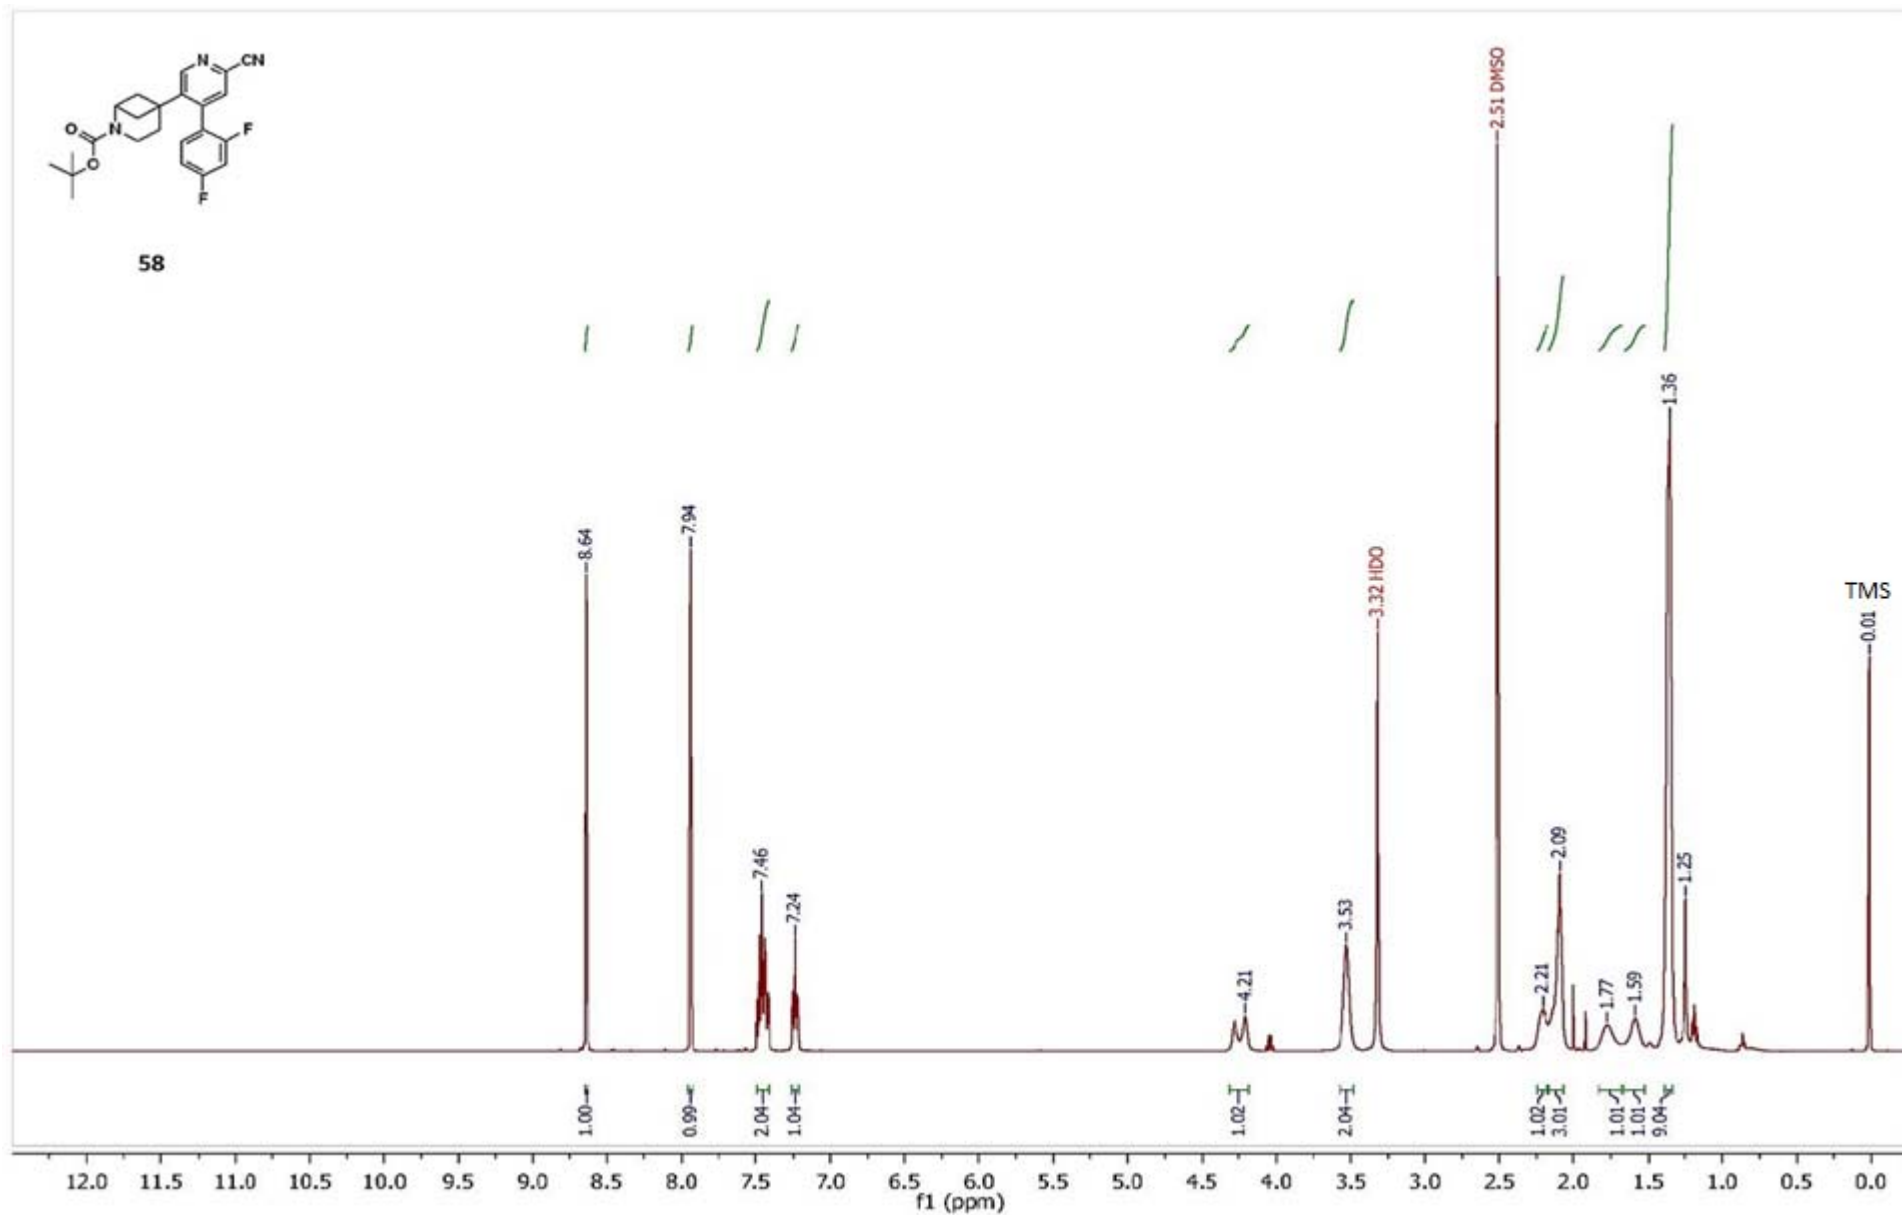

<sup>1</sup>H NMR of compound 58 in DMSO-d<sub>6</sub>

S181

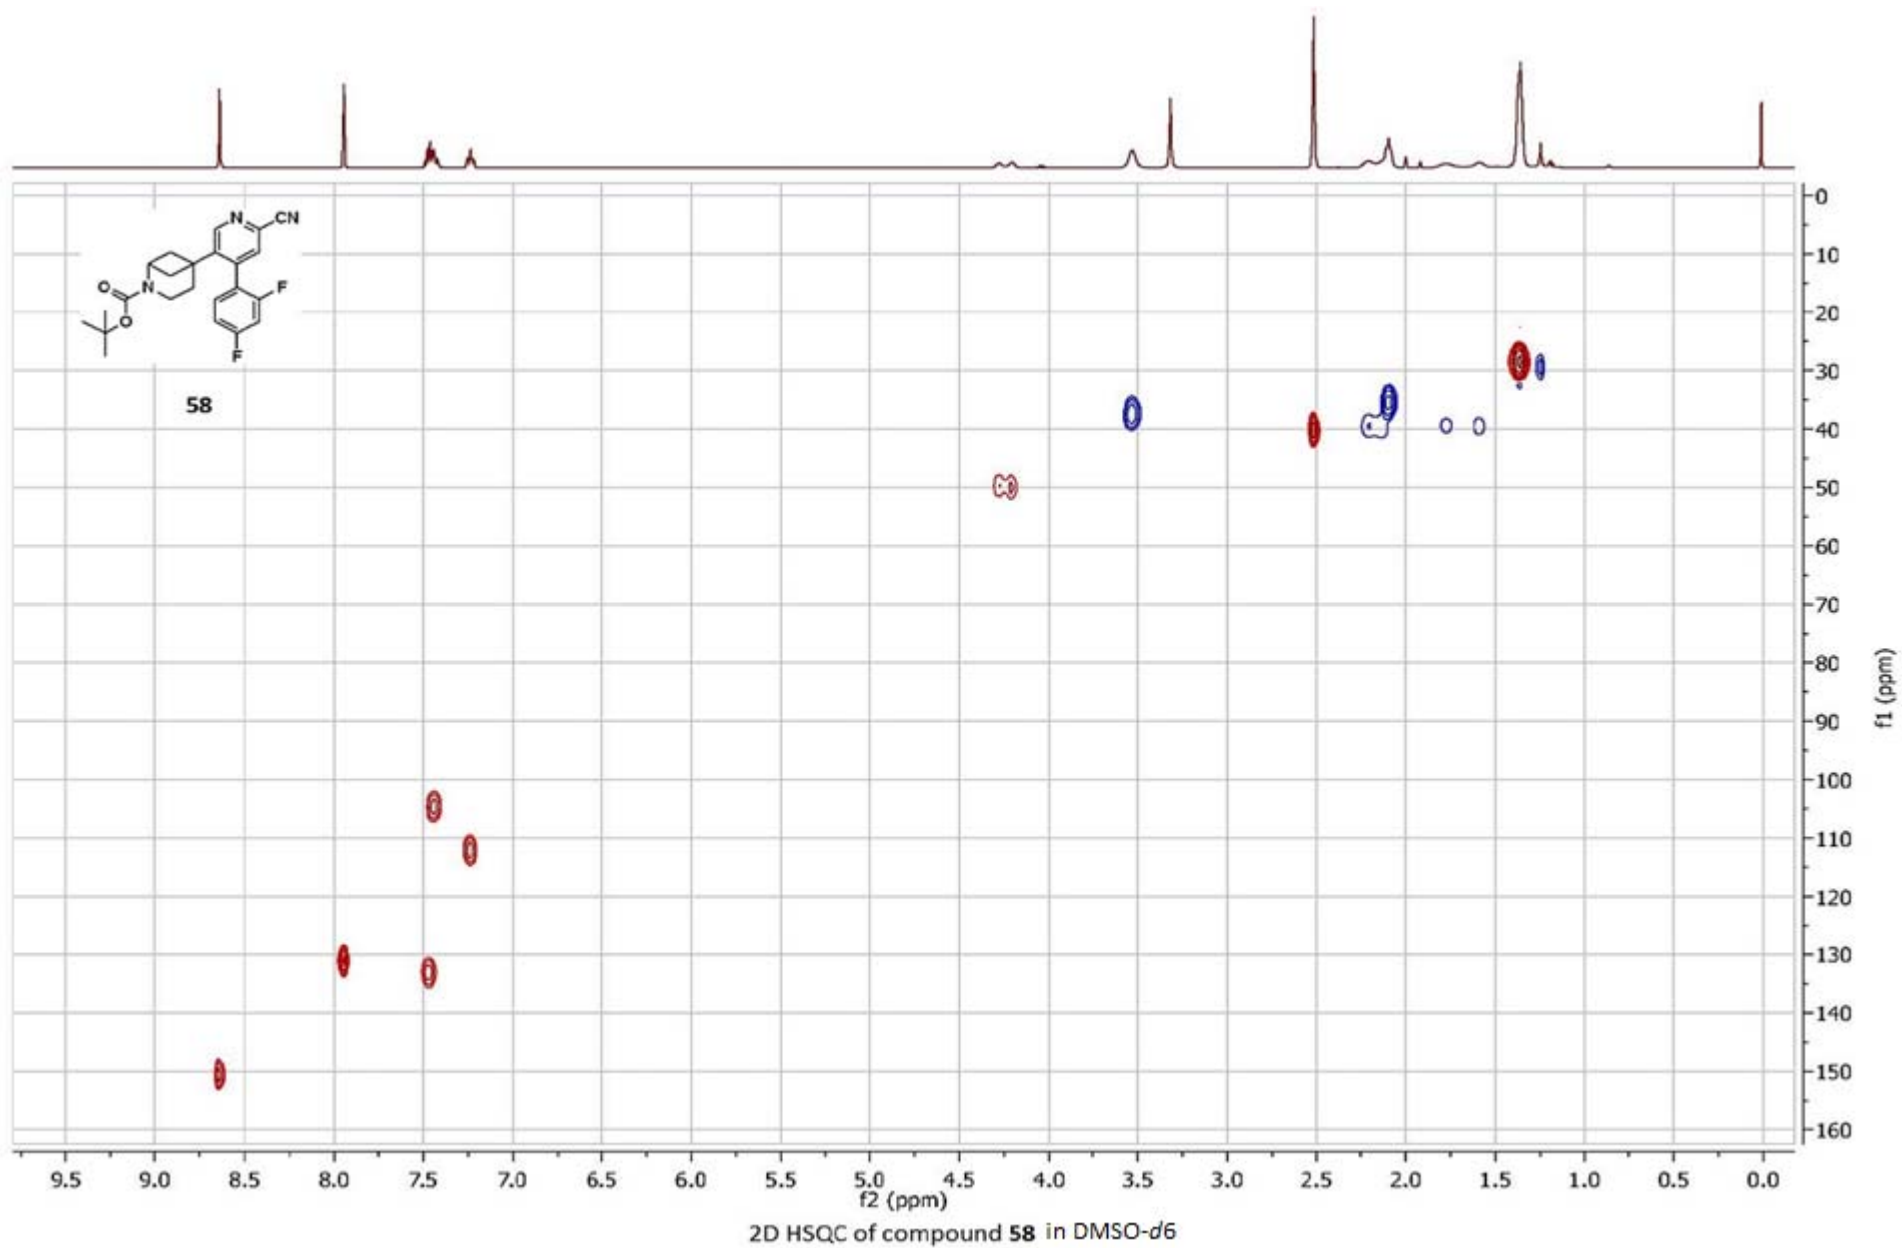

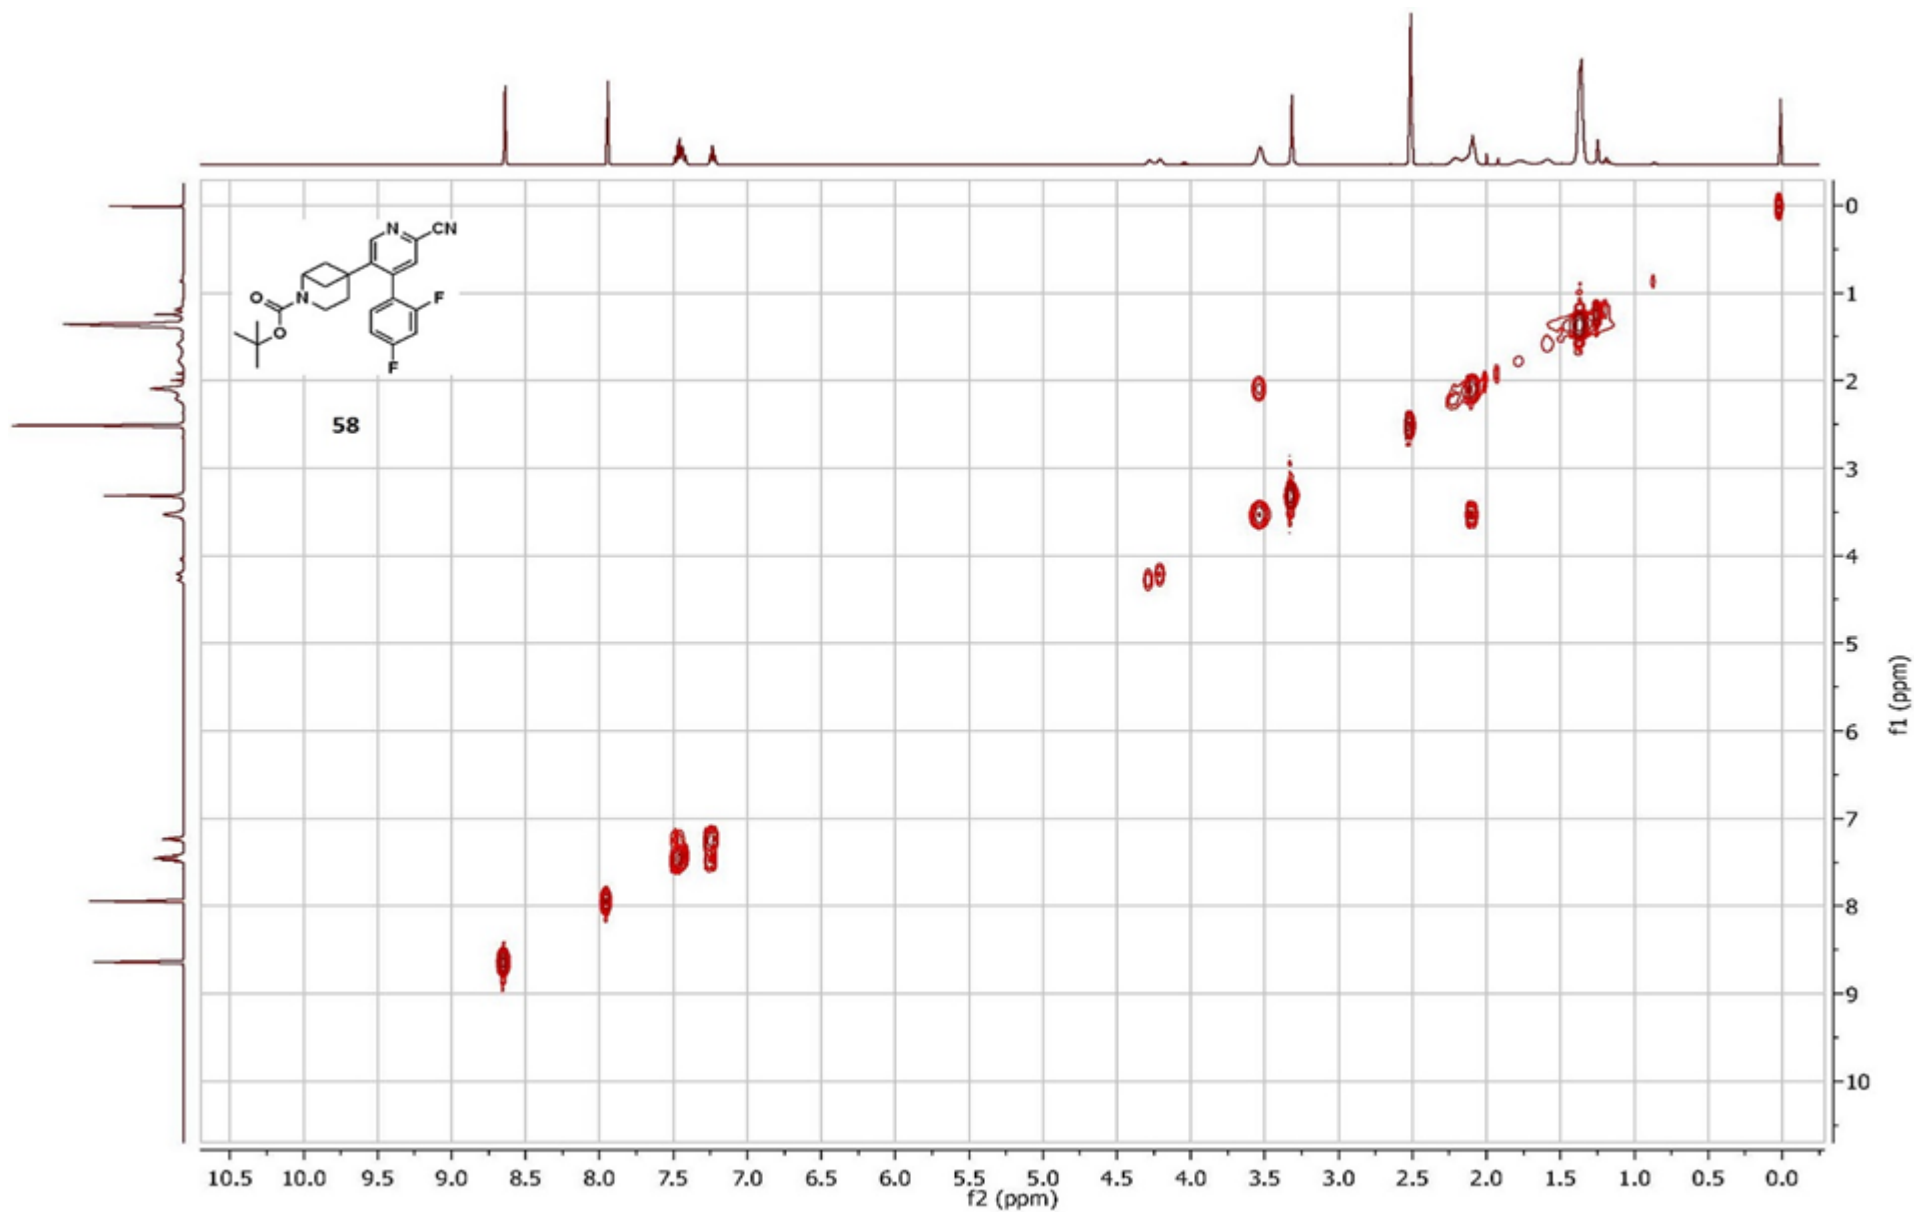

2D COSY of compound 58 in DMSO-d6

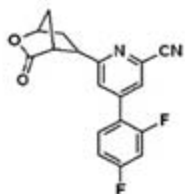

59

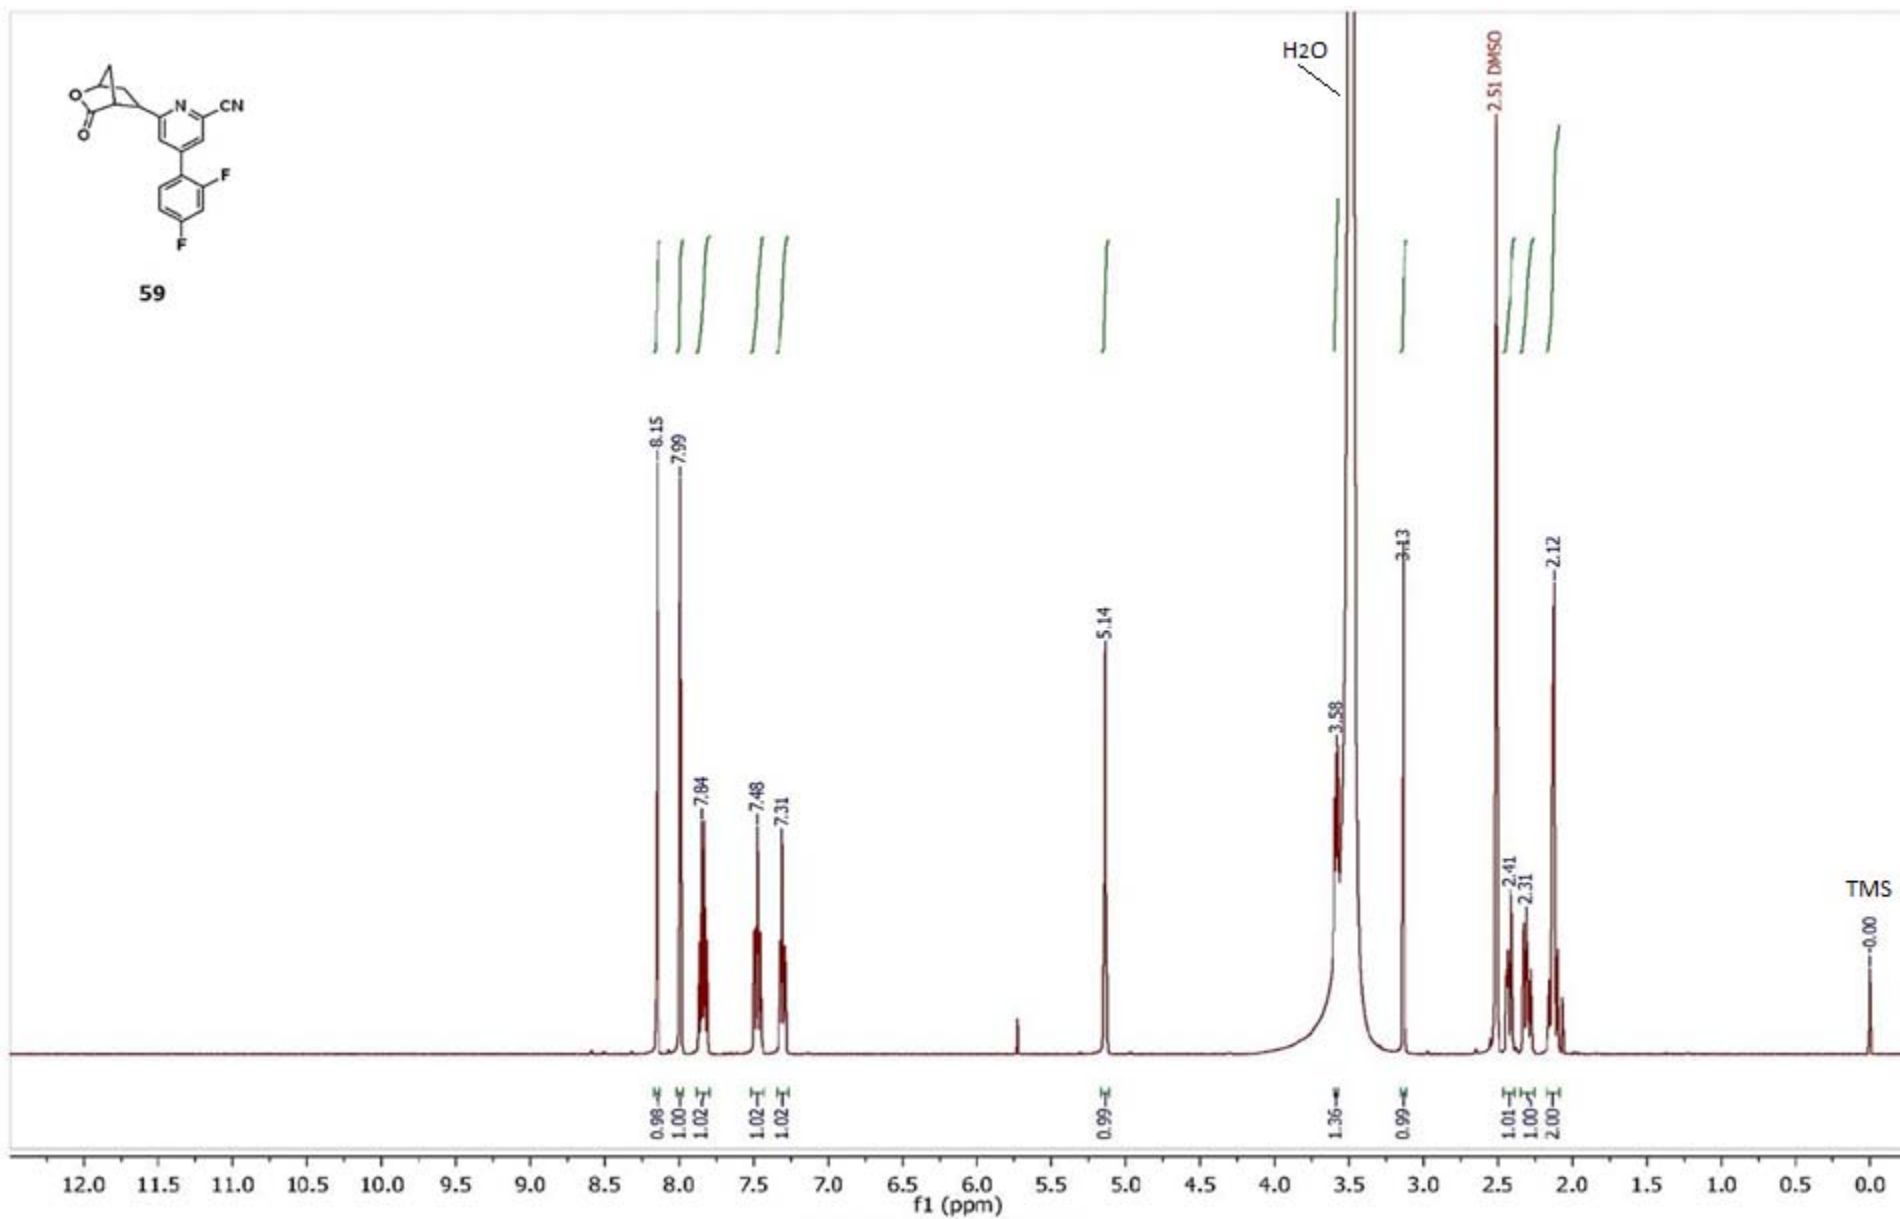

S184



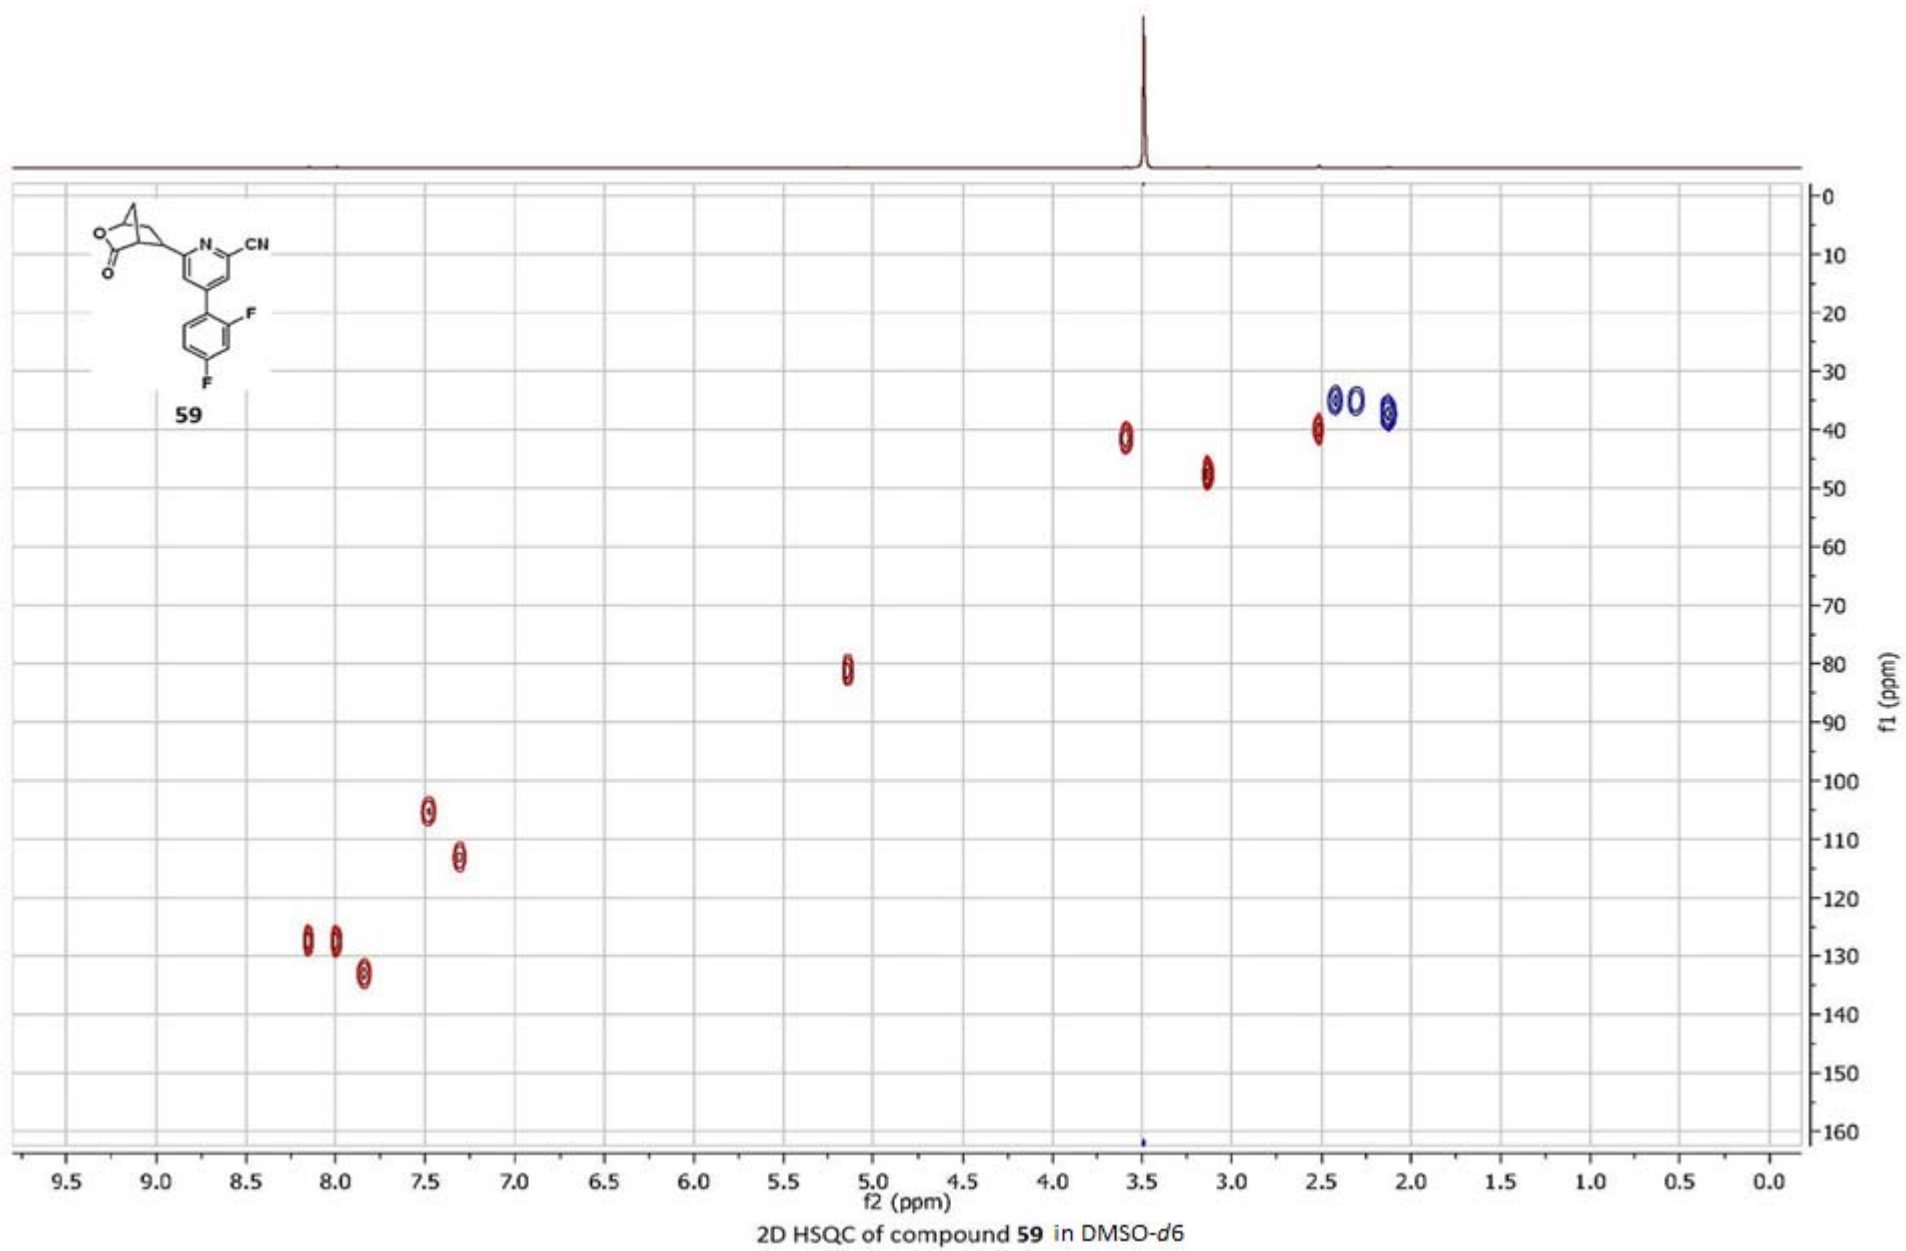

S185

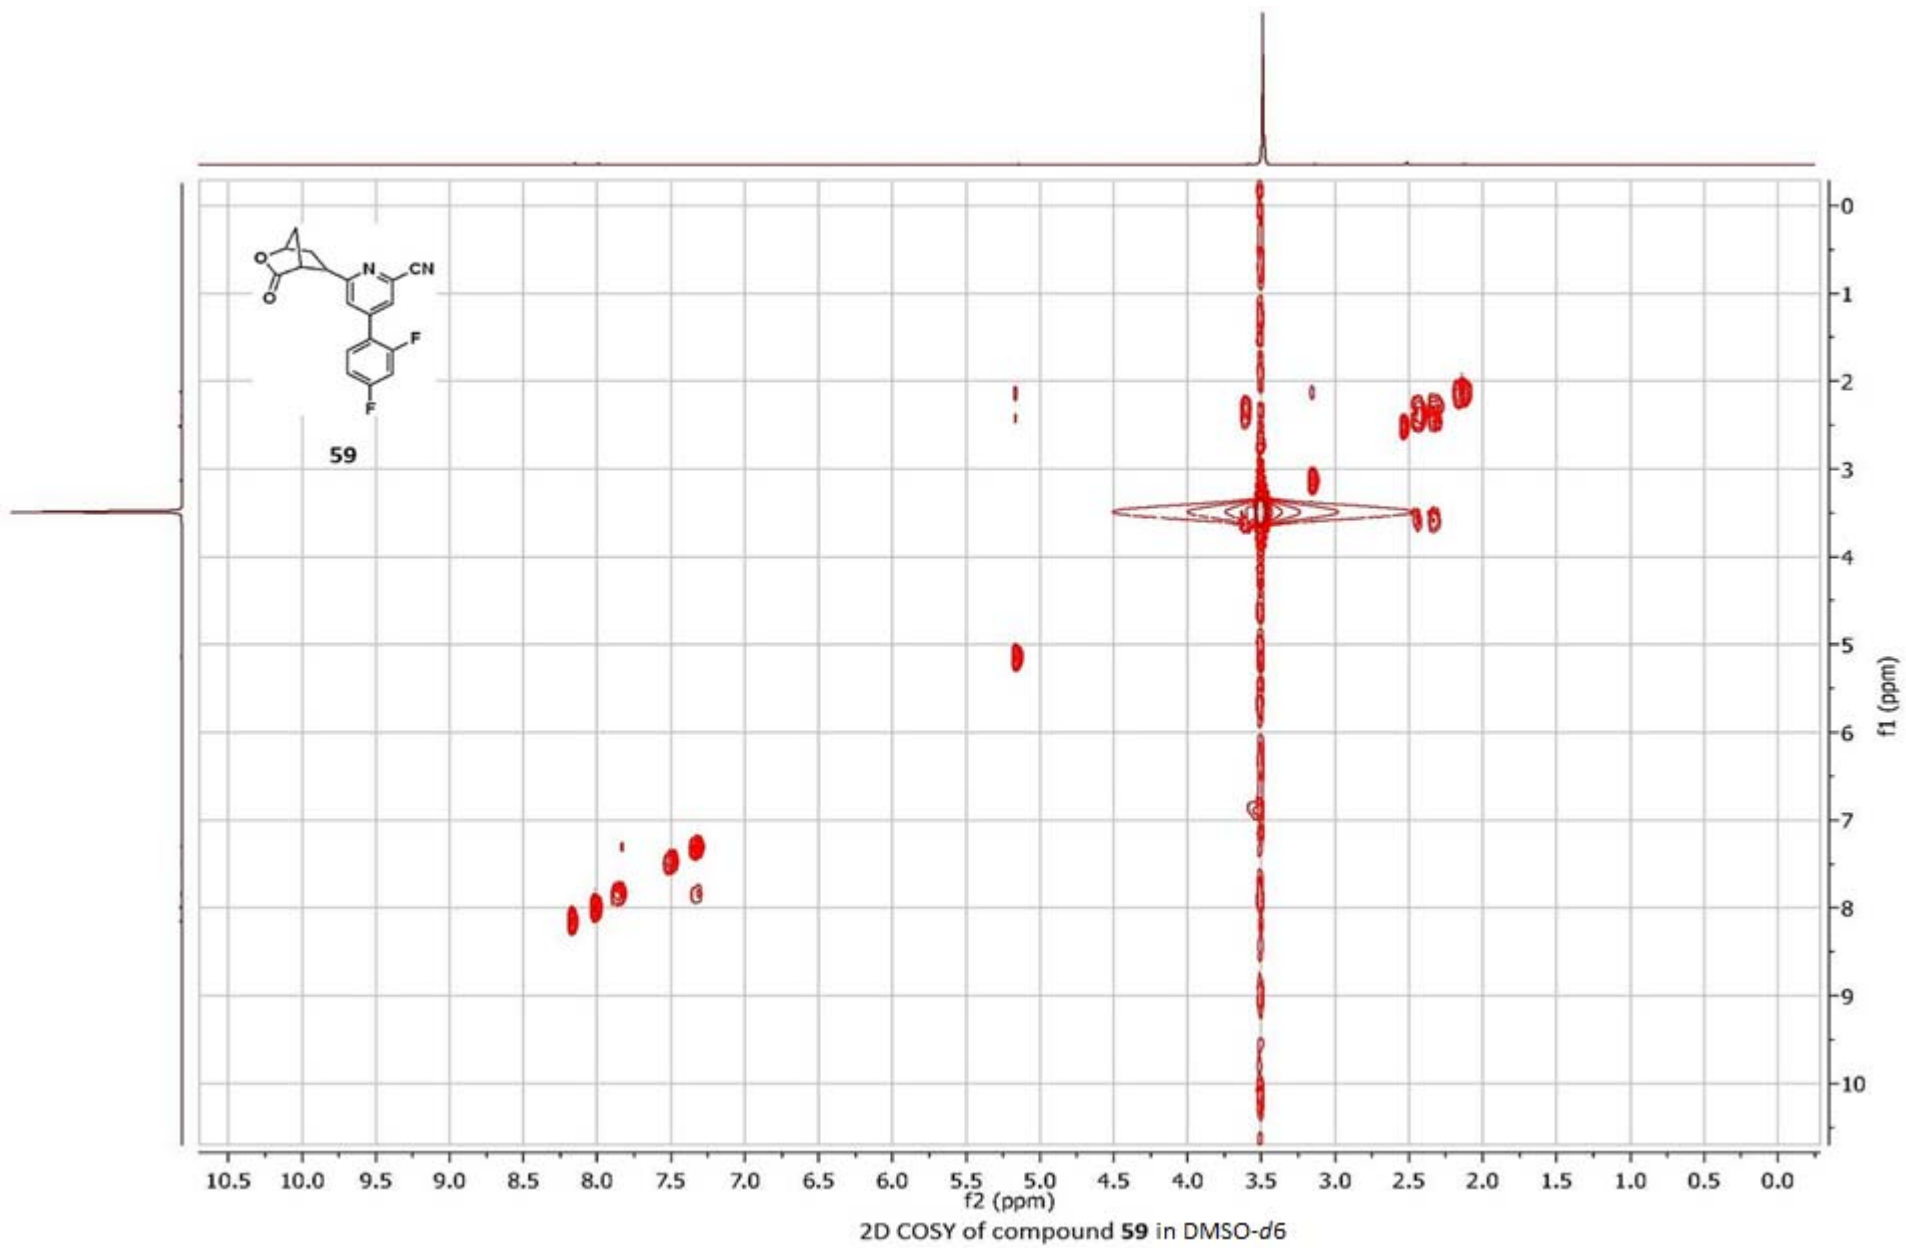

S186

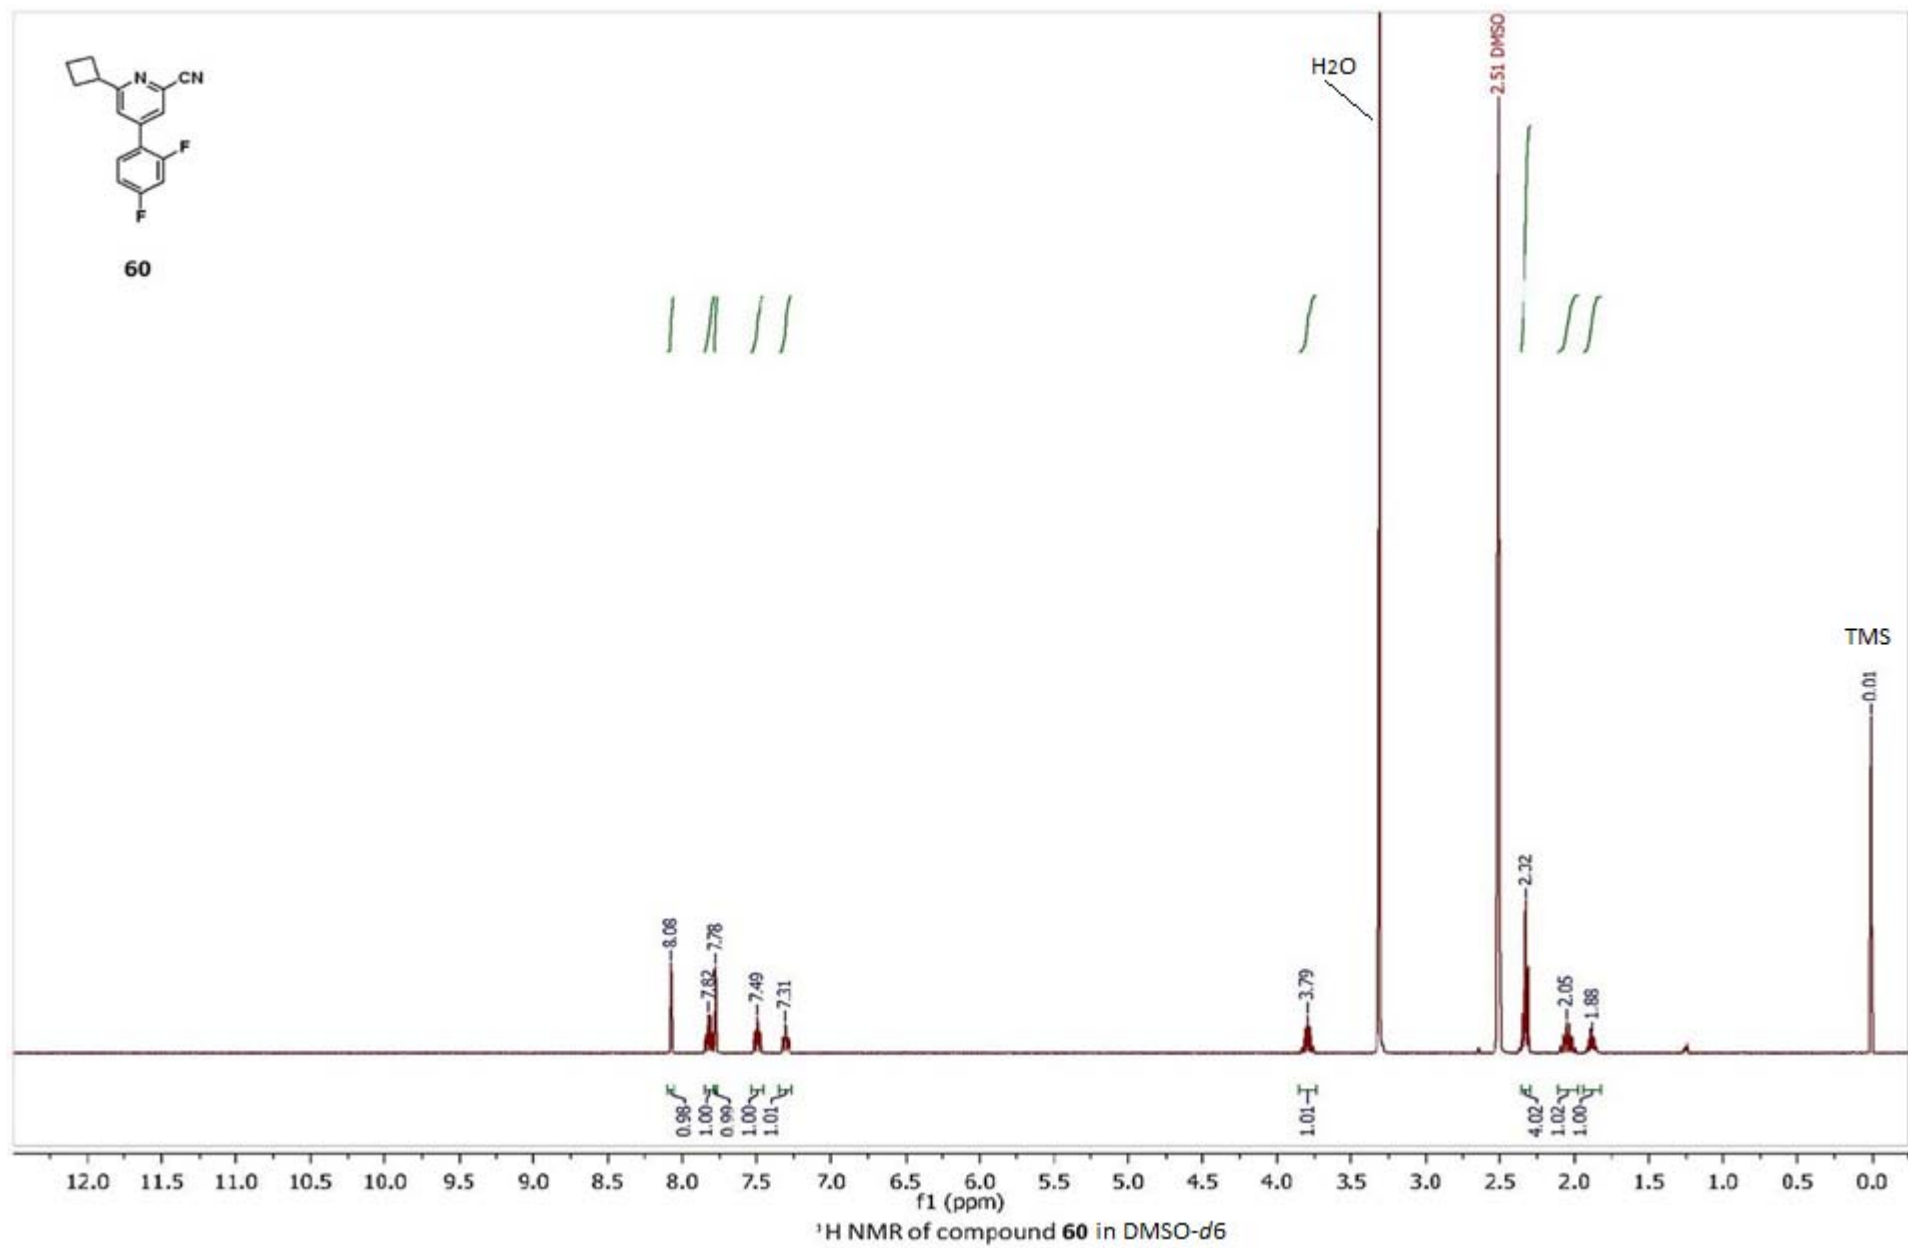

S187

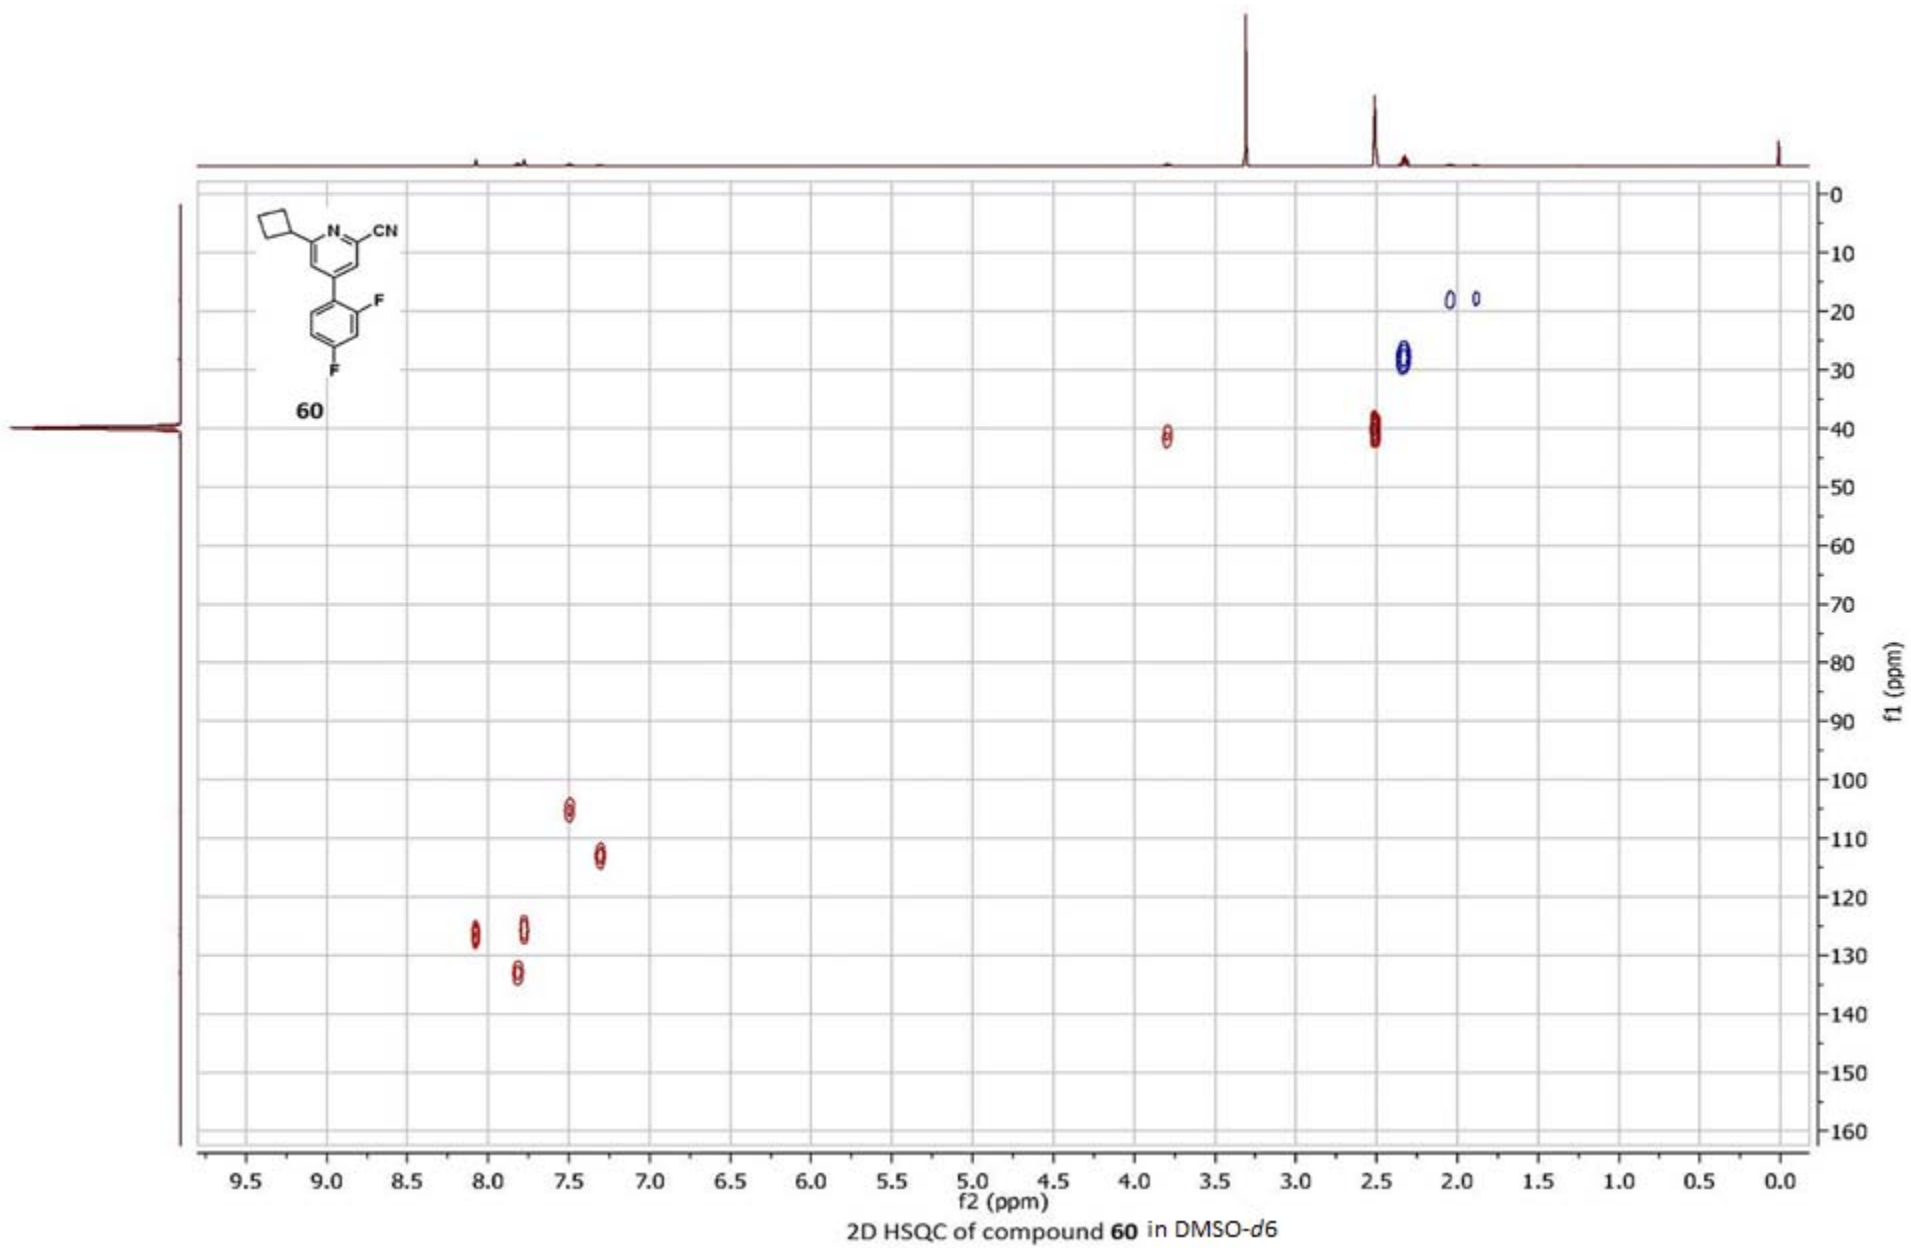

S188

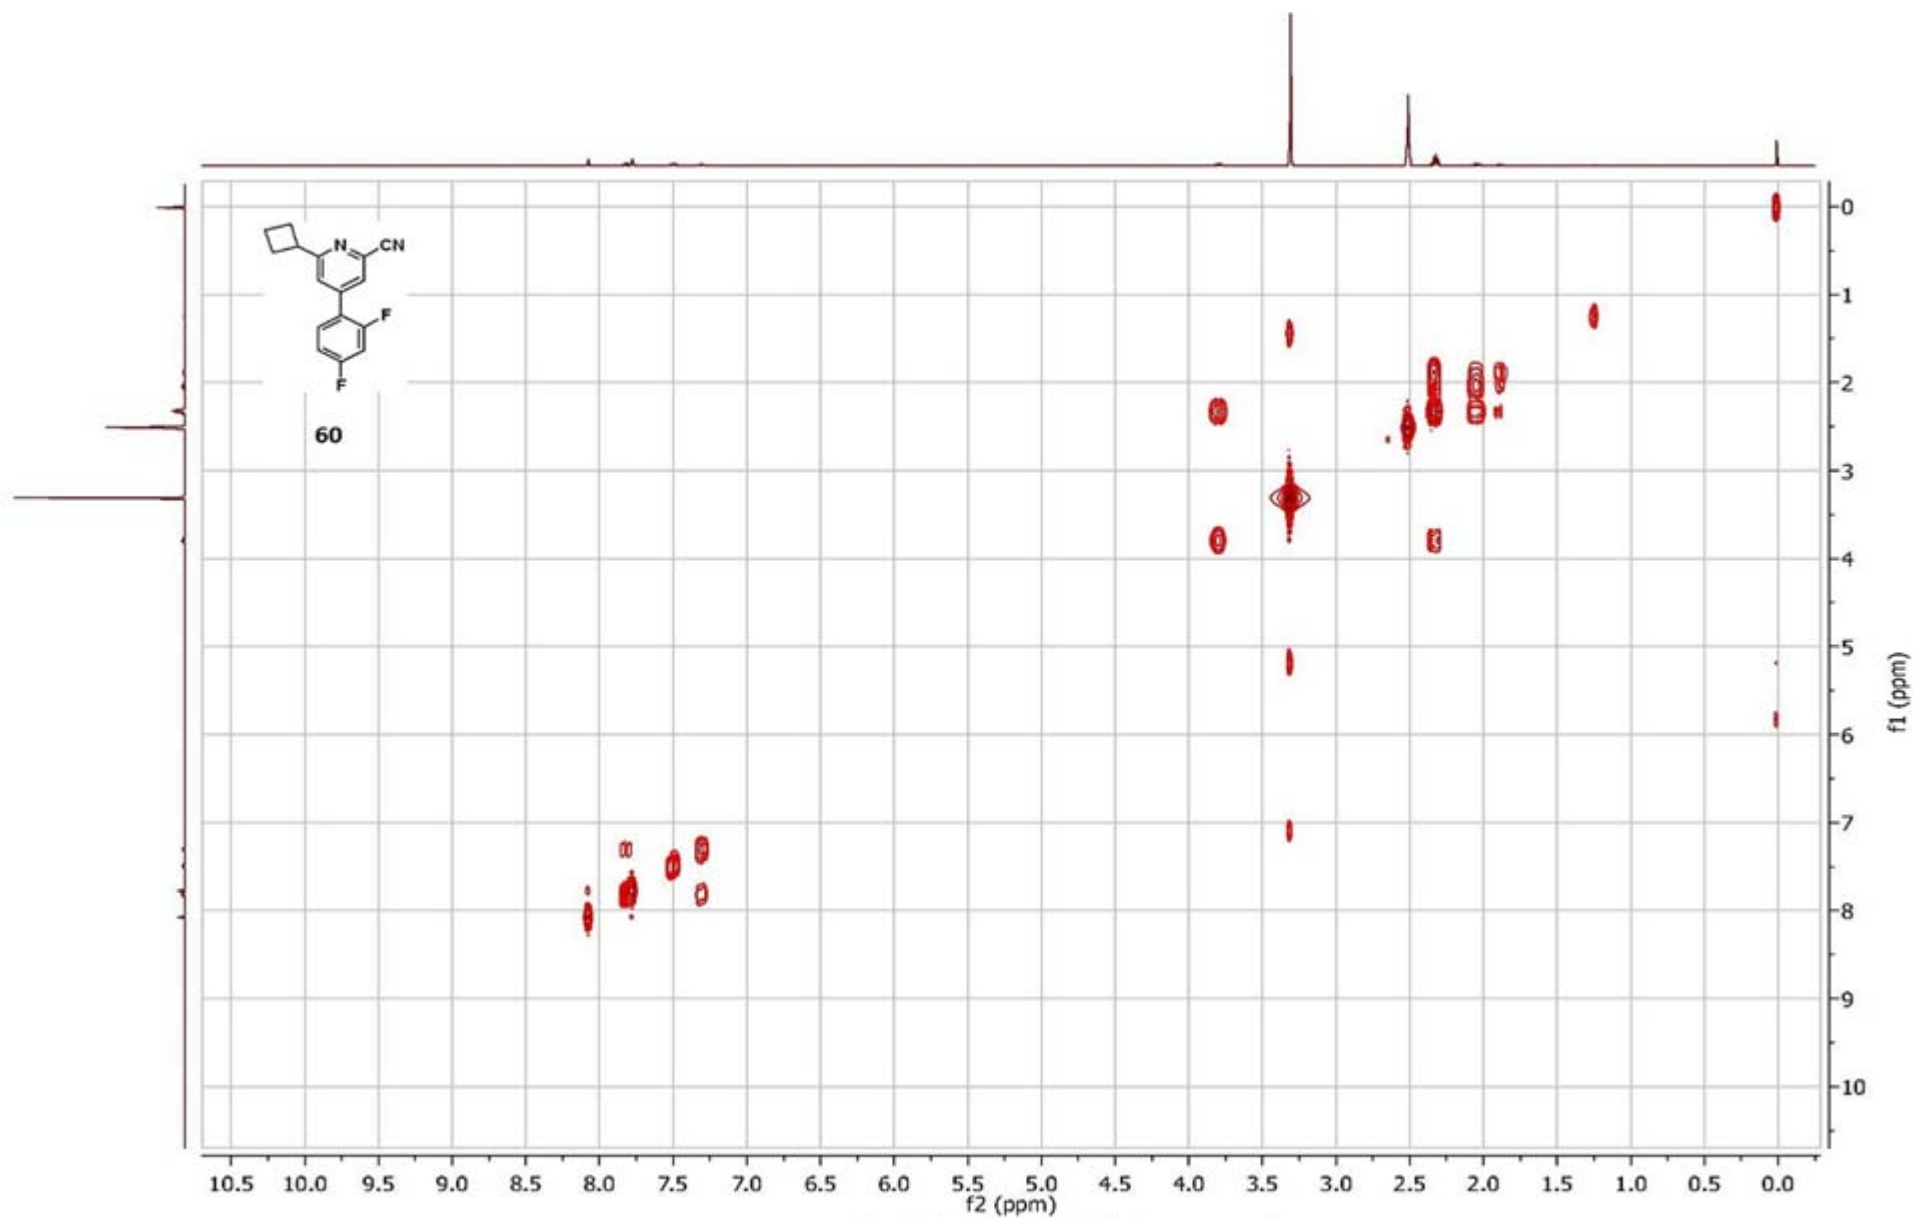

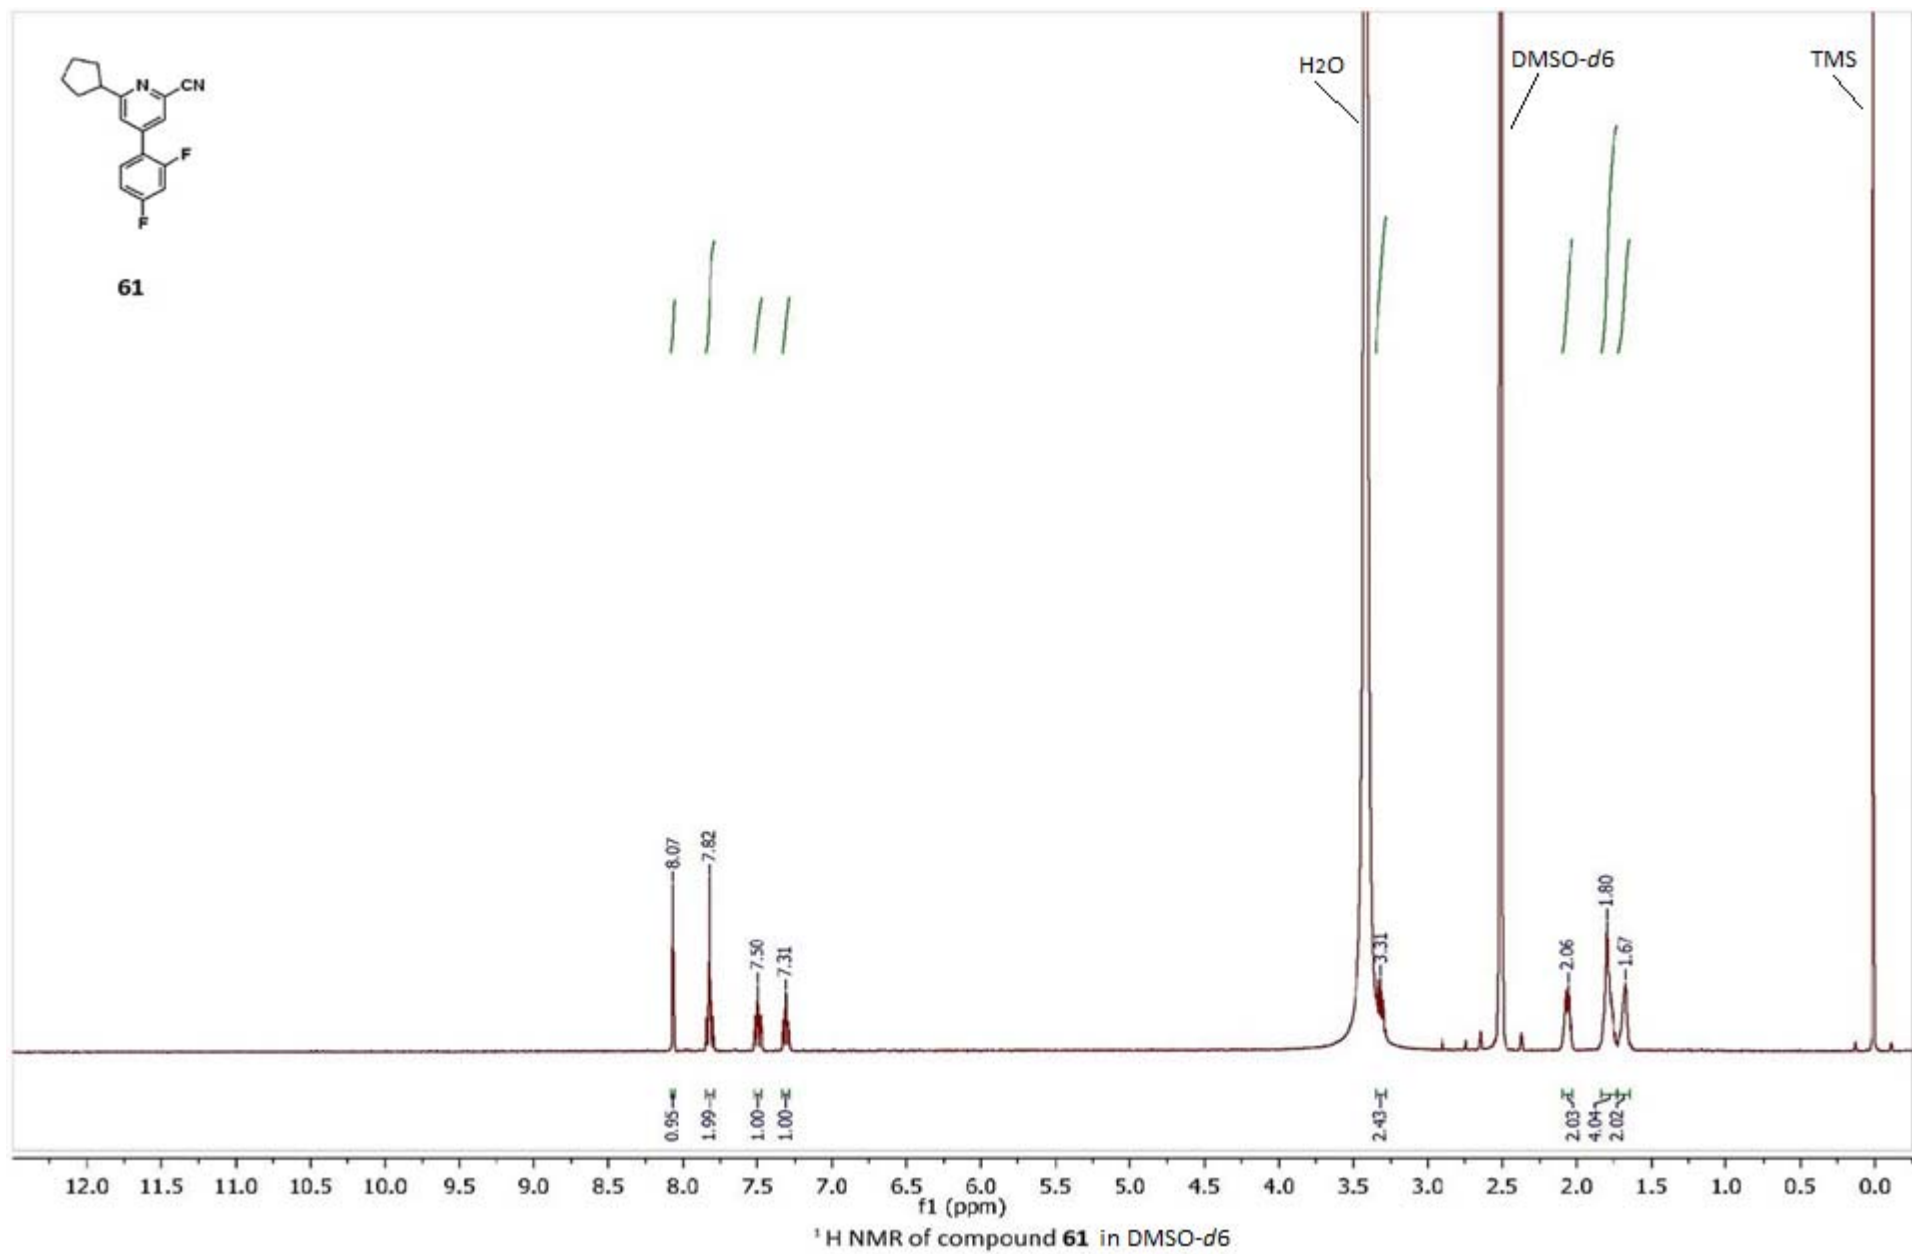

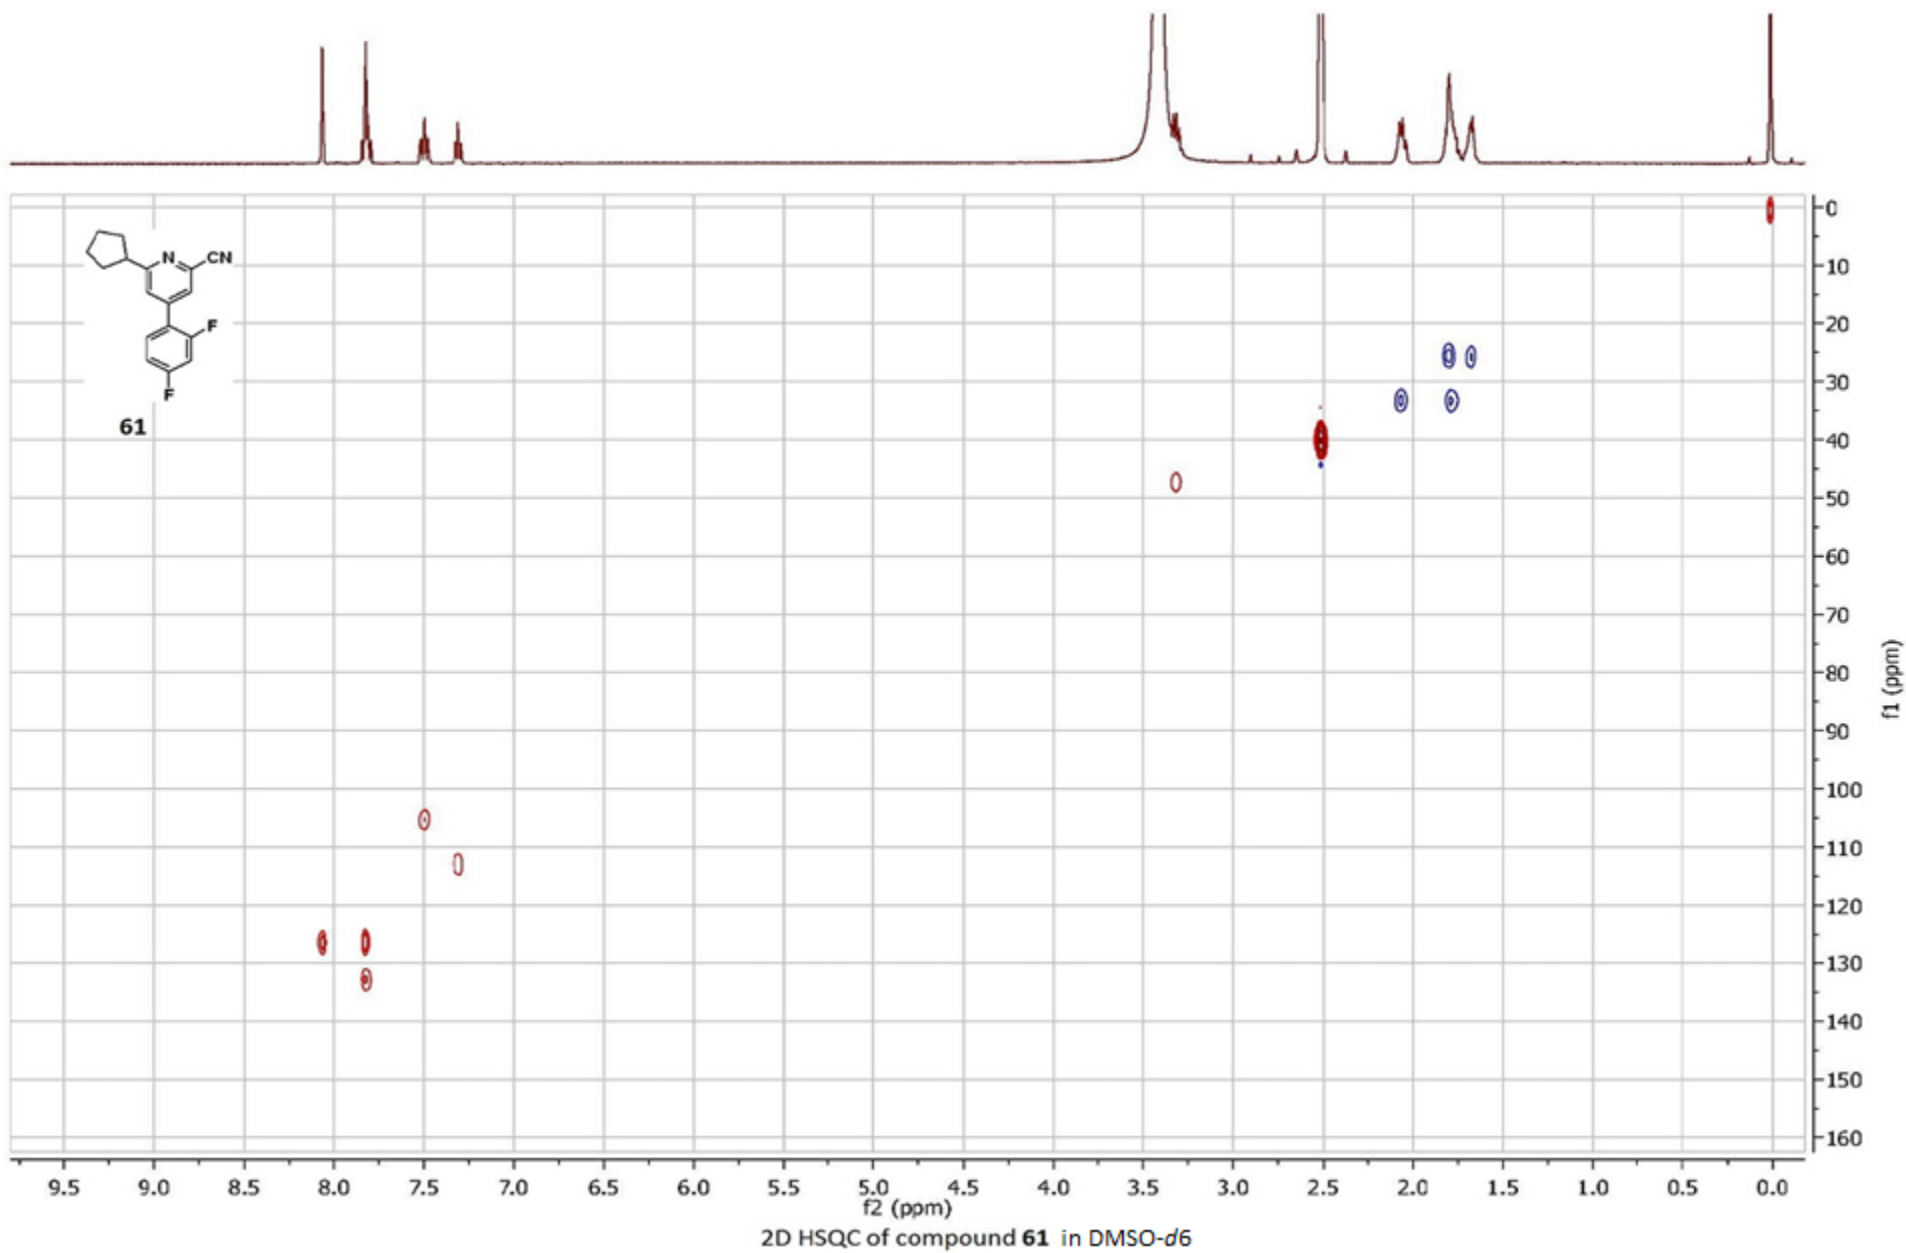

S191

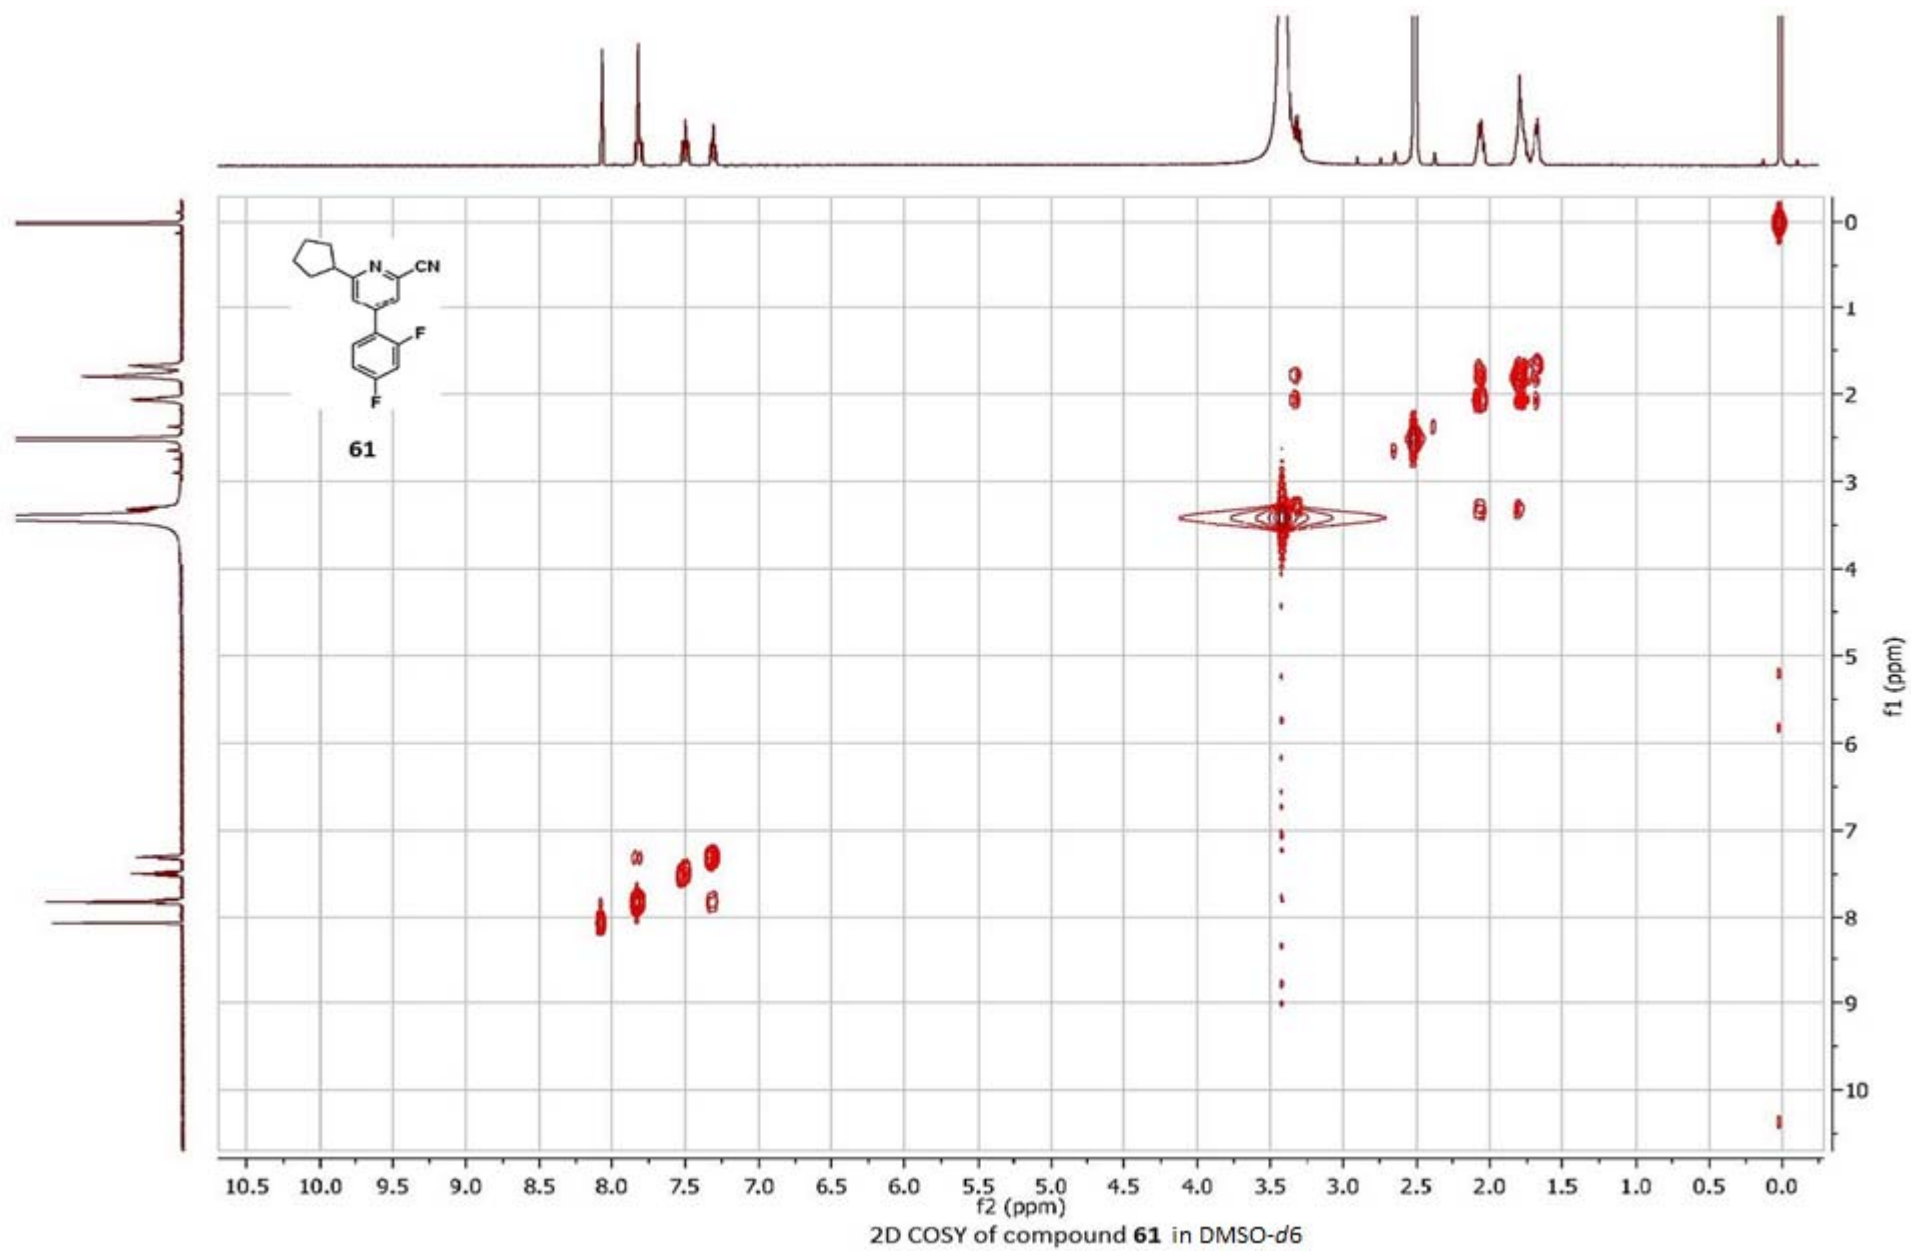



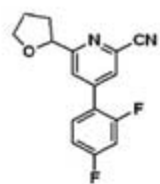

62

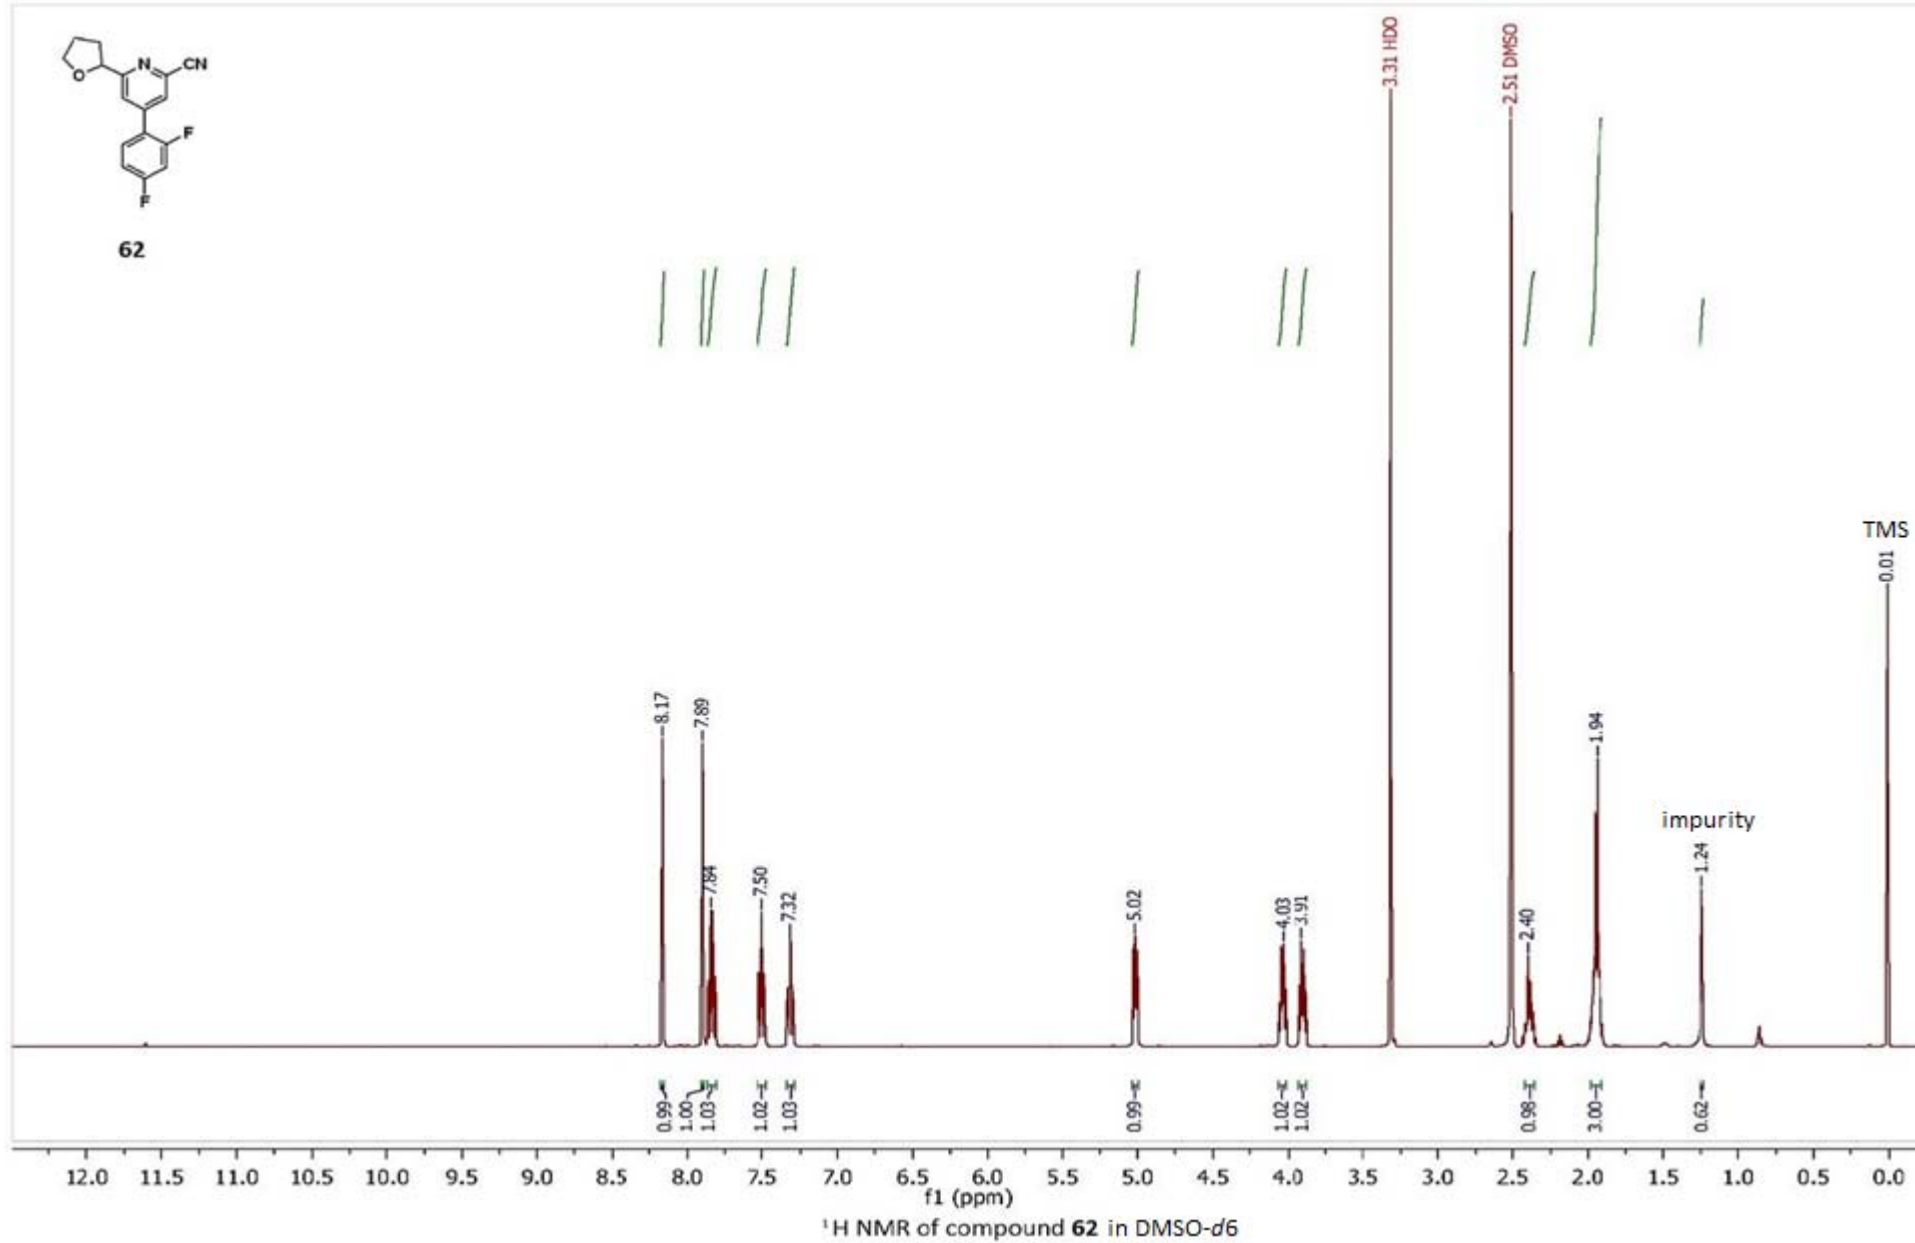

S193

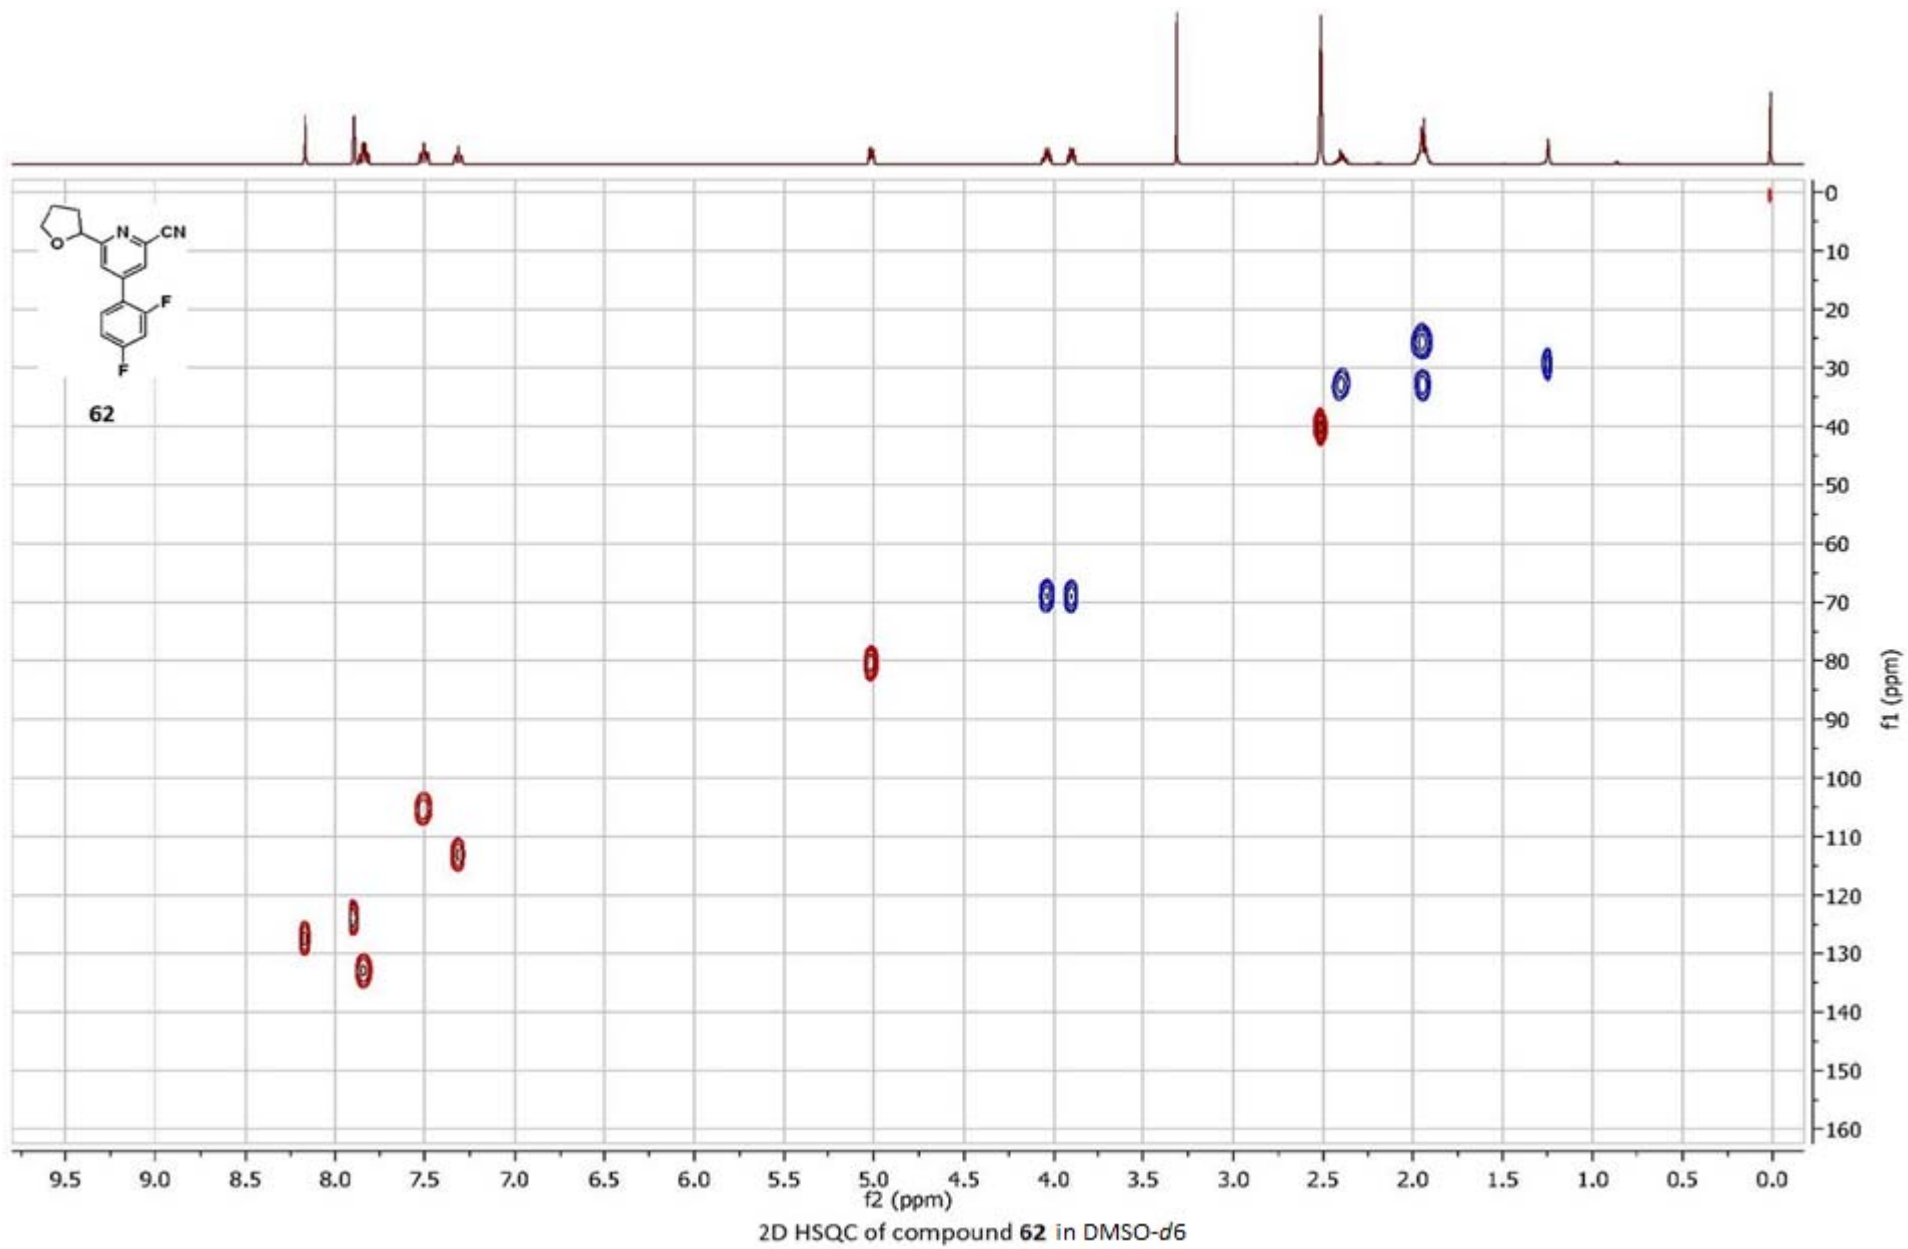

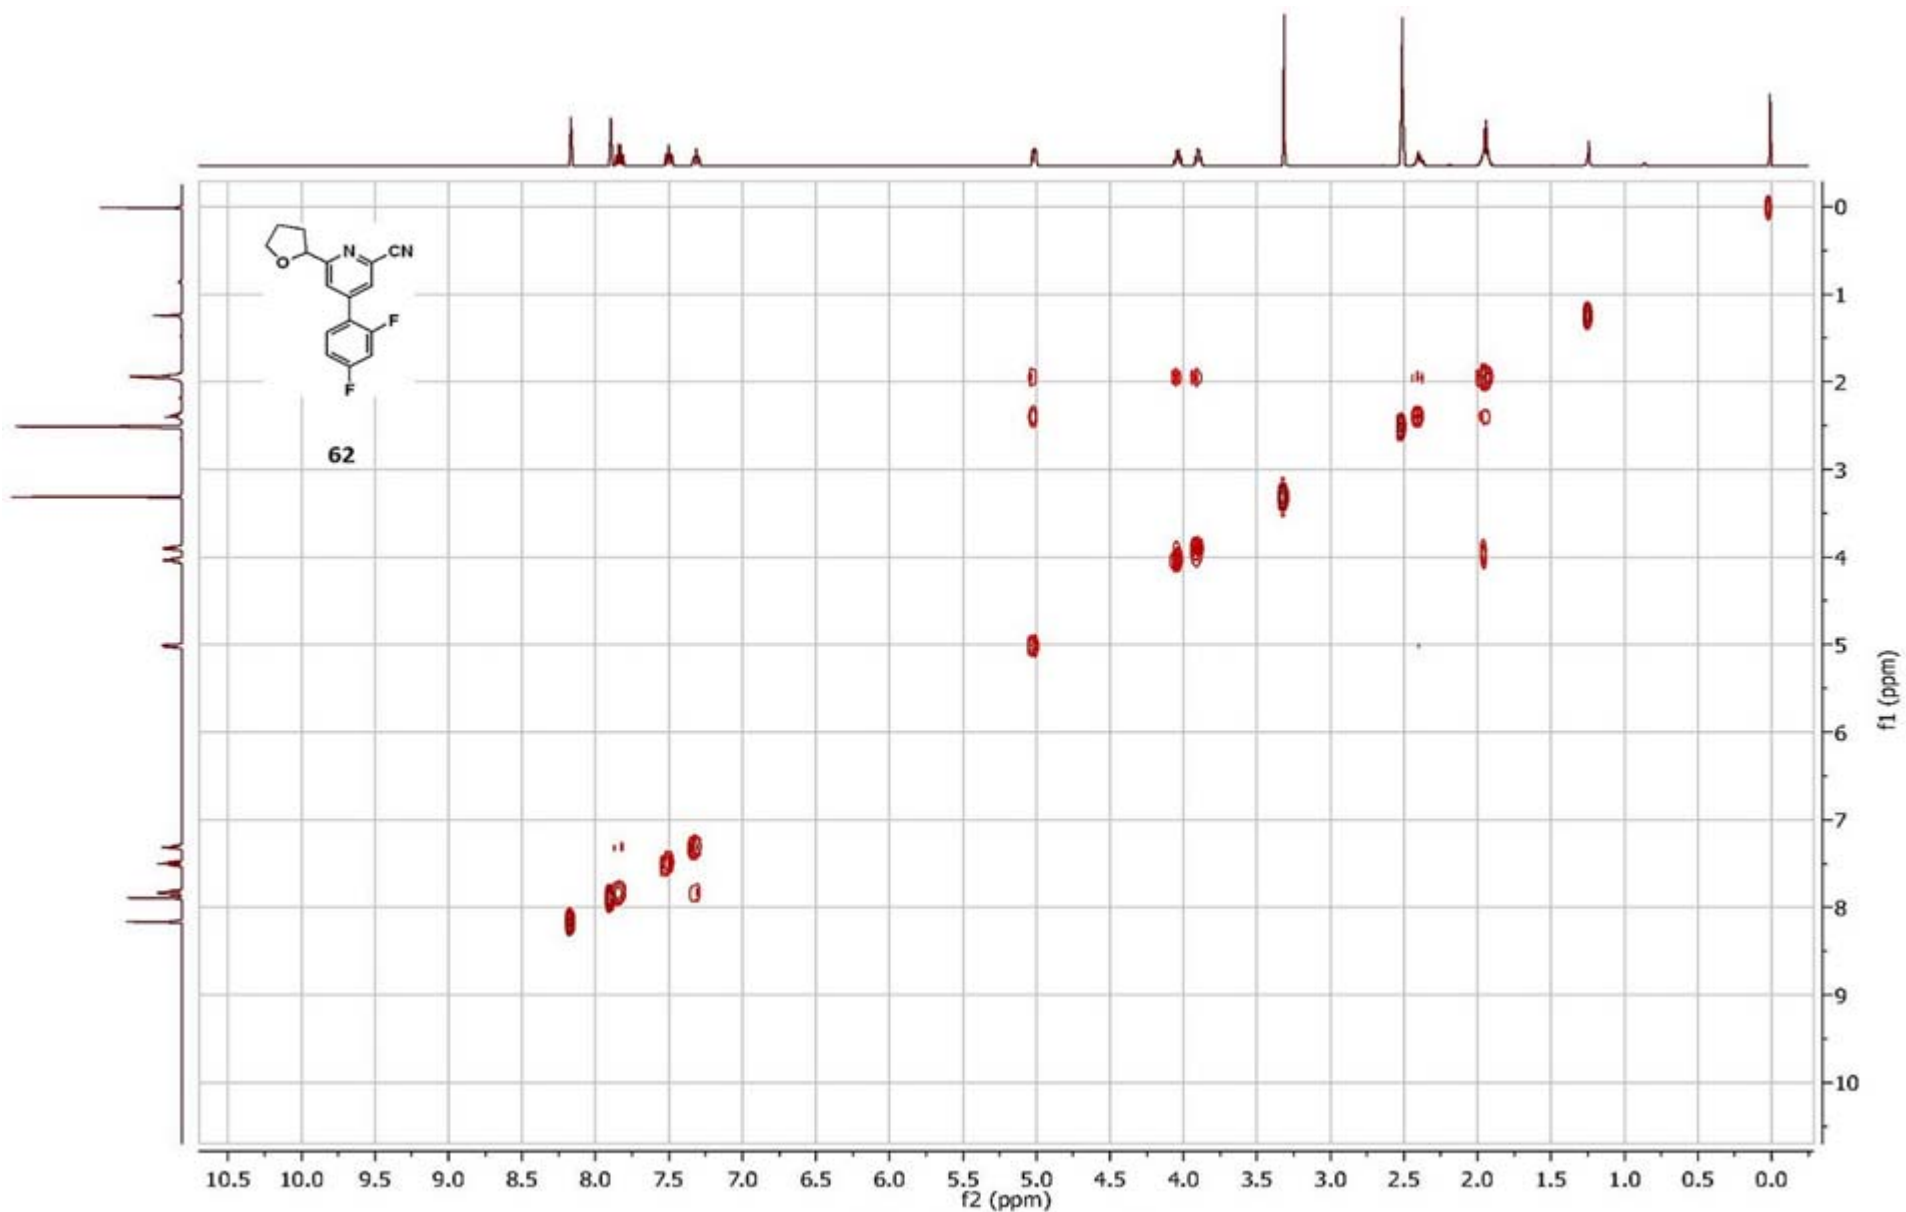

2D COSY of compound **62** in DMSO-*d*<sub>6</sub>

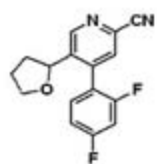

63

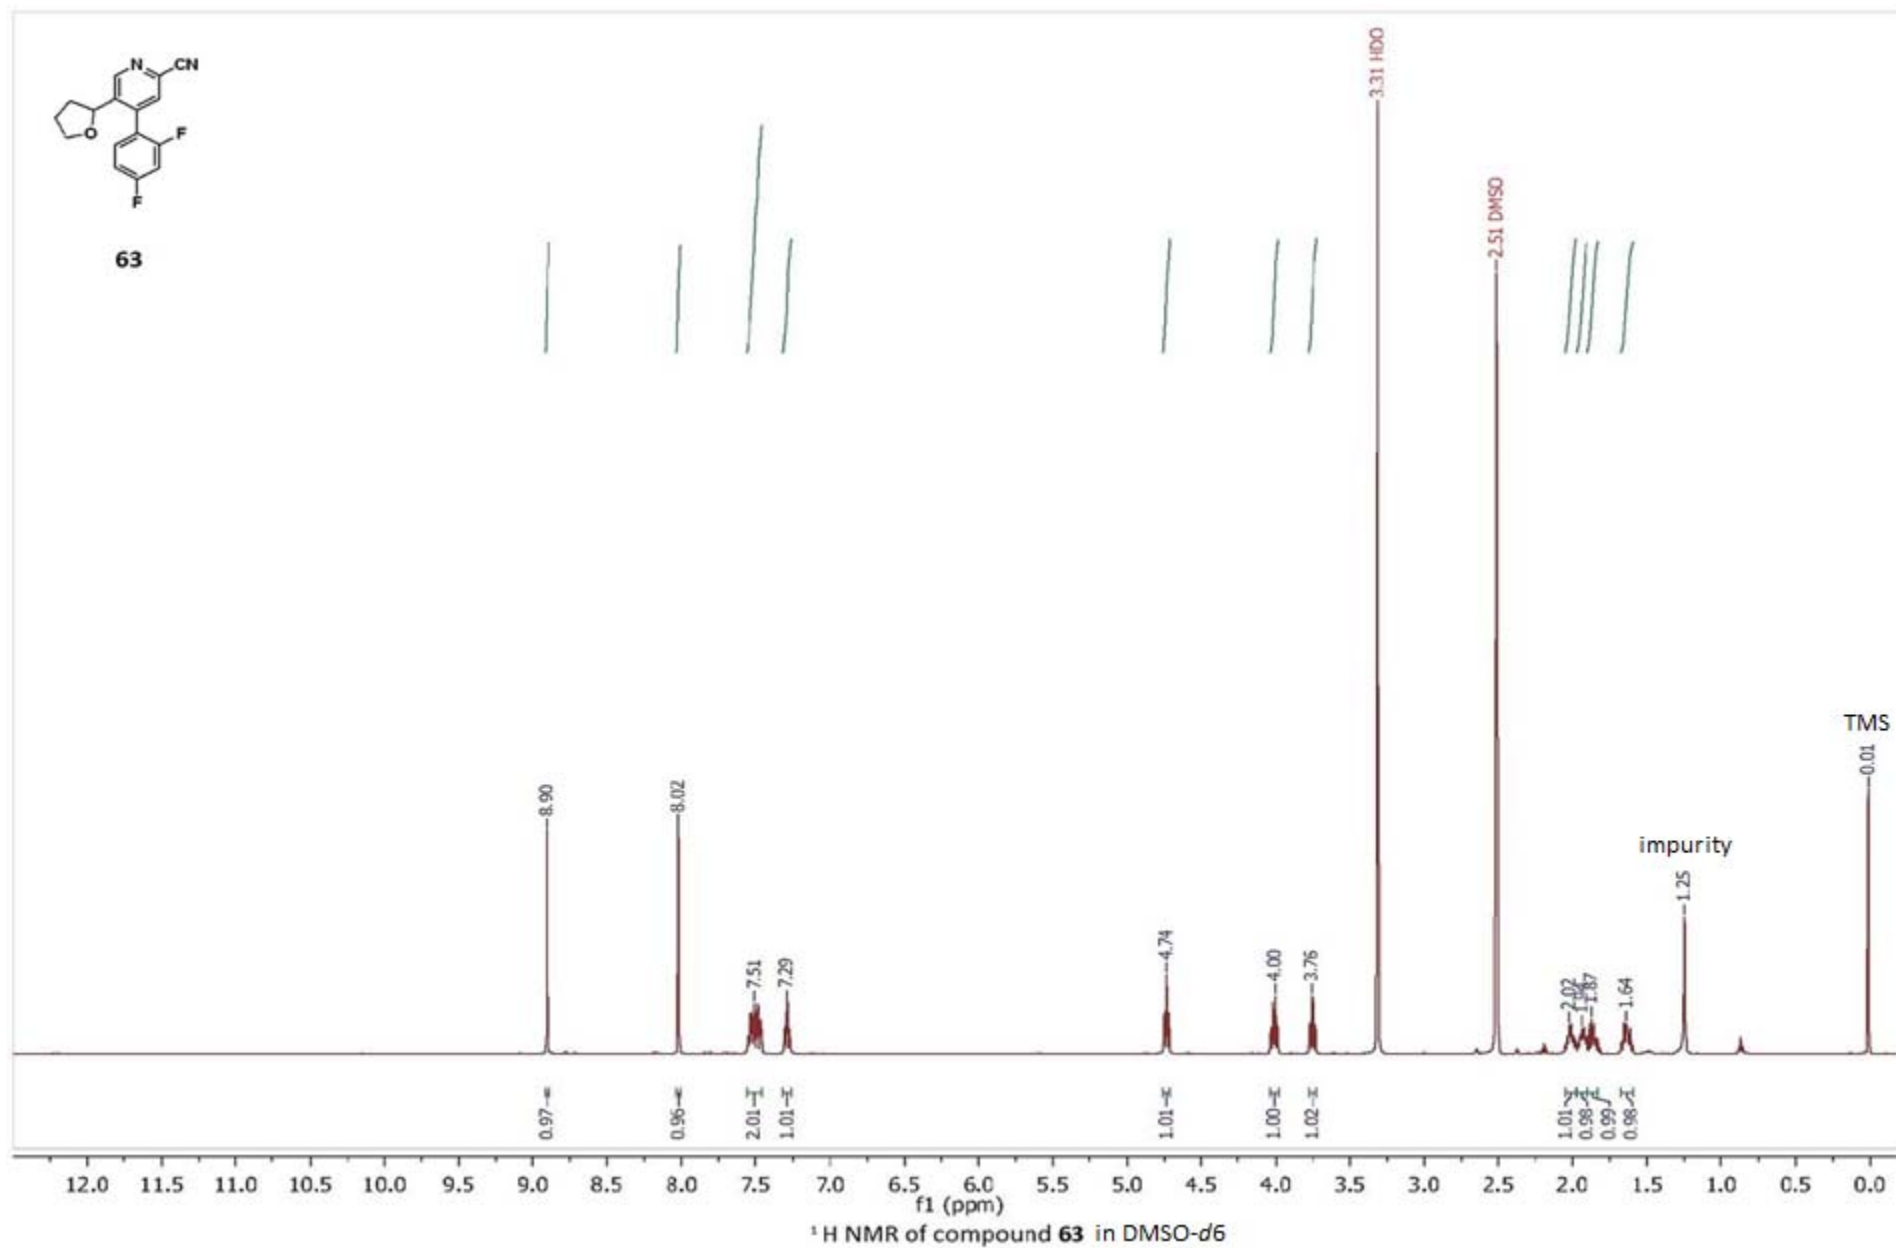

S196

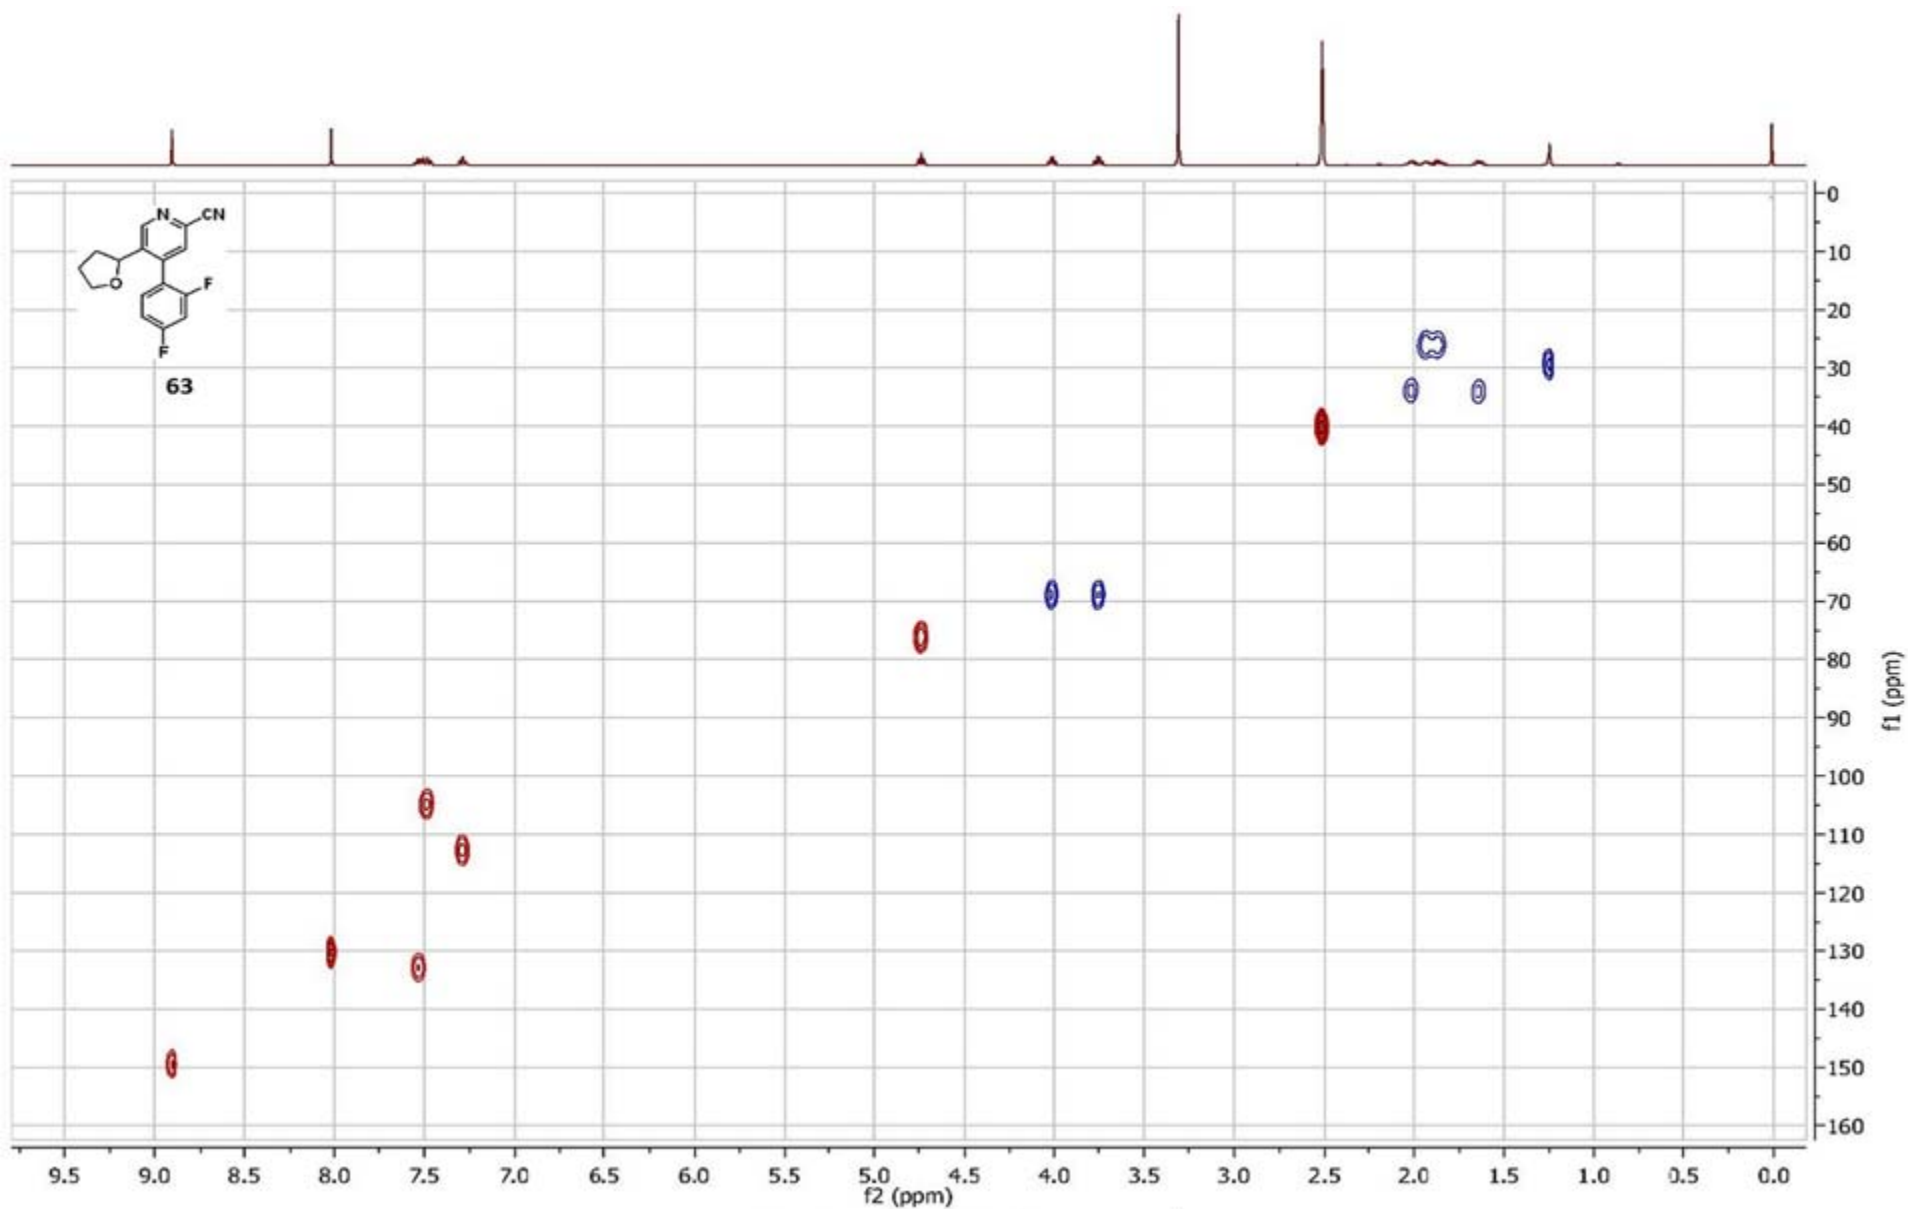

2D HSQC of compound **63** in DMSO-*d*<sub>6</sub>

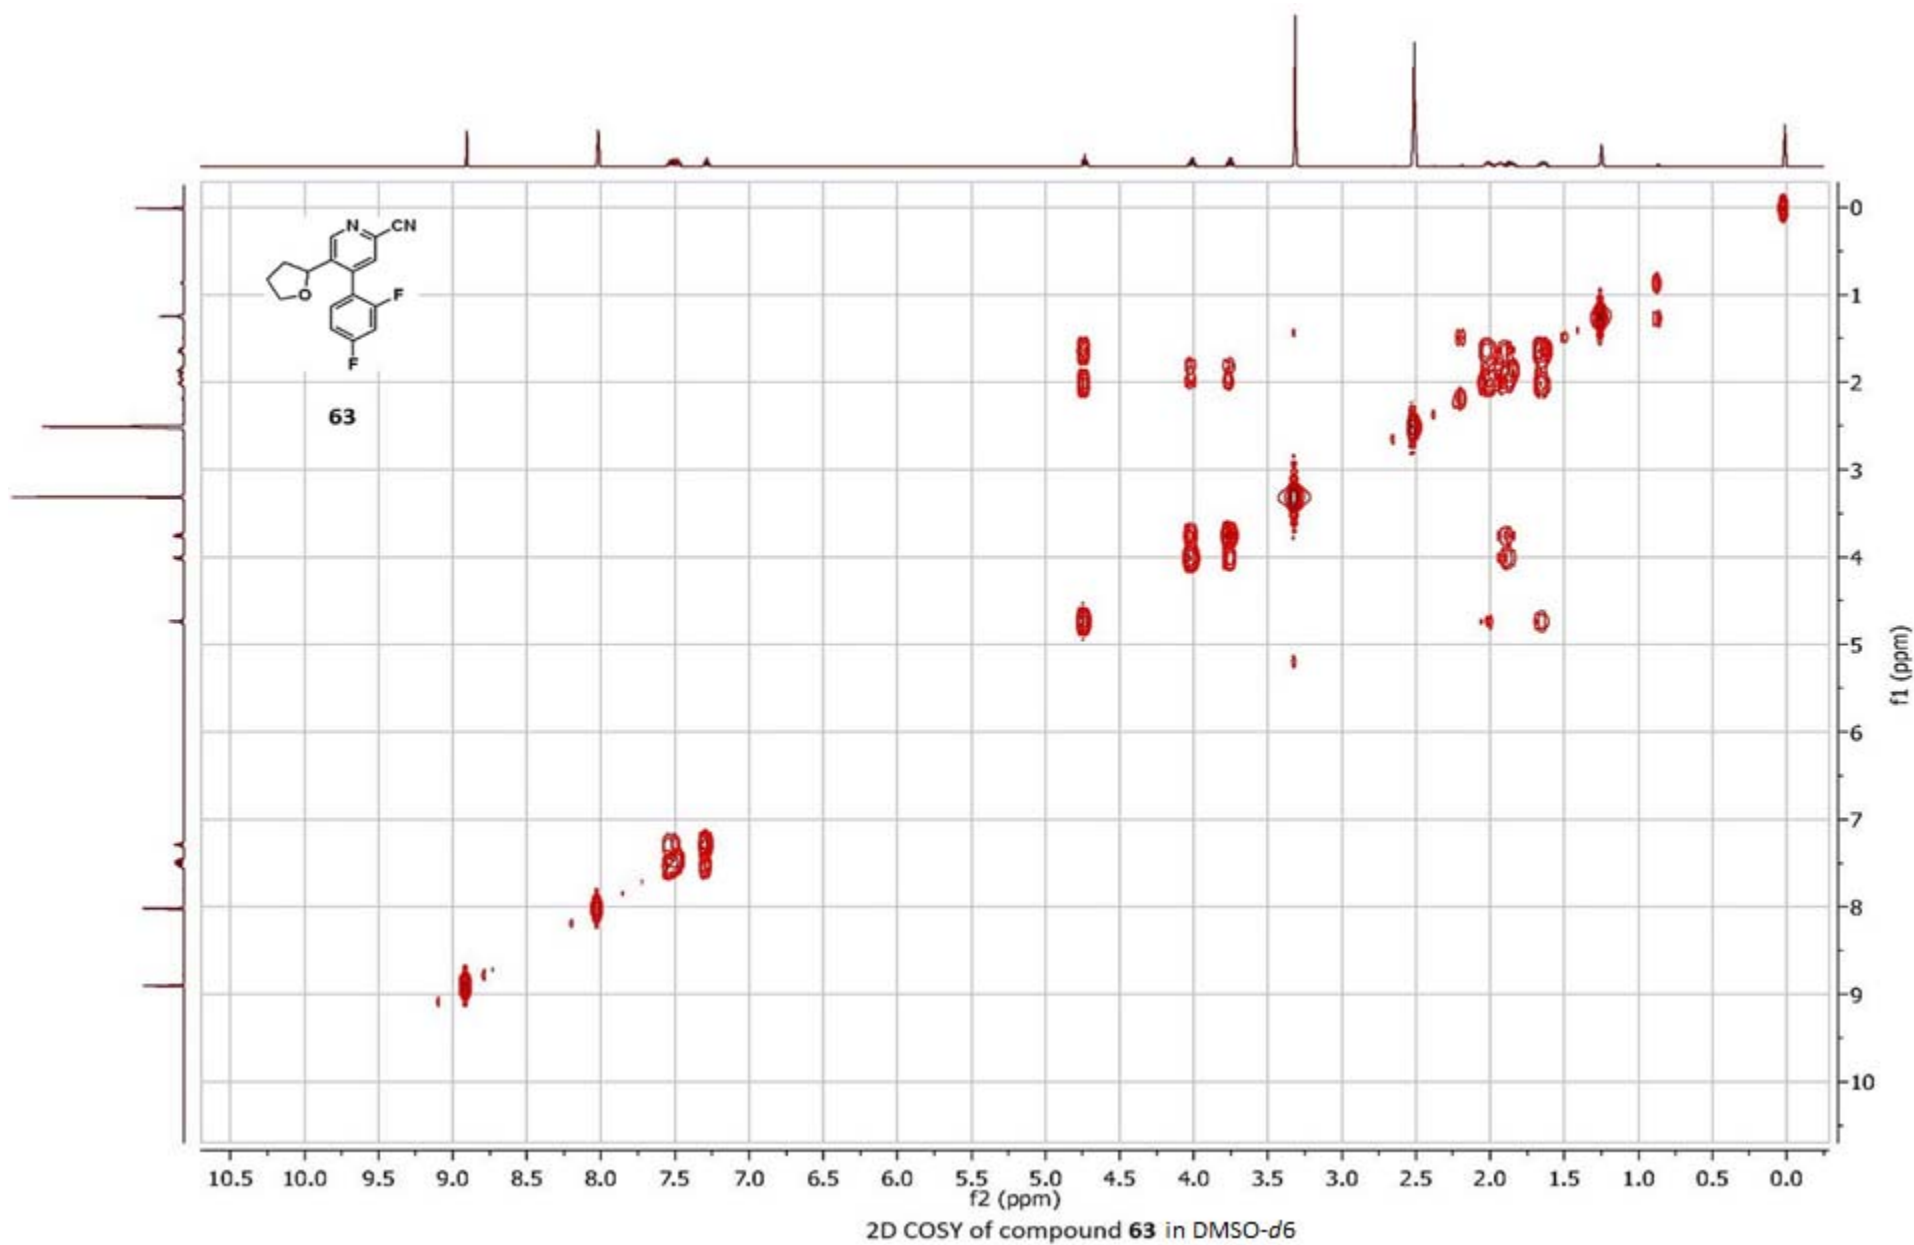

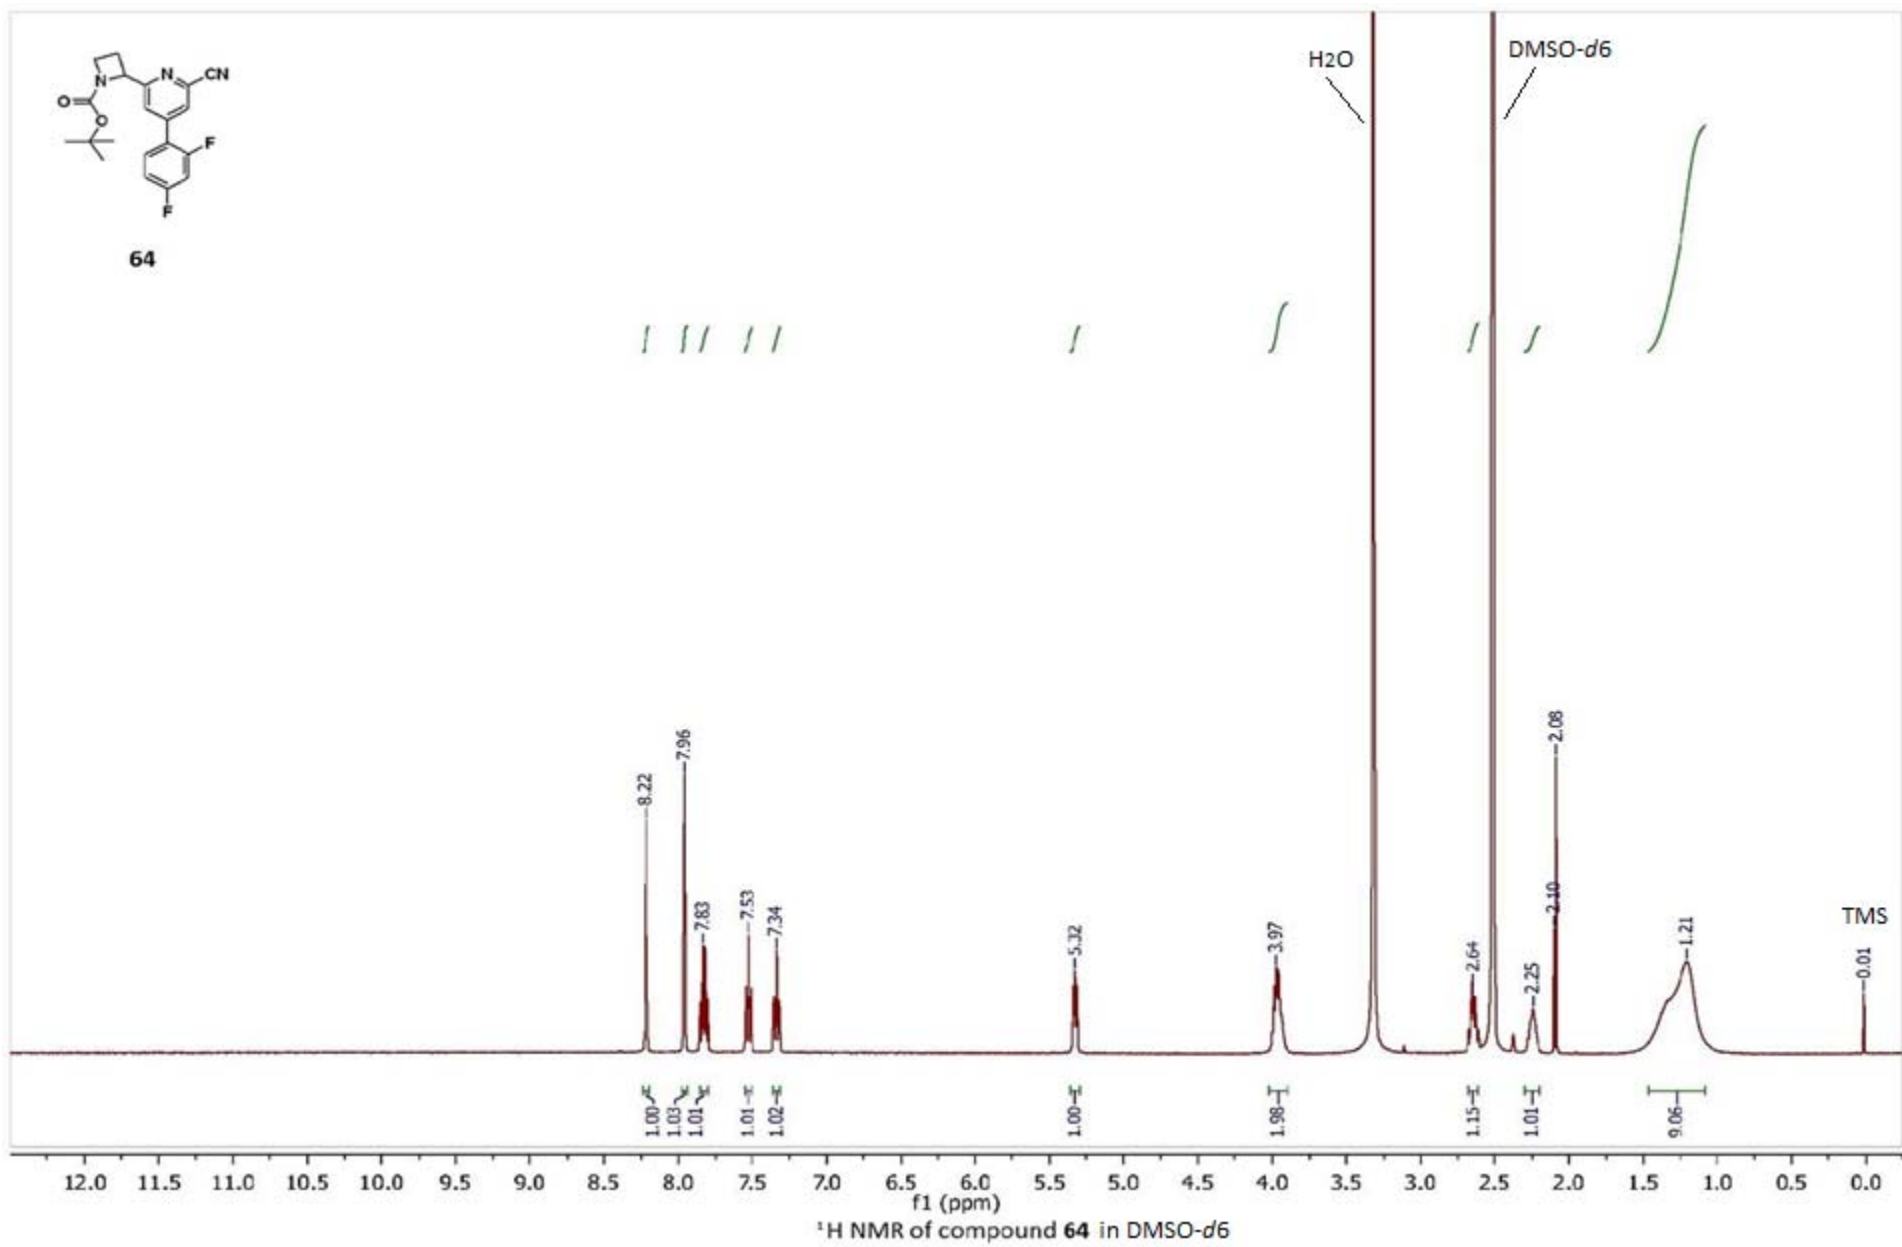

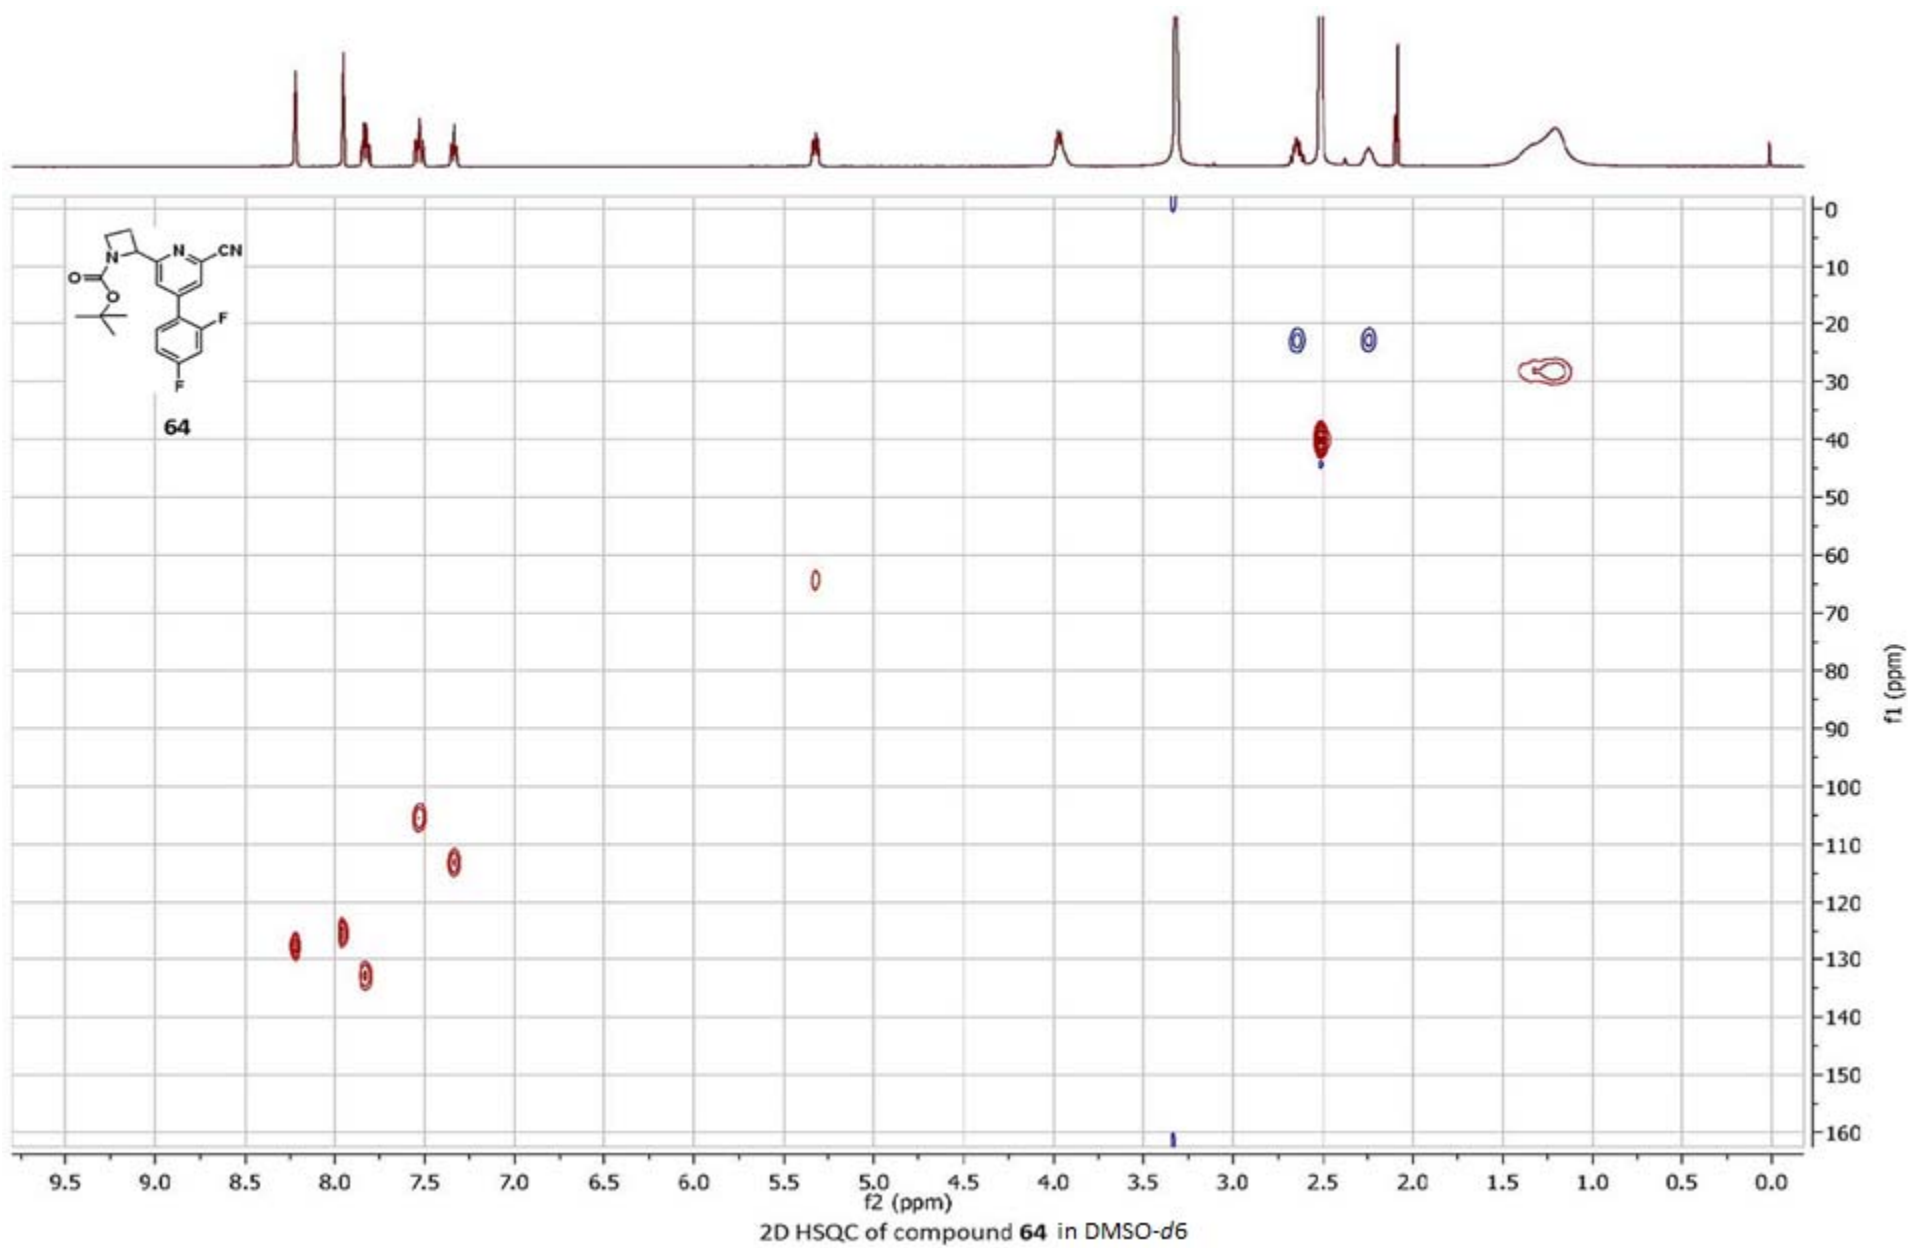

S200



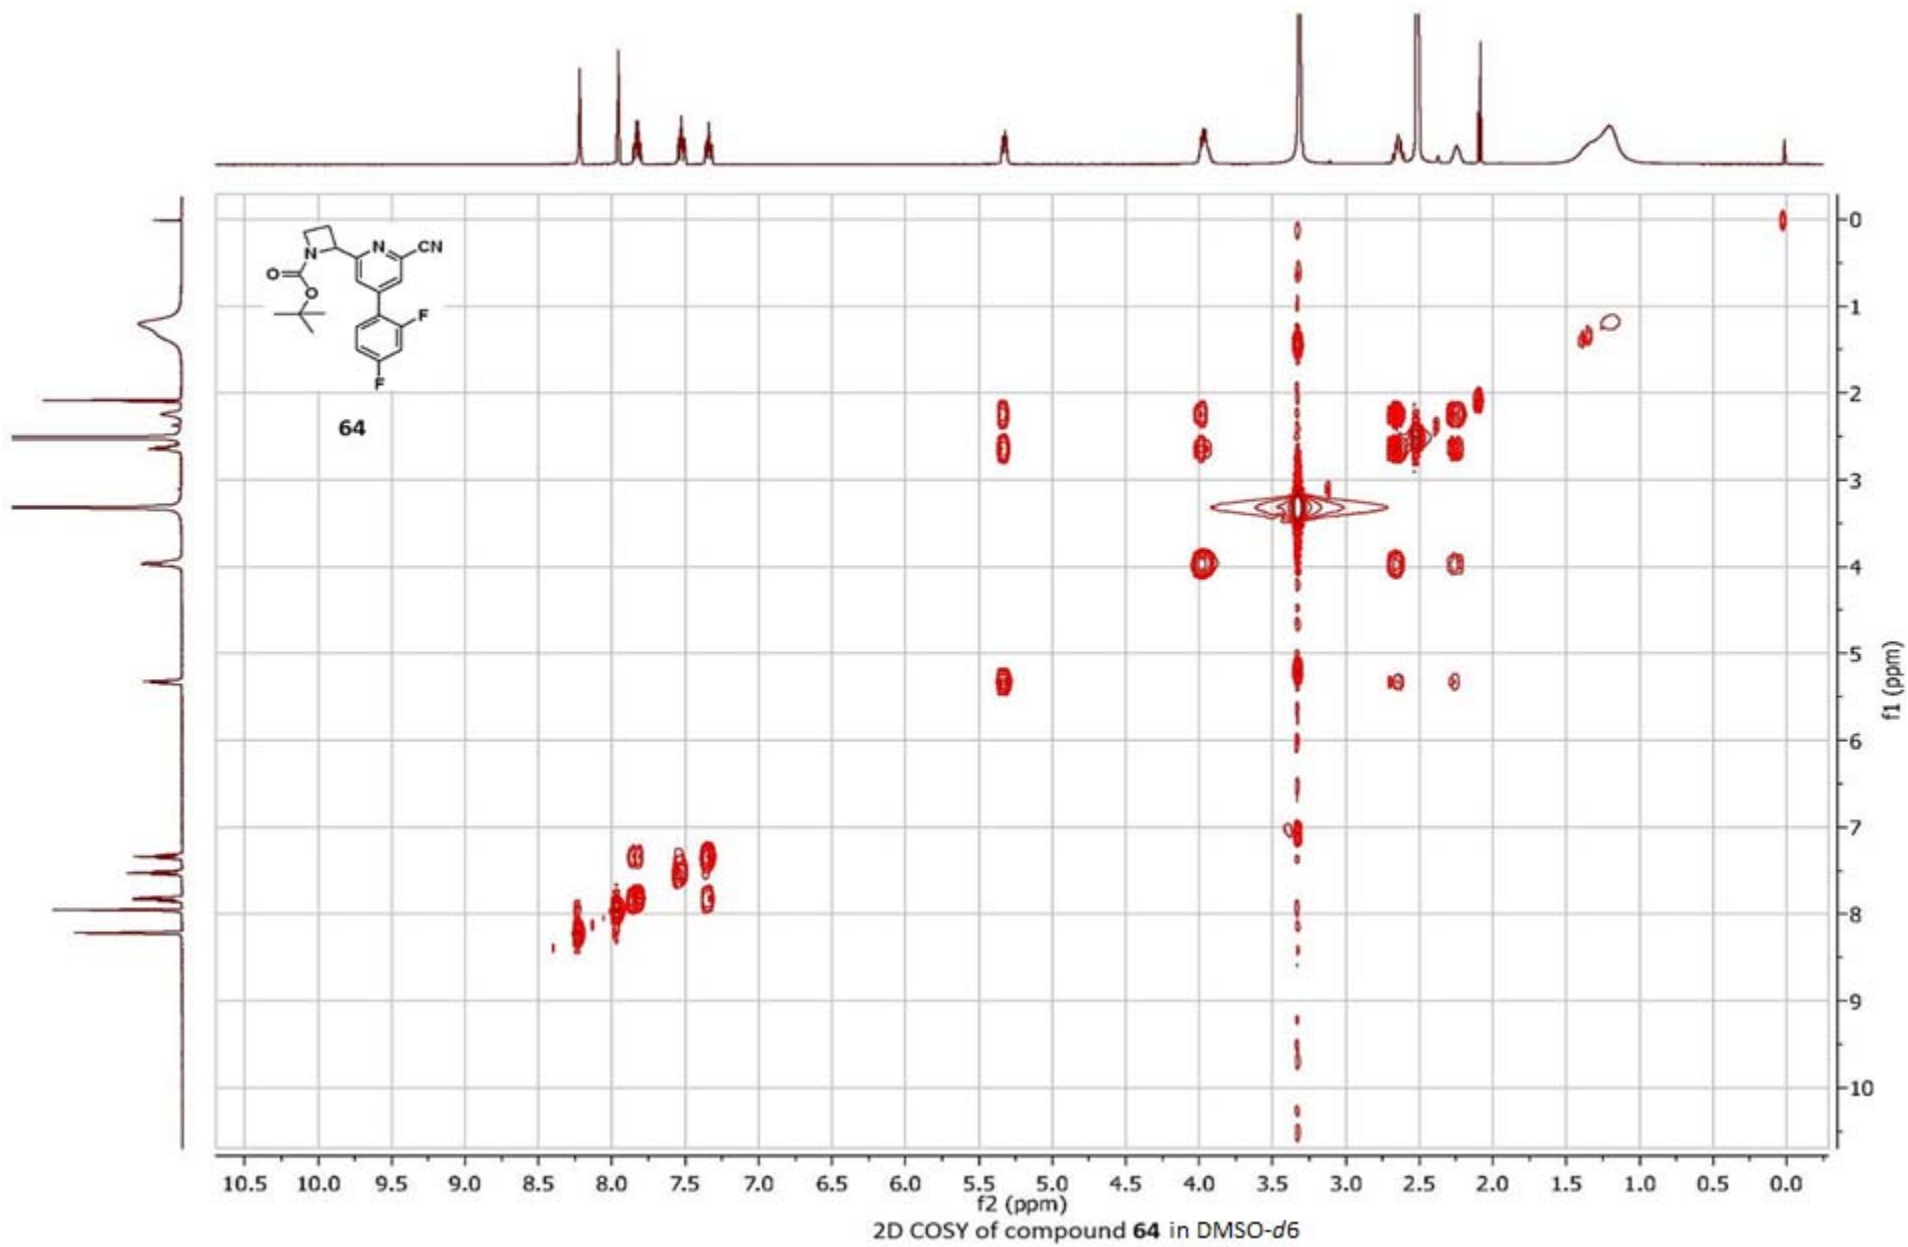

S201

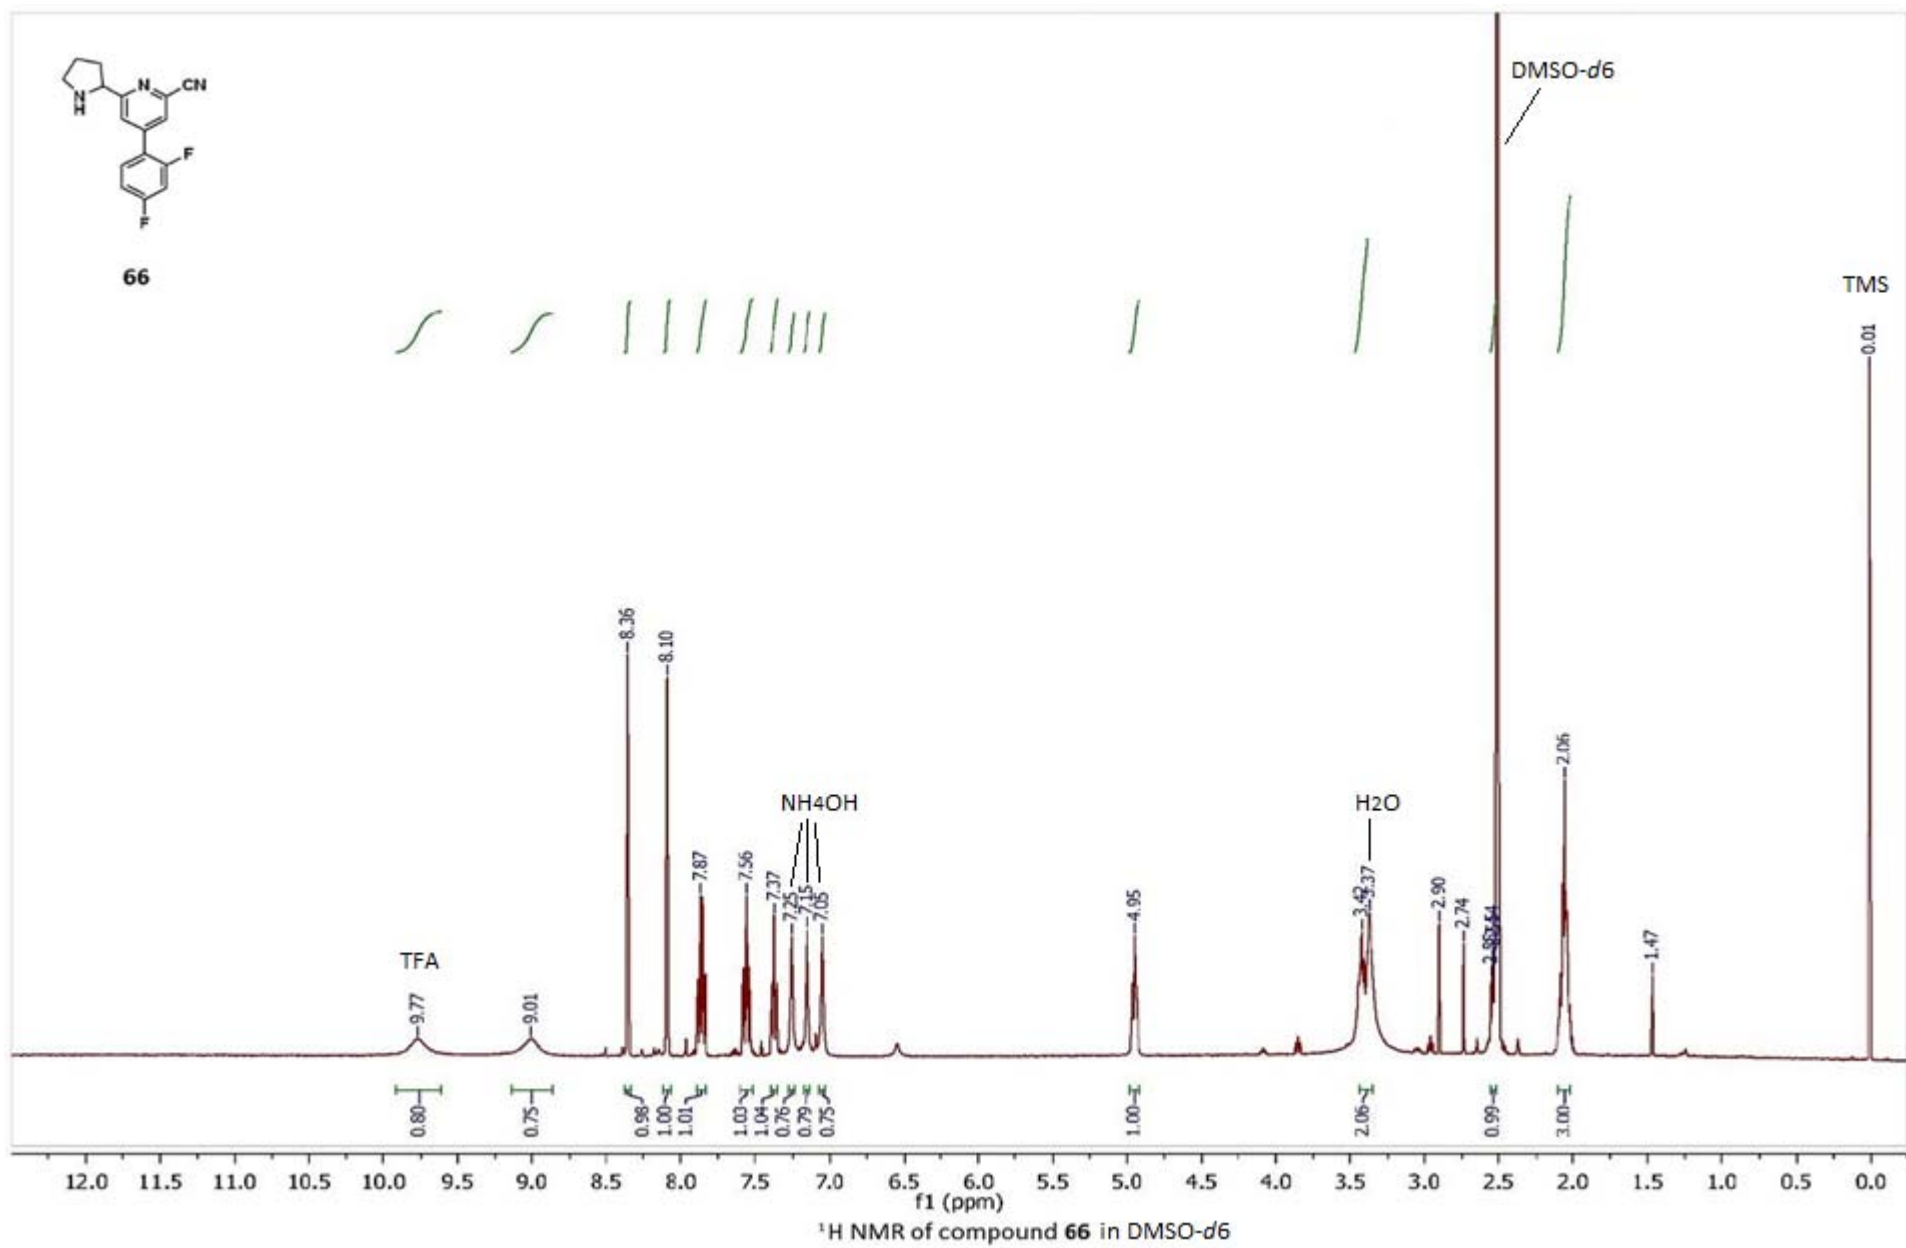

S202

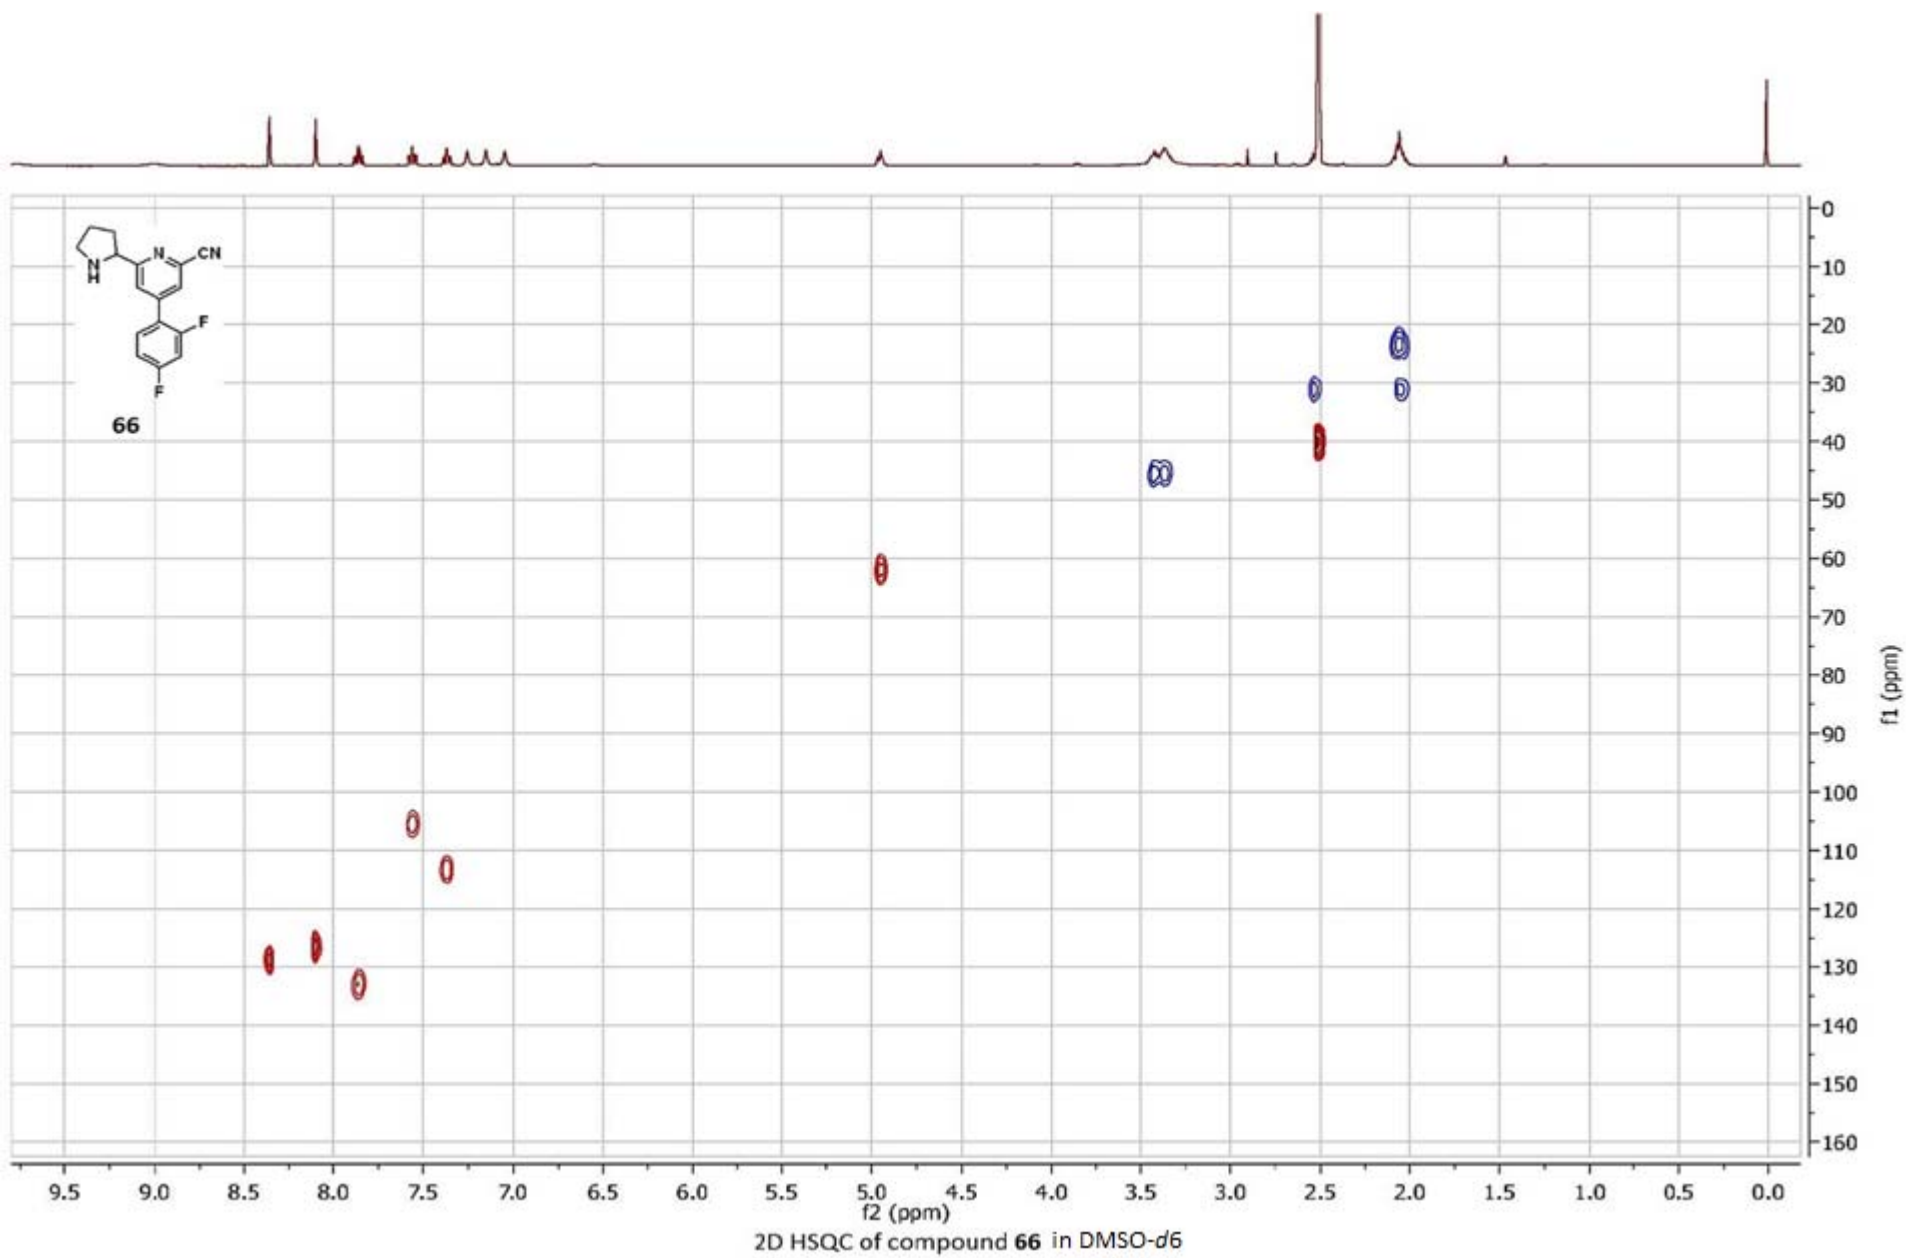

S203

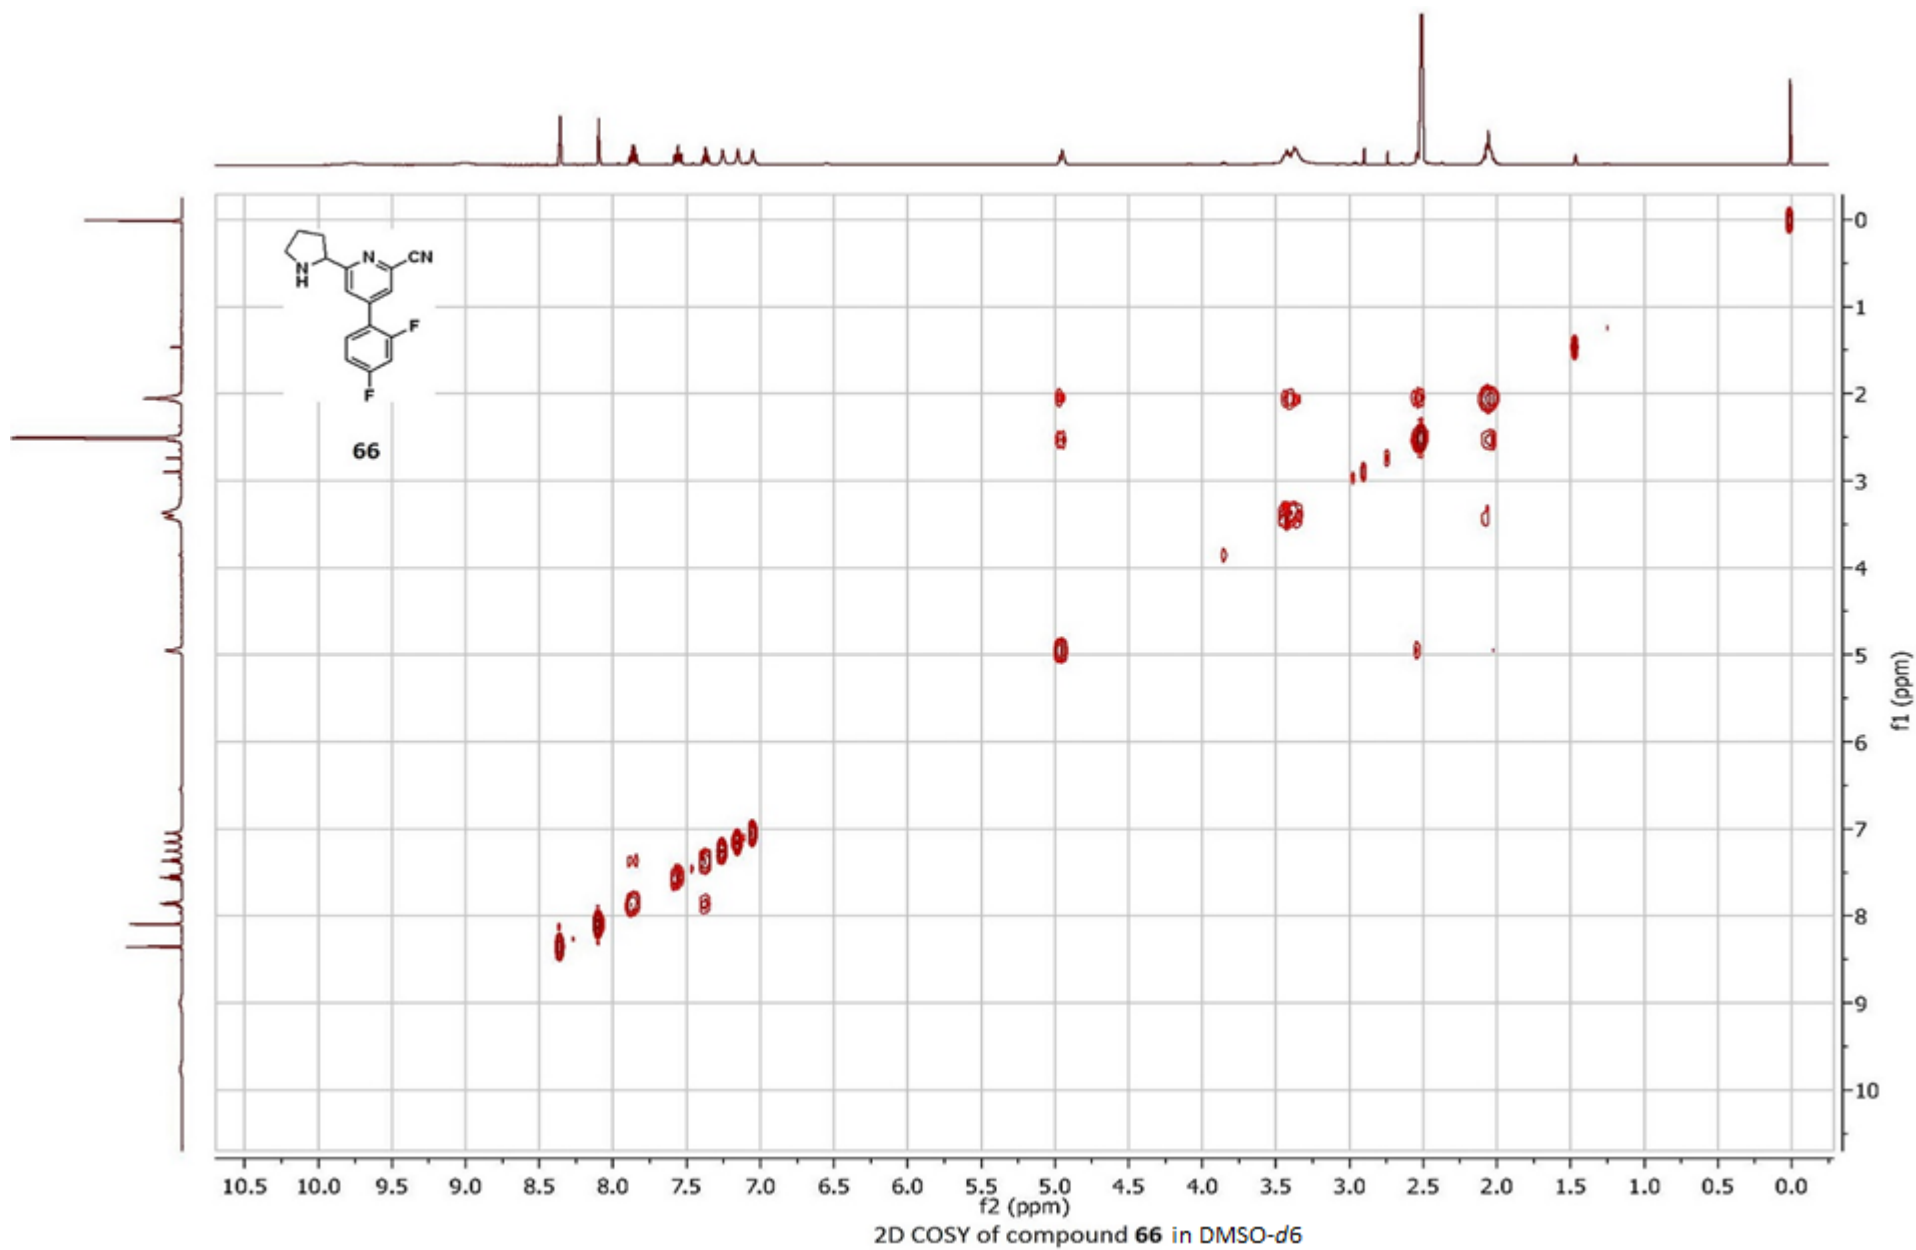

S204

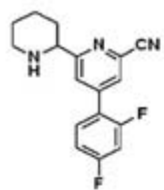

69

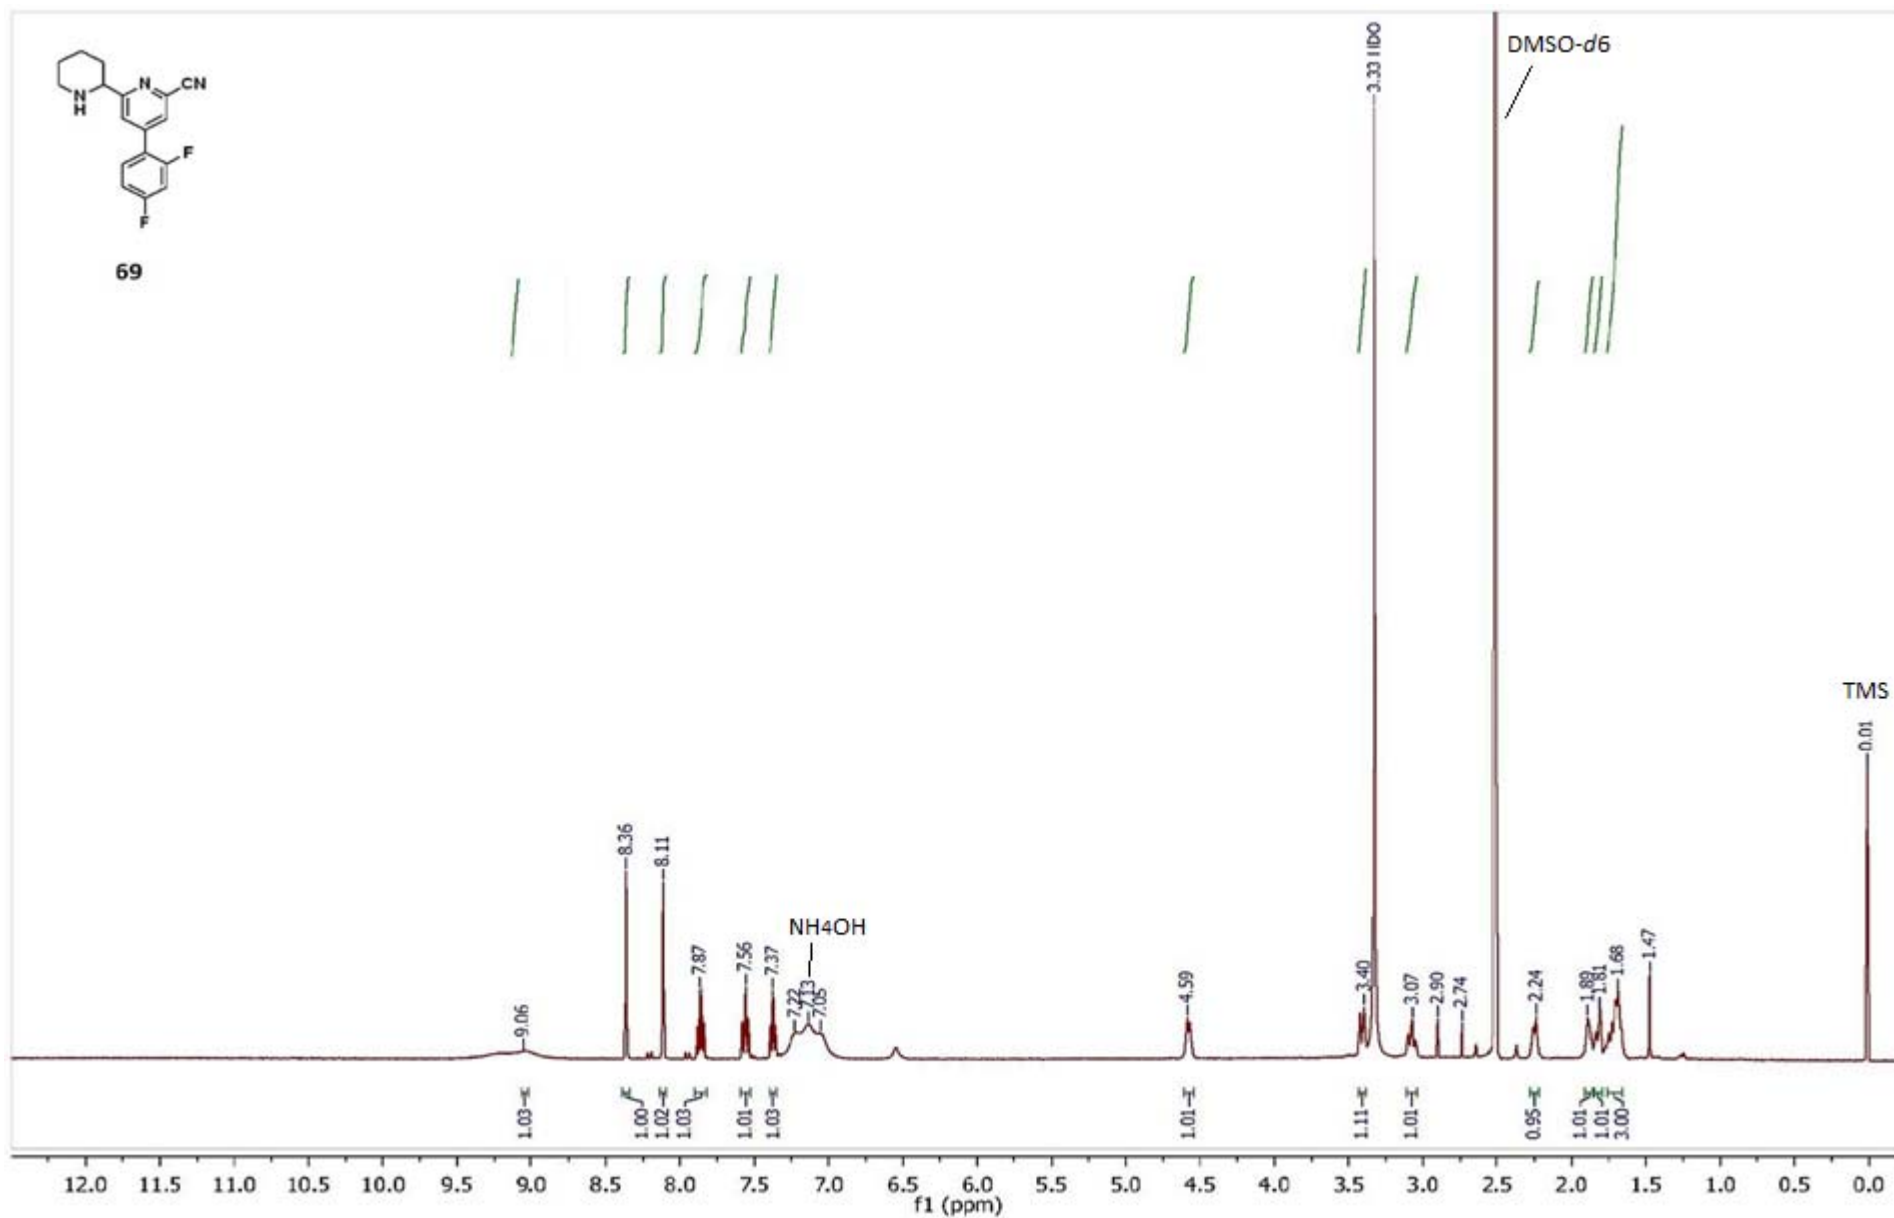

<sup>1</sup>H NMR of compound 69 in DMSO-d6

S205

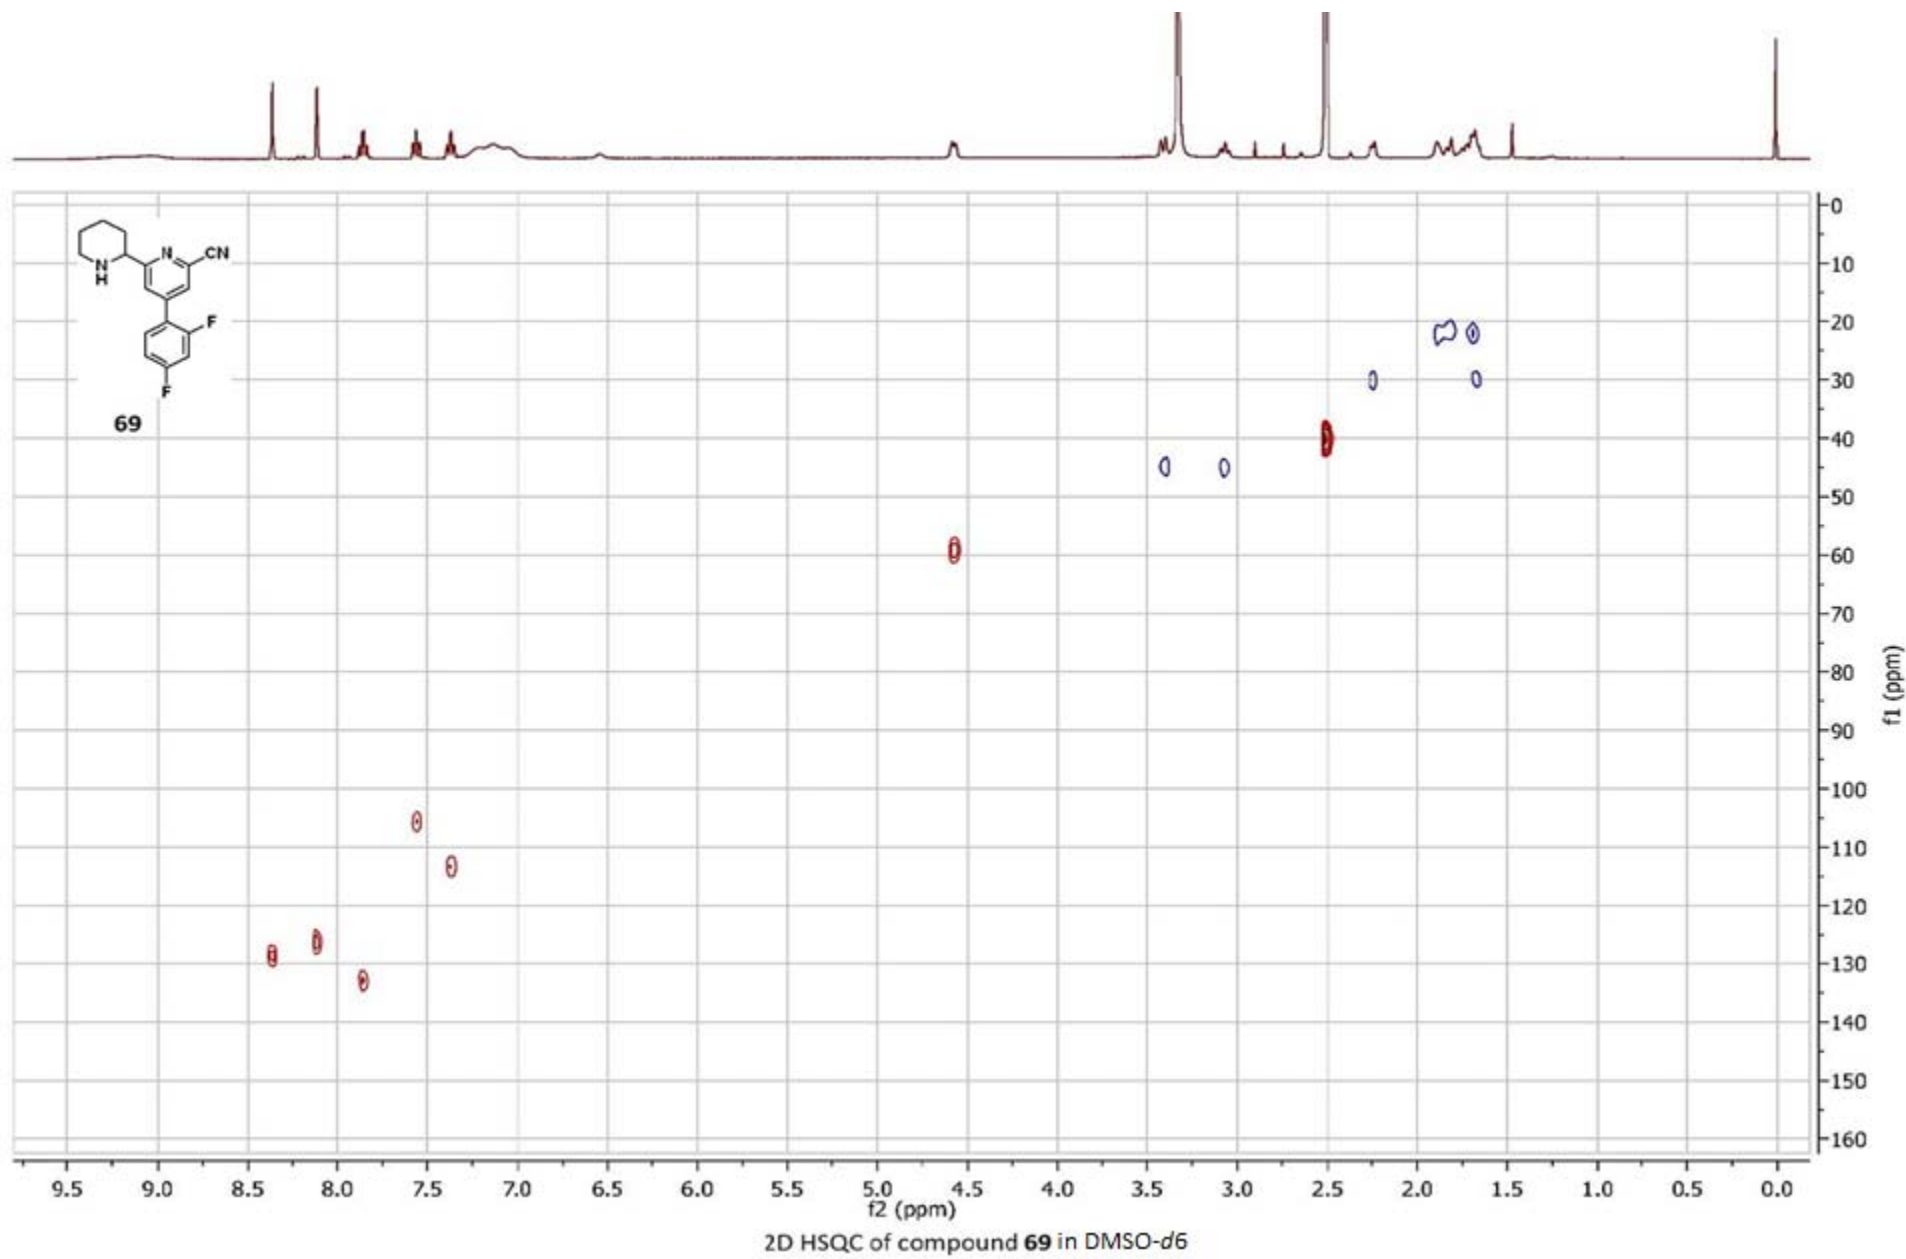

S206

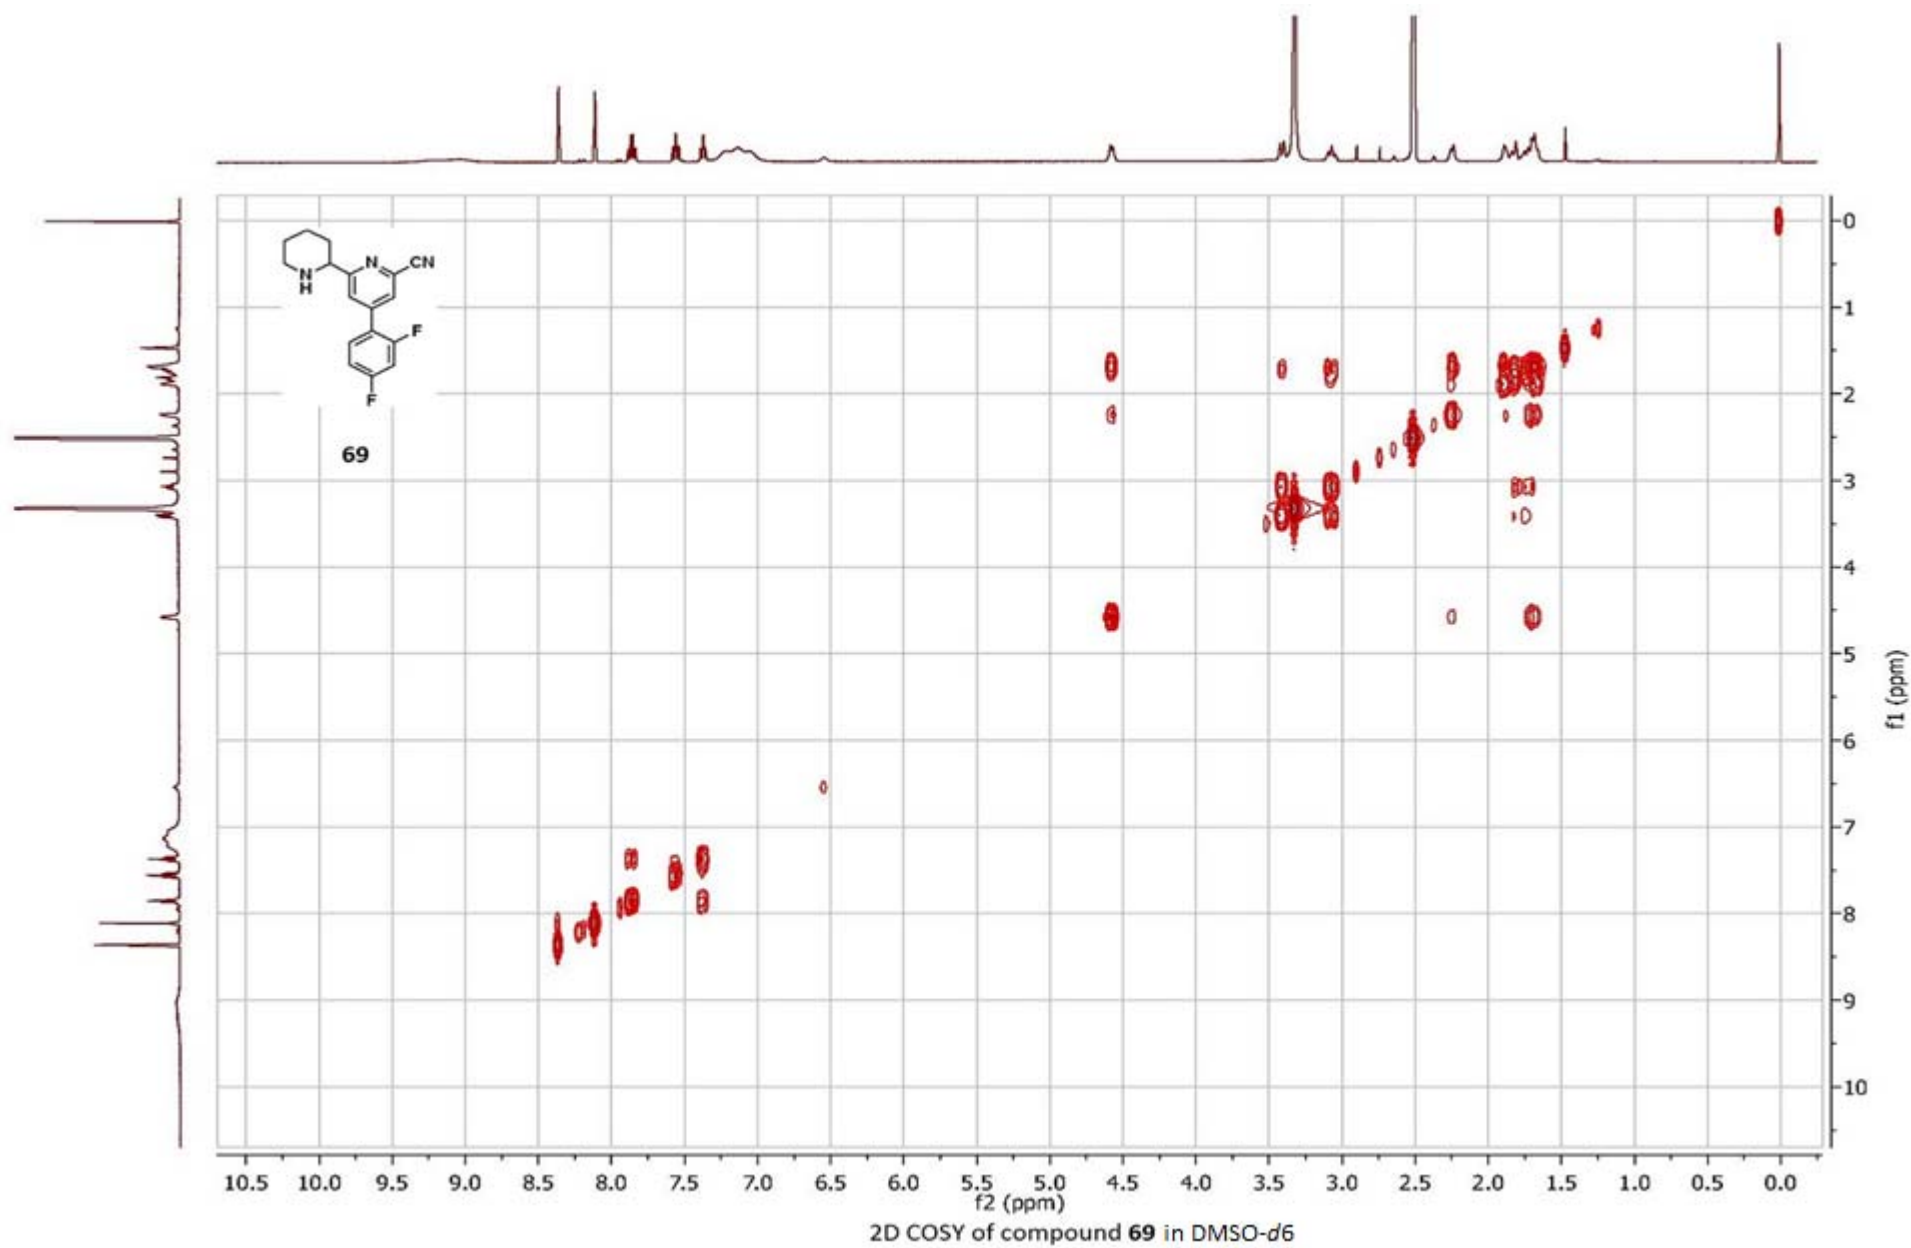

S207

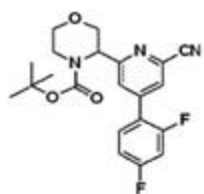

71

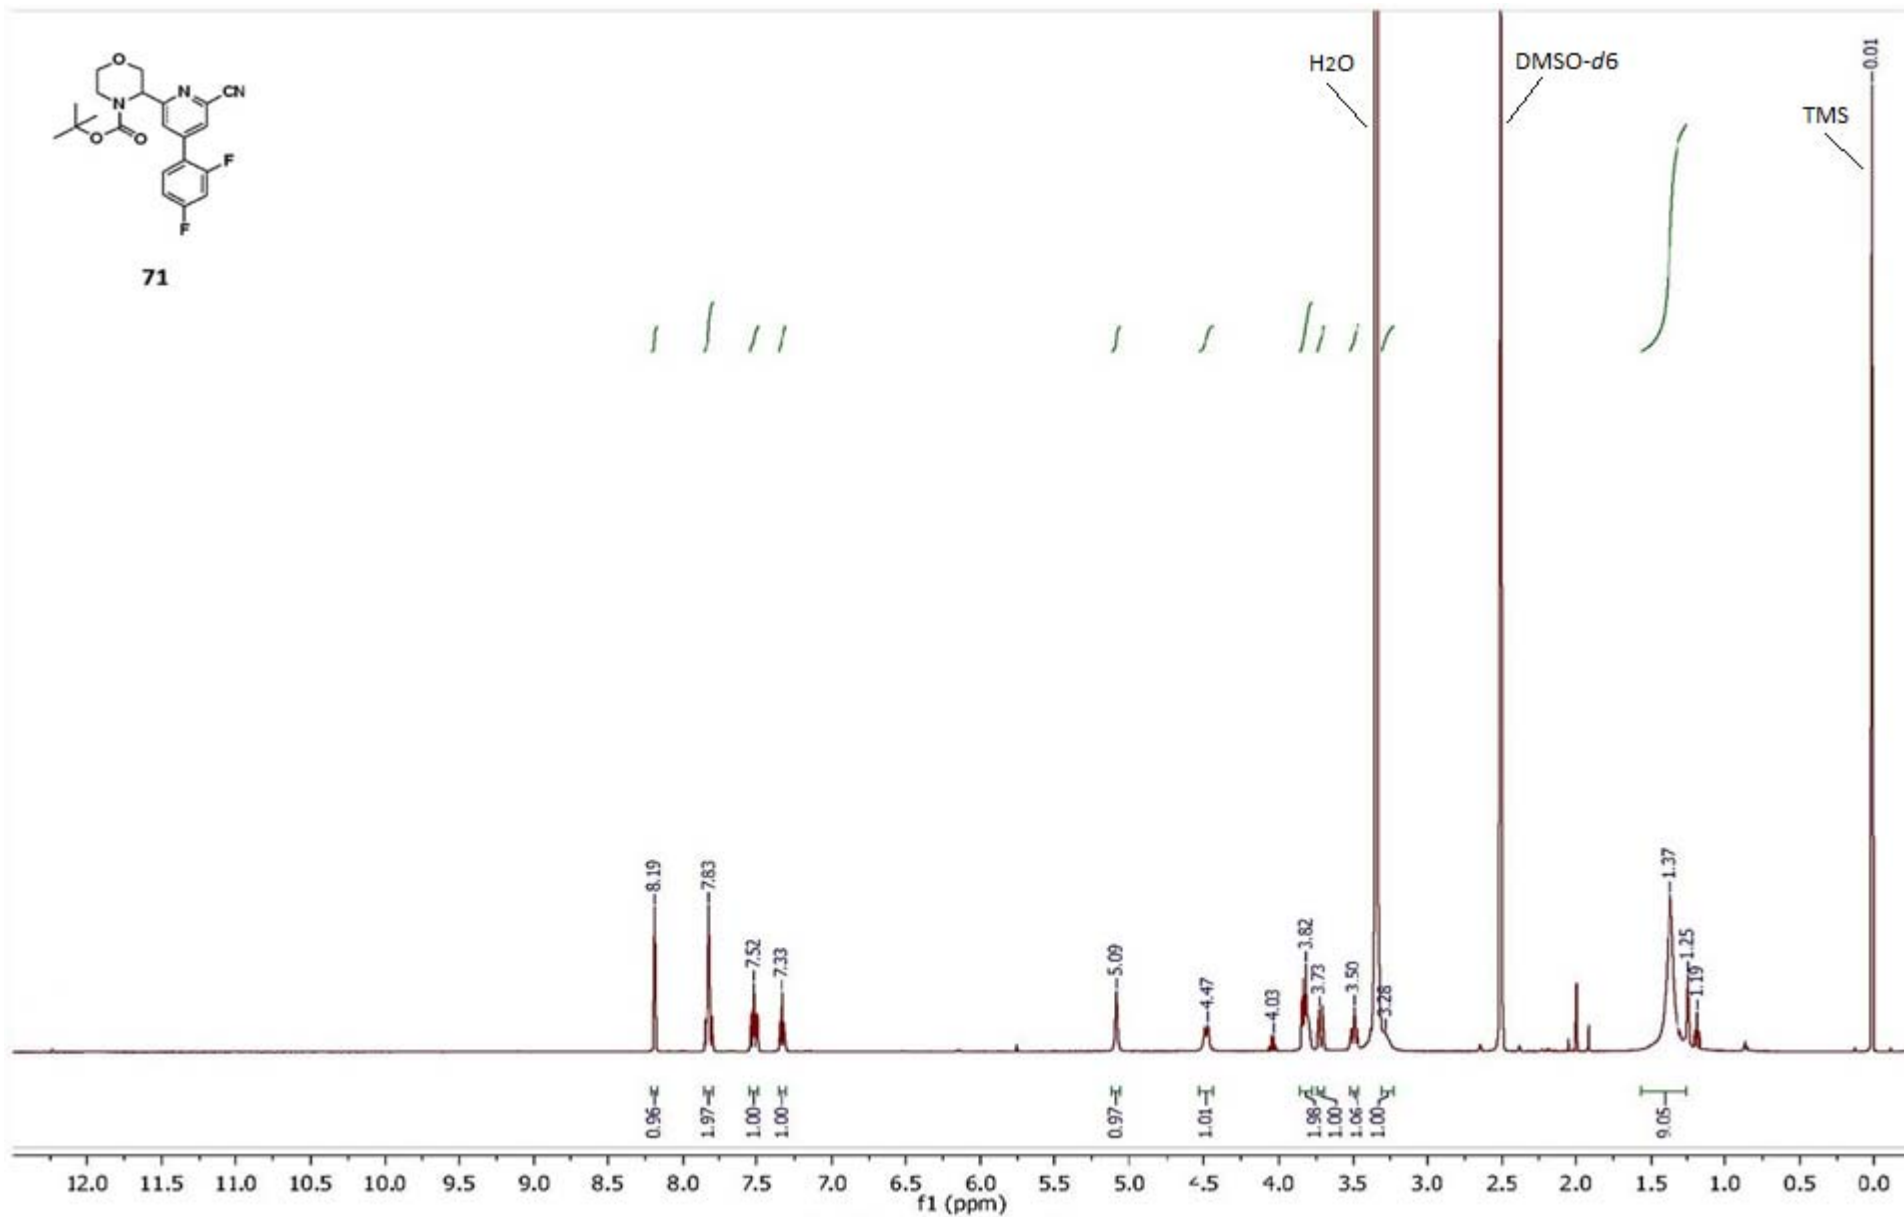

<sup>1</sup>H NMR of compound **71** in DMSO-*d*<sub>6</sub>

S208



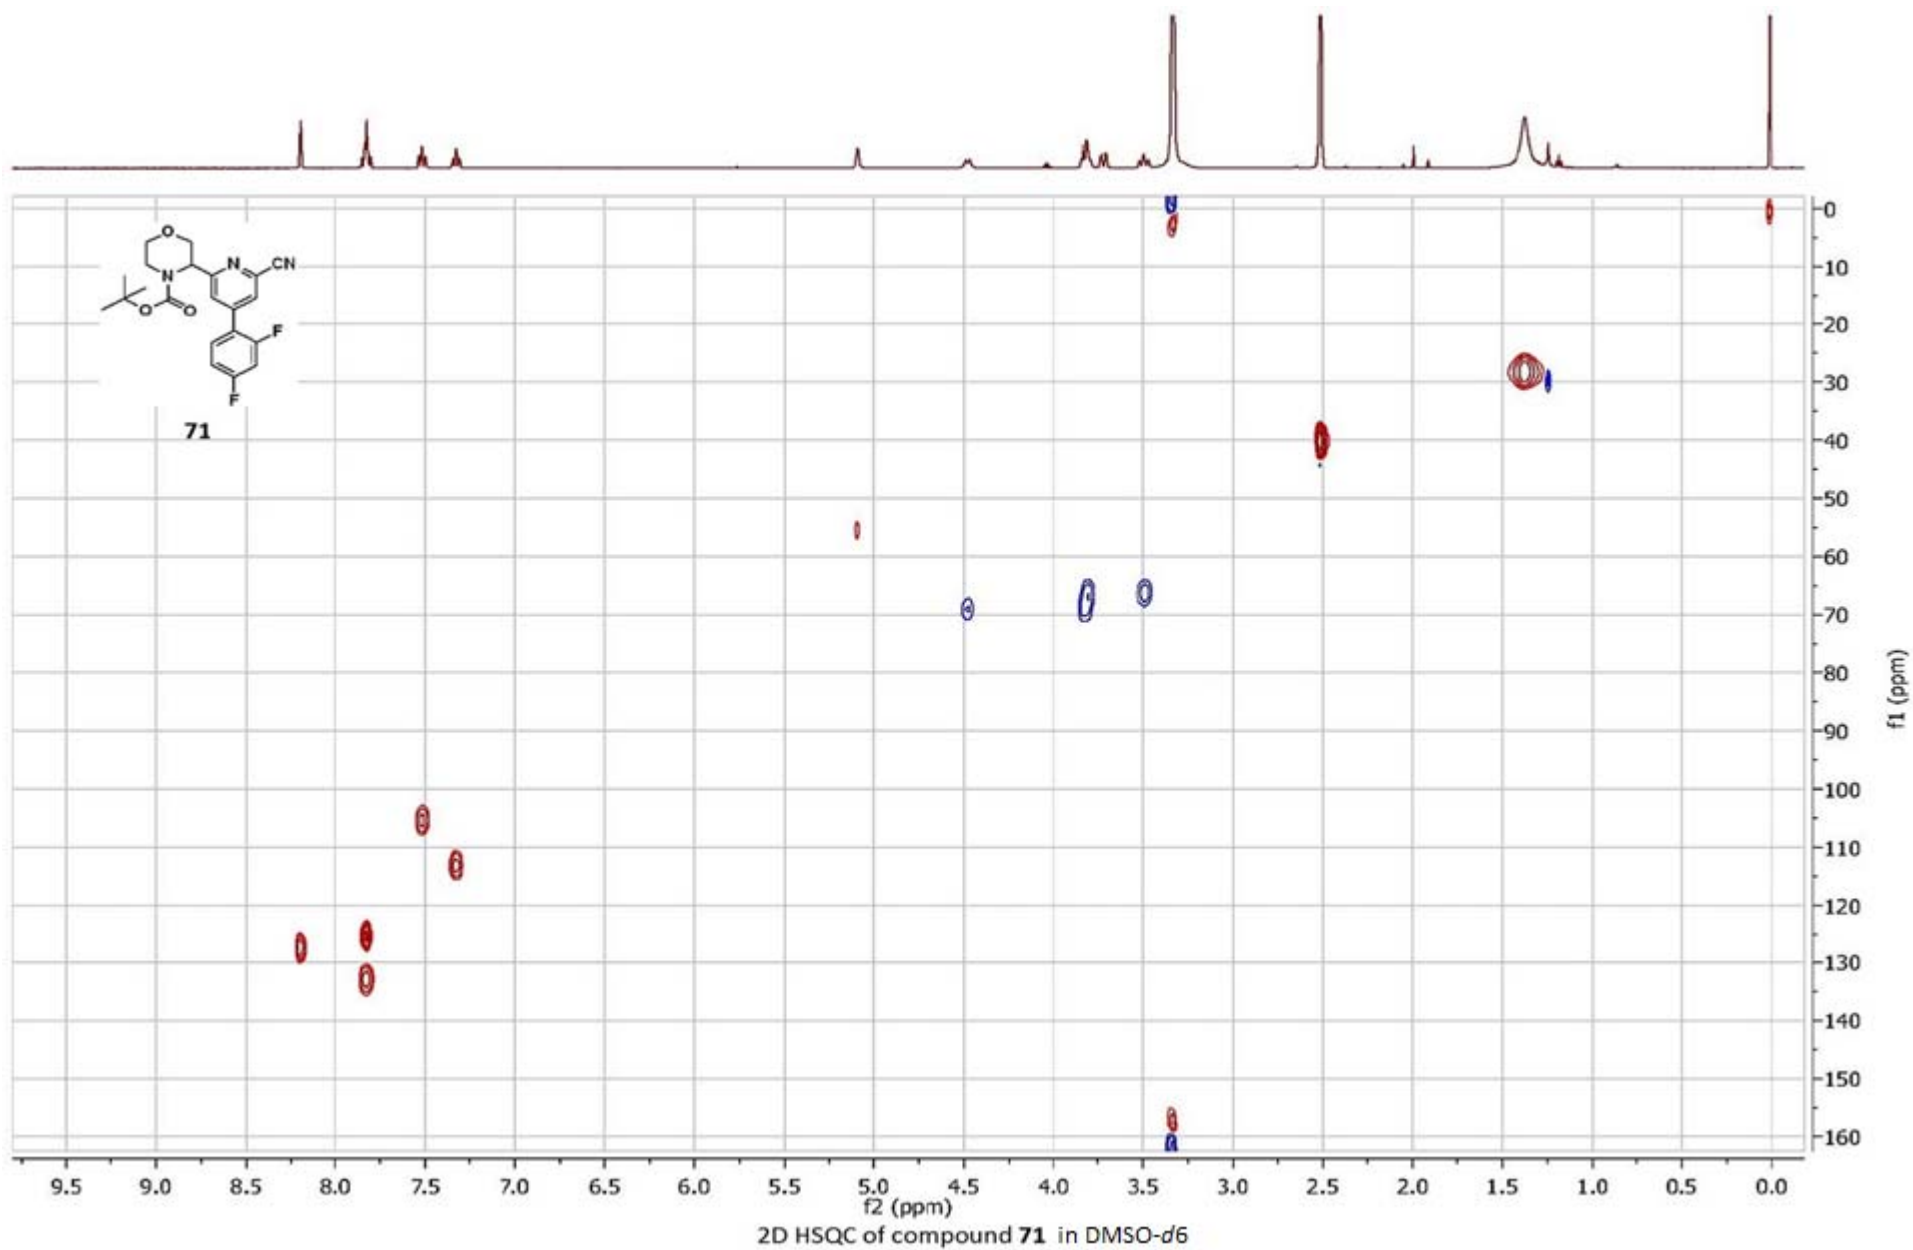

S209

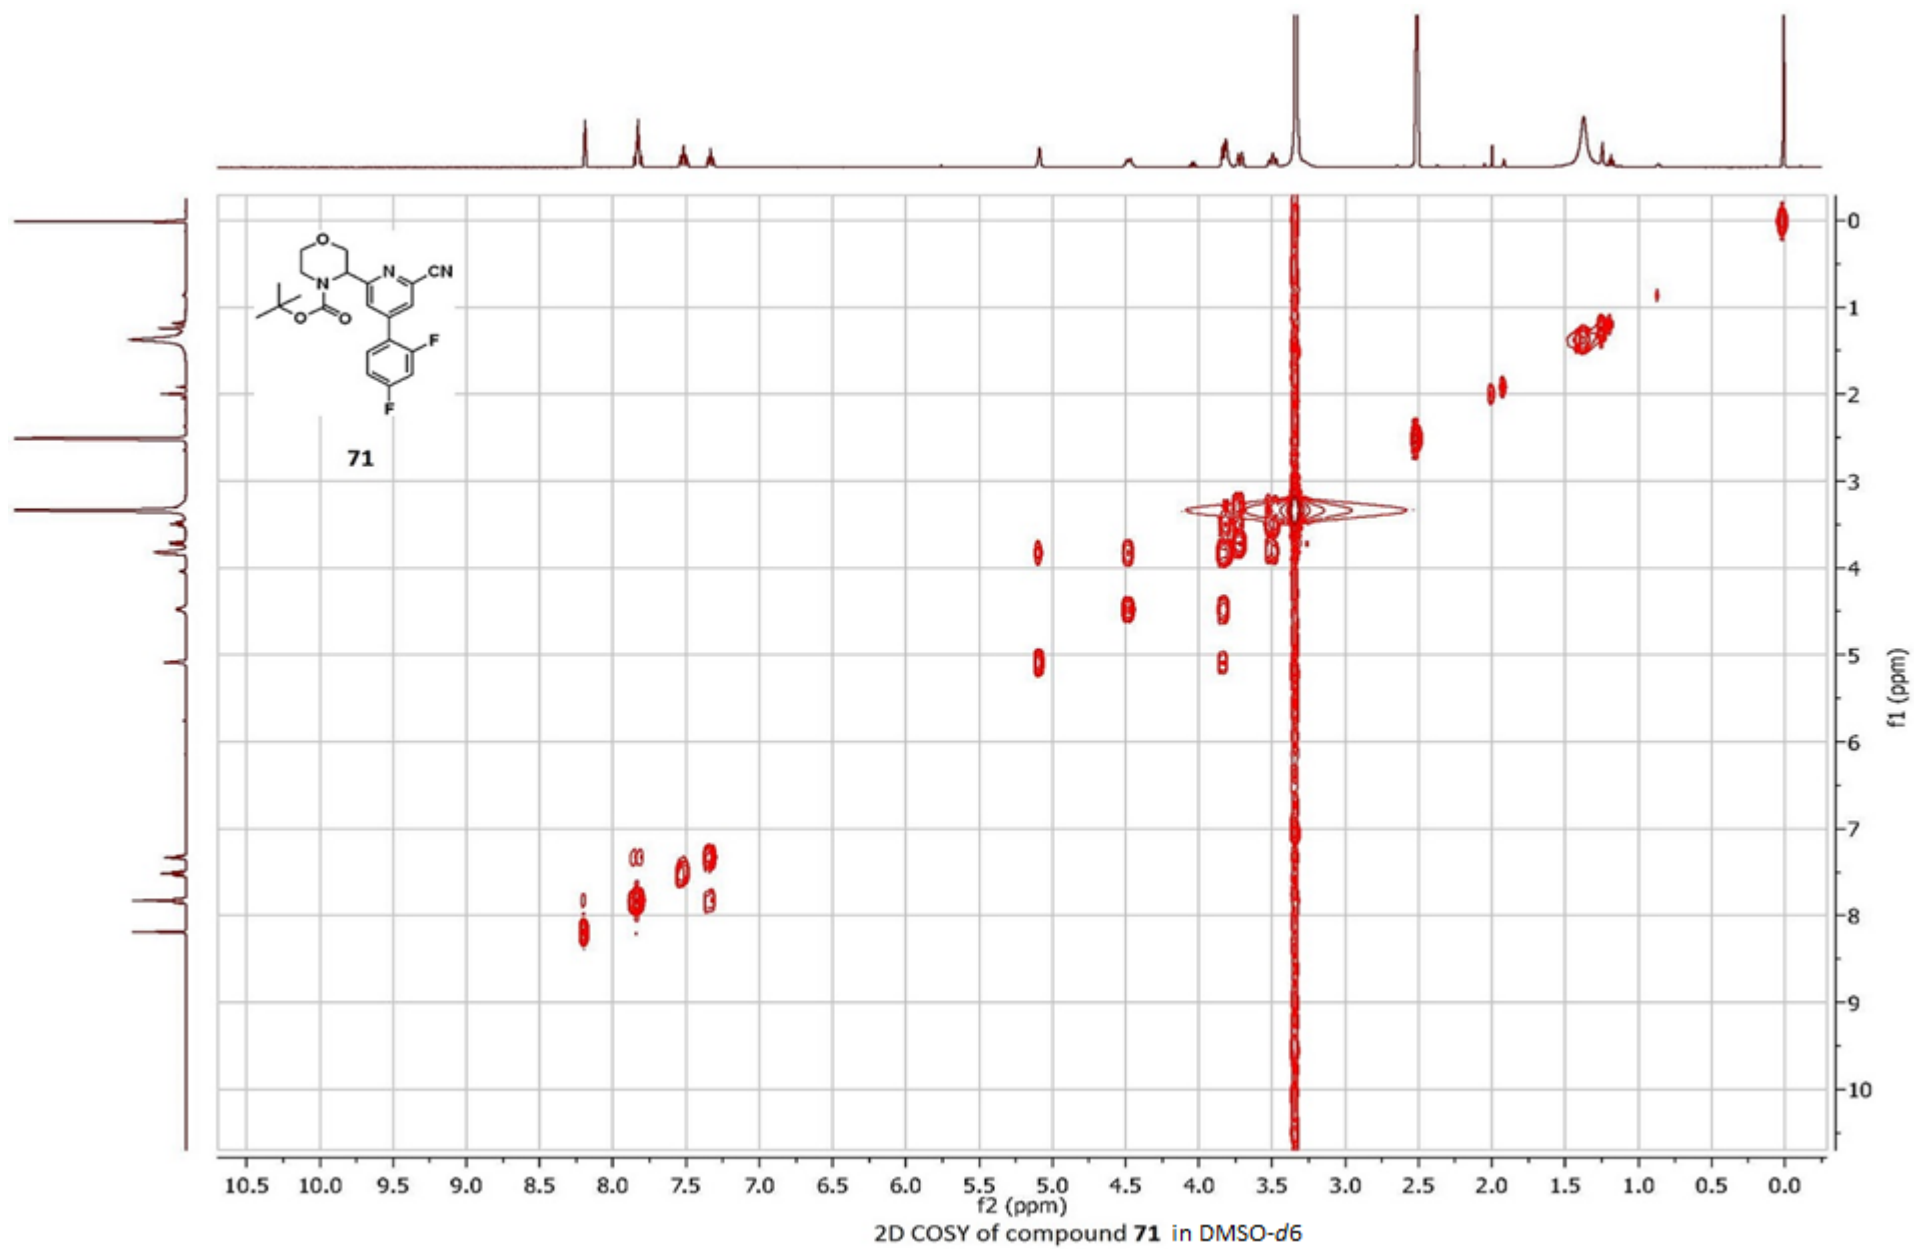

S210

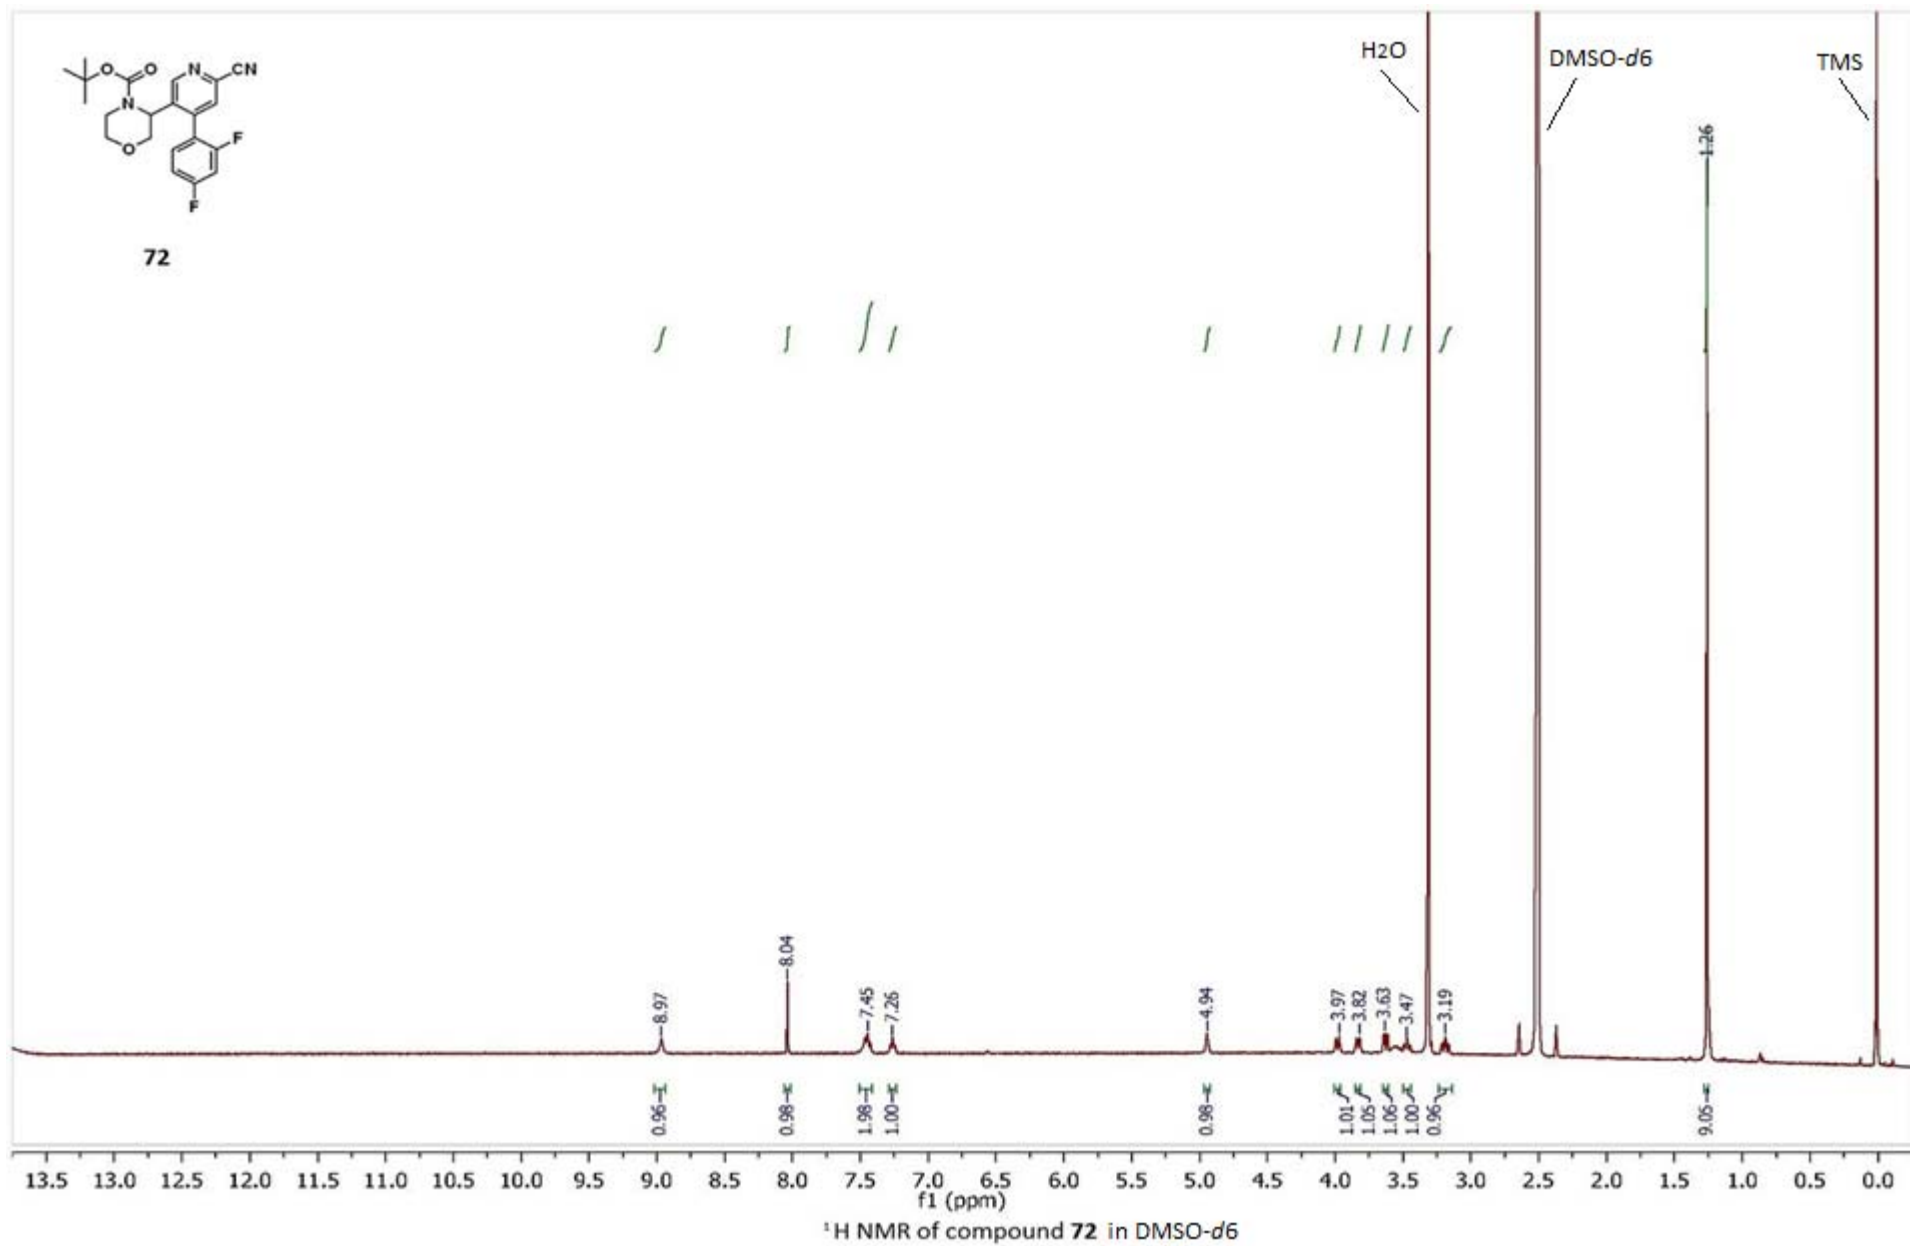

S211

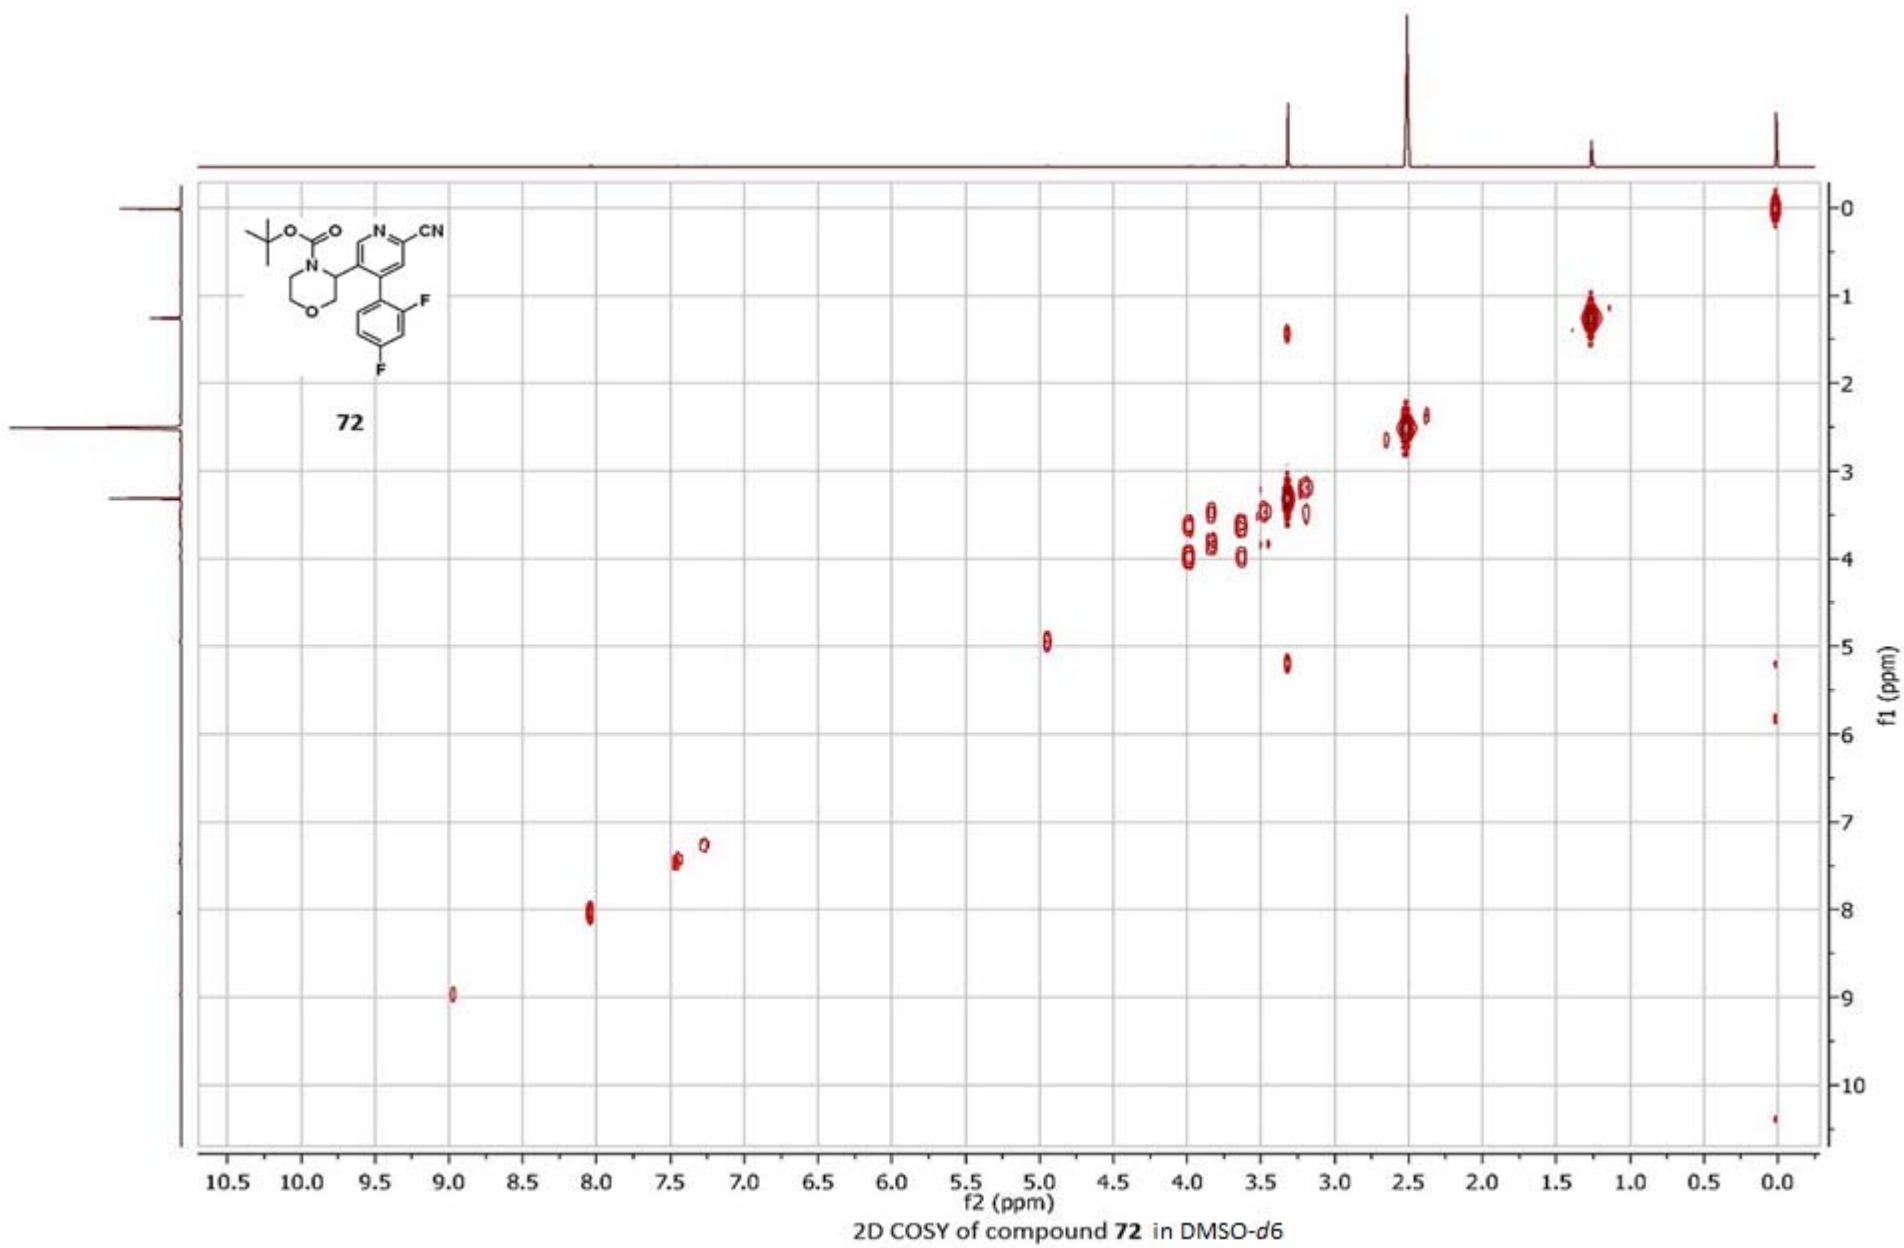

S212

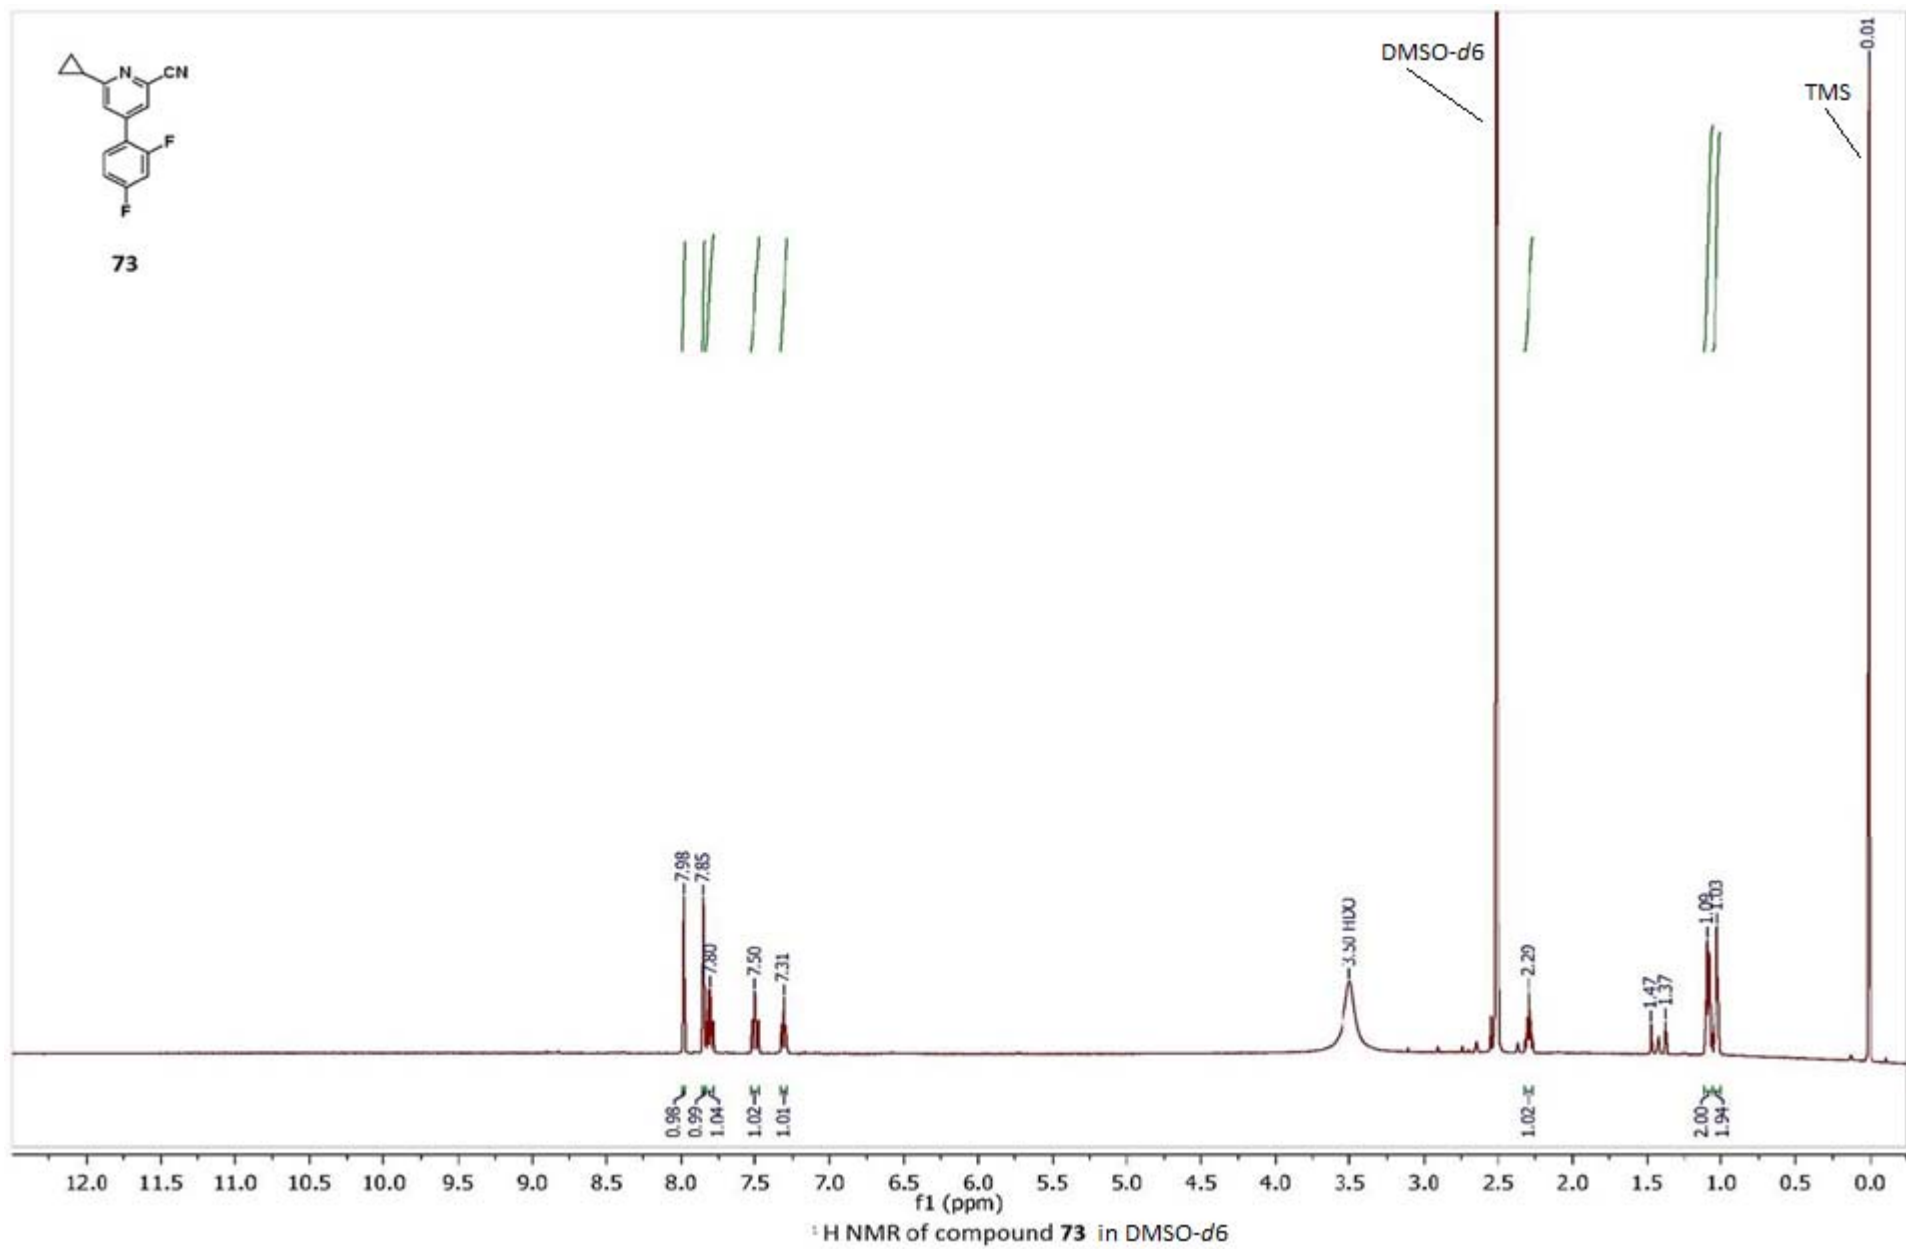

S213

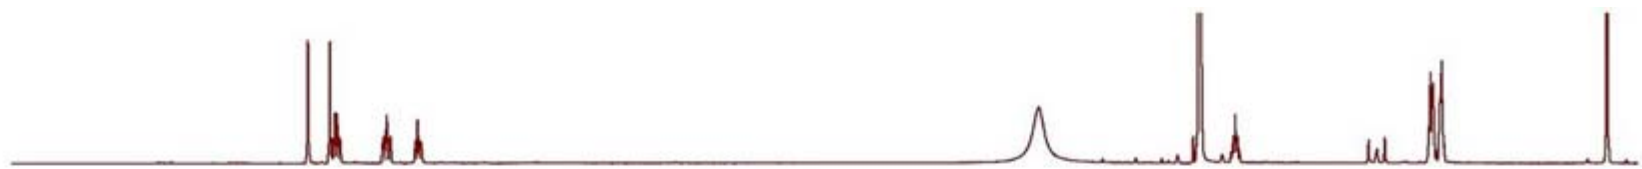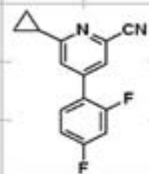

73

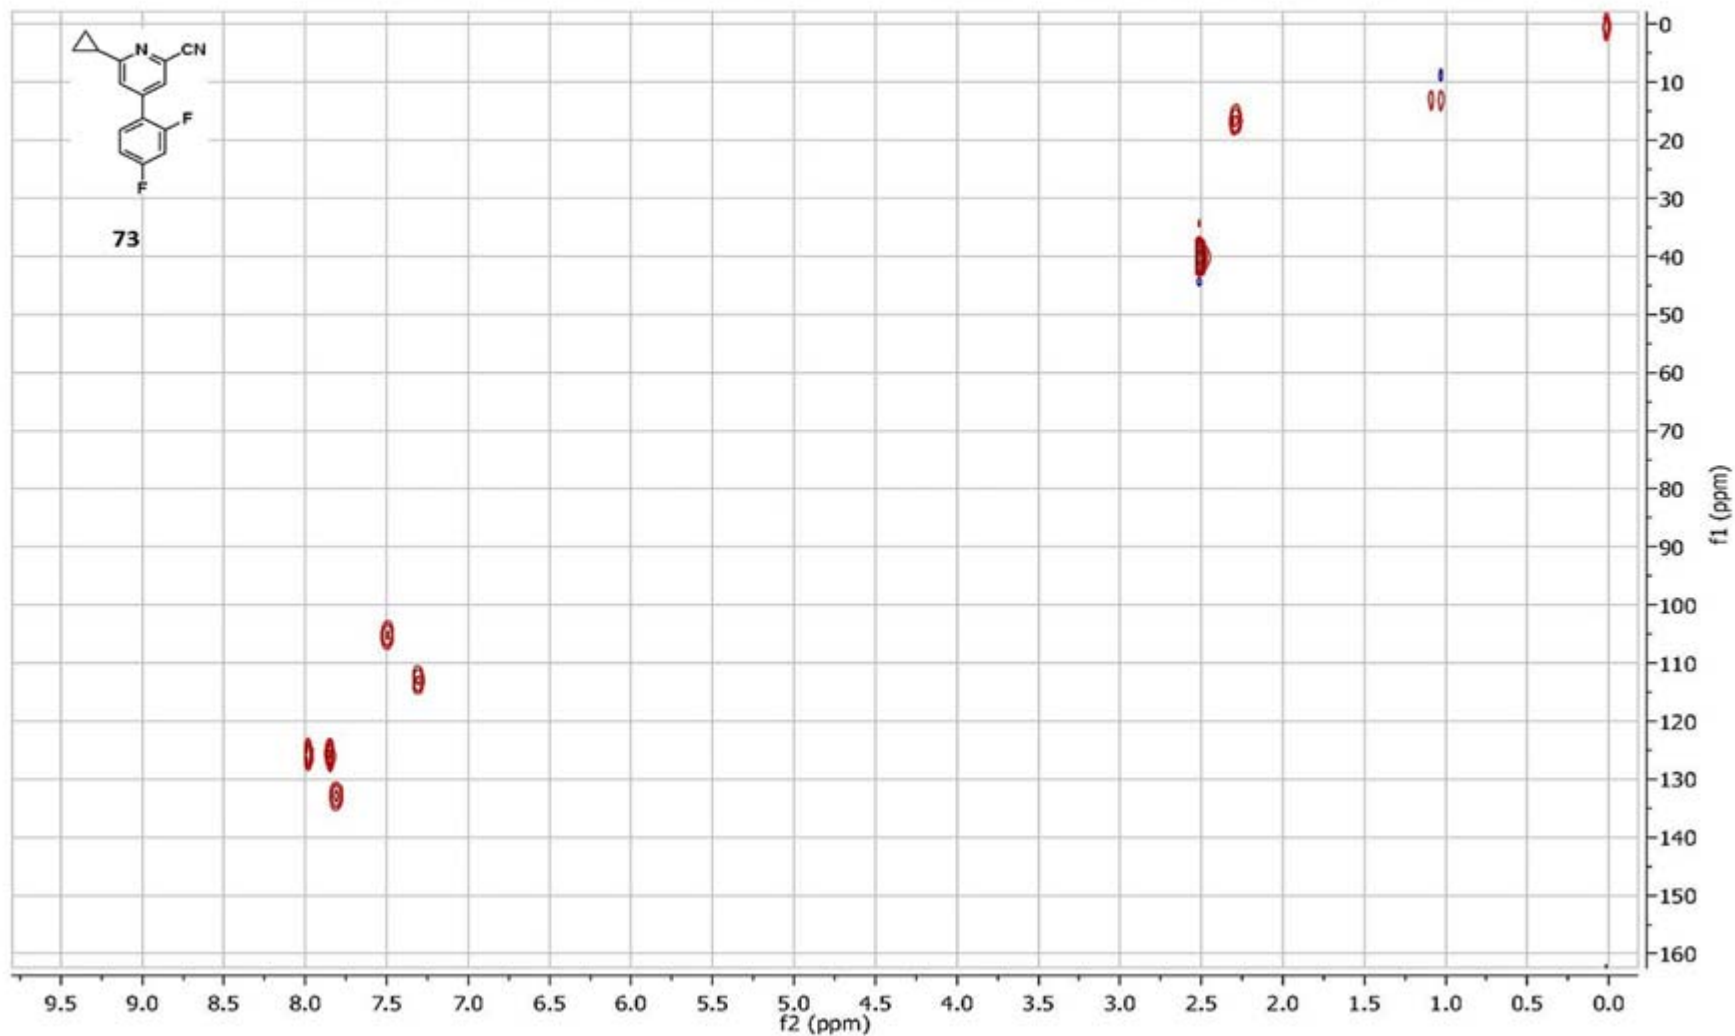

2D HSQC of compound **73** in DMSO-*d*<sub>6</sub>

S214

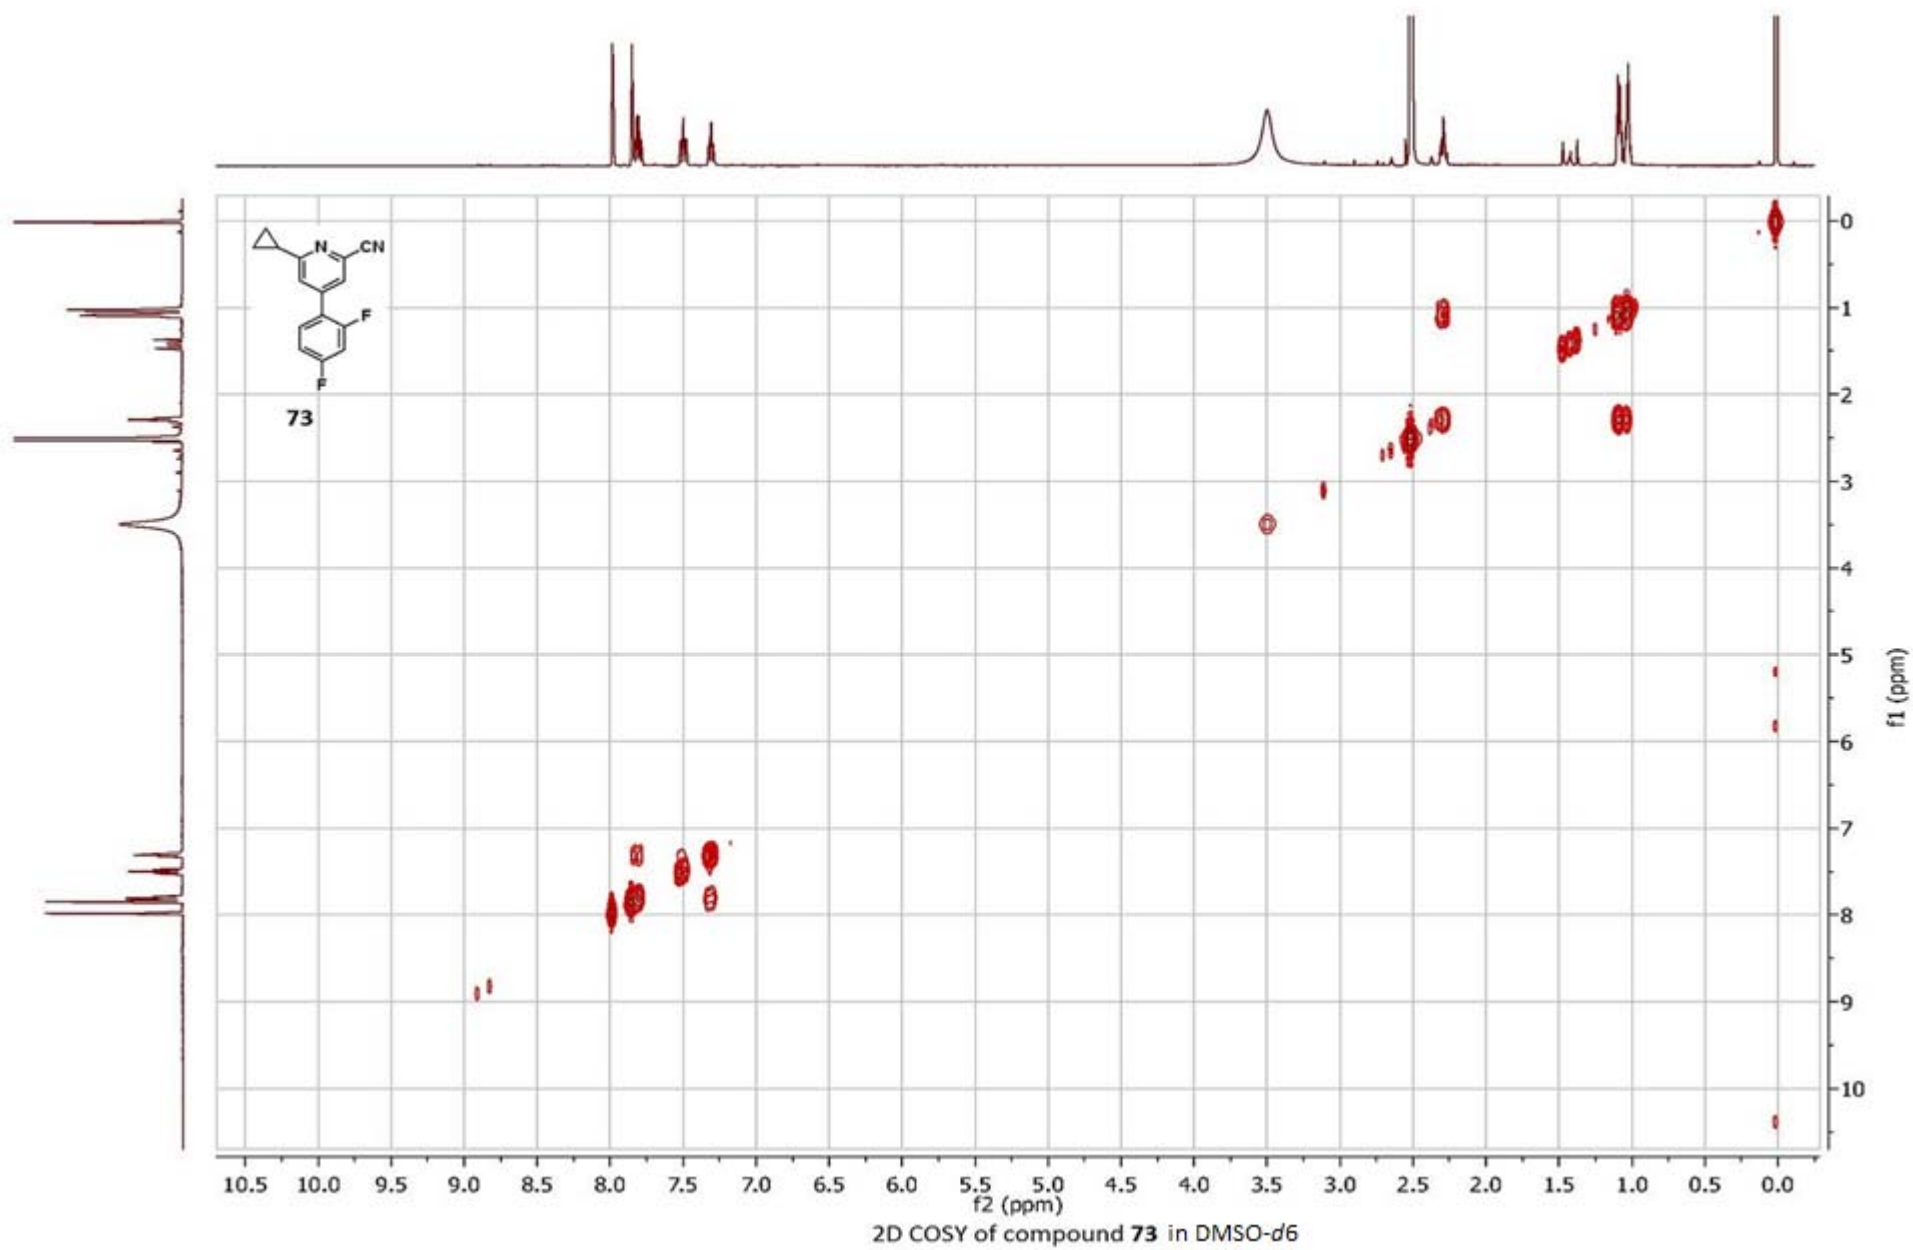

S215

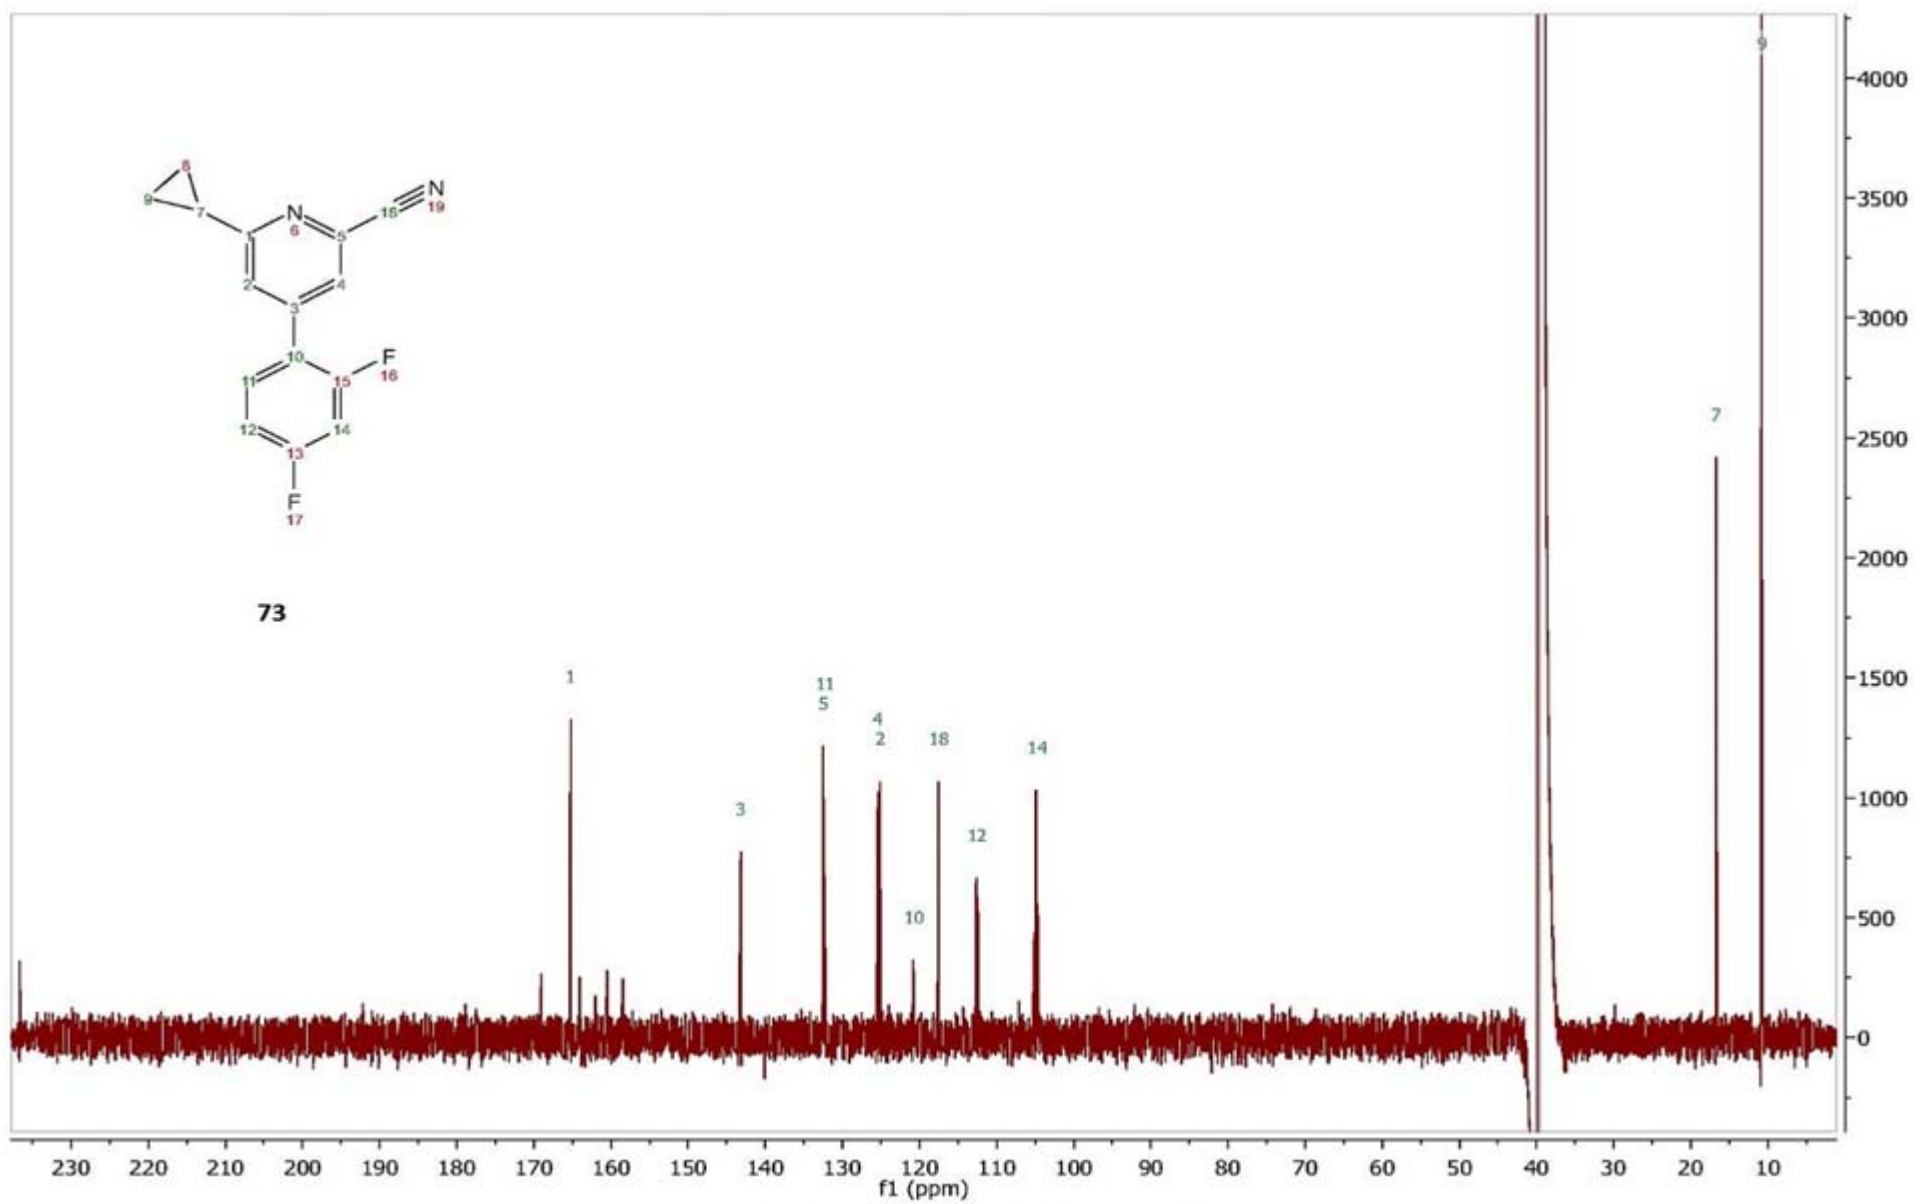

<sup>13</sup>C NMR of compound **73** in DMSO-*d*<sub>6</sub>
